# Supplementary material for: Global CpG DNA Methylation Footprint in Kaposi’s Sarcoma
Source: Front Cell Infect Microbiol. 2021 Jul 9;11:666143. doi: 10.3389/fcimb.2021.666143 (PMC8300563; doi:10.3389/fcimb.2021.666143)
Supplement: Supplementary Table 1 — Differentially methylated CpGs. [file Table_1.xlsx]

## Sheet: Hyper 0.25 nodule
IlmnID	Genome_Build	CHR	MAPINFO	UCSC_RefGene_Name	UCSC_RefGene_Accession	UCSC_RefGene_Group	UCSC_CpG_Islands_Name	Relation_to_UCSC_CpG_Island	Phantom4_Enhancers	Phantom5_Enhancers	Methyl450_Loci	Cont. Mean	KS Mean	KS Minus Cont.
cg08546707	37	1	846195				chr1:844299-845883	S_Shore			TRUE	0.43515	0.746636	0.311485
cg08186992	37	1	848523				chr1:844299-845883	S_Shelf				0.26902	0.532027	0.263007
cg22226438	37	1	854766	FLJ39609	NR_026874	Body	chr1:854765-854973	Island			TRUE	0.477711	0.731288	0.253577
cg08029603	37	1	854824	FLJ39609	NR_026874	TSS200	chr1:854765-854973	Island			TRUE	0.416805	0.71509	0.298284
cg02565062	37	1	855544	FLJ39609	NR_026874	TSS1500	chr1:854765-854973	S_Shore			TRUE	0.183106	0.443088	0.259982
cg01197763	37	1	858362				chr1:858970-861632	N_Shore		chr1:858256-858256	TRUE	0.481572	0.847164	0.365592
cg13806162	37	1	865013	SAMD11	NM_152486	Body	chr1:858970-861632	S_Shelf			TRUE	0.458343	0.76772	0.309376
cg05819296	37	1	871980	SAMD11	NM_152486	Body	chr1:869332-871872	S_Shore			TRUE	0.289819	0.602532	0.312713
cg00582671	37	1	872235	SAMD11	NM_152486	Body	chr1:869332-871872	S_Shore			TRUE	0.388446	0.763987	0.375541
cg22485363	37	1	872385	SAMD11	NM_152486	Body	chr1:869332-871872	S_Shore			TRUE	0.438443	0.707543	0.2691
cg06036236	37	1	872737	SAMD11	NM_152486	Body	chr1:869332-871872	S_Shore			TRUE	0.426771	0.720753	0.293981
cg01108617	37	1	898744	KLHL17	NM_198317	Body	chr1:894313-902654	Island				0.596414	0.888095	0.291682
cg07195057	37	1	907118	PLEKHN1;PLEKHN1	NM_032129;NM_001160184	Body;Body	chr1:906296-906538	S_Shore			TRUE	0.473267	0.805494	0.332226
cg00380574	37	1	918689	PERM1;PERM1	NM_001291367;NM_001291366	TSS1500;TSS1500	chr1:919726-919927	N_Shore				0.264723	0.605843	0.34112
cg10381813	37	1	918696	C1orf170	NR_027693	TSS1500	chr1:919726-919927	N_Shore			TRUE	0.201282	0.513348	0.312066
cg09332175	37	1	938905				chr1:933387-937410	S_Shore			TRUE	0.443952	0.73959	0.295638
cg13219080	37	1	942161								TRUE	0.327903	0.663694	0.335791
cg17006413	37	1	942451								TRUE	0.54938	0.83518	0.2858
cg21472517	37	1	942471								TRUE	0.474162	0.831832	0.35767
cg18019572	37	1	942489								TRUE	0.325443	0.621571	0.296129
cg22673826	37	1	942498								TRUE	0.379657	0.825536	0.445878
cg01922485	37	1	942696								TRUE	0.362661	0.843029	0.480368
cg26155170	37	1	943064								TRUE	0.343585	0.639632	0.296047
cg08709360	37	1	1003376				chr1:1002663-1005318	Island			TRUE	0.535152	0.794812	0.25966
cg01244934	37	1	1003417				chr1:1002663-1005318	Island			TRUE	0.349993	0.71903	0.369037
cg26111997	37	1	1009281	RNF223	NM_001205252	5'UTR	chr1:1002663-1005318	S_Shelf				0.392821	0.810665	0.417844
cg25646531	37	1	1009741	RNF223	NM_001205252	TSS200	chr1:1011509-1013402	N_Shore				0.32222	0.764738	0.442518
cg13754917	37	1	1010209	RNF223	NM_001205252	TSS1500	chr1:1011509-1013402	N_Shore				0.304693	0.577469	0.272776
cg10168544	37	1	1010769	RNF223	NM_001205252	TSS1500	chr1:1011509-1013402	N_Shore				0.290395	0.550144	0.259749
cg19999567	37	1	1022900	C1orf159	NM_017891	Body	chr1:1023143-1023347	N_Shore			TRUE	0.308763	0.596446	0.287684
cg20961824	37	1	1046086	C1orf159	NM_017891	5'UTR	chr1:1046044-1046340	Island			TRUE	0.43888	0.737232	0.298352
cg08927102	37	1	1050110	C1orf159	NM_017891	5'UTR	chr1:1050515-1050830	N_Shore			TRUE	0.588738	0.928538	0.3398
cg02852398	37	1	1068089								TRUE	0.31425	0.591658	0.277407
cg09661118	37	1	1094764				chr1:1093211-1093476	S_Shore				0.401887	0.902457	0.50057
cg22521151	37	1	1098900				chr1:1098043-1100584	Island			TRUE	0.41294	0.826785	0.413845
cg00207921	37	1	1098992				chr1:1098043-1100584	Island			TRUE	0.2852	0.636519	0.351319
cg20544808	37	1	1099051				chr1:1098043-1100584	Island			TRUE	0.366628	0.817967	0.451339
cg18792131	37	1	1099166				chr1:1098043-1100584	Island			TRUE	0.465249	0.863865	0.398617
cg08090385	37	1	1099583				chr1:1098043-1100584	Island			TRUE	0.411522	0.772614	0.361091
cg08474826	37	1	1099630				chr1:1098043-1100584	Island			TRUE	0.344599	0.708385	0.363786
cg06618740	37	1	1100126				chr1:1098043-1100584	Island			TRUE	0.36874	0.717821	0.349081
cg21475076	37	1	1100493				chr1:1098043-1100584	Island			TRUE	0.341166	0.746227	0.405061
cg16046810	37	1	1140664	TNFRSF18;TNFRSF18;TNFRSF18	NM_148902;NM_004195;NM_148901	Body;Body;Body	chr1:1141670-1142150	N_Shore			TRUE	0.60357	0.887622	0.284051
cg07119157	37	1	1142932	TNFRSF18;TNFRSF18;TNFRSF18	NM_148902;NM_148901;NM_004195	TSS1500;TSS1500;TSS1500	chr1:1141670-1142150	S_Shore			TRUE	0.465522	0.75562	0.290098
cg19862782	37	1	1153924	SDF4;SDF4	NM_016176;NM_016547	Body;Body	chr1:1153784-1154419	Island			TRUE	0.557407	0.840834	0.283427
cg05329510	37	1	1160657	SDF4;SDF4	NM_016176;NM_016547	Body;Body	chr1:1161959-1162281	N_Shore				0.495022	0.863713	0.36869
cg10245314	37	1	1194603	UBE2J2;UBE2J2;LOC100128842;UBE2J2;UBE2J2	NM_194457;NM_194315;NR_027361;NM_194458;NM_058167	Body;Body;Body;Body;Body	chr1:1190522-1190799	S_Shelf			TRUE	0.405092	0.681567	0.276474
cg12631550	37	1	1198509	UBE2J2;UBE2J2;UBE2J2;UBE2J2	NM_194458;NM_194457;NM_058167;NM_194315	Body;Body;Body;Body						0.454433	0.895696	0.441262
cg17645946	37	1	1217455	SCNN1D;SCNN1D	NR_037668;NM_001130413	Body;Body						0.47885	0.80627	0.32742
cg14728174	37	1	1229004	ACAP3	NM_030649	Body	chr1:1228780-1230163	Island				0.505091	0.844237	0.339147
cg03003335	37	1	1229351	ACAP3	NM_030649	Body	chr1:1228780-1230163	Island			TRUE	0.442076	0.701664	0.259589
cg17712416	37	1	1238436	ACAP3	NM_030649	Body	chr1:1242400-1245185	N_Shelf			TRUE	0.501599	0.79512	0.293521
cg25203980	37	1	1238595	ACAP3	NM_030649	Body	chr1:1242400-1245185	N_Shelf			TRUE	0.313232	0.75666	0.443429
cg02953397	37	1	1238678	ACAP3	NM_030649	Body	chr1:1242400-1245185	N_Shelf			TRUE	0.514685	0.806634	0.291949
cg18565510	37	1	1238702	ACAP3	NM_030649	Body	chr1:1242400-1245185	N_Shelf			TRUE	0.44236	0.79315	0.350791
cg27185793	37	1	1238797	ACAP3	NM_030649	Body	chr1:1242400-1245185	N_Shelf			TRUE	0.202385	0.462812	0.260427
cg09556527	37	1	1239259	ACAP3	NM_030649	Body	chr1:1242400-1245185	N_Shelf			TRUE	0.214171	0.558829	0.344658
cg23931819	37	1	1245076	PUSL1	NM_153339	Body	chr1:1242400-1245185	Island			TRUE	0.417027	0.75157	0.334544
cg02506753	37	1	1245184	PUSL1	NM_153339	Body	chr1:1242400-1245185	Island			TRUE	0.312016	0.570811	0.258795
cg05724097	37	1	1245708	PUSL1	NM_153339	Body	chr1:1242400-1245185	S_Shore			TRUE	0.573566	0.8928	0.319234
cg06520508	37	1	1261347	GLTPD1;CPSF3L	NM_001029885;NM_017871	5'UTR;TSS1500	chr1:1262665-1263420	N_Shore			TRUE	0.373614	0.676676	0.303062
cg20705390	37	1	1266178	TAS1R3	NM_152228	TSS1500	chr1:1267085-1267286	N_Shore			TRUE	0.45273	0.705152	0.252423
cg24252805	37	1	1266548	TAS1R3	NM_152228	TSS200	chr1:1267085-1267286	N_Shore			TRUE	0.379668	0.657789	0.278121
cg14890378	37	1	1266652	TAS1R3	NM_152228	TSS200	chr1:1267435-1268986	N_Shore				0.318073	0.6263	0.308227
cg13246026	37	1	1267193	TAS1R3	NM_152228	Body	chr1:1267085-1267286	Island			TRUE	0.352454	0.640718	0.288264
cg21396988	37	1	1267201	TAS1R3	NM_152228	Body	chr1:1267085-1267286	Island			TRUE	0.505558	0.811687	0.306129
cg06802641	37	1	1267252	TAS1R3	NM_152228	Body	chr1:1267085-1267286	Island			TRUE	0.37602	0.725616	0.349595
cg18386618	37	1	1268144	TAS1R3	NM_152228	Body	chr1:1267435-1268986	Island			TRUE	0.35464	0.65726	0.30262
cg00002593	37	1	1268793	TAS1R3	NM_152228	Body	chr1:1267435-1268986	Island			TRUE	0.351908	0.676192	0.324283
cg09569143	37	1	1282740	DVL1	NM_004421	Body	chr1:1283933-1285345	N_Shore				0.603688	0.904397	0.30071
cg00046914	37	1	1299723	MXRA8	NM_001282582	TSS1500						0.343056	0.660508	0.317452
cg02416993	37	1	1299759	MXRA8	NM_001282582	TSS1500						0.350549	0.695318	0.344769
cg07726485	37	1	1299861	MXRA8	NM_001282582	TSS1500						0.44	0.801641	0.361641
cg23377249	37	1	1299875	MXRA8	NM_001282582	TSS1500						0.424292	0.818585	0.394293
cg20435334	37	1	1312097	AURKAIP1	NM_017900	TSS1500	chr1:1309140-1311039	S_Shore				0.586901	0.861314	0.274413
cg26865478	37	1	1312144	AURKAIP1	NM_017900	TSS1500	chr1:1309140-1311039	S_Shore			TRUE	0.541101	0.793465	0.252364
cg17507949	37	1	1355999	LOC441869;LOC441869	NR_026871;NM_001145210	Body;Body	chr1:1355159-1356000	Island			TRUE	0.369945	0.700238	0.330293
cg20598347	37	1	1356852	ANKRD65;ANKRD65;ANKRD65	NM_001145210;NM_001243536;NM_001243535	TSS200;TSS200;TSS200	chr1:1355159-1356000	S_Shore				0.417438	0.670151	0.252712
cg02668764	37	1	1356887	ANKRD65;ANKRD65;ANKRD65	NM_001145210;NM_001243536;NM_001243535	TSS200;TSS200;TSS200	chr1:1355159-1356000	S_Shore				0.383253	0.707672	0.32442
cg15081886	37	1	1356902	LOC441869;LOC441869	NR_026871;NM_001145210	TSS1500;TSS1500	chr1:1355159-1356000	S_Shore			TRUE	0.466173	0.805269	0.339096
cg23537515	37	1	1356921	ANKRD65;ANKRD65;ANKRD65	NM_001145210;NM_001243536;NM_001243535	TSS200;TSS200;TSS200	chr1:1355159-1356000	S_Shore				0.558644	0.860998	0.302353
cg12754273	37	1	1356940	ANKRD65;ANKRD65;ANKRD65	NM_001145210;NM_001243536;NM_001243535	TSS200;TSS200;TSS200	chr1:1355159-1356000	S_Shore				0.360694	0.726174	0.365479
cg21281527	37	1	1357314	ANKRD65;ANKRD65;ANKRD65	NM_001145210;NM_001243536;NM_001243535	TSS1500;TSS1500;TSS1500	chr1:1355159-1356000	S_Shore				0.535349	0.810212	0.274863
cg16496742	37	1	1368387	LOC102724312;LOC102724312;LOC102724312	NR_125994;NR_125995;NR_125996	Body;Body;Body	chr1:1370767-1371449	N_Shelf				0.552295	0.803632	0.251337
cg26394870	37	1	1368541	LOC102724312;LOC102724312;LOC102724312	NR_125994;NR_125995;NR_125996	Body;Body;Body	chr1:1370767-1371449	N_Shelf		chr1:1368471-1368471		0.29045	0.55957	0.269121
cg15310231	37	1	1388050	ATAD3C	NM_001039211	Body	chr1:1389555-1389889	N_Shore				0.431218	0.718418	0.2872
cg19682639	37	1	1391102	ATAD3C	NM_001039211	Body	chr1:1389555-1389889	S_Shore			TRUE	0.347766	0.667335	0.319568
cg17282836	37	1	1397524	ATAD3C	NM_001039211	Body	chr1:1396085-1396338	S_Shore			TRUE	0.344353	0.604731	0.260378
cg11735371	37	1	1413937	ATAD3B	NM_031921	Body	chr1:1414034-1414532	N_Shore			TRUE	0.553157	0.894363	0.341206
cg15844005	37	1	1472079	C1orf70	NM_001114748	Body	chr1:1473107-1473342	N_Shore			TRUE	0.603899	0.856565	0.252666
cg11811409	37	1	1477025	C1orf70	NM_001114748	TSS1500	chr1:1474962-1475220	S_Shore			TRUE	0.479693	0.736699	0.257006
cg09172260	37	1	1536101				chr1:1534331-1536136	Island			TRUE	0.300622	0.57554	0.274918
cg15158067	37	1	1536396	C1orf233	NM_001242659	TSS1500	chr1:1534331-1536136	S_Shore				0.23978	0.579259	0.339479
cg07147033	37	1	1549615	MIB2;MIB2;MIB2;MIB2;MIB2	NM_001170687;NM_001170688;NM_080875;NR_033183;NM_001170686	TSS1500;TSS1500;TSS1500;TSS1500;TSS1500	chr1:1550453-1552015	N_Shore			TRUE	0.224838	0.607045	0.382207
cg13897348	37	1	1549699	MIB2;MIB2;MIB2;MIB2;MIB2	NM_001170687;NM_001170688;NM_080875;NR_033183;NM_001170686	TSS1500;TSS1500;TSS1500;TSS1500;TSS1500	chr1:1550453-1552015	N_Shore			TRUE	0.141258	0.414216	0.272958
cg26295592	37	1	1552224	MIB2;MIB2;MIB2;MIB2;MIB2;MIB2	NR_033183;NM_001170688;NM_080875;NM_001170687;NM_001170686;NM_001170689	Body;Body;Body;Body;Body;5'UTR	chr1:1550453-1552015	S_Shore				0.452618	0.73225	0.279632
cg06002660	37	1	1562745	MIB2;MIB2;MIB2;MIB2;MIB2;MIB2	NM_001170689;NR_033183;NM_001170688;NM_080875;NM_001170687;NM_001170686	Body;Body;Body;Body;Body;Body	chr1:1564421-1570006	N_Shore				0.455172	0.814343	0.359171
cg25900627	37	1	1562767	MIB2;MIB2;MIB2;MIB2;MIB2;MIB2	NM_001170689;NR_033183;NM_001170688;NM_080875;NM_001170687;NM_001170686	Body;Body;Body;Body;Body;Body	chr1:1564421-1570006	N_Shore				0.488492	0.850801	0.362309
cg04854189	37	1	1562771	MIB2;MIB2;MIB2;MIB2;MIB2;MIB2	NM_001170687;NM_001170688;NM_080875;NM_001170689;NM_001170686;NR_033183	Body;Body;Body;Body;Body;Body	chr1:1563674-1564032	N_Shore			TRUE	0.506764	0.861213	0.354449
cg06080300	37	1	1563096	MIB2;MIB2;MIB2;MIB2;MIB2;MIB2	NM_001170687;NM_001170688;NM_080875;NM_001170689;NM_001170686;NR_033183	Body;Body;Body;Body;Body;Body	chr1:1563674-1564032	N_Shore			TRUE	0.508267	0.825004	0.316737
cg09159050	37	1	1563500	MIB2;MIB2;MIB2;MIB2;MIB2;MIB2	NM_001170687;NM_001170688;NM_080875;NM_001170689;NM_001170686;NR_033183	Body;Body;Body;Body;Body;Body	chr1:1563674-1564032	N_Shore			TRUE	0.581228	0.835287	0.254059
cg21129534	37	1	1563695	MIB2;MIB2;MIB2;MIB2;MIB2;MIB2	NM_001170689;NR_033183;NM_001170688;NM_080875;NM_001170687;NM_001170686	Body;Body;Body;Body;Body;Body	chr1:1563674-1564032	Island				0.578884	0.861341	0.282457
cg07328316	37	1	1690235	NADK;NADK;NADK;NADK	NM_001198995;NM_001198994;NM_001198993;NM_023018	TSS200;Body;Body;Body	chr1:1691767-1692063	N_Shore				0.293279	0.645823	0.352545
cg22906442	37	1	1690260	NADK;NADK;NADK;NADK	NM_001198995;NM_001198994;NM_001198993;NM_023018	TSS200;Body;Body;Body	chr1:1691767-1692063	N_Shore				0.249764	0.602582	0.352818
cg08937102	37	1	1690389	NADK	NM_023018	Body	chr1:1691767-1692063	N_Shore			TRUE	0.312004	0.630633	0.318629
cg15274273	37	1	1690610	NADK;NADK;NADK;NADK	NM_001198995;NM_001198994;NM_001198993;NM_023018	TSS1500;Body;Body;Body	chr1:1691767-1692063	N_Shore				0.461008	0.71137	0.250362
cg22376730	37	1	1715039				chr1:1713639-1714141	S_Shore			TRUE	0.474441	0.784041	0.3096
cg26568075	37	1	1718809	GNB1	NM_002074	Body			low-CpG:1708656-1708740		TRUE	0.605044	0.899077	0.294032
cg15523212	37	1	1729345	GNB1;GNB1;GNB1	NM_001282538;NM_002074;NM_001282539	Body;Body;Body						0.399861	0.844091	0.444231
cg01205154	37	1	1767173	GNB1;GNB1;GNB1	NM_001282538;NM_002074;NM_001282539	5'UTR;5'UTR;5'UTR						0.335438	0.787089	0.451651
cg09535746	37	1	1772180	GNB1;GNB1;GNB1	NM_001282538;NM_002074;NM_001282539	5'UTR;5'UTR;5'UTR				chr1:1772108-1772108		0.152279	0.417622	0.265343
cg24706992	37	1	1833078								TRUE	0.368059	0.653796	0.285737
cg00007800	37	1	1838518				chr1:1839958-1840601	N_Shore			TRUE	0.474787	0.767116	0.292328
cg16926213	37	1	1841314				chr1:1839958-1840601	S_Shore			TRUE	0.378409	0.64818	0.269771
cg11549166	37	1	1846098	CALML6	NM_138705	TSS200	chr1:1850098-1851391	N_Shelf			TRUE	0.512754	0.860713	0.347959
cg22364929	37	1	1846154	CALML6	NM_138705	TSS200	chr1:1850098-1851391	N_Shelf			TRUE	0.253565	0.545128	0.291563
cg11649821	37	1	1859438				chr1:1859246-1859523	Island			TRUE	0.465573	0.75953	0.293957
cg07227679	37	1	1861675				chr1:1859246-1859523	S_Shelf			TRUE	0.477953	0.799378	0.321426
cg19630039	37	1	1861806				chr1:1859246-1859523	S_Shelf			TRUE	0.422817	0.680979	0.258162
cg16142957	37	1	1873750				chr1:1874715-1875015	N_Shore			TRUE	0.497495	0.802461	0.304965
cg14839558	37	1	1874488				chr1:1874715-1875015	N_Shore			TRUE	0.39236	0.756967	0.364607
cg21876832	37	1	1874742				chr1:1874715-1875015	Island			TRUE	0.515928	0.818011	0.302084
cg06123252	37	1	1901073	KIAA1751	NM_001080484	Body	chr1:1897581-1897786	S_Shelf			TRUE	0.334808	0.738574	0.403766
cg14223474	37	1	1902224	CFAP74	NM_001304360	Body						0.42249	0.751504	0.329014
cg20285026	37	1	1983774	PRKCZ	NM_002744	Body	chr1:1981251-1983212	S_Shore			TRUE	0.320645	0.593694	0.273049
cg16320749	37	1	2039660	PRKCZ;PRKCZ;PRKCZ;PRKCZ	NM_001033581;NM_001033582;NM_002744;NM_001242874	5'UTR;5'UTR;Body;Body	chr1:2040997-2041302	N_Shore				0.467543	0.71867	0.251127
cg18188739	37	1	2058941	PRKCZ;PRKCZ;PRKCZ	NM_001033582;NM_002744;NM_001033581	5'UTR;Body;5'UTR					TRUE	0.295453	0.556281	0.260829
cg24042578	37	1	2066981	PRKCZ;PRKCZ;PRKCZ	NM_001033582;NM_002744;NM_001033581	5'UTR;Body;5'UTR	chr1:2066367-2066666	S_Shore			TRUE	0.171463	0.472028	0.300565
cg24445388	37	1	2084391	PRKCZ;PRKCZ;PRKCZ	NM_001033581;NM_001033582;NM_002744	Body;Body;Body	chr1:2082314-2082529	S_Shore			TRUE	0.575462	0.864403	0.28894
cg04347414	37	1	2084519	PRKCZ;PRKCZ;PRKCZ	NM_001033581;NM_001033582;NM_002744	Body;Body;Body	chr1:2082314-2082529	S_Shore			TRUE	0.328445	0.607388	0.278943
cg00300046	37	1	2084595	PRKCZ;PRKCZ;PRKCZ	NM_001033581;NM_001033582;NM_002744	Body;Body;Body	chr1:2082314-2082529	S_Shelf			TRUE	0.448184	0.849486	0.401302
cg15468976	37	1	2106222	PRKCZ;PRKCZ;PRKCZ	NM_001033581;NM_001033582;NM_002744	Body;Body;Body					TRUE	0.211868	0.468787	0.256919
cg01150497	37	1	2120978	FAAP20;FAAP20;FAAP20;FAAP20;FAAP20	NM_001256945;NM_001282673;NM_001282671;NM_001282672;NM_001146310	Body;Body;5'UTR;5'UTR;Body	chr1:2121017-2121818	N_Shore				0.0823303	0.394575	0.312245
cg26227225	37	1	2121039	C1orf86;LOC100128003;C1orf86	NM_001146310;NR_024445;NM_182533	Body;Body;3'UTR	chr1:2121017-2121818	Island			TRUE	0.117397	0.459207	0.341811
cg05337761	37	1	2121349	C1orf86;LOC100128003;C1orf86	NM_001146310;NR_024445;NM_182533	Body;Body;Body	chr1:2121017-2121818	Island			TRUE	0.161633	0.523848	0.362216
cg01894875	37	1	2121521	C1orf86;LOC100128003;C1orf86	NM_001146310;NR_024445;NM_182533	Body;Body;Body	chr1:2121017-2121818	Island			TRUE	0.100667	0.438958	0.338291
cg12824877	37	1	2123747	FAAP20;FAAP20;FAAP20;FAAP20;FAAP20;FAAP20;FAAP20;FAAP20;FAAP20;FAAP20	NM_001256945;NM_001282673;NM_001282671;NM_001282672;NR_046427;NM_182533;NM_001256947;NM_001256946;NM_001146310;NM_001282670	Body;Body;5'UTR;5'UTR;Body;Body;Body;3'UTR;Body;Body	chr1:2121017-2121818	S_Shore				0.185478	0.606658	0.42118
cg10314133	37	1	2125114	C1orf86;LOC100128003;C1orf86	NM_001146310;NR_024445;NM_182533	Body;TSS200;Body	chr1:2126048-2126642	N_Shore			TRUE	0.631522	0.912628	0.281106
cg11503104	37	1	2125122	C1orf86;LOC100128003;C1orf86	NM_001146310;NR_024445;NM_182533	Body;TSS200;Body	chr1:2126048-2126642	N_Shore			TRUE	0.486577	0.781641	0.295064
cg08933000	37	1	2125124	C1orf86;LOC100128003;C1orf86	NM_001146310;NR_024445;NM_182533	Body;TSS200;Body	chr1:2126048-2126642	N_Shore			TRUE	0.589582	0.862239	0.272657
cg18397998	37	1	2125243	C1orf86;LOC100128003;C1orf86	NM_001146310;NR_024445;NM_182533	Body;TSS1500;Body	chr1:2126048-2126642	N_Shore			TRUE	0.355228	0.627099	0.271871
cg14984732	37	1	2130495	FAAP20;FAAP20	NM_001282670;NM_001146310	5'UTR;Body	chr1:2126048-2126642	S_Shelf				0.491265	0.74496	0.253695
cg26174216	37	1	2139348	FAAP20;FAAP20	NM_001282670;NM_001146310	5'UTR;TSS200	chr1:2136808-2137351	S_Shore				0.221429	0.49642	0.274991
cg14205402	37	1	2140212	FAAP20;FAAP20	NM_001282670;NM_001146310	5'UTR;TSS1500	chr1:2136808-2137351	S_Shelf		chr1:2140151-2140151		0.300512	0.55844	0.257928
cg04597658	37	1	2142534				chr1:2144199-2144497	N_Shore			TRUE	0.364792	0.835337	0.470545
cg15451548	37	1	2144873				chr1:2144199-2144497	S_Shore			TRUE	0.214214	0.474534	0.260319
cg12526693	37	1	2145258				chr1:2144199-2144497	S_Shore			TRUE	0.306553	0.654254	0.347701
cg26553501	37	1	2145276				chr1:2144199-2144497	S_Shore			TRUE	0.285609	0.606911	0.321302
cg01179713	37	1	2145637	FAAP20	NM_001282670	TSS1500	chr1:2144199-2144497	S_Shore				0.120541	0.463536	0.342996
cg24148368	37	1	2145653	FAAP20	NM_001282670	TSS1500	chr1:2144199-2144497	S_Shore				0.179044	0.551018	0.371973
cg26132097	37	1	2145655	FAAP20	NM_001282670	TSS1500	chr1:2144199-2144497	S_Shore				0.159284	0.544595	0.385311
cg00155685	37	1	2146236				chr1:2144199-2144497	S_Shore				0.269664	0.537089	0.267424
cg08455157	37	1	2152307									0.45011	0.88681	0.4367
cg19463010	37	1	2152330									0.516922	0.904752	0.387829
cg12310543	37	1	2152340									0.327587	0.583189	0.255602
cg08420425	37	1	2170347	SKI	NM_003036	Body						0.36312	0.871009	0.507889
cg05156582	37	1	2171253	SKI	NM_003036	Body					TRUE	0.35679	0.660959	0.304169
cg01776341	37	1	2171879	SKI	NM_003036	Body				chr1:2171824-2171824		0.244272	0.56041	0.316137
cg01748244	37	1	2179352	SKI	NM_003036	Body						0.407689	0.715584	0.307894
cg21800327	37	1	2179358	SKI	NM_003036	Body						0.494309	0.810998	0.316689
cg21442419	37	1	2182373	SKI	NM_003036	Body					TRUE	0.419861	0.717955	0.298094
cg03042633	37	1	2183365	SKI	NM_003036	Body					TRUE	0.251316	0.589183	0.337867
cg07114422	37	1	2183438	SKI	NM_003036	Body					TRUE	0.223961	0.566117	0.342156
cg22166144	37	1	2188349	SKI	NM_003036	Body					TRUE	0.513778	0.890517	0.37674
cg23645210	37	1	2188767	SKI	NM_003036	Body					TRUE	0.288652	0.579074	0.290422
cg08730743	37	1	2189027	SKI	NM_003036	Body					TRUE	0.287133	0.589867	0.302734
cg13781296	37	1	2189699	SKI	NM_003036	Body						0.27749	0.55548	0.27799
cg15798497	37	1	2226301	SKI	NM_003036	Body	chr1:2222198-2222569	S_Shelf				0.327615	0.578367	0.250751
cg26332488	37	1	2230640	SKI	NM_003036	Body	chr1:2232310-2232617	N_Shore			TRUE	0.42098	0.693904	0.272925
cg09556700	37	1	2230668	SKI	NM_003036	Body	chr1:2232310-2232617	N_Shore			TRUE	0.247753	0.544385	0.296632
cg23022809	37	1	2230923	SKI	NM_003036	Body	chr1:2232310-2232617	N_Shore			TRUE	0.131528	0.392947	0.261419
cg26999585	37	1	2235061	SKI	NM_003036	Body	chr1:2236442-2239069	N_Shore				0.409847	0.895957	0.486109
cg12131894	37	1	2257894	MORN1	NM_024848	Body	chr1:2258097-2258423	N_Shore			TRUE	0.342479	0.610081	0.267603
cg08868601	37	1	2258153	MORN1	NM_024848	Body	chr1:2258097-2258423	Island			TRUE	0.589068	0.895762	0.306694
cg14098223	37	1	2262333	MORN1	NM_024848	Body	chr1:2266007-2266432	N_Shelf			TRUE	0.17657	0.437345	0.260776
cg04992757	37	1	2266138	MORN1	NM_024848	Body	chr1:2266007-2266432	Island			TRUE	0.426471	0.692019	0.265547
cg17849542	37	1	2266228	MORN1	NM_024848	Body	chr1:2266007-2266432	Island			TRUE	0.494096	0.839506	0.34541
cg08867908	37	1	2284179	MORN1;LOC100129534	NM_024848;NR_024489	Body;TSS200					TRUE	0.460439	0.875668	0.415229
cg19084427	37	1	2284530	MORN1;LOC100129534	NM_024848;NR_024489	Body;TSS1500					TRUE	0.419617	0.682903	0.263286
cg07087919	37	1	2310084	MORN1	NM_024848	Body					TRUE	0.442097	0.764584	0.322488
cg26876101	37	1	2321877	RER1;MORN1	NM_007033;NM_024848	TSS1500;Body	chr1:2322481-2323764	N_Shore			TRUE	0.314189	0.648768	0.334579
cg27235337	37	1	2334785	RER1	NM_007033	3'UTR	chr1:2333550-2334172	S_Shore			TRUE	0.539224	0.839762	0.300538
cg15733049	37	1	2334974	RER1	NM_007033	3'UTR	chr1:2333550-2334172	S_Shore			TRUE	0.615975	0.897072	0.281097
cg13306335	37	1	2345376	PEX10;PEX10	NM_002617;NM_153818	TSS1500;TSS1500	chr1:2345891-2346156	N_Shore			TRUE	0.386165	0.637633	0.251468
cg01354137	37	1	2359459				chr1:2359926-2360167	N_Shore			TRUE	0.324864	0.619016	0.294152
cg20491328	37	1	2359927				chr1:2359926-2360167	Island			TRUE	0.440187	0.847399	0.407212
cg12715395	37	1	2359968				chr1:2359926-2360167	Island			TRUE	0.436161	0.707033	0.270872
cg19760917	37	1	2411643	PLCH2	NM_014638	Body	chr1:2409757-2410049	S_Shore			TRUE	0.41684	0.672386	0.255547
cg00546248	37	1	2412743	PLCH2	NM_014638	Body	chr1:2411125-2411404	S_Shore			TRUE	0.343678	0.610052	0.266374
cg03847348	37	1	2413705	PLCH2	NM_014638	Body	chr1:2415198-2415506	N_Shore			TRUE	0.415658	0.687023	0.271366
cg25386426	37	1	2459224	PANK4	NM_018216	TSS1500	chr1:2460760-2462010	N_Shore			TRUE	0.404853	0.791398	0.386545
cg27573975	37	1	2463873				chr1:2460760-2462010	S_Shore			TRUE	0.341231	0.627829	0.286598
cg09934343	37	1	2464996				chr1:2466934-2467212	N_Shore				0.327134	0.688332	0.361198
cg10061384	37	1	2466275				chr1:2466934-2467212	N_Shore			TRUE	0.335133	0.626562	0.291429
cg07563069	37	1	2522330	MMEL1;C1orf93	NM_033467;NM_152371	3'UTR;3'UTR	chr1:2517397-2518892	S_Shelf			TRUE	0.412121	0.761667	0.349546
cg19633487	37	1	2522370	MMEL1;C1orf93	NM_033467;NM_152371	3'UTR;3'UTR	chr1:2517397-2518892	S_Shelf			TRUE	0.466658	0.806735	0.340076
cg18932078	37	1	2524107	MMEL1	NM_033467	Body	chr1:2527239-2527503	N_Shelf			TRUE	0.473507	0.815539	0.342032
cg11405194	37	1	2562662	MMEL1	NM_033467	5'UTR	chr1:2559892-2561055	S_Shore				0.538275	0.837099	0.298824
cg14799870	37	1	2563969	MMEL1	NM_033467	5'UTR	chr1:2559892-2561055	S_Shelf				0.551646	0.877931	0.326285
cg02230408	37	1	2722326								TRUE	0.352149	0.684958	0.332809
cg25216300	37	1	2722739								TRUE	0.305612	0.573279	0.267666
cg08832782	37	1	2771967				chr1:2772126-2772665	N_Shore			TRUE	0.281173	0.584715	0.303543
cg13923696	37	1	2772212				chr1:2772126-2772665	Island			TRUE	0.318311	0.647733	0.329421
cg06853416	37	1	2778841				chr1:2777157-2777361	S_Shore			TRUE	0.152229	0.42054	0.268312
cg15579696	37	1	2822706								TRUE	0.172883	0.534787	0.361904
cg05000860	37	1	2823402								TRUE	0.470961	0.741825	0.270864
cg15622619	37	1	2828135				chr1:2827785-2828294	Island			TRUE	0.33494	0.763373	0.428433
cg15515265	37	1	2828198				chr1:2827785-2828294	Island			TRUE	0.372309	0.68195	0.309641
cg23215587	37	1	2842673								TRUE	0.221477	0.510941	0.289464
cg14165772	37	1	2847632				chr1:2847056-2847288	S_Shore			TRUE	0.223301	0.570019	0.346718
cg24412662	37	1	2866667								TRUE	0.411376	0.741569	0.330193
cg23969554	37	1	2979311	FLJ42875	NR_015440	Body	chr1:2979275-2980758	Island			TRUE	0.362898	0.61585	0.252952
cg07523753	37	1	2979582	FLJ42875	NR_015440	Body	chr1:2979275-2980758	Island			TRUE	0.137046	0.392935	0.255889
cg27197651	37	1	2980038	FLJ42875	NR_015440	Body	chr1:2979275-2980758	Island			TRUE	0.162813	0.428265	0.265452
cg05641535	37	1	3026154	PRDM16;PRDM16	NM_022114;NM_199454	Body;Body	chr1:3028179-3028557	N_Shelf			TRUE	0.165079	0.442892	0.277813
cg10021614	37	1	3028910	PRDM16;PRDM16	NM_022114;NM_199454	Body;Body	chr1:3028179-3028557	S_Shore			TRUE	0.630756	0.895011	0.264255
cg27444751	37	1	3029051	PRDM16;PRDM16	NM_022114;NM_199454	Body;Body	chr1:3028179-3028557	S_Shore			TRUE	0.480005	0.763418	0.283414
cg23571820	37	1	3037627	PRDM16;PRDM16	NM_199454;NM_022114	Body;Body	chr1:3038067-3038343	N_Shore				0.512293	0.77264	0.260347
cg00049709	37	1	3057810	PRDM16;PRDM16	NM_022114;NM_199454	Body;Body	chr1:3059050-3059268	N_Shore			TRUE	0.369752	0.637644	0.267892
cg08110058	37	1	3073806	PRDM16;PRDM16	NM_022114;NM_199454	Body;Body	chr1:3071899-3072239	S_Shore			TRUE	0.46152	0.79397	0.332449
cg03391389	37	1	3083061	PRDM16;PRDM16	NM_022114;NM_199454	Body;Body	chr1:3080934-3081292	S_Shore			TRUE	0.205095	0.497964	0.292869
cg05366195	37	1	3102674	PRDM16;PRDM16;PRDM16;PRDM16	NM_199454;NM_022114;NM_199454;NM_022114	ExonBnd;ExonBnd;Body;Body	chr1:3102540-3103352	Island				0.421305	0.783666	0.362361
cg02767788	37	1	3102750	PRDM16;PRDM16	NM_022114;NM_199454	Body;Body	chr1:3102540-3103352	Island			TRUE	0.400035	0.894617	0.494581
cg05952379	37	1	3103048	PRDM16;PRDM16	NM_022114;NM_199454	Body;Body	chr1:3102540-3103352	Island			TRUE	0.354153	0.619168	0.265015
cg13781678	37	1	3103106	PRDM16;PRDM16	NM_022114;NM_199454	Body;Body	chr1:3102540-3103352	Island			TRUE	0.123548	0.463473	0.339925
cg03125480	37	1	3135001	PRDM16;PRDM16	NM_022114;NM_199454	Body;Body					TRUE	0.521165	0.886409	0.365244
cg01777678	37	1	3147329	PRDM16;PRDM16	NM_022114;NM_199454	Body;Body	chr1:3147845-3148081	N_Shore			TRUE	0.487733	0.833842	0.34611
cg22730864	37	1	3161448	PRDM16;PRDM16	NM_022114;NM_199454	Body;Body	chr1:3163969-3164643	N_Shelf			TRUE	0.465447	0.794351	0.328904
cg19704073	37	1	3162159	PRDM16;PRDM16	NM_022114;NM_199454	Body;Body	chr1:3163969-3164643	N_Shore			TRUE	0.271493	0.573115	0.301622
cg16710099	37	1	3162173	PRDM16;PRDM16	NM_022114;NM_199454	Body;Body	chr1:3163969-3164643	N_Shore			TRUE	0.276567	0.548774	0.272207
cg03449456	37	1	3191219	PRDM16;PRDM16	NM_022114;NM_199454	Body;Body					TRUE	0.511546	0.812469	0.300923
cg00329272	37	1	3191481	PRDM16;PRDM16	NM_022114;NM_199454	Body;Body	chr1:3195376-3196052	N_Shelf			TRUE	0.418969	0.684409	0.26544
cg19263228	37	1	3191660	PRDM16;PRDM16	NM_022114;NM_199454	Body;Body	chr1:3195376-3196052	N_Shelf			TRUE	0.314787	0.655897	0.34111
cg17601209	37	1	3191678	PRDM16;PRDM16	NM_022114;NM_199454	Body;Body	chr1:3195376-3196052	N_Shelf			TRUE	0.397284	0.80063	0.403345
cg20988960	37	1	3191815	PRDM16;PRDM16	NM_022114;NM_199454	Body;Body	chr1:3195376-3196052	N_Shelf			TRUE	0.310557	0.721312	0.410754
cg02132535	37	1	3191849	PRDM16;PRDM16	NM_199454;NM_022114	Body;Body	chr1:3195376-3196052	N_Shelf				0.363649	0.807145	0.443496
cg26520908	37	1	3191876	PRDM16;PRDM16	NM_022114;NM_199454	Body;Body	chr1:3195376-3196052	N_Shelf			TRUE	0.361004	0.740423	0.379419
cg14659814	37	1	3209910	PRDM16;PRDM16	NM_022114;NM_199454	Body;Body					TRUE	0.338097	0.631148	0.293051
cg10328768	37	1	3210325	PRDM16;PRDM16	NM_022114;NM_199454	Body;Body					TRUE	0.440948	0.774079	0.333131
cg15605124	37	1	3230250	PRDM16;PRDM16	NM_022114;NM_199454	Body;Body					TRUE	0.188176	0.44656	0.258384
cg14706825	37	1	3289925	PRDM16;PRDM16	NM_199454;NM_022114	Body;Body						0.479428	0.730883	0.251455
cg26537941	37	1	3297162	PRDM16;PRDM16	NM_022114;NM_199454	Body;Body					TRUE	0.413849	0.77593	0.36208
cg10956857	37	1	3308549	PRDM16;PRDM16	NM_022114;NM_199454	Body;Body	chr1:3310102-3311035	N_Shore			TRUE	0.415876	0.718121	0.302245
cg00761129	37	1	3321869	PRDM16;PRDM16	NM_022114;NM_199454	Body;Body	chr1:3321269-3322310	Island			TRUE	0.382719	0.853206	0.470487
cg15644970	37	1	3322363	PRDM16;PRDM16	NM_022114;NM_199454	Body;Body	chr1:3321269-3322310	S_Shore			TRUE	0.45146	0.874895	0.423435
cg00624908	37	1	3327395	PRDM16;PRDM16	NM_022114;NM_199454	Body;Body	chr1:3327991-3329424	N_Shore			TRUE	0.343169	0.704566	0.361397
cg04423188	37	1	3328023	PRDM16;PRDM16	NM_022114;NM_199454	Body;Body	chr1:3327991-3329424	Island			TRUE	0.444506	0.738975	0.294469
cg14841011	37	1	3332125	PRDM16;PRDM16	NM_022114;NM_199454	Body;Body	chr1:3331986-3332227	Island			TRUE	0.236533	0.501957	0.265424
cg22608265	37	1	3351106	PRDM16;PRDM16	NM_199454;NM_022114	3'UTR;3'UTR	chr1:3351365-3351632	N_Shore			TRUE	0.442815	0.704155	0.261339
cg11143876	37	1	3376815	ARHGEF16	NM_014448	5'UTR					TRUE	0.27498	0.532557	0.257576
cg10524745	37	1	3381172	ARHGEF16	NM_014448	Body						0.46916	0.852362	0.383202
cg19366986	37	1	3381321	ARHGEF16	NM_014448	Body					TRUE	0.505207	0.758557	0.25335
cg08711320	37	1	3387932	ARHGEF16	NM_014448	Body					TRUE	0.337246	0.607813	0.270567
cg02328660	37	1	3389744	ARHGEF16	NM_014448	Body					TRUE	0.609497	0.863708	0.254211
cg21001273	37	1	3445720	MEGF6	NM_001409	Body	chr1:3447449-3447950	N_Shore			TRUE	0.451138	0.75975	0.308611
cg20451455	37	1	3449825	MEGF6	NM_001409	Body	chr1:3447449-3447950	S_Shore			TRUE	0.356831	0.709108	0.352276
cg27637706	37	1	3472204	MEGF6	NM_001409	Body					TRUE	0.437902	0.707964	0.270063
cg20707157	37	1	3511964	MEGF6	NM_001409	Body	chr1:3511709-3512118	Island			TRUE	0.456651	0.713779	0.257128
cg23163013	37	1	3606892	TP73;TP73;TP73;TP73	NM_001126240;NM_001126242;NM_005427;NM_001126241	TSS1500;TSS1500;Body;TSS1500	chr1:3607096-3607553	N_Shore			TRUE	0.411338	0.68842	0.277082
cg04493946	37	1	3607097	TP73;TP73;TP73;TP73	NM_005427;NM_001126240;NM_001126241;NM_001126242	Body;TSS200;TSS200;TSS200	chr1:3607096-3607553	Island			TRUE	0.357087	0.679733	0.322646
cg18873878	37	1	3607116	TP73;TP73;TP73;TP73	NM_005427;NM_001126240;NM_001126241;NM_001126242	Body;TSS200;TSS200;TSS200	chr1:3607096-3607553	Island			TRUE	0.303676	0.648914	0.345238
cg27340829	37	1	3607143	TP73;TP73;TP73;TP73;TP73;TP73;TP73;TP73;TP73;TP73;TP73;TP73	NM_001126242;NM_001126241;NM_001126240;NM_001204191;NM_001204190;NM_001204189;NM_001204185;NM_001204186;NM_001204184;NM_005427;NM_001204188;NM_001204187	TSS200;TSS200;TSS200;TSS200;TSS200;TSS200;Body;Body;Body;Body;Body;Body	chr1:3607096-3607553	Island				0.35504	0.824382	0.469342
cg26208930	37	1	3607425	TP73;TP73;TP73;TP73;TP73;TP73;TP73	NM_001126240;NM_005427;NM_001126242;NM_001126241;NM_001126241;NM_001126240;NM_001126242	1stExon;Body;5'UTR;1stExon;5'UTR;5'UTR;1stExon	chr1:3607096-3607553	Island			TRUE	0.375436	0.648506	0.273069
cg03899737	37	1	3615390	TP73;TP73;TP73;TP73	NM_001126240;NM_005427;NM_001126242;NM_001126241	Body;Body;Body;Body					TRUE	0.390827	0.856358	0.465532
cg23234149	37	1	3615561	TP73;TP73;TP73;TP73	NM_001126240;NM_005427;NM_001126242;NM_001126241	Body;Body;Body;Body					TRUE	0.418914	0.751955	0.333041
cg20628743	37	1	3615715	TP73;TP73;TP73;TP73	NM_001126240;NM_005427;NM_001126242;NM_001126241	Body;Body;Body;Body					TRUE	0.553916	0.821239	0.267323
cg03043665	37	1	3615762	TP73;TP73;TP73;TP73	NM_001126240;NM_005427;NM_001126242;NM_001126241	Body;Body;Body;Body					TRUE	0.415261	0.808976	0.393715
cg07045089	37	1	3620218	TP73;TP73;TP73;TP73	NM_001126240;NM_005427;NM_001126242;NM_001126241	Body;Body;Body;Body	chr1:3623318-3623521	N_Shelf		chr1:3620035-3620035	TRUE	0.189705	0.446294	0.256588
cg04523603	37	1	3622085	TP73;TP73;TP73;TP73	NM_001126240;NM_005427;NM_001126242;NM_001126241	Body;Body;Body;Body	chr1:3623318-3623521	N_Shore			TRUE	0.308142	0.570712	0.26257
cg26034538	37	1	3623319	TP73;TP73;TP73;TP73	NM_001126240;NM_005427;NM_001126242;NM_001126241	Body;Body;Body;Body	chr1:3623318-3623521	Island			TRUE	0.449433	0.707841	0.258408
cg05782471	37	1	3623389	TP73;TP73;TP73;TP73	NM_001126240;NM_005427;NM_001126242;NM_001126241	Body;Body;Body;Body	chr1:3623318-3623521	Island			TRUE	0.395572	0.651335	0.255763
cg25406408	37	1	3623500	TP73;TP73;TP73;TP73	NM_001126240;NM_005427;NM_001126242;NM_001126241	Body;Body;Body;Body	chr1:3623318-3623521	Island			TRUE	0.501806	0.808178	0.306372
cg17441982	37	1	3626994	TP73;TP73;TP73;TP73	NM_001126240;NM_005427;NM_001126242;NM_001126241	Body;Body;Body;Body	chr1:3623318-3623521	S_Shelf			TRUE	0.547568	0.847044	0.299476
cg10880759	37	1	3635591	TP73;TP73;TP73;TP73;TP73;TP73;TP73;TP73;TP73;TP73;TP73;TP73;TP73	NM_001204185;NM_001204186;NM_001204184;NM_005427;NM_001204188;NM_001204187;NM_001126242;NM_001126241;NM_001204189;NM_001126240;NM_001204191;NM_001204190;NM_001204192	Body;Body;Body;Body;Body;Body;Body;Body;Body;Body;Body;Body;Body	chr1:3634633-3635101	S_Shore				0.127083	0.458994	0.331911
cg19903298	37	1	3659644	KIAA0495	NM_207306	3'UTR	chr1:3662963-3664085	N_Shelf			TRUE	0.513021	0.80377	0.290749
cg23984080	37	1	3659702	KIAA0495	NM_207306	3'UTR	chr1:3662963-3664085	N_Shelf			TRUE	0.562207	0.862215	0.300008
cg14037182	37	1	3662738	KIAA0495	NM_207306	1stExon	chr1:3662963-3664085	N_Shore			TRUE	0.430383	0.699277	0.268894
cg14210077	37	1	3662964	TP73-AS1;TP73-AS1;TP73-AS1;TP73-AS1;TP73-AS1	NR_033712;NR_033711;NR_033710;NR_033709;NR_033708	Body;Body;Body;Body;Body	chr1:3662963-3664085	Island				0.383932	0.687743	0.303812
cg08471158	37	1	3663103	TP73-AS1;TP73-AS1;TP73-AS1;TP73-AS1;TP73-AS1	NR_033712;NR_033711;NR_033710;NR_033709;NR_033708	Body;Body;Body;Body;Body	chr1:3662963-3664085	Island				0.33851	0.59205	0.25354
cg11253879	37	1	3664522	KIAA0495	NM_207306	TSS1500	chr1:3662963-3664085	S_Shore			TRUE	0.395202	0.763378	0.368176
cg08919846	37	1	3664586	KIAA0495	NM_207306	TSS1500	chr1:3662963-3664085	S_Shore			TRUE	0.512218	0.784994	0.272775
cg17855390	37	1	3693301				chr1:3688553-3689684	S_Shelf			TRUE	0.592514	0.846273	0.25376
cg15655497	37	1	3728518				chr1:3731458-3732015	N_Shelf				0.59356	0.888009	0.294449
cg22157494	37	1	3774827	KIAA0562;DFFB	NM_014704;NM_004402	TSS1500;Body	chr1:3775077-3775369	N_Shore			TRUE	0.208595	0.514937	0.306343
cg06178315	37	1	3774858	KIAA0562;DFFB	NM_014704;NM_004402	TSS1500;Body	chr1:3775077-3775369	N_Shore			TRUE	0.127171	0.383096	0.255925
cg00489772	37	1	3775078	KIAA0562;DFFB	NM_014704;NM_004402	TSS1500;Body	chr1:3775077-3775369	Island			TRUE	0.358783	0.745208	0.386426
cg03921357	37	1	3809431	C1orf174	NM_207356	Body	chr1:3808490-3809236	S_Shore			TRUE	0.279451	0.673833	0.394382
cg27446570	37	1	3809532	C1orf174	NM_207356	Body	chr1:3808490-3809236	S_Shore			TRUE	0.440978	0.883602	0.442624
cg00935967	37	1	3822762	LOC100133612	NR_024455	Body	chr1:3824219-3824456	N_Shore			TRUE	0.438042	0.732937	0.294895
cg15061827	37	1	4015423								TRUE	0.52592	0.847604	0.321684
cg21919036	37	1	4113274									0.577825	0.84697	0.269145
cg00546971	37	1	4207818								TRUE	0.434894	0.84955	0.414655
cg10622019	37	1	4221485				chr1:4221387-4221672	Island			TRUE	0.480731	0.748108	0.267377
cg07425646	37	1	4221616				chr1:4221387-4221672	Island			TRUE	0.294748	0.598556	0.303808
cg17808634	37	1	4275141								TRUE	0.442308	0.801087	0.358778
cg00143909	37	1	4363493									0.334169	0.633447	0.299278
cg00930781	37	1	4660565								TRUE	0.399791	0.761989	0.362198
cg00737943	37	1	4761321	AJAP1;AJAP1	NM_018836;NM_001042478	Body;Body						0.51691	0.799689	0.282779
cg27170935	37	1	5221521									0.357236	0.653772	0.296536
cg07263724	37	1	5356229									0.318376	0.702335	0.383959
cg05570231	37	1	5485333									0.196075	0.468088	0.272013
cg17196109	37	1	5488453									0.445317	0.757717	0.3124
cg11968318	37	1	5561995								TRUE	0.46055	0.730965	0.270416
cg00078121	37	1	5767843									0.329477	0.627995	0.298518
cg26606551	37	1	5817431								TRUE	0.515159	0.828565	0.313406
cg27212548	37	1	5988084	NPHP4;NPHP4;NPHP4;NPHP4	NR_111987;NM_015102;NM_001291594;NM_001291593	Body;Body;5'UTR;5'UTR						0.352667	0.858395	0.505728
cg08259685	37	1	5999553	NPHP4;NPHP4;NPHP4;NPHP4	NR_111987;NM_015102;NM_001291594;NM_001291593	Body;Body;5'UTR;5'UTR						0.35315	0.814106	0.460956
cg22356839	37	1	6011302	NPHP4	NM_015102	Body					TRUE	0.624434	0.910671	0.286236
cg13951223	37	1	6011309	NPHP4	NM_015102	Body					TRUE	0.605944	0.916621	0.310678
cg17200257	37	1	6021963	NPHP4;NPHP4;NPHP4;NPHP4	NR_111987;NM_015102;NM_001291594;NM_001291593	Body;Body;5'UTR;5'UTR						0.476429	0.853151	0.376722
cg07493184	37	1	6048938	NPHP4;NPHP4;NPHP4;NPHP4	NM_015102;NR_111987;NM_001291594;NM_001291593	5'UTR;Body;5'UTR;5'UTR	chr1:6051595-6052955	N_Shelf				0.577652	0.900941	0.323289
cg13614083	37	1	6085872	KCNAB2;KCNAB2	NM_003636;NM_172130	TSS1500;TSS1500	chr1:6086244-6086494	N_Shore			TRUE	0.350404	0.703747	0.353343
cg27298072	37	1	6105944	KCNAB2;KCNAB2	NM_003636;NM_172130	Body;Body					TRUE	0.51442	0.842297	0.327877
cg05450108	37	1	6106046	KCNAB2;KCNAB2;KCNAB2;KCNAB2;KCNAB2;KCNAB2;KCNAB2	NM_001199863;NM_001199862;NM_001199861;NM_003636;NM_172130;NM_001199860;NM_001199862	TSS200;1stExon;Body;Body;Body;Body;5'UTR						0.555558	0.824637	0.269079
cg00813560	37	1	6106358	KCNAB2;KCNAB2	NM_003636;NM_172130	Body;Body					TRUE	0.466499	0.824778	0.358279
cg15731035	37	1	6106539	KCNAB2;KCNAB2	NM_003636;NM_172130	Body;Body					TRUE	0.593493	0.877298	0.283805
cg01184901	37	1	6113023	KCNAB2;KCNAB2;KCNAB2;KCNAB2;KCNAB2;KCNAB2	NM_001199861;NM_003636;NM_172130;NM_001199860;NM_001199863;NM_001199862	Body;Body;Body;Body;5'UTR;Body	chr1:6111609-6111836	S_Shore				0.144957	0.519353	0.374396
cg00678862	37	1	6113057	KCNAB2;KCNAB2;KCNAB2;KCNAB2;KCNAB2;KCNAB2	NM_001199861;NM_003636;NM_172130;NM_001199860;NM_001199863;NM_001199862	Body;Body;Body;Body;5'UTR;Body	chr1:6111609-6111836	S_Shore				0.167552	0.455383	0.287831
cg16603374	37	1	6113068	KCNAB2;KCNAB2	NM_003636;NM_172130	Body;Body	chr1:6111609-6111836	S_Shore			TRUE	0.136238	0.386333	0.250095
cg24446610	37	1	6134338	KCNAB2;KCNAB2	NM_003636;NM_172130	Body;Body	chr1:6131635-6131985	S_Shelf			TRUE	0.615067	0.930784	0.315716
cg20773915	37	1	6171788	CHD5	NM_015557	Body					TRUE	0.382231	0.684143	0.301912
cg26574904	37	1	6185663	CHD5	NM_015557	Body	chr1:6187743-6188235	N_Shelf			TRUE	0.428352	0.70802	0.279668
cg19308227	37	1	6206323	CHD5	NM_015557	Body	chr1:6208716-6209039	N_Shelf			TRUE	0.462319	0.734681	0.272363
cg04199227	37	1	6218084	CHD5	NM_015557	Body						0.282367	0.638471	0.356104
cg06348737	37	1	6316858	GPR153	NM_207370	5'UTR	chr1:6320137-6320942	N_Shelf			TRUE	0.420184	0.728212	0.308028
cg26250989	37	1	6333502	ACOT7;ACOT7;ACOT7;ACOT7	NM_181864;NM_181865;NM_007274;NM_181866	Body;Body;Body;Body					TRUE	0.365099	0.699133	0.334034
cg03961030	37	1	6333796	ACOT7;ACOT7;ACOT7;ACOT7	NM_181864;NM_181865;NM_007274;NM_181866	Body;Body;Body;Body					TRUE	0.612346	0.894594	0.282248
cg24927687	37	1	6336519	ACOT7;ACOT7;ACOT7;ACOT7	NM_181864;NM_181865;NM_007274;NM_181866	Body;Body;Body;Body	chr1:6339948-6340268	N_Shelf		chr1:6336471-6336471	TRUE	0.23164	0.571023	0.339383
cg16034168	37	1	6336711	ACOT7;ACOT7;ACOT7;ACOT7	NM_181864;NM_181865;NM_007274;NM_181866	Body;Body;Body;Body	chr1:6339948-6340268	N_Shelf		chr1:6336471-6336471	TRUE	0.207399	0.524301	0.316901
cg11078128	37	1	6336743	ACOT7;ACOT7;ACOT7;ACOT7	NM_181866;NM_181865;NM_181864;NM_007274	Body;Body;Body;Body	chr1:6339948-6340268	N_Shelf		chr1:6336471-6336471		0.135601	0.467449	0.331849
cg15045949	37	1	6362892	ACOT7;ACOT7;ACOT7;ACOT7	NM_181866;NM_181865;NM_181864;NM_007274	Body;Body;Body;Body				chr1:6362597-6362597		0.494264	0.751435	0.257171
cg15180351	37	1	6385101	ACOT7;ACOT7;ACOT7;ACOT7	NM_181866;NM_181865;NM_181864;NM_007274	Body;Body;Body;Body						0.551321	0.863052	0.31173
cg13549940	37	1	6390053	ACOT7;ACOT7;ACOT7;ACOT7	NM_181864;NM_181865;NM_007274;NM_181866	Body;Body;Body;Body					TRUE	0.169157	0.521644	0.352486
cg18167466	37	1	6390473	ACOT7;ACOT7;ACOT7;ACOT7	NM_181864;NM_181865;NM_007274;NM_181866	Body;Body;Body;Body					TRUE	0.25565	0.680999	0.425349
cg10976772	37	1	6390595	ACOT7;ACOT7;ACOT7;ACOT7	NM_181864;NM_181865;NM_007274;NM_181866	Body;Body;Body;Body					TRUE	0.136539	0.50101	0.36447
cg00081799	37	1	6390793	ACOT7;ACOT7;ACOT7;ACOT7	NM_181864;NM_181865;NM_007274;NM_181866	Body;Body;Body;Body					TRUE	0.387687	0.726523	0.338836
cg16170708	37	1	6390830	ACOT7;ACOT7;ACOT7;ACOT7	NM_181864;NM_181865;NM_007274;NM_181866	Body;Body;Body;Body					TRUE	0.356707	0.805478	0.448771
cg15654590	37	1	6394298	ACOT7;ACOT7;ACOT7;ACOT7	NM_181866;NM_181865;NM_181864;NM_007274	Body;Body;Body;Body						0.317018	0.777823	0.460805
cg16733136	37	1	6404058	ACOT7;ACOT7;ACOT7;ACOT7	NM_181864;NM_181865;NM_007274;NM_181866	Body;Body;Body;Body					TRUE	0.253615	0.552583	0.298967
cg03630917	37	1	6410741	ACOT7;ACOT7;ACOT7;ACOT7	NM_181866;NM_181865;NM_181864;NM_007274	Body;Body;Body;Body						0.388874	0.880053	0.491179
cg23544381	37	1	6412458	ACOT7;ACOT7;ACOT7;ACOT7	NM_181866;NM_181865;NM_181864;NM_007274	Body;Body;Body;Body						0.390646	0.70603	0.315384
cg16434449	37	1	6412541	ACOT7;ACOT7;ACOT7;ACOT7	NM_181866;NM_181865;NM_181864;NM_007274	Body;Body;Body;Body						0.212352	0.470081	0.25773
cg14671927	37	1	6415103	ACOT7;ACOT7;ACOT7;ACOT7	NM_181866;NM_181865;NM_181864;NM_007274	Body;Body;Body;Body						0.535218	0.91245	0.377232
cg13823617	37	1	6421969	ACOT7;ACOT7;ACOT7	NM_181865;NM_181864;NM_007274	TSS1500;Body;Body						0.563488	0.852081	0.288593
cg17150495	37	1	6427657	ACOT7;ACOT7	NM_181864;NM_007274	Body;Body						0.394705	0.87536	0.480655
cg13166018	37	1	6432423	ACOT7;ACOT7	NM_181864;NM_007274	Body;Body						0.508263	0.91137	0.403107
cg16429975	37	1	6445632	ACOT7;ACOT7	NM_007274;NM_181864	Body;1stExon					TRUE	0.366569	0.764835	0.398266
cg03499017	37	1	6445893	ACOT7;ACOT7	NM_181864;NM_007274	TSS200;Body						0.326341	0.580111	0.25377
cg10163234	37	1	6445901	ACOT7;ACOT7	NM_181864;NM_007274	TSS200;Body						0.242686	0.561771	0.319085
cg19056927	37	1	6445909	ACOT7;ACOT7	NM_181864;NM_007274	TSS200;Body						0.155387	0.480613	0.325226
cg06407172	37	1	6445916	ACOT7;ACOT7	NM_181864;NM_007274	TSS200;Body						0.212172	0.577155	0.364983
cg00425213	37	1	6446095	ACOT7;ACOT7	NM_007274;NM_181864	Body;TSS1500					TRUE	0.319079	0.659242	0.340163
cg00777636	37	1	6446216	ACOT7;ACOT7	NM_007274;NM_181864	Body;TSS1500					TRUE	0.508535	0.854317	0.345782
cg02328793	37	1	6446234	ACOT7;ACOT7	NM_007274;NM_181864	Body;TSS1500					TRUE	0.531494	0.837816	0.306321
cg10770046	37	1	6446787	ACOT7;ACOT7	NM_007274;NM_181864	Body;TSS1500					TRUE	0.622456	0.915984	0.293528
cg02726752	37	1	6446795	ACOT7;ACOT7	NM_181864;NM_007274	TSS1500;Body						0.493028	0.828567	0.335538
cg07386626	37	1	6475535	HES2	NM_019089	3'UTR	chr1:6479057-6480938	N_Shelf				0.342571	0.793706	0.451135
cg03255783	37	1	6487540	ESPN	NM_031475	Body	chr1:6484503-6485327	S_Shelf			TRUE	0.363688	0.614448	0.250759
cg13503477	37	1	6497127	ESPN	NM_031475	Body	chr1:6500168-6501130	N_Shelf				0.357888	0.613314	0.255427
cg08489551	37	1	6531260	PLEKHG5;PLEKHG5;PLEKHG5;PLEKHG5;PLEKHG5	NM_001042664;NM_001042665;NM_198681;NM_020631;NM_001042663	Body;Body;Body;Body;Body	chr1:6530536-6531814	Island			TRUE	0.578992	0.890297	0.311305
cg16711332	37	1	6531727	PLEKHG5;PLEKHG5;PLEKHG5;PLEKHG5;PLEKHG5	NM_001042664;NM_001042665;NM_198681;NM_020631;NM_001042663	Body;Body;Body;Body;Body	chr1:6530536-6531814	Island			TRUE	0.465747	0.760748	0.295001
cg07820280	37	1	6532571	PLEKHG5;PLEKHG5;PLEKHG5;PLEKHG5;PLEKHG5	NM_001042664;NM_001042665;NM_198681;NM_020631;NM_001042663	Body;Body;Body;Body;Body	chr1:6530536-6531814	S_Shore			TRUE	0.617618	0.871393	0.253775
cg15090562	37	1	6534449	PLEKHG5;PLEKHG5;PLEKHG5;PLEKHG5;PLEKHG5	NM_001042664;NM_001042665;NM_198681;NM_020631;NM_001042663	Body;Body;Body;Body;Body	chr1:6530536-6531814	S_Shelf			TRUE	0.604987	0.884223	0.279236
cg11432443	37	1	6548491	PLEKHG5;PLEKHG5;PLEKHG5;PLEKHG5	NM_020631;NM_198681;NM_001042664;NM_001042663	5'UTR;Body;5'UTR;Body	chr1:6550083-6551115	N_Shore			TRUE	0.478831	0.880543	0.401712
cg09005171	37	1	6552140	PLEKHG5;PLEKHG5;PLEKHG5;PLEKHG5;PLEKHG5	NM_001265594;NM_020631;NM_001265592;NM_001042663;NM_198681	TSS1500;TSS1500;Body;Body;Body	chr1:6550083-6551115	S_Shore				0.260817	0.525226	0.264409
cg12426313	37	1	6552387	PLEKHG5;PLEKHG5;PLEKHG5	NM_198681;NM_001042663;NM_020631	Body;Body;TSS1500	chr1:6550083-6551115	S_Shore			TRUE	0.492097	0.744191	0.252094
cg00253564	37	1	6552403	PLEKHG5;PLEKHG5;PLEKHG5	NM_198681;NM_001042663;NM_020631	Body;Body;TSS1500	chr1:6550083-6551115	S_Shore			TRUE	0.404783	0.67056	0.265776
cg24332389	37	1	6558085	PLEKHG5;PLEKHG5	NM_198681;NM_001042663	Body;TSS1500	chr1:6557561-6557872	S_Shore			TRUE	0.367443	0.745995	0.378552
cg22451657	37	1	6558088	PLEKHG5;PLEKHG5	NM_198681;NM_001042663	Body;TSS1500	chr1:6557561-6557872	S_Shore			TRUE	0.271369	0.603738	0.332369
cg04601090	37	1	6579837	PLEKHG5;PLEKHG5	NM_198681;NM_198681	5'UTR;1stExon					TRUE	0.253592	0.583115	0.329523
cg18925980	37	1	6580110	PLEKHG5;PLEKHG5	NM_198681;NM_198681	1stExon;5'UTR						0.149856	0.487051	0.337195
cg13857119	37	1	6580308	PLEKHG5	NM_198681	TSS1500					TRUE	0.143051	0.444878	0.301827
cg02600878	37	1	6580311	PLEKHG5	NM_198681	TSS200						0.159646	0.55626	0.396614
cg07408569	37	1	6580387	PLEKHG5	NM_198681	TSS1500						0.167317	0.439711	0.272395
cg06972903	37	1	6580525	PLEKHG5	NM_198681	TSS1500					TRUE	0.227691	0.576016	0.348325
cg00821618	37	1	6581796	NOL9	NM_024654	3'UTR						0.510185	0.777821	0.267636
cg00547365	37	1	6605420	NOL9	NM_024654	Body					TRUE	0.277551	0.558942	0.281391
cg19757108	37	1	6605447	NOL9	NM_024654	Body						0.293367	0.567037	0.27367
cg21877403	37	1	6605464	NOL9	NM_024654	Body						0.398317	0.696933	0.298617
cg07718813	37	1	6640976	ZBTB48	NM_005341	Body	chr1:6639427-6640361	S_Shore			TRUE	0.272553	0.548448	0.275895
cg25222408	37	1	6645094	ZBTB48;ZBTB48;ZBTB48	NM_005341;NM_001278648;NM_001278647	Body;Body;Body						0.530451	0.863809	0.333358
cg02821988	37	1	6645324	ZBTB48;ZBTB48;ZBTB48	NM_005341;NM_001278648;NM_001278647	Body;Body;Body						0.315485	0.619096	0.303611
cg23642826	37	1	6645463	ZBTB48	NM_005341	Body					TRUE	0.361505	0.694001	0.332496
cg05031702	37	1	6646147	ZBTB48;ZBTB48;ZBTB48	NM_005341;NM_001278648;NM_001278647	Body;Body;Body						0.382074	0.821862	0.439788
cg03317152	37	1	6646156	ZBTB48;ZBTB48;ZBTB48	NM_005341;NM_001278648;NM_001278647	Body;Body;Body						0.395532	0.696988	0.301456
cg21706526	37	1	6647232	ZBTB48;ZBTB48;ZBTB48	NM_005341;NM_001278648;NM_001278647	Body;Body;Body						0.563956	0.854229	0.290273
cg09265619	37	1	6659205	KLHL21	NM_014851	Body	chr1:6659125-6659505	Island			TRUE	0.417817	0.737495	0.319677
cg00103568	37	1	6659266	KLHL21	NM_014851	Body	chr1:6659125-6659505	Island			TRUE	0.424836	0.750273	0.325437
cg21899939	37	1	6659353	KLHL21	NM_014851	Body	chr1:6659125-6659505	Island			TRUE	0.411039	0.827611	0.416573
cg14823363	37	1	6659366	KLHL21	NM_014851	Body	chr1:6659125-6659505	Island			TRUE	0.382909	0.67598	0.293071
cg25408172	37	1	6671860				chr1:6672786-6675741	N_Shore				0.372087	0.791063	0.418977
cg19975017	37	1	6683465	PHF13;THAP3	NM_153812;NM_001195753	3'UTR;TSS1500	chr1:6685071-6685691	N_Shore				0.529097	0.893218	0.364121
cg03106413	37	1	6683528	PHF13	NM_153812	3'UTR	chr1:6685071-6685691	N_Shore			TRUE	0.336752	0.690213	0.35346
cg08767412	37	1	6683652	PHF13;THAP3	NM_153812;NM_001195753	3'UTR;TSS1500	chr1:6685071-6685691	N_Shore				0.491438	0.865947	0.374509
cg17232631	37	1	6698033	DNAJC11	NM_018198	Body						0.347801	0.726025	0.378224
cg02993722	37	1	6698457	DNAJC11	NM_018198	Body					TRUE	0.416063	0.780871	0.364808
cg26360953	37	1	6784749								TRUE	0.379615	0.633147	0.253532
cg16833163	37	1	6795889									0.257206	0.567103	0.309897
cg21457573	37	1	6822395									0.379459	0.813956	0.434497
cg05008253	37	1	6830765									0.428104	0.737267	0.309163
cg15994332	37	1	6928587	CAMTA1;CAMTA1;CAMTA1;CAMTA1	NM_001195563;NR_038934;NM_001242701;NM_015215	Body;Body;Body;Body						0.405355	0.837679	0.432324
cg27329109	37	1	6929898	CAMTA1;CAMTA1;CAMTA1;CAMTA1	NM_001195563;NR_038934;NM_001242701;NM_015215	Body;Body;Body;Body						0.469196	0.806428	0.337233
cg08929980	37	1	6978618	CAMTA1	NM_015215	Body						0.23424	0.56196	0.32772
cg27209861	37	1	6978798	CAMTA1	NM_015215	Body						0.401418	0.736191	0.334774
cg24117315	37	1	6988185	CAMTA1	NM_015215	Body					TRUE	0.46535	0.718844	0.253494
cg19936318	37	1	7028279	CAMTA1	NM_015215	Body					TRUE	0.556624	0.829274	0.272651
cg10331119	37	1	7209666	CAMTA1	NM_015215	Body					TRUE	0.3945	0.668436	0.273935
cg19218526	37	1	7306253	CAMTA1	NM_015215	Body						0.434614	0.718789	0.284175
cg25902778	37	1	7323213	CAMTA1	NM_015215	Body						0.347121	0.76558	0.418459
cg02152417	37	1	7326345	CAMTA1	NM_015215	Body					TRUE	0.44209	0.699355	0.257266
cg25072257	37	1	7378150	CAMTA1	NM_015215	Body						0.502643	0.78895	0.286306
cg01760763	37	1	7394432	CAMTA1	NM_015215	Body						0.324016	0.625845	0.30183
cg23972860	37	1	7395024	CAMTA1	NM_015215	Body					TRUE	0.280302	0.567557	0.287255
cg14238785	37	1	7447538	CAMTA1	NM_015215	Body						0.280522	0.616561	0.336039
cg14921239	37	1	7515081	CAMTA1	NM_015215	Body						0.411266	0.772561	0.361295
cg24634746	37	1	7538723	CAMTA1	NM_015215	Body					TRUE	0.460797	0.711826	0.251029
cg05350026	37	1	7551576	CAMTA1	NM_015215	Body				chr1:7551468-7551468		0.293967	0.638812	0.344845
cg07595042	37	1	7552236	CAMTA1	NM_015215	Body						0.470106	0.81107	0.340964
cg03487672	37	1	7646349	CAMTA1	NM_015215	Body						0.366561	0.635667	0.269106
cg08764927	37	1	7844895	PER3;PER3	NM_016831;NM_016831	5'UTR;1stExon	chr1:7843915-7845104	Island			TRUE	0.326554	0.618668	0.292114
cg25514503	37	1	7845070	PER3	NM_016831	Body	chr1:7843915-7845104	Island			TRUE	0.55585	0.899317	0.343467
cg14150803	37	1	8035305	PARK7;PARK7	NM_007262;NM_001123377	Body;Body					TRUE	0.563634	0.835865	0.272231
cg17015260	37	1	8035582	PARK7;PARK7	NM_001123377;NM_007262	Body;Body						0.196947	0.482246	0.2853
cg06409164	37	1	8043215	PARK7;PARK7	NM_001123377;NM_007262	Body;Body						0.303651	0.608454	0.304803
cg12633652	37	1	8063623									0.402081	0.85554	0.453459
cg25978327	37	1	8065039								TRUE	0.145711	0.472261	0.32655
cg01001263	37	1	8066815									0.389484	0.841877	0.452393
cg05784329	37	1	8066925									0.366211	0.675061	0.30885
cg24848542	37	1	8066976									0.52388	0.905224	0.381344
cg15676711	37	1	8072453	ERRFI1	NM_018948	3'UTR					TRUE	0.524884	0.886785	0.361901
cg14178899	37	1	8076599	ERRFI1	NM_018948	5'UTR					TRUE	0.504866	0.763501	0.258635
cg00768179	37	1	8083892	ERRFI1	NM_018948	5'UTR	chr1:8085554-8086854	N_Shore			TRUE	0.472047	0.783286	0.311239
cg01889893	37	1	8085193	ERRFI1	NM_018948	5'UTR	chr1:8085554-8086854	N_Shore			TRUE	0.248534	0.572499	0.323964
cg21133328	37	1	8116328									0.317978	0.59643	0.278452
cg02050925	37	1	8233975									0.393181	0.801988	0.408807
cg12749164	37	1	8262925								TRUE	0.593755	0.867477	0.273722
cg05541036	37	1	8279730				chr1:8277195-8277822	S_Shore				0.276389	0.571154	0.294765
cg17174605	37	1	8353321									0.332527	0.720271	0.387744
cg19996304	37	1	8353374									0.648385	0.93394	0.285555
cg21545013	37	1	8407891				chr1:8403697-8404102	S_Shelf			TRUE	0.597909	0.852981	0.255072
cg03989270	37	1	8412158								TRUE	0.325959	0.726661	0.400702
cg01329153	37	1	8417399	RERE;RERE;RERE	NM_001042682;NM_012102;NM_001042681	Body;Body;Body	chr1:8418322-8418857	N_Shore			TRUE	0.399913	0.782166	0.382253
cg13081009	37	1	8430745	RERE;RERE;RERE	NM_001042682;NM_012102;NM_001042681	5'UTR;Body;Body					TRUE	0.298223	0.553916	0.255694
cg15732724	37	1	8434050	RERE;RERE;RERE	NM_001042682;NM_001042681;NM_012102	5'UTR;Body;Body						0.365237	0.681839	0.316602
cg25484577	37	1	8472781	RERE;RERE;RERE	NM_001042682;NM_001042681;NM_012102	5'UTR;Body;Body						0.446126	0.784154	0.338028
cg04317648	37	1	8485376	LOC102724552;RERE;RERE	NR_125999;NM_001042681;NM_012102	Body;Body;Body	chr1:8483389-8484339	S_Shore				0.52436	0.82685	0.30249
cg24536965	37	1	8492032	RERE;RERE	NM_012102;NM_001042681	Body;Body					TRUE	0.558587	0.880169	0.321583
cg23209606	37	1	8515930	RERE;RERE	NM_012102;NM_001042681	Body;Body					TRUE	0.458779	0.727881	0.269102
cg19477209	37	1	8516516	RERE;RERE	NM_001042681;NM_012102	Body;Body						0.184445	0.460356	0.275911
cg27561786	37	1	8525010	RERE;RERE	NM_012102;NM_001042681	Body;Body					TRUE	0.64799	0.904832	0.256842
cg24276315	37	1	8543236	RERE;RERE	NM_001042681;NM_012102	Body;Body						0.223704	0.637606	0.413902
cg25093661	37	1	8587175	RERE;RERE	NM_001042681;NM_012102	Body;Body						0.155204	0.420918	0.265715
cg06159269	37	1	8767347	RERE;RERE	NM_012102;NM_001042681	5'UTR;5'UTR	chr1:8763005-8763549	S_Shelf			TRUE	0.203705	0.478622	0.274918
cg19077570	37	1	8793519	RERE;RERE	NM_001042681;NM_012102	5'UTR;5'UTR						0.478842	0.910697	0.431856
cg20263853	37	1	8824177	RERE;RERE	NM_012102;NM_001042681	5'UTR;5'UTR					TRUE	0.595474	0.882381	0.286907
cg27449041	37	1	8850306	RERE;RERE	NM_012102;NM_001042681	5'UTR;5'UTR					TRUE	0.342631	0.701391	0.35876
cg09788030	37	1	8914860									0.338164	0.625652	0.287488
cg21225029	37	1	8931734	ENO1;ENO1	NM_001201483;NM_001428	TSS200;Body						0.509332	0.784051	0.274719
cg21133140	37	1	8931754	ENO1;ENO1	NM_001201483;NM_001428	TSS200;Body						0.386045	0.649129	0.263084
cg15867712	37	1	8932359	ENO1;ENO1	NM_001201483;NM_001428	TSS1500;Body						0.581617	0.850439	0.268822
cg04993279	37	1	8940460				chr1:8938098-8939409	S_Shore			TRUE	0.226019	0.491787	0.265768
cg23187094	37	1	8963311									0.471047	0.813616	0.342568
cg10207928	37	1	8963950								TRUE	0.255927	0.517806	0.261879
cg26738034	37	1	8964112							chr1:8964053-8964053		0.191342	0.57908	0.387737
cg24325712	37	1	8965799									0.34219	0.667652	0.325462
cg12717664	37	1	9003178									0.471757	0.883179	0.411422
cg14961476	37	1	9130738	SLC2A5;SLC2A5;SLC2A5	NM_001135585;NR_024180;NM_003039	TSS1500;Body;TSS1500	chr1:9131602-9131909	N_Shore			TRUE	0.390703	0.86286	0.472157
cg01800148	37	1	9130886	SLC2A5;SLC2A5;SLC2A5	NM_001135585;NR_024180;NM_003039	TSS1500;Body;TSS1500	chr1:9131602-9131909	N_Shore			TRUE	0.452984	0.7817	0.328717
cg21376058	37	1	9131028	SLC2A5;SLC2A5	NM_001135585;NM_003039	TSS1500;TSS1500	chr1:9131602-9131909	N_Shore				0.590231	0.905807	0.315576
cg02289343	37	1	9131622	SLC2A5	NR_024180	Body	chr1:9131602-9131909	Island			TRUE	0.424309	0.778109	0.353799
cg23837625	37	1	9139306									0.363749	0.744897	0.381148
cg08229716	37	1	9146291									0.463694	0.865602	0.401908
cg16201634	37	1	9146357									0.299508	0.608665	0.309157
cg09107224	37	1	9146369									0.366918	0.734821	0.367903
cg23737366	37	1	9149026	SLC2A5	NR_024180	TSS1500					TRUE	0.395344	0.647498	0.252153
cg09034971	37	1	9159766									0.361428	0.650721	0.289293
cg25003147	37	1	9187683	GPR157	NM_024980	Body	chr1:9188503-9189743	N_Shore			TRUE	0.282835	0.597037	0.314202
cg03583311	37	1	9187976	GPR157	NM_024980	Body	chr1:9188503-9189743	N_Shore			TRUE	0.190148	0.586554	0.396406
cg16819780	37	1	9292137				chr1:9294401-9295118	N_Shelf				0.380976	0.80077	0.419794
cg02276314	37	1	9301104	H6PD	NM_004285	5'UTR					TRUE	0.345468	0.652566	0.307098
cg23530232	37	1	9302240	H6PD;H6PD	NM_004285;NM_001282587	5'UTR;Body						0.429539	0.909116	0.479578
cg06746826	37	1	9305318	H6PD;H6PD	NM_001282587;NM_004285	Body;Body						0.660279	0.92699	0.266711
cg14094793	37	1	9307731	H6PD	NM_004285	Body					TRUE	0.586394	0.901494	0.3151
cg11150353	37	1	9308197	H6PD	NM_004285	Body					TRUE	0.439903	0.844156	0.404254
cg09025327	37	1	9309004	H6PD	NM_004285	Body					TRUE	0.296537	0.613652	0.317115
cg04092003	37	1	9309889	H6PD;H6PD	NM_001282587;NM_004285	Body;Body						0.374306	0.893517	0.519212
cg17805199	37	1	9310257	H6PD	NM_004285	Body					TRUE	0.527285	0.836228	0.308943
cg08998747	37	1	9330474	H6PD;H6PD	NM_004285;NM_001282587	3'UTR;3'UTR						0.570388	0.832164	0.261777
cg23606162	37	1	9342018								TRUE	0.283177	0.729075	0.445898
cg06899522	37	1	9355438	SPSB1	NM_025106	5'UTR					TRUE	0.272432	0.580173	0.307741
cg12221621	37	1	9381317	SPSB1	NM_025106	5'UTR					TRUE	0.479446	0.842777	0.36333
cg03116948	37	1	9381431	SPSB1	NM_025106	5'UTR					TRUE	0.468272	0.825716	0.357443
cg10545065	37	1	9400171	SPSB1	NM_025106	5'UTR						0.50162	0.8366	0.33498
cg03355970	37	1	9402481	SPSB1	NM_025106	5'UTR						0.365517	0.865011	0.499493
cg09249036	37	1	9430190				chr1:9427507-9427734	S_Shelf				0.357588	0.671031	0.313442
cg16850478	37	1	9444934									0.248382	0.580682	0.332301
cg23008453	37	1	9445612									0.512834	0.902305	0.389471
cg26045764	37	1	9458033									0.477	0.729239	0.252239
cg04949734	37	1	9464633									0.404652	0.909873	0.505221
cg04701785	37	1	9464735									0.294448	0.673147	0.3787
cg09364316	37	1	9465696									0.397393	0.902752	0.50536
cg16295156	37	1	9466328								TRUE	0.543355	0.83742	0.294065
cg03487019	37	1	9479540									0.427301	0.715095	0.287794
cg16297649	37	1	9496568									0.555044	0.811886	0.256842
cg23165512	37	1	9498344									0.321968	0.597636	0.275668
cg10992465	37	1	9504049								TRUE	0.390717	0.81578	0.425062
cg21686171	37	1	9504429							chr1:9504221-9504221	TRUE	0.391023	0.907609	0.516585
cg11231958	37	1	9509421								TRUE	0.271722	0.589622	0.3179
cg06430045	37	1	9535218							chr1:9535183-9535183		0.306197	0.644253	0.338056
cg16740886	37	1	9593025									0.524307	0.816204	0.291898
cg26607031	37	1	9602701	SLC25A33	NM_032315	Body	chr1:9599350-9600444	S_Shelf			TRUE	0.120763	0.395203	0.27444
cg06754493	37	1	9615629	SLC25A33	NM_032315	Body						0.324998	0.69714	0.372143
cg13385114	37	1	9656493	TMEM201;TMEM201	NM_001130924;NM_001010866	Body;Body					TRUE	0.307771	0.589993	0.282222
cg24859236	37	1	9750213	PIK3CD	NM_005026	5'UTR	chr1:9749295-9750228	Island			TRUE	0.29175	0.547445	0.255695
cg24760690	37	1	9835810	CLSTN1;CLSTN1;CLSTN1	NM_014944;NM_001302883;NM_001009566	Body;Body;Body						0.545352	0.933903	0.388551
cg09252461	37	1	9856915	CLSTN1;CLSTN1;CLSTN1	NM_014944;NM_001302883;NM_001009566	Body;Body;Body						0.332867	0.662634	0.329767
cg23632178	37	1	9865398	CLSTN1;CLSTN1;CLSTN1	NM_014944;NM_001302883;NM_001009566	Body;Body;Body						0.479203	0.808157	0.328953
cg25352208	37	1	9867673	CLSTN1;CLSTN1;CLSTN1	NM_014944;NM_001302883;NM_001009566	Body;Body;Body						0.484496	0.926203	0.441707
cg23259527	37	1	9868377	CLSTN1;CLSTN1	NM_001009566;NM_014944	Body;Body					TRUE	0.396062	0.862166	0.466104
cg04570362	37	1	9871402	CLSTN1;CLSTN1	NM_001009566;NM_014944	Body;Body					TRUE	0.487967	0.763649	0.275682
cg23261073	37	1	9880771	CLSTN1;CLSTN1	NM_001009566;NM_014944	Body;Body	chr1:9883011-9884667	N_Shelf			TRUE	0.578295	0.88692	0.308625
cg00123104	37	1	9884732	CLSTN1;CLSTN1	NM_014944;NM_001009566	TSS200;TSS200	chr1:9883011-9884667	S_Shore			TRUE	0.0677685	0.325475	0.257707
cg21117808	37	1	9887936				chr1:9883011-9884667	S_Shelf			TRUE	0.267084	0.734062	0.466978
cg13871843	37	1	9887984				chr1:9883011-9884667	S_Shelf			TRUE	0.305213	0.803417	0.498205
cg14037769	37	1	9895799								TRUE	0.237909	0.598055	0.360146
cg20488341	37	1	9896309								TRUE	0.314494	0.801094	0.486599
cg13361909	37	1	9897170									0.473779	0.863309	0.38953
cg21039767	37	1	9900523									0.282495	0.62573	0.343235
cg04401067	37	1	9902439								TRUE	0.218865	0.554938	0.336074
cg22861669	37	1	9904386								TRUE	0.192542	0.457895	0.265353
cg09282982	37	1	9929976	CTNNBIP1;CTNNBIP1	NM_020248;NM_001012329	Body;Body						0.419758	0.892805	0.473048
cg05216096	37	1	9932407	CTNNBIP1;CTNNBIP1	NM_020248;NM_001012329	5'UTR;5'UTR						0.510456	0.851401	0.340945
cg12325086	37	1	9932825	CTNNBIP1;CTNNBIP1	NM_020248;NM_001012329	5'UTR;5'UTR						0.485634	0.849273	0.363639
cg12187160	37	1	9933026	CTNNBIP1;CTNNBIP1	NM_020248;NM_001012329	5'UTR;5'UTR						0.401229	0.851678	0.450449
cg12814199	37	1	9935516	CTNNBIP1;CTNNBIP1	NM_020248;NM_001012329	5'UTR;5'UTR					TRUE	0.33135	0.651307	0.319957
cg25489300	37	1	9938182	CTNNBIP1;CTNNBIP1	NM_020248;NM_001012329	5'UTR;5'UTR						0.357113	0.63633	0.279218
cg04545731	37	1	9938289	CTNNBIP1;CTNNBIP1	NM_020248;NM_001012329	5'UTR;5'UTR						0.353653	0.700937	0.347284
cg25806353	37	1	9938359	CTNNBIP1;CTNNBIP1	NM_020248;NM_001012329	5'UTR;5'UTR						0.304989	0.74184	0.436851
cg15460536	37	1	9938595	CTNNBIP1;CTNNBIP1	NM_020248;NM_001012329	5'UTR;5'UTR						0.503149	0.889902	0.386754
cg09146155	37	1	9946347	CTNNBIP1;CTNNBIP1	NM_020248;NM_001012329	5'UTR;5'UTR						0.50045	0.869479	0.369029
cg16673088	37	1	9946604	CTNNBIP1;CTNNBIP1	NM_020248;NM_001012329	5'UTR;5'UTR						0.49724	0.924482	0.427241
cg16578549	37	1	9950732	CTNNBIP1;CTNNBIP1	NM_020248;NM_001012329	5'UTR;5'UTR					TRUE	0.383807	0.770362	0.386555
cg22423930	37	1	9953177	CTNNBIP1;CTNNBIP1	NM_020248;NM_001012329	5'UTR;5'UTR						0.288683	0.59694	0.308258
cg06820852	37	1	9953301	CTNNBIP1;CTNNBIP1	NM_020248;NM_001012329	5'UTR;5'UTR						0.438875	0.690034	0.251159
cg12820913	37	1	9953939	CTNNBIP1;CTNNBIP1	NM_020248;NM_001012329	5'UTR;5'UTR						0.351402	0.643241	0.291839
cg27118196	37	1	9954275	CTNNBIP1;CTNNBIP1	NM_020248;NM_001012329	5'UTR;5'UTR						0.416237	0.843334	0.427097
cg12935715	37	1	9960466	CTNNBIP1;CTNNBIP1	NM_020248;NM_001012329	5'UTR;5'UTR						0.324132	0.701795	0.377663
cg11665263	37	1	9960532	CTNNBIP1;CTNNBIP1	NM_020248;NM_001012329	5'UTR;5'UTR				chr1:9960528-9960528		0.260379	0.5497	0.28932
cg05408966	37	1	9961760	CTNNBIP1;CTNNBIP1	NM_020248;NM_001012329	5'UTR;5'UTR						0.452941	0.830868	0.377927
cg02833588	37	1	9967849	CTNNBIP1;CTNNBIP1	NM_020248;NM_001012329	5'UTR;5'UTR	chr1:9969845-9970063	N_Shore			TRUE	0.295464	0.613472	0.318008
cg11544657	37	1	9968130	CTNNBIP1;CTNNBIP1	NM_020248;NM_001012329	5'UTR;5'UTR	chr1:9969845-9970063	N_Shore			TRUE	0.433921	0.879807	0.445886
cg14348930	37	1	10053979				chr1:10057121-10058108	N_Shelf				0.313246	0.660618	0.347372
cg03649796	37	1	10106565	UBE4B;UBE4B	NM_006048;NM_001105562	Body;Body					TRUE	0.258036	0.568546	0.31051
cg21237110	37	1	10131943	UBE4B;UBE4B	NM_001105562;NM_006048	Body;Body						0.353085	0.908685	0.5556
cg09508311	37	1	10135623	UBE4B;UBE4B	NM_001105562;NM_006048	Body;Body						0.476588	0.743559	0.266971
cg10125465	37	1	10169029	UBE4B;UBE4B	NM_006048;NM_001105562	Body;Body					TRUE	0.568054	0.878851	0.310797
cg22872164	37	1	10188666	UBE4B;UBE4B	NM_001105562;NM_006048	Body;Body						0.425303	0.676089	0.250786
cg19092837	37	1	10271724	KIF1B;KIF1B	NM_015074;NM_183416	5'UTR;5'UTR	chr1:10270015-10271306	S_Shore			TRUE	0.11575	0.39463	0.27888
cg00891184	37	1	10272185	KIF1B;KIF1B	NM_015074;NM_183416	5'UTR;5'UTR	chr1:10270015-10271306	S_Shore			TRUE	0.306	0.626899	0.320899
cg03534684	37	1	10447997									0.10332	0.370893	0.267573
cg00147627	37	1	10455147				chr1:10458548-10459997	N_Shelf			TRUE	0.537109	0.787477	0.250368
cg05764176	37	1	10484371									0.138548	0.415979	0.277431
cg07894717	37	1	10508598	APITD1;CORT	NM_198544;NM_001302	Body;TSS1500					TRUE	0.518095	0.895229	0.377133
cg07361747	37	1	10516255									0.40868	0.789083	0.380404
cg26188934	37	1	10517936									0.25434	0.633955	0.379615
cg22747962	37	1	10518174									0.232554	0.504974	0.27242
cg15592740	37	1	10518183									0.20339	0.474089	0.270699
cg22715764	37	1	10556294	PEX14	NM_004565	Body				chr1:10556105-10556105	TRUE	0.328121	0.814494	0.486372
cg27571230	37	1	10557258	PEX14	NM_004565	Body				chr1:10557233-10557233		0.43135	0.70994	0.27859
cg04254468	37	1	10567470	PEX14	NM_004565	Body						0.334147	0.654191	0.320045
cg13553120	37	1	10577460	PEX14	NM_004565	Body						0.384923	0.828842	0.443919
cg12944311	37	1	10659906	PEX14	NM_004565	Body						0.466847	0.88569	0.418843
cg07555102	37	1	10696066				chr1:10698299-10698910	N_Shelf			TRUE	0.407722	0.816372	0.408651
cg00145904	37	1	10697703	CASZ1	NM_001079843	3'UTR	chr1:10698299-10698910	N_Shore			TRUE	0.339919	0.591268	0.251349
cg22849913	37	1	10700512	CASZ1	NM_001079843	Body	chr1:10702136-10702340	N_Shore		chr1:10700424-10700424		0.255847	0.561885	0.306039
cg06377684	37	1	10700647	CASZ1	NM_001079843	Body	chr1:10702136-10702340	N_Shore			TRUE	0.281489	0.650884	0.369396
cg09118017	37	1	10704886	CASZ1	NM_001079843	Body	chr1:10707810-10708140	N_Shelf			TRUE	0.601988	0.874616	0.272628
cg16401490	37	1	10704953	CASZ1	NM_001079843	Body	chr1:10707810-10708140	N_Shelf			TRUE	0.676299	0.933931	0.257632
cg07974958	37	1	10707454	CASZ1;CASZ1	NM_017766;NM_001079843	3'UTR;Body	chr1:10707810-10708140	N_Shore			TRUE	0.472235	0.893322	0.421087
cg20318235	37	1	10707917	CASZ1;CASZ1	NM_017766;NM_001079843	Body;Body	chr1:10707810-10708140	Island			TRUE	0.288908	0.761708	0.4728
cg21787835	37	1	10707934	CASZ1;CASZ1	NM_017766;NM_001079843	Body;Body	chr1:10707810-10708140	Island			TRUE	0.449476	0.876037	0.426561
cg03962214	37	1	10707953	CASZ1;CASZ1	NM_017766;NM_001079843	Body;Body	chr1:10707810-10708140	Island			TRUE	0.390224	0.796457	0.406233
cg02172466	37	1	10708003	CASZ1;CASZ1	NM_017766;NM_001079843	Body;Body	chr1:10707810-10708140	Island			TRUE	0.405049	0.879243	0.474194
cg04998589	37	1	10708091	CASZ1;CASZ1	NM_017766;NM_001079843	Body;Body	chr1:10707810-10708140	Island			TRUE	0.503137	0.837776	0.334639
cg26427827	37	1	10713944	CASZ1;CASZ1	NM_017766;NM_001079843	Body;Body	chr1:10713838-10714203	Island			TRUE	0.509878	0.842832	0.332954
cg11800379	37	1	10715885	CASZ1;CASZ1	NM_017766;NM_001079843	Body;Body	chr1:10713838-10714203	S_Shore			TRUE	0.503631	0.812078	0.308446
cg10221299	37	1	10726094	CASZ1;CASZ1	NM_001079843;NM_017766	Body;Body	chr1:10725187-10725617	S_Shore		chr1:10726049-10726049		0.334104	0.66347	0.329366
cg04899446	37	1	10739980	CASZ1;CASZ1	NM_017766;NM_001079843	Body;Body					TRUE	0.281028	0.559668	0.27864
cg04896832	37	1	10745727	CASZ1;CASZ1	NM_017766;NM_001079843	Body;Body					TRUE	0.342902	0.636143	0.29324
cg07985864	37	1	10757892	CASZ1;CASZ1	NM_001079843;NM_017766	5'UTR;5'UTR	chr1:10757891-10758252	Island			TRUE	0.363949	0.797791	0.433842
cg02634861	37	1	10757954	CASZ1;CASZ1	NM_001079843;NM_017766	5'UTR;5'UTR	chr1:10757891-10758252	Island			TRUE	0.474813	0.837152	0.36234
cg09017718	37	1	10758995	CASZ1;CASZ1	NM_001079843;NM_017766	5'UTR;5'UTR	chr1:10757891-10758252	S_Shore			TRUE	0.413615	0.875784	0.462169
cg14768598	37	1	10760569	CASZ1;CASZ1	NM_001079843;NM_017766	5'UTR;5'UTR	chr1:10757891-10758252	S_Shelf				0.332047	0.616979	0.284932
cg24661860	37	1	10784363	CASZ1;CASZ1	NM_001079843;NM_017766	5'UTR;5'UTR					TRUE	0.356708	0.620147	0.263439
cg12804772	37	1	10801612	CASZ1;CASZ1	NM_001079843;NM_017766	5'UTR;5'UTR						0.353395	0.747307	0.393912
cg09511724	37	1	10804939	CASZ1;CASZ1	NM_001079843;NM_017766	5'UTR;5'UTR				chr1:10804844-10804844	TRUE	0.598554	0.887691	0.289137
cg25618916	37	1	10825554	CASZ1;CASZ1	NM_001079843;NM_017766	5'UTR;5'UTR					TRUE	0.262864	0.56511	0.302246
cg01550887	37	1	10825570	CASZ1;CASZ1	NM_001079843;NM_017766	5'UTR;5'UTR						0.480894	0.901036	0.420142
cg17932607	37	1	10826507	CASZ1;CASZ1	NM_001079843;NM_017766	5'UTR;5'UTR						0.484539	0.736804	0.252265
cg06278549	37	1	10826654	CASZ1;CASZ1	NM_001079843;NM_017766	5'UTR;5'UTR						0.418301	0.771733	0.353432
cg09692769	37	1	10836110	CASZ1;CASZ1	NM_001079843;NM_017766	5'UTR;5'UTR						0.532305	0.809175	0.27687
cg09270672	37	1	10836536	CASZ1;CASZ1	NM_001079843;NM_017766	5'UTR;5'UTR						0.250238	0.575041	0.324804
cg26689934	37	1	10839502	CASZ1;CASZ1	NM_001079843;NM_017766	5'UTR;5'UTR					TRUE	0.387582	0.76156	0.373979
cg25463742	37	1	10839574	CASZ1;CASZ1	NM_001079843;NM_017766	5'UTR;5'UTR					TRUE	0.423062	0.716419	0.293357
cg04842880	37	1	10847541	CASZ1;CASZ1	NM_001079843;NM_017766	5'UTR;5'UTR					TRUE	0.570137	0.823793	0.253656
cg04622001	37	1	10847594	CASZ1;CASZ1	NM_001079843;NM_017766	5'UTR;5'UTR					TRUE	0.34169	0.805526	0.463836
cg11956902	37	1	10863485									0.286868	0.577387	0.290519
cg08880410	37	1	10878731									0.383233	0.771265	0.388032
cg15925745	37	1	10884864									0.39483	0.728224	0.333394
cg04944659	37	1	10891531								TRUE	0.398485	0.681226	0.282742
cg00883598	37	1	10897596				chr1:10895895-10896117	S_Shore				0.43954	0.693758	0.254218
cg26027690	37	1	10917391								TRUE	0.32143	0.665153	0.343723
cg02073122	37	1	10960517							chr1:10960432-10960432		0.357755	0.74783	0.390075
cg25013303	37	1	10961257								TRUE	0.200284	0.459915	0.259631
cg05644049	37	1	11118880	SRM	NM_003132	Body	chr1:11119030-11120634	N_Shore			TRUE	0.369685	0.62617	0.256485
cg04844344	37	1	11128350	EXOSC10;EXOSC10	NM_002685;NM_001001998	Body;Body						0.562918	0.856671	0.293753
cg07043613	37	1	11128352	EXOSC10;EXOSC10	NM_002685;NM_001001998	Body;Body						0.65442	0.936885	0.282465
cg13390370	37	1	11128373	EXOSC10;EXOSC10	NM_002685;NM_001001998	Body;Body						0.56151	0.90984	0.348329
cg13779682	37	1	11131308	EXOSC10;EXOSC10	NM_002685;NM_001001998	Body;Body						0.570774	0.826272	0.255498
cg07057240	37	1	11141125	EXOSC10;EXOSC10;EXOSC10;EXOSC10	NM_002685;NM_001001998;NM_002685;NM_001001998	Body;Body;ExonBnd;ExonBnd						0.45551	0.92769	0.47218
cg22941759	37	1	11141285	EXOSC10;EXOSC10;EXOSC10;EXOSC10	NM_002685;NM_001001998;NM_002685;NM_001001998	ExonBnd;ExonBnd;Body;Body						0.481623	0.874503	0.39288
cg11750962	37	1	11194678	MTOR	NM_004958	Body					TRUE	0.26455	0.575317	0.310767
cg20406843	37	1	11206028	MTOR-AS1;MTOR	NR_046600;NM_004958	Body;Body						0.621112	0.919063	0.297951
cg16118379	37	1	11207707	MTOR	NM_004958	Body					TRUE	0.483822	0.742106	0.258284
cg13204189	37	1	11377073							chr1:11376903-11376903		0.264227	0.560202	0.295975
cg08065240	37	1	11401943									0.34811	0.758515	0.410405
cg26947569	37	1	11544489	PTCHD2	NM_020780	5'UTR						0.315329	0.58995	0.274621
cg00659590	37	1	11549275	PTCHD2	NM_020780	5'UTR						0.368849	0.661499	0.29265
cg00951310	37	1	11586259	PTCHD2	NM_020780	Body	chr1:11589838-11590044	N_Shelf			TRUE	0.348561	0.644685	0.296124
cg12934106	37	1	11591545	PTCHD2	NM_020780	Body	chr1:11589838-11590044	S_Shore				0.302816	0.581427	0.278611
cg04201578	37	1	11600603				chr1:11596382-11596622	S_Shelf				0.520587	0.782709	0.262122
cg17028912	37	1	11619369									0.370077	0.665574	0.295497
cg08576975	37	1	11626664									0.407012	0.669813	0.262801
cg17143168	37	1	11632135								TRUE	0.286085	0.538932	0.252847
cg15746187	37	1	11713123	FBXO2;FBXO44	NM_012168;NM_183412	Body;TSS1500	chr1:11714217-11715304	N_Shore			TRUE	0.3133	0.701838	0.388538
cg22450927	37	1	11713238	FBXO2;FBXO44	NM_012168;NM_183412	Body;TSS1500	chr1:11714217-11715304	N_Shore			TRUE	0.500878	0.833379	0.332501
cg06848073	37	1	11713540	FBXO44;FBXO2;FBXO44;FBXO44;FBXO44	NM_183413;NM_012168;NM_183412;NM_033182;NM_001014765	TSS1500;Body;TSS1500;TSS1500;TSS1500	chr1:11714217-11715304	N_Shore			TRUE	0.203354	0.520916	0.317563
cg19747992	37	1	11713643	FBXO44;FBXO2;FBXO44;FBXO44;FBXO44	NM_183413;NM_012168;NM_183412;NM_033182;NM_001014765	TSS1500;Body;TSS1500;TSS1500;TSS1500	chr1:11714217-11715304	N_Shore			TRUE	0.417908	0.86269	0.444782
cg16077279	37	1	11714269	FBXO2;FBXO44;FBXO44;FBXO44;FBXO44;FBXO44;FBXO44;FBXO44	NM_012168;NM_183412;NM_001304791;NM_001014765;NM_183413;NM_001304790;NM_033182;NR_130909	Body;TSS200;TSS200;TSS1500;TSS1500;TSS1500;TSS1500;TSS1500	chr1:11714217-11715304	Island				0.195861	0.470355	0.274493
cg12857717	37	1	11716171	FBXO44;FBXO44;FBXO44;FBXO2;FBXO44	NM_183413;NM_033182;NM_183412;NM_012168;NM_001014765	Body;Body;Body;TSS1500;Body	chr1:11714217-11715304	S_Shore			TRUE	0.519445	0.83576	0.316315
cg06631863	37	1	11742435	MAD2L2;MAD2L2	NM_006341;NM_001127325	TSS1500;5'UTR	chr1:11740828-11741717	S_Shore				0.257616	0.591956	0.33434
cg16912292	37	1	11792692				chr1:11795975-11796263	N_Shelf				0.590568	0.859559	0.26899
cg18169620	37	1	11824383	C1orf167;C1orf167	NM_001010881;NM_001010881	5'UTR;ExonBnd	chr1:11822139-11822363	S_Shelf				0.446597	0.753286	0.306689
cg21864959	37	1	11847863	MTHFR	NM_005957	3'UTR					TRUE	0.200538	0.456209	0.255671
cg23031484	37	1	11936586								TRUE	0.471738	0.783394	0.311656
cg11617285	37	1	12026170	PLOD1	NM_000302	Body						0.503874	0.898072	0.394198
cg02528347	37	1	12030750	PLOD1	NM_000302	Body						0.533669	0.902246	0.368577
cg05988775	37	1	12030833	PLOD1	NM_000302	Body						0.600185	0.89116	0.290975
cg18091520	37	1	12030842	PLOD1	NM_000302	Body						0.503504	0.937842	0.434337
cg24849974	37	1	12031504	PLOD1	NM_000302	Body						0.41654	0.793826	0.377286
cg09820729	37	1	12039712	MFN2;MFN2	NM_014874;NM_001127660	TSS1500;TSS1500	chr1:12040113-12040793	N_Shore			TRUE	0.143724	0.419786	0.276062
cg04058122	37	1	12039793	MFN2;MFN2	NM_014874;NM_001127660	TSS1500;TSS1500	chr1:12040113-12040793	N_Shore				0.119616	0.427582	0.307966
cg22028722	37	1	12041852	MFN2;MFN2	NM_014874;NM_001127660	5'UTR;5'UTR	chr1:12040113-12040793	S_Shore				0.318975	0.636536	0.31756
cg13216073	37	1	12042593	MFN2;MFN2	NM_001127660;NM_014874	5'UTR;5'UTR	chr1:12040113-12040793	S_Shore			TRUE	0.422093	0.848041	0.425947
cg10283346	37	1	12044158	MFN2;MFN2	NM_014874;NM_001127660	5'UTR;5'UTR	chr1:12040113-12040793	S_Shelf				0.364389	0.746551	0.382163
cg09233112	37	1	12074638									0.384505	0.746657	0.362152
cg12601933	37	1	12248895	TNFRSF1B	NM_001066	Body	chr1:12251777-12251985	N_Shelf			TRUE	0.395208	0.769225	0.374017
cg15622556	37	1	12251820	TNFRSF1B	NM_001066	Body	chr1:12251777-12251985	Island			TRUE	0.512142	0.812912	0.30077
cg06740893	37	1	12251869	TNFRSF1B	NM_001066	Body	chr1:12251777-12251985	Island			TRUE	0.600676	0.869475	0.2688
cg02398947	37	1	12292851	VPS13D;VPS13D	NM_018156;NM_015378	5'UTR;5'UTR	chr1:12290955-12291199	S_Shore				0.451642	0.893237	0.441595
cg23728867	37	1	12304452	VPS13D;VPS13D	NM_015378;NM_018156	Body;Body					TRUE	0.341227	0.732663	0.391436
cg17184255	37	1	12304762	VPS13D;VPS13D	NM_015378;NM_018156	Body;Body					TRUE	0.336619	0.785287	0.448668
cg04920869	37	1	12336515	VPS13D;VPS13D	NM_015378;NM_018156	Body;Body					TRUE	0.484745	0.755318	0.270572
cg16724818	37	1	12469690	VPS13D;VPS13D	NM_018156;NM_015378	Body;Body						0.613067	0.884903	0.271835
cg20803931	37	1	12497013	VPS13D;VPS13D	NM_015378;NM_018156	Body;Body					TRUE	0.624609	0.899319	0.27471
cg04725597	37	1	12510657	VPS13D;VPS13D	NM_018156;NM_015378	Body;Body						0.460151	0.876661	0.41651
cg26228280	37	1	12514410	VPS13D;VPS13D	NM_015378;NM_018156	Body;Body					TRUE	0.371985	0.669184	0.297199
cg11217193	37	1	12538341	VPS13D;VPS13D	NM_015378;NM_018156	Body;Body					TRUE	0.311188	0.594778	0.283591
cg14884895	37	1	12538350	VPS13D;VPS13D	NM_018156;NM_015378	Body;Body						0.142183	0.505598	0.363415
cg10622644	37	1	12538455	VPS13D;VPS13D	NM_015378;NM_018156	Body;Body					TRUE	0.11144	0.441979	0.330538
cg04608253	37	1	12538512	VPS13D;VPS13D	NM_018156;NM_015378	Body;Body						0.093095	0.373787	0.280692
cg13466988	37	1	12538541	VPS13D;VPS13D	NM_015378;NM_018156	Body;Body					TRUE	0.0761795	0.400869	0.324689
cg07804749	37	1	12610104								TRUE	0.310237	0.561881	0.251644
cg01955475	37	1	12625396									0.244225	0.519499	0.275274
cg03546360	37	1	12675968	DHRS3	NM_004753	Body	chr1:12676983-12678642	N_Shore			TRUE	0.184353	0.448826	0.264473
cg04043043	37	1	13843551				chr1:13839505-13840613	S_Shelf				0.299299	0.563511	0.264211
cg23954416	37	1	13909161	PDPN;PDPN	NM_006474;NM_198389	TSS1500;TSS1500	chr1:13909606-13909842	N_Shore			TRUE	0.458773	0.849672	0.390899
cg26908117	37	1	13926805	PDPN;PDPN;PDPN;PDPN	NM_198389;NM_006474;NM_001006625;NM_001006624	Body;Body;5'UTR;5'UTR						0.3004	0.601862	0.301462
cg14027957	37	1	13930786	PDPN;PDPN;PDPN;PDPN	NM_001006624;NM_006474;NM_001006625;NM_198389	5'UTR;Body;5'UTR;Body					TRUE	0.382113	0.699277	0.317163
cg09064486	37	1	13946454								TRUE	0.323211	0.666833	0.343622
cg20859811	37	1	13988163									0.238777	0.54726	0.308482
cg21487656	37	1	13988209									0.371115	0.738426	0.367311
cg26133418	37	1	13990670									0.443391	0.701545	0.258153
cg23799025	37	1	13992541								TRUE	0.288831	0.591061	0.30223
cg20464068	37	1	14026054	PRDM2	NM_001135610	TSS1500	chr1:14026481-14027200	N_Shore			TRUE	0.317794	0.606448	0.288654
cg19300923	37	1	14026137	PRDM2	NM_001135610	TSS1500	chr1:14026481-14027200	N_Shore			TRUE	0.382565	0.695276	0.312712
cg02330214	37	1	14026216	PRDM2	NM_001135610	TSS1500	chr1:14026481-14027200	N_Shore			TRUE	0.447278	0.724389	0.277111
cg07159416	37	1	14035090	PRDM2;PRDM2;PRDM2	NM_001135610;NM_015866;NM_012231	5'UTR;5'UTR;5'UTR						0.6131	0.922714	0.309614
cg14585803	37	1	14085821	PRDM2;PRDM2;PRDM2;PRDM2	NM_015866;NM_012231;NM_001135610;NM_001007257	Body;Body;Body;5'UTR						0.437881	0.847236	0.409355
cg20573923	37	1	14125466	PRDM2;PRDM2	NM_012231;NM_001135610	Body;Body						0.560683	0.922261	0.361578
cg11760345	37	1	14127408	PRDM2;PRDM2	NM_012231;NM_001135610	Body;Body						0.56938	0.874624	0.305243
cg04804874	37	1	14127792	PRDM2;PRDM2	NM_012231;NM_001135610	Body;Body						0.330981	0.803186	0.472205
cg14947200	37	1	14128574	PRDM2;PRDM2	NM_012231;NM_001135610	Body;Body						0.361054	0.788239	0.427185
cg04793989	37	1	14292195								TRUE	0.274094	0.596891	0.322797
cg02366878	37	1	14467466							chr1:14467397-14467397		0.233144	0.544048	0.310904
cg15118606	37	1	14954053	KIAA1026;KIAA1026	NM_201628;NM_015209	Body;Body					TRUE	0.478487	0.808809	0.330322
cg10347456	37	1	14954802	KAZN;KAZN	NM_015209;NM_201628	Body;Body						0.28191	0.653831	0.371921
cg26261148	37	1	15059627	KAZN;KAZN	NM_015209;NM_201628	Body;Body				chr1:15059594-15059594		0.238811	0.545289	0.306479
cg01017257	37	1	15059738	KIAA1026;KIAA1026	NM_201628;NM_015209	Body;Body					TRUE	0.14853	0.415274	0.266744
cg09137204	37	1	15060724	KIAA1026;KIAA1026	NM_201628;NM_015209	Body;Body					TRUE	0.464921	0.837202	0.37228
cg16063790	37	1	15072255	KAZN;KAZN	NM_015209;NM_201628	Body;Body						0.199235	0.47888	0.279645
cg06887407	37	1	15086357	KIAA1026;KIAA1026	NM_201628;NM_015209	Body;Body					TRUE	0.373261	0.629104	0.255843
cg08436375	37	1	15092381	KAZN;KAZN	NM_015209;NM_201628	Body;Body						0.415568	0.866155	0.450586
cg05033389	37	1	15170397	KIAA1026;KIAA1026	NM_201628;NM_015209	Body;Body					TRUE	0.2314	0.522024	0.290624
cg17951572	37	1	15238058	KAZN;KAZN	NM_015209;NM_201628	Body;Body						0.290058	0.671251	0.381193
cg13502395	37	1	15240629	KIAA1026;KIAA1026	NM_201628;NM_015209	Body;Body					TRUE	0.348577	0.693999	0.345422
cg05043339	37	1	15255847	KIAA1026;KIAA1026;KIAA1026;KIAA1026	NM_201628;NM_001018001;NM_015209;NM_001018000	Body;TSS1500;Body;Body					TRUE	0.509346	0.793775	0.284429
cg00763594	37	1	15256054	KIAA1026;KIAA1026;KIAA1026;KIAA1026	NM_201628;NM_001018001;NM_015209;NM_001018000	Body;TSS1500;Body;Body					TRUE	0.179241	0.448673	0.269433
cg19520372	37	1	15256127	KIAA1026;KIAA1026;KIAA1026;KIAA1026	NM_201628;NM_001018001;NM_015209;NM_001018000	Body;TSS200;Body;Body					TRUE	0.24372	0.587352	0.343632
cg19710662	37	1	15256222	KIAA1026;KIAA1026;KIAA1026;KIAA1026	NM_201628;NM_001018001;NM_015209;NM_001018000	Body;TSS200;Body;Body					TRUE	0.273269	0.538375	0.265105
cg13469034	37	1	15256481	KIAA1026;KIAA1026;KIAA1026;KIAA1026;KIAA1026	NM_201628;NM_001018001;NM_015209;NM_001018000;NM_001018001	Body;5'UTR;Body;Body;1stExon					TRUE	0.406552	0.787464	0.380912
cg12436021	37	1	15266185	KAZN;KAZN;KAZN;KAZN	NM_001018001;NM_015209;NM_201628;NM_001018000	5'UTR;Body;Body;Body						0.455821	0.809757	0.353936
cg00577560	37	1	15271830	KIAA1026;KIAA1026;KIAA1026;KIAA1026;KIAA1026	NM_201628;NM_001018001;NM_001017999;NM_015209;NM_001018000	Body;5'UTR;TSS1500;Body;Body					TRUE	0.170554	0.429822	0.259268
cg21413173	37	1	15271952	KIAA1026;KIAA1026;KIAA1026;KIAA1026;KIAA1026	NM_201628;NM_001018001;NM_001017999;NM_015209;NM_001018000	Body;5'UTR;TSS1500;Body;Body					TRUE	0.107217	0.357675	0.250458
cg03398002	37	1	15272082	KIAA1026;KIAA1026;KIAA1026;KIAA1026;KIAA1026	NM_201628;NM_001018001;NM_001017999;NM_015209;NM_001018000	Body;5'UTR;TSS1500;Body;Body			low-CpG:15144666-15144670		TRUE	0.172156	0.464199	0.292042
cg11648522	37	1	15272238	KIAA1026;KIAA1026;KIAA1026;KIAA1026;KIAA1026	NM_001017999;NM_201628;NM_001018001;NM_015209;NM_001018000	TSS200;Body;5'UTR;Body;Body					TRUE	0.177369	0.427629	0.250261
cg00682038	37	1	15272271	KAZN;KAZN;KAZN;KAZN;KAZN	NM_001017999;NM_001018001;NM_015209;NM_201628;NM_001018000	TSS200;5'UTR;Body;Body;Body						0.215767	0.493159	0.277393
cg24289966	37	1	15272291	KAZN;KAZN;KAZN;KAZN;KAZN	NM_001017999;NM_001018001;NM_015209;NM_201628;NM_001018000	TSS200;5'UTR;Body;Body;Body						0.191728	0.450944	0.259216
cg26577320	37	1	15272326	KIAA1026;KIAA1026;KIAA1026;KIAA1026;KIAA1026	NM_001017999;NM_201628;NM_001018001;NM_015209;NM_001018000	TSS200;Body;5'UTR;Body;Body					TRUE	0.195115	0.498006	0.302891
cg12961165	37	1	15280803	KAZN;KAZN;KAZN;KAZN;KAZN	NM_001018001;NM_001017999;NM_015209;NM_201628;NM_001018000	5'UTR;5'UTR;Body;Body;Body						0.212529	0.515644	0.303115
cg27031344	37	1	15315056	KAZN;KAZN;KAZN;KAZN;KAZN	NM_015209;NM_201628;NM_001018000;NM_001017999;NM_001018001	Body;Body;Body;Body;Body						0.245484	0.629919	0.384435
cg13803488	37	1	15410360	KAZN	NM_201628	Body						0.279404	0.534846	0.255442
cg10404278	37	1	15499480	TMEM51;TMEM51;TMEM51;TMEM51;C1orf195;C1orf195	NM_001136217;NM_001136216;NM_001136218;NM_018022;NM_001278501;NM_001278502	5'UTR;5'UTR;5'UTR;5'UTR;TSS1500;TSS1500						0.411733	0.759112	0.34738
cg17670798	37	1	15500722	TMEM51;TMEM51;TMEM51;TMEM51	NM_001136217;NM_001136216;NM_001136218;NM_018022	5'UTR;5'UTR;5'UTR;5'UTR						0.421477	0.733305	0.311828
cg16852463	37	1	15523893	TMEM51;TMEM51;TMEM51;TMEM51	NM_001136217;NM_001136216;NM_001136218;NM_018022	5'UTR;5'UTR;5'UTR;5'UTR						0.479963	0.855367	0.375403
cg06869505	37	1	15527517	TMEM51;TMEM51;TMEM51;TMEM51	NM_001136218;NM_018022;NM_001136216;NM_001136217	5'UTR;5'UTR;5'UTR;5'UTR					TRUE	0.319197	0.576487	0.257291
cg09022584	37	1	15541956	TMEM51;TMEM51;TMEM51;TMEM51	NM_001136217;NM_001136218;NM_001136216;NM_018022	Body;Body;Body;Body	chr1:15541181-15541447	S_Shore			TRUE	0.455952	0.806484	0.350533
cg22944261	37	1	15556377									0.382256	0.668627	0.286371
cg01623747	37	1	15606535	FHAD1	NM_052929	Body						0.383786	0.664939	0.281153
cg17236143	37	1	15611176	FHAD1	NM_052929	Body						0.501943	0.916171	0.414228
cg23848683	37	1	15611382	FHAD1	NM_052929	Body						0.381314	0.742799	0.361485
cg23748140	37	1	15613461	FHAD1	NM_052929	Body						0.48716	0.745564	0.258404
cg26079736	37	1	15623452	FHAD1	NM_052929	Body						0.382838	0.869253	0.486414
cg17889250	37	1	15678844	FHAD1	NM_052929	Body						0.401667	0.764066	0.362399
cg02407779	37	1	15691342	FHAD1	NM_052929	Body						0.394133	0.764364	0.370231
cg19752233	37	1	15728076									0.370561	0.823017	0.452456
cg03048488	37	1	15733844				chr1:15736033-15737228	N_Shelf			TRUE	0.127234	0.39788	0.270645
cg04922576	37	1	15745308	EFHD2	NM_024329	Body						0.430964	0.753051	0.322086
cg20149780	37	1	15751063	EFHD2	NM_024329	Body					TRUE	0.482084	0.816354	0.33427
cg20643422	37	1	15809591	CELA2B	NM_015849	Body						0.433844	0.860541	0.426697
cg24579618	37	1	15831653	CASP9;CASP9;CASP9;CASP9;CASP9	NR_102733;NR_102732;NM_032996;NM_001229;NM_001278054	Body;Body;Body;Body;Body						0.478906	0.762837	0.28393
cg12656805	37	1	15844762	CASP9;CASP9;CASP9;CASP9;CASP9;CASP9	NR_102733;NR_102733;NR_102732;NM_032996;NM_001229;NM_001278054	ExonBnd;Body;Body;Body;Body;Body						0.312439	0.758491	0.446052
cg09703297	37	1	15919055									0.320406	0.742515	0.422109
cg14566220	37	1	16007630				chr1:16011266-16011502	N_Shelf				0.420754	0.825601	0.404847
cg07832274	37	1	16012588	PLEKHM2	NM_015164	Body	chr1:16011266-16011502	S_Shore				0.414727	0.892272	0.477544
cg09873284	37	1	16029777	PLEKHM2	NM_015164	Body					TRUE	0.391567	0.694556	0.302989
cg19916794	37	1	16061408	SLC25A34	NM_207348	TSS1500	chr1:16058297-16058505	S_Shelf			TRUE	0.390878	0.69008	0.299202
cg09662329	37	1	16062445	SLC25A34	NM_207348	TSS1500	chr1:16058297-16058505	S_Shelf				0.340183	0.700782	0.360599
cg16713727	37	1	16062720	SLC25A34	NM_207348	TSS200					TRUE	0.48296	0.824393	0.341433
cg03575366	37	1	16062729	SLC25A34	NM_207348	TSS200						0.535578	0.869427	0.33385
cg05510104	37	1	16062735	SLC25A34	NM_207348	TSS200						0.542684	0.908796	0.366112
cg10881110	37	1	16062737	SLC25A34	NM_207348	TSS200					TRUE	0.448663	0.729258	0.280595
cg06761377	37	1	16062757	SLC25A34	NM_207348	TSS200					TRUE	0.293982	0.639796	0.345814
cg15616400	37	1	16062894	SLC25A34;SLC25A34	NM_207348;NM_207348	5'UTR;1stExon					TRUE	0.512896	0.833784	0.320888
cg21821674	37	1	16063471	SLC25A34	NM_207348	Body					TRUE	0.269217	0.569945	0.300729
cg09848498	37	1	16063649	SLC25A34	NM_207348	Body						0.40103	0.840505	0.439474
cg11947606	37	1	16067505	SLC25A34;TMEM82	NM_207348;NM_001013641	3'UTR;TSS1500	chr1:16070628-16070853	N_Shelf				0.331622	0.741067	0.409446
cg15405959	37	1	16090754	FBLIM1;FBLIM1;FBLIM1	NM_001024215;NM_001024216;NM_017556	TSS1500;TSS1500;5'UTR						0.294337	0.577436	0.283099
cg23507918	37	1	16090884	FBLIM1;FBLIM1;FBLIM1	NM_001024216;NM_001024215;NM_017556	TSS1500;TSS200;5'UTR						0.315605	0.619869	0.304264
cg14351160	37	1	16090928	FBLIM1;FBLIM1;FBLIM1	NM_001024216;NM_001024215;NM_017556	TSS1500;TSS200;5'UTR						0.357931	0.851252	0.493321
cg06747907	37	1	16091100	FBLIM1;FBLIM1;FBLIM1;FBLIM1	NM_001024215;NM_017556;NM_001024216;NM_001024215	5'UTR;5'UTR;TSS1500;1stExon					TRUE	0.217116	0.518062	0.300946
cg12068257	37	1	16091149	FBLIM1;FBLIM1;FBLIM1;FBLIM1	NM_001024215;NM_017556;NM_001024216;NM_001024215	5'UTR;5'UTR;TSS1500;1stExon					TRUE	0.206615	0.477489	0.270875
cg11401784	37	1	16092264	FBLIM1;FBLIM1;FBLIM1	NM_001024216;NM_017556;NM_001024215	Body;Body;Body					TRUE	0.401928	0.777634	0.375707
cg19798042	37	1	16135577	UQCRHL	NM_001089591	TSS1500						0.617499	0.897242	0.279742
cg05694089	37	1	16159484				chr1:16161260-16162880	N_Shore			TRUE	0.360516	0.806749	0.446233
cg12846127	37	1	16209227	MIR5096;SPEN	NR_039973;NM_015001	Body;Body						0.619645	0.897223	0.277578
cg26039954	37	1	16220025	SPEN	NM_015001	Body					TRUE	0.584512	0.850273	0.26576
cg02810262	37	1	16249962	SPEN	NM_015001	Body						0.313927	0.652947	0.33902
cg06947191	37	1	16332953	C1orf64	NM_178840	3'UTR					TRUE	0.573444	0.886737	0.313293
cg14529268	37	1	16335452								TRUE	0.306745	0.683166	0.376421
cg00712159	37	1	16401926				chr1:16399648-16400072	S_Shore		chr1:16401814-16401814		0.23356	0.534308	0.300748
cg11218176	37	1	16403434				chr1:16399648-16400072	S_Shelf			TRUE	0.315029	0.592426	0.277396
cg12028696	37	1	16446112									0.496948	0.839001	0.342053
cg10458961	37	1	16448346									0.466309	0.839246	0.372937
cg12828479	37	1	16482773	EPHA2	NM_004431	TSS200	chr1:16481484-16482782	Island				0.210608	0.484773	0.274165
cg11576531	37	1	16485531				chr1:16481484-16482782	S_Shelf				0.451651	0.877743	0.426092
cg14666575	37	1	16485606				chr1:16481484-16482782	S_Shelf				0.420685	0.85217	0.431485
cg25574430	37	1	16485727				chr1:16481484-16482782	S_Shelf				0.427842	0.878349	0.450507
cg10024392	37	1	16485744				chr1:16481484-16482782	S_Shelf				0.351483	0.82984	0.478357
cg12311416	37	1	16509724									0.240631	0.595325	0.354694
cg05034053	37	1	16511783									0.664971	0.925592	0.26062
cg00521428	37	1	16534579	ARHGEF19	NM_153213	Body	chr1:16532917-16534580	Island			TRUE	0.40636	0.674204	0.267843
cg25220781	37	1	16539013	ARHGEF19;ARHGEF19	NM_153213;NM_153213	5'UTR;1stExon					TRUE	0.255379	0.516741	0.261362
cg10932722	37	1	16539341	ARHGEF19	NM_153213	TSS1500						0.193084	0.474331	0.281247
cg14186448	37	1	16572210									0.480679	0.830832	0.350153
cg14627669	37	1	16573655	FBXO42	NM_018994	3'UTR						0.316994	0.62713	0.310136
cg17598607	37	1	16574756	FBXO42	NM_018994	3'UTR						0.606859	0.914618	0.307759
cg08338380	37	1	16580175	FBXO42	NM_018994	Body						0.543839	0.879501	0.335662
cg06216849	37	1	16620850	FBXO42	NM_018994	Body						0.405756	0.795647	0.389891
cg06673951	37	1	16642019	FBXO42	NM_018994	5'UTR						0.227387	0.506476	0.279089
cg05059632	37	1	16642187	FBXO42	NM_018994	5'UTR						0.262836	0.697993	0.435158
cg05731680	37	1	16648039	FBXO42	NM_018994	5'UTR						0.278954	0.575874	0.296921
cg20554060	37	1	16661148	FBXO42	NM_018994	5'UTR						0.618738	0.898542	0.279804
cg15184187	37	1	16722920	SZRD1;SZRD1;SZRD1;SZRD1;SZRD1;SZRD1	NM_001114600;NM_001271869;NR_073503;NR_073502;NR_073501;NR_073500	3'UTR;3'UTR;Body;Body;Body;Body						0.508077	0.893709	0.385632
cg02523797	37	1	16733702	SPATA21	NM_198546	Body						0.483528	0.868268	0.384739
cg11446433	37	1	16801163	CROCCP3	NR_023386	Body						0.532773	0.785284	0.25251
cg10558598	37	1	16950871	CROCCL1	NR_026752	Body					TRUE	0.333232	0.69901	0.365778
cg26314478	37	1	17030971	ESPNP	NR_026567	Body	chr1:17033768-17034728	N_Shelf			TRUE	0.373938	0.682249	0.308311
cg23205676	37	1	17046897	ESPNP	NR_026567	TSS1500					TRUE	0.48867	0.831995	0.343325
cg25657615	37	1	17274832	CROCC;CROCC	NM_014675;NM_014675	ExonBnd;Body						0.358913	0.677724	0.318811
cg12402555	37	1	17281819	CROCC	NM_014675	Body	chr1:17281818-17282056	Island			TRUE	0.49286	0.791242	0.298383
cg15015913	37	1	17282008	CROCC	NM_014675	Body	chr1:17281818-17282056	Island			TRUE	0.643507	0.934586	0.291078
cg27582013	37	1	17290228	CROCC	NM_014675	Body	chr1:17292904-17293115	N_Shelf			TRUE	0.229362	0.496071	0.266709
cg21304454	37	1	17302859	MFAP2;MFAP2;MFAP2;MFAP2	NM_017459;NM_001135248;NM_002403;NM_001135247	Body;Body;Body;Body	chr1:17306551-17307363	N_Shelf			TRUE	0.321592	0.816229	0.494637
cg14726606	37	1	17311524									0.179806	0.495445	0.315639
cg21388168	37	1	17321578	ATP13A2;ATP13A2;ATP13A2	NM_001141974;NM_001141973;NM_022089	Body;Body;Body						0.508682	0.924597	0.415916
cg25667865	37	1	17325354	ATP13A2;ATP13A2;ATP13A2	NM_001141974;NM_001141973;NM_022089	Body;Body;Body						0.315521	0.586741	0.27122
cg22537328	37	1	17330893	ATP13A2;ATP13A2;ATP13A2	NM_022089;NM_001141974;NM_001141973	Body;Body;Body	chr1:17331885-17332093	N_Shore			TRUE	0.573052	0.932941	0.35989
cg13687585	37	1	17338929	ATP13A2;ATP13A2;ATP13A2	NM_001141974;NM_001141973;NM_022089	TSS1500;TSS1500;TSS1500	chr1:17337829-17338590	S_Shore				0.33604	0.715874	0.379835
cg23842298	37	1	17338957	ATP13A2;ATP13A2;ATP13A2	NM_001141974;NM_001141973;NM_022089	TSS1500;TSS1500;TSS1500	chr1:17337829-17338590	S_Shore				0.401874	0.745411	0.343537
cg03961338	37	1	17372338	SDHB	NM_003000	Body						0.285556	0.571861	0.286305
cg08168943	37	1	17513684									0.495082	0.833597	0.338515
cg08028165	37	1	17519085							chr1:17518941-17518941		0.430591	0.719244	0.288653
cg15859167	37	1	17519342									0.436098	0.766196	0.330098
cg21208518	37	1	17530676	PADI1	NM_013358	TSS1500					TRUE	0.443882	0.78847	0.344588
cg20321265	37	1	17542027	PADI1	NM_013358	Body					TRUE	0.357794	0.703325	0.345531
cg19169377	37	1	17559582	PADI1	NM_013358	Body						0.400035	0.667623	0.267588
cg12654045	37	1	17559606	PADI1	NM_013358	Body					TRUE	0.318246	0.568908	0.250662
cg26853320	37	1	17584703	PADI3	NM_016233	Body						0.563815	0.81565	0.251835
cg10605072	37	1	17614280									0.333276	0.662165	0.328889
cg00133657	37	1	17616238									0.120715	0.419112	0.298397
cg12336009	37	1	17697922	PADI6	NM_207421	TSS1500						0.430428	0.801028	0.3706
cg00298399	37	1	17697934	PADI6	NM_207421	TSS1500					TRUE	0.306959	0.572871	0.265911
cg23433205	37	1	17735708	RCC2;RCC2	NM_001136204;NM_018715	Body;Body	chr1:17734435-17734645	S_Shore				0.59878	0.866988	0.268208
cg10329579	37	1	17754830	RCC2;RCC2	NM_018715;NM_001136204	Body;Body					TRUE	0.620702	0.90102	0.280318
cg22226024	37	1	17759877	RCC2;RCC2	NM_018715;NM_001136204	Body;Body					TRUE	0.496638	0.772993	0.276355
cg23913963	37	1	17766917	RCC2	NM_018715	TSS1500	chr1:17764072-17765811	S_Shore			TRUE	0.272324	0.744997	0.472673
cg10582712	37	1	17767282	RCC2	NM_018715	TSS1500	chr1:17764072-17765811	S_Shore				0.331494	0.664773	0.333279
cg00427023	37	1	17770076									0.301264	0.588417	0.287153
cg14347781	37	1	17786764									0.32946	0.662488	0.333028
cg10786474	37	1	17802476									0.416892	0.691952	0.27506
cg27525520	37	1	17818735									0.39118	0.654801	0.263621
cg10773780	37	1	17846756						low-CpG:17719274-17719415		TRUE	0.386039	0.68717	0.301131
cg09599402	37	1	17865334	ARHGEF10L	NM_018125	TSS1500	chr1:17865863-17866630	N_Shore		chr1:17865185-17865185		0.221976	0.473417	0.25144
cg06848849	37	1	17914339	ARHGEF10L;ARHGEF10L	NM_018125;NM_001011722	Body;Body						0.205938	0.458036	0.252099
cg05471630	37	1	17975369	ARHGEF10L;ARHGEF10L	NM_018125;NM_001011722	Body;Body						0.405433	0.695691	0.290258
cg21721649	37	1	17981114	ARHGEF10L;ARHGEF10L;ARHGEF10L;ARHGEF10L	NM_018125;NM_001011722;NM_018125;NM_001011722	ExonBnd;ExonBnd;Body;Body						0.365789	0.708948	0.343159
cg16747903	37	1	18010399	ARHGEF10L;ARHGEF10L	NM_018125;NM_001011722	Body;Body						0.422245	0.920559	0.498314
cg00432255	37	1	18277388									0.447002	0.771815	0.324814
cg09787549	37	1	18372919									0.440932	0.748097	0.307165
cg25989400	37	1	18386994									0.432799	0.812798	0.379999
cg05440683	37	1	18493056	IGSF21	NM_032880	Body						0.492587	0.754656	0.262068
cg00983740	37	1	18561661	IGSF21	NM_032880	Body						0.269342	0.748942	0.4796
cg15081740	37	1	18606374	IGSF21	NM_032880	Body					TRUE	0.393983	0.706482	0.3125
cg23709653	37	1	18646649	IGSF21	NM_032880	Body						0.224068	0.474354	0.250286
cg09866233	37	1	18646978	IGSF21	NM_032880	Body						0.555859	0.831627	0.275768
cg11175836	37	1	18806700	KLHDC7A	NM_152375	TSS1500	chr1:18808873-18809667	N_Shelf			TRUE	0.320163	0.602995	0.282832
cg15121773	37	1	18911498									0.22412	0.550196	0.326075
cg08436280	37	1	18995461	PAX7;PAX7;PAX7	NM_013945;NM_002584;NM_001135254	Body;Body;Body						0.307684	0.573004	0.26532
cg07066331	37	1	18997466	PAX7;PAX7;PAX7	NM_013945;NM_002584;NM_001135254	Body;Body;Body						0.349907	0.637833	0.287926
cg00892228	37	1	19176908	TAS1R2	NM_152232	Body						0.313249	0.596165	0.282916
cg03224850	37	1	19199155	ALDH4A1;ALDH4A1;ALDH4A1	NM_170726;NM_001161504;NM_003748	3'UTR;3'UTR;3'UTR					TRUE	0.321375	0.618463	0.297088
cg13489553	37	1	19203897	ALDH4A1;ALDH4A1;ALDH4A1	NM_170726;NM_001161504;NM_003748	Body;Body;Body	chr1:19203874-19204234	Island			TRUE	0.683581	0.935675	0.252094
cg10108612	37	1	19203999	ALDH4A1;ALDH4A1;ALDH4A1	NM_170726;NM_001161504;NM_003748	Body;Body;Body	chr1:19203874-19204234	Island			TRUE	0.53922	0.859064	0.319844
cg04088289	37	1	19205990	ALDH4A1;ALDH4A1;ALDH4A1	NM_170726;NM_001161504;NM_003748	Body;Body;Body	chr1:19203874-19204234	S_Shore			TRUE	0.511835	0.828762	0.316928
cg16823064	37	1	19206559	ALDH4A1;ALDH4A1;ALDH4A1	NM_170726;NM_001161504;NM_003748	Body;Body;Body	chr1:19209626-19209914	N_Shelf			TRUE	0.547443	0.833953	0.28651
cg25384423	37	1	19208697	ALDH4A1;ALDH4A1;ALDH4A1	NM_170726;NM_001161504;NM_003748	Body;Body;Body	chr1:19209626-19209914	N_Shore			TRUE	0.32094	0.677365	0.356425
cg15726706	37	1	19209106	ALDH4A1;ALDH4A1;ALDH4A1	NM_001161504;NM_003748;NM_170726	Body;Body;Body	chr1:19209626-19209914	N_Shore				0.341949	0.628989	0.28704
cg26668600	37	1	19221525	ALDH4A1;ALDH4A1	NM_003748;NM_170726	Body;Body						0.342663	0.645325	0.302662
cg03920235	37	1	19223031	ALDH4A1;ALDH4A1	NM_003748;NM_170726	Body;Body						0.620185	0.880136	0.259951
cg22390041	37	1	19226319	ALDH4A1;ALDH4A1	NM_170726;NM_003748	Body;Body	chr1:19228828-19229634	N_Shelf			TRUE	0.419179	0.769642	0.350463
cg11886662	37	1	19230026	ALDH4A1;ALDH4A1	NM_003748;NM_170726	TSS1500;TSS1500	chr1:19228828-19229634	S_Shore				0.332491	0.705846	0.373355
cg18147080	37	1	19244121	IFFO2	NM_001136265	Body					TRUE	0.566783	0.852031	0.285248
cg13407917	37	1	19244694	IFFO2	NM_001136265	Body						0.569286	0.828508	0.259221
cg10093938	37	1	19248952	IFFO2	NM_001136265	Body				chr1:19248887-19248887		0.116745	0.392844	0.2761
cg05945559	37	1	19249872	IFFO2	NM_001136265	Body						0.323542	0.651082	0.32754
cg09012001	37	1	19250279	IFFO2	NM_001136265	Body					TRUE	0.249901	0.546188	0.296287
cg19839415	37	1	19259050	IFFO2	NM_001136265	Body						0.356893	0.762618	0.405724
cg12335709	37	1	19263806	IFFO2	NM_001136265	Body						0.45133	0.883262	0.431932
cg26645610	37	1	19263840	IFFO2	NM_001136265	Body						0.465463	0.864219	0.398756
cg16360668	37	1	19265059	IFFO2	NM_001136265	Body					TRUE	0.515582	0.854324	0.338742
cg01780952	37	1	19265798	IFFO2	NM_001136265	Body						0.606712	0.906086	0.299374
cg05416345	37	1	19266187	IFFO2	NM_001136265	Body						0.413521	0.817035	0.403515
cg00760014	37	1	19267827	IFFO2	NM_001136265	Body					TRUE	0.242485	0.565362	0.322877
cg11237901	37	1	19272128	IFFO2	NM_001136265	Body						0.26107	0.545081	0.284011
cg10679106	37	1	19273747	IFFO2	NM_001136265	Body						0.240181	0.605274	0.365093
cg27370890	37	1	19274318	IFFO2	NM_001136265	Body						0.495382	0.858286	0.362905
cg11697440	37	1	19280186	IFFO2	NM_001136265	Body	chr1:19281948-19283883	N_Shore		chr1:19280139-19280139	TRUE	0.419944	0.848825	0.42888
cg10203842	37	1	19280546	IFFO2	NM_001136265	Body	chr1:19281948-19283883	N_Shore		chr1:19280139-19280139	TRUE	0.427495	0.821027	0.393532
cg00594610	37	1	19284402				chr1:19281948-19283883	S_Shore				0.508084	0.779555	0.271471
cg11947149	37	1	19360578							chr1:19360402-19360402		0.357469	0.646909	0.289441
cg02534642	37	1	19363003									0.436857	0.748665	0.311808
cg17833419	37	1	19392447								TRUE	0.355575	0.783084	0.427509
cg21417130	37	1	19400922								TRUE	0.391144	0.642939	0.251795
cg16265859	37	1	19401069	UBR4	NM_020765	3'UTR					TRUE	0.354472	0.614807	0.260335
cg12766383	37	1	19403306	UBR4	NM_020765	Body					TRUE	0.49694	0.931482	0.434542
cg10174138	37	1	19408685	UBR4	NM_020765	Body						0.518478	0.849688	0.33121
cg08937734	37	1	19422904	UBR4	NM_020765	Body					TRUE	0.306606	0.639219	0.332613
cg08814913	37	1	19530176	UBR4	NM_020765	Body						0.434006	0.750127	0.316121
cg07447773	37	1	19614851	AKR7A3	NM_012067	Body	chr1:19614998-19615660	N_Shore			TRUE	0.260717	0.537809	0.277092
cg05348366	37	1	19665184				chr1:19665010-19665276	Island			TRUE	0.507471	0.846543	0.339072
cg12688942	37	1	19680353	CAPZB	NM_004930	Body					TRUE	0.392674	0.822419	0.429745
cg24593138	37	1	19687988	CAPZB	NM_004930	Body					TRUE	0.3119	0.663871	0.351971
cg15781526	37	1	19688050	CAPZB;CAPZB;CAPZB;CAPZB	NM_001206541;NM_001282162;NM_004930;NM_001206540	Body;Body;Body;Body						0.484391	0.853683	0.369292
cg07905985	37	1	19688056	CAPZB	NM_004930	Body					TRUE	0.470899	0.921754	0.450855
cg16075800	37	1	19693784	CAPZB;CAPZB;CAPZB;CAPZB	NM_001206541;NM_001282162;NM_004930;NM_001206540	Body;Body;Body;Body						0.266042	0.628722	0.36268
cg04932329	37	1	19693961	CAPZB	NM_004930	Body					TRUE	0.422663	0.864165	0.441502
cg15710646	37	1	19712335	CAPZB;CAPZB;CAPZB;CAPZB	NM_001206541;NM_001282162;NM_004930;NM_001206540	Body;Body;Body;Body						0.478483	0.89155	0.413067
cg17429182	37	1	19714606	CAPZB;CAPZB;CAPZB;CAPZB	NM_001206541;NM_001282162;NM_004930;NM_001206540	Body;Body;Body;Body						0.539426	0.86703	0.327605
cg08828431	37	1	19746353	CAPZB;CAPZB;CAPZB;CAPZB	NM_001206541;NM_001282162;NM_004930;NM_001206540	Body;Body;Body;Body						0.347225	0.746177	0.398952
cg25808494	37	1	19746405	CAPZB;CAPZB;CAPZB;CAPZB	NM_001206541;NM_001282162;NM_004930;NM_001206540	Body;Body;Body;Body						0.4907	0.811565	0.320865
cg13319175	37	1	19746564	CAPZB	NM_004930	Body					TRUE	0.509754	0.777747	0.267993
cg06788764	37	1	19756350	CAPZB	NM_004930	Body					TRUE	0.309476	0.568003	0.258527
cg12141340	37	1	19890415								TRUE	0.273633	0.550792	0.277158
cg20248822	37	1	19922867	C1orf151	NM_001032363	TSS1500	chr1:19923341-19924002	N_Shore			TRUE	0.234421	0.491822	0.257401
cg24616450	37	1	19940140	MINOS1;MINOS1;MINOS1-NBL1;MINOS1;MINOS1;MINOS1;MINOS1-NBL1	NR_033758;NR_033757;NM_001204089;NM_001204083;NM_001032363;NM_001204082;NM_001204088	Body;Body;5'UTR;Body;Body;Body;Body						0.639691	0.910436	0.270745
cg21789695	37	1	19945158	C1orf151	NM_001032363	Body					TRUE	0.420049	0.902421	0.482372
cg03517918	37	1	19946398	C1orf151	NM_001032363	Body					TRUE	0.469134	0.846267	0.377133
cg03438613	37	1	19966971	MINOS1-NBL1;MINOS1-NBL1	NM_001204089;NM_001204088	5'UTR;Body	chr1:19970255-19971923	N_Shelf				0.431894	0.799895	0.368001
cg21813747	37	1	19969931	NBL1;NBL1	NM_005380;NM_182744	TSS1500;Body	chr1:19970255-19971923	N_Shore			TRUE	0.262299	0.557087	0.294788
cg04604347	37	1	19970020	NBL1;NBL1;NBL1;MINOS1-NBL1;MINOS1-NBL1;NBL1;NBL1;NBL1	NM_005380;NM_001278165;NM_001204084;NM_001204089;NM_001204088;NM_001278164;NM_182744;NM_001278165	TSS1500;1stExon;TSS200;5'UTR;Body;5'UTR;Body;5'UTR	chr1:19970255-19971923	N_Shore				0.319281	0.596687	0.277406
cg22767145	37	1	19970024	NBL1;NBL1;NBL1;MINOS1-NBL1;MINOS1-NBL1;NBL1;NBL1;NBL1	NM_005380;NM_001278165;NM_001204084;NM_001204089;NM_001204088;NM_001278164;NM_182744;NM_001278165	TSS1500;1stExon;TSS200;5'UTR;Body;5'UTR;Body;5'UTR	chr1:19970255-19971923	N_Shore				0.359272	0.644433	0.285161
cg15589641	37	1	19971984	NBL1;NBL1;MINOS1-NBL1;MINOS1-NBL1;NBL1;NBL1;NBL1;NBL1;NBL1;NBL1	NM_001204086;NM_001204085;NM_001204089;NM_001204088;NM_001278164;NM_182744;NM_001278165;NM_001204084;NM_005380;NM_001204085	TSS1500;1stExon;5'UTR;Body;5'UTR;Body;5'UTR;5'UTR;5'UTR;5'UTR	chr1:19970255-19971923	S_Shore				0.167939	0.422912	0.254974
cg03950225	37	1	19974130	NBL1;NBL1;NBL1;MINOS1-NBL1;MINOS1-NBL1;NBL1;NBL1;NBL1;NBL1;NBL1;NBL1	NM_001204086;NM_001278166;NM_001278166;NM_001204089;NM_001204088;NM_001278164;NM_182744;NM_001278165;NM_001204084;NM_005380;NM_001204085	Body;1stExon;5'UTR;5'UTR;Body;5'UTR;Body;5'UTR;5'UTR;5'UTR;5'UTR	chr1:19970255-19971923	S_Shelf				0.357739	0.649348	0.291608
cg14714346	37	1	19974176	NBL1;NBL1;MINOS1-NBL1;MINOS1-NBL1;NBL1;NBL1;NBL1;NBL1;NBL1;NBL1	NM_001204086;NM_001278166;NM_001204089;NM_001204088;NM_001278164;NM_182744;NM_001278165;NM_001204084;NM_005380;NM_001204085	Body;5'UTR;5'UTR;Body;5'UTR;Body;5'UTR;5'UTR;5'UTR;5'UTR	chr1:19970255-19971923	S_Shelf				0.257759	0.615231	0.357472
cg25368276	37	1	19977123	NBL1;NBL1;MINOS1-NBL1;MINOS1-NBL1;NBL1;NBL1;NBL1;NBL1;NBL1;NBL1	NM_001204086;NM_001278166;NM_001204089;NM_001204088;NM_001278164;NM_182744;NM_001278165;NM_001204084;NM_005380;NM_001204085	Body;5'UTR;5'UTR;Body;5'UTR;Body;5'UTR;5'UTR;5'UTR;5'UTR						0.134561	0.416936	0.282375
cg02214003	37	1	19977445	NBL1;NBL1;MINOS1-NBL1;MINOS1-NBL1;NBL1;NBL1;NBL1;NBL1;NBL1;NBL1	NM_001204086;NM_001278166;NM_001204089;NM_001204088;NM_001278164;NM_182744;NM_001278165;NM_001204084;NM_005380;NM_001204085	Body;5'UTR;5'UTR;Body;5'UTR;Body;5'UTR;5'UTR;5'UTR;5'UTR						0.196251	0.597762	0.40151
cg05748047	37	1	19989665				chr1:19991146-19992788	N_Shore				0.165454	0.505667	0.340213
cg22416183	37	1	19990826	HTR6	NM_000871	TSS1500	chr1:19991146-19992788	N_Shore				0.422363	0.695179	0.272816
cg13736252	37	1	20024962	TMCO4	NM_181719	Body						0.476145	0.819178	0.343033
cg17342623	37	1	20061110	TMCO4	NM_181719	Body						0.370335	0.64779	0.277455
cg14220777	37	1	20062329	TMCO4	NM_181719	Body					TRUE	0.254644	0.613199	0.358555
cg03436326	37	1	20064683	TMCO4	NM_181719	Body						0.560525	0.848763	0.288238
cg19405042	37	1	20066292	TMCO4	NM_181719	Body						0.462221	0.872753	0.410532
cg23214395	37	1	20141778	RNF186	NM_019062	TSS200					TRUE	0.339371	0.72422	0.384849
cg05393025	37	1	20141781	RNF186	NM_019062	TSS200					TRUE	0.359655	0.689227	0.329572
cg18898531	37	1	20188723									0.420871	0.717788	0.296918
cg26716805	37	1	20198959									0.269032	0.540642	0.271611
cg16660306	37	1	20204469									0.491406	0.917345	0.425939
cg12394941	37	1	20205035				chr1:20208807-20209462	N_Shelf			TRUE	0.216951	0.522903	0.305951
cg15602420	37	1	20205059				chr1:20208807-20209462	N_Shelf			TRUE	0.230893	0.516956	0.286063
cg16764824	37	1	20205287				chr1:20208807-20209462	N_Shelf				0.365447	0.619452	0.254005
cg03134147	37	1	20209848	OTUD3	NM_015207	Body	chr1:20208807-20209462	S_Shore			TRUE	0.198249	0.475732	0.277483
cg22805515	37	1	20513808	UBXN10-AS1;UBXN10	NR_110078;NM_152376	TSS1500;5'UTR	chr1:20512360-20512797	S_Shore				0.361983	0.66213	0.300148
cg17425580	37	1	20521101								TRUE	0.32397	0.71945	0.39548
cg22333412	37	1	20569456				chr1:20569455-20569817	Island			TRUE	0.411393	0.700177	0.288784
cg19924611	37	1	20685611									0.249693	0.527644	0.277951
cg08831718	37	1	20685618									0.306518	0.661479	0.354961
cg26264372	37	1	20702161	LINC01141	NR_033887	Body						0.380066	0.643464	0.263398
cg08394698	37	1	20857663									0.293032	0.659472	0.36644
cg17120881	37	1	20882137				chr1:20878894-20880592	S_Shore		chr1:20881978-20881978		0.217488	0.51219	0.294702
cg20001666	37	1	20990821	KIF17;KIF17	NM_020816;NM_001122819	3'UTR;3'UTR	chr1:20987516-20988238	S_Shelf			TRUE	0.642727	0.895443	0.252717
cg20174293	37	1	20991117	KIF17;KIF17;KIF17	NM_001287212;NM_001122819;NM_020816	Body;Body;Body	chr1:20987516-20988238	S_Shelf				0.434333	0.895741	0.461409
cg13305458	37	1	21050467	SH2D5;SH2D5	NM_001103161;NM_001103160	Body;Body					TRUE	0.411728	0.830946	0.419218
cg11816566	37	1	21050526	SH2D5;SH2D5	NM_001103161;NM_001103160	Body;Body					TRUE	0.442378	0.843236	0.400857
cg24673385	37	1	21051448	SH2D5;SH2D5	NM_001103161;NM_001103160	Body;Body					TRUE	0.447861	0.740023	0.292162
cg15825104	37	1	21062090				chr1:21058006-21059366	S_Shelf			TRUE	0.658276	0.926798	0.268522
cg05484121	37	1	21107971	HP1BP3	NM_016287	5'UTR						0.341243	0.647162	0.30592
cg26379429	37	1	21227287	EIF4G3;EIF4G3;EIF4G3	NM_001198802;NM_003760;NM_001198801	Body;Body;Body						0.353075	0.681149	0.328074
cg08705351	37	1	21384744	EIF4G3;EIF4G3;EIF4G3;EIF4G3	NM_003760;NM_001198803;NM_001198802;NM_001198801	5'UTR;5'UTR;5'UTR;5'UTR						0.335928	0.671249	0.335321
cg08752986	37	1	21416170	EIF4G3;EIF4G3;EIF4G3;EIF4G3	NM_003760;NM_001198803;NM_001198802;NM_001198801	5'UTR;5'UTR;5'UTR;5'UTR						0.46077	0.725605	0.264835
cg21761307	37	1	21475984	EIF4G3;EIF4G3;EIF4G3	NM_001198803;NM_001198802;NM_001198801	5'UTR;5'UTR;5'UTR				chr1:21475659-21475659		0.110148	0.377243	0.267095
cg08692046	37	1	21501347	EIF4G3;EIF4G3;EIF4G3	NM_001198803;NM_001198802;NM_001198801	TSS200;5'UTR;5'UTR	chr1:21503115-21503836	N_Shore				0.102169	0.393564	0.291395
cg09046664	37	1	21501349	EIF4G3;EIF4G3;EIF4G3	NM_001198803;NM_001198802;NM_001198801	TSS200;5'UTR;5'UTR	chr1:21503115-21503836	N_Shore				0.138407	0.473813	0.335405
cg13151223	37	1	21584127	ECE1;ECE1;ECE1;ECE1	NM_001113347;NM_001113349;NM_001397;NM_001113348	Body;Body;Body;Body						0.384867	0.857721	0.472854
cg04114429	37	1	21584380	ECE1;ECE1;ECE1;ECE1	NM_001113347;NM_001113349;NM_001397;NM_001113348	Body;Body;Body;Body						0.431053	0.887585	0.456532
cg13562122	37	1	21587009	ECE1;ECE1;ECE1;ECE1	NM_001113347;NM_001397;NM_001113349;NM_001113348	Body;Body;Body;Body					TRUE	0.652714	0.909758	0.257044
cg26467313	37	1	21596298	ECE1;ECE1;ECE1;ECE1	NM_001113347;NM_001113349;NM_001397;NM_001113348	Body;Body;Body;Body						0.296186	0.582709	0.286523
cg11834658	37	1	21611224	ECE1;ECE1;ECE1	NM_001397;NM_001113349;NM_001113348	Body;Body;Body				chr1:21611199-21611199	TRUE	0.554664	0.851581	0.296917
cg10820600	37	1	21628909	ECE1	NM_001113348	Body						0.458627	0.893813	0.435186
cg01383475	37	1	21634438	ECE1	NM_001113348	Body						0.396948	0.813141	0.416194
cg00964400	37	1	21634838	ECE1	NM_001113348	Body					TRUE	0.18352	0.463876	0.280355
cg23347052	37	1	21636037	ECE1	NM_001113348	Body						0.306617	0.679154	0.372537
cg08421373	37	1	21640565	ECE1	NM_001113348	Body						0.23534	0.583986	0.348646
cg17445490	37	1	21642517	ECE1	NM_001113348	Body					TRUE	0.37896	0.908204	0.529244
cg14557415	37	1	21655777	ECE1	NM_001113348	Body						0.339902	0.760612	0.42071
cg14444313	37	1	21850012	ALPL;ALPL;ALPL	NM_000478;NM_001177520;NM_001127501	5'UTR;5'UTR;5'UTR						0.467498	0.89285	0.425353
cg01863337	37	1	21861252	ALPL;ALPL;ALPL	NM_000478;NM_001177520;NM_001127501	5'UTR;5'UTR;5'UTR						0.487362	0.905559	0.418197
cg09859596	37	1	21868624	ALPL	NM_000478	5'UTR					TRUE	0.249959	0.500241	0.250283
cg06735585	37	1	21870267	ALPL;ALPL;ALPL	NM_000478;NM_001177520;NM_001127501	5'UTR;5'UTR;5'UTR						0.357137	0.844764	0.487627
cg24863176	37	1	21919208									0.397488	0.691658	0.294171
cg10076161	37	1	21946566	RAP1GAP;RAP1GAP;RAP1GAP	NM_001145658;NM_002885;NM_001145657	Body;5'UTR;5'UTR	chr1:21948674-21949263	N_Shelf				0.586298	0.870163	0.283865
cg11285442	37	1	21953340	RAP1GAP;RAP1GAP;RAP1GAP	NM_001145658;NM_002885;NM_001145657	Body;5'UTR;5'UTR						0.549655	0.804364	0.254708
cg04142080	37	1	21977904	RAP1GAP;RAP1GAP;RAP1GAP	NM_001145658;NM_002885;NM_001145657	Body;5'UTR;5'UTR	chr1:21978101-21978764	N_Shore			TRUE	0.485325	0.770144	0.284819
cg05686902	37	1	21982651	RAP1GAP;RAP1GAP	NM_002885;NM_001145657	5'UTR;5'UTR	chr1:21978101-21978764	S_Shelf				0.507845	0.91111	0.403266
cg09735269	37	1	22007588	USP48	NM_032236	Body						0.202136	0.470219	0.268083
cg06757381	37	1	22110392	USP48;USP48	NM_001032730;NM_032236	TSS1500;TSS1500	chr1:22109129-22110261	S_Shore				0.161287	0.481413	0.320126
cg08862774	37	1	22110598	USP48;USP48	NM_001032730;NM_032236	TSS1500;TSS1500	chr1:22109129-22110261	S_Shore				0.292647	0.643204	0.350556
cg15016750	37	1	22130383									0.341215	0.782289	0.441074
cg13098493	37	1	22158028	HSPG2;HSPG2	NM_005529;NM_001291860	Body;Body	chr1:22155300-22155565	S_Shelf				0.434501	0.701131	0.26663
cg07724088	37	1	22169667	HSPG2;HSPG2	NM_005529;NM_001291860	Body;Body						0.330915	0.709176	0.378262
cg14153041	37	1	22231285	HSPG2;HSPG2	NM_005529;NM_001291860	Body;Body						0.356785	0.608196	0.251411
cg13215285	37	1	22237254	HSPG2	NM_005529	Body					TRUE	0.222301	0.57532	0.353018
cg14888607	37	1	22240381	HSPG2;HSPG2	NM_005529;NM_001291860	Body;Body						0.287877	0.624243	0.336366
cg00653809	37	1	22266353							chr1:22266159-22266159		0.09441	0.357885	0.263475
cg12909057	37	1	22301489									0.223692	0.558247	0.334556
cg23156486	37	1	22310773	CELA3B	NM_007352	Body						0.463082	0.744442	0.28136
cg16087947	37	1	22333957	CELA3A	NM_005747	Body						0.394525	0.738892	0.344367
cg16139598	37	1	22353246	LINC00339;LINC00339;LINC00339;LINC00339;LINC00339;LINC00339;LOC101928043	NR_023918;NR_023919;NR_109762;NR_109761;NR_109760;NR_109759;NR_110692	Body;Body;Body;Body;Body;Body;TSS1500	chr1:22351917-22352194	S_Shore				0.519049	0.786529	0.26748
cg07663260	37	1	22369676									0.452819	0.911752	0.458933
cg07033286	37	1	22432629								TRUE	0.508783	0.776689	0.267906
cg01781529	37	1	22444030	WNT4	NM_030761	3'UTR	chr1:22446520-22446943	N_Shelf			TRUE	0.242318	0.555571	0.313253
cg05600023	37	1	22448373	WNT4	NM_030761	Body	chr1:22446520-22446943	S_Shore			TRUE	0.292289	0.627985	0.335695
cg00463617	37	1	22448437	WNT4	NM_030761	Body	chr1:22446520-22446943	S_Shore				0.573216	0.924246	0.351031
cg19403005	37	1	22457820	WNT4	NM_030761	Body	chr1:22456023-22456225	S_Shore			TRUE	0.52889	0.810402	0.281512
cg26924480	37	1	22463884	WNT4	NM_030761	Body					TRUE	0.398418	0.749317	0.350899
cg13692526	37	1	22470499	WNT4	NM_030761	TSS1500	chr1:22468912-22470252	S_Shore				0.300155	0.607026	0.306871
cg02532717	37	1	22470555	WNT4	NM_030761	TSS1500	chr1:22468912-22470252	S_Shore				0.500784	0.791394	0.290609
cg14337167	37	1	22490967									0.531815	0.845135	0.31332
cg11418526	37	1	22493637									0.49141	0.879678	0.388268
cg05164961	37	1	22498563									0.483367	0.851746	0.368379
cg18209431	37	1	22498933									0.329789	0.778411	0.448622
cg20708037	37	1	22559911									0.457527	0.801425	0.343899
cg20525710	37	1	22564574									0.403089	0.825869	0.42278
cg01599140	37	1	22568254									0.646853	0.921451	0.274598
cg03044367	37	1	22581534								TRUE	0.36678	0.631934	0.265153
cg22960582	37	1	22599253									0.420825	0.771648	0.350823
cg07500170	37	1	22676140									0.476607	0.854418	0.377811
cg00724947	37	1	22718276									0.427076	0.786165	0.359089
cg02767912	37	1	22781214	ZBTB40;ZBTB40	NM_014870;NM_001083621	5'UTR;5'UTR	chr1:22778236-22778817	S_Shelf				0.423945	0.846697	0.422753
cg07397757	37	1	22797898	ZBTB40;ZBTB40	NM_014870;NM_001083621	5'UTR;5'UTR						0.247436	0.608617	0.361182
cg27579233	37	1	22827348	ZBTB40;ZBTB40	NM_014870;NM_001083621	Body;Body					TRUE	0.193007	0.541932	0.348925
cg15061159	37	1	22871587								TRUE	0.416442	0.834951	0.418509
cg27584013	37	1	23012439								TRUE	0.289456	0.601043	0.311587
cg23593824	37	1	23073894	EPHB2;EPHB2;EPHB2;EPHB2	NM_017449;NM_001309192;NM_004442;NM_001309193	Body;Body;Body;Body						0.341382	0.656141	0.31476
cg14737694	37	1	23100495	EPHB2;EPHB2;EPHB2;EPHB2	NM_017449;NM_001309192;NM_004442;NM_001309193	Body;Body;Body;Body						0.370068	0.624358	0.25429
cg19818699	37	1	23126727	EPHB2;EPHB2;EPHB2;EPHB2	NM_017449;NM_001309192;NM_004442;NM_001309193	Body;Body;Body;Body						0.589536	0.840216	0.25068
cg03564760	37	1	23130646	EPHB2;EPHB2;EPHB2;EPHB2	NM_017449;NM_001309192;NM_004442;NM_001309193	Body;Body;Body;Body						0.609679	0.890077	0.280397
cg00721416	37	1	23155597	EPHB2;EPHB2;EPHB2;EPHB2	NM_017449;NM_001309192;NM_004442;NM_001309193	Body;Body;Body;Body						0.208564	0.514034	0.30547
cg09374987	37	1	23156746	EPHB2;EPHB2;EPHB2;EPHB2	NM_017449;NM_001309192;NM_004442;NM_001309193	Body;Body;Body;Body						0.30514	0.631747	0.326607
cg16023894	37	1	23156855	EPHB2;EPHB2;EPHB2;EPHB2	NM_017449;NM_001309192;NM_004442;NM_001309193	Body;Body;Body;Body						0.390361	0.848545	0.458184
cg08264906	37	1	23197180	EPHB2;EPHB2	NM_004442;NM_017449	Body;Body					TRUE	0.219928	0.508823	0.288895
cg05628908	37	1	23197319	EPHB2;EPHB2;EPHB2;EPHB2	NM_017449;NM_001309192;NM_004442;NM_001309193	Body;Body;Body;Body						0.316834	0.60958	0.292746
cg04801097	37	1	23205368	EPHB2;EPHB2;EPHB2;EPHB2	NM_017449;NM_001309192;NM_004442;NM_001309193	Body;Body;Body;Body						0.421841	0.868632	0.446791
cg06271655	37	1	23370513	MIR3115;KDM1A;KDM1A	NR_036057;NM_015013;NM_001009999	TSS1500;Body;Body						0.552875	0.869403	0.316528
cg00209355	37	1	23370587	MIR3115;KDM1A;KDM1A	NR_036057;NM_015013;NM_001009999	TSS1500;Body;Body						0.518974	0.860275	0.341301
cg23271558	37	1	23405725	KDM1A;KDM1A	NM_015013;NM_001009999	Body;Body					TRUE	0.354605	0.847124	0.492519
cg23660062	37	1	23638498	HNRNPR;HNRNPR;HNRNPR;HNRNPR;HNRNPR;HNRNPR;HNRNPR	NM_001102399;NM_001102397;NM_001297622;NM_001297621;NM_005826;NM_001297620;NM_001102398	Body;Body;Body;Body;Body;Body;Body						0.418344	0.888403	0.470059
cg10347418	37	1	23693926	ZNF436;ZNF436	NM_001077195;NM_030634	Body;Body	chr1:23694690-23696050	N_Shore			TRUE	0.428038	0.838993	0.410955
cg16240683	37	1	23697258	C1orf213;C1orf213;C1orf213;ZNF436	NM_138479;NM_001008896;NM_138479;NM_001077195	3'UTR;Body;1stExon;TSS1500	chr1:23694690-23696050	S_Shore			TRUE	0.20287	0.556888	0.354019
cg16696234	37	1	23697297	C1orf213;C1orf213;C1orf213;ZNF436	NM_138479;NM_001008896;NM_138479;NM_001077195	3'UTR;Body;1stExon;TSS1500	chr1:23694690-23696050	S_Shore			TRUE	0.234354	0.554388	0.320034
cg22502492	37	1	23697506	C1orf213;C1orf213;C1orf213;ZNF436	NM_138479;NM_001008896;NM_138479;NM_001077195	3'UTR;Body;1stExon;TSS1500	chr1:23694690-23696050	S_Shore			TRUE	0.243708	0.589515	0.345807
cg20150640	37	1	23697656	C1orf213;C1orf213;C1orf213;ZNF436	NM_138479;NM_001008896;NM_138479;NM_001077195	3'UTR;Body;1stExon;TSS1500	chr1:23694690-23696050	S_Shore			TRUE	0.17231	0.522076	0.349766
cg26747536	37	1	23703794									0.234427	0.644815	0.410388
cg00463859	37	1	23750101	TCEA3	NM_003196	Body	chr1:23750508-23751663	N_Shore			TRUE	0.15632	0.455538	0.299217
cg01502115	37	1	23777895	ASAP3;ASAP3	NM_017707;NM_001143778	Body;Body						0.568934	0.819617	0.250683
cg24254937	37	1	23858301	E2F2	NM_004091	TSS1500	chr1:23857033-23858089	S_Shore			TRUE	0.313704	0.691002	0.377298
cg24777046	37	1	23882632				chr1:23881017-23881755	S_Shore		chr1:23882500-23882500		0.291994	0.578607	0.286613
cg04789201	37	1	23943848				chr1:23945941-23946295	N_Shelf				0.422335	0.706314	0.28398
cg18418928	37	1	23953778	MDS2	NR_027042	TSS200					TRUE	0.490038	0.827736	0.337697
cg23378736	37	1	23953785	MDS2	NR_027042	TSS200						0.36848	0.687134	0.318653
cg24406162	37	1	24017943	RPL11	NM_000975	TSS1500	chr1:24018355-24018567	N_Shore			TRUE	0.154546	0.427086	0.27254
cg24502901	37	1	24086220	TCEB3	NM_003198	3'UTR					TRUE	0.612125	0.871629	0.259504
cg10961323	37	1	24127976	GALE;GALE	NM_000403;NM_001008216	TSS1500;TSS1500	chr1:24126799-24127549	S_Shore			TRUE	0.263163	0.568128	0.304964
cg21523719	37	1	24128335	GALE;GALE	NM_000403;NM_001008216	TSS1500;TSS1500	chr1:24126799-24127549	S_Shore			TRUE	0.505157	0.872142	0.366985
cg16976865	37	1	24128432	GALE;GALE;HMGCL;HMGCL	NM_000403;NM_001008216;NM_000191;NM_001166059	TSS1500;TSS1500;3'UTR;3'UTR	chr1:24126799-24127549	S_Shore				0.179412	0.463711	0.284299
cg18888403	37	1	24152774	HMGCL;HMGCL	NM_000191;NM_001166059	TSS1500;TSS1500					TRUE	0.520607	0.793533	0.272926
cg22010547	37	1	24235907	CNR2	NM_001841	5'UTR						0.341655	0.614533	0.272878
cg12569845	37	1	24277991									0.340812	0.68169	0.340879
cg03210579	37	1	24311230									0.175847	0.441516	0.265669
cg27582384	37	1	24345233									0.225588	0.57867	0.353082
cg05532310	37	1	24393517	MYOM3;MYOM3	NM_152372;NM_152372	ExonBnd;Body						0.474937	0.783091	0.308154
cg23180393	37	1	24401973	MYOM3;MYOM3	NM_152372;NM_152372	ExonBnd;Body						0.445329	0.712085	0.266756
cg26933112	37	1	24429773	MYOM3	NM_152372	Body						0.475334	0.881969	0.406635
cg09152089	37	1	24469564	IL22RA1	NM_021258	1stExon					TRUE	0.157981	0.450784	0.292803
cg22588023	37	1	24469840	IL22RA1	NM_021258	TSS200						0.18752	0.569805	0.382285
cg18443350	37	1	24470396	IL22RA1	NM_021258	TSS1500						0.61543	0.873146	0.257716
cg24435747	37	1	24514557	IL28RA;IL28RA;IL28RA	NM_173065;NM_173064;NM_170743	TSS1500;TSS1500;TSS1500	chr1:24513540-24514477	S_Shore			TRUE	0.277379	0.56466	0.287281
cg01960748	37	1	24522592								TRUE	0.377274	0.847906	0.470632
cg15571353	37	1	24528833	LOC284632	NR_027087	Body					TRUE	0.165852	0.443585	0.277733
cg10466522	37	1	24532605	LOC284632	NR_027087	Body						0.357669	0.677526	0.319856
cg00728438	37	1	24620475									0.478508	0.875221	0.396714
cg23213449	37	1	24627488								TRUE	0.348829	0.74352	0.394692
cg05525016	37	1	24628374									0.187883	0.516568	0.328686
cg11067453	37	1	24637997								TRUE	0.48507	0.786621	0.301551
cg13987674	37	1	24649494	GRHL3;GRHL3;GRHL3	NM_198174;NM_198173;NM_021180	TSS200;Body;TSS200	chr1:24648202-24648985	S_Shore			TRUE	0.506757	0.794717	0.28796
cg17044643	37	1	24661817	GRHL3;GRHL3;GRHL3;GRHL3	NM_198173;NM_198174;NM_021180;NM_001195010	Body;Body;Body;Body						0.606336	0.896815	0.290479
cg19696536	37	1	24677153	GRHL3;GRHL3;GRHL3;GRHL3	NM_198173;NM_198174;NM_021180;NM_001195010	Body;Body;Body;Body						0.492353	0.763241	0.270888
cg18304908	37	1	24682169	GRHL3	NM_198174	Body						0.551716	0.884964	0.333248
cg12855555	37	1	24700385	STPG1;STPG1;STPG1;STPG1	NM_001199014;NM_178122;NM_001199013;NM_001199012	Body;Body;Body;Body						0.460827	0.857998	0.39717
cg01674792	37	1	24706508	STPG1;STPG1;STPG1;STPG1	NM_001199014;NM_178122;NM_001199013;NM_001199012	Body;Body;Body;Body						0.477637	0.871633	0.393996
cg04671726	37	1	24741549	STPG1;STPG1;STPG1;NIPAL3;STPG1;STPG1	NM_178122;NM_001199014;NM_001199013;NM_020448;NM_001199012;NM_001199012	TSS1500;TSS1500;TSS1500;TSS1500;1stExon;5'UTR	chr1:24742671-24743039	N_Shore				0.378961	0.656188	0.277227
cg10150518	37	1	24741677	STPG1;STPG1;STPG1;NIPAL3;STPG1	NM_178122;NM_001199014;NM_001199013;NM_020448;NM_001199012	TSS1500;TSS1500;TSS1500;TSS1500;TSS200	chr1:24742671-24743039	N_Shore				0.237309	0.631623	0.394314
cg03893656	37	1	24745138	NIPAL3	NM_020448	5'UTR	chr1:24742671-24743039	S_Shelf				0.659755	0.914324	0.254569
cg16307638	37	1	24745267	NIPAL3	NM_020448	5'UTR	chr1:24742671-24743039	S_Shelf				0.506407	0.89338	0.386973
cg22675447	37	1	24745395	NIPAL3	NM_020448	5'UTR	chr1:24742671-24743039	S_Shelf			TRUE	0.414177	0.735545	0.321368
cg27029507	37	1	24745924	NIPAL3	NM_020448	5'UTR	chr1:24742671-24743039	S_Shelf				0.196499	0.544213	0.347714
cg08507462	37	1	24745979	NIPAL3	NM_020448	5'UTR	chr1:24742671-24743039	S_Shelf				0.330037	0.711049	0.381011
cg12209494	37	1	24746023	NIPAL3	NM_020448	5'UTR	chr1:24742671-24743039	S_Shelf				0.416451	0.853079	0.436628
cg02961394	37	1	24746043	NIPAL3	NM_020448	Body	chr1:24742671-24743039	S_Shelf				0.309052	0.651827	0.342775
cg17316134	37	1	24795615	NIPAL3	NM_020448	Body						0.593315	0.850267	0.256952
cg25566301	37	1	24818258									0.297186	0.565503	0.268316
cg04031455	37	1	24833972	RCAN3;RCAN3;RCAN3;RCAN3;RCAN3;RCAN3;RCAN3	NM_001251978;NM_001251979;NM_001251984;NM_013441;NM_001251977;NM_001251981;NM_001251983	TSS200;5'UTR;5'UTR;5'UTR;5'UTR;5'UTR;5'UTR						0.436477	0.774753	0.338276
cg17398808	37	1	24834209	RCAN3;RCAN3;RCAN3;RCAN3;RCAN3;RCAN3;RCAN3;RCAN3	NM_001251978;NM_001251979;NM_001251984;NM_013441;NM_001251977;NM_001251981;NM_001251983;NM_001251978	1stExon;5'UTR;5'UTR;5'UTR;5'UTR;5'UTR;5'UTR;5'UTR						0.424884	0.914305	0.489421
cg20712532	37	1	24842156	RCAN3;RCAN3;RCAN3;RCAN3;RCAN3;RCAN3;RCAN3;RCAN3;RCAN3;RCAN3	NM_001251984;NM_001251983;NM_013441;NM_001251977;NM_001251981;NM_001251979;NM_001251978;NM_001251985;NM_001251982;NM_001251980	5'UTR;5'UTR;Body;Body;Body;Body;Body;Body;Body;Body						0.319249	0.658438	0.33919
cg10194002	37	1	24878007	LOC100506985	NR_109781	Body						0.594937	0.878199	0.283262
cg09443022	37	1	24920242	NCMAP	NM_001010980	5'UTR						0.279926	0.54893	0.269004
cg07111988	37	1	24971764	SRRM1	NM_005839	Body	chr1:24969027-24970196	S_Shore			TRUE	0.423337	0.814349	0.391012
cg27425146	37	1	25062925								TRUE	0.135439	0.420069	0.28463
cg12483301	37	1	25239107	RUNX3;RUNX3	NM_004350;NM_001031680	Body;Body						0.301268	0.567827	0.266558
cg19253333	37	1	25295652									0.288834	0.596776	0.307942
cg03713378	37	1	25307570									0.376391	0.68107	0.304679
cg08303535	37	1	25369035									0.33229	0.629103	0.296814
cg25214458	37	1	25467218									0.384641	0.644499	0.259858
cg10881566	37	1	25521090									0.311221	0.592077	0.280856
cg22322089	37	1	25545505									0.487583	0.912989	0.425406
cg20684491	37	1	25596433				chr1:25593957-25594487	S_Shore			TRUE	0.368152	0.690783	0.322631
cg15331751	37	1	25674235	TMEM50A	NM_014313	Body						0.415699	0.744345	0.328646
cg11164998	37	1	25682428	TMEM50A	NM_014313	Body						0.601447	0.877317	0.27587
cg13075537	37	1	25810696	TMEM57	NM_018202	Body					TRUE	0.328696	0.70855	0.379855
cg19062982	37	1	25830432									0.303265	0.569567	0.266302
cg12446045	37	1	25857419								TRUE	0.423339	0.7695	0.346161
cg08450732	37	1	25887596	LDLRAP1	NM_015627	Body						0.324977	0.70956	0.384584
cg18792528	37	1	25893735	LDLRAP1	NM_015627	3'UTR					TRUE	0.411899	0.775043	0.363144
cg08820956	37	1	25893744	LDLRAP1	NM_015627	3'UTR						0.292841	0.59817	0.30533
cg21452808	37	1	25900135								TRUE	0.272286	0.629797	0.35751
cg02890896	37	1	25941529				chr1:25942661-25943191	N_Shore			TRUE	0.627158	0.900968	0.27381
cg24637425	37	1	25978824	MAN1C1;MAN1C1	NM_020379;NM_001289010	Body;Body						0.354076	0.802261	0.448185
cg00988691	37	1	25985636	MAN1C1;MAN1C1	NM_020379;NM_001289010	Body;Body						0.192306	0.480656	0.28835
cg02156070	37	1	25985801	MAN1C1;MAN1C1	NM_020379;NM_001289010	Body;Body						0.24274	0.612216	0.369476
cg02072300	37	1	25985818	MAN1C1;MAN1C1	NM_020379;NM_001289010	Body;Body						0.172068	0.483072	0.311003
cg23607810	37	1	25999385	MAN1C1;MAN1C1	NM_020379;NM_001289010	Body;Body						0.384459	0.7001	0.315641
cg05706594	37	1	26015454	MAN1C1;MAN1C1	NM_020379;NM_001289010	Body;Body						0.311346	0.614437	0.303092
cg17996919	37	1	26024404	MAN1C1;MAN1C1	NM_020379;NM_001289010	Body;Body						0.412632	0.84299	0.430358
cg03257180	37	1	26026745	MAN1C1;MAN1C1	NM_020379;NM_001289010	Body;Body						0.210089	0.607	0.39691
cg27417589	37	1	26049957	MAN1C1;MAN1C1	NM_020379;NM_001289010	Body;Body						0.277676	0.65938	0.381703
cg09661733	37	1	26085397	MAN1C1;MAN1C1	NM_020379;NM_001289010	Body;Body						0.528963	0.904349	0.375386
cg14635440	37	1	26085472	MAN1C1;MAN1C1	NM_020379;NM_001289010	Body;Body						0.547762	0.926173	0.378411
cg08028384	37	1	26091858	MAN1C1;MAN1C1	NM_020379;NM_001289010	Body;Body						0.357807	0.623582	0.265775
cg12534265	37	1	26092973	MAN1C1;MAN1C1	NM_020379;NM_001289010	Body;Body						0.420873	0.892652	0.47178
cg08690926	37	1	26096521	MAN1C1;MAN1C1	NM_020379;NM_001289010	Body;Body	chr1:26097904-26098107	N_Shore				0.445441	0.871988	0.426548
cg09314770	37	1	26104040	MAN1C1;MAN1C1	NM_020379;NM_001289010	Body;Body						0.564977	0.914108	0.349131
cg08304059	37	1	26145437	FAM54B;FAM54B;FAM54B	NM_001099625;NM_001099627;NM_019557	TSS1500;TSS1500;TSS1500	chr1:26146122-26147349	N_Shore			TRUE	0.128137	0.388442	0.260304
cg08579619	37	1	26145578	MTFR1L;MTFR1L;MTFR1L	NM_001099627;NM_001099625;NM_019557	TSS1500;TSS1500;TSS1500	chr1:26146122-26147349	N_Shore				0.204999	0.515965	0.310966
cg14930790	37	1	26153345	MTFR1L;MTFR1L;MTFR1L;MTFR1L	NM_001099627;NM_019557;NM_001099626;NM_001099625	Body;Body;Body;Body						0.593664	0.876094	0.28243
cg07551314	37	1	26190155	PAQR7	NM_178422	Body	chr1:26185472-26186356	S_Shelf			TRUE	0.621318	0.915534	0.294216
cg19906087	37	1	26194426	PAQR7	NM_178422	5'UTR						0.58562	0.901403	0.315782
cg15662251	37	1	26197855	PAQR7	NM_178422	TSS200	chr1:26201722-26202516	N_Shelf			TRUE	0.300348	0.564138	0.26379
cg23799313	37	1	26198360	PAQR7	NM_178422	TSS1500	chr1:26201722-26202516	N_Shelf			TRUE	0.25682	0.685869	0.429048
cg04264167	37	1	26199754				chr1:26201722-26202516	N_Shore				0.542952	0.866414	0.323462
cg24377160	37	1	26202779				chr1:26201722-26202516	S_Shore				0.315778	0.629033	0.313256
cg03889165	37	1	26202940				chr1:26201722-26202516	S_Shore				0.392432	0.813058	0.420625
cg08741329	37	1	26203802				chr1:26201722-26202516	S_Shore				0.438105	0.726664	0.28856
cg06631999	37	1	26217268	STMN1	NM_001145454	Body					TRUE	0.46401	0.90694	0.44293
cg01130040	37	1	26225987	STMN1	NM_001145454	Body						0.457437	0.886573	0.429136
cg07501506	37	1	26226649	STMN1;STMN1;STMN1;STMN1	NM_203399;NM_203401;NM_005563;NM_001145454	3'UTR;3'UTR;3'UTR;Body					TRUE	0.328843	0.771951	0.443108
cg08134856	37	1	26233709	STMN1;STMN1;STMN1;STMN1	NM_005563;NM_203399;NM_203401;NM_001145454	TSS1500;TSS1500;TSS1500;TSS1500	chr1:26231950-26233624	S_Shore			TRUE	0.261924	0.514203	0.252279
cg02803556	37	1	26260793									0.537878	0.898989	0.36111
cg22019970	37	1	26325198	PAFAH2	NM_000437	TSS1500	chr1:26324549-26324934	S_Shore			TRUE	0.313424	0.658383	0.344959
cg02387038	37	1	26331716									0.457673	0.845571	0.387898
cg10563103	37	1	26332550									0.362347	0.652525	0.290178
cg25769972	37	1	26336639									0.312507	0.676752	0.364246
cg00469241	37	1	26349445	EXTL1	NM_004455	1stExon						0.497099	0.89927	0.402171
cg04030916	37	1	26349501	EXTL1	NM_004455	1stExon						0.457924	0.881308	0.423383
cg21386414	37	1	26421349								TRUE	0.170131	0.420837	0.250706
cg00201145	37	1	26436760	PDIK1L	NM_001243532	TSS1500	chr1:26437319-26438917	N_Shore				0.262609	0.699939	0.43733
cg19789352	37	1	26484998	FAM110D	NM_024869	TSS1500	chr1:26487807-26488606	N_Shelf				0.441699	0.719833	0.278134
cg15651345	37	1	26495094	ZNF593	NM_015871	TSS1500	chr1:26496179-26496824	N_Shore			TRUE	0.362272	0.650243	0.287971
cg03722802	37	1	26495178	ZNF593	NM_015871	TSS1500	chr1:26496179-26496824	N_Shore			TRUE	0.312052	0.660366	0.348315
cg25229964	37	1	26503623	CNKSR1;CNKSR1	NM_006314;NR_023345	TSS1500;TSS1500					TRUE	0.649466	0.914537	0.265071
cg17330765	37	1	26503778	CNKSR1;CNKSR1	NM_006314;NR_023345	TSS1500;TSS1500					TRUE	0.261896	0.5967	0.334803
cg09890400	37	1	26503858	CNKSR1;CNKSR1	NR_023345;NM_006314	TSS200;TSS200					TRUE	0.36839	0.747598	0.379208
cg26412358	37	1	26503933	CNKSR1;CNKSR1	NR_023345;NM_006314	TSS200;TSS200					TRUE	0.336253	0.715586	0.379333
cg13553204	37	1	26504548	CNKSR1;CNKSR1	NM_006314;NR_023345	Body;Body					TRUE	0.320739	0.692354	0.371614
cg27458471	37	1	26508520	CNKSR1;CNKSR1;CNKSR1	NM_001297648;NM_001297647;NM_006314	5'UTR;Body;Body						0.333282	0.614463	0.281182
cg24771380	37	1	26584041	CEP85;CEP85	NM_022778;NM_001281517	Body;Body						0.487574	0.908353	0.420779
cg21646082	37	1	26603970	CCDC21	NM_022778	3'UTR	chr1:26606362-26606913	N_Shelf			TRUE	0.254604	0.692948	0.438344
cg16801579	37	1	26678508	AIM1L	NM_001039775	5'UTR						0.321021	0.674361	0.35334
cg25118748	37	1	26680590	AIM1L;AIM1L	NM_001039775;NM_001039775	1stExon;5'UTR						0.294677	0.599024	0.304346
cg11060892	37	1	26680635	AIM1L	NM_001039775	TSS200						0.431331	0.857848	0.426516
cg02523880	37	1	26680641	AIM1L	NM_001039775	TSS200						0.415777	0.720203	0.304426
cg12415353	37	1	26680734	AIM1L	NM_001039775	TSS200						0.327178	0.700369	0.373191
cg03990102	37	1	26680798	AIM1L	NM_001039775	TSS200						0.403652	0.796637	0.392985
cg11684558	37	1	26684068				chr1:26686516-26687281	N_Shelf		chr1:26683687-26683687		0.361517	0.723583	0.362067
cg06469533	37	1	26685573				chr1:26686516-26687281	N_Shore				0.179636	0.442525	0.262888
cg08109646	37	1	26698634	ZNF683;ZNF683	NM_001114759;NM_173574	5'UTR;5'UTR					TRUE	0.344992	0.782576	0.437583
cg15978303	37	1	26703385									0.617131	0.871701	0.254571
cg10433052	37	1	26795536	DHDDS;DHDDS	NM_024887;NM_205861	Body;Body	chr1:26798366-26799842	N_Shelf			TRUE	0.435525	0.716588	0.281063
cg26108329	37	1	26797585	DHDDS;HMGN2;DHDDS	NM_205861;NM_005517;NM_024887	3'UTR;TSS1500;3'UTR	chr1:26798366-26799842	N_Shore			TRUE	0.264692	0.523964	0.259272
cg22512670	37	1	26855765	RPS6KA1	NM_002953	TSS1500	chr1:26856191-26856684	N_Shore			TRUE	0.28033	0.552189	0.271858
cg12696808	37	1	26857666	RPS6KA1	NM_002953	Body	chr1:26856191-26856684	S_Shore				0.306591	0.602395	0.295804
cg11238986	37	1	26857668	RPS6KA1	NM_002953	Body	chr1:26856191-26856684	S_Shore				0.325909	0.651808	0.325899
cg24585377	37	1	26857774	RPS6KA1	NM_002953	Body	chr1:26856191-26856684	S_Shore			TRUE	0.329435	0.700256	0.370821
cg05560886	37	1	26871583	RPS6KA1;RPS6KA1	NM_001006665;NM_002953	TSS1500;Body						0.39875	0.846149	0.447399
cg00692755	37	1	26886686	RPS6KA1;RPS6KA1	NM_001006665;NM_002953	Body;Body						0.404515	0.813585	0.40907
cg08243094	37	1	26930419								TRUE	0.52285	0.864765	0.341915
cg03123091	37	1	27080598	ARID1A;ARID1A	NM_006015;NM_139135	Body;Body					TRUE	0.489729	0.828109	0.33838
cg01298304	37	1	27151310				chr1:27153033-27153243	N_Shore			TRUE	0.371058	0.89559	0.524533
cg09376454	37	1	27176567	ZDHHC18	NM_032283	Body						0.592272	0.918473	0.326201
cg21800373	37	1	27176685	ZDHHC18	NM_032283	Body						0.434489	0.843082	0.408593
cg20168954	37	1	27178052	ZDHHC18	NM_032283	Body						0.355645	0.777106	0.421462
cg08079278	37	1	27181462	ZDHHC18	NM_032283	3'UTR						0.442556	0.859345	0.416789
cg03050195	37	1	27183371									0.543148	0.89741	0.354262
cg05683023	37	1	27183789									0.347442	0.840898	0.493456
cg24495650	37	1	27184743							chr1:27184739-27184739		0.351255	0.715088	0.363833
cg10817250	37	1	27185941				chr1:27189912-27190128	N_Shelf		chr1:27185755-27185755	TRUE	0.371618	0.77963	0.408013
cg02242572	37	1	27187994				chr1:27189912-27190128	N_Shore			TRUE	0.290654	0.679913	0.389259
cg13235717	37	1	27188505	SFN	NM_006142	TSS1500	chr1:27189912-27190128	N_Shore			TRUE	0.28936	0.557075	0.267715
cg11348165	37	1	27189270	SFN	NM_006142	TSS1500	chr1:27189912-27190128	N_Shore			TRUE	0.352272	0.724756	0.372484
cg14333454	37	1	27189298	SFN	NM_006142	TSS1500	chr1:27189912-27190128	N_Shore			TRUE	0.344624	0.634043	0.28942
cg13466284	37	1	27189679	SFN;SFN	NM_006142;NM_006142	1stExon;5'UTR	chr1:27189912-27190128	N_Shore			TRUE	0.315505	0.739017	0.423512
cg03421300	37	1	27189787	SFN	NM_006142	1stExon	chr1:27189912-27190128	N_Shore			TRUE	0.450616	0.8697	0.419084
cg07786675	37	1	27189985	SFN	NM_006142	1stExon	chr1:27189912-27190128	Island			TRUE	0.339901	0.644195	0.304294
cg13374701	37	1	27190088	SFN	NM_006142	1stExon	chr1:27189912-27190128	Island			TRUE	0.498979	0.807771	0.308791
cg12583970	37	1	27190330	SFN	NM_006142	1stExon	chr1:27191066-27191911	N_Shore			TRUE	0.435145	0.917186	0.482042
cg22530691	37	1	27194335				chr1:27191066-27191911	S_Shelf			TRUE	0.286211	0.768835	0.482624
cg06294847	37	1	27201533									0.635887	0.90542	0.269533
cg03340174	37	1	27201687									0.531568	0.86436	0.332792
cg24939819	37	1	27217358	GPN2;GPATCH3	NM_018066;NM_022078	TSS1500;3'UTR	chr1:27216161-27217045	S_Shore			TRUE	0.464503	0.73777	0.273267
cg21037311	37	1	27234078									0.34207	0.707089	0.365019
cg16574155	37	1	27287468	C1orf172	NM_152365	TSS1500	chr1:27286065-27287101	S_Shore			TRUE	0.334797	0.683238	0.348441
cg12595401	37	1	27298344								TRUE	0.463475	0.773836	0.310361
cg12502394	37	1	27321663	TRNP1	NM_001013642	3'UTR	chr1:27320127-27321146	S_Shore		chr1:27321452-27321452		0.351068	0.792559	0.441491
cg05116424	37	1	27324982	TRNP1	NM_001013642	3'UTR	chr1:27320127-27321146	S_Shelf			TRUE	0.476854	0.790797	0.313943
cg00176111	37	1	27331151				chr1:27332593-27332982	N_Shore			TRUE	0.57125	0.825759	0.254509
cg14610217	37	1	27334888	FAM46B	NM_052943	Body	chr1:27332593-27332982	S_Shore			TRUE	0.265666	0.592908	0.327242
cg02508229	37	1	27336989	FAM46B	NM_052943	Body	chr1:27338879-27339441	N_Shore			TRUE	0.297292	0.720374	0.423082
cg15075069	37	1	27359756									0.304672	0.783977	0.479305
cg02707993	37	1	27412897									0.367367	0.802121	0.434754
cg11673687	37	1	27426555	SLC9A1	NM_003047	3'UTR					TRUE	0.239126	0.608437	0.369311
cg25175271	37	1	27437169	SLC9A1;SLC9A1	NR_046474;NM_003047	Body;Body						0.523372	0.805732	0.28236
cg01992712	37	1	27441146	SLC9A1;SLC9A1	NR_046474;NM_003047	Body;Body						0.453571	0.930827	0.477256
cg23537353	37	1	27442542	SLC9A1;SLC9A1	NR_046474;NM_003047	Body;Body						0.508628	0.882845	0.374217
cg03630851	37	1	27444413	SLC9A1;SLC9A1	NR_046474;NM_003047	Body;Body						0.241529	0.497297	0.255768
cg26173171	37	1	27459366	SLC9A1;SLC9A1	NR_046474;NM_003047	Body;Body						0.523068	0.836531	0.313464
cg11487759	37	1	27468292	SLC9A1;SLC9A1	NR_046474;NM_003047	Body;Body						0.449038	0.888909	0.43987
cg26313337	37	1	27468772	SLC9A1	NM_003047	Body					TRUE	0.349731	0.688633	0.338903
cg12449168	37	1	27470985	SLC9A1;SLC9A1	NR_046474;NM_003047	Body;Body						0.325959	0.810208	0.484248
cg05778820	37	1	27471782	SLC9A1	NM_003047	Body					TRUE	0.361826	0.739258	0.377432
cg16968174	37	1	27472473	SLC9A1;SLC9A1	NR_046474;NM_003047	Body;Body						0.30322	0.609773	0.306553
cg11128910	37	1	27482379	SLC9A1;SLC9A1	NM_003047;NR_046474	TSS1500;TSS1500	chr1:27481345-27481742	S_Shore				0.423414	0.710628	0.287214
cg03875991	37	1	27599109	WDTC1;WDTC1	NM_015023;NM_001276252	Body;Body						0.518246	0.912478	0.394233
cg00310404	37	1	27673775	SYTL1	NM_032872	Body	chr1:27675919-27678016	N_Shelf			TRUE	0.471658	0.776532	0.304875
cg00851518	37	1	27676652	SYTL1	NM_032872	Body	chr1:27675919-27678016	Island			TRUE	0.246112	0.500825	0.254713
cg00759254	37	1	27679961	SYTL1	NM_032872	Body	chr1:27675919-27678016	S_Shore			TRUE	0.468258	0.742996	0.274738
cg11592082	37	1	27683345	MAP3K6	NM_004672	Body	chr1:27683277-27683590	Island			TRUE	0.451414	0.703557	0.252143
cg07380735	37	1	27684494	MAP3K6;MAP3K6	NM_004672;NM_001297609	Body;Body	chr1:27683277-27683590	S_Shore				0.405473	0.664185	0.258712
cg26161024	37	1	27693840	MAP3K6	NM_004672	TSS1500	chr1:27692412-27693243	S_Shore			TRUE	0.221025	0.487364	0.266338
cg11529819	37	1	27695677	FCN3;FCN3	NM_173452;NM_003665	3'UTR;3'UTR	chr1:27692412-27693243	S_Shelf			TRUE	0.299302	0.551164	0.251862
cg06607997	37	1	27699132	FCN3;FCN3	NM_173452;NM_003665	Body;Body						0.46603	0.864517	0.398486
cg13985436	37	1	27705902	CD164L2	NM_207397	3'UTR	chr1:27709600-27709831	N_Shelf			TRUE	0.565728	0.869172	0.303443
cg15166089	37	1	27710030	CD164L2	NM_207397	TSS1500	chr1:27709600-27709831	S_Shore			TRUE	0.489608	0.764407	0.274799
cg10410832	37	1	27808895	WASF2;WASF2	NM_001201404;NM_006990	5'UTR;5'UTR						0.566007	0.847681	0.281675
cg22226904	37	1	27819060				chr1:27816342-27816853	S_Shelf			TRUE	0.159253	0.43748	0.278228
cg16371039	37	1	27834987									0.392524	0.796858	0.404335
cg14551860	37	1	27844043									0.203314	0.499223	0.295909
cg06137502	37	1	27845980									0.351445	0.720049	0.368605
cg11365124	37	1	27846026									0.522252	0.848964	0.326712
cg13680928	37	1	27856337				chr1:27854416-27854963	S_Shore				0.463847	0.800402	0.336555
cg16604035	37	1	27863299	AHDC1	NM_001029882	3'UTR					TRUE	0.180017	0.580916	0.400899
cg25153852	37	1	27867322	AHDC1	NM_001029882	3'UTR						0.326257	0.816666	0.490409
cg27508623	37	1	27868615	AHDC1	NM_001029882	3'UTR						0.537558	0.799635	0.262077
cg24541864	37	1	27869474	AHDC1	NM_001029882	3'UTR				chr1:27869425-27869425		0.240194	0.505308	0.265113
cg13920090	37	1	27872303	AHDC1	NM_001029882	3'UTR	chr1:27874417-27874638	N_Shelf			TRUE	0.159706	0.484221	0.324515
cg26161057	37	1	27881600	AHDC1	NM_001029882	5'UTR					TRUE	0.379342	0.629768	0.250426
cg24534743	37	1	27884345	AHDC1	NM_001029882	5'UTR					TRUE	0.273251	0.523358	0.250108
cg11929702	37	1	27884618	AHDC1	NM_001029882	5'UTR						0.216419	0.490322	0.273903
cg20594135	37	1	27886402	AHDC1	NM_001029882	5'UTR						0.385991	0.647116	0.261125
cg00594099	37	1	27893886	AHDC1	NM_001029882	5'UTR	chr1:27894927-27895524	N_Shore			TRUE	0.270289	0.688448	0.418159
cg17110920	37	1	27893925	AHDC1	NM_001029882	5'UTR	chr1:27894927-27895524	N_Shore			TRUE	0.245496	0.59728	0.351784
cg13375463	37	1	27899025	AHDC1	NM_001029882	5'UTR	chr1:27901660-27902688	N_Shelf			TRUE	0.397258	0.684379	0.287121
cg13373315	37	1	27899699	AHDC1	NM_001029882	5'UTR	chr1:27901660-27902688	N_Shore			TRUE	0.393885	0.815049	0.421164
cg10364249	37	1	27901698	AHDC1	NM_001029882	5'UTR	chr1:27901660-27902688	Island			TRUE	0.168153	0.428656	0.260504
cg27424995	37	1	27902555	AHDC1	NM_001029882	5'UTR	chr1:27901660-27902688	Island			TRUE	0.123066	0.393219	0.270152
cg02496392	37	1	27916318	AHDC1	NM_001029882	5'UTR				chr1:27916292-27916292		0.414868	0.790463	0.375596
cg13683975	37	1	27943724	FGR;FGR;FGR	NM_001042729;NM_001042747;NM_005248	Body;Body;Body	chr1:27941865-27942324	S_Shore			TRUE	0.4371	0.701982	0.264883
cg01519733	37	1	27974438								TRUE	0.35101	0.642644	0.291634
cg00407926	37	1	27982013									0.293382	0.620428	0.327046
cg22433862	37	1	28013341								TRUE	0.486318	0.780488	0.29417
cg01988575	37	1	28159285	PPP1R8;PPP1R8;PPP1R8;PPP1R8;PPP1R8;PPP1R8	NM_014110;NM_002713;NM_138558;NM_138558;NM_002713;NM_014110	ExonBnd;ExonBnd;ExonBnd;5'UTR;5'UTR;Body	chr1:28157221-28157788	S_Shore				0.351715	0.670465	0.31875
cg10040091	37	1	28191154							chr1:28190756-28190756		0.377112	0.630867	0.253755
cg25670447	37	1	28191267									0.492323	0.891262	0.398939
cg13715975	37	1	28206532	THEMIS2;THEMIS2;THEMIS2;THEMIS2;THEMIS2	NM_004848;NM_001039477;NM_001105556;NM_001286115;NM_001286113	Body;Body;Body;Body;Body						0.637743	0.891387	0.253644
cg20961280	37	1	28384710	EYA3;EYA3;EYA3;EYA3;EYA3	NR_104214;NM_001282562;NM_001282561;NM_001282560;NM_001990	Body;5'UTR;5'UTR;5'UTR;5'UTR						0.492795	0.897159	0.404364
cg22500255	37	1	28384743	EYA3;EYA3;EYA3;EYA3;EYA3	NR_104214;NM_001282562;NM_001282561;NM_001282560;NM_001990	Body;5'UTR;5'UTR;5'UTR;5'UTR						0.300433	0.631384	0.330952
cg13400109	37	1	28384890	EYA3;EYA3;EYA3;EYA3;EYA3	NR_104214;NM_001282562;NM_001282561;NM_001282560;NM_001990	Body;5'UTR;5'UTR;5'UTR;5'UTR						0.250556	0.653768	0.403212
cg13210571	37	1	28385279	EYA3;EYA3;EYA3;EYA3;EYA3	NR_104214;NM_001282562;NM_001282561;NM_001282560;NM_001990	Body;5'UTR;5'UTR;5'UTR;5'UTR						0.537554	0.878321	0.340767
cg15660458	37	1	28394258	EYA3;EYA3;EYA3;EYA3;EYA3	NR_104214;NM_001282562;NM_001282561;NM_001282560;NM_001990	Body;5'UTR;5'UTR;5'UTR;5'UTR						0.344731	0.604412	0.259681
cg09204609	37	1	28410567	EYA3;EYA3;EYA3;EYA3;EYA3	NR_104214;NM_001282562;NM_001282561;NM_001282560;NM_001990	Body;5'UTR;5'UTR;5'UTR;5'UTR						0.382821	0.660135	0.277315
cg07844563	37	1	28423139	LOC653566	NR_027268	TSS200					TRUE	0.476665	0.860585	0.38392
cg20486986	37	1	28431648								TRUE	0.395619	0.651992	0.256373
cg12154164	37	1	28484534	PTAFR;PTAFR;PTAFR;PTAFR	NM_001164723;NM_000952;NM_001164722;NM_001164721	5'UTR;5'UTR;5'UTR;5'UTR						0.366148	0.779762	0.413614
cg17633724	37	1	28520347	PTAFR;PTAFR;PTAFR;PTAFR	NM_001164722;NM_001164721;NM_001164722;NM_001164721	1stExon;1stExon;5'UTR;5'UTR						0.411434	0.741561	0.330127
cg08577553	37	1	28520392	PTAFR;PTAFR;PTAFR;PTAFR	NM_001164722;NM_001164721;NM_001164722;NM_001164721	1stExon;1stExon;5'UTR;5'UTR						0.321659	0.579677	0.258018
cg13248890	37	1	28520530	PTAFR;PTAFR	NM_001164722;NM_001164721	TSS200;TSS200						0.463729	0.792158	0.32843
cg17320269	37	1	28520553	PTAFR;PTAFR	NM_001164722;NM_001164721	TSS200;TSS200						0.221393	0.519316	0.297923
cg19371286	37	1	28520866	PTAFR;PTAFR	NM_001164721;NM_001164722	TSS1500;TSS1500					TRUE	0.558416	0.816252	0.257836
cg03214185	37	1	28568498									0.34103	0.882645	0.541616
cg11844530	37	1	28576552				chr1:28573701-28574022	S_Shelf			TRUE	0.401215	0.656039	0.254823
cg00955039	37	1	28582128				chr1:28585831-28587249	N_Shelf			TRUE	0.354116	0.651582	0.297467
cg21262579	37	1	28653606				chr1:28655365-28655667	N_Shore				0.505226	0.783318	0.278092
cg23847017	37	1	28764854	PHACTR4;PHACTR4;PHACTR4	NM_023923;NM_023923;NM_001048183	1stExon;5'UTR;Body					TRUE	0.0872329	0.348116	0.260883
cg11310044	37	1	28806952	PHACTR4;PHACTR4;PHACTR4;PHACTR4	NM_001048183;NM_023923;NM_001048183;NM_023923	ExonBnd;ExonBnd;Body;Body						0.599982	0.921259	0.321277
cg25105990	37	1	28921512				chr1:28919041-28919454	S_Shelf			TRUE	0.379529	0.72715	0.347621
cg08914946	37	1	28925778									0.435907	0.783253	0.347346
cg13430534	37	1	28994700	GMEB1;GMEB1	NM_024482;NM_006582	TSS1500;TSS1500						0.254517	0.613486	0.358969
cg04725524	37	1	29002297	GMEB1;GMEB1	NM_024482;NM_006582	5'UTR;5'UTR						0.325608	0.654151	0.328543
cg08896512	37	1	29074913	YTHDF2;YTHDF2;YTHDF2	NM_001173128;NM_016258;NM_001172828	Body;Body;Body						0.248847	0.540656	0.291809
cg11226105	37	1	29102519				chr1:29101790-29102069	S_Shore				0.3227	0.748545	0.425845
cg11877273	37	1	29182535	OPRD1	NM_000911	Body						0.343422	0.738639	0.395217
cg07086181	37	1	29208932									0.395086	0.727078	0.331992
cg27527371	37	1	29214792	EPB41;EPB41;EPB41;EPB41;EPB41	NM_203343;NM_001166005;NM_001166007;NM_004437;NM_203342	5'UTR;5'UTR;5'UTR;5'UTR;5'UTR	chr1:29213438-29214300	S_Shore		chr1:29214759-29214759		0.075585	0.33632	0.260735
cg08118535	37	1	29463306				chr1:29460810-29461172	S_Shelf				0.26389	0.632828	0.368937
cg14775852	37	1	29543215	MECR;MECR;MECR	NM_016011;NM_016011;NM_001024732	ExonBnd;Body;5'UTR						0.470052	0.825253	0.3552
cg02972093	37	1	29580671	PTPRU;PTPRU;PTPRU;PTPRU	NM_133178;NM_001195001;NM_005704;NM_133177	Body;Body;Body;Body						0.548976	0.925931	0.376955
cg14754741	37	1	29580683	PTPRU;PTPRU;PTPRU;PTPRU	NM_133178;NM_001195001;NM_005704;NM_133177	Body;Body;Body;Body						0.423038	0.788092	0.365054
cg18881017	37	1	29797614									0.322919	0.589416	0.266497
cg26786648	37	1	29877209									0.348137	0.7495	0.401364
cg09639643	37	1	30112291									0.311936	0.572974	0.261038
cg03354203	37	1	30128888									0.439427	0.813957	0.37453
cg18352985	37	1	30150219									0.169947	0.43708	0.267133
cg20284696	37	1	30182918									0.315283	0.570126	0.254844
cg11564013	37	1	30418984									0.273099	0.526476	0.253377
cg14543495	37	1	30553965									0.300853	0.567218	0.266365
cg02101451	37	1	30562126									0.220484	0.623297	0.402813
cg01975492	37	1	30582972									0.203427	0.489759	0.286333
cg19981156	37	1	31130734									0.398255	0.698717	0.300462
cg13997667	37	1	31140913									0.461101	0.869703	0.408603
cg00760904	37	1	31164849									0.400635	0.744926	0.344291
cg19941336	37	1	31296597									0.479534	0.743684	0.26415
cg07689731	37	1	31393915								TRUE	0.347373	0.637916	0.290543
cg10297267	37	1	31441150	SNORD85;PUM1;PUM1	NR_003066;NM_001020658;NM_014676	TSS200;Body;Body						0.264175	0.529321	0.265146
cg22111442	37	1	31441196	SNORD85;PUM1;PUM1	NR_003066;NM_014676;NM_001020658	TSS200;Body;Body					TRUE	0.47854	0.880403	0.401863
cg05675611	37	1	31441274	SNORD85;PUM1;PUM1	NR_003066;NM_001020658;NM_014676	TSS200;Body;Body						0.426683	0.764335	0.337652
cg10433918	37	1	31478730	PUM1;PUM1	NM_014676;NM_001020658	Body;Body			low-CpG:31251315-31251363		TRUE	0.553489	0.888655	0.335166
cg04976330	37	1	31480640	PUM1;PUM1	NM_014676;NM_001020658	Body;Body					TRUE	0.258165	0.57112	0.312955
cg19377326	37	1	31486063	PUM1;PUM1	NM_014676;NM_001020658	Body;Body					TRUE	0.493019	0.883096	0.390078
cg07891248	37	1	31498267	PUM1;PUM1	NM_001020658;NM_014676	Body;Body						0.391744	0.675125	0.283382
cg08536019	37	1	31520606	PUM1;PUM1	NM_001020658;NM_014676	Body;Body						0.402078	0.660571	0.258493
cg12006201	37	1	31595223									0.376229	0.765575	0.389346
cg11902653	37	1	31694152	NKAIN1	NM_024522	Body						0.344304	0.617895	0.273591
cg05764470	37	1	31863398									0.448482	0.776358	0.327876
cg25342674	37	1	31881983	SERINC2;SERINC2	NM_001199038;NM_001199037	TSS1500;TSS1500	chr1:31885794-31887010	N_Shelf				0.346422	0.749708	0.403286
cg12168389	37	1	31881988	SERINC2;SERINC2	NM_001199038;NM_001199037	TSS1500;TSS1500	chr1:31885794-31887010	N_Shelf				0.325686	0.67311	0.347424
cg03662532	37	1	31882150	SERINC2;SERINC2	NM_001199038;NM_001199037	TSS1500;TSS1500	chr1:31885794-31887010	N_Shelf				0.545334	0.886805	0.341471
cg00997713	37	1	31882244	SERINC2;SERINC2	NM_001199037;NM_001199038	TSS1500;TSS200	chr1:31885794-31887010	N_Shelf				0.42851	0.774496	0.345987
cg00525833	37	1	31983220	LOC284551	NR_027085	TSS1500					TRUE	0.491301	0.866889	0.375588
cg04247069	37	1	32038437									0.440481	0.878503	0.438022
cg06277957	37	1	32040692	TINAGL1;TINAGL1	NM_001204414;NM_022164	TSS1500;TSS1500						0.298712	0.627156	0.328445
cg18012057	37	1	32041287	TINAGL1;TINAGL1	NM_001204414;NM_022164	TSS1500;TSS1500						0.238142	0.508389	0.270247
cg25811375	37	1	32041315	TINAGL1;TINAGL1	NM_001204414;NM_022164	TSS1500;TSS1500						0.386628	0.675401	0.288773
cg01202491	37	1	32041327	TINAGL1;TINAGL1	NM_001204414;NM_022164	TSS1500;TSS1500						0.41938	0.720312	0.300932
cg03314569	37	1	32041732	TINAGL1	NM_022164	TSS1500					TRUE	0.353746	0.609751	0.256006
cg12905085	37	1	32054510				chr1:32054341-32054843	Island			TRUE	0.192225	0.445751	0.253526
cg11047144	37	1	32093814									0.267242	0.628616	0.361374
cg24814328	37	1	32104077	PEF1;PEF1;PEF1	NR_033688;NR_033686;NM_012392	Body;Body;Body						0.223487	0.612525	0.389038
cg06209197	37	1	32106926	PEF1	NM_012392	Body	chr1:32110210-32110961	N_Shelf			TRUE	0.454304	0.764391	0.310087
cg11989689	37	1	32117160									0.345756	0.705037	0.359282
cg24078870	37	1	32121604	COL16A1	NM_001856	Body						0.601122	0.851618	0.250496
cg08492921	37	1	32132004	COL16A1	NM_001856	Body						0.319255	0.804865	0.485609
cg22127075	37	1	32135179	COL16A1	NM_001856	Body						0.395688	0.688965	0.293277
cg13411999	37	1	32166930	COL16A1	NM_001856	Body	chr1:32169537-32169869	N_Shelf		chr1:32166698-32166698		0.16676	0.461746	0.294987
cg04689698	37	1	32167458	COL16A1	NM_001856	Body	chr1:32169537-32169869	N_Shelf				0.173448	0.479102	0.305654
cg00160583	37	1	32167512	COL16A1	NM_001856	Body	chr1:32169537-32169869	N_Shelf			TRUE	0.216592	0.467822	0.25123
cg16164167	37	1	32168609	COL16A1	NM_001856	5'UTR	chr1:32169537-32169869	N_Shore				0.293784	0.6034	0.309616
cg00566320	37	1	32172204				chr1:32169537-32169869	S_Shelf			TRUE	0.22809	0.491678	0.263589
cg16386264	37	1	32178267				chr1:32180131-32180487	N_Shore				0.11179	0.37909	0.2673
cg07927219	37	1	32183342				chr1:32180131-32180487	S_Shelf			TRUE	0.453281	0.823213	0.369933
cg18727072	37	1	32202215	ADGRB2;ADGRB2	NM_001294336;NM_001294335	Body;Body						0.439148	0.808573	0.369425
cg07201235	37	1	32279896	SPOCD1;SPOCD1;SPOCD1	NM_144569;NM_001281987;NM_001281988	Body;Body;5'UTR						0.436935	0.890716	0.453782
cg16965769	37	1	32308358									0.675153	0.927377	0.252225
cg19815753	37	1	32363502									0.265805	0.60009	0.334284
cg07577228	37	1	32443160									0.210046	0.601655	0.391609
cg15210307	37	1	32498089	KHDRBS1	NM_006559	Body					TRUE	0.450511	0.733138	0.282627
cg06586676	37	1	32536516				chr1:32538205-32539052	N_Shore				0.629154	0.900493	0.271339
cg05690539	37	1	32536528				chr1:32538205-32539052	N_Shore				0.473851	0.796528	0.322677
cg00958944	37	1	32577363	KPNA6	NM_012316	Body	chr1:32574061-32574318	S_Shelf			TRUE	0.330138	0.719934	0.389796
cg22499874	37	1	32644644	TXLNA	NM_175852	TSS1500	chr1:32645154-32645814	N_Shore			TRUE	0.563218	0.912531	0.349313
cg23885562	37	1	32670486	IQCC;CCDC28B;IQCC	NM_001160042;NM_024296;NM_018134	TSS1500;Body;TSS1500	chr1:32670569-32671885	N_Shore			TRUE	0.518869	0.897272	0.378403
cg19721787	37	1	32670695	IQCC;CCDC28B;IQCC	NM_001160042;NM_024296;NM_018134	TSS1500;Body;TSS1500	chr1:32670569-32671885	Island			TRUE	0.143945	0.409845	0.265899
cg11960677	37	1	32705760	MTMR9L	NR_026850	Body	chr1:32705524-32707141	Island			TRUE	0.290448	0.620994	0.330545
cg27513308	37	1	32797653	HDAC1	NM_004964	Body	chr1:32800859-32802229	N_Shelf			TRUE	0.586423	0.849267	0.262844
cg16379513	37	1	32827150	LOC100128071;TSSK3	NM_001167676;NM_052841	Body;TSS1500	chr1:32826944-32828017	Island			TRUE	0.395448	0.718814	0.323367
cg03361173	37	1	32829467	TSSK3	NM_052841	Body	chr1:32826944-32828017	S_Shore				0.573384	0.911109	0.337725
cg01145914	37	1	32893114				chr1:32892428-32892835	S_Shore				0.364284	0.734885	0.370602
cg06846752	37	1	32929715	ZBTB8B	NM_001145720	TSS1500	chr1:32930500-32931061	N_Shore			TRUE	0.211686	0.534654	0.322968
cg24438085	37	1	32963090				chr1:32966118-32966563	N_Shelf			TRUE	0.397212	0.659194	0.261982
cg10761479	37	1	33203135							chr1:33203093-33203093		0.330408	0.715943	0.385535
cg16728604	37	1	33206504	KIAA1522	NM_020888	TSS1500	chr1:33207636-33207874	N_Shore			TRUE	0.363342	0.625719	0.262377
cg02458483	37	1	33206805	KIAA1522	NM_020888	TSS1500	chr1:33207636-33207874	N_Shore			TRUE	0.394225	0.702357	0.308132
cg20611334	37	1	33209453	KIAA1522	NM_020888	Body	chr1:33207636-33207874	S_Shore			TRUE	0.215234	0.490605	0.275371
cg25850629	37	1	33210830	KIAA1522	NM_020888	Body	chr1:33207636-33207874	S_Shelf			TRUE	0.341688	0.721252	0.379564
cg06746774	37	1	33216950	KIAA1522	NM_020888	Body	chr1:33219427-33220028	N_Shelf			TRUE	0.368157	0.820787	0.45263
cg17246910	37	1	33219158	KIAA1522	NM_020888	Body	chr1:33219427-33220028	N_Shore				0.262135	0.523018	0.260883
cg03092343	37	1	33221514	KIAA1522	NM_020888	Body	chr1:33219427-33220028	S_Shore		chr1:33221272-33221272		0.332798	0.70299	0.370192
cg13254240	37	1	33225975	KIAA1522	NM_020888	Body				chr1:33225777-33225777		0.276278	0.783656	0.507378
cg17031396	37	1	33226541	KIAA1522	NM_020888	Body						0.411886	0.777102	0.365216
cg22048405	37	1	33226596	KIAA1522	NM_020888	Body				chr1:33226574-33226574	TRUE	0.292813	0.787952	0.495139
cg03125875	37	1	33227555	KIAA1522	NM_020888	Body						0.304282	0.63341	0.329128
cg04892182	37	1	33231382	KIAA1522	NM_020888	Body					TRUE	0.485908	0.824671	0.338763
cg13629162	37	1	33234487	KIAA1522	NM_020888	Body	chr1:33235494-33235718	N_Shore			TRUE	0.630003	0.881162	0.251159
cg01704608	37	1	33246431	YARS	NM_003680	Body						0.533365	0.795655	0.26229
cg06431842	37	1	33343804									0.469508	0.809833	0.340326
cg15125626	37	1	33347228								TRUE	0.496164	0.786051	0.289887
cg00912746	37	1	33350709	HPCA	NM_002143	TSS1500	chr1:33351686-33352397	N_Shore			TRUE	0.303369	0.612669	0.3093
cg20340029	37	1	33415223	RNF19B;RNF19B;RNF19B	NM_001300826;NM_153341;NM_001127361	Body;Body;Body						0.579414	0.911847	0.332433
cg00843917	37	1	33415247	RNF19B;RNF19B;RNF19B	NM_001300826;NM_153341;NM_001127361	Body;Body;Body						0.508702	0.870232	0.36153
cg04223417	37	1	33419944	RNF19B;RNF19B;RNF19B	NM_001300826;NM_153341;NM_001127361	Body;Body;Body						0.50434	0.832563	0.328224
cg26406441	37	1	33427141	RNF19B;RNF19B	NM_153341;NM_001127361	Body;Body	chr1:33429531-33430513	N_Shelf			TRUE	0.481386	0.858628	0.377242
cg05823909	37	1	33451805									0.681786	0.949148	0.267362
cg13690407	37	1	33473178								TRUE	0.344921	0.722437	0.377516
cg16680240	37	1	33476710	AK2;AK2;AK2	NR_037591;NM_001199199;NM_013411	Body;Body;Body						0.186288	0.449831	0.263543
cg05484544	37	1	33479529	AK2;AK2;AK2;AK2;AK2	NR_037591;NM_001199199;NM_013411;NR_037592;NM_001625	Body;Body;Body;Body;Body						0.404934	0.840379	0.435445
cg03151893	37	1	33513729				chr1:33516594-33516933	N_Shelf				0.449761	0.704835	0.255074
cg03177171	37	1	33547803	AZIN2;AZIN2;AZIN2;AZIN2;AZIN2;AZIN2;AZIN2;AZIN2;AZIN2	NM_052998;NM_001293562;NM_001301826;NM_001301825;NM_001301826;NM_001301825;NM_001301824;NM_001301823;NR_126031	5'UTR;5'UTR;5'UTR;5'UTR;1stExon;1stExon;5'UTR;5'UTR;Body	chr1:33546524-33547243	S_Shore				0.239352	0.519432	0.28008
cg17023193	37	1	33560594	AZIN2;AZIN2;AZIN2;AZIN2;AZIN2;AZIN2;AZIN2	NM_001301824;NM_001301823;NR_126031;NM_052998;NM_001293562;NM_001301826;NM_001301825	Body;Body;Body;Body;Body;Body;Body						0.459907	0.825408	0.3655
cg10281968	37	1	33633217	TRIM62	NM_018207	Body						0.530681	0.845247	0.314565
cg09618877	37	1	33638218	TRIM62	NM_018207	Body						0.560971	0.885614	0.324643
cg17422022	37	1	33642173	TRIM62	NM_018207	Body						0.361941	0.629895	0.267954
cg03976244	37	1	33642194	TRIM62	NM_018207	Body						0.496416	0.881918	0.385502
cg25274008	37	1	33648648	TRIM62	NM_018207	TSS1500	chr1:33646613-33647878	S_Shore			TRUE	0.478044	0.781916	0.303871
cg20289312	37	1	33685582							chr1:33685276-33685276		0.353027	0.68755	0.334522
cg04311473	37	1	33686435								TRUE	0.461394	0.888779	0.427385
cg03882972	37	1	33687175									0.433472	0.902147	0.468675
cg01407454	37	1	33687646									0.449182	0.877002	0.42782
cg21316981	37	1	33735090	ZNF362	NM_152493	5'UTR						0.363399	0.76066	0.397261
cg16987567	37	1	33790374	PHC2;PHC2	NM_198040;NM_004427	3'UTR;3'UTR					TRUE	0.291184	0.640308	0.349124
cg23202722	37	1	33793808	PHC2;PHC2	NM_004427;NM_198040	Body;Body					TRUE	0.1716	0.430158	0.258558
cg14811472	37	1	33804213	PHC2;PHC2	NM_004427;NM_198040	5'UTR;Body						0.134544	0.418613	0.28407
cg06763161	37	1	33813745	PHC2;PHC2	NM_004427;NM_198040	5'UTR;Body	chr1:33814783-33815770	N_Shore			TRUE	0.234901	0.513684	0.278784
cg24691891	37	1	33829934	PHC2	NM_198040	Body					TRUE	0.286139	0.641126	0.354986
cg06772729	37	1	33835165	PHC2	NM_198040	Body						0.36511	0.683073	0.317963
cg10685138	37	1	33842640	PHC2	NM_198040	TSS1500						0.441541	0.901134	0.459593
cg11828820	37	1	33937646	ZSCAN20	NM_145238	TSS1500	chr1:33938025-33938328	N_Shore			TRUE	0.304437	0.695947	0.39151
cg15207669	37	1	34420920	CSMD2	NM_052896	Body					TRUE	0.386239	0.826911	0.440672
cg04351698	37	1	34462469	CSMD2;CSMD2	NM_001281956;NM_052896	Body;Body				chr1:34462454-34462454		0.453901	0.730546	0.276646
cg01956976	37	1	34642502	C1orf94;C1orf94	NM_001134734;NM_032884	TSS200;5'UTR	chr1:34642382-34643024	Island				0.140786	0.395318	0.254531
cg26108524	37	1	34872970									0.394925	0.738223	0.343298
cg00619807	37	1	35220115	GJB5	NM_005268	TSS1500						0.431189	0.735401	0.304212
cg08612871	37	1	35220334	GJB5	NM_005268	TSS1500					TRUE	0.324055	0.587117	0.263062
cg25732104	37	1	35220710	GJB5	NM_005268	TSS200					TRUE	0.278077	0.557455	0.279378
cg01333788	37	1	35220814	GJB5	NM_005268	5'UTR					TRUE	0.40069	0.686869	0.286179
cg23487967	37	1	35244727				chr1:35246876-35247599	N_Shelf				0.572072	0.8466	0.274528
cg13488851	37	1	35246223	GJB3	NM_024009	TSS1500	chr1:35246876-35247599	N_Shore			TRUE	0.285915	0.685482	0.399567
cg06375539	37	1	35249239	GJB3;GJB3	NM_001005752;NM_024009	5'UTR;5'UTR	chr1:35250418-35250736	N_Shore			TRUE	0.37225	0.668638	0.296388
cg02480666	37	1	35259746	GJA4	NM_002060	5'UTR	chr1:35258564-35258791	S_Shore			TRUE	0.427524	0.739811	0.312288
cg01716680	37	1	35259750	GJA4	NM_002060	5'UTR	chr1:35258564-35258791	S_Shore			TRUE	0.372555	0.642381	0.269825
cg16375909	37	1	35524504	ZMYM1	NM_001289088	TSS1500						0.398058	0.746457	0.348399
cg14832542	37	1	35524585	ZMYM1	NM_001289088	TSS1500						0.509249	0.787137	0.277888
cg11365382	37	1	35524607	ZMYM1	NM_001289088	TSS1500						0.432114	0.751951	0.319837
cg15623791	37	1	35524813	ZMYM1	NM_001289088	TSS1500						0.406052	0.665606	0.259554
cg12853766	37	1	35660486				chr1:35657467-35658811	S_Shore				0.470428	0.805809	0.335381
cg16876488	37	1	35764176	ZMYM4	NM_005095	Body						0.198081	0.477326	0.279245
cg16815882	37	1	35908609	KIAA0319L	NM_024874	Body					TRUE	0.469498	0.733455	0.263957
cg17361569	37	1	35965792	KIAA0319L	NM_024874	Body						0.468042	0.921887	0.453845
cg09874415	37	1	35989973	KIAA0319L	NM_024874	Body					TRUE	0.423256	0.846352	0.423096
cg24559147	37	1	36020018	KIAA0319L	NM_024874	Body	chr1:36022680-36023834	N_Shelf			TRUE	0.207006	0.479122	0.272116
cg13952825	37	1	36020714	KIAA0319L	NM_024874	5'UTR	chr1:36022680-36023834	N_Shore				0.388302	0.684265	0.295963
cg24940583	37	1	36020939	KIAA0319L	NM_024874	5'UTR	chr1:36022680-36023834	N_Shore			TRUE	0.262429	0.578678	0.316248
cg00234370	37	1	36021674	KIAA0319L	NM_024874	5'UTR	chr1:36022680-36023834	N_Shore			TRUE	0.31257	0.643598	0.331028
cg15097913	37	1	36021962	KIAA0319L;NCDN;NCDN;NCDN	NM_024874;NM_001014841;NM_014284;NM_001014839	5'UTR;TSS1500;TSS1500;TSS1500	chr1:36022680-36023834	N_Shore				0.285738	0.641996	0.356258
cg19865916	37	1	36026194	NCDN;NCDN;NCDN	NM_001014841;NM_014284;NM_001014839	Body;Body;Body	chr1:36022680-36023834	S_Shelf			TRUE	0.628563	0.879378	0.250815
cg22402261	37	1	36026611	NCDN;NCDN;NCDN	NM_001014841;NM_014284;NM_001014839	Body;Body;Body	chr1:36022680-36023834	S_Shelf			TRUE	0.346175	0.693339	0.347165
cg03100713	37	1	36029823	NCDN;NCDN;NCDN	NM_001014839;NM_014284;NM_001014841	Body;Body;Body						0.531323	0.866665	0.335342
cg00572482	37	1	36038118	TFAP2E	NM_178548	TSS1500	chr1:36038927-36040051	N_Shore				0.489768	0.869077	0.37931
cg13263950	37	1	36039396	TFAP2E	NM_178548	Body	chr1:36038927-36040051	Island				0.146975	0.421055	0.27408
cg15684423	37	1	36168924									0.395213	0.698831	0.303617
cg02639366	37	1	36275039	EIF2C4	NM_017629	Body	chr1:36273499-36274461	S_Shore			TRUE	0.133103	0.428166	0.295064
cg18878381	37	1	36307108	AGO4	NM_017629	Body						0.549845	0.908017	0.358173
cg13143099	37	1	36307244	AGO4	NM_017629	Body						0.498106	0.857425	0.359318
cg14781700	37	1	36315949	AGO4	NM_017629	Body						0.488112	0.800983	0.312871
cg15127443	37	1	36321064	EIF2C4	NM_017629	3'UTR					TRUE	0.307315	0.626691	0.319376
cg25121831	37	1	36546675				chr1:36549554-36549965	N_Shelf				0.523584	0.801727	0.278142
cg09851679	37	1	36546677				chr1:36549554-36549965	N_Shelf				0.513218	0.764286	0.251067
cg20872472	37	1	36600284								TRUE	0.598308	0.850303	0.251995
cg11974897	37	1	36636835	MAP7D1;MAP7D1;MAP7D1	NM_018067;NM_001286366;NM_001286365	Body;Body;Body						0.337682	0.667726	0.330044
cg11440590	37	1	36637259	MAP7D1;MAP7D1;MAP7D1	NM_018067;NM_001286366;NM_001286365	Body;Body;Body						0.480863	0.900418	0.419554
cg00169111	37	1	36639894	MAP7D1	NM_018067	Body	chr1:36641756-36642461	N_Shore			TRUE	0.539799	0.79302	0.253221
cg19002149	37	1	36644059	MAP7D1	NM_018067	Body	chr1:36643955-36644327	Island			TRUE	0.277474	0.595497	0.318022
cg13962153	37	1	36644157	MAP7D1	NM_018067	Body	chr1:36643955-36644327	Island			TRUE	0.555176	0.835585	0.280409
cg08458912	37	1	36644235	MAP7D1	NM_018067	Body	chr1:36643955-36644327	Island			TRUE	0.431874	0.695359	0.263486
cg04574716	37	1	36644446	MAP7D1;MAP7D1;MAP7D1	NM_018067;NM_001286366;NM_001286365	Body;Body;Body	chr1:36643955-36644327	S_Shore				0.358853	0.698608	0.339756
cg18233931	37	1	36670099								TRUE	0.224604	0.625213	0.400609
cg20416345	37	1	36735198	THRAP3	NM_005119	5'UTR						0.230945	0.490719	0.259774
cg10622536	37	1	36771021	C1orf113	NM_001162530	TSS1500	chr1:36771830-36773009	N_Shore			TRUE	0.521178	0.860134	0.338956
cg17131183	37	1	36771362	C1orf113;C1orf113	NM_024676;NM_001162530	TSS1500;TSS1500	chr1:36771830-36773009	N_Shore			TRUE	0.564457	0.899266	0.334809
cg20381560	37	1	36771493	SH3D21;SH3D21	NM_001162530;NM_024676	TSS1500;TSS1500	chr1:36771830-36773009	N_Shore				0.460077	0.877977	0.4179
cg02865595	37	1	36771714	C1orf113;C1orf113	NM_024676;NM_001162530	TSS1500;TSS1500	chr1:36771830-36773009	N_Shore			TRUE	0.192451	0.543219	0.350767
cg21418854	37	1	36771781	C1orf113;C1orf113	NM_024676;NM_001162530	TSS1500;TSS1500	chr1:36771830-36773009	N_Shore			TRUE	0.356308	0.712034	0.355726
cg19373545	37	1	36771793	C1orf113;C1orf113	NM_024676;NM_001162530	TSS1500;TSS200	chr1:36771830-36773009	N_Shore			TRUE	0.416466	0.787992	0.371526
cg06774445	37	1	36793290				chr1:36786500-36789402	S_Shelf			TRUE	0.458916	0.743295	0.284378
cg15467877	37	1	36814475	STK40;STK40;STK40	NM_001282547;NM_001282546;NM_032017	Body;Body;Body						0.543243	0.888299	0.345057
cg02711479	37	1	36849024	STK40	NM_032017	5'UTR	chr1:36851089-36851873	N_Shelf			TRUE	0.38134	0.885911	0.50457
cg16305437	37	1	36902670	OSCP1;OSCP1	NM_145047;NM_206837	Body;Body						0.480404	0.841861	0.361457
cg04430911	37	1	36914349	OSCP1;OSCP1	NM_206837;NM_145047	Body;Body	chr1:36915796-36916324	N_Shore			TRUE	0.419491	0.79423	0.374739
cg11596009	37	1	36916744	OSCP1;OSCP1	NM_145047;NM_206837	TSS1500;TSS1500	chr1:36915796-36916324	S_Shore			TRUE	0.151888	0.440289	0.288401
cg10889133	37	1	36940986	CSF3R;CSF3R;CSF3R;CSF3R;CSF3R;CSF3R	NM_172313;NM_000760;NM_156039;NM_172313;NM_000760;NM_156039	Body;Body;Body;ExonBnd;ExonBnd;ExonBnd						0.382546	0.803836	0.42129
cg02483735	37	1	37051530								TRUE	0.373605	0.694498	0.320894
cg26440479	37	1	37507526									0.594903	0.848852	0.253949
cg01185521	37	1	38070791									0.393487	0.853315	0.459828
cg13919631	37	1	38071571								TRUE	0.382567	0.692267	0.3097
cg11305072	37	1	38086618	RSPO1;RSPO1;RSPO1;RSPO1	NM_001242910;NM_001242908;NM_001038633;NM_001242909	Body;Body;Body;Body						0.505692	0.826602	0.32091
cg11319428	37	1	38092202	RSPO1;RSPO1;RSPO1;RSPO1	NM_001242910;NM_001242908;NM_001038633;NM_001242909	Body;Body;Body;Body						0.549478	0.858471	0.308992
cg13705241	37	1	38206942	EPHA10	NM_001099439	Body						0.306076	0.606576	0.3005
cg08534592	37	1	38207247	EPHA10	NM_001099439	Body						0.558617	0.852236	0.293619
cg23762788	37	1	38283350	MTF1	NM_005955	Body						0.130302	0.383286	0.252985
cg18294987	37	1	38330981	INPP5B;INPP5B	NM_001297434;NM_005540	Body;Body						0.372185	0.744127	0.371942
cg04673462	37	1	38461896				chr1:38461584-38461988	Island			TRUE	0.145665	0.405765	0.2601
cg16716223	37	1	38491344									0.528761	0.831557	0.302796
cg24033742	37	1	38493031								TRUE	0.490751	0.898223	0.407472
cg16781877	37	1	38493551									0.454161	0.89697	0.442808
cg16338283	37	1	38496822									0.587494	0.897539	0.310045
cg26594982	37	1	38503168									0.428163	0.867702	0.439539
cg00083068	37	1	38505198									0.434736	0.72941	0.294674
cg07077978	37	1	38508155				chr1:38510102-38513642	N_Shore			TRUE	0.380797	0.676468	0.295671
cg17791651	37	1	38513489	POU3F1	NM_002699	TSS1500	chr1:38510102-38513642	Island			TRUE	0.214596	0.468625	0.25403
cg03030665	37	1	38514267				chr1:38510102-38513642	S_Shore			TRUE	0.424797	0.84798	0.423182
cg10643750	37	1	38515288				chr1:38510102-38513642	S_Shore				0.445388	0.832178	0.38679
cg07019617	37	1	38516658				chr1:38510102-38513642	S_Shelf				0.536281	0.855905	0.319624
cg04218200	37	1	38516887				chr1:38510102-38513642	S_Shelf				0.54697	0.83559	0.28862
cg24453438	37	1	38517272				chr1:38510102-38513642	S_Shelf			TRUE	0.573649	0.857936	0.284288
cg07580573	37	1	38528751									0.470711	0.725962	0.255252
cg12073847	37	1	38530769									0.623353	0.930967	0.307615
cg22051624	37	1	38536093									0.513525	0.895208	0.381682
cg14302554	37	1	38537270									0.272569	0.653546	0.380978
cg24443055	37	1	38540066									0.377191	0.801348	0.424156
cg18026235	37	1	38549430								TRUE	0.429706	0.698009	0.268303
cg20916830	37	1	38583489									0.365142	0.87285	0.507708
cg16058483	37	1	38583721									0.374202	0.81702	0.442819
cg22145550	37	1	38589996									0.389802	0.722505	0.332703
cg08962359	37	1	38590191									0.443684	0.735748	0.292064
cg08746817	37	1	38590956									0.476224	0.87249	0.396266
cg08260014	37	1	38591903							chr1:38591881-38591881		0.409356	0.78959	0.380234
cg17434008	37	1	38974111								TRUE	0.233574	0.504496	0.270922
cg15649007	37	1	38979009									0.317977	0.672225	0.354248
cg18270687	37	1	39035982								TRUE	0.232212	0.523061	0.290849
cg00247259	37	1	39117514									0.33436	0.668926	0.334566
cg12602838	37	1	39196971									0.50856	0.792743	0.284183
cg06197836	37	1	39283522				chr1:39283609-39284576	N_Shore			TRUE	0.335462	0.598463	0.263001
cg10702770	37	1	39283780				chr1:39283609-39284576	Island			TRUE	0.174433	0.469918	0.295484
cg03731661	37	1	39337506	MYCBP	NM_012333	Body	chr1:39338479-39339349	N_Shore			TRUE	0.565527	0.832102	0.266575
cg02270686	37	1	39416868									0.434712	0.74973	0.315018
cg17357247	37	1	39470406	AKIRIN1;AKIRIN1	NM_024595;NM_001136275	3'UTR;3'UTR						0.531917	0.915233	0.383316
cg16314441	37	1	39470631	AKIRIN1;AKIRIN1	NM_001136275;NM_024595	3'UTR;3'UTR					TRUE	0.5161	0.777488	0.261389
cg00723847	37	1	39579108	MACF1	NM_012090	Body						0.270049	0.637497	0.367448
cg01433381	37	1	39592860	MACF1	NM_012090	Body						0.621186	0.892538	0.271353
cg11807227	37	1	39595053	MACF1	NM_012090	Body						0.384043	0.8649	0.480858
cg20591012	37	1	39619990	MACF1	NM_012090	Body						0.486798	0.751451	0.264652
cg07824737	37	1	39620566	MACF1	NM_012090	Body						0.271802	0.535787	0.263984
cg24370375	37	1	39624920	MACF1	NM_012090	Body					TRUE	0.405021	0.813251	0.40823
cg25212177	37	1	39653199	MACF1	NM_012090	Body						0.422661	0.735877	0.313217
cg05800561	37	1	39680296	MACF1	NM_012090	Body					TRUE	0.345733	0.698404	0.352671
cg18647268	37	1	39735142	MACF1	NM_012090	Body					TRUE	0.347648	0.629405	0.281757
cg13347741	37	1	39741694	MACF1	NM_012090	Body						0.342567	0.625346	0.282779
cg10732406	37	1	39844949	MACF1	NM_012090	Body						0.430336	0.795799	0.365463
cg14713026	37	1	39870846	MACF1;MACF1	NM_012090;NM_033044	Body;Body	chr1:39874018-39875239	N_Shelf			TRUE	0.454251	0.765309	0.311058
cg07492830	37	1	39870878	MACF1	NM_012090	Body	chr1:39874018-39875239	N_Shelf				0.38034	0.848061	0.467721
cg23313700	37	1	39966617	BMP8A	NM_181809	Body						0.433473	0.794649	0.361175
cg06452533	37	1	40030187	PABPC4;PABPC4;PABPC4;LOC101929516	NM_001135654;NM_001135653;NM_003819;NR_125979	Body;Body;Body;TSS1500						0.523878	0.867497	0.343619
cg12130560	37	1	40099010	HEYL	NM_014571	Body						0.302681	0.624013	0.321333
cg11242602	37	1	40099015	HEYL	NM_014571	Body						0.172003	0.508697	0.336694
cg20966426	37	1	40167317								TRUE	0.373427	0.727452	0.354025
cg00546153	37	1	40205266	PPIE;PPIE;PPIE	NM_203457;NM_006112;NM_203456	5'UTR;Body;Body	chr1:40204312-40204739	S_Shore			TRUE	0.431728	0.688468	0.25674
cg01703976	37	1	40284404									0.395604	0.874032	0.478428
cg07921828	37	1	40285318									0.424181	0.729336	0.305155
cg04763018	37	1	40292568									0.448336	0.814557	0.366221
cg22016731	37	1	40311142	TRIT1	NM_017646	Body					TRUE	0.39864	0.720494	0.321853
cg06498255	37	1	40318469	TRIT1	NM_017646	Body						0.407399	0.878543	0.471144
cg22691587	37	1	40349894	TRIT1	NM_017646	TSS1500	chr1:40348941-40349288	S_Shore			TRUE	0.42607	0.810611	0.384541
cg02965157	37	1	40350001	TRIT1	NM_017646	TSS1500	chr1:40348941-40349288	S_Shore			TRUE	0.449913	0.743727	0.293814
cg10802429	37	1	40360909									0.231519	0.487487	0.255968
cg12473706	37	1	40392292									0.376357	0.704542	0.328185
cg15244958	37	1	40415779									0.374724	0.631609	0.256885
cg01869896	37	1	40420299	MFSD2A;MFSD2A	NM_032793;NM_001136493	TSS1500;TSS1500	chr1:40420487-40421366	N_Shore			TRUE	0.275985	0.575639	0.299654
cg04922955	37	1	40423553	MFSD2A;MFSD2A;MFSD2A;MFSD2A;MFSD2A	NM_001287808;NR_109896;NM_001136493;NM_001287809;NM_032793	5'UTR;Body;Body;Body;Body	chr1:40420487-40421366	S_Shelf				0.38802	0.889763	0.501743
cg20268381	37	1	40425741	MFSD2A;MFSD2A;MFSD2A;MFSD2A;MFSD2A	NM_001287808;NR_109896;NM_001136493;NM_001287809;NM_032793	5'UTR;Body;Body;Body;Body						0.421467	0.862229	0.440762
cg03913935	37	1	40435180	MFSD2A;MFSD2A;MFSD2A;MFSD2A;MFSD2A	NR_109896;NM_001136493;NM_001287809;NM_032793;NM_001287808	Body;Body;Body;Body;Body						0.447868	0.707677	0.259809
cg15616998	37	1	40435396	MFSD2A;MFSD2A	NM_001136493;NM_032793	3'UTR;3'UTR					TRUE	0.393437	0.827006	0.433569
cg12928102	37	1	40446319									0.280533	0.665992	0.38546
cg24187019	37	1	40496648									0.310429	0.683045	0.372616
cg25905348	37	1	40733757	ZMPSTE24	NM_005857	Body						0.291247	0.586294	0.295047
cg10210510	37	1	40771135	COL9A2	NM_001852	Body	chr1:40769186-40769871	S_Shore			TRUE	0.493642	0.832735	0.339093
cg24312460	37	1	40858062	SMAP2;SMAP2;SMAP2	NM_001198979;NM_022733;NM_001198978	TSS1500;Body;Body						0.178812	0.469344	0.290532
cg22449337	37	1	40943913	ZNF642	NM_198494	5'UTR	chr1:40942784-40943387	S_Shore			TRUE	0.241668	0.625059	0.383391
cg10685614	37	1	41057655									0.330965	0.673591	0.342626
cg14930294	37	1	41078531									0.443588	0.846544	0.402956
cg21615531	37	1	41117009	RIMS3	NM_014747	5'UTR	chr1:41119852-41120136	N_Shelf		chr1:41116840-41116840		0.60064	0.936871	0.336231
cg00408517	37	1	41117248	RIMS3	NM_014747	5'UTR	chr1:41119852-41120136	N_Shelf				0.191384	0.492703	0.30132
cg13247117	37	1	41118770	RIMS3	NM_014747	5'UTR	chr1:41119852-41120136	N_Shore			TRUE	0.291247	0.674601	0.383354
cg26291601	37	1	41170927	NFYC;NFYC;NFYC;NFYC;NFYC	NM_001142588;NM_001142587;NM_014223;NM_001142589;NM_001142590	5'UTR;5'UTR;5'UTR;5'UTR;5'UTR						0.418824	0.827376	0.408552
cg20927728	37	1	41202218	NFYC;NFYC;NFYC;NFYC;NFYC;NFYC	NM_001142588;NM_001142587;NM_014223;NM_001142589;NM_001142590;NM_001308115	5'UTR;5'UTR;5'UTR;5'UTR;5'UTR;5'UTR						0.411954	0.713284	0.301331
cg25547999	37	1	41217619	NFYC;NFYC;NFYC;NFYC;NFYC;NFYC;NFYC	NM_001308115;NM_001142588;NM_001142587;NM_014223;NM_001142589;NM_001142590;NM_001308114	Body;Body;Body;Body;Body;Body;Body						0.487398	0.85042	0.363022
cg17055671	37	1	41234272	NFYC;NFYC;NFYC;NFYC;NFYC;NFYC;NFYC	NM_001308115;NM_001142588;NM_001142587;NM_014223;NM_001142589;NM_001142590;NM_001308114	Body;Body;Body;Body;Body;Body;Body						0.415669	0.908831	0.493161
cg08792177	37	1	41234579	NFYC;NFYC;NFYC;NFYC;NFYC;NFYC;NFYC	NM_001308115;NM_001142588;NM_001142587;NM_014223;NM_001142589;NM_001142590;NM_001308114	Body;Body;Body;Body;Body;Body;Body						0.312681	0.670411	0.35773
cg08006659	37	1	41234852	NFYC;NFYC;NFYC;NFYC;NFYC;NFYC;NFYC	NM_001308115;NM_001142588;NM_001142587;NM_014223;NM_001142589;NM_001142590;NM_001308114	Body;Body;Body;Body;Body;Body;Body						0.444435	0.907519	0.463084
cg21842807	37	1	41235484	NFYC;NFYC;NFYC;NFYC;NFYC;NFYC;NFYC	NM_001308115;NM_001142588;NM_001142587;NM_014223;NM_001142589;NM_001142590;NM_001308114	Body;Body;Body;Body;Body;Body;Body						0.555052	0.821115	0.266063
cg17740524	37	1	41236494	NFYC;NFYC;NFYC;NFYC;NFYC;NFYC;NFYC	NM_001308115;NM_001142588;NM_001142587;NM_014223;NM_001142589;NM_001142590;NM_001308114	Body;Body;Body;Body;Body;Body;Body						0.32068	0.602242	0.281562
cg12601395	37	1	41240656									0.305479	0.621268	0.315789
cg00910616	37	1	41245733				chr1:41249090-41250161	N_Shelf			TRUE	0.618203	0.904992	0.286789
cg13915759	37	1	41281484	KCNQ4;KCNQ4	NM_172163;NM_004700	Body;Body	chr1:41283840-41284591	N_Shelf				0.352592	0.67037	0.317778
cg08206884	37	1	41295741	KCNQ4;KCNQ4	NM_172163;NM_004700	Body;Body						0.450175	0.826467	0.376292
cg01074104	37	1	41324394				chr1:41326949-41328285	N_Shelf			TRUE	0.505166	0.875217	0.370051
cg04011995	37	1	41326317				chr1:41326949-41328285	N_Shore			TRUE	0.492964	0.909067	0.416103
cg06021832	37	1	41329406	CITED4	NM_133467	TSS1500	chr1:41326949-41328285	S_Shore				0.411423	0.787065	0.375643
cg17309322	37	1	41352504				chr1:41349740-41350293	S_Shelf				0.411615	0.671264	0.259649
cg27571590	37	1	41353616				chr1:41349740-41350293	S_Shelf			TRUE	0.418169	0.858759	0.44059
cg17590083	37	1	41364730								TRUE	0.49858	0.789413	0.290832
cg06954187	37	1	41364856									0.422564	0.869388	0.446824
cg14580666	37	1	41388636									0.518493	0.830914	0.312422
cg16085019	37	1	41396096									0.397599	0.851048	0.45345
cg08900518	37	1	41410216								TRUE	0.32841	0.656139	0.327729
cg07058316	37	1	41418009									0.321637	0.628229	0.306591
cg06083001	37	1	41478189	CTPS	NM_001905	3'UTR					TRUE	0.484251	0.871614	0.387363
cg13291156	37	1	41489547	SLFNL1-AS1	NR_037868	Body						0.63561	0.887717	0.252107
cg06633426	37	1	41511239	SCMH1;SCMH1	NM_001031694;NM_012236	Body;Body					TRUE	0.433809	0.888709	0.454899
cg10866548	37	1	41511511	SCMH1;SCMH1;SCMH1;SCMH1;SCMH1;SCMH1;SCMH1	NM_001172218;NM_001172221;NM_001172220;NM_001031694;NM_001172222;NM_012236;NM_001172219	Body;Body;Body;Body;Body;Body;Body						0.187321	0.522094	0.334773
cg02568084	37	1	41512396	SCMH1;SCMH1;SCMH1;SCMH1;SCMH1;SCMH1;SCMH1	NM_001172218;NM_001172221;NM_001172220;NM_001031694;NM_001172222;NM_012236;NM_001172219	Body;Body;Body;Body;Body;Body;Body						0.378149	0.887962	0.509813
cg12572682	37	1	41618678	SCMH1;SCMH1;SCMH1;SCMH1;SCMH1;SCMH1;SCMH1	NM_001031694;NM_001172221;NM_001172222;NM_012236;NM_001172219;NM_001172218;NM_001172220	5'UTR;5'UTR;Body;Body;Body;5'UTR;5'UTR						0.365213	0.676053	0.31084
cg13750140	37	1	41688346	SCMH1;SCMH1;SCMH1;SCMH1	NM_001172218;NM_001172220;NM_012236;NM_001172219	5'UTR;5'UTR;5'UTR;5'UTR						0.571464	0.835073	0.263609
cg02390614	37	1	41692723	SCMH1;SCMH1;SCMH1;SCMH1	NM_001172218;NM_001172220;NM_012236;NM_001172219	5'UTR;5'UTR;5'UTR;5'UTR						0.390095	0.687531	0.297435
cg13904936	37	1	41824282				chr1:41826680-41828290	N_Shelf				0.663552	0.951885	0.288333
cg18936222	37	1	41826028				chr1:41826680-41828290	N_Shore		chr1:41825927-41825927		0.368934	0.730426	0.361493
cg02221572	37	1	41826321	FOXO6	NM_001291281	TSS1500	chr1:41826680-41828290	N_Shore				0.413578	0.728792	0.315215
cg16667869	37	1	41831580	FOXO6	NM_001291281	Body	chr1:41831976-41832542	N_Shore		chr1:41831444-41831444		0.263002	0.683533	0.42053
cg19619003	37	1	41846758				chr1:41847264-41849204	N_Shore			TRUE	0.116416	0.421266	0.304849
cg12713481	37	1	41885166							chr1:41885108-41885108		0.344966	0.616317	0.271351
cg06005684	37	1	41902663									0.476959	0.836693	0.359734
cg19460561	37	1	41914416									0.505023	0.776304	0.271281
cg04566799	37	1	41914702							chr1:41914594-41914594		0.454334	0.745021	0.290687
cg05724479	37	1	41916132									0.380723	0.655354	0.274631
cg18927178	37	1	41934032									0.479578	0.818608	0.33903
cg06169284	37	1	41939629									0.356239	0.696603	0.340364
cg07563342	37	1	41949761	EDN2;EDN2;EDN2	NR_126098;NM_001302269;NM_001956	Body;Body;Body						0.40203	0.775255	0.373225
cg20367961	37	1	41950237	EDN2	NM_001956	1stExon					TRUE	0.375088	0.688382	0.313294
cg24427649	37	1	41965606				chr1:41961850-41962316	S_Shelf				0.418122	0.725943	0.307821
cg00861010	37	1	41966113				chr1:41961850-41962316	S_Shelf			TRUE	0.410844	0.902178	0.491334
cg05388840	37	1	41981911	HIVEP3;HIVEP3	NM_024503;NM_001127714	Body;Body	chr1:41981788-41982043	Island		chr1:41981831-41981831	TRUE	0.111178	0.404282	0.293105
cg11177980	37	1	41982115	HIVEP3;HIVEP3	NM_024503;NM_001127714	Body;Body	chr1:41981788-41982043	S_Shore			TRUE	0.143194	0.432162	0.288969
cg13170051	37	1	41982392	HIVEP3;HIVEP3	NM_024503;NM_001127714	Body;Body	chr1:41981788-41982043	S_Shore			TRUE	0.0996717	0.354556	0.254884
cg06251321	37	1	42079018	HIVEP3;HIVEP3	NM_001127714;NM_024503	5'UTR;5'UTR						0.489303	0.795998	0.306696
cg23407172	37	1	42085962	HIVEP3;HIVEP3	NM_001127714;NM_024503	5'UTR;5'UTR						0.322034	0.750581	0.428547
cg08484188	37	1	42131367	HIVEP3;HIVEP3	NM_024503;NM_001127714	5'UTR;5'UTR	chr1:42127380-42128632	S_Shelf			TRUE	0.389926	0.757425	0.367499
cg10677798	37	1	42215804	HIVEP3;HIVEP3	NM_001127714;NM_024503	5'UTR;5'UTR						0.275837	0.61241	0.336573
cg05634256	37	1	42238968	HIVEP3;HIVEP3	NM_001127714;NM_024503	5'UTR;5'UTR						0.30202	0.721135	0.419115
cg04995157	37	1	42255618	HIVEP3;HIVEP3	NM_001127714;NM_024503	5'UTR;5'UTR						0.575003	0.909789	0.334786
cg08005801	37	1	42269481	HIVEP3;HIVEP3	NM_001127714;NM_024503	5'UTR;5'UTR						0.367036	0.805972	0.438936
cg04464434	37	1	42325582	HIVEP3;HIVEP3;HIVEP3;HIVEP3	NM_001127714;NM_024503;NR_038260;NR_038261	5'UTR;5'UTR;Body;Body						0.283134	0.580812	0.297678
cg02567157	37	1	42326795	HIVEP3;HIVEP3;HIVEP3;HIVEP3	NM_001127714;NM_024503;NR_038260;NR_038261	5'UTR;5'UTR;Body;Body						0.524437	0.879192	0.354755
cg15644324	37	1	42384647	HIVEP3;HIVEP3	NM_001127714;NM_024503	TSS200;TSS200	chr1:42383640-42384003	S_Shore			TRUE	0.156524	0.412785	0.256261
cg22405962	37	1	42469173	HIVEP3	NR_038261	Body						0.489831	0.892337	0.402506
cg13582711	37	1	42500379				chr1:42500855-42501980	N_Shore			TRUE	0.348045	0.681584	0.333538
cg00178427	37	1	42500551				chr1:42500855-42501980	N_Shore			TRUE	0.256457	0.626153	0.369695
cg14093106	37	1	42503579				chr1:42500855-42501980	S_Shore			TRUE	0.328533	0.624089	0.295556
cg06412047	37	1	42603715									0.544073	0.819674	0.275601
cg24583987	37	1	42618041	GUCA2B	NM_007102	TSS1500					TRUE	0.313537	0.648898	0.335361
cg17100200	37	1	42618313	GUCA2B	NM_007102	TSS1500					TRUE	0.50942	0.806854	0.297435
cg19701019	37	1	42630433	GUCA2A	NM_033553	TSS200						0.547729	0.886449	0.33872
cg13452215	37	1	42630436	GUCA2A	NM_033553	TSS200					TRUE	0.571272	0.91119	0.339918
cg25678435	37	1	42671940	FOXJ3;FOXJ3;FOXJ3;FOXJ3	NM_001198850;NM_001198852;NM_014947;NM_001198851	Body;Body;Body;Body						0.584142	0.868891	0.284749
cg06661720	37	1	42675767	FOXJ3;FOXJ3;FOXJ3;FOXJ3	NM_001198850;NM_001198852;NM_014947;NM_001198851	Body;Body;Body;Body						0.32337	0.759035	0.435665
cg10105501	37	1	42836436									0.425446	0.811091	0.385646
cg21396630	37	1	42886004	RIMKLA	NM_173642	3'UTR					TRUE	0.403989	0.734776	0.330787
cg24501381	37	1	43001072	CCDC30	NM_001080850	5'UTR					TRUE	0.427721	0.842723	0.415002
cg20313362	37	1	43158569	YBX1	NM_004559	Body					TRUE	0.40782	0.765666	0.357846
cg03498373	37	1	43158968	YBX1	NM_004559	Body			low-CpG:42931544-42931589			0.471859	0.837189	0.365331
cg06654076	37	1	43202523	CLDN19;CLDN19	NM_148960;NM_001123395	Body;Body	chr1:43204115-43204323	N_Shore			TRUE	0.44818	0.852302	0.404121
cg27507254	37	1	43206037	CLDN19;CLDN19	NM_148960;NM_001123395	TSS200;TSS200	chr1:43204115-43204323	S_Shore			TRUE	0.451222	0.708019	0.256797
cg04118124	37	1	43231249	LEPRE1;LEPRE1	NM_022356;NM_001146289	Body;Body	chr1:43232214-43233359	N_Shore			TRUE	0.229462	0.503172	0.27371
cg03099146	37	1	43252206	LOC100129924	NM_001242750	TSS1500	chr1:43250762-43251082	S_Shore				0.372562	0.640135	0.267573
cg13335797	37	1	43252273	LOC100129924	NM_001242750	TSS1500	chr1:43250762-43251082	S_Shore				0.469779	0.802763	0.332984
cg21474257	37	1	43399327	SLC2A1	NM_006516	Body					TRUE	0.591953	0.890977	0.299023
cg16738646	37	1	43409193	SLC2A1	NM_006516	Body					TRUE	0.294876	0.583422	0.288546
cg20294984	37	1	43412752	SLC2A1	NM_006516	Body					TRUE	0.657637	0.942916	0.285279
cg22025263	37	1	43419475	SLC2A1	NM_006516	Body	chr1:43423467-43424768	N_Shelf			TRUE	0.358245	0.833222	0.474977
cg00737593	37	1	43422337	SLC2A1	NM_006516	Body	chr1:43423467-43424768	N_Shore			TRUE	0.423758	0.749723	0.325965
cg20282814	37	1	43423072	SLC2A1	NM_006516	Body	chr1:43423467-43424768	N_Shore			TRUE	0.412752	0.691722	0.278971
cg14885273	37	1	43427403	SLC2A1-AS1	NR_033967	Body	chr1:43423467-43424768	S_Shelf				0.418655	0.827885	0.40923
cg03967651	37	1	43447310	SLC2A1-AS1	NR_033967	Body						0.402443	0.865787	0.463345
cg08061508	37	1	43458155									0.41641	0.810901	0.394491
cg00344209	37	1	43471256				chr1:43472867-43473334	N_Shore			TRUE	0.531217	0.850903	0.319686
cg11453325	37	1	43471569				chr1:43472867-43473334	N_Shore		chr1:43471435-43471435		0.422592	0.823054	0.400462
cg09476154	37	1	43472373				chr1:43472867-43473334	N_Shore			TRUE	0.611665	0.862138	0.250474
cg05259305	37	1	43473392				chr1:43472867-43473334	S_Shore		chr1:43473183-43473183		0.303929	0.708706	0.404777
cg16769869	37	1	43487359									0.294281	0.551597	0.257315
cg07857942	37	1	43488142									0.391637	0.818345	0.426708
cg08529269	37	1	43514755								TRUE	0.262066	0.649654	0.387588
cg12196982	37	1	43515155									0.298935	0.649899	0.350964
cg05298361	37	1	43523975									0.595052	0.851948	0.256896
cg12718161	37	1	43530867				chr1:43533890-43534334	N_Shelf				0.346507	0.762096	0.415589
cg16655129	37	1	43535396				chr1:43533890-43534334	S_Shore				0.51594	0.917641	0.401701
cg09988116	37	1	43750693	C1orf210;C1orf210	NM_182517;NM_001164829	5'UTR;5'UTR					TRUE	0.595659	0.850532	0.254872
cg12752420	37	1	43751363	C1orf210;C1orf210	NM_001164829;NM_182517	TSS200;TSS200					TRUE	0.39957	0.710819	0.311249
cg00500789	37	1	43751370	C1orf210;C1orf210	NM_001164829;NM_182517	TSS200;TSS200					TRUE	0.389815	0.703864	0.314048
cg23800435	37	1	43751376	C1orf210;C1orf210	NM_001164829;NM_182517	TSS200;TSS200					TRUE	0.378379	0.642799	0.264419
cg24464789	37	1	43751497	C1orf210;C1orf210	NM_001164829;NM_182517	TSS1500;TSS1500					TRUE	0.376878	0.729406	0.352528
cg02990330	37	1	43751504	C1orf210;C1orf210	NM_001164829;NM_182517	TSS1500;TSS1500					TRUE	0.408165	0.851175	0.44301
cg01095482	37	1	43765796	TIE1;TIE1	NM_001253357;NM_005424	TSS1500;TSS1500						0.544763	0.819666	0.274903
cg07977713	37	1	43814169	MPL	NM_005373	Body	chr1:43814305-43815277	N_Shore			TRUE	0.330974	0.767852	0.436878
cg18856478	37	1	43814358	MPL	NM_005373	Body	chr1:43814305-43815277	Island			TRUE	0.145292	0.412688	0.267397
cg10441898	37	1	43839507							chr1:43839359-43839359	TRUE	0.362848	0.737341	0.374493
cg12235622	37	1	43856473	C1orf84;MED8;MED8	NM_001012961;NM_052877;NM_201542	Body;TSS1500;TSS1500	chr1:43855375-43855921	S_Shore			TRUE	0.357197	0.616742	0.259544
cg22309428	37	1	43903091	SZT2;SZT2	NM_015284;NM_015284	ExonBnd;Body						0.552394	0.899133	0.346739
cg02157034	37	1	43959843									0.505225	0.789722	0.284497
cg02839334	37	1	43975323									0.30635	0.646653	0.340303
cg08300037	37	1	43998080	PTPRF;PTPRF	NM_130440;NM_002840	5'UTR;5'UTR	chr1:43996724-43997592	S_Shore		chr1:43997843-43997843		0.189029	0.464224	0.275195
cg21268658	37	1	43998294	PTPRF;PTPRF	NM_002840;NM_130440	5'UTR;5'UTR	chr1:43996724-43997592	S_Shore			TRUE	0.21739	0.634389	0.416999
cg00007221	37	1	43999020	PTPRF;PTPRF	NM_002840;NM_130440	5'UTR;5'UTR	chr1:43996724-43997592	S_Shore			TRUE	0.216763	0.614504	0.397741
cg16651520	37	1	44002186	PTPRF;PTPRF	NM_130440;NM_002840	5'UTR;5'UTR						0.390956	0.779822	0.388866
cg27552560	37	1	44003172	PTPRF;PTPRF	NM_130440;NM_002840	5'UTR;5'UTR						0.348317	0.808436	0.460119
cg27613592	37	1	44007693	PTPRF;PTPRF	NM_130440;NM_002840	5'UTR;5'UTR						0.337035	0.845722	0.508686
cg09884599	37	1	44044046	PTPRF;PTPRF	NM_130440;NM_002840	Body;Body						0.395994	0.859259	0.463265
cg09971583	37	1	44047845	PTPRF;PTPRF	NM_130440;NM_002840	Body;Body						0.471459	0.877492	0.406032
cg09294702	37	1	44051756	PTPRF;PTPRF	NM_130440;NM_002840	Body;Body						0.291468	0.690789	0.399321
cg24872116	37	1	44052278	PTPRF;PTPRF	NM_130440;NM_002840	Body;Body						0.316765	0.697736	0.38097
cg25219246	37	1	44053380	PTPRF;PTPRF	NM_002840;NM_130440	Body;Body	chr1:44056755-44057179	N_Shelf			TRUE	0.257811	0.544685	0.286874
cg18327315	37	1	44068790	PTPRF;PTPRF	NM_130440;NM_002840	Body;Body	chr1:44070892-44071142	N_Shelf				0.536493	0.846978	0.310484
cg00946598	37	1	44117093	KDM4A	NM_014663	5'UTR	chr1:44115616-44116309	S_Shore			TRUE	0.326125	0.74703	0.420905
cg08462360	37	1	44119109	KDM4A	NM_014663	Body	chr1:44115616-44116309	S_Shelf			TRUE	0.485888	0.812827	0.32694
cg00780262	37	1	44131923	KDM4A	NM_014663	Body						0.590878	0.907137	0.316259
cg15589689	37	1	44170389	KDM4A	NM_014663	3'UTR	chr1:44172668-44173763	N_Shelf			TRUE	0.336891	0.841286	0.504396
cg20625039	37	1	44170469	KDM4A;KDM4A-AS1	NM_014663;NR_033827	3'UTR;Body	chr1:44172668-44173763	N_Shelf				0.496755	0.843414	0.346659
cg01495867	37	1	44170473	KDM4A;KDM4A-AS1	NM_014663;NR_033827	3'UTR;Body	chr1:44172668-44173763	N_Shelf				0.43863	0.867666	0.429035
cg24283375	37	1	44197870	ST3GAL3;ST3GAL3;ST3GAL3;ST3GAL3;ST3GAL3;ST3GAL3;ST3GAL3;ST3GAL3;ST3GAL3;ST3GAL3;ST3GAL3;ST3GAL3;ST3GAL3;ST3GAL3;ST3GAL3;ST3GAL3;ST3GAL3;ST3GAL3;ST3GAL3;ST3GAL3;ST3GAL3;ST3GAL3;ST3GAL3;ST3GAL3;ST3GAL3	NM_174968;NM_174967;NM_174966;NM_174965;NM_174964;NM_174963;NM_006279;NM_001270459;NM_001270460;NM_001270461;NM_001270462;NM_001270463;NM_001270464;NM_001270465;NM_001270466;NM_174971;NM_174970;NM_174969;NR_073019;NR_073017;NR_073018;NR_073023;NR_073016;NR_073020;NR_073021	5'UTR;5'UTR;5'UTR;5'UTR;5'UTR;5'UTR;5'UTR;5'UTR;5'UTR;5'UTR;5'UTR;5'UTR;5'UTR;5'UTR;5'UTR;5'UTR;5'UTR;5'UTR;Body;Body;Body;Body;Body;Body;Body						0.271646	0.647982	0.376336
cg08503814	37	1	44232216	ST3GAL3;ST3GAL3;ST3GAL3;ST3GAL3;ST3GAL3;ST3GAL3;ST3GAL3;ST3GAL3;ST3GAL3;ST3GAL3;ST3GAL3;ST3GAL3;ST3GAL3;ST3GAL3;ST3GAL3;ST3GAL3;ST3GAL3;ST3GAL3;ST3GAL3;ST3GAL3;ST3GAL3;ST3GAL3;ST3GAL3;ST3GAL3;ST3GAL3	NR_073019;NR_073017;NR_073018;NR_073023;NR_073016;NR_073020;NR_073021;NM_001270465;NM_001270463;NM_001270464;NM_001270466;NM_174967;NM_174965;NM_174970;NM_174968;NM_174966;NM_174964;NM_174963;NM_006279;NM_001270459;NM_001270460;NM_001270461;NM_001270462;NM_174971;NM_174969	Body;Body;Body;Body;Body;Body;Body;Body;Body;Body;Body;Body;Body;Body;Body;Body;Body;Body;Body;Body;Body;Body;Body;Body;Body				chr1:44232152-44232152		0.256387	0.515124	0.258737
cg23290313	37	1	44287964	ST3GAL3;ST3GAL3;ST3GAL3;ST3GAL3;ST3GAL3;ST3GAL3;ST3GAL3;ST3GAL3;ST3GAL3;ST3GAL3	NM_174968;NM_006279;NM_174971;NM_174963;NM_174967;NM_174969;NM_174970;NM_174964;NM_174965;NM_174966	Body;Body;Body;Body;Body;Body;Body;Body;Body;Body					TRUE	0.285423	0.602187	0.316764
cg19768360	37	1	44304792	ST3GAL3;ST3GAL3;ST3GAL3;ST3GAL3;ST3GAL3;ST3GAL3;ST3GAL3;ST3GAL3;ST3GAL3;ST3GAL3;ST3GAL3;ST3GAL3;ST3GAL3;ST3GAL3;ST3GAL3;ST3GAL3;ST3GAL3;ST3GAL3;ST3GAL3;ST3GAL3;ST3GAL3;ST3GAL3;ST3GAL3;ST3GAL3;ST3GAL3	NR_073019;NR_073017;NR_073018;NR_073023;NR_073016;NR_073020;NR_073021;NM_001270465;NM_001270463;NM_001270464;NM_001270466;NM_174967;NM_174965;NM_174970;NM_174968;NM_174966;NM_174964;NM_174963;NM_006279;NM_001270459;NM_001270460;NM_001270461;NM_001270462;NM_174971;NM_174969	Body;Body;Body;Body;Body;Body;Body;Body;Body;Body;Body;Body;Body;Body;Body;Body;Body;Body;Body;Body;Body;Body;Body;Body;Body						0.51142	0.804916	0.293495
cg26396357	37	1	44324656	ST3GAL3;ST3GAL3;ST3GAL3;ST3GAL3;ST3GAL3;ST3GAL3;ST3GAL3;ST3GAL3;ST3GAL3;ST3GAL3	NM_174968;NM_006279;NM_174971;NM_174963;NM_174967;NM_174969;NM_174970;NM_174964;NM_174965;NM_174966	Body;Body;Body;Body;Body;Body;Body;Body;Body;Body					TRUE	0.546536	0.846399	0.299863
cg19793803	37	1	44327018	ST3GAL3;ST3GAL3;ST3GAL3;ST3GAL3;ST3GAL3;ST3GAL3;ST3GAL3;ST3GAL3;ST3GAL3;ST3GAL3;ST3GAL3;ST3GAL3;ST3GAL3;ST3GAL3;ST3GAL3;ST3GAL3;ST3GAL3;ST3GAL3;ST3GAL3;ST3GAL3;ST3GAL3;ST3GAL3;ST3GAL3;ST3GAL3;ST3GAL3	NR_073019;NR_073017;NR_073018;NR_073023;NR_073016;NR_073020;NR_073021;NM_001270465;NM_001270463;NM_001270464;NM_001270466;NM_174967;NM_174965;NM_174970;NM_174968;NM_174966;NM_174964;NM_174963;NM_006279;NM_001270459;NM_001270460;NM_001270461;NM_001270462;NM_174971;NM_174969	Body;Body;Body;Body;Body;Body;Body;Body;Body;Body;Body;Body;Body;Body;Body;Body;Body;Body;Body;Body;Body;Body;Body;Body;Body						0.383838	0.723754	0.339916
cg07166795	37	1	44351061	ST3GAL3;ST3GAL3;ST3GAL3;ST3GAL3;ST3GAL3;ST3GAL3;ST3GAL3;ST3GAL3;ST3GAL3;ST3GAL3	NM_174968;NM_006279;NM_174971;NM_174963;NM_174967;NM_174969;NM_174970;NM_174964;NM_174965;NM_174966	Body;Body;Body;Body;Body;Body;Body;Body;Body;Body					TRUE	0.471214	0.923325	0.452112
cg06195007	37	1	44367409	ST3GAL3;ST3GAL3;ST3GAL3;ST3GAL3;ST3GAL3;ST3GAL3;ST3GAL3;ST3GAL3;ST3GAL3;ST3GAL3;ST3GAL3;ST3GAL3;ST3GAL3;ST3GAL3;ST3GAL3;ST3GAL3;ST3GAL3;ST3GAL3;ST3GAL3;ST3GAL3;ST3GAL3;ST3GAL3;ST3GAL3;ST3GAL3;ST3GAL3	NM_001270465;NR_073019;NR_073017;NR_073018;NR_073023;NR_073016;NR_073020;NR_073021;NM_001270463;NM_001270464;NM_001270466;NM_174967;NM_174965;NM_174970;NM_174968;NM_174966;NM_174964;NM_174963;NM_006279;NM_001270459;NM_001270460;NM_001270461;NM_001270462;NM_174971;NM_174969	3'UTR;Body;Body;Body;Body;Body;Body;Body;Body;Body;Body;Body;Body;Body;Body;Body;Body;Body;Body;Body;Body;Body;Body;Body;Body						0.438195	0.799703	0.361508
cg22617819	37	1	44378782	ST3GAL3;ST3GAL3;ST3GAL3;ST3GAL3;ST3GAL3;ST3GAL3;ST3GAL3;ST3GAL3;ST3GAL3;ST3GAL3	NM_174968;NM_006279;NM_174971;NM_174963;NM_174967;NM_174969;NM_174970;NM_174964;NM_174965;NM_174966	Body;Body;Body;Body;Body;Body;Body;Body;Body;Body					TRUE	0.424949	0.706337	0.281388
cg03718806	37	1	44380932	ST3GAL3;ST3GAL3;ST3GAL3;ST3GAL3;ST3GAL3;ST3GAL3;ST3GAL3;ST3GAL3;ST3GAL3;ST3GAL3;ST3GAL3;ST3GAL3;ST3GAL3;ST3GAL3;ST3GAL3;ST3GAL3;ST3GAL3;ST3GAL3;ST3GAL3;ST3GAL3;ST3GAL3;ST3GAL3;ST3GAL3;ST3GAL3;ST3GAL3	NM_001270465;NR_073019;NR_073017;NR_073018;NR_073023;NR_073016;NR_073020;NR_073021;NM_001270463;NM_001270464;NM_001270466;NM_174967;NM_174965;NM_174970;NM_174968;NM_174966;NM_174964;NM_174963;NM_006279;NM_001270459;NM_001270460;NM_001270461;NM_001270462;NM_174971;NM_174969	3'UTR;Body;Body;Body;Body;Body;Body;Body;Body;Body;Body;Body;Body;Body;Body;Body;Body;Body;Body;Body;Body;Body;Body;Body;Body				chr1:44380893-44380893		0.392503	0.804371	0.411867
cg00053617	37	1	44418775	IPO13	NM_014652	Body						0.402217	0.7191	0.316883
cg02326794	37	1	44418783	IPO13	NM_014652	Body						0.628369	0.879364	0.250995
cg11134246	37	1	44458001	CCDC24	NM_152499	Body	chr1:44457150-44457772	S_Shore			TRUE	0.582089	0.841939	0.259849
cg04833514	37	1	44497537	SLC6A9	NM_001024845	TSS1500	chr1:44495629-44497112	S_Shore			TRUE	0.379034	0.815116	0.436082
cg04093149	37	1	44497595	SLC6A9	NM_001024845	TSS1500	chr1:44495629-44497112	S_Shore			TRUE	0.268854	0.681054	0.4122
cg18183642	37	1	44497694	SLC6A9	NM_001024845	TSS1500	chr1:44495629-44497112	S_Shore			TRUE	0.36443	0.783418	0.418988
cg04676245	37	1	44498175	SLC6A9;SLC6A9	NM_001024845;NR_048549	TSS1500;TSS1500	chr1:44495629-44497112	S_Shore				0.315129	0.726947	0.411818
cg12686603	37	1	44498522	SLC6A9;SLC6A9	NM_001024845;NR_048549	TSS1500;TSS1500	chr1:44495629-44497112	S_Shore				0.372928	0.880934	0.508005
cg09801837	37	1	44567128				chr1:44568991-44569399	N_Shore			TRUE	0.507323	0.816471	0.309148
cg21437596	37	1	44678191	DMAP1;DMAP1;DMAP1	NM_001034023;NM_019100;NM_001034024	TSS1500;TSS1500;TSS1500	chr1:44679003-44679465	N_Shore			TRUE	0.449036	0.87628	0.427244
cg18192074	37	1	44685971	DMAP1;DMAP1;DMAP1	NM_019100;NM_001034023;NM_001034024	Body;Body;Body					TRUE	0.583148	0.87691	0.293761
cg04486940	37	1	44727010	ERI3	NM_024066	Body					TRUE	0.420018	0.902832	0.482814
cg16681083	37	1	44727237	ERI3	NM_024066	Body					TRUE	0.506362	0.820233	0.313871
cg26233866	37	1	44727284	ERI3	NM_024066	Body					TRUE	0.454229	0.85667	0.402441
cg11424674	37	1	44727313	ERI3	NM_024066	Body					TRUE	0.624153	0.882341	0.258188
cg15833565	37	1	44741190	ERI3	NM_024066	Body					TRUE	0.273245	0.591246	0.318001
cg15657287	37	1	44741964	ERI3;ERI3;ERI3;ERI3;ERI3	NM_001301701;NM_001301699;NM_001301698;NM_024066;NM_001301700	Body;Body;Body;Body;Body						0.321315	0.694222	0.372907
cg04264144	37	1	44759823	ERI3;ERI3;ERI3;ERI3;ERI3	NM_001301701;NM_001301699;NM_001301698;NM_024066;NM_001301700	Body;Body;Body;Body;Body						0.238539	0.496975	0.258436
cg04576058	37	1	44793357	ERI3;ERI3;ERI3;ERI3;ERI3	NM_001301701;NM_001301699;NM_001301698;NM_024066;NM_001301700	5'UTR;Body;Body;Body;Body						0.473699	0.818043	0.344344
cg17223866	37	1	44794158	ERI3	NM_024066	Body					TRUE	0.410617	0.804423	0.393807
cg23671739	37	1	44990495	RNF220	NM_018150	Body						0.31444	0.642137	0.327697
cg10329345	37	1	45083079	RNF220	NM_018150	Body	chr1:45082739-45083285	Island			TRUE	0.259619	0.521298	0.26168
cg13189207	37	1	45083124	RNF220	NM_018150	Body	chr1:45082739-45083285	Island			TRUE	0.254979	0.56759	0.31261
cg20944964	37	1	45083207	RNF220	NM_018150	Body	chr1:45082739-45083285	Island			TRUE	0.170634	0.486469	0.315835
cg26098401	37	1	45083278	RNF220	NM_018150	Body	chr1:45082739-45083285	Island		chr1:45083225-45083225	TRUE	0.236071	0.553316	0.317245
cg15564347	37	1	45126072	TMEM53;TMEM53;TMEM53;TMEM53	NM_001300748;NM_001300747;NM_024587;NM_001300746	Body;Body;Body;5'UTR						0.171039	0.452696	0.281657
cg10319709	37	1	45155097	C1orf228	NM_001145636	5'UTR					TRUE	0.396196	0.795943	0.399748
cg07357370	37	1	45243294	RPS8;SNORD38A;SNORD38B;RPS8	NM_001012;NR_001456;NR_001457;NM_001012	Body;TSS1500;TSS1500;ExonBnd	chr1:45241013-45241900	S_Shore				0.443333	0.768195	0.324862
cg02072975	37	1	45249541	BEST4	NM_153274	3'UTR	chr1:45249860-45250352	N_Shore			TRUE	0.296683	0.657561	0.360878
cg07937270	37	1	45272633	TCTEX1D4;TCTEX1D4	NM_001013632;NM_001013632	5'UTR;1stExon	chr1:45271679-45272318	S_Shore			TRUE	0.533204	0.828747	0.295544
cg24643057	37	1	45281185				chr1:45278765-45279644	S_Shore				0.251543	0.506683	0.255141
cg08553384	37	1	45282924				chr1:45278765-45279644	S_Shelf				0.555349	0.815103	0.259754
cg08470094	37	1	45347161	EIF2B3;EIF2B3;EIF2B3	NM_020365;NM_001261418;NM_001166588	Body;Body;Body						0.271883	0.609416	0.337533
cg16817426	37	1	45807214	MUTYH;MUTYH;TOE1;MUTYH;MUTYH;MUTYH	NM_012222;NM_001048173;NM_025077;NM_001048171;NM_001048172;NM_001128425	TSS1500;TSS1500;Body;TSS1500;TSS1500;TSS1500	chr1:45805564-45805983	S_Shore			TRUE	0.476563	0.799207	0.322644
cg02657611	37	1	45814632	TESK2	NM_007170	Body					TRUE	0.227963	0.57961	0.351647
cg18317367	37	1	45869190	TESK2	NM_007170	Body						0.405966	0.86556	0.459595
cg10186336	37	1	45910779	TESK2	NM_007170	Body						0.448104	0.892586	0.444482
cg02706970	37	1	45924785	TESK2	NM_007170	5'UTR						0.394596	0.790147	0.395551
cg11279237	37	1	45982307	PRDX1;PRDX1;PRDX1;PRDX1	NM_001202431;NM_002574;NM_181696;NM_181697	Body;Body;Body;Body						0.558597	0.915983	0.357386
cg09791107	37	1	46023269	AKR1A1;AKR1A1;AKR1A1;AKR1A1	NM_001202414;NM_001202413;NM_006066;NM_153326	5'UTR;5'UTR;5'UTR;5'UTR						0.340814	0.705763	0.364949
cg00033580	37	1	46034265	AKR1A1;AKR1A1;AKR1A1;AKR1A1	NM_001202414;NM_001202413;NM_006066;NM_153326	Body;Body;Body;Body						0.315692	0.796461	0.480769
cg14692131	37	1	46035685	AKR1A1;AKR1A1;AKR1A1;AKR1A1	NM_001202414;NM_001202413;NM_006066;NM_153326	3'UTR;3'UTR;3'UTR;3'UTR						0.355034	0.613303	0.258268
cg17191639	37	1	46078694	NASP;NASP;NASP	NM_152298;NM_002482;NM_001195193	Body;Body;Body						0.516762	0.932375	0.415613
cg11750580	37	1	46088336	CCDC17	NM_001114938	Body	chr1:46088194-46089142	Island			TRUE	0.389559	0.673071	0.283512
cg02987388	37	1	46089045	CCDC17	NM_001114938	Body	chr1:46088194-46089142	Island			TRUE	0.27938	0.586303	0.306923
cg09893068	37	1	46089593	CCDC17;CCDC17	NM_001114938;NM_001114938	5'UTR;1stExon	chr1:46088194-46089142	S_Shore			TRUE	0.536342	0.853417	0.317075
cg15705203	37	1	46089693	CCDC17;CCDC17	NM_001114938;NM_001114938	5'UTR;1stExon	chr1:46088194-46089142	S_Shore			TRUE	0.337716	0.591332	0.253617
cg06784218	37	1	46089804	CCDC17	NM_001114938	TSS200	chr1:46088194-46089142	S_Shore			TRUE	0.16644	0.416508	0.250068
cg22635120	37	1	46090107	CCDC17;CCDC17	NM_001114938;NM_001190182	TSS1500;TSS1500	chr1:46088194-46089142	S_Shore				0.479106	0.861954	0.382848
cg16907488	37	1	46090169	CCDC17	NM_001114938	TSS1500	chr1:46088194-46089142	S_Shore			TRUE	0.571988	0.872934	0.300947
cg20237294	37	1	46120973	GPBP1L1;GPBP1L1	NM_021639;NM_021639	ExonBnd;Body						0.483945	0.861846	0.377901
cg16720242	37	1	46196138	IPP;IPP	NM_005897;NM_001145349	Body;Body					TRUE	0.469761	0.886308	0.416548
cg04038943	37	1	46196297	IPP;IPP	NM_001145349;NM_005897	Body;Body						0.232834	0.633064	0.40023
cg00070635	37	1	46358168	MAST2	NM_015112	Body						0.228538	0.631012	0.402474
cg15510965	37	1	46505350									0.134577	0.386671	0.252095
cg21005237	37	1	46543382	PIK3R3;PIK3R3;PIK3R3;PIK3R3;PIK3R3	NM_003629;NM_001303429;NM_001114172;NM_001303428;NM_001303427	Body;Body;Body;Body;Body						0.427428	0.882983	0.455555
cg20630926	37	1	46601365	LOC101929626;PIK3R3	NR_125987;NM_001303427	Body;Body	chr1:46598126-46599129	S_Shelf				0.24997	0.673614	0.423643
cg08638929	37	1	46640255	TSPAN1	NM_005727	TSS1500					TRUE	0.236886	0.548449	0.311564
cg02896515	37	1	46645968	TSPAN1	NM_005727	5'UTR					TRUE	0.325913	0.689309	0.363396
cg19321695	37	1	46646158	TSPAN1	NM_005727	5'UTR					TRUE	0.353733	0.67299	0.319256
cg04975920	37	1	46646224	TSPAN1	NM_005727	5'UTR					TRUE	0.306167	0.558245	0.252078
cg02141144	37	1	46649464	TSPAN1	NM_005727	Body						0.409803	0.86376	0.453957
cg04089800	37	1	46654770	POMGNT1;POMGNT1	NM_017739;NR_024332	3'UTR;Body					TRUE	0.342897	0.643696	0.300798
cg09055950	37	1	46660034	POMGNT1;POMGNT1;POMGNT1;POMGNT1	NM_001290130;NM_001243766;NM_001290129;NM_017739	Body;Body;Body;Body						0.644992	0.902191	0.257199
cg06212760	37	1	46664937	POMGNT1;POMGNT1	NR_024332;NM_017739	Body;TSS1500	chr1:46668821-46669258	N_Shelf			TRUE	0.514732	0.825531	0.310798
cg19856273	37	1	46668472	C1orf190;POMGNT1	NM_001013615;NR_024332	TSS1500;Body	chr1:46668821-46669258	N_Shore			TRUE	0.298923	0.681663	0.38274
cg22509164	37	1	46766957	LRRC41	NM_006369	Body	chr1:46767425-46769036	N_Shore			TRUE	0.1726	0.424227	0.251627
cg14683528	37	1	46805340	NSUN4;NSUN4;NSUN4;NSUN4	NM_199044;NR_045791;NR_045789;NR_045790	TSS1500;TSS1500;TSS1500;TSS1500	chr1:46806339-46806836	N_Shore				0.415419	0.675467	0.260048
cg17806798	37	1	46807113	NSUN4	NM_199044	Body	chr1:46806339-46806836	S_Shore			TRUE	0.262104	0.552171	0.290067
cg06911238	37	1	46859671	FAAH	NM_001441	TSS1500	chr1:46859724-46860291	N_Shore			TRUE	0.212388	0.590325	0.377937
cg12671744	37	1	46859774	FAAH	NM_001441	TSS200	chr1:46859724-46860291	Island			TRUE	0.124768	0.409375	0.284607
cg16267850	37	1	46859791	FAAH	NM_001441	TSS200	chr1:46859724-46860291	Island			TRUE	0.124375	0.378008	0.253633
cg07168328	37	1	46871232	FAAH	NM_001441	Body					TRUE	0.355407	0.693588	0.338182
cg12137357	37	1	46989771									0.27053	0.833674	0.563145
cg23038338	37	1	46996546				chr1:46998632-46999249	N_Shelf			TRUE	0.303906	0.632136	0.32823
cg12812068	37	1	47016114	KNCN	NM_001097611	Body					TRUE	0.357542	0.65371	0.296168
cg19987219	37	1	47016749	KNCN	NM_001097611	1stExon					TRUE	0.397631	0.805504	0.407873
cg17946439	37	1	47077680	MOBKL2C;MOBKL2C	NM_145279;NM_201403	Body;Body	chr1:47078580-47078967	N_Shore			TRUE	0.336447	0.721422	0.384975
cg18690385	37	1	47078966	MOBKL2C;MOBKL2C	NM_145279;NM_201403	Body;Body	chr1:47078580-47078967	Island			TRUE	0.508604	0.861054	0.35245
cg20039909	37	1	47132520	ATPAF1;ATPAF1;ATPAF1;ATPAF1	NM_001243728;NM_001256418;NM_022745;NM_001042546	TSS1500;TSS1500;Body;Body	chr1:47133674-47134395	N_Shore				0.434237	0.755175	0.320938
cg08972604	37	1	47132647	ATPAF1;ATPAF1;ATPAF1;ATPAF1	NM_001243728;NM_001256418;NM_022745;NM_001042546	TSS1500;TSS1500;Body;Body	chr1:47133674-47134395	N_Shore				0.301186	0.558954	0.257767
cg15263181	37	1	47132880	ATPAF1;ATPAF1;ATPAF1;ATPAF1	NM_001243728;NM_001256418;NM_022745;NM_001042546	TSS1500;TSS1500;Body;Body	chr1:47133674-47134395	N_Shore				0.41404	0.725629	0.311589
cg17975941	37	1	47215835									0.254135	0.635531	0.381396
cg14622152	37	1	47222932									0.41268	0.681542	0.268862
cg01674000	37	1	47223568									0.324991	0.6322	0.307208
cg26372956	37	1	47234588									0.579332	0.842008	0.262677
cg13781819	37	1	47469065								TRUE	0.539864	0.857672	0.317809
cg25858825	37	1	47645929	LINC00853	NR_047498	Body						0.38964	0.688668	0.299027
cg23649500	37	1	47689769	TAL1;TAL1;TAL1;TAL1;TAL1;TAL1;TAL1;TAL1;TAL1;TAL1;TAL1;TAL1	NM_001287347;NM_001290405;NM_001290404;NM_001290403;NM_003189;NM_001290406;NM_001287347;NM_001290405;NM_001290404;NM_001290403;NM_003189;NM_001290406	Body;Body;Body;Body;Body;ExonBnd;ExonBnd;ExonBnd;ExonBnd;ExonBnd;ExonBnd;5'UTR	chr1:47690980-47691727	N_Shore				0.231645	0.539669	0.308023
cg13789639	37	1	47746081	STIL;STIL;STIL;STIL;STIL;STIL	NM_001282939;NM_001282938;NM_001282936;NM_001048166;NM_003035;NM_001282937	Body;Body;Body;Body;Body;Body						0.486349	0.827946	0.341596
cg07707479	37	1	47879840				chr1:47881896-47883065	N_Shelf			TRUE	0.355089	0.671934	0.316845
cg05658236	37	1	47898911	MGC12982	NR_026878	Body	chr1:47899125-47899398	N_Shore			TRUE	0.395009	0.720415	0.325406
cg18595867	37	1	47899212	MGC12982	NR_026878	Body	chr1:47899125-47899398	Island			TRUE	0.302656	0.562322	0.259666
cg13851904	37	1	47899230	MGC12982	NR_026878	Body	chr1:47899125-47899398	Island			TRUE	0.311828	0.566097	0.254269
cg22438763	37	1	47900256	FOXD2;MGC12982	NM_004474;NR_026878	TSS1500;Body	chr1:47899661-47900385	Island			TRUE	0.0899391	0.386593	0.296654
cg08638320	37	1	47900265	FOXD2;MGC12982	NM_004474;NR_026878	TSS1500;Body	chr1:47899661-47900385	Island			TRUE	0.188546	0.490347	0.301801
cg15868302	37	1	47900327	FOXD2;FOXD2-AS1;LINC01389	NM_004474;NR_026878;NR_126355	TSS1500;TSS200;Body	chr1:47899661-47900385	Island				0.14912	0.477329	0.328208
cg18967587	37	1	48229020								TRUE	0.440462	0.864642	0.42418
cg20953332	37	1	48276240	TRABD2B	NM_001194986	Body						0.392567	0.752139	0.359572
cg17694101	37	1	48288894	TRABD2B	NM_001194986	Body						0.266873	0.571347	0.304474
cg00675964	37	1	48289867	TRABD2B	NM_001194986	Body						0.396388	0.684627	0.288239
cg16401668	37	1	48296905								TRUE	0.55509	0.82695	0.27186
cg06599697	37	1	48379853	TRABD2B	NM_001194986	Body						0.581058	0.909238	0.328179
cg04588423	37	1	48380059	TRABD2B	NM_001194986	Body						0.458049	0.856498	0.39845
cg27579122	37	1	48383520	TRABD2B	NM_001194986	Body						0.537267	0.924527	0.387261
cg11271970	37	1	48383526	TRABD2B	NM_001194986	Body						0.525325	0.89695	0.371625
cg18154417	37	1	48400073								TRUE	0.285015	0.562373	0.277358
cg06724078	37	1	48429551								TRUE	0.224377	0.494419	0.270041
cg03810376	37	1	48460892				chr1:48462131-48462976	N_Shore			TRUE	0.458219	0.767488	0.309269
cg20596765	37	1	48484386									0.406138	0.699486	0.293348
cg22848704	37	1	48648439	SKINTL	NR_026749	TSS1500					TRUE	0.445988	0.865062	0.419074
cg15009232	37	1	49085506	AGBL4	NM_032785	Body					TRUE	0.43758	0.709372	0.271791
cg07346604	37	1	49335202	AGBL4	NM_032785	Body						0.255964	0.558176	0.302212
cg08278167	37	1	50641617	ELAVL4;ELAVL4;ELAVL4;ELAVL4;ELAVL4;ELAVL4	NM_001144777;NM_001144776;NM_001144775;NM_021952;NM_001144774;NM_001294348	Body;Body;Body;Body;Body;Body						0.205198	0.479596	0.274398
cg18012138	37	1	50823751									0.385266	0.728497	0.343231
cg22715854	37	1	51076317	FAF1	NM_007051	Body						0.474008	0.737589	0.26358
cg01147538	37	1	51171852	FAF1	NM_007051	Body						0.53797	0.876883	0.338913
cg00908631	37	1	51433616	CDKN2C	NM_001262	TSS1500	chr1:51433762-51435505	N_Shore			TRUE	0.295114	0.549157	0.254043
cg05773746	37	1	51684908									0.443643	0.838932	0.395289
cg05961586	37	1	51727193	RNF11	NM_014372	Body						0.302959	0.604143	0.301184
cg10167562	37	1	51795193	TTC39A-AS1;TTC39A;TTC39A;TTC39A;TTC39A	NR_123731;NM_001297664;NM_001297663;NM_001144832;NM_001297662	TSS200;5'UTR;Body;Body;Body	chr1:51796097-51796589	N_Shore				0.219032	0.747768	0.528736
cg21715339	37	1	51795237	TTC39A-AS1;TTC39A;TTC39A;TTC39A;TTC39A	NR_123731;NM_001297664;NM_001297663;NM_001144832;NM_001297662	TSS200;5'UTR;Body;Body;Body	chr1:51796097-51796589	N_Shore				0.349375	0.751254	0.401879
cg24713996	37	1	51795340	TTC39A-AS1;TTC39A;TTC39A;TTC39A;TTC39A	NR_123731;NM_001297664;NM_001297663;NM_001144832;NM_001297662	Body;5'UTR;Body;Body;Body	chr1:51796097-51796589	N_Shore				0.289372	0.671073	0.381701
cg06061240	37	1	51800535	TTC39A	NM_001144832	Body	chr1:51796097-51796589	S_Shelf			TRUE	0.46033	0.765493	0.305164
cg02964349	37	1	52035928									0.429761	0.763237	0.333477
cg23370721	37	1	52094876	OSBPL9;OSBPL9;OSBPL9;OSBPL9;OSBPL9	NR_036662;NM_148909;NM_148908;NM_148906;NM_024586	Body;Body;Body;Body;Body						0.549541	0.87707	0.327529
cg17951244	37	1	52158161	OSBPL9;OSBPL9;OSBPL9;OSBPL9	NM_148908;NM_148906;NM_024586;NM_148909	Body;5'UTR;Body;Body					TRUE	0.327686	0.691382	0.363696
cg20858200	37	1	52316767	NRD1;NRD1;NRD1	NM_001242361;NM_001101662;NM_002525	5'UTR;Body;Body						0.163862	0.450096	0.286234
cg15167686	37	1	52523330	BTF3L4;BTF3L4;TXNDC12;TXNDC12;TXNDC12;BTF3L4	NM_152265;NM_001243767;NM_015913;NR_046406;NR_046405;NM_001136497	5'UTR;5'UTR;TSS1500;TSS1500;TSS1500;5'UTR	chr1:52521780-52522296	S_Shore				0.438218	0.848249	0.410031
cg00187465	37	1	52830898	CC2D1B	NM_032449	5'UTR	chr1:52831511-52832181	N_Shore			TRUE	0.322684	0.592344	0.26966
cg16544429	37	1	52834873				chr1:52834139-52834528	S_Shore				0.289747	0.682373	0.392625
cg04682580	37	1	53016396	ZCCHC11;ZCCHC11;ZCCHC11	NM_001009881;NM_001009882;NM_015269	5'UTR;5'UTR;5'UTR	chr1:53018258-53019599	N_Shore			TRUE	0.537762	0.822019	0.284257
cg08602683	37	1	53020695				chr1:53018258-53019599	S_Shore		chr1:53020482-53020482		0.291161	0.565721	0.27456
cg04729026	37	1	53097317				chr1:53098629-53099303	N_Shore				0.537301	0.818688	0.281387
cg01887689	37	1	53128627									0.220434	0.52407	0.303636
cg01357124	37	1	53131589									0.537424	0.794664	0.25724
cg26475539	37	1	53134648									0.475941	0.732097	0.256156
cg00686366	37	1	53346487	ZYG11A;ZYG11A	NM_001004339;NM_001307931	Body;Body						0.355689	0.65871	0.303021
cg20287790	37	1	53359982	ZYG11A	NM_001004339	3'UTR					TRUE	0.384193	0.854987	0.470794
cg06600287	37	1	53387719	ECHDC2	NM_018281	TSS1500	chr1:53386617-53387523	S_Shore			TRUE	0.336955	0.60491	0.267955
cg06360841	37	1	53405671	MIR1273G;SCP2;SCP2;SCP2;SCP2;SCP2	NR_039972;NM_001193617;NM_001007098;NM_001193600;NM_001193599;NM_002979	TSS1500;5'UTR;Body;Body;Body;Body						0.366716	0.740185	0.373469
cg10438560	37	1	53642234								TRUE	0.624456	0.896674	0.272219
cg06525453	37	1	53661448	CPT2	NM_000098	TSS1500	chr1:53662309-53662815	N_Shore			TRUE	0.137296	0.445078	0.307783
cg00228689	37	1	53742112	LRP8;LRP8;LRP8;LRP8	NM_033300;NM_001018054;NM_017522;NM_004631	Body;Body;Body;Body	chr1:53742297-53742845	N_Shore			TRUE	0.57543	0.892352	0.316922
cg22819171	37	1	53742252	LRP8;LRP8;LRP8;LRP8	NM_033300;NM_001018054;NM_017522;NM_004631	Body;Body;Body;Body	chr1:53742297-53742845	N_Shore			TRUE	0.384721	0.73356	0.348839
cg03366858	37	1	53742322	LRP8;LRP8;LRP8;LRP8	NM_033300;NM_001018054;NM_017522;NM_004631	Body;Body;Body;Body	chr1:53742297-53742845	Island			TRUE	0.564499	0.880133	0.315634
cg09823841	37	1	53771839	LRP8;LRP8;LRP8;LRP8	NM_033300;NM_004631;NM_017522;NM_001018054	Body;Body;Body;Body						0.525382	0.881037	0.355655
cg04162383	37	1	53973673	GLIS1	NM_147193	Body					TRUE	0.627417	0.928909	0.301492
cg08711113	37	1	53973727	GLIS1	NM_147193	Body					TRUE	0.478353	0.729405	0.251052
cg23174919	37	1	53977855	GLIS1	NM_147193	Body					TRUE	0.497886	0.782128	0.284242
cg14275316	37	1	53987931	GLIS1	NM_147193	Body						0.262825	0.528599	0.265774
cg06793277	37	1	54038548	GLIS1	NM_147193	Body					TRUE	0.372597	0.848279	0.475682
cg16254946	37	1	54058616	GLIS1	NM_147193	Body					TRUE	0.291318	0.602297	0.310979
cg24845466	37	1	54082767	GLIS1	NM_147193	5'UTR						0.526142	0.879584	0.353442
cg23596471	37	1	54105337	GLIS1	NM_147193	5'UTR					TRUE	0.390955	0.710529	0.319574
cg08446194	37	1	54124735	GLIS1	NM_147193	5'UTR						0.448337	0.829982	0.381645
cg23019565	37	1	54144343	GLIS1	NM_147193	5'UTR					TRUE	0.2365	0.524161	0.287661
cg05154856	37	1	54205843				chr1:54203402-54205310	S_Shore			TRUE	0.493711	0.771647	0.277936
cg25873615	37	1	54356260	YIPF1;YIPF1;YIPF1	NM_018982;NR_036640;NR_036639	TSS1500;TSS1500;TSS1500	chr1:54355354-54355656	S_Shore				0.258464	0.599765	0.341301
cg05886281	37	1	54379551									0.585493	0.870087	0.284594
cg20460166	37	1	54423202	LRRC42	NM_052940	Body					TRUE	0.23219	0.519988	0.287798
cg26185508	37	1	54619445	CDCP2	NM_201546	TSS200					TRUE	0.147797	0.448212	0.300415
cg14146815	37	1	54619564	CDCP2	NM_201546	TSS1500						0.148405	0.461366	0.312961
cg10965749	37	1	54619895	CDCP2	NM_201546	TSS1500					TRUE	0.213204	0.490747	0.277543
cg25419511	37	1	54623623									0.406213	0.824157	0.417945
cg18909912	37	1	54747883	SSBP3;SSBP3;SSBP3	NM_018070;NM_001009955;NM_145716	Body;Body;Body						0.562278	0.893209	0.330931
cg13032555	37	1	54764654	SSBP3;SSBP3;SSBP3	NM_018070;NM_001009955;NM_145716	Body;Body;Body						0.35454	0.698241	0.343701
cg24965200	37	1	54771989	SSBP3;SSBP3;SSBP3	NM_018070;NM_001009955;NM_145716	Body;Body;Body						0.399748	0.747998	0.34825
cg15393022	37	1	54775837	SSBP3;SSBP3;SSBP3	NM_001009955;NM_018070;NM_145716	Body;Body;Body					TRUE	0.450015	0.73873	0.288715
cg01817397	37	1	54789771	SSBP3;SSBP3;SSBP3	NM_018070;NM_001009955;NM_145716	Body;Body;Body						0.306823	0.810257	0.503434
cg10700384	37	1	54836620	SSBP3;SSBP3;SSBP3	NM_018070;NM_001009955;NM_145716	Body;Body;Body						0.416529	0.928673	0.512145
cg15979145	37	1	54862813	SSBP3;SSBP3;SSBP3	NM_018070;NM_001009955;NM_145716	Body;Body;Body						0.285909	0.624792	0.338883
cg00018783	37	1	54868743	SSBP3;SSBP3;SSBP3	NM_018070;NM_001009955;NM_145716	Body;Body;Body	chr1:54870853-54872476	N_Shelf		chr1:54868582-54868582		0.596059	0.846116	0.250057
cg00988037	37	1	54869007	SSBP3;SSBP3;SSBP3	NM_001009955;NM_018070;NM_145716	Body;Body;Body	chr1:54870853-54872476	N_Shore			TRUE	0.334858	0.629582	0.294724
cg04561731	37	1	54869371	SSBP3;SSBP3;SSBP3	NM_001009955;NM_018070;NM_145716	Body;Body;Body	chr1:54870853-54872476	N_Shore			TRUE	0.383619	0.640577	0.256959
cg08882329	37	1	54887098									0.294801	0.580817	0.286016
cg02997874	37	1	54950146				chr1:54953893-54955287	N_Shelf			TRUE	0.392002	0.791667	0.399665
cg12794131	37	1	55024844	ACOT11;ACOT11	NM_015547;NM_147161	Body;Body					TRUE	0.60674	0.92953	0.32279
cg14461099	37	1	55030151	ACOT11;ACOT11	NM_147161;NM_015547	Body;Body						0.331361	0.609608	0.278247
cg15796595	37	1	55069723	ACOT11;ACOT11	NM_147161;NM_015547	Body;Body						0.430058	0.864607	0.434549
cg26741990	37	1	55069761	ACOT11;ACOT11	NM_147161;NM_015547	Body;Body						0.363208	0.751707	0.388499
cg13312804	37	1	55089484	FAM151A;ACOT11	NM_176782;NM_015547	TSS1500;Body						0.205111	0.493779	0.288667
cg17242490	37	1	55106721	C1orf175;C1orf175	NM_001039464;NR_026782	TSS1500;TSS1500					TRUE	0.341703	0.727412	0.38571
cg25584313	37	1	55106984	MROH7;MROH7;MROH7;MROH7;MROH7-TTC4;MROH7-TTC4;MROH7-TTC4	NM_001039464;NM_001291332;NR_111931;NR_026782;NR_037641;NR_037639;NR_037640	TSS1500;TSS1500;TSS1500;TSS1500;TSS1500;TSS1500;TSS1500						0.243666	0.558849	0.315183
cg13428567	37	1	55107132	C1orf175;C1orf175	NM_001039464;NR_026782	TSS1500;TSS1500					TRUE	0.26037	0.65362	0.39325
cg03983498	37	1	55107291	C1orf175;C1orf175	NM_001039464;NR_026782	TSS200;TSS200					TRUE	0.491444	0.754616	0.263172
cg07344582	37	1	55211119									0.331861	0.681605	0.349744
cg15645660	37	1	55247356	TTC22	NM_001114108	Body	chr1:55246742-55247519	Island			TRUE	0.340275	0.601174	0.260899
cg11949335	37	1	55247408	TTC22	NM_001114108	Body	chr1:55246742-55247519	Island			TRUE	0.340848	0.704665	0.363817
cg21872908	37	1	55271673	C1orf177;C1orf177	NM_152607;NM_001110533	TSS200;TSS200	chr1:55271665-55271972	Island			TRUE	0.326224	0.594972	0.268748
cg01398941	37	1	55271902	C1orf177;C1orf177	NM_152607;NM_001110533	Body;Body	chr1:55271665-55271972	Island			TRUE	0.492894	0.74694	0.254046
cg03557698	37	1	55271921	C1orf177;C1orf177	NM_152607;NM_001110533	Body;Body	chr1:55271665-55271972	Island			TRUE	0.523619	0.816368	0.292749
cg18686815	37	1	55285186	C1orf177;C1orf177	NM_152607;NM_001110533	Body;Body						0.503809	0.904129	0.400321
cg17475467	37	1	55316769	DHCR24	NM_014762	3'UTR					TRUE	0.379417	0.648206	0.268789
cg07731939	37	1	55320320	DHCR24	NM_014762	Body						0.356796	0.679055	0.322259
cg25098793	37	1	55332551	DHCR24	NM_014762	Body					TRUE	0.505383	0.89494	0.389557
cg11552768	37	1	55334868	DHCR24	NM_014762	Body						0.55233	0.874788	0.322459
cg20291423	37	1	55350823	DHCR24	NM_014762	Body	chr1:55352463-55353328	N_Shore			TRUE	0.366384	0.802407	0.436023
cg24206199	37	1	55351384	DHCR24	NM_014762	Body	chr1:55352463-55353328	N_Shore				0.396069	0.888708	0.492639
cg27168858	37	1	55351659	DHCR24	NM_014762	Body	chr1:55352463-55353328	N_Shore			TRUE	0.359724	0.802899	0.443175
cg17901584	37	1	55353706	DHCR24	NM_014762	TSS1500	chr1:55352463-55353328	S_Shore			TRUE	0.197437	0.47407	0.276632
cg14372770	37	1	55530865									0.190022	0.5086	0.318578
cg16245868	37	1	55547090	USP24	NM_015306	Body					TRUE	0.530831	0.844997	0.314167
cg16060302	37	1	55741012									0.236139	0.653083	0.416944
cg25664843	37	1	55751723									0.414602	0.840463	0.425861
cg13115910	37	1	55840880									0.5633	0.814246	0.250947
cg03899869	37	1	55865162									0.441658	0.701153	0.259495
cg17738879	37	1	55932610									0.475241	0.745411	0.27017
cg03598074	37	1	56124437								TRUE	0.482442	0.739775	0.257332
cg22358621	37	1	56160224									0.287171	0.552749	0.265578
cg03459415	37	1	56343697								TRUE	0.414562	0.698313	0.283751
cg12466592	37	1	56409851									0.441111	0.779472	0.338361
cg13733048	37	1	56410008									0.374697	0.714006	0.339308
cg06929120	37	1	56530823									0.419185	0.848442	0.429257
cg13295911	37	1	57246652	C1orf168	NM_001004303	Body						0.350612	0.608745	0.258133
cg16347256	37	1	57285160	C1orf168;C1orf168	NM_001004303;NM_001004303	1stExon;5'UTR					TRUE	0.430729	0.747095	0.316367
cg06714173	37	1	57320557	C8A;C8A	NM_000562;NM_000562	5'UTR;1stExon						0.435426	0.817769	0.382344
cg16648841	37	1	57320685	C8A	NM_000562	Body					TRUE	0.280659	0.561302	0.280644
cg10284493	37	1	57429519	C8B;C8B;C8B	NM_001278544;NM_001278543;NM_000066	5'UTR;5'UTR;Body						0.433561	0.727669	0.294108
cg25268621	37	1	58056824	DAB1	NM_021080	5'UTR						0.452359	0.872815	0.420456
cg10029004	37	1	58672744	DAB1	NM_021080	5'UTR						0.606537	0.876483	0.269946
cg07939591	37	1	59013529	OMA1	NM_145243	TSS1500	chr1:59012326-59012577	S_Shore				0.608152	0.935886	0.327733
cg01747796	37	1	59040648				chr1:59042013-59043295	N_Shore			TRUE	0.372103	0.780929	0.408826
cg21536783	37	1	59041407	TACSTD2;TACSTD2	NM_002353;NM_002353	3'UTR;1stExon	chr1:59042013-59043295	N_Shore			TRUE	0.2916	0.627512	0.335912
cg13443627	37	1	59043070	TACSTD2;TACSTD2	NM_002353;NM_002353	5'UTR;1stExon	chr1:59042013-59043295	Island			TRUE	0.15337	0.425948	0.272578
cg16080552	37	1	59043199	TACSTD2	NM_002353	TSS200	chr1:59042013-59043295	Island			TRUE	0.101972	0.353419	0.251447
cg04863005	37	1	59043208	TACSTD2	NM_002353	TSS200	chr1:59042013-59043295	Island			TRUE	0.0968865	0.385253	0.288366
cg07176168	37	1	59085716								TRUE	0.618206	0.873721	0.255514
cg11329371	37	1	59186580									0.317411	0.653075	0.335664
cg17682952	37	1	59187202									0.418901	0.687637	0.268736
cg11137178	37	1	59198271									0.392653	0.91461	0.521956
cg23492218	37	1	59198555									0.479681	0.762221	0.28254
cg26636662	37	1	59204565									0.452359	0.735006	0.282647
cg14318145	37	1	59215253									0.511647	0.801295	0.289648
cg01556275	37	1	59245597				chr1:59247461-59250940	N_Shore			TRUE	0.164671	0.479297	0.314626
cg10983873	37	1	59275055	LINC01135;LINC01135;LINC01135	NR_034015;NR_034014;NR_108106	Body;Body;Body						0.30964	0.634383	0.324743
cg17826530	37	1	59280290				chr1:59280240-59280490	Island			TRUE	0.409677	0.680514	0.270837
cg06315280	37	1	59290839	LINC01135;LINC01135;LINC01135	NR_034015;NR_034014;NR_108106	Body;Body;Body						0.295567	0.585941	0.290374
cg17898762	37	1	59387108									0.583472	0.894074	0.310602
cg26558625	37	1	59397699							chr1:59397559-59397559		0.330447	0.59368	0.263233
cg15393941	37	1	59408670									0.330873	0.590459	0.259586
cg08461876	37	1	59437584									0.353839	0.641897	0.288058
cg11445178	37	1	59441766									0.339228	0.636128	0.2969
cg02309613	37	1	59484600									0.549762	0.921797	0.372035
cg03352242	37	1	59484797	LINC01358	NR_110626	TSS1500						0.672181	0.941989	0.269807
cg05108292	37	1	59484803	LINC01358	NR_110626	TSS1500						0.458235	0.863393	0.405158
cg03581611	37	1	59517841	LINC01358	NR_110626	Body						0.586046	0.941325	0.355279
cg09225792	37	1	59522144	LINC01358	NR_110626	Body						0.26966	0.59871	0.32905
cg02804609	37	1	59523557	LINC01358	NR_110626	Body						0.419823	0.777393	0.35757
cg18581916	37	1	59543930	LINC01358	NR_110626	Body						0.419107	0.749167	0.33006
cg18604584	37	1	59545056	LINC01358	NR_110626	Body						0.384387	0.87249	0.488103
cg18231025	37	1	59573471								TRUE	0.354111	0.8491	0.494989
cg19218470	37	1	59573855									0.302393	0.567942	0.265549
cg09013245	37	1	59649683									0.488517	0.870171	0.381654
cg13108577	37	1	59664182									0.329038	0.698311	0.369273
cg07623083	37	1	59742152									0.258517	0.583968	0.325451
cg26196860	37	1	59745563								TRUE	0.385183	0.737007	0.351824
cg04712279	37	1	59774250	FGGY;FGGY;FGGY;FGGY	NM_001244714;NM_018291;NM_001113411;NR_103473	TSS1500;5'UTR;5'UTR;Body						0.564755	0.874457	0.309702
cg12711508	37	1	59820939	FGGY;FGGY;FGGY;FGGY	NM_018291;NM_001244714;NM_001113411;NR_103473	Body;Body;Body;Body						0.3799	0.638276	0.258375
cg12459184	37	1	59825904	FGGY;FGGY;FGGY;FGGY	NM_018291;NM_001244714;NM_001113411;NR_103473	Body;Body;Body;Body						0.448931	0.830966	0.382034
cg06532539	37	1	59825928	FGGY;FGGY;FGGY;FGGY	NM_018291;NM_001244714;NM_001113411;NR_103473	Body;Body;Body;Body						0.393886	0.771162	0.377276
cg15910205	37	1	59859015	FGGY;FGGY;FGGY;FGGY	NM_018291;NM_001244714;NM_001113411;NR_103473	Body;Body;Body;Body						0.244402	0.495252	0.25085
cg07489891	37	1	59889088	FGGY;FGGY;FGGY;FGGY	NM_018291;NM_001244714;NM_001113411;NR_103473	Body;Body;Body;Body						0.32831	0.684833	0.356524
cg15594444	37	1	59893192	FGGY;FGGY	NM_018291;NM_001113411	Body;Body					TRUE	0.346003	0.78612	0.440117
cg06167025	37	1	59912109	FGGY;FGGY;FGGY;FGGY	NM_018291;NM_001244714;NM_001113411;NR_103473	Body;Body;Body;Body						0.428865	0.711417	0.282553
cg11157185	37	1	59966003	FGGY;FGGY	NM_018291;NM_001113411	Body;Body					TRUE	0.573789	0.832477	0.258688
cg04130508	37	1	60060109	FGGY;FGGY;FGGY;FGGY;FGGY	NM_018291;NM_001244714;NM_001113411;NM_001278224;NR_103473	Body;Body;Body;Body;Body						0.671487	0.923625	0.252138
cg08079203	37	1	60062475	FGGY;FGGY;FGGY;FGGY;FGGY	NM_018291;NM_001244714;NM_001113411;NM_001278224;NR_103473	Body;Body;Body;Body;Body						0.43622	0.778936	0.342716
cg19453566	37	1	60125751	FGGY;FGGY;FGGY;FGGY;FGGY	NM_018291;NM_001244714;NM_001113411;NM_001278224;NR_103473	Body;Body;Body;Body;Body						0.654855	0.924516	0.269661
cg10051022	37	1	60139347	FGGY;FGGY;FGGY;FGGY;FGGY	NM_018291;NM_001244714;NM_001113411;NM_001278224;NR_103473	Body;Body;Body;Body;Body						0.376783	0.837193	0.46041
cg09970021	37	1	60140663	FGGY;FGGY;FGGY;FGGY;FGGY	NM_018291;NM_001244714;NM_001113411;NM_001278224;NR_103473	Body;Body;Body;Body;Body						0.538812	0.868307	0.329495
cg14192402	37	1	60217612	FGGY;FGGY;FGGY;FGGY	NM_018291;NM_001244714;NM_001113411;NM_001278224	Body;Body;Body;Body						0.458386	0.775076	0.31669
cg02915259	37	1	60224185	FGGY;FGGY	NM_018291;NM_001113411	Body;Body					TRUE	0.595652	0.891625	0.295973
cg16379336	37	1	60233376									0.599569	0.857563	0.257995
cg07767776	37	1	60234619									0.359224	0.882871	0.523647
cg18338027	37	1	60282150	HOOK1	NM_015888	Body	chr1:60280624-60281048	S_Shore				0.223216	0.535404	0.312188
cg27071436	37	1	60297257	HOOK1	NM_015888	Body						0.497234	0.80811	0.310875
cg22460281	37	1	60746742									0.485853	0.828519	0.342666
cg19126690	37	1	61390978									0.491685	0.908062	0.416377
cg03859194	37	1	61391186									0.317457	0.579716	0.26226
cg07381872	37	1	61408076								TRUE	0.343776	0.60365	0.259875
cg26520684	37	1	61418534	NFIA-AS2	NR_110617	Body						0.543023	0.821471	0.278448
cg25369553	37	1	61522373				chr1:61519352-61519971	S_Shelf			TRUE	0.207815	0.505248	0.297433
cg07328569	37	1	61524438									0.498822	0.880076	0.381254
cg21414842	37	1	61545075	NFIA	NM_001145511	Body	chr1:61548753-61549564	N_Shelf			TRUE	0.52049	0.852734	0.332244
cg02846651	37	1	61546179	NFIA;NFIA	NM_001145512;NM_001145511	TSS1500;Body	chr1:61548753-61549564	N_Shelf				0.134142	0.450167	0.316025
cg14093103	37	1	61546214	NFIA;NFIA	NM_001145511;NM_001145512	Body;TSS1500	chr1:61548753-61549564	N_Shelf			TRUE	0.230518	0.590061	0.359542
[truncated: 38,160 more rows]

## Sheet: Hypo 0.25 nodule
IlmnID	Genome_Build	CHR	MAPINFO	UCSC_RefGene_Name	UCSC_RefGene_Accession	UCSC_RefGene_Group	UCSC_CpG_Islands_Name	Relation_to_UCSC_CpG_Island	Phantom4_Enhancers	Phantom5_Enhancers	Methyl450_Loci	Cont. Mean	KS Mean	KS Minus Cont.
cg21288685	37	1	1109244	TTLL10	NM_001130045	TSS200	chr1:1109314-1110145	N_Shore			TRUE	0.408569	0.0905505	-0.318018
cg10143960	37	1	1109486	TTLL10	NM_001130045	5'UTR	chr1:1109314-1110145	Island			TRUE	0.609164	0.355081	-0.254083
cg16366262	37	1	1118157	TTLL10;TTLL10	NM_153254;NM_001130045	Body;Body	chr1:1115574-1116006	S_Shelf			TRUE	0.694647	0.380163	-0.314484
cg16266669	37	1	1144558				chr1:1145568-1145878	N_Shore			TRUE	0.638262	0.372499	-0.265763
cg14531564	37	1	1154853	SDF4;SDF4	NM_016176;NM_016547	Body;Body	chr1:1152522-1153134	S_Shore			TRUE	0.834794	0.583917	-0.250878
cg12655137	37	1	1609388	CDK11B;CDK11B;CDK11B;CDK11B;CDK11B;LOC728661;CDK11B	NM_033493;NM_033489;NM_033486;NM_033488;NM_033492;NM_001110781;NM_033487	Body;Body;Body;Body;Body;5'UTR;5'UTR	chr1:1607898-1608243	S_Shore			TRUE	0.811887	0.515065	-0.296822
cg14915244	37	1	2080213	PRKCZ;PRKCZ;PRKCZ;PRKCZ	NM_002744;NM_001242874;NM_001033581;NM_001033582	Body;Body;Body;Body	chr1:2082314-2082529	N_Shelf				0.669399	0.4141	-0.255298
cg16315417	37	1	2187457	SKI	NM_003036	Body					TRUE	0.570031	0.166268	-0.403763
cg11514097	37	1	2187762	SKI	NM_003036	Body						0.793832	0.335381	-0.458451
cg08271229	37	1	2222674	SKI	NM_003036	Body	chr1:2222198-2222569	S_Shore			TRUE	0.398179	0.130267	-0.267912
cg01852476	37	1	2232063	SKI	NM_003036	Body	chr1:2232310-2232617	N_Shore		chr1:2231691-2231691	TRUE	0.75716	0.47734	-0.27982
cg26017930	37	1	2232166	SKI	NM_003036	Body	chr1:2232310-2232617	N_Shore		chr1:2231691-2231691	TRUE	0.70912	0.439832	-0.269288
cg08703055	37	1	2232481	SKI	NM_003036	Body	chr1:2232310-2232617	Island		chr1:2232428-2232428	TRUE	0.51583	0.238223	-0.277607
cg23015118	37	1	2232527	SKI	NM_003036	Body	chr1:2232310-2232617	Island		chr1:2232428-2232428	TRUE	0.547296	0.240494	-0.306801
cg09938406	37	1	2890369				chr1:2886589-2886923	S_Shelf			TRUE	0.38944	0.118014	-0.271425
cg13009839	37	1	3088978	PRDM16;PRDM16	NM_199454;NM_022114	Body;Body						0.864609	0.59774	-0.266869
cg14767338	37	1	3300807	PRDM16;PRDM16	NM_199454;NM_022114	Body;Body						0.726216	0.420327	-0.305889
cg17691102	37	1	3407829	MEGF6	NM_001409	Body						0.45378	0.170313	-0.283468
cg20306863	37	1	3593812	TP73	NM_005427	5'UTR					TRUE	0.771727	0.481358	-0.290369
cg14494450	37	1	4190881				chr1:4192633-4193243	N_Shore				0.857023	0.529996	-0.327028
cg04094178	37	1	4195569				chr1:4192633-4193243	S_Shelf			TRUE	0.832049	0.551531	-0.280518
cg03394794	37	1	5556280									0.610611	0.342998	-0.267613
cg04902968	37	1	5771047				chr1:5772056-5772513	N_Shore			TRUE	0.785958	0.526118	-0.25984
cg24005842	37	1	5777831								TRUE	0.505784	0.187474	-0.31831
cg00702417	37	1	6054867				chr1:6051595-6052955	S_Shore			TRUE	0.834204	0.504515	-0.329689
cg03726628	37	1	6088407	KCNAB2;KCNAB2;KCNAB2	NM_001199861;NM_003636;NM_172130	5'UTR;5'UTR;5'UTR	chr1:6086244-6086494	S_Shore		chr1:6088225-6088225		0.782856	0.523443	-0.259413
cg11185792	37	1	6097703	KCNAB2;KCNAB2	NM_003636;NM_172130	5'UTR;5'UTR					TRUE	0.398759	0.121411	-0.277348
cg16681526	37	1	6526469	TNFRSF25;PLEKHG5;TNFRSF25;PLEKHG5;PLEKHG5;TNFRSF25;PLEKHG5;TNFRSF25;TNFRSF25;PLEKHG5;TNFRSF25	NM_148966;NM_001042663;NM_148965;NM_001042665;NM_001042664;NM_003790;NM_198681;NM_148970;NM_001039664;NM_020631;NM_148967	TSS1500;3'UTR;TSS1500;3'UTR;3'UTR;TSS1500;3'UTR;TSS1500;TSS1500;3'UTR;TSS1500	chr1:6525996-6526228	S_Shore			TRUE	0.856694	0.581535	-0.275159
cg12661316	37	1	7029235	CAMTA1	NM_015215	Body					TRUE	0.807811	0.506964	-0.300847
cg04943374	37	1	7075618	CAMTA1	NM_015215	Body						0.424853	0.173028	-0.251825
cg24579970	37	1	7123315	CAMTA1	NM_015215	Body	chr1:7122519-7122727	S_Shore			TRUE	0.855788	0.56808	-0.287708
cg20087386	37	1	7168403	CAMTA1	NM_015215	Body						0.845581	0.558312	-0.287269
cg18504143	37	1	7219603	CAMTA1	NM_015215	Body						0.722461	0.447941	-0.27452
cg17079374	37	1	7308012	CAMTA1	NM_015215	Body					TRUE	0.700108	0.391124	-0.308984
cg12710648	37	1	7308091	CAMTA1	NM_015215	Body					TRUE	0.715451	0.427835	-0.287616
cg20947849	37	1	7514232	CAMTA1	NM_015215	Body					TRUE	0.604204	0.233866	-0.370338
cg17605629	37	1	7625636	CAMTA1	NM_015215	Body						0.811942	0.559968	-0.251974
cg16380632	37	1	7637516	CAMTA1	NM_015215	Body					TRUE	0.654112	0.378488	-0.275624
cg06857159	37	1	7980932	TNFRSF9	NM_001561	Body						0.651263	0.301227	-0.350036
cg16117781	37	1	7991159	TNFRSF9	NM_001561	Body					TRUE	0.739605	0.480435	-0.25917
cg08840010	37	1	8000314	TNFRSF9	NM_001561	5'UTR	chr1:8002408-8002699	N_Shelf			TRUE	0.706164	0.430354	-0.27581
cg23542859	37	1	8003422	TNFRSF9	NM_001561	TSS200	chr1:8002408-8002699	S_Shore				0.593333	0.298345	-0.294989
cg19274341	37	1	8143891								TRUE	0.64344	0.342374	-0.301066
cg00059459	37	1	8343575							chr1:8343223-8343223	TRUE	0.634829	0.298116	-0.336713
cg13699944	37	1	8429665	RERE;RERE;RERE	NM_001042682;NM_001042681;NM_012102	5'UTR;Body;Body						0.744454	0.459234	-0.285219
cg08495477	37	1	8443147	RERE;RERE;RERE	NM_001042682;NM_001042681;NM_012102	5'UTR;Body;Body						0.731341	0.440167	-0.291174
cg05045335	37	1	8457417	RERE;RERE;RERE	NM_001042682;NM_012102;NM_001042681	5'UTR;Body;Body					TRUE	0.532506	0.24072	-0.291787
cg20316440	37	1	8457758	RERE;RERE;RERE	NM_001042682;NM_012102;NM_001042681	5'UTR;Body;Body					TRUE	0.516994	0.171976	-0.345019
cg25817655	37	1	8487870	LOC102724552;RERE;RERE	NR_125999;NM_001042681;NM_012102	Body;Body;Body	chr1:8483389-8484339	S_Shelf		chr1:8487656-8487656		0.773223	0.381616	-0.391608
cg12764441	37	1	8662670	RERE;RERE	NM_012102;NM_001042681	Body;Body					TRUE	0.92467	0.642774	-0.281896
cg17442683	37	1	8664311	RERE;RERE	NM_012102;NM_001042681	Body;Body					TRUE	0.756809	0.466867	-0.289942
cg23434216	37	1	9291085				chr1:9294401-9295118	N_Shelf				0.808232	0.501323	-0.306909
cg11860632	37	1	9486173	LOC100506022;LOC100506022	NR_104623;NR_104622	Body;Body	chr1:9488937-9489249	N_Shelf				0.663434	0.407422	-0.256012
cg04717485	37	1	9486780				chr1:9488937-9489249	N_Shelf			TRUE	0.562501	0.3101	-0.252401
cg18301903	37	1	9704140									0.822691	0.561337	-0.261354
cg20994801	37	1	9711398	PIK3CD	NM_005026	TSS1500	chr1:9711780-9713001	N_Shore			TRUE	0.807833	0.536706	-0.271127
cg00231528	37	1	9714280	C1orf200;PIK3CD	NR_027045;NM_005026	Body;5'UTR	chr1:9711780-9713001	S_Shore			TRUE	0.673782	0.307636	-0.366146
cg08854008	37	1	9714397	C1orf200;PIK3CD	NR_027045;NM_005026	Body;5'UTR	chr1:9711780-9713001	S_Shore			TRUE	0.706713	0.412196	-0.294518
cg14989202	37	1	9714843	C1orf200;PIK3CD	NR_027045;NM_005026	TSS200;5'UTR	chr1:9711780-9713001	S_Shore			TRUE	0.866059	0.570887	-0.295172
cg20546648	37	1	9764863	PIK3CD	NM_005026	5'UTR						0.795579	0.508399	-0.28718
cg07487555	37	1	9778058	PIK3CD	NM_005026	Body	chr1:9775708-9775997	S_Shelf				0.868806	0.585445	-0.283361
cg01320698	37	1	9788517	PIK3CD	NM_005026	3'UTR	chr1:9790292-9790704	N_Shore			TRUE	0.847954	0.586756	-0.261198
cg21308660	37	1	10276442	KIF1B;KIF1B	NM_015074;NM_183416	5'UTR;5'UTR						0.671223	0.302688	-0.368534
cg04396360	37	1	10616484	PEX14	NM_004565	Body						0.645435	0.336281	-0.309155
cg17480077	37	1	10895517				chr1:10895895-10896117	N_Shore			TRUE	0.708239	0.402349	-0.30589
cg02971581	37	1	10895950				chr1:10895895-10896117	Island			TRUE	0.45134	0.198755	-0.252585
cg26426938	37	1	10948457								TRUE	0.61902	0.309738	-0.309282
cg15396877	37	1	10972521									0.870353	0.611733	-0.258619
cg05914005	37	1	10992446									0.76841	0.411039	-0.35737
cg04224025	37	1	10992454								TRUE	0.705973	0.373817	-0.332156
cg18285377	37	1	11025263	C1orf127;C1orf127	NM_173507;NM_001170754	TSS1500;Body					TRUE	0.671465	0.37799	-0.293475
cg13875012	37	1	11710610	FBXO2	NM_012168	Body	chr1:11710459-11710788	Island			TRUE	0.4899	0.17093	-0.31897
cg02156723	37	1	12100631								TRUE	0.541916	0.287932	-0.253984
cg22428027	37	1	12128827	TNFRSF8	NM_001243	Body					TRUE	0.648917	0.353663	-0.295254
cg25382900	37	1	12148326	TNFRSF8	NM_001243	Body					TRUE	0.874112	0.587485	-0.286627
cg01863011	37	1	12148346	TNFRSF8;TNFRSF8	NM_001281430;NM_001243	5'UTR;Body						0.830654	0.526782	-0.303872
cg11732301	37	1	12210795							chr1:12210430-12210430	TRUE	0.750406	0.393481	-0.356925
cg12161045	37	1	12233184	TNFRSF1B	NM_001066	Body						0.86029	0.590908	-0.269382
cg20136855	37	1	12233852	TNFRSF1B	NM_001066	Body				chr1:12233600-12233600	TRUE	0.658588	0.392057	-0.26653
cg23843705	37	1	12270775								TRUE	0.729087	0.404129	-0.324958
cg06758644	37	1	12533120	VPS13D;VPS13D	NM_015378;NM_018156	Body;Body					TRUE	0.837304	0.559828	-0.277475
cg06913365	37	1	13825255	LRRC38	NM_001010847	Body				chr1:13825180-13825180		0.613413	0.313623	-0.299791
cg10396741	37	1	14059689	PRDM2;PRDM2;PRDM2	NM_015866;NM_012231;NM_001135610	Body;Body;Body						0.801825	0.433597	-0.368228
cg09858767	37	1	14742375								TRUE	0.768475	0.514142	-0.254333
cg06151579	37	1	14862767									0.551696	0.258122	-0.293574
cg02927252	37	1	14926373	KIAA1026;KIAA1026	NM_201628;NM_015209	Body;Body	chr1:14924610-14925993	S_Shore			TRUE	0.664306	0.363885	-0.300421
cg01650295	37	1	14926521	KAZN;KAZN	NM_015209;NM_201628	Body;Body	chr1:14924610-14925993	S_Shore		chr1:14926383-14926383		0.729972	0.416018	-0.313954
cg19626253	37	1	15062529	KIAA1026;KIAA1026	NM_201628;NM_015209	Body;Body					TRUE	0.738689	0.445824	-0.292865
cg01567509	37	1	15104223	KIAA1026;KIAA1026	NM_201628;NM_015209	Body;Body					TRUE	0.811899	0.51743	-0.294469
cg05046721	37	1	15208255	KIAA1026;KIAA1026	NM_201628;NM_015209	Body;Body					TRUE	0.92134	0.65096	-0.27038
cg14472069	37	1	15321159	KAZN;KAZN;KAZN;KAZN;KAZN	NM_015209;NM_201628;NM_001018000;NM_001017999;NM_001018001	Body;Body;Body;Body;Body						0.630276	0.324093	-0.306184
cg23691215	37	1	15335679	KAZN;KAZN;KAZN;KAZN;KAZN	NM_015209;NM_201628;NM_001018000;NM_001017999;NM_001018001	Body;Body;Body;Body;Body				chr1:15335392-15335392		0.685919	0.418714	-0.267205
cg17657618	37	1	15427654	KIAA1026	NM_201628	Body					TRUE	0.660912	0.3153	-0.345612
cg19646491	37	1	15575718	FHAD1	NM_052929	5'UTR	chr1:15573620-15573953	S_Shore				0.77983	0.367506	-0.412324
cg27582527	37	1	15734285				chr1:15736033-15737228	N_Shore			TRUE	0.706923	0.392085	-0.314839
cg25978218	37	1	15738732	EFHD2	NM_024329	Body	chr1:15736033-15737228	S_Shore		chr1:15738661-15738661	TRUE	0.740719	0.438455	-0.302264
cg23945334	37	1	15738831	EFHD2	NM_024329	Body	chr1:15736033-15737228	S_Shore		chr1:15738661-15738661		0.725408	0.472207	-0.253201
cg00004667	37	1	16292746	ZBTB17	NM_003443	5'UTR				chr1:16292565-16292565	TRUE	0.370344	0.0903806	-0.279963
cg11760836	37	1	16698494	SZRD1;SZRD1;SZRD1;SZRD1;SZRD1;SZRD1	NR_073503;NR_073502;NR_073501;NR_073500;NM_001114600;NM_001271869	Body;Body;Body;Body;Body;Body						0.591555	0.103416	-0.488139
cg09462412	37	1	16871298				chr1:16874401-16874813	N_Shelf				0.835884	0.573819	-0.262065
cg03529195	37	1	17189622				chr1:17186111-17186523	S_Shelf				0.799348	0.478565	-0.320783
cg09690283	37	1	17455095							chr1:17454855-17454855		0.375846	0.108369	-0.267477
cg23013029	37	1	17508341								TRUE	0.894463	0.606591	-0.287872
cg19414383	37	1	17528238								TRUE	0.674513	0.339184	-0.335329
cg14561834	37	1	17682613	PADI4	NM_012387	Body					TRUE	0.683335	0.391265	-0.29207
cg02323129	37	1	17965346	ARHGEF10L;ARHGEF10L	NM_018125;NM_001011722	Body;Body						0.872345	0.621196	-0.251149
cg19420599	37	1	17966166	ARHGEF10L;ARHGEF10L	NM_018125;NM_001011722	Body;Body						0.888723	0.62366	-0.265063
cg16075921	37	1	18202141									0.701191	0.343939	-0.357252
cg15223126	37	1	18392089	LOC101927876	NR_125946	TSS200						0.807443	0.54341	-0.264033
cg10121824	37	1	18643557	IGSF21	NM_032880	Body						0.812586	0.554728	-0.257858
cg14159531	37	1	18976501	PAX7;PAX7;PAX7	NM_013945;NM_002584;NM_001135254	Body;Body;Body	chr1:18973028-18973304	S_Shelf				0.629053	0.37692	-0.252133
cg17625389	37	1	18982383	PAX7;PAX7;PAX7	NM_013945;NM_002584;NM_001135254	Body;Body;Body						0.46141	0.119608	-0.341802
cg16933147	37	1	19000539	PAX7;PAX7;PAX7	NM_013945;NM_002584;NM_001135254	Body;Body;Body						0.449763	0.179447	-0.270316
cg27490286	37	1	19057702	PAX7;PAX7;PAX7	NM_013945;NM_002584;NM_001135254	Body;Body;Body						0.467783	0.171266	-0.296518
cg16443716	37	1	19330155									0.831585	0.558643	-0.272943
cg03654273	37	1	19803932	CAPZB	NM_004930	Body				chr1:19803913-19803913	TRUE	0.68832	0.350604	-0.337716
cg21470993	37	1	19828942									0.827416	0.572502	-0.254914
cg05828408	37	1	19832306									0.614466	0.325106	-0.28936
cg10564533	37	1	20575658									0.528789	0.222981	-0.305807
cg08623420	37	1	20649775	VWA5B1	NM_001039500	Body						0.849427	0.556808	-0.292619
cg02187937	37	1	21005254	KIF17;KIF17;KIF17	NM_001287212;NM_001122819;NM_020816	Body;Body;Body						0.633378	0.359678	-0.2737
cg15866363	37	1	21620071	LOC100506801;ECE1	NR_038404;NM_001113348	Body;Body	chr1:21616380-21617101	S_Shelf				0.660029	0.335489	-0.32454
cg10699884	37	1	21661045	ECE1	NM_001113348	Body				chr1:21660622-21660622	TRUE	0.415967	0.12611	-0.289857
cg15212266	37	1	21879311	ALPL;ALPL	NM_000478;NM_001127501	5'UTR;5'UTR					TRUE	0.432798	0.164052	-0.268746
cg12466599	37	1	21894532	ALPL;ALPL	NM_001127501;NM_000478	Body;Body					TRUE	0.741897	0.481777	-0.26012
cg14682556	37	1	21909458									0.786747	0.505381	-0.281366
cg06165723	37	1	21962978	RAP1GAP;RAP1GAP;RAP1GAP	NM_001145658;NM_002885;NM_001145657	Body;5'UTR;5'UTR						0.732879	0.437689	-0.29519
cg10862160	37	1	21984544	RAP1GAP;RAP1GAP	NM_002885;NM_001145657	5'UTR;5'UTR	chr1:21985703-21986102	N_Shore				0.743635	0.491372	-0.252263
cg27522078	37	1	22290005								TRUE	0.778618	0.501007	-0.277611
cg17002767	37	1	22579251									0.813538	0.520926	-0.292612
cg23360332	37	1	22589385									0.776651	0.499488	-0.277163
cg00831127	37	1	23038925	EPHB2;EPHB2	NM_004442;NM_017449	Body;Body	chr1:23036823-23038362	S_Shore			TRUE	0.737456	0.466392	-0.271065
cg26098679	37	1	23681008									0.78422	0.317436	-0.466784
cg06267139	37	1	23704878									0.666608	0.395346	-0.271262
cg09923668	37	1	23864102									0.724133	0.444991	-0.279142
cg11180237	37	1	23903795							chr1:23903714-23903714		0.555681	0.285642	-0.270039
cg12362977	37	1	23928846									0.889161	0.633694	-0.255467
cg20055966	37	1	23991471									0.723313	0.46473	-0.258583
cg04804365	37	1	24237531	CNR2	NM_001841	5'UTR				chr1:24237439-24237439		0.725661	0.299501	-0.42616
cg16679650	37	1	24239820	CNR2	NM_001841	TSS200					TRUE	0.674554	0.373796	-0.300758
cg16410115	37	1	24240000	CNR2	NM_001841	TSS200					TRUE	0.678027	0.411971	-0.266056
cg18128887	37	1	24861708	RCAN3	NM_013441	Body	chr1:24861702-24861920	Island			TRUE	0.84966	0.584729	-0.264931
cg13461622	37	1	25291385	RUNX3;RUNX3	NM_001031680;NM_001031680	1stExon;5'UTR					TRUE	0.741591	0.440474	-0.301118
cg27058497	37	1	25291546	RUNX3	NM_001031680	TSS200					TRUE	0.716172	0.423482	-0.29269
cg09993145	37	1	25291905	RUNX3	NM_001031680	TSS1500					TRUE	0.730914	0.432934	-0.29798
cg21994143	37	1	25319308									0.698138	0.363834	-0.334303
cg11857259	37	1	25363655									0.54008	0.228705	-0.311375
cg24913342	37	1	25426436									0.810008	0.523584	-0.286424
cg07089262	37	1	25427958									0.698327	0.376459	-0.321868
cg15698548	37	1	25554514	SYF2;SYF2	NM_207170;NM_015484	Body;Body						0.778622	0.495671	-0.28295
cg18850343	37	1	25969530	MAN1C1;MAN1C1	NM_020379;NM_001289010	Body;Body				chr1:25969249-25969249		0.72073	0.332422	-0.388307
cg07424646	37	1	26031001	MAN1C1;MAN1C1	NM_020379;NM_001289010	Body;Body						0.50008	0.208421	-0.291659
cg20616108	37	1	26547234								TRUE	0.754114	0.492328	-0.261786
cg05576296	37	1	26614241	UBXN11;UBXN11;UBXN11	NM_001077262;NM_145345;NM_183008	Body;Body;Body				chr1:26613887-26613887		0.787815	0.410208	-0.377608
cg12709196	37	1	26616481	UBXN11;UBXN11;UBXN11	NM_001077262;NM_145345;NM_183008	Body;Body;Body				chr1:26616270-26616270		0.831923	0.558913	-0.27301
cg03373913	37	1	26644762	CD52;UBXN11	NM_001803;NM_145345	Body;TSS200						0.875706	0.616922	-0.258785
cg22517705	37	1	26645313	CD52;UBXN11	NM_001803;NM_145345	Body;TSS1500					TRUE	0.770564	0.389015	-0.381549
cg12001491	37	1	26645487	CD52;UBXN11	NM_001803;NM_145345	Body;TSS1500						0.881938	0.573366	-0.308572
cg05406621	37	1	26699973	ZNF683;ZNF683;ZNF683	NM_001114759;NM_173574;NM_001307925	TSS1500;TSS1500;TSS1500						0.784621	0.465432	-0.319189
cg20745693	37	1	26909537									0.629578	0.282298	-0.347281
cg02593099	37	1	27011393									0.873027	0.587948	-0.285079
cg18973247	37	1	27070873	ARID1A;ARID1A	NM_006015;NM_139135	Body;Body					TRUE	0.561845	0.140406	-0.421439
cg23682945	37	1	27400973							chr1:27400779-27400779		0.487987	0.175758	-0.312229
cg02634805	37	1	27936307									0.816506	0.565212	-0.251294
cg20485084	37	1	27945005	FGR;FGR;FGR	NM_001042729;NM_001042747;NM_005248	Body;Body;Body	chr1:27941865-27942324	S_Shelf			TRUE	0.884298	0.580422	-0.303876
cg01913767	37	1	27989282				chr1:27986305-27986808	S_Shelf				0.813798	0.557913	-0.255885
cg07949416	37	1	27989396				chr1:27986305-27986808	S_Shelf				0.54072	0.215416	-0.325304
cg11176159	37	1	28213800								TRUE	0.721359	0.462663	-0.258696
cg23592919	37	1	28213868							chr1:28213825-28213825		0.811682	0.502125	-0.309557
cg27182070	37	1	28218282	RPA2	NM_002946	3'UTR					TRUE	0.835665	0.575691	-0.259975
cg23448720	37	1	28270137	SMPDL3B;SMPDL3B;SMPDL3B	NM_001304579;NM_001009568;NM_014474	5'UTR;Body;Body				chr1:28269913-28269913		0.630981	0.363412	-0.267569
cg04749781	37	1	28441902									0.736167	0.437359	-0.298807
cg17944368	37	1	28495978	PTAFR;PTAFR;PTAFR;PTAFR	NM_001164723;NM_000952;NM_001164722;NM_001164721	5'UTR;5'UTR;5'UTR;5'UTR				chr1:28495580-28495580		0.905181	0.625643	-0.279538
cg09818863	37	1	28624451									0.787634	0.487815	-0.299819
cg00914222	37	1	29585898	PTPRU;PTPRU;PTPRU	NM_133178;NM_133177;NM_005704	Body;Body;Body	chr1:29585897-29586598	Island			TRUE	0.664463	0.379446	-0.285018
cg13865019	37	1	29681991									0.715408	0.362267	-0.35314
cg16824692	37	1	30182416									0.660489	0.390576	-0.269914
cg12737620	37	1	30184633									0.718949	0.37484	-0.34411
cg08160592	37	1	30184991									0.529991	0.1092	-0.420791
cg13296839	37	1	30798598									0.681786	0.429859	-0.251927
cg07270017	37	1	30990207									0.800687	0.52935	-0.271338
cg06763549	37	1	31118863									0.803908	0.536406	-0.267502
cg03749154	37	1	31155158				chr1:31158009-31158261	N_Shelf			TRUE	0.750521	0.487068	-0.263454
cg19510565	37	1	31217240	LAPTM5	NM_006762	Body					TRUE	0.75874	0.503935	-0.254804
cg15459165	37	1	31223850	LAPTM5	NM_006762	Body				chr1:31223594-31223594	TRUE	0.81778	0.46276	-0.35502
cg17722508	37	1	31228006	LAPTM5	NM_006762	Body				chr1:31227443-31227443		0.791794	0.526948	-0.264846
cg17418085	37	1	31229122	LAPTM5	NM_006762	Body					TRUE	0.700083	0.39015	-0.309932
cg09782763	37	1	31230737	LAPTM5	NM_006762	TSS200						0.610877	0.331827	-0.279049
cg24459792	37	1	31230846	LAPTM5	NM_006762	TSS200					TRUE	0.788998	0.395246	-0.393751
cg14854525	37	1	31263794									0.587896	0.265251	-0.322646
cg17736150	37	1	31661388	NKAIN1	NM_024522	Body						0.731563	0.472451	-0.259112
cg03596592	37	1	31695179	NKAIN1	NM_024522	Body						0.643531	0.334485	-0.309046
cg07285490	37	1	32071681									0.905618	0.488731	-0.416887
cg27650656	37	1	32173419				chr1:32169537-32169869	S_Shelf				0.401243	0.119477	-0.281765
cg14625801	37	1	32216877	ADGRB2;ADGRB2	NM_001294336;NM_001294335	Body;Body						0.755746	0.442061	-0.313685
cg07222861	37	1	32355084							chr1:32354934-32354934	TRUE	0.784518	0.405077	-0.379442
cg22232164	37	1	32610876	KPNA6	NM_012316	Body						0.614247	0.318418	-0.295829
cg07571745	37	1	32715428	LCK	NM_005356	TSS1500	chr1:32713918-32714186	S_Shore			TRUE	0.796399	0.517341	-0.279057
cg02184418	37	1	32715449	LCK	NM_005356	TSS1500	chr1:32713918-32714186	S_Shore				0.894832	0.630103	-0.264729
cg12710152	37	1	32716773	LCK	NM_005356	TSS200	chr1:32713918-32714186	S_Shelf			TRUE	0.802976	0.485612	-0.317364
cg25913475	37	1	32716807	LCK	NM_005356	TSS200	chr1:32713918-32714186	S_Shelf				0.696393	0.422077	-0.274316
cg19417940	37	1	32716817	LCK	NM_005356	TSS200	chr1:32713918-32714186	S_Shelf				0.844374	0.545636	-0.298739
cg13623108	37	1	32716827	LCK	NM_005356	TSS200	chr1:32713918-32714186	S_Shelf				0.763793	0.452288	-0.311505
cg20047483	37	1	32732649	LCK	NM_005356	5'UTR				chr1:32732571-32732571		0.579597	0.254109	-0.325488
cg18857467	37	1	32787489	HDAC1	NM_004964	Body					TRUE	0.739523	0.455277	-0.284246
cg02534418	37	1	33383395									0.816294	0.506134	-0.31016
cg03267959	37	1	33511511									0.721283	0.457889	-0.263394
cg01481000	37	1	33514858				chr1:33516594-33516933	N_Shore			TRUE	0.621064	0.337546	-0.283518
cg03858102	37	1	33515278				chr1:33516594-33516933	N_Shore				0.650533	0.391184	-0.25935
cg14281403	37	1	33806555	PHC2;PHC2	NM_004427;NM_198040	5'UTR;Body						0.62119	0.256852	-0.364338
cg13150854	37	1	34005181	CSMD2;CSMD2	NM_001281956;NM_052896	Body;Body						0.865065	0.571471	-0.293593
cg14615152	37	1	34093099	CSMD2	NM_052896	Body	chr1:34090605-34090854	S_Shelf			TRUE	0.783188	0.520439	-0.262748
cg06723898	37	1	34280915	CSMD2;CSMD2	NM_001281956;NM_052896	Body;Body						0.808197	0.50728	-0.300917
cg01829623	37	1	34280936	CSMD2;CSMD2	NM_001281956;NM_052896	Body;Body						0.767434	0.467198	-0.300236
cg04471171	37	1	34577639	CSMD2;CSMD2	NM_001281956;NM_052896	Body;Body						0.675221	0.394944	-0.280278
cg17281572	37	1	35166661									0.740004	0.468307	-0.271698
cg12278018	37	1	35266042									0.766422	0.352605	-0.413817
cg26228266	37	1	35351340	DLGAP3	NM_001080418	Body	chr1:35350878-35351854	Island			TRUE	0.502359	0.163444	-0.338915
cg18852567	37	1	35351627	DLGAP3	NM_001080418	Body	chr1:35350878-35351854	Island			TRUE	0.529117	0.22601	-0.303107
cg13550410	37	1	36004549	KIAA0319L	NM_024874	Body					TRUE	0.646849	0.334959	-0.31189
cg13531542	37	1	36004559	KIAA0319L	NM_024874	Body						0.613814	0.299631	-0.314183
cg17127811	37	1	36228011	CLSPN;CLSPN;CLSPN;CLSPN	NM_001190481;NM_022111;NM_001190481;NM_022111	ExonBnd;ExonBnd;Body;Body						0.777013	0.429849	-0.347164
cg01833470	37	1	36270210				chr1:36273499-36274461	N_Shelf			TRUE	0.653136	0.342748	-0.310388
cg25644447	37	1	36408500	AGO3;AGO3	NM_177422;NM_024852	5'UTR;Body						0.808825	0.479723	-0.329102
cg00859858	37	1	37944257	ZC3H12A	NM_025079	Body	chr1:37939723-37940650	S_Shelf		chr1:37944084-37944084	TRUE	0.671412	0.419803	-0.251609
cg01967642	37	1	38229476	EPHA10;EPHA10	NM_173641;NM_001099439	Body;Body	chr1:38229838-38230888	N_Shore			TRUE	0.587888	0.307557	-0.280331
cg23262274	37	1	38412519	INPP5B	NM_005540	5'UTR			low-CpG:38185100-38185328		TRUE	0.490612	0.19004	-0.300573
cg17949727	37	1	38412684	INPP5B;INPP5B	NM_005540;NM_005540	5'UTR;1stExon			low-CpG:38185100-38185328		TRUE	0.498173	0.213341	-0.284833
cg10784030	37	1	38412688	INPP5B;INPP5B	NM_005540;NM_005540	5'UTR;1stExon			low-CpG:38185100-38185328		TRUE	0.494168	0.167494	-0.326674
cg05749969	37	1	38412711	INPP5B;INPP5B	NM_005540;NM_005540	5'UTR;1stExon			low-CpG:38185100-38185328		TRUE	0.615065	0.277843	-0.337222
cg07681211	37	1	38577156									0.692717	0.420264	-0.272453
cg25879102	37	1	38600119								TRUE	0.364807	0.112676	-0.252131
cg07509708	37	1	38619210									0.528331	0.257557	-0.270774
cg16041823	37	1	38679616	LINC01343	NR_038928	Body						0.568101	0.292366	-0.275735
cg06058681	37	1	38757813								TRUE	0.558722	0.307642	-0.25108
cg16737808	37	1	38948122							chr1:38948025-38948025		0.615589	0.31791	-0.29768
cg11848788	37	1	39041399				chr1:39044059-39044561	N_Shelf			TRUE	0.763735	0.46394	-0.299794
cg27114691	37	1	39208576									0.685363	0.428231	-0.257132
cg02191674	37	1	39428263									0.74209	0.4587	-0.28339
cg24159575	37	1	39662235	MACF1	NM_012090	Body					TRUE	0.733444	0.475654	-0.257791
cg21480214	37	1	39670106	MACF1	NM_012090	Body						0.514905	0.233331	-0.281574
cg19790515	37	1	39670192	MACF1	NM_012090	Body						0.475034	0.176962	-0.298071
cg14747453	37	1	40063592									0.816653	0.472446	-0.344208
cg26034147	37	1	40359924								TRUE	0.915111	0.64685	-0.268261
cg18430892	37	1	40412071									0.779512	0.462424	-0.317087
cg20856378	37	1	40525169	CAP1;CAP1	NM_006367;NM_001105530	Body;Body						0.685653	0.38	-0.305653
cg02054003	37	1	40652215	RLF	NM_012421	Body						0.921141	0.636642	-0.284499
cg11958233	37	1	40736075	ZMPSTE24	NM_005857	Body						0.881645	0.571495	-0.310151
cg03915704	37	1	40851486	SMAP2;SMAP2	NM_022733;NM_001198978	Body;Body				chr1:40851431-40851431		0.737316	0.423664	-0.313652
cg05603736	37	1	40860592	SMAP2;SMAP2;SMAP2	NM_022733;NM_001198978;NM_001198979	Body;Body;Body				chr1:40860574-40860574		0.842931	0.507135	-0.335796
cg01595555	37	1	40866148	SMAP2;SMAP2;SMAP2;SMAP2	NM_001198980;NM_022733;NM_001198978;NM_001198979	5'UTR;Body;Body;Body				chr1:40866111-40866111		0.659857	0.393152	-0.266705
cg13688351	37	1	41849873				chr1:41847264-41849204	S_Shore				0.920498	0.444252	-0.476246
cg08021237	37	1	42149162	HIVEP3;HIVEP3	NM_001127714;NM_024503	5'UTR;5'UTR						0.844147	0.492162	-0.351986
cg17892259	37	1	42149829	HIVEP3;HIVEP3	NM_024503;NM_001127714	5'UTR;5'UTR					TRUE	0.706411	0.32392	-0.382491
cg24254842	37	1	42193353	HIVEP3;HIVEP3	NM_024503;NM_001127714	5'UTR;5'UTR				chr1:42192975-42192975	TRUE	0.565586	0.307578	-0.258008
cg23114964	37	1	42217077	HIVEP3;HIVEP3	NM_024503;NM_001127714	5'UTR;5'UTR					TRUE	0.507389	0.247919	-0.25947
cg17539088	37	1	42265746	HIVEP3;HIVEP3	NM_001127714;NM_024503	5'UTR;5'UTR						0.569706	0.313573	-0.256133
cg04497870	37	1	42277284	HIVEP3;HIVEP3	NM_001127714;NM_024503	5'UTR;5'UTR				chr1:42277077-42277077		0.698146	0.327916	-0.37023
cg26731143	37	1	42357199	HIVEP3;HIVEP3;HIVEP3;HIVEP3	NM_001127714;NM_024503;NR_038260;NR_038261	5'UTR;5'UTR;Body;Body				chr1:42356899-42356899		0.562659	0.237171	-0.325488
cg14456173	37	1	43437674	SLC2A1-AS1	NR_033967	Body						0.772319	0.489302	-0.283018
cg06238169	37	1	43687159	CFAP57	NM_001195831	Body						0.809338	0.555052	-0.254286
cg14525270	37	1	43766647	TIE1	NM_005424	TSS200	chr1:43770522-43770880	N_Shelf			TRUE	0.751216	0.439927	-0.311289
cg19014705	37	1	44026770	PTPRF;PTPRF	NM_130440;NM_002840	Body;Body						0.921143	0.656199	-0.264944
cg26388182	37	1	44331632	ST3GAL3;ST3GAL3;ST3GAL3;ST3GAL3;ST3GAL3;ST3GAL3;ST3GAL3;ST3GAL3;ST3GAL3;ST3GAL3;ST3GAL3;ST3GAL3;ST3GAL3;ST3GAL3;ST3GAL3;ST3GAL3;ST3GAL3;ST3GAL3;ST3GAL3;ST3GAL3;ST3GAL3;ST3GAL3;ST3GAL3;ST3GAL3;ST3GAL3	NR_073019;NR_073017;NR_073018;NR_073023;NR_073016;NR_073020;NR_073021;NM_001270465;NM_001270463;NM_001270464;NM_001270466;NM_174967;NM_174965;NM_174970;NM_174968;NM_174966;NM_174964;NM_174963;NM_006279;NM_001270459;NM_001270460;NM_001270461;NM_001270462;NM_174971;NM_174969	Body;Body;Body;Body;Body;Body;Body;Body;Body;Body;Body;Body;Body;Body;Body;Body;Body;Body;Body;Body;Body;Body;Body;Body;Body						0.898599	0.557434	-0.341166
cg23557935	37	1	44876312	RNF220	NM_018150	5'UTR	chr1:44871109-44874047	S_Shelf				0.613926	0.341923	-0.272003
cg00069860	37	1	44883227	RNF220	NM_018150	Body	chr1:44883136-44884272	Island			TRUE	0.460033	0.193452	-0.266581
cg08037920	37	1	45189335	C1orf228	NM_001145636	Body	chr1:45189705-45190558	N_Shore				0.645729	0.304546	-0.341182
cg23039677	37	1	45875131	TESK2	NM_007170	Body				chr1:45875042-45875042		0.682442	0.403165	-0.279277
cg03231785	37	1	45989380	PRDX1	NM_001202431	TSS1500	chr1:45987163-45987803	S_Shore				0.800138	0.531216	-0.268922
cg13359332	37	1	46009622							chr1:46009549-46009549		0.384707	0.106847	-0.27786
cg05683586	37	1	46010892							chr1:46010722-46010722		0.63503	0.36915	-0.26588
cg10685628	37	1	46251517									0.829189	0.554995	-0.274194
cg27447795	37	1	46309093	MAST2	NM_015112	Body						0.644853	0.352969	-0.291884
cg06245305	37	1	48227883	TRABD2B	NM_001194986	3'UTR						0.845221	0.454652	-0.390569
cg05901141	37	1	48384445	TRABD2B	NM_001194986	Body						0.779396	0.495302	-0.284094
cg04705737	37	1	48417583	TRABD2B	NM_001194986	Body						0.890221	0.638422	-0.251799
cg15001714	37	1	48459813				chr1:48459812-48460061	Island			TRUE	0.813304	0.547917	-0.265387
cg19492975	37	1	48515675							chr1:48515615-48515615		0.68659	0.406042	-0.280548
cg03095642	37	1	48693554	SLC5A9;SLC5A9	NM_001011547;NM_001135181	Body;Body						0.575588	0.303845	-0.271743
cg14705496	37	1	48710964	SLC5A9;SLC5A9	NM_001011547;NM_001135181	Body;Body				chr1:48710829-48710829		0.501921	0.201718	-0.300204
cg01201024	37	1	49120388	AGBL4	NM_032785	Body						0.590637	0.337309	-0.253328
cg13487388	37	1	49157163	AGBL4	NM_032785	Body						0.712694	0.459282	-0.253412
cg23090529	37	1	51442133				chr1:51443311-51444036	N_Shore			TRUE	0.743453	0.483894	-0.259559
cg10531339	37	1	51634267									0.615597	0.360479	-0.255119
cg09695061	37	1	51661252									0.698827	0.351691	-0.347136
cg03390829	37	1	51734196	RNF11	NM_014372	Body						0.770317	0.492442	-0.277875
cg03224992	37	1	51750976									0.893722	0.612902	-0.28082
cg20531001	37	1	51895612	EPS15	NM_001981	Body						0.747179	0.359904	-0.387275
cg25797670	37	1	52014992									0.590874	0.259608	-0.331266
cg24528574	37	1	52110450	OSBPL9;OSBPL9;OSBPL9;OSBPL9;OSBPL9	NR_036662;NM_148909;NM_148908;NM_148906;NM_024586	Body;Body;Body;Body;Body				chr1:52110368-52110368		0.760989	0.459523	-0.301466
cg24173884	37	1	52195670	OSBPL9;OSBPL9;OSBPL9;OSBPL9;OSBPL9;OSBPL9;OSBPL9;OSBPL9;OSBPL9;OSBPL9	NM_148907;NM_148905;NM_148904;NM_148905;NM_148904;NR_036662;NM_148909;NM_148908;NM_148906;NM_024586	1stExon;1stExon;1stExon;5'UTR;5'UTR;Body;Body;Body;Body;Body	chr1:52195028-52195821	Island				0.468733	0.205562	-0.263172
cg12503224	37	1	52206444	OSBPL9;OSBPL9;OSBPL9;OSBPL9;OSBPL9;OSBPL9;OSBPL9;OSBPL9	NM_148905;NM_148904;NM_148907;NR_036662;NM_148909;NM_148908;NM_148906;NM_024586	5'UTR;5'UTR;Body;Body;Body;Body;Body;Body						0.857977	0.535319	-0.322658
cg16602500	37	1	52889575	ZCCHC11;ZCCHC11;ZCCHC11	NM_015269;NM_001009882;NM_001009881	3'UTR;3'UTR;3'UTR					TRUE	0.744573	0.465194	-0.279379
cg17441401	37	1	53794150	LRP8;LRP8;LRP8;LRP8	NM_033300;NM_017522;NM_001018054;NM_004631	TSS1500;TSS1500;TSS1500;TSS1500	chr1:53791687-53793496	S_Shore			TRUE	0.495431	0.177164	-0.318266
cg13168314	37	1	54051041	GLIS1	NM_147193	Body					TRUE	0.591349	0.310259	-0.28109
cg25841116	37	1	55054291	ACOT11;ACOT11	NM_147161;NM_015547	Body;Body						0.619689	0.366851	-0.252838
cg16363276	37	1	55617192	USP24	NM_015306	Body						0.894213	0.514578	-0.379635
cg21081913	37	1	55670687	USP24	NM_015306	Body						0.724591	0.469741	-0.25485
cg17890932	37	1	55675110	USP24	NM_015306	Body						0.51707	0.198695	-0.318375
cg15198751	37	1	55683337				chr1:55680465-55681708	S_Shore				0.516376	0.248052	-0.268324
cg26851805	37	1	55683355				chr1:55680465-55681708	S_Shore				0.501157	0.232051	-0.269106
cg00765676	37	1	55683373				chr1:55680465-55681708	S_Shore				0.470657	0.211572	-0.259085
cg10853046	37	1	55710214									0.79447	0.495432	-0.299039
cg22037030	37	1	56139081								TRUE	0.908047	0.641665	-0.266382
cg19253379	37	1	56206919								TRUE	0.628909	0.361468	-0.267441
cg26891574	37	1	56288471									0.897703	0.622202	-0.275501
cg04395864	37	1	56360479									0.631742	0.344104	-0.287639
cg19679543	37	1	56394286								TRUE	0.698446	0.415097	-0.283349
cg00042896	37	1	56534708									0.549324	0.2963	-0.253024
cg12201685	37	1	56879564									0.699861	0.442984	-0.256877
cg22658557	37	1	56938798									0.905964	0.650264	-0.2557
cg09403098	37	1	56991493	PPAP2B	NM_003713	Body				chr1:56991269-56991269		0.533057	0.186285	-0.346772
cg07712330	37	1	57031011	PPAP2B	NM_003713	Body						0.600653	0.217629	-0.383024
cg14267555	37	1	57045746	PPAP2B	NM_003713	TSS1500	chr1:57044102-57045117	S_Shore				0.460355	0.20651	-0.253845
cg13047196	37	1	57420485	C8B	NM_000066	Body					TRUE	0.874017	0.611838	-0.262179
cg02086722	37	1	57684724	DAB1	NM_021080	Body						0.862508	0.538376	-0.324132
cg27108990	37	1	58452425	DAB1	NM_021080	5'UTR						0.648368	0.342025	-0.306343
cg12629008	37	1	58625006	DAB1	NM_021080	5'UTR					TRUE	0.848704	0.577548	-0.271156
cg14377059	37	1	59183881								TRUE	0.826691	0.459878	-0.366813
cg15568628	37	1	59529453								TRUE	0.589554	0.307805	-0.281749
cg11808861	37	1	59629709							chr1:59629518-59629518		0.421635	0.164786	-0.256849
cg15085741	37	1	59758463				chr1:59762102-59762794	N_Shelf		chr1:59758328-59758328		0.476212	0.201787	-0.274425
cg12936304	37	1	59943123	FGGY;FGGY;FGGY;FGGY	NM_018291;NM_001244714;NM_001113411;NR_103473	Body;Body;Body;Body						0.720954	0.453197	-0.267757
cg06329202	37	1	60036324	FGGY;FGGY;FGGY;FGGY;FGGY	NM_018291;NM_001244714;NM_001113411;NM_001278224;NR_103473	Body;Body;Body;Body;Body				chr1:60036299-60036299		0.711766	0.292626	-0.41914
cg14788673	37	1	60164280	FGGY;FGGY	NM_018291;NM_001113411	Body;Body					TRUE	0.730236	0.46947	-0.260766
cg00502597	37	1	60197222	FGGY;FGGY	NM_018291;NM_001113411	Body;Body					TRUE	0.556438	0.276659	-0.279779
cg26839010	37	1	60477321	C1orf87	NM_152377	Body						0.699879	0.41329	-0.286589
cg07813031	37	1	61298421								TRUE	0.806388	0.555299	-0.251089
cg09894169	37	1	61423884	NFIA-AS2;NFIA-AS2	NR_110617;NR_110618	Body;Body						0.778469	0.486579	-0.29189
cg14645829	37	1	61450545									0.80654	0.551459	-0.255082
cg06062158	37	1	62675956	L1TD1;L1TD1	NM_001164835;NM_019079	Body;Body						0.841836	0.580358	-0.261479
cg12875748	37	1	63276315	ATG4C;ATG4C	NM_178221;NM_032852	Body;Body						0.884297	0.631206	-0.253091
cg00561183	37	1	64509006	ROR1;ROR1	NM_001083592;NM_005012	Body;Body						0.749031	0.431559	-0.317472
cg13757506	37	1	64639425	ROR1	NM_005012	Body						0.684887	0.347477	-0.33741
cg00218114	37	1	65157404	CACHD1;CACHD1	NM_001293274;NM_020925	3'UTR;3'UTR						0.438612	0.154876	-0.283736
cg15472145	37	1	65294640	RAVER2	NM_018211	Body						0.54451	0.195717	-0.348793
cg24691814	37	1	65673302	AK4;AK4;AK4	NM_001005353;NM_203464;NM_013410	Body;Body;Body						0.601089	0.299811	-0.301278
cg05347379	37	1	65681585	AK4;AK4;AK4	NM_001005353;NM_203464;NM_013410	Body;Body;Body						0.676121	0.381042	-0.295078
cg04111102	37	1	66153794								TRUE	0.437523	0.140317	-0.297206
cg20214404	37	1	66741905	PDE4B;PDE4B;PDE4B;PDE4B;PDE4B	NM_001037341;NM_002600;NM_001297440;NM_001297441;NM_001037340	Body;Body;Body;Body;Body						0.860432	0.513882	-0.34655
cg11386231	37	1	66742345	PDE4B;PDE4B;PDE4B;PDE4B;PDE4B	NM_001037341;NM_002600;NM_001297440;NM_001297441;NM_001037340	Body;Body;Body;Body;Body						0.792148	0.494038	-0.298109
cg05608389	37	1	66796739	PDE4B;PDE4B;PDE4B;PDE4B;PDE4B;PDE4B	NM_001037339;NM_001037341;NM_002600;NM_001297440;NM_001297441;NM_001037340	TSS1500;Body;Body;Body;Body;Body						0.681576	0.330307	-0.351269
cg08891882	37	1	66815977	PDE4B;PDE4B;PDE4B;PDE4B;PDE4B;PDE4B	NM_001037339;NM_001037341;NM_002600;NM_001297440;NM_001297441;NM_001037340	Body;Body;Body;Body;Body;Body				chr1:66815726-66815726		0.597374	0.244701	-0.352673
cg04989278	37	1	66839134	PDE4B;PDE4B;PDE4B;PDE4B	NM_001037340;NM_002600;NM_001037339;NM_001037341	3'UTR;3'UTR;3'UTR;3'UTR					TRUE	0.736767	0.466091	-0.270675
cg10495572	37	1	66911193							chr1:66910997-66910997	TRUE	0.731112	0.380499	-0.350613
cg10452799	37	1	66911669									0.887505	0.559489	-0.328016
cg26647036	37	1	66956611									0.67651	0.313704	-0.362806
cg12312765	37	1	66993557									0.853498	0.553539	-0.299959
cg26931601	37	1	67030196	SGIP1;SGIP1	NM_001308203;NM_032291	Body;Body				chr1:67029939-67029939		0.637178	0.168264	-0.468913
cg05430201	37	1	67205292	SGIP1;SGIP1	NM_001308203;NM_032291	Body;Body						0.647468	0.317505	-0.329963
cg13549101	37	1	67632012	IL23R	NM_144701	TSS200						0.720773	0.415484	-0.305288
cg02059478	37	1	68080498									0.672892	0.420506	-0.252386
cg11432101	37	1	68319511	GNG12-AS1	NR_040077	Body						0.547622	0.277893	-0.269728
cg21899340	37	1	68419196	GNG12-AS1	NR_040077	Body						0.82345	0.568462	-0.254989
cg13082262	37	1	69843439									0.798653	0.536461	-0.262192
cg19412808	37	1	69916760								TRUE	0.710383	0.433004	-0.277379
cg17922637	37	1	69988995									0.584589	0.290913	-0.293677
cg13008005	37	1	70225666	LRRC7	NM_020794	TSS200						0.861322	0.608411	-0.252911
cg02925615	37	1	70970229									0.605899	0.221639	-0.38426
cg15690995	37	1	71395925	PTGER3;PTGER3;PTGER3;PTGER3;PTGER3;PTGER3	NM_198714;NR_028294;NR_028293;NR_028292;NM_198717;NM_198716	3'UTR;Body;Body;Body;Body;Body						0.705571	0.358522	-0.347049
cg21421073	37	1	71445283	PTGER3;PTGER3;PTGER3;PTGER3;PTGER3;PTGER3;PTGER3;PTGER3;PTGER3	NM_198719;NR_028294;NR_028293;NR_028292;NM_198717;NM_198716;NM_198718;NM_198714;NM_001126044	Body;Body;Body;Body;Body;Body;Body;Body;Body						0.479231	0.189799	-0.289433
cg04285710	37	1	74891564	TNNI3K;TNNI3K	NM_001112808;NM_015978	Body;Body					TRUE	0.645969	0.335453	-0.310515
cg23690196	37	1	75823021	SLC44A5;SLC44A5	NM_001130058;NM_152697	Body;Body						0.796892	0.499095	-0.297797
cg24580071	37	1	76620271	ST6GALNAC3;ST6GALNAC3	NM_152996;NM_001160011	Body;Body					TRUE	0.38236	0.113259	-0.269101
cg18172358	37	1	76734569	ST6GALNAC3;ST6GALNAC3	NM_152996;NM_001160011	Body;Body					TRUE	0.818058	0.564956	-0.253101
cg27157437	37	1	77514103	ST6GALNAC5	NM_030965	Body						0.838082	0.520986	-0.317096
cg00193581	37	1	77879926	AK5;AK5	NM_174858;NM_012093	Body;Body						0.89195	0.547775	-0.344174
cg21472196	37	1	77970771	AK5;AK5	NM_174858;NM_012093	Body;Body						0.717406	0.454276	-0.263131
cg25701472	37	1	78392479	NEXN;NEXN	NM_001172309;NM_144573	Body;Body						0.912072	0.65325	-0.258822
cg24154145	37	1	78609061									0.649555	0.383411	-0.266144
cg26987606	37	1	78752481	MGC27382	NR_027310	Body						0.85141	0.57862	-0.27279
cg20286898	37	1	79518888									0.86476	0.5745	-0.29026
cg26059844	37	1	80041257									0.519119	0.245428	-0.273691
cg20320455	37	1	82014804	LOC101927434	NR_125943	Body						0.556276	0.231489	-0.324787
cg06822690	37	1	82040009								TRUE	0.678894	0.397374	-0.281521
cg11133714	37	1	82168746	ADGRL2	NM_001297704	5'UTR				chr1:82168687-82168687		0.709823	0.449159	-0.260663
cg16258569	37	1	82169315								TRUE	0.710306	0.457461	-0.252844
cg10061129	37	1	83445408								TRUE	0.810494	0.549668	-0.260827
cg14260632	37	1	84139163	LOC101927587	NR_119375	Body						0.742491	0.459291	-0.2832
cg02553170	37	1	84556762	PRKACB;PRKACB	NM_207578;NM_002731	Body;Body						0.878511	0.60241	-0.276101
cg07675216	37	1	84612187	PRKACB;PRKACB;PRKACB;PRKACB	NM_207578;NM_001300916;NM_002731;NM_182948	Body;Body;Body;Body						0.725146	0.447966	-0.27718
cg20434422	37	1	84831593	UOX	NR_003927	Body					TRUE	0.607751	0.236002	-0.371749
cg02457866	37	1	84900707									0.842095	0.525782	-0.316313
cg15228836	37	1	85438720	MCOLN2	NM_153259	Body						0.838004	0.572531	-0.265473
cg00522592	37	1	85457374	MCOLN2	NM_153259	Body				chr1:85457149-85457149		0.761914	0.486969	-0.274945
cg27183818	37	1	85764021								TRUE	0.745772	0.343783	-0.40199
cg10593400	37	1	86044176	DDAH1	NM_001134445	TSS200	chr1:86042229-86042935	S_Shore			TRUE	0.581014	0.31305	-0.267964
cg06325701	37	1	86932782									0.692678	0.374112	-0.318567
cg03614034	37	1	87783910									0.877469	0.568187	-0.309281
cg02992366	37	1	87868496							chr1:87868475-87868475		0.795239	0.507645	-0.287594
cg06533700	37	1	87979015								TRUE	0.830662	0.575512	-0.25515
cg11525404	37	1	88054230									0.454798	0.179963	-0.274835
cg24659527	37	1	88110738									0.47443	0.141686	-0.332744
cg06712674	37	1	88231424								TRUE	0.781825	0.419994	-0.361832
cg07480639	37	1	88330500									0.71827	0.411638	-0.306632
cg02376677	37	1	88335610									0.705975	0.452498	-0.253477
cg23381998	37	1	88867081									0.731228	0.425145	-0.306083
cg26156321	37	1	88921473								TRUE	0.617693	0.359459	-0.258235
cg27285720	37	1	89664782	GBP4	NM_052941	TSS200					TRUE	0.644443	0.320107	-0.324336
cg02205957	37	1	89737118	GBP5;GBP5	NM_001134486;NM_052942	5'UTR;5'UTR						0.714389	0.438392	-0.275996
cg24442506	37	1	89737833	GBP5;GBP5	NM_001134486;NM_052942	5'UTR;5'UTR						0.735368	0.277969	-0.457399
cg06881639	37	1	89752648							chr1:89752578-89752578		0.46564	0.115309	-0.35033
cg07136210	37	1	89765537									0.709341	0.331964	-0.377377
cg16440309	37	1	89776303							chr1:89776158-89776158		0.591964	0.250837	-0.341127
cg23279467	37	1	89777719							chr1:89777498-89777498		0.740253	0.443883	-0.29637
cg14799482	37	1	90135931	LRRC8C	NM_032270	5'UTR				chr1:90135818-90135818		0.527177	0.210989	-0.316188
cg13597043	37	1	90165225	LRRC8C	NM_032270	Body						0.890234	0.442547	-0.447687
cg11134825	37	1	90185796							chr1:90185639-90185639		0.699113	0.404939	-0.294175
cg18086643	37	1	90190309							chr1:90190139-90190139		0.525852	0.112859	-0.412994
cg17073989	37	1	90321453	LRRC8D;LRRC8D	NM_001134479;NM_018103	5'UTR;5'UTR				chr1:90321378-90321378		0.634311	0.304524	-0.329787
cg14841540	37	1	90427858								TRUE	0.723116	0.436387	-0.286729
cg24768835	37	1	91565690									0.751481	0.458296	-0.293185
cg01027305	37	1	92013964				chr1:92011829-92012062	S_Shore		chr1:92013932-92013932		0.876056	0.57641	-0.299646
cg12480547	37	1	92179222	TGFBR3;TGFBR3;TGFBR3;TGFBR3	NR_036634;NM_003243;NM_001195684;NM_001195683	Body;Body;Body;Body						0.373156	0.087841	-0.285315
cg12283040	37	1	92191269	TGFBR3;TGFBR3;TGFBR3;TGFBR3	NR_036634;NM_003243;NM_001195684;NM_001195683	Body;Body;Body;Body						0.76185	0.511086	-0.250763
cg23440142	37	1	92195799	TGFBR3;TGFBR3;TGFBR3;TGFBR3	NR_036634;NM_003243;NM_001195684;NM_001195683	Body;Body;Body;Body						0.781439	0.500913	-0.280526
cg01515515	37	1	92414295	BRDT	NM_207189	TSS1500	chr1:92414718-92414986	N_Shore			TRUE	0.588668	0.332622	-0.256046
cg14732540	37	1	92414722	BRDT	NM_207189	TSS1500	chr1:92414718-92414986	Island			TRUE	0.85926	0.608784	-0.250475
cg00903077	37	1	93288833									0.775335	0.484565	-0.29077
cg12632472	37	1	93419329	FAM69A;FAM69A;FAM69A;FAM69A	NM_001252273;NM_001252269;NM_001252270;NM_001006605	Body;Body;Body;Body						0.797173	0.379488	-0.417685
cg26646061	37	1	93441156									0.846999	0.582459	-0.26454
cg15925478	37	1	94081080	BCAR3	NM_003567	Body					TRUE	0.803127	0.356914	-0.446213
cg16375742	37	1	94169909	BCAR3	NM_001261408	5'UTR				chr1:94169670-94169670		0.697168	0.443921	-0.253246
cg07369620	37	1	94369895	GCLM;GCLM	NM_001308253;NM_002061	Body;Body						0.665419	0.375397	-0.290023
cg22475139	37	1	94558125	ABCA4	NM_000350	Body				chr1:94557832-94557832		0.560388	0.244861	-0.315527
cg14097568	37	1	94792942							chr1:94792807-94792807	TRUE	0.488834	0.226253	-0.262581
cg20335980	37	1	94795765									0.522561	0.195006	-0.327555
cg19258177	37	1	95056619								TRUE	0.861563	0.560734	-0.300829
cg09012411	37	1	95167783								TRUE	0.796438	0.538927	-0.257511
cg10140197	37	1	95186105	LINC01057	NR_104131	Body				chr1:95186012-95186012		0.840661	0.491602	-0.349059
cg04156841	37	1	95297451	SLC44A3;SLC44A3;SLC44A3;SLC44A3;SLC44A3;SLC44A3;SLC44A3	NM_001301079;NM_152369;NM_001258340;NM_001114106;NM_001258343;NM_001258342;NM_001258341	Body;Body;Body;Body;Body;Body;Body						0.873437	0.619501	-0.253936
cg14750274	37	1	95784934									0.730682	0.469582	-0.2611
cg23213375	37	1	98451791									0.599814	0.321686	-0.278128
cg02973930	37	1	98854360									0.505132	0.159541	-0.345591
cg16456816	37	1	99337082									0.667357	0.41493	-0.252427
cg19811961	37	1	99907345									0.366685	0.109217	-0.257468
cg12340301	37	1	100060046									0.795285	0.545097	-0.250188
cg18162957	37	1	100286306									0.585768	0.319598	-0.266169
cg13434874	37	1	100774435									0.650719	0.392638	-0.258081
cg23722588	37	1	100996682							chr1:100996437-100996437		0.739044	0.243434	-0.49561
cg16495532	37	1	101472258	DPH5;DPH5;DPH5	NM_001077394;NM_001077395;NM_015958	Body;Body;Body						0.741352	0.396297	-0.345055
cg17625218	37	1	101577815							chr1:101577594-101577594		0.745972	0.404849	-0.341122
cg11406453	37	1	101602562								TRUE	0.648697	0.320864	-0.327834
cg18164899	37	1	101744680									0.796604	0.451605	-0.344999
cg15730234	37	1	101759418									0.831219	0.526665	-0.304554
cg08386026	37	1	101776241							chr1:101776223-101776223		0.582961	0.291401	-0.29156
cg21023144	37	1	107360492									0.469687	0.197421	-0.272266
cg26628667	37	1	108329042	VAV3	NM_006113	Body				chr1:108329022-108329022		0.808367	0.530139	-0.278228
cg06885861	37	1	108329088	VAV3	NM_006113	Body				chr1:108329022-108329022		0.820292	0.489832	-0.33046
cg19381374	37	1	108440322	VAV3	NM_006113	Body						0.789811	0.539235	-0.250576
cg06217451	37	1	108622363									0.658767	0.36323	-0.295538
cg13980930	37	1	108650461							chr1:108650339-108650339		0.512292	0.247041	-0.265251
cg24362952	37	1	109189641							chr1:109189516-109189516		0.69208	0.297472	-0.394608
cg16365325	37	1	109395257	AKNAD1;AKNAD1	NR_049760;NM_152763	Body;Body						0.468275	0.11407	-0.354205
cg10601271	37	1	109981579							chr1:109981518-109981518		0.690175	0.293645	-0.39653
cg09372525	37	1	110035670	CYB561D1;CYB561D1;CYB561D1;CYB561D1;CYB561D1	NM_001134403;NM_182580;NM_001134402;NM_001134400;NM_001134404	TSS1500;TSS1500;TSS1500;TSS1500;TSS1500	chr1:110036545-110036943	N_Shore			TRUE	0.655733	0.402308	-0.253425
cg06870764	37	1	110333590							chr1:110333273-110333273		0.644492	0.31701	-0.327482
cg06265176	37	1	110339347									0.678688	0.392073	-0.286615
cg23528992	37	1	110429593							chr1:110429456-110429456		0.825142	0.570341	-0.254801
cg03429223	37	1	110438516									0.597793	0.249376	-0.348417
cg04905791	37	1	110438564									0.409241	0.115123	-0.294117
cg14407819	37	1	110477054									0.78558	0.435926	-0.349653
cg04489548	37	1	110616863				chr1:110610265-110613303	S_Shelf			TRUE	0.638811	0.364407	-0.274405
cg21830222	37	1	110626066				chr1:110626528-110627484	N_Shore			TRUE	0.585826	0.268108	-0.317718
cg01727273	37	1	111033881	CYMP;LOC440602	NR_003599;NR_108042	Body;TSS1500						0.825645	0.536352	-0.289293
cg16794139	37	1	111174123	KCNA2	NM_001204269	TSS200						0.78135	0.443902	-0.337448
cg07706695	37	1	111179008							chr1:111178912-111178912	TRUE	0.92568	0.650918	-0.274762
cg15022604	37	1	111329947							chr1:111329904-111329904		0.673601	0.319953	-0.353647
cg03043417	37	1	111415781	CD53;CD53;CD53	NM_000560;NM_001040033;NM_000560	1stExon;5'UTR;5'UTR			low-CpG:111217282-111217326		TRUE	0.609644	0.283725	-0.325919
cg17379806	37	1	111417489	CD53;CD53	NM_001040033;NM_000560	5'UTR;5'UTR				chr1:111417124-111417124		0.561135	0.236338	-0.324798
cg17240760	37	1	111417994	CD53;CD53	NM_001040033;NM_000560	5'UTR;5'UTR					TRUE	0.570087	0.310331	-0.259756
cg05816365	37	1	111758969							chr1:111758440-111758440		0.730259	0.395047	-0.335213
cg17633917	37	1	111764738							chr1:111764327-111764327		0.894315	0.591699	-0.302616
cg23068939	37	1	112016586	C1orf162	NM_174896	TSS200					TRUE	0.698543	0.436312	-0.262232
cg01083093	37	1	112019557	C1orf162	NM_174896	Body					TRUE	0.634681	0.320128	-0.314554
cg00179272	37	1	112050099	TMIGD3;TMIGD3	NM_001302680;NM_001081976	Body;Body				chr1:112050044-112050044		0.660021	0.272193	-0.387828
cg00035969	37	1	112159097				chr1:112162204-112162837	N_Shelf			TRUE	0.587568	0.299553	-0.288015
cg21806649	37	1	112171744	RAP1A;RAP1A;RAP1A	NM_001010935;NM_002884;NM_001291896	5'UTR;5'UTR;5'UTR						0.594108	0.341915	-0.252193
cg20127419	37	1	112289991	FAM212B-AS1;FAM212B-AS1;FAM212B;LOC101928718	NR_038952;NR_038951;NM_198926;NR_125963	Body;Body;Body;Body						0.804356	0.513176	-0.29118
cg09687597	37	1	112480010	KCND3;KCND3	NM_004980;NM_172198	Body;Body						0.603021	0.28766	-0.315361
cg26015149	37	1	112806173									0.599691	0.153092	-0.446599
cg04516337	37	1	112942287	CTTNBP2NL	NM_018704	5'UTR	chr1:112938495-112939113	S_Shelf		chr1:112942216-112942216		0.641558	0.379196	-0.262363
cg04818040	37	1	113086792	ST7L;ST7L;ST7L;ST7L;ST7L	NM_001308264;NM_138728;NM_138727;NM_017744;NM_138729	Body;Body;Body;Body;Body				chr1:113086746-113086746		0.577731	0.273977	-0.303755
cg21828233	37	1	113164672	CAPZA1	NM_006135	Body	chr1:113161591-113162571	S_Shelf			TRUE	0.544121	0.206513	-0.337607
cg26132229	37	1	113675885							chr1:113675675-113675675		0.831677	0.578016	-0.253661
cg10572465	37	1	114414042	PTPN22;PTPN22	NM_012411;NM_015967	Body;Body					TRUE	0.84424	0.557098	-0.287141
cg00916635	37	1	114414312	PTPN22;PTPN22;PTPN22;PTPN22	NM_012411;NM_012411;NM_015967;NM_015967	5'UTR;1stExon;5'UTR;1stExon					TRUE	0.688094	0.315419	-0.372675
cg14385738	37	1	114414340	PTPN22;PTPN22;PTPN22;PTPN22	NM_012411;NM_012411;NM_015967;NM_015967	5'UTR;1stExon;5'UTR;1stExon					TRUE	0.586131	0.281599	-0.304532
cg00041401	37	1	114414408	PTPN22;PTPN22	NM_012411;NM_015967	TSS200;TSS200					TRUE	0.496844	0.209895	-0.286949
cg06013042	37	1	114414532	PTPN22;PTPN22;PTPN22;PTPN22;AP4B1-AS1;AP4B1-AS1	NM_001193431;NM_001308297;NM_015967;NM_012411;NR_125965;NR_037864	TSS200;TSS200;TSS200;TSS200;Body;Body						0.704146	0.37139	-0.332756
cg18081760	37	1	114483597	HIPK1;HIPK1	NM_198268;NM_152696	Body;Body			low-CpG:114285117-114285158		TRUE	0.868661	0.579808	-0.288853
cg04633703	37	1	115685835									0.744388	0.455446	-0.288942
cg03524264	37	1	115839827	NGF	NM_002506	5'UTR						0.826838	0.575348	-0.25149
cg04082532	37	1	115840767	NGF	NM_002506	5'UTR						0.878318	0.596464	-0.281855
cg14445917	37	1	115969113							chr1:115968975-115968975		0.416137	0.0948002	-0.321337
cg00681997	37	1	116035580									0.861985	0.595632	-0.266352
cg17033499	37	1	116044436								TRUE	0.828542	0.52596	-0.302582
cg18199741	37	1	116049438									0.572389	0.320285	-0.252105
cg25773695	37	1	116191657	VANGL1	NM_138959	5'UTR					TRUE	0.803425	0.49023	-0.313195
cg21554180	37	1	116272679	CASQ2	NM_001232	Body						0.784989	0.502746	-0.282243
cg05190718	37	1	116310712	CASQ2	NM_001232	Body					TRUE	0.805336	0.529764	-0.275572
cg05661786	37	1	116312729	CASQ2	NM_001232	TSS1500						0.870149	0.580494	-0.289656
cg12609063	37	1	116549227	SLC22A15	NM_018420	Body					TRUE	0.867062	0.533162	-0.3339
cg26422330	37	1	116829087									0.83168	0.578872	-0.252808
cg10058228	37	1	116899488									0.685949	0.407028	-0.278921
cg12668782	37	1	116923471	ATP1A1;ATP1A1	NM_001160233;NM_000701	Body;Body				chr1:116923407-116923407		0.734047	0.481464	-0.252583
cg00389614	37	1	117046471							chr1:117046366-117046366		0.862635	0.473752	-0.388882
cg14166209	37	1	117047015								TRUE	0.809801	0.456913	-0.352888
cg00442621	37	1	117047624									0.797672	0.407586	-0.390086
cg10180415	37	1	117057968	CD58;CD58	NM_001779;NR_026665	Body;Body					TRUE	0.64163	0.390169	-0.251462
cg26118759	37	1	117058474	CD58;CD58	NM_001779;NR_026665	Body;Body					TRUE	0.878169	0.549381	-0.328788
cg07892451	37	1	117298829	CD2	NM_001767	Body						0.8682	0.585018	-0.283182
cg05048982	37	1	117301208	CD2	NM_001767	Body						0.872694	0.606136	-0.266559
cg11131037	37	1	117306044	CD2	NM_001767	Body				chr1:117305811-117305811		0.732284	0.393304	-0.33898
cg16483188	37	1	117306469	CD2	NM_001767	Body				chr1:117305811-117305811		0.893973	0.614639	-0.279334
cg09018746	37	1	117312085									0.683208	0.321845	-0.361363
cg24014001	37	1	117312452									0.668553	0.306528	-0.362025
cg03417346	37	1	117347527							chr1:117347522-117347522		0.807396	0.508209	-0.299187
cg04850538	37	1	117359192							chr1:117359174-117359174		0.877702	0.562532	-0.31517
cg12682228	37	1	117390624									0.530747	0.180718	-0.350029
cg08058560	37	1	117544206	CD101	NM_004258	TSS200					TRUE	0.898265	0.586908	-0.311357
cg23953831	37	1	117544416	CD101;CD101	NM_004258;NM_004258	5'UTR;1stExon					TRUE	0.739263	0.437872	-0.301391
cg03037393	37	1	118201570							chr1:118201472-118201472		0.745618	0.450549	-0.295069
cg26218460	37	1	118207082							chr1:118206889-118206889		0.886581	0.583751	-0.30283
cg11675098	37	1	118356683								TRUE	0.850535	0.58143	-0.269105
cg11341280	37	1	118744215									0.484158	0.198843	-0.285315
cg09789768	37	1	119524323	TBX15	NM_152380	5'UTR	chr1:119522385-119522638	S_Shore			TRUE	0.492169	0.231048	-0.261121
cg08611752	37	1	120049154	HSD3B1	NM_000862	TSS1500						0.773664	0.515652	-0.258012
cg05606994	37	1	120112712	HSD3BP4	NR_033781	Body						0.758022	0.445869	-0.312152
cg01893993	37	1	120685271									0.776964	0.45839	-0.318574
cg25479256	37	1	120751884									0.882097	0.613862	-0.268235
cg21114713	37	1	121200727									0.45117	0.16537	-0.285799
cg26671477	37	1	121258490				chr1:121260857-121261525	N_Shelf			TRUE	0.802992	0.376909	-0.426083
cg06637800	37	1	144000569									0.864755	0.590494	-0.274261
cg27614959	37	1	144908117	PDE4DIP;PDE4DIP;PDE4DIP;PDE4DIP;PDE4DIP;NBPF20;NBPF9	NM_001002811;NM_001198834;NM_014644;NM_001198832;NM_001002812;NM_001278267;NM_001277444	Body;Body;Body;Body;Body;Body;Body						0.563152	0.289835	-0.273318
cg01547289	37	1	145090353	NBPF20;NBPF9	NM_001278267;NM_001277444	Body;Body				chr1:145090155-145090155		0.779504	0.522318	-0.257186
cg07100648	37	1	145130240	NBPF20;NBPF9	NM_001278267;NM_001277444	Body;Body						0.737359	0.421024	-0.316335
cg01974370	37	1	145454817	NBPF20;NBPF10;NBPF10	NM_001278267;NM_001039703;NM_001302371	Body;Body;Body				chr1:145454760-145454760		0.424047	0.128039	-0.296008
cg10798745	37	1	145715636	CD160	NM_007053	TSS200	chr1:145713966-145714203	S_Shore			TRUE	0.865597	0.572439	-0.293158
cg13324406	37	1	146742917	CHD1L;CHD1L;CHD1L;CHD1L;CHD1L;CHD1L	NR_046070;NM_004284;NM_001256338;NM_001256336;NM_024568;NM_001256337	Body;Body;Body;Body;Body;Body						0.903793	0.377235	-0.526558
cg02070740	37	1	146763914	CHD1L	NM_004284	Body					TRUE	0.739312	0.437923	-0.301389
cg14792357	37	1	147041822	BCL9	NM_004326	5'UTR						0.898345	0.60248	-0.295865
cg05192497	37	1	147052131	BCL9	NM_004326	5'UTR						0.642499	0.272411	-0.370089
cg25700293	37	1	147399574	GPR89B	NM_016334	TSS1500	chr1:147400354-147401087	N_Shore				0.900243	0.631926	-0.268318
cg18033041	37	1	147766089	NBPF8;NBPF8;NBPF8	NR_102405;NR_102404;NM_001037501	Body;Body;Body						0.622251	0.296262	-0.325989
cg16815229	37	1	149969689	OTUD7B	NM_020205	5'UTR						0.731397	0.454845	-0.276551
cg05751439	37	1	150064398	VPS45;VPS45;VPS45;VPS45;VPS45;VPS45;VPS45;VPS45;VPS45;VPS45	NM_001279355;NM_007259;NM_001279354;NM_001279353;NR_103998;NR_103998;NM_001279355;NM_007259;NM_001279354;NM_001279353	ExonBnd;ExonBnd;ExonBnd;ExonBnd;ExonBnd;Body;Body;Body;Body;Body						0.805349	0.501342	-0.304007
cg20785674	37	1	150123490	PLEKHO1	NM_016274	Body	chr1:150121695-150123078	S_Shore			TRUE	0.332446	0.0707877	-0.261658
cg23369564	37	1	150123734	PLEKHO1	NM_016274	Body	chr1:150121695-150123078	S_Shore			TRUE	0.571527	0.293647	-0.27788
cg20611253	37	1	150743628									0.656862	0.363821	-0.293041
cg04075487	37	1	150971753	FAM63A;FAM63A;FAM63A;FAM63A;FAM63A	NM_001163260;NM_001040217;NM_001163259;NM_018379;NM_001163258	Body;Body;Body;Body;Body						0.687531	0.283367	-0.404164
cg21937128	37	1	150971889	FAM63A;FAM63A;FAM63A;FAM63A;FAM63A	NM_001163258;NM_018379;NM_001040217;NM_001163260;NM_001163259	Body;Body;Body;Body;Body					TRUE	0.915558	0.665355	-0.250202
cg18660898	37	1	151030968	CDC42SE1;CDC42SE1;MLLT11	NM_001038707;NM_020239;NM_006818	5'UTR;5'UTR;TSS1500	chr1:151031767-151032352	N_Shore			TRUE	0.387051	0.133762	-0.253289
cg06454388	37	1	151072426	GABPB2	NM_144618	Body						0.594492	0.340462	-0.254029
cg23612220	37	1	151129298	TNFAIP8L2	NM_024575	5'UTR					TRUE	0.917824	0.609404	-0.30842
cg01903374	37	1	151129844	TNFAIP8L2	NM_024575	5'UTR					TRUE	0.815809	0.532353	-0.283457
cg25452110	37	1	151626910	SNX27	NM_030918	Body						0.622133	0.222319	-0.399814
cg24158160	37	1	151693222	C1orf230	NM_001144956	TSS1500	chr1:151693991-151694282	N_Shore			TRUE	0.562744	0.289744	-0.273001
cg25206113	37	1	151788262	RORC;RORC	NM_001001523;NM_005060	Body;Body						0.778197	0.439251	-0.338946
cg13869942	37	1	151878061	THEM4	NM_053055	Body	chr1:151881763-151882407	N_Shelf			TRUE	0.614074	0.222904	-0.391171
cg02544004	37	1	152043978									0.79279	0.506709	-0.286081
cg19400001	37	1	152089089	TCHH	NM_007113	TSS1500	chr1:152084994-152085215	S_Shelf				0.63092	0.344852	-0.286068
cg06346150	37	1	152093622									0.664164	0.407001	-0.257163
cg10500702	37	1	152299041	FLG	NM_002016	TSS1500					TRUE	0.834728	0.58261	-0.252118
cg03957898	37	1	152333423	FLG2	NM_001014342	TSS1500					TRUE	0.81743	0.53859	-0.278839
cg24034105	37	1	152482580	LCE5A	NM_178438	TSS1500						0.609692	0.359534	-0.250157
cg25686513	37	1	152636262	LCE2D	NM_178430	5'UTR						0.681448	0.364412	-0.317036
cg22616525	37	1	152669985	LCE2A	NM_178428	TSS1500					TRUE	0.698198	0.444147	-0.254051
cg13153264	37	1	152680502	LCE4A	NM_178356	TSS1500						0.695639	0.443413	-0.252226
cg04221650	37	1	152681887	LCE4A;LCE4A	NM_178356;NM_178356	1stExon;3'UTR					TRUE	0.773329	0.51455	-0.258779
cg16011217	37	1	152777382	LCE1C	NM_178351	3'UTR					TRUE	0.81351	0.527744	-0.285766
cg16265542	37	1	152814831	LCE6A	NM_001128600	TSS1500					TRUE	0.575824	0.275868	-0.299957
cg18906971	37	1	152884061	IVL	NM_005547	3'UTR						0.757948	0.507485	-0.250462
cg05066693	37	1	152941145									0.644047	0.375491	-0.268555
cg09902062	37	1	152944334	SPRR4	NM_173080	5'UTR					TRUE	0.83658	0.57473	-0.26185
cg06101324	37	1	152955543	SPRR1A	NM_005987	TSS1500					TRUE	0.528766	0.26095	-0.267816
cg25856811	37	1	152973957	SPRR3;SPRR3	NM_001097589;NM_005416	TSS1500;TSS1500					TRUE	0.675339	0.401407	-0.273932
cg03449150	37	1	153085649	SPRR2F	NM_001014450	5'UTR					TRUE	0.755884	0.459217	-0.296666
cg07804289	37	1	153114690	SPRR2C	NR_003062	TSS1500					TRUE	0.808776	0.517016	-0.291761
cg09581452	37	1	153124255	SPRR2G	NM_001014291	TSS1500						0.784509	0.534216	-0.250293
cg03924662	37	1	153145594	LOC101928009	NR_110685	TSS1500						0.678469	0.37602	-0.302449
cg00811275	37	1	153146364	LOC101928009	NR_110685	TSS1500						0.862152	0.599405	-0.262747
cg10008950	37	1	153358924							chr1:153358841-153358841		0.796389	0.498404	-0.297985
cg21696975	37	1	153391644	S100A7A	NM_176823	Body					TRUE	0.801873	0.532743	-0.26913
cg00444915	37	1	153571425									0.401169	0.119237	-0.281932
cg20555284	37	1	153861258	GATAD2B	NM_020699	5'UTR						0.57749	0.249756	-0.327734
cg12246990	37	1	154121378	NUP210L;NUP210L	NM_001159484;NM_207308	Body;Body						0.713213	0.419517	-0.293696
cg12205230	37	1	154164951	TPM3	NM_152263	TSS1500					TRUE	0.687665	0.354731	-0.332934
cg13796884	37	1	154417817	IL6R;IL6R	NM_181359;NM_000565	Body;Body						0.767884	0.451808	-0.316076
cg15633035	37	1	154439516	IL6R;IL6R	NM_000565;NM_181359	3'UTR;3'UTR					TRUE	0.625308	0.330625	-0.294683
cg04312783	37	1	154514331	TDRD10;TDRD10	NM_001098475;NM_182499	Body;Body						0.826478	0.434843	-0.391635
cg17218026	37	1	154582156	ADAR;ADAR;ADAR;ADAR	NM_001025107;NM_001111;NM_015841;NM_015840	5'UTR;TSS1500;TSS1500;TSS1500	chr1:154580380-154580797	S_Shore		chr1:154582047-154582047	TRUE	0.895165	0.643819	-0.251346
cg05343739	37	1	154731938	KCNN3;KCNN3	NM_002249;NM_170782	Body;Body	chr1:154732822-154733436	N_Shore		chr1:154731745-154731745	TRUE	0.643997	0.303185	-0.340812
cg08005692	37	1	155506056	ASH1L	NM_018489	5'UTR					TRUE	0.759078	0.323448	-0.43563
cg13344137	37	1	155946122	ARHGEF2;ARHGEF2;ARHGEF2	NM_001162384;NM_001162383;NM_004723	Body;Body;5'UTR	chr1:155947678-155948490	N_Shore		chr1:155945743-155945743		0.35101	0.0795965	-0.271414
cg20685713	37	1	156066986							chr1:156066868-156066868	TRUE	0.428171	0.148162	-0.280009
cg00202522	37	1	156127527	SEMA4A;SEMA4A;SEMA4A;SEMA4A	NM_001193301;NM_001193300;NM_022367;NM_001193302	Body;Body;Body;Body						0.826585	0.548707	-0.277877
cg02488934	37	1	156422580				chr1:156426549-156427362	N_Shelf			TRUE	0.695796	0.409871	-0.285925
cg08123045	37	1	156467188	MEF2D	NM_005920	5'UTR	chr1:156469617-156471060	N_Shelf			TRUE	0.579734	0.313029	-0.266705
cg26568180	37	1	156634894							chr1:156634807-156634807		0.524532	0.268614	-0.255918
cg07665458	37	1	156786723	SH2D2A;SH2D2A;SH2D2A;SH2D2A;SH2D2A;NTRK1	NM_001161443;NM_003975;NM_001161444;NM_001161442;NM_001161441;NM_001007792	TSS1500;TSS200;TSS200;TSS200;TSS200;Body	chr1:156783523-156784037	S_Shelf				0.835454	0.526251	-0.309203
cg08660955	37	1	156868294	PEAR1	NM_001080471	5'UTR						0.547467	0.280362	-0.267105
cg07208467	37	1	157154442									0.801282	0.512682	-0.2886
cg21687740	37	1	157164556				chr1:157164538-157165135	Island			TRUE	0.589898	0.33222	-0.257678
cg20683960	37	1	157272837									0.800727	0.523291	-0.277436
cg16820660	37	1	157339581									0.542461	0.269645	-0.272816
cg10285992	37	1	157369614									0.861985	0.579625	-0.28236
cg15230074	37	1	157465352									0.881516	0.582289	-0.299227
cg25259754	37	1	157670220	FCRL3	NM_052939	Body					TRUE	0.71871	0.441991	-0.276719
cg17134153	37	1	157670328	FCRL3	NM_052939	5'UTR					TRUE	0.68826	0.405236	-0.283025
cg01045635	37	1	157670481	FCRL3;FCRL3	NM_052939;NM_052939	5'UTR;1stExon						0.868549	0.584869	-0.28368
cg08786003	37	1	157670710	FCRL3	NM_052939	TSS200					TRUE	0.854014	0.520809	-0.333205
cg15779950	37	1	157789892	FCRL1;FCRL1;FCRL1;FCRL1;FCRL1;FCRL1	NM_001159398;NM_001159397;NM_052938;NM_001159398;NM_001159397;NM_052938	1stExon;1stExon;1stExon;5'UTR;5'UTR;5'UTR						0.590738	0.33659	-0.254148
cg05766896	37	1	157789933	FCRL1;FCRL1;FCRL1;FCRL1;FCRL1;FCRL1	NM_052938;NM_001159397;NM_001159398;NM_001159398;NM_001159397;NM_052938	5'UTR;5'UTR;1stExon;5'UTR;1stExon;1stExon					TRUE	0.871349	0.588159	-0.28319
cg06505156	37	1	157947113				chr1:157948720-157949053	N_Shore				0.916818	0.541259	-0.375559
cg07377195	37	1	158174399									0.590966	0.330349	-0.260617
cg15423654	37	1	158217942							chr1:158217835-158217835		0.691915	0.336485	-0.35543
cg16993682	37	1	158259268	CD1C	NM_001765	TSS1500					TRUE	0.596335	0.341573	-0.254762
cg06930511	37	1	158260162	CD1C	NM_001765	Body						0.780306	0.52267	-0.257636
cg25322986	37	1	158549420	OR10X1	NM_001004477	1stExon						0.885384	0.394777	-0.490608
cg14275423	37	1	158656484	SPTA1;SPTA1	NM_003126;NM_003126	1stExon;5'UTR						0.754561	0.363182	-0.391378
cg22730004	37	1	158656718	SPTA1	NM_003126	TSS1500					TRUE	0.612498	0.333523	-0.278975
cg05304729	37	1	158800024	MNDA	NM_002432	TSS1500					TRUE	0.57794	0.310633	-0.267307
cg26246880	37	1	158900549	PYHIN1;PYHIN1;PYHIN1;PYHIN1	NM_198930;NM_198929;NM_152501;NM_198928	TSS1500;TSS1500;TSS1500;TSS1500					TRUE	0.657077	0.384351	-0.272726
cg15036529	37	1	158900644	PYHIN1;PYHIN1;PYHIN1;PYHIN1	NM_198930;NM_198929;NM_152501;NM_198928	TSS1500;TSS1500;TSS1500;TSS1500					TRUE	0.879768	0.608549	-0.271218
cg04805131	37	1	158978812	IFI16;IFI16	NM_001206567;NM_005531	TSS1500;TSS1500						0.496603	0.192762	-0.303841
cg00490406	37	1	159046773	AIM2	NM_004833	TSS200					TRUE	0.614121	0.236536	-0.377584
cg07195224	37	1	159047034	AIM2	NM_004833	TSS1500					TRUE	0.542427	0.236968	-0.305459
cg17515347	37	1	159047163	AIM2	NM_004833	TSS1500					TRUE	0.777467	0.508915	-0.268553
cg24145401	37	1	159047177	AIM2	NM_004833	TSS1500						0.859292	0.523385	-0.335907
cg22603452	37	1	159270054	FCER1A	NM_002001	5'UTR				chr1:159270044-159270044		0.523558	0.247743	-0.275815
cg21725986	37	1	159770253	FCRL6	NM_001284217	TSS200						0.689321	0.42416	-0.265161
cg22318959	37	1	159770368	FCRL6;FCRL6	NM_001284217;NM_001284217	5'UTR;1stExon						0.858106	0.568338	-0.289768
cg21598751	37	1	159791473									0.86608	0.611157	-0.254923
cg13406559	37	1	159796307	SLAMF8	NM_020125	TSS200						0.54043	0.252687	-0.287743
cg27198652	37	1	159928680									0.943283	0.677792	-0.265491
cg07204658	37	1	160139687	ATP1A4	NM_144699	Body						0.794538	0.375839	-0.418698
cg21829783	37	1	160493089	SLAMF6	NM_052931	TSS200					TRUE	0.624933	0.372331	-0.252601
cg27444375	37	1	160510176							chr1:160510042-160510042		0.63776	0.280134	-0.357626
cg23445301	37	1	160537944	CD84;CD84;CD84;CD84	NM_003874;NM_001184882;NM_001184879;NM_001184881	Body;Body;Body;Body				chr1:160537909-160537909		0.48645	0.211515	-0.274935
cg10281249	37	1	160546979	CD84;CD84;CD84;CD84	NM_003874;NM_001184882;NM_001184879;NM_001184881	Body;Body;Body;Body				chr1:160546747-160546747		0.846364	0.488145	-0.358219
cg08747153	37	1	160548297	CD84;CD84;CD84;CD84	NM_003874;NM_001184882;NM_001184879;NM_001184881	Body;Body;Body;Body						0.762414	0.471266	-0.291148
cg24652786	37	1	160615240	SLAMF1;SLAMF1;SLAMF1;SLAMF1	NR_104399;NR_104401;NR_104400;NM_003037	Body;Body;Body;Body				chr1:160615019-160615019		0.913279	0.659925	-0.253354
cg20535085	37	1	160616604	SLAMF1	NM_003037	Body					TRUE	0.884804	0.58565	-0.299154
cg03950000	37	1	160617327	SLAMF1	NM_003037	TSS1500					TRUE	0.80622	0.509827	-0.296393
cg21920303	37	1	160617356	SLAMF1	NM_003037	TSS1500					TRUE	0.762868	0.495085	-0.267783
cg20868817	37	1	160677398	CD48	NM_001778	Body					TRUE	0.599474	0.232758	-0.366716
cg12701013	37	1	160678921	CD48;CD48	NM_001778;NM_001256030	Body;Body				chr1:160677742-160677742		0.688539	0.366643	-0.321896
cg10140148	37	1	160678957	CD48;CD48	NM_001778;NM_001256030	Body;Body				chr1:160677742-160677742		0.775602	0.457869	-0.317733
cg15108521	37	1	160680856	CD48;CD48	NM_001778;NM_001256030	Body;Body				chr1:160680775-160680775		0.840949	0.459457	-0.381492
cg13311440	37	1	160681404	CD48	NM_001778	Body					TRUE	0.77669	0.418898	-0.357791
cg05200628	37	1	160681760	CD48	NM_001778	TSS200					TRUE	0.630223	0.312637	-0.317586
cg27625552	37	1	160681897	CD48;CD48	NM_001256030;NM_001778	TSS1500;TSS1500						0.582842	0.212953	-0.369889
cg24342146	37	1	160682008	CD48	NM_001778	TSS1500					TRUE	0.612481	0.242082	-0.370399
cg24154340	37	1	160682655	CD48	NM_001778	TSS1500				chr1:160682568-160682568	TRUE	0.623402	0.345545	-0.277857
cg25199836	37	1	160683107	CD48;CD48	NM_001256030;NM_001778	TSS1500;TSS1500						0.580552	0.295763	-0.284789
cg10135540	37	1	160711549	SLAMF7;SLAMF7;SLAMF7;SLAMF7;SLAMF7;SLAMF7;SLAMF7;SLAMF7;SLAMF7;SLAMF7	NM_001282595;NM_001282588;NM_001282593;NM_001282592;NM_001282596;NM_021181;NM_001282590;NM_001282589;NM_001282594;NM_001282591	5'UTR;Body;Body;Body;Body;Body;Body;Body;Body;Body				chr1:160711095-160711095		0.839524	0.588052	-0.251473
cg00045592	37	1	160714299	SLAMF7;SLAMF7;SLAMF7;SLAMF7;SLAMF7;SLAMF7;SLAMF7;SLAMF7;SLAMF7;SLAMF7	NM_001282595;NM_001282588;NM_001282593;NM_001282592;NM_001282596;NM_021181;NM_001282590;NM_001282589;NM_001282594;NM_001282591	5'UTR;Body;Body;Body;Body;Body;Body;Body;Body;Body				chr1:160714037-160714037		0.658089	0.385768	-0.272321
cg04009575	37	1	160714382	SLAMF7;SLAMF7;SLAMF7;SLAMF7;SLAMF7;SLAMF7;SLAMF7;SLAMF7;SLAMF7;SLAMF7	NM_001282595;NM_001282588;NM_001282593;NM_001282592;NM_001282596;NM_021181;NM_001282590;NM_001282589;NM_001282594;NM_001282591	5'UTR;Body;Body;Body;Body;Body;Body;Body;Body;Body				chr1:160714037-160714037		0.851443	0.500817	-0.350625
cg12831026	37	1	160752312									0.850362	0.576175	-0.274187
cg01367992	37	1	160766535	LY9;LY9	NM_001033667;NM_002348	Body;Body					TRUE	0.860987	0.564131	-0.296856
cg17283691	37	1	160807410	CD244;CD244;CD244	NM_001166664;NM_001166663;NM_016382	Body;Body;Body				chr1:160807359-160807359		0.637442	0.344713	-0.292729
cg14446827	37	1	160825797	CD244;CD244;CD244	NM_001166664;NM_001166663;NM_016382	Body;Body;Body						0.782424	0.504238	-0.278185
cg03089651	37	1	161039695	ARHGAP30;ARHGAP30;ARHGAP30;ARHGAP30	NM_181720;NM_001025598;NM_181720;NM_001025598	1stExon;5'UTR;5'UTR;1stExon			low-CpG:159305854-159306397		TRUE	0.720238	0.413376	-0.306862
cg20368967	37	1	161154045									0.626308	0.340689	-0.285619
cg01094172	37	1	161155964							chr1:161155908-161155908		0.467331	0.132774	-0.334557
cg05776323	37	1	161165053	ADAMTS4	NM_005099	Body						0.504298	0.225095	-0.279203
cg13080267	37	1	161699921				chr1:161695637-161697298	S_Shelf				0.571004	0.295442	-0.275561
cg11141696	37	1	161700167				chr1:161695637-161697298	S_Shelf			TRUE	0.851351	0.465484	-0.385868
cg23839599	37	1	161708999									0.852154	0.594901	-0.257253
cg08443279	37	1	161996741				chr1:161993022-161994131	S_Shelf		chr1:161996651-161996651		0.72146	0.449367	-0.272093
cg14383952	37	1	162205449	NOS1AP;NOS1AP	NM_014697;NM_001164757	Body;Body						0.605097	0.340069	-0.265028
cg02384491	37	1	162307064	NOS1AP;NOS1AP	NM_014697;NM_001164757	Body;Body						0.845867	0.560235	-0.285633
cg12196720	37	1	162307228	NOS1AP;NOS1AP	NM_014697;NM_001164757	Body;Body						0.798018	0.491189	-0.30683
cg00965617	37	1	162328124	NOS1AP;NOS1AP	NM_014697;NM_001164757	Body;Body						0.817925	0.546663	-0.271262
cg03268699	37	1	162331801	NOS1AP;NOS1AP;NOS1AP	NM_001126060;NM_014697;NM_001164757	TSS1500;Body;Body						0.862159	0.572855	-0.289304
cg21501207	37	1	162383000	SH2D1B	NM_053282	TSS1500						0.690788	0.379694	-0.311095
cg06664095	37	1	162897858									0.46337	0.195606	-0.267764
cg23844705	37	1	164573835	PBX1;PBX1;PBX1	NM_001204961;NM_002585;NM_001204963	Body;Body;Body						0.83433	0.571528	-0.262803
cg22361413	37	1	164689630	PBX1	NM_002585	Body					TRUE	0.714964	0.344337	-0.370627
cg26680678	37	1	164689999	PBX1;PBX1;PBX1	NM_001204961;NM_002585;NM_001204963	Body;Body;Body						0.745467	0.465782	-0.279684
cg03760040	37	1	165250694	LMX1A;LMX1A	NM_177398;NM_001174069	Body;Body						0.633427	0.379017	-0.25441
cg23971170	37	1	165326269	LMX1A	NM_177398	TSS1500	chr1:165324191-165326328	Island			TRUE	0.78766	0.53751	-0.25015
cg02361878	37	1	165326327	LMX1A	NM_177398	TSS1500	chr1:165324191-165326328	Island			TRUE	0.713281	0.441534	-0.271747
cg23739048	37	1	165393661	RXRG;RXRG;RXRG	NM_001256571;NM_006917;NM_001256570	5'UTR;Body;5'UTR						0.539374	0.255789	-0.283586
cg14172009	37	1	165497185	LOC400794	NR_026744	Body						0.794349	0.527592	-0.266757
cg06252523	37	1	165840711	UCK2	NM_012474	Body						0.682892	0.220026	-0.462866
cg01674556	37	1	166050377	FAM78B	NM_001017961	Body						0.512626	0.143756	-0.36887
cg26557890	37	1	166050477	FAM78B	NM_001017961	Body						0.561416	0.278499	-0.282917
cg04912784	37	1	166877200									0.442712	0.167486	-0.275226
cg07623696	37	1	167487060	CD247;CD247	NM_000734;NM_198053	Body;Body						0.893247	0.627642	-0.265605
cg05799811	37	1	167487396	CD247;CD247	NM_198053;NM_000734	Body;Body					TRUE	0.756312	0.433933	-0.322379
cg00361159	37	1	167487871	CD247;CD247	NM_000734;NM_198053	TSS200;TSS200						0.751258	0.473666	-0.277591
cg26612821	37	1	167586938							chr1:167586596-167586596	TRUE	0.535579	0.245043	-0.290536
cg12336540	37	1	167598993	RCSD1	NM_052862	TSS1500	chr1:167599464-167599839	N_Shore			TRUE	0.572245	0.310075	-0.26217
cg04259326	37	1	167599124	RCSD1	NM_052862	TSS1500	chr1:167599464-167599839	N_Shore			TRUE	0.420818	0.161032	-0.259786
cg25765104	37	1	167601275	RCSD1	NM_052862	Body	chr1:167599464-167599839	S_Shore			TRUE	0.862825	0.486359	-0.376466
cg09755770	37	1	167601285	RCSD1	NM_052862	Body	chr1:167599464-167599839	S_Shore				0.841259	0.522493	-0.318765
cg02832237	37	1	167607232	RCSD1	NM_052862	Body						0.83056	0.577298	-0.253262
cg07012484	37	1	167619748	RCSD1	NM_052862	Body					TRUE	0.537534	0.222503	-0.315031
cg14866108	37	1	167678305									0.683246	0.399922	-0.283324
cg00994207	37	1	167774542									0.782961	0.508621	-0.27434
cg26841311	37	1	168118258									0.674079	0.295866	-0.378213
cg04337672	37	1	168437029	LOC101928565	NR_125956	Body						0.730155	0.323374	-0.406782
cg23541265	37	1	168487654									0.881484	0.492241	-0.389243
cg12695519	37	1	168504989							chr1:168504922-168504922		0.718453	0.326025	-0.392428
cg24220948	37	1	168527152									0.803475	0.412619	-0.390856
cg05409165	37	1	168725412									0.823933	0.410126	-0.413807
cg21342350	37	1	169281590	NME7;NME7;NME7	NR_104229;NM_197972;NM_013330	Body;Body;Body						0.665573	0.294273	-0.3713
cg08150816	37	1	169281716	NME7;NME7;NME7	NR_104229;NM_197972;NM_013330	Body;Body;Body						0.779897	0.435597	-0.3443
cg11574793	37	1	169667161	SELL;SELL	NR_029467;NM_000655	Body;Body						0.875604	0.543342	-0.332261
cg15931030	37	1	169668322	SELL;SELL	NR_029467;NM_000655	Body;Body						0.778542	0.453715	-0.324826
cg01158456	37	1	169677921	SELL;SELL	NR_029467;NM_000655	Body;Body						0.813098	0.506567	-0.306532
cg25042939	37	1	170217399									0.491431	0.150351	-0.34108
cg20479035	37	1	170635122	PRRX1;PRRX1	NM_006902;NM_022716	Body;Body	chr1:170633274-170634178	S_Shore		chr1:170635008-170635008		0.501716	0.237051	-0.264665
cg20826576	37	1	170636223	PRRX1;PRRX1	NM_022716;NM_006902	Body;Body	chr1:170633274-170634178	S_Shelf			TRUE	0.540167	0.257937	-0.28223
cg26669793	37	1	170637600	PRRX1;PRRX1	NM_022716;NM_006902	Body;Body	chr1:170633274-170634178	S_Shelf			TRUE	0.598683	0.179724	-0.41896
cg02897989	37	1	170637723	PRRX1;PRRX1	NM_022716;NM_006902	Body;Body	chr1:170633274-170634178	S_Shelf		chr1:170637621-170637621	TRUE	0.383257	0.0846093	-0.298647
cg22371492	37	1	170637796	PRRX1;PRRX1	NM_022716;NM_006902	Body;Body	chr1:170633274-170634178	S_Shelf			TRUE	0.733845	0.375792	-0.358053
cg11954332	37	1	170639289	PRRX1;PRRX1	NM_022716;NM_006902	Body;Body					TRUE	0.558361	0.213459	-0.344902
cg22004053	37	1	170758474									0.820324	0.55615	-0.264174
cg03808421	37	1	170842070									0.686939	0.415805	-0.271134
cg03458344	37	1	170964477	C1orf129;C1orf129	NM_001163629;NM_025063	Body;Body					TRUE	0.802394	0.536565	-0.265829
cg05376227	37	1	171111193	FMO6P	NR_002601	Body					TRUE	0.590969	0.326893	-0.264076
cg03322057	37	1	172114419	DNM3;DNM3;MIR199A2	NM_015569;NM_001136127;NR_029618	Body;Body;TSS1500					TRUE	0.560002	0.289712	-0.27029
cg15158366	37	1	172612842									0.624824	0.298493	-0.326331
cg14900902	37	1	172616593									0.920424	0.651861	-0.268563
cg06983746	37	1	172628065	FASLG	NM_000639	TSS200					TRUE	0.813386	0.559775	-0.253611
cg27056253	37	1	172668586									0.797979	0.421049	-0.37693
cg09221888	37	1	172715611							chr1:172715484-172715484		0.54202	0.12846	-0.41356
cg10669585	37	1	172750921									0.79719	0.491224	-0.305966
cg06616903	37	1	172788029							chr1:172788027-172788027		0.651372	0.338377	-0.312995
cg09021952	37	1	172852813								TRUE	0.74481	0.428159	-0.31665
cg18234224	37	1	172917851							chr1:172917653-172917653	TRUE	0.868981	0.604571	-0.26441
cg04924453	37	1	172987127									0.378605	0.116998	-0.261606
cg03555986	37	1	173017917	TNFSF18	NM_005092	Body						0.748238	0.457485	-0.290753
cg08919180	37	1	173174650	TNFSF4;TNFSF4;TNFSF4	NM_001297562;NM_001297562;NM_003326	1stExon;5'UTR;Body						0.4044	0.148509	-0.255892
cg21634535	37	1	173174915	TNFSF4;TNFSF4	NM_001297562;NM_003326	TSS1500;Body						0.804575	0.528968	-0.275607
cg11301253	37	1	173174920	TNFSF4;TNFSF4	NM_001297562;NM_003326	TSS1500;Body						0.838273	0.50064	-0.337633
cg03137972	37	1	173380251	LOC100506023	NR_037845	Body				chr1:173379915-173379915		0.85058	0.52843	-0.32215
cg18622049	37	1	174756086	RABGAP1L	NM_014857	Body						0.927376	0.676241	-0.251135
cg05643339	37	1	175036687	TNN	NM_022093	TSS1500					TRUE	0.672935	0.402924	-0.270012
cg11118147	37	1	175178551									0.728661	0.398352	-0.330308
cg07641530	37	1	175796062									0.856036	0.580141	-0.275895
cg09763729	37	1	176796290	PAPPA2	NM_020318	Body						0.848301	0.573728	-0.274573
cg16466799	37	1	177779225									0.796983	0.524208	-0.272775
cg27542729	37	1	177850564								TRUE	0.592424	0.330809	-0.261615
cg10620680	37	1	178025100								TRUE	0.758926	0.418392	-0.340533
cg09264231	37	1	178056133								TRUE	0.607162	0.243887	-0.363275
cg19343715	37	1	178135254	RASAL2	NM_170692	Body						0.639525	0.280288	-0.359238
cg01559644	37	1	178157646	RASAL2	NM_170692	Body				chr1:178157578-178157578		0.855435	0.528719	-0.326716
cg25573644	37	1	178245008	RASAL2	NM_170692	Body						0.87947	0.587711	-0.291759
cg13364003	37	1	178816963	RALGPS2;RALGPS2	NM_001286247;NM_152663	Body;Body						0.767984	0.492834	-0.27515
cg07179903	37	1	178836999	ANGPTL1;RALGPS2;RALGPS2	NM_004673;NM_001286247;NM_152663	5'UTR;Body;Body						0.576499	0.31572	-0.26078
cg18034978	37	1	179479373	AXDND1;AXDND1	NR_073544;NM_144696	Body;Body						0.796777	0.534473	-0.262304
cg16346032	37	1	180100912								TRUE	0.697982	0.393661	-0.304321
cg24475499	37	1	180551181									0.556017	0.302487	-0.253531
cg19659833	37	1	180821196	XPR1;XPR1	NM_004736;NM_001135669	Body;Body						0.892383	0.574371	-0.318011
cg20088478	37	1	180984104	STX6;STX6	NM_005819;NM_001286210	Body;5'UTR						0.8274	0.531344	-0.296056
cg04762199	37	1	181048756									0.720524	0.435914	-0.28461
cg06975179	37	1	181119042									0.85073	0.577967	-0.272763
cg06721782	37	1	181204397	GM140	NR_046249	TSS1500						0.850559	0.5683	-0.282258
cg05228456	37	1	181367895									0.692241	0.406568	-0.285673
cg23293998	37	1	181702370	CACNA1E;CACNA1E;CACNA1E	NM_000721;NM_001205293;NM_001205294	Body;Body;Body						0.606526	0.322574	-0.283952
cg19866866	37	1	182026044	ZNF648	NM_001009992	Body	chr1:182025604-182026511	Island			TRUE	0.55312	0.273416	-0.279704
cg20571119	37	1	182118862							chr1:182118170-182118170		0.872811	0.586735	-0.286076
cg13632980	37	1	182140237							chr1:182140043-182140043		0.525727	0.242661	-0.283066
cg11646124	37	1	182140416							chr1:182140043-182140043		0.61592	0.364839	-0.251081
cg12736821	37	1	182400136									0.68202	0.412581	-0.269438
cg00972755	37	1	182859418									0.668046	0.382731	-0.285315
cg12689670	37	1	183009347	LAMC1	NM_002293	Body					TRUE	0.544181	0.161637	-0.382544
cg04862210	37	1	183017940	LAMC1	NM_002293	Body						0.760885	0.483347	-0.277538
cg05380885	37	1	183274661	NMNAT2;NMNAT2	NM_015039;NM_170706	Body;TSS1500					TRUE	0.81153	0.559954	-0.251576
cg03325543	37	1	183576580							chr1:183576409-183576409		0.872444	0.567624	-0.30482
cg22175552	37	1	183779591	RGL1;RGL1;RGL1;RGL1;RGL1	NM_015149;NM_001297670;NM_001297669;NM_001297671;NM_001297672	Body;Body;Body;Body;Body						0.871207	0.574863	-0.296344
cg25639997	37	1	183786445	RGL1;RGL1;RGL1;RGL1;RGL1	NM_015149;NM_001297670;NM_001297669;NM_001297671;NM_001297672	Body;Body;Body;Body;Body						0.533561	0.158397	-0.375164
cg22841357	37	1	183811795	RGL1;RGL1;RGL1;RGL1;RGL1	NM_015149;NM_001297670;NM_001297669;NM_001297671;NM_001297672	Body;Body;Body;Body;Body				chr1:183811794-183811794		0.49034	0.206813	-0.283527
cg08088593	37	1	183814672	RGL1;RGL1;RGL1;RGL1;RGL1	NM_015149;NM_001297670;NM_001297669;NM_001297671;NM_001297672	Body;Body;Body;Body;Body						0.774393	0.515271	-0.259122
cg06915310	37	1	183865731	RGL1;RGL1;RGL1;RGL1;RGL1	NM_015149;NM_001297670;NM_001297669;NM_001297671;NM_001297672	Body;Body;Body;Body;Body				chr1:183865521-183865521		0.863179	0.563747	-0.299432
cg10028941	37	1	184121919									0.470798	0.120196	-0.350602
cg13100449	37	1	184836205	FAM129A	NM_052966	Body				chr1:184836042-184836042	TRUE	0.691979	0.256257	-0.435722
cg10736902	37	1	184836216	FAM129A	NM_052966	Body				chr1:184836042-184836042		0.744632	0.391115	-0.353517
cg21319117	37	1	184837338	FAM129A	NM_052966	Body						0.607613	0.217204	-0.39041
cg06413718	37	1	184861111	FAM129A	NM_052966	Body						0.855405	0.597155	-0.258249
cg21496173	37	1	185308095									0.874778	0.469353	-0.405426
cg09150550	37	1	185308635							chr1:185308384-185308384		0.676812	0.304524	-0.372288
cg05064829	37	1	185378124									0.746324	0.492491	-0.253833
cg26800264	37	1	185530998	LINC01350	NR_110793	Body						0.600125	0.258132	-0.341993
cg14070021	37	1	185536838	LINC01350	NR_110793	Body						0.620822	0.338403	-0.28242
cg10079307	37	1	185643427									0.816812	0.490599	-0.326213
cg26848982	37	1	186019658	HMCN1	NM_031935	Body						0.735843	0.438957	-0.296885
cg11333566	37	1	186062773	HMCN1;MIR548F1	NM_031935;NR_031642	Body;Body						0.532697	0.234929	-0.297768
cg01188867	37	1	186071906	HMCN1;MIR548F1	NM_031935;NR_031642	Body;Body						0.44468	0.143881	-0.300799
cg13779665	37	1	186708260							chr1:186707805-186707805		0.880037	0.612352	-0.267685
cg03985021	37	1	186732591									0.682422	0.385392	-0.29703
cg06791489	37	1	191190697									0.86971	0.588874	-0.280837
cg25596040	37	1	192139430	RGS18	NM_130782	Body						0.797385	0.481458	-0.315927
cg15041339	37	1	192486199							chr1:192485848-192485848		0.794149	0.481187	-0.312962
cg01807392	37	1	192490949							chr1:192490879-192490879		0.756862	0.425407	-0.331455
cg14994032	37	1	192500435							chr1:192500254-192500254		0.621922	0.319854	-0.302068
cg12591668	37	1	192520335							chr1:192519890-192519890	TRUE	0.633737	0.219386	-0.414351
cg02586212	37	1	192544902	RGS1;RGS1	NM_002922;NM_002922	1stExon;5'UTR			low-CpG:190811525-190811533		TRUE	0.934184	0.656782	-0.277402
cg01707943	37	1	192574382							chr1:192574180-192574180		0.859072	0.565077	-0.293996
cg09978023	37	1	192608588	RGS13;RGS13	NM_002927;NM_144766	5'UTR;5'UTR					TRUE	0.771209	0.51646	-0.254749
cg00024937	37	1	192848662							chr1:192848433-192848433		0.584315	0.32035	-0.263965
cg18999636	37	1	193324632	LINC01031	NR_125789	Body						0.441542	0.177	-0.264542
cg27522733	37	1	193448591							chr1:193448401-193448401		0.823504	0.481709	-0.341795
cg08605580	37	1	193509241									0.770187	0.494407	-0.275779
cg20008885	37	1	193670163									0.824707	0.552257	-0.27245
cg08190027	37	1	195164833									0.593324	0.295915	-0.297409
cg23557926	37	1	196620963	CFH;CFH	NM_000186;NM_001014975	TSS200;TSS200					TRUE	0.368796	0.0859962	-0.2828
cg13441112	37	1	196844364				chr1:196847158-196847418	N_Shelf			TRUE	0.677296	0.425432	-0.251864
cg25840094	37	1	196945530	CFHR5	NM_030787	TSS1500					TRUE	0.751335	0.485065	-0.26627
cg22341908	37	1	197747884				chr1:197743931-197744788	S_Shelf			TRUE	0.523552	0.262021	-0.261531
cg11150303	37	1	198333105									0.883077	0.573835	-0.309242
cg11995328	37	1	198492380	ATP6V1G3;ATP6V1G3	NM_133262;NM_133326	3'UTR;3'UTR						0.744108	0.469592	-0.274516
cg07324083	37	1	198590276							chr1:198590109-198590109		0.798912	0.412619	-0.386293
cg04579668	37	1	198593642									0.815	0.540134	-0.274866
cg03226454	37	1	198608163	PTPRC;PTPRC;PTPRC;PTPRC;PTPRC;PTPRC;PTPRC	NM_080921;NM_001267798;NM_002838;NM_080921;NM_001267798;NM_002838;NR_052021	1stExon;1stExon;1stExon;5'UTR;5'UTR;5'UTR;Body						0.647297	0.328533	-0.318763
cg13673094	37	1	198608361	PTPRC;PTPRC;PTPRC;PTPRC	NM_080921;NM_080923;NM_080922;NM_002838	5'UTR;5'UTR;5'UTR;5'UTR					TRUE	0.88428	0.573475	-0.310805
cg25132230	37	1	198608383	PTPRC;PTPRC;PTPRC;PTPRC	NM_080921;NM_080923;NM_080922;NM_002838	5'UTR;5'UTR;5'UTR;5'UTR					TRUE	0.90314	0.603195	-0.299944
cg18157505	37	1	198609502	PTPRC;PTPRC;PTPRC;PTPRC	NR_052021;NM_001267798;NM_080921;NM_002838	Body;Body;Body;Body						0.745798	0.495213	-0.250585
cg02147055	37	1	198610651	PTPRC;PTPRC;PTPRC;PTPRC	NR_052021;NM_001267798;NM_080921;NM_002838	Body;Body;Body;Body						0.811279	0.511876	-0.299403
cg17191718	37	1	198618544	PTPRC;PTPRC;PTPRC;PTPRC	NR_052021;NM_001267798;NM_080921;NM_002838	Body;Body;Body;Body						0.897456	0.644649	-0.252807
cg08152411	37	1	198629993	PTPRC;PTPRC;PTPRC;PTPRC	NR_052021;NM_001267798;NM_080921;NM_002838	Body;Body;Body;Body						0.909535	0.564117	-0.345418
cg22073152	37	1	198633497	PTPRC;PTPRC;PTPRC;PTPRC	NM_080922;NM_002838;NM_080923;NM_080921	Body;Body;Body;Body				chr1:198633275-198633275	TRUE	0.706451	0.388764	-0.317687
cg04214459	37	1	198637612	PTPRC;PTPRC;PTPRC;PTPRC	NM_080922;NM_002838;NM_080923;NM_080921	Body;Body;Body;Body					TRUE	0.730126	0.433379	-0.296747
cg23360308	37	1	198648220	PTPRC;PTPRC;PTPRC;PTPRC	NR_052021;NM_001267798;NM_080921;NM_002838	Body;Body;Body;Body				chr1:198648160-198648160		0.825703	0.521772	-0.30393
cg09247619	37	1	198648849	PTPRC;PTPRC;PTPRC;PTPRC	NM_080922;NM_002838;NM_080923;NM_080921	Body;Body;Body;Body				chr1:198648714-198648714	TRUE	0.840677	0.537003	-0.303674
cg26399994	37	1	198649046	PTPRC;PTPRC;PTPRC;PTPRC	NM_080922;NM_002838;NM_080923;NM_080921	Body;Body;Body;Body				chr1:198648714-198648714	TRUE	0.940962	0.660915	-0.280047
cg23095383	37	1	198649189	PTPRC;PTPRC;PTPRC;PTPRC	NM_080922;NM_002838;NM_080923;NM_080921	Body;Body;Body;Body				chr1:198648714-198648714	TRUE	0.951312	0.677777	-0.273534
cg15626828	37	1	198651141	PTPRC;PTPRC;PTPRC;PTPRC	NM_080922;NM_002838;NM_080923;NM_080921	Body;Body;Body;Body				chr1:198650930-198650930	TRUE	0.499048	0.193344	-0.305705
cg05390480	37	1	199059142									0.659192	0.38836	-0.270832
cg09097948	37	1	199212861									0.627741	0.348523	-0.279218
cg10704086	37	1	199826512							chr1:199826452-199826452		0.65687	0.377413	-0.279457
cg19627796	37	1	199828975							chr1:199828633-199828633		0.503056	0.110899	-0.392157
cg12471814	37	1	199911355									0.718038	0.442889	-0.275149
cg11891887	37	1	200323547	LINC00862	NR_040064	Body				chr1:200323350-200323350		0.878697	0.464874	-0.413823
cg07913379	37	1	200325145	LINC00862	NR_040064	Body				chr1:200325072-200325072		0.792677	0.525539	-0.267137
cg19612570	37	1	200443284									0.723663	0.416232	-0.307431
cg03040292	37	1	200847096				chr1:200842196-200843388	S_Shelf			TRUE	0.84303	0.578821	-0.264209
cg10789787	37	1	200895186									0.601109	0.258374	-0.342735
cg07586285	37	1	200994978				chr1:200992282-200992839	S_Shelf			TRUE	0.848754	0.53926	-0.309494
cg03926342	37	1	201334795	TNNT2;TNNT2;TNNT2;TNNT2;TNNT2;TNNT2;TNNT2;TNNT2;TNNT2;TNNT2;TNNT2;TNNT2;TNNT2;TNNT2	NM_001001430;NM_001001432;NM_001001431;NM_000364;NM_001276347;NM_001276346;NM_001276345;NM_001001430;NM_001001432;NM_001001431;NM_000364;NM_001276347;NM_001276346;NM_001276345	Body;Body;Body;Body;Body;Body;Body;ExonBnd;ExonBnd;ExonBnd;ExonBnd;ExonBnd;ExonBnd;ExonBnd						0.90908	0.485333	-0.423746
cg05705046	37	1	201414152									0.73724	0.48297	-0.25427
cg05888850	37	1	201423373									0.575075	0.285138	-0.289937
cg20512369	37	1	201547075									0.869253	0.597705	-0.271548
cg16393905	37	1	201605733								TRUE	0.84928	0.567805	-0.281475
cg04792540	37	1	201606968									0.768101	0.497062	-0.27104
cg17753974	37	1	201622519	NAV1	NM_020443	Body	chr1:201617041-201619788	S_Shelf			TRUE	0.813202	0.464731	-0.348471
cg00005325	37	1	201684967	NAV1;IPO9-AS1	NM_020443;NR_046696	Body;Body				chr1:201684946-201684946		0.587255	0.232555	-0.3547
cg17360849	37	1	201688419	MIR5191;NAV1;IPO9-AS1	NR_049823;NM_020443;NR_046696	TSS1500;Body;Body						0.874708	0.601922	-0.272786
cg25823077	37	1	201717654	NAV1;IPO9-AS1;NAV1	NM_020443;NR_046696;NM_001167738	Body;Body;Body						0.707522	0.322862	-0.38466
cg00903584	37	1	202128682	PTPN7;PTPN7;PTPN7	NM_080588;NM_002832;NM_080588	5'UTR;5'UTR;1stExon					TRUE	0.897484	0.58442	-0.313064
cg19675731	37	1	202129192	PTPN7;PTPN7	NM_080588;NM_002832	TSS200;5'UTR					TRUE	0.762556	0.47457	-0.287986
cg16266227	37	1	202129204	PTPN7;PTPN7	NM_080588;NM_002832	TSS200;5'UTR					TRUE	0.743795	0.46388	-0.279915
cg22008490	37	1	202129255	PTPN7;PTPN7	NM_080588;NM_002832	TSS200;5'UTR					TRUE	0.728228	0.439129	-0.289099
cg23506842	37	1	202130920	PTPN7	NM_002832	TSS1500					TRUE	0.743777	0.477987	-0.26579
cg15027815	37	1	202131184	PTPN7	NM_002832	TSS1500					TRUE	0.708432	0.452656	-0.255777
cg02685953	37	1	202212373	LGR6;LGR6;LGR6	NM_001017403;NM_021636;NM_001017404	Body;Body;Body						0.87624	0.591498	-0.284742
cg09713090	37	1	202243891	LGR6;LGR6;LGR6	NM_001017403;NM_021636;NM_001017404	Body;Body;Body						0.783906	0.516522	-0.267383
cg00392462	37	1	202244956	LGR6;LGR6;LGR6	NM_001017403;NM_021636;NM_001017404	Body;Body;Body						0.736616	0.479251	-0.257365
cg25846135	37	1	202264913	LGR6;LGR6;LGR6	NM_001017403;NM_021636;NM_001017404	Body;Body;Body						0.592117	0.303271	-0.288846
cg17819732	37	1	203147367								TRUE	0.604333	0.301206	-0.303127
cg04797959	37	1	203165382									0.812774	0.533305	-0.279469
cg03063667	37	1	203395530									0.794001	0.471338	-0.322663
cg09108686	37	1	203582462									0.879747	0.578307	-0.301441
cg22367549	37	1	203643084	ATP2B4;ATP2B4	NM_001001396;NM_001684	5'UTR;5'UTR					TRUE	0.416869	0.113613	-0.303257
cg02563479	37	1	203651885	ATP2B4;ATP2B4;ATP2B4;ATP2B4	NM_001684;NM_001001396;NM_001684;NM_001001396	ExonBnd;ExonBnd;5'UTR;5'UTR						0.75177	0.401758	-0.350012
cg05181290	37	1	203733914	LAX1;LAX1	NM_017773;NM_001136190	TSS1500;TSS1500						0.818127	0.547312	-0.270815
cg10117369	37	1	203734256	LAX1;LAX1	NM_017773;NM_001136190	TSS200;TSS200					TRUE	0.57275	0.313158	-0.259592
cg16948489	37	1	203734262	LAX1;LAX1	NM_017773;NM_001136190	TSS200;TSS200						0.773947	0.482203	-0.291744
cg17711527	37	1	203734396	LAX1;LAX1;LAX1;LAX1	NM_017773;NM_001136190;NM_001136190;NM_017773	1stExon;1stExon;5'UTR;5'UTR					TRUE	0.547448	0.254405	-0.293043
cg06958535	37	1	203734478	LAX1;LAX1;LAX1	NM_017773;NM_001136190;NM_017773	1stExon;1stExon;5'UTR					TRUE	0.901697	0.645166	-0.256531
cg12022621	37	1	203734505	LAX1;LAX1;LAX1	NM_017773;NM_001136190;NM_017773	1stExon;1stExon;5'UTR					TRUE	0.611236	0.31922	-0.292017
cg20271330	37	1	204338515	LOC127841	NR_027022	Body					TRUE	0.788151	0.517227	-0.270924
cg03551950	37	1	204422675	PIK3C2B	NM_002646	Body						0.830749	0.540656	-0.290093
cg05098050	37	1	204434059	PIK3C2B	NM_002646	Body						0.689242	0.429456	-0.259786
cg10661893	37	1	204482706				chr1:204485473-204485831	N_Shelf				0.690977	0.429108	-0.26187
cg01330815	37	1	204652225	LRRN2;LRRN2	NM_006338;NM_201630	5'UTR;5'UTR	chr1:204654132-204654885	N_Shore			TRUE	0.690691	0.423317	-0.267374
cg22817352	37	1	204653629	LRRN2;LRRN2	NM_006338;NM_201630	5'UTR;5'UTR	chr1:204654132-204654885	N_Shore		chr1:204653343-204653343	TRUE	0.629016	0.295183	-0.333833
cg23706070	37	1	204695216									0.504924	0.248251	-0.256673
cg27092613	37	1	205206841	TMCC2;TMCC2	NM_014858;NM_001242925	Body;5'UTR	chr1:205210695-205210918	N_Shelf				0.817468	0.556998	-0.26047
cg08326593	37	1	205230617	TMCC2;TMCC2;TMCC2;TMCC2	NM_014858;NM_001242925;NM_001297611;NM_001297613	Body;Body;Body;Body						0.573189	0.243588	-0.3296
cg25090265	37	1	205459532									0.486633	0.195736	-0.290898
cg04293265	37	1	205562754	MFSD4	NM_181644	Body	chr1:205561089-205561473	S_Shore				0.621284	0.310873	-0.310411
cg00050898	37	1	205562970	MFSD4	NM_181644	Body	chr1:205561089-205561473	S_Shore				0.762188	0.431673	-0.330515
cg25918334	37	1	205902896	SLC26A9;SLC26A9	NM_134325;NM_052934	Body;Body						0.553251	0.26847	-0.284781
cg26596278	37	1	206227162	AVPR1B	NM_000707	Body	chr1:206223537-206224028	S_Shelf				0.887004	0.55909	-0.327914
cg04773587	37	1	206736644	RASSF5;RASSF5;RASSF5	NM_182665;NM_182664;NM_182663	Body;Body;Body						0.819349	0.514223	-0.305126
cg12691994	37	1	206748850	RASSF5;RASSF5;RASSF5	NM_182663;NM_182665;NM_182664	Body;Body;Body				chr1:206748515-206748515	TRUE	0.56197	0.291643	-0.270327
cg13848363	37	1	206749188	RASSF5;RASSF5;RASSF5	NM_182665;NM_182664;NM_182663	Body;Body;Body				chr1:206748926-206748926		0.815874	0.47579	-0.340084
cg08128274	37	1	206832043								TRUE	0.511973	0.26026	-0.251713
cg11784753	37	1	206853217									0.854499	0.59307	-0.261429
cg02669047	37	1	206931233							chr1:206931189-206931189		0.758842	0.449609	-0.309233
cg10978799	37	1	206945924	IL10	NM_000572	TSS200					TRUE	0.732403	0.469204	-0.263199
cg20427362	37	1	206955971									0.848454	0.560913	-0.287541
cg12073436	37	1	206958014								TRUE	0.828775	0.560872	-0.267903
cg16513119	37	1	207002661	IL19;IL19	NM_013371;NM_153758	5'UTR;Body						0.858807	0.603416	-0.255391
cg06640279	37	1	207095153	FAIM3;FAIM3;FAIM3	NM_001142473;NM_001142472;NM_005449	Body;Body;Body					TRUE	0.731896	0.36218	-0.369717
cg08042491	37	1	207095257	FCMR;FCMR;FCMR;FCMR;FCMR	NM_001142473;NM_005449;NM_001142473;NM_005449;NM_001193338	1stExon;1stExon;5'UTR;5'UTR;TSS200						0.797637	0.402449	-0.395188
cg15158847	37	1	207095315	FAIM3;FAIM3;FAIM3;FAIM3;FAIM3	NM_001142472;NM_005449;NM_001142473;NM_005449;NM_001142473	5'UTR;5'UTR;1stExon;1stExon;5'UTR					TRUE	0.55759	0.240876	-0.316714
cg24107163	37	1	207095332	FAIM3;FAIM3;FAIM3;FAIM3;FAIM3	NM_001142472;NM_005449;NM_001142473;NM_005449;NM_001142473	5'UTR;5'UTR;1stExon;1stExon;5'UTR					TRUE	0.743259	0.363633	-0.379625
cg16882751	37	1	207095405	FCMR;FCMR;FCMR	NM_001193338;NM_001142473;NM_005449	TSS200;TSS200;TSS200						0.815066	0.437446	-0.37762
cg05245760	37	1	207095578	FCMR;FCMR;FCMR	NM_001193338;NM_001142473;NM_005449	TSS1500;TSS1500;TSS1500						0.840648	0.491812	-0.348836
cg17460386	37	1	207095668	FAIM3;FAIM3;FAIM3	NM_001142472;NM_005449;NM_001142473	5'UTR;TSS1500;TSS1500					TRUE	0.861954	0.504157	-0.357797
cg17100176	37	1	207096358	FAIM3;FAIM3;FAIM3	NM_001142472;NM_005449;NM_001142473	5'UTR;TSS1500;TSS1500					TRUE	0.902032	0.595427	-0.306604
cg21115691	37	1	207140927	FCAMR;FCAMR;FCAMR;FCAMR	NM_001122980;NM_001122979;NM_032029;NM_001170631	Body;Body;Body;Body					TRUE	0.454409	0.166	-0.288409
cg16729555	37	1	207143533	FCAMR;FCAMR;FCAMR;FCAMR;FCAMR;FCAMR;FCAMR	NM_001122979;NM_032029;NM_001122980;NM_001170631;NM_001170631;NM_032029;NM_001122980	5'UTR;5'UTR;1stExon;1stExon;5'UTR;1stExon;5'UTR					TRUE	0.573948	0.284452	-0.289496
cg26852739	37	1	207144061	FCAMR;FCAMR;FCAMR	NM_001170631;NM_001122979;NM_032029	TSS200;TSS200;TSS200						0.735559	0.454455	-0.281105
cg24190088	37	1	207144648	FCAMR;FCAMR;FCAMR	NM_001170631;NM_001122979;NM_032029	TSS1500;TSS1500;TSS1500						0.828043	0.508101	-0.319942
cg06703104	37	1	207319008									0.677669	0.403692	-0.273977
cg14081456	37	1	207509316	CD55;CD55;CD55;CD55;CD55;CD55	NR_125349;NM_001300902;NM_001300904;NM_000574;NM_001300903;NM_001114752	Body;Body;Body;Body;Body;Body				chr1:207509006-207509006		0.830101	0.552885	-0.277216
cg05956608	37	1	207999258							chr1:207999163-207999163	TRUE	0.577811	0.29375	-0.284061
cg17439800	37	1	208056493								TRUE	0.688355	0.434494	-0.253861
cg04197452	37	1	208083913	CD34;CD34	NM_001025109;NM_001773	Body;Body	chr1:208084098-208084513	N_Shore			TRUE	0.418242	0.129889	-0.288353
cg20293352	37	1	208084942	CD34;CD34	NM_001773;NM_001025109	TSS1500;TSS1500	chr1:208084098-208084513	S_Shore			TRUE	0.506006	0.21549	-0.290516
cg01318967	37	1	208115808							chr1:208115711-208115711		0.662885	0.378177	-0.284708
cg14139038	37	1	209877340	HSD11B1;HSD11B1;HSD11B1	NM_005525;NM_001206741;NM_181755	TSS1500;5'UTR;5'UTR						0.469377	0.150803	-0.318575
cg20191437	37	1	209877382	HSD11B1;HSD11B1;HSD11B1	NM_005525;NM_001206741;NM_181755	TSS1500;5'UTR;5'UTR						0.707245	0.314075	-0.393171
cg00312486	37	1	209877438	HSD11B1;HSD11B1;HSD11B1	NM_005525;NM_001206741;NM_181755	TSS1500;5'UTR;5'UTR						0.740667	0.445579	-0.295088
cg17610535	37	1	209897614	HSD11B1;HSD11B1;HSD11B1	NM_001206741;NM_181755;NM_005525	Body;Body;Body						0.65621	0.307374	-0.348836
cg02947427	37	1	209897658	HSD11B1;HSD11B1;HSD11B1	NM_001206741;NM_181755;NM_005525	Body;Body;Body						0.817652	0.525983	-0.291669
cg08780327	37	1	209897837	HSD11B1;HSD11B1;HSD11B1	NM_001206741;NM_181755;NM_005525	Body;Body;Body						0.515994	0.259914	-0.25608
cg08655071	37	1	209928895	TRAF3IP3	NM_025228	TSS1500					TRUE	0.802205	0.490562	-0.311643
cg26395478	37	1	209929437	TRAF3IP3;TRAF3IP3;TRAF3IP3	NM_025228;NM_025228;NR_109871	1stExon;5'UTR;Body			low-CpG:207996001-207996144			0.69863	0.349737	-0.348892
cg20694619	37	1	209929496	TRAF3IP3	NM_025228	TSS200			low-CpG:207996001-207996144		TRUE	0.661644	0.386124	-0.275521
cg01997629	37	1	209929622	TRAF3IP3;TRAF3IP3	NM_025228;NM_025228	1stExon;5'UTR					TRUE	0.69013	0.402646	-0.287485
cg00450164	37	1	209930127	TRAF3IP3	NM_025228	5'UTR				chr1:209930112-209930112	TRUE	0.747605	0.36847	-0.379135
cg08972363	37	1	209932014	TRAF3IP3;TRAF3IP3	NM_025228;NR_109871	5'UTR;Body						0.451203	0.195589	-0.255614
cg17518842	37	1	209943131	TRAF3IP3	NM_025228	Body				chr1:209942657-209942657	TRUE	0.494583	0.118928	-0.375655
cg11214507	37	1	210419938								TRUE	0.669875	0.202216	-0.46766
cg07068354	37	1	210419949									0.769567	0.273686	-0.495882
cg16140794	37	1	211384247				chr1:211380406-211380783	S_Shelf			TRUE	0.773855	0.520668	-0.253186
cg21158528	37	1	211501629	TRAF5;TRAF5	NM_004619;NM_001033910	5'UTR;5'UTR	chr1:211500151-211500636	S_Shore			TRUE	0.878355	0.626484	-0.251871
cg00658007	37	1	211666129	RD3;RD3;RD3;RD3	NM_001164688;NM_001164688;NM_183059;NM_183059	1stExon;5'UTR;1stExon;5'UTR					TRUE	0.473385	0.204497	-0.268889
cg12372610	37	1	211694647									0.767181	0.511641	-0.25554
cg09980803	37	1	212061180									0.724763	0.393612	-0.331151
cg10466675	37	1	212214107	DTL;DTL;DTL	NM_001286229;NM_016448;NM_001286230	5'UTR;Body;Body						0.70556	0.3818	-0.32376
cg07589342	37	1	212392508								TRUE	0.440691	0.147954	-0.292737
cg01966974	37	1	212830395								TRUE	0.53356	0.212326	-0.321234
cg21713048	37	1	212840626							chr1:212840606-212840606		0.636214	0.317433	-0.318781
cg03219362	37	1	212865360	BATF3	NM_018664	Body						0.856787	0.585884	-0.270903
cg17184651	37	1	212885934									0.654767	0.395674	-0.259093
cg10062460	37	1	213071444	FLVCR1	NM_014053	3'UTR						0.887487	0.240759	-0.646729
cg17914408	37	1	213783750									0.596487	0.327734	-0.268753
cg18732257	37	1	213898865									0.434704	0.173986	-0.260719
cg16242653	37	1	214151615				chr1:214153214-214153668	N_Shore			TRUE	0.757501	0.473104	-0.284397
cg01659176	37	1	214154936				chr1:214156000-214156851	N_Shore			TRUE	0.819473	0.560939	-0.258534
cg05999983	37	1	214157936	PROX1-AS1	NR_037850	Body	chr1:214156000-214156851	S_Shore		chr1:214157858-214157858		0.74681	0.489652	-0.257158
cg04419315	37	1	214167432	PROX1;PROX1	NM_001270616;NM_002763	5'UTR;5'UTR						0.686548	0.412189	-0.274359
cg14038575	37	1	214432990									0.54782	0.281128	-0.266692
cg10585941	37	1	214461479	SMYD2	NM_020197	Body					TRUE	0.907935	0.612335	-0.295599
cg06068545	37	1	214535988	PTPN14	NM_005401	Body						0.699415	0.308207	-0.391208
cg20386404	37	1	214577721	PTPN14	NM_005401	Body					TRUE	0.600805	0.303096	-0.297709
cg06873024	37	1	215130954							chr1:215130656-215130656	TRUE	0.544492	0.288634	-0.255858
cg19111646	37	1	218216679	LOC101929631	NR_110794	TSS200						0.832549	0.560407	-0.272142
cg09357881	37	1	218534854	TGFB2;TGFB2	NM_001135599;NM_003238	Body;Body						0.896756	0.565767	-0.33099
cg10965259	37	1	218636828	MIR548F3	NR_031644	Body				chr1:218636802-218636802		0.568332	0.311347	-0.256985
cg17864399	37	1	218647775	MIR548F3	NR_031644	Body						0.890159	0.594929	-0.29523
cg13327797	37	1	218695426	MIR548F3	NR_031644	Body						0.884335	0.586386	-0.297949
cg16015207	37	1	218697177	MIR548F3	NR_031644	Body						0.783005	0.452329	-0.330676
cg24541641	37	1	218697209	MIR548F3	NR_031644	Body						0.709553	0.408243	-0.30131
cg19631762	37	1	218698561								TRUE	0.708459	0.372787	-0.335672
cg13739348	37	1	218880529	MIR548F3	NR_031644	Body						0.874152	0.588126	-0.286025
cg15548099	37	1	218884690	MIR548F3	NR_031644	Body						0.850768	0.497028	-0.353739
cg09412975	37	1	218892376								TRUE	0.910471	0.651506	-0.258966
cg08710520	37	1	219090191	MIR548F3	NR_031644	Body						0.892464	0.635212	-0.257251
cg06800545	37	1	219503241									0.806723	0.539541	-0.267182
cg14609929	37	1	219562002									0.898612	0.604296	-0.294316
cg21597712	37	1	219586193									0.846716	0.563941	-0.282775
cg03088794	37	1	219587974									0.890162	0.625145	-0.265017
cg13182163	37	1	219616112									0.85495	0.475147	-0.379803
cg05189835	37	1	220187223	RNU5F-1;EPRS	NR_002753;NM_004446	Body;Body						0.845468	0.498715	-0.346753
cg11170368	37	1	220310870	IARS2	NM_018060	Body						0.535558	0.274254	-0.261304
cg11650805	37	1	220608911									0.669724	0.398614	-0.27111
cg13381252	37	1	220875518									0.790611	0.493555	-0.297056
cg01219672	37	1	220960086	MARC1;MARC1	NM_022746;NM_022746	5'UTR;1stExon	chr1:220960016-220960603	Island				0.401205	0.144858	-0.256347
cg05564182	37	1	221219852							chr1:221219642-221219642		0.664059	0.383229	-0.280829
cg18282005	37	1	221881576	DUSP10;DUSP10;DUSP10	NR_111939;NR_111940;NM_007207	Body;Body;Body				chr1:221881394-221881394		0.796292	0.387676	-0.408616
cg07946977	37	1	221886639	DUSP10;DUSP10;DUSP10	NM_144728;NM_007207;NM_144729	5'UTR;Body;5'UTR					TRUE	0.825349	0.449305	-0.376044
cg20616856	37	1	221951356							chr1:221951076-221951076		0.853169	0.56196	-0.29121
cg18726748	37	1	221951837									0.855055	0.564522	-0.290533
cg00033678	37	1	221952060							chr1:221951868-221951868		0.634759	0.341337	-0.293422
cg16306651	37	1	221957045									0.780241	0.406138	-0.374103
cg16730327	37	1	223054067	DISP1	NM_032890	5'UTR						0.712016	0.322987	-0.389029
cg11805424	37	1	223147973	DISP1	NM_032890	Body				chr1:223147896-223147896		0.731835	0.339953	-0.391882
cg23389199	37	1	223205670									0.819421	0.569172	-0.250248
cg17398957	37	1	223327048									0.740821	0.287496	-0.453325
cg13148524	37	1	223363874							chr1:223363832-223363832		0.52608	0.21214	-0.31394
cg06726529	37	1	223883793									0.82639	0.569845	-0.256545
cg24185736	37	1	224020061	TP53BP2;TP53BP2	NM_001031685;NM_005426	Body;5'UTR				chr1:224019430-224019430		0.452021	0.170086	-0.281935
cg03992323	37	1	224023297	TP53BP2;TP53BP2	NM_001031685;NM_005426	Body;5'UTR					TRUE	0.846008	0.594054	-0.251954
cg12993990	37	1	224023540	TP53BP2;TP53BP2	NM_001031685;NM_005426	Body;5'UTR				chr1:224023477-224023477		0.668267	0.259699	-0.408568
cg14177960	37	1	224433148	NVL;NVL;NVL;NVL	NM_001243146;NM_206840;NM_002533;NM_001243147	Body;Body;Body;Body						0.598076	0.333094	-0.264983
cg27519105	37	1	225900175									0.606313	0.325104	-0.281209
cg26341831	37	1	226036279	TMEM63A	NM_014698	Body					TRUE	0.614155	0.358816	-0.255339
cg25983849	37	1	226053937	TMEM63A	NM_014698	Body						0.673042	0.376314	-0.296728
cg23051123	37	1	226132841								TRUE	0.633577	0.373703	-0.259874
cg04555937	37	1	226230532							chr1:226230458-226230458		0.896092	0.645765	-0.250326
cg24937136	37	1	226593346	PARP1	NM_001618	Body	chr1:226595333-226595939	N_Shore			TRUE	0.590119	0.266814	-0.323305
cg08769464	37	1	226613218									0.42865	0.177745	-0.250906
cg24008510	37	1	226633056									0.908911	0.650972	-0.257939
cg23740281	37	1	226841990	ITPKB	NM_002221	Body				chr1:226841860-226841860		0.606099	0.246928	-0.35917
cg25487382	37	1	226862907	ITPKB-IT1;ITPKB	NR_103784;NM_002221	TSS200;Body						0.659243	0.249927	-0.409316
cg00650925	37	1	226862915	ITPKB-IT1;ITPKB	NR_103784;NM_002221	TSS200;Body						0.497403	0.151654	-0.345749
cg01897902	37	1	226862959	ITPKB-IT1;ITPKB	NR_103784;NM_002221	TSS200;Body						0.611298	0.178445	-0.432853
cg19769780	37	1	226863138	ITPKB-IT1;ITPKB	NR_103784;NM_002221	TSS1500;Body						0.387802	0.10429	-0.283512
cg02950491	37	1	226866457	ITPKB	NM_002221	Body				chr1:226866232-226866232		0.816996	0.520495	-0.296501
cg00027637	37	1	226900521	ITPKB	NM_002221	Body					TRUE	0.731462	0.431549	-0.299913
cg21422623	37	1	226912213	ITPKB	NM_002221	Body					TRUE	0.792505	0.54164	-0.250865
cg09625214	37	1	226993307									0.683525	0.402537	-0.280988
cg08332381	37	1	227189106	CDC42BPA;CDC42BPA	NM_003607;NM_014826	Body;Body						0.697821	0.317927	-0.379894
cg04878866	37	1	227231680	CDC42BPA;CDC42BPA	NM_003607;NM_014826	Body;Body						0.791369	0.53644	-0.254929
cg12705815	37	1	227261024	CDC42BPA;CDC42BPA	NM_003607;NM_014826	Body;Body						0.786159	0.519849	-0.266311
cg26176362	37	1	227379480	CDC42BPA;CDC42BPA	NM_003607;NM_014826	Body;Body						0.825914	0.444994	-0.380921
cg05479250	37	1	227407146	CDC42BPA;CDC42BPA	NM_003607;NM_014826	Body;Body						0.667505	0.403038	-0.264467
cg12375870	37	1	227431744	CDC42BPA;CDC42BPA	NM_003607;NM_014826	Body;Body						0.780794	0.526682	-0.254111
cg18882687	37	1	228275828	ARF1;ARF1;ARF1;ARF1	NM_001658;NM_001024228;NM_001024227;NM_001024226	5'UTR;5'UTR;5'UTR;5'UTR					TRUE	0.459886	0.158156	-0.301729
cg12197357	37	1	228930267									0.865142	0.502897	-0.362246
cg10624538	37	1	228940806									0.469415	0.15567	-0.313746
cg00095326	37	1	228940949								TRUE	0.449696	0.130564	-0.319132
cg08677047	37	1	229126545									0.573876	0.313417	-0.260459
cg13806870	37	1	229163552								TRUE	0.549776	0.248884	-0.300892
cg09017941	37	1	229163577								TRUE	0.646939	0.26527	-0.381669
cg18001457	37	1	229828242									0.90931	0.581804	-0.327505
cg26369282	37	1	229991967									0.723409	0.376263	-0.347146
cg23688956	37	1	230167197									0.882422	0.539766	-0.342657
cg03767003	37	1	230259588	GALNT2;GALNT2	NM_001291866;NM_004481	Body;Body						0.880364	0.571985	-0.308379
cg01828742	37	1	230305461	GALNT2;GALNT2	NM_001291866;NM_004481	Body;Body						0.856028	0.565734	-0.290294
cg03940650	37	1	230312724	GALNT2;GALNT2	NM_001291866;NM_004481	Body;Body						0.564245	0.276045	-0.2882
cg22159005	37	1	230326909	GALNT2;GALNT2	NM_001291866;NM_004481	Body;Body						0.659758	0.385869	-0.273889
cg09764435	37	1	230348493	GALNT2;GALNT2	NM_001291866;NM_004481	Body;Body						0.825444	0.505981	-0.319463
cg23936766	37	1	230406371	GALNT2	NM_004481	Body					TRUE	0.700567	0.364321	-0.336246
cg13768301	37	1	230489247	PGBD5	NM_001258311	Body	chr1:230492716-230492945	N_Shelf				0.723229	0.466147	-0.257082
cg13100117	37	1	230516116	PGBD5	NM_001258311	Body						0.864787	0.602528	-0.262259
cg14760149	37	1	230571665									0.801207	0.518342	-0.282865
cg04279411	37	1	230645569							chr1:230645276-230645276	TRUE	0.600369	0.153736	-0.446633
cg15798997	37	1	230987348	C1orf198;C1orf198;C1orf198	NM_032800;NM_001136494;NM_001136495	Body;Body;5'UTR						0.824337	0.550822	-0.273515
cg05050910	37	1	231108572	TTC13;TTC13	NM_024525;NM_001122835	Body;Body						0.870079	0.603589	-0.26649
cg17758878	37	1	231229208									0.76149	0.32369	-0.4378
cg00207189	37	1	231244795									0.862794	0.585157	-0.277638
cg04515533	37	1	231295786				chr1:231296559-231297345	N_Shore			TRUE	0.667411	0.385583	-0.281827
cg08020573	37	1	231666092	TSNAX;TSNAX-DISC1;TSNAX-DISC1;TSNAX-DISC1;TSNAX-DISC1;TSNAX-DISC1;TSNAX-DISC1;TSNAX-DISC1;TSNAX-DISC1	NM_005999;NR_028399;NR_028400;NR_028396;NR_028395;NR_028394;NR_028398;NR_028397;NR_028393	Body;Body;Body;Body;Body;Body;Body;Body;Body	chr1:231663999-231664608	S_Shore		chr1:231665787-231665787		0.779699	0.509992	-0.269707
cg09135009	37	1	231666116	TSNAX;TSNAX-DISC1;TSNAX-DISC1;TSNAX-DISC1;TSNAX-DISC1;TSNAX-DISC1;TSNAX-DISC1;TSNAX-DISC1;TSNAX-DISC1	NM_005999;NR_028399;NR_028400;NR_028396;NR_028395;NR_028394;NR_028398;NR_028397;NR_028393	Body;Body;Body;Body;Body;Body;Body;Body;Body	chr1:231663999-231664608	S_Shore				0.827453	0.566493	-0.26096
cg21574629	37	1	231860790	DISC1;DISC1;DISC1;DISC1;DISC1;DISC1;DISC1;DISC1;DISC1;DISC1;DISC1;DISC1;DISC1;DISC1;DISC1;DISC1;DISC1;DISC1;TSNAX-DISC1;TSNAX-DISC1;TSNAX-DISC1;TSNAX-DISC1;TSNAX-DISC1;TSNAX-DISC1;TSNAX-DISC1	NM_001164555;NM_001164551;NM_001164549;NM_001164548;NM_001164556;NM_001164545;NM_001164544;NM_001164539;NM_001012959;NM_001164547;NM_001164546;NM_001164542;NM_001164541;NM_001164538;NM_018662;NM_001164540;NM_001012957;NM_001164537;NR_028400;NR_028396;NR_028395;NR_028394;NR_028398;NR_028397;NR_028393	Body;Body;Body;Body;Body;Body;Body;Body;Body;Body;Body;Body;Body;Body;Body;Body;Body;Body;Body;Body;Body;Body;Body;Body;Body				chr1:231860737-231860737		0.578294	0.243201	-0.335093
cg03799192	37	1	232107358	DISC1;DISC1;DISC1;DISC1;DISC1;DISC1;DISC1;TSNAX-DISC1	NM_001164541;NM_001164538;NM_018662;NM_001164540;NM_001012957;NM_001164537;NM_001164547;NR_028393	Body;Body;Body;Body;Body;Body;3'UTR;Body				chr1:232107055-232107055		0.6701	0.405857	-0.264243
cg01616313	37	1	232464646									0.805212	0.555105	-0.250107
cg02077729	37	1	232714530							chr1:232714427-232714427		0.541172	0.228647	-0.312524
cg18451094	37	1	232725736							chr1:232725638-232725638		0.587296	0.203331	-0.383965
cg03040241	37	1	232732940									0.749371	0.444464	-0.304906
cg05864683	37	1	232735381									0.765138	0.44934	-0.315797
cg12894334	37	1	232736209									0.746429	0.464527	-0.281902
cg14751721	37	1	232791337									0.800539	0.438307	-0.362232
cg16013727	37	1	232795714									0.453974	0.198227	-0.255747
cg03428503	37	1	232864391								TRUE	0.659583	0.389184	-0.270399
cg08263692	37	1	232929513									0.770881	0.516063	-0.254817
cg04031093	37	1	233027124								TRUE	0.657597	0.390473	-0.267124
cg17553122	37	1	233418021	PCNXL2	NM_014801	Body						0.623326	0.321914	-0.301412
cg11294512	37	1	233772102	KCNK1	NM_002245	Body						0.615653	0.354811	-0.260842
cg25575970	37	1	234379305	SLC35F3;SLC35F3	NM_173508;NM_001300845	Body;Body						0.586028	0.326351	-0.259677
cg05485304	37	1	234382487	SLC35F3;SLC35F3	NM_173508;NM_001300845	Body;Body						0.62727	0.363288	-0.263982
cg12584112	37	1	234664566	LINC01354	NR_038426	Body						0.75583	0.4768	-0.27903
cg03105919	37	1	234682885									0.648287	0.362723	-0.285564
cg26314722	37	1	234867300								TRUE	0.386775	0.13486	-0.251915
cg03130910	37	1	234908226							chr1:234908151-234908151	TRUE	0.550516	0.205609	-0.344907
cg04786142	37	1	234908381							chr1:234908151-234908151	TRUE	0.695857	0.356397	-0.33946
cg13209475	37	1	234979009							chr1:234978594-234978594		0.740467	0.40658	-0.333888
cg16209643	37	1	235029662									0.465972	0.16715	-0.298822
cg12641739	37	1	235062535								TRUE	0.849107	0.586188	-0.262919
cg01168166	37	1	235062594									0.739214	0.443791	-0.295423
cg23231148	37	1	235080823							chr1:235080718-235080718		0.658757	0.334926	-0.323832
cg20155035	37	1	235091106							chr1:235091073-235091073	TRUE	0.690492	0.346682	-0.34381
cg05926640	37	1	235091187							chr1:235091073-235091073	TRUE	0.591387	0.264057	-0.327331
cg01947523	37	1	235098925	LOC101927851	NR_125945	Body						0.603885	0.307449	-0.296436
cg27526774	37	1	235099089								TRUE	0.501033	0.107138	-0.393895
cg00311883	37	1	235099120								TRUE	0.586303	0.192345	-0.393958
cg26956141	37	1	235099122	LOC101927851	NR_125945	Body						0.61876	0.21413	-0.40463
cg02088292	37	1	235099151								TRUE	0.68163	0.349088	-0.332542
cg04424002	37	1	235099406	LOC101927851	NR_125945	Body						0.568136	0.272717	-0.295418
cg25902697	37	1	235116637									0.385536	0.0804675	-0.305069
cg18352576	37	1	235116658									0.365415	0.078915	-0.2865
cg13475583	37	1	235116731								TRUE	0.3286	0.0759265	-0.252673
cg07987439	37	1	235116922									0.348782	0.0695832	-0.279199
cg08500811	37	1	235120401							chr1:235120162-235120162		0.610484	0.238866	-0.371618
cg06364996	37	1	235142204									0.92571	0.63378	-0.291931
cg13053471	37	1	235147039							chr1:235146978-235146978		0.814752	0.440055	-0.374697
cg03518729	37	1	235147744								TRUE	0.677435	0.30592	-0.371514
cg08132573	37	1	235159410								TRUE	0.873744	0.544013	-0.329731
cg19269426	37	1	235500468	GGPS1;GGPS1;GGPS1	NM_004837;NM_001037278;NM_001037277	Body;5'UTR;Body					TRUE	0.740748	0.465333	-0.275415
cg23259038	37	1	235656143	B3GALNT2;B3GALNT2	NM_152490;NM_001277155	Body;Body						0.878216	0.586269	-0.291947
cg03140624	37	1	235931377	LYST	NM_000081	Body					TRUE	0.898861	0.626674	-0.272187
cg07655126	37	1	236019440	LYST;LYST;LYST	NR_102436;NM_000081;NM_001301365	Body;5'UTR;5'UTR						0.634665	0.356968	-0.277697
cg05443526	37	1	236022456	LYST;LYST;LYST	NR_102436;NM_000081;NM_001301365	Body;5'UTR;5'UTR				chr1:236022018-236022018		0.73915	0.473146	-0.266004
cg15451967	37	1	236026420	LYST;LYST;LYST	NR_102436;NM_000081;NM_001301365	Body;5'UTR;5'UTR	chr1:236029587-236030597	N_Shelf		chr1:236026265-236026265		0.71808	0.291419	-0.426662
cg22562550	37	1	236039927	LYST;LYST	NR_102436;NM_001301365	Body;5'UTR				chr1:236039869-236039869		0.685969	0.330956	-0.355013
cg10571588	37	1	236102185							chr1:236101998-236101998		0.478815	0.201805	-0.27701
cg13155039	37	1	236118040									0.811569	0.464749	-0.346819
cg14423620	37	1	236118257									0.805328	0.492641	-0.312687
cg16940259	37	1	236323313	GPR137B	NM_003272	Body				chr1:236323296-236323296		0.87382	0.542448	-0.331372
cg17714023	37	1	236579674	EDARADD;EDARADD	NM_145861;NM_080738	Body;Body				chr1:236579529-236579529		0.727802	0.422473	-0.305329
cg14195845	37	1	236911583	ACTN2;ACTN2;ACTN2	NM_001278343;NM_001103;NM_001278344	Body;Body;Body						0.801732	0.513836	-0.287896
cg14397434	37	1	237288473	RYR2	NM_001035	Body						0.763401	0.458784	-0.304617
cg01376818	37	1	238054352	ZP4;LOC100130331	NM_021186;NR_027247	TSS200;Body						0.873395	0.62332	-0.250075
cg26810908	37	1	238054569	ZP4;LOC100130331	NM_021186;NR_027247	TSS1500;Body					TRUE	0.780664	0.530121	-0.250543
cg23093137	37	1	238226727									0.736963	0.464021	-0.272942
cg06878499	37	1	239621510								TRUE	0.58861	0.337893	-0.250717
cg18853490	37	1	239882840	CHRM3	NM_000740	5'UTR					TRUE	0.701026	0.396099	-0.304927
cg27546881	37	1	239882877	CHRM3-AS2;CHRM3	NR_103776;NM_000740	TSS1500;5'UTR						0.718899	0.446538	-0.272361
cg12298429	37	1	239883464	CHRM3-AS2;CHRM3	NR_103776;NM_000740	TSS1500;5'UTR						0.785508	0.502321	-0.283187
cg24454158	37	1	240476462	FMN2;FMN2	NM_020066;NM_001305424	Body;Body				chr1:240476321-240476321		0.707534	0.375079	-0.332455
cg00371383	37	1	240476592	FMN2;FMN2	NM_020066;NM_001305424	Body;Body						0.834598	0.569784	-0.264814
cg15236354	37	1	240739803	GREM2;MIR1273E	NM_022469;NR_128706	5'UTR;Body						0.4511	0.111749	-0.33935
cg22006089	37	1	240776779	GREM2;MIR1273E	NM_022469;NR_128706	TSS1500;Body						0.583473	0.287602	-0.295871
cg20011860	37	1	241162281	RGS7;RGS7;RGS7;RGS7	NM_002924;NM_001282778;NM_001282775;NM_001282773	Body;Body;Body;Body						0.885702	0.414371	-0.471331
cg07787634	37	1	241715378	KMO	NM_003679	Body				chr1:241714901-241714901	TRUE	0.851852	0.510865	-0.340986
cg08867067	37	1	241840773	WDR64	NM_144625	Body						0.869663	0.495496	-0.374166
cg22999475	37	1	244387885									0.674496	0.408355	-0.266141
cg15779457	37	1	244481810									0.913992	0.648669	-0.265323
cg12726120	37	1	244892984				chr1:244893441-244894366	N_Shore			TRUE	0.393012	0.116162	-0.27685
cg21301514	37	1	245343957	KIF26B	NM_018012	Body					TRUE	0.528663	0.244784	-0.283879
cg14251889	37	1	245785119	KIF26B	NM_018012	Body						0.837579	0.551434	-0.286145
cg03401826	37	1	246119601	SMYD3;SMYD3	NM_022743;NM_001167740	Body;Body						0.65226	0.281471	-0.370788
cg15911978	37	1	246119774	SMYD3;SMYD3	NM_022743;NM_001167740	Body;Body						0.832947	0.408187	-0.424759
cg05913921	37	1	246154118	SMYD3;SMYD3	NM_022743;NM_001167740	Body;Body						0.71569	0.416277	-0.299412
cg15124636	37	1	246734875	CNST;CNST	NM_152609;NM_001139459	5'UTR;5'UTR						0.525246	0.191335	-0.333911
cg20190718	37	1	247123455	ZNF695;ZNF695;ZNF670-ZNF695	NR_037892;NM_001204221;NR_037894	Body;Body;Body				chr1:247123303-247123303		0.64427	0.265621	-0.378649
cg20814813	37	1	247506185								TRUE	0.81733	0.551747	-0.265583
cg12954867	37	1	247573293							chr1:247573090-247573090		0.819476	0.502122	-0.317354
cg09836782	37	1	247573689									0.691656	0.437083	-0.254573
cg21919599	37	1	247579312	NLRP3;NLRP3	NM_001127461;NM_001079821	TSS200;TSS200					TRUE	0.580038	0.280908	-0.29913
cg09418290	37	1	247579319	NLRP3;NLRP3	NM_001127461;NM_001079821	TSS200;TSS200						0.60859	0.26025	-0.348341
cg10877667	37	1	247579439	NLRP3;NLRP3	NM_001127461;NM_001079821	TSS200;TSS200						0.535925	0.161161	-0.374764
cg03505654	37	1	247579608	NLRP3;NLRP3	NM_001079821;NM_001127461	5'UTR;5'UTR					TRUE	0.694435	0.311612	-0.382824
cg16385583	37	1	247711595	C1orf150	NM_145278	TSS1500					TRUE	0.540496	0.263438	-0.277058
cg03343128	37	1	247712140	C1orf150	NM_145278	TSS1500					TRUE	0.741562	0.441485	-0.300078
cg18908499	37	1	247712237	C1orf150	NM_145278	TSS1500					TRUE	0.87828	0.531888	-0.346392
cg12769118	37	1	247712377	C1orf150	NM_145278	TSS200					TRUE	0.714276	0.456863	-0.257413
cg17518550	37	1	247712383	C1orf150	NM_145278	TSS200					TRUE	0.720179	0.423445	-0.296734
cg13696074	37	1	248651773	OR2T5	NM_001004697	TSS200						0.738049	0.464244	-0.273805
cg16749589	37	1	248722908	OR2T29	NM_001004694	TSS200						0.750589	0.482215	-0.268375
cg10876135	37	1	248815570	OR2T27	NM_001001824	TSS1500						0.6396	0.338888	-0.300713
cg02152128	37	1	249128879				chr1:249132080-249133310	N_Shelf			TRUE	0.596019	0.319434	-0.276586
cg12225710	37	1	249219611									0.557448	0.286633	-0.270815
cg02320265	37	2	160894									0.678546	0.423125	-0.255422
cg07755896	37	2	460967									0.572363	0.300031	-0.272332
cg06534853	37	2	662602				chr2:660666-660909	S_Shore			TRUE	0.555172	0.228585	-0.326587
cg06700063	37	2	1158609	SNTG2	NM_018968	Body						0.509109	0.237391	-0.271717
cg19491207	37	2	1163050	SNTG2	NM_018968	Body	chr2:1163016-1163820	Island			TRUE	0.725846	0.467033	-0.258813
cg10215032	37	2	1895407	MYT1L	NM_015025	Body	chr2:1895697-1895932	N_Shore			TRUE	0.50982	0.194667	-0.315154
cg09745330	37	2	2226943	MYT1L;MYT1L	NM_001303052;NM_015025	5'UTR;5'UTR						0.507635	0.190951	-0.316684
cg14477571	37	2	2798505									0.71297	0.451826	-0.261144
cg18685808	37	2	2884335									0.682829	0.411543	-0.271286
cg11902863	37	2	3044737								TRUE	0.520226	0.183334	-0.336892
cg07295362	37	2	3061128				chr2:3063372-3063672	N_Shelf			TRUE	0.737578	0.374365	-0.363213
cg00133116	37	2	3149709									0.532255	0.212272	-0.319984
cg21495502	37	2	3227051	TSSC1	NM_003310	Body				chr2:3226904-3226904		0.666013	0.351808	-0.314205
cg17018422	37	2	3421212	TRAPPC12	NM_016030	Body						0.616066	0.16788	-0.448186
cg21357634	37	2	3800503	DCDC2C;DCDC2C	NM_001287444;NM_001287444	ExonBnd;Body						0.752196	0.494559	-0.257637
cg24903223	37	2	3875413	DCDC2C	NM_001287444	Body						0.469524	0.165785	-0.303738
cg13442833	37	2	4962504									0.813575	0.540751	-0.272823
cg16286233	37	2	6774090	LINC01246;LINC01246;LINC01246	NR_110500;NR_110498;NR_110498	TSS200;ExonBnd;Body						0.833561	0.571483	-0.262078
cg07202552	37	2	7199575									0.782198	0.401681	-0.380517
cg12183209	37	2	7652210									0.937734	0.644286	-0.293448
cg03333781	37	2	8216794	LINC00299	NR_034135	Body						0.903946	0.587731	-0.316215
cg18142637	37	2	8379176	LINC00299	NR_034135	Body				chr2:8379033-8379033		0.68064	0.290917	-0.389722
cg06702484	37	2	8443774	LINC00299	NR_034135	Body				chr2:8443687-8443687		0.604794	0.2141	-0.390694
cg18854004	37	2	8444004								TRUE	0.825062	0.520367	-0.304695
cg11820593	37	2	8451047	LINC00299	NR_034135	Body						0.700089	0.408344	-0.291745
cg26020743	37	2	8469935	LINC00299	NR_034135	TSS1500						0.646799	0.361885	-0.284914
cg15015275	37	2	8470042	LINC00299	NR_034135	TSS1500						0.7014	0.414246	-0.287155
cg09742465	37	2	8618154								TRUE	0.66592	0.363494	-0.302426
cg15981982	37	2	8685837								TRUE	0.644524	0.369239	-0.275285
cg24578769	37	2	8692174							chr2:8691975-8691975		0.774705	0.492631	-0.282074
cg12457361	37	2	8716988	LOC101929567	NR_110257	Body						0.850264	0.484964	-0.365301
cg00030290	37	2	8717173	LOC101929567	NR_110257	Body						0.426092	0.140923	-0.285169
cg01201959	37	2	8748898									0.902174	0.434027	-0.468147
cg12244013	37	2	9307243								TRUE	0.825881	0.569531	-0.25635
cg11487379	37	2	9428037	ASAP2;ASAP2	NM_001135191;NM_003887	Body;Body				chr2:9427801-9427801		0.562258	0.230609	-0.331649
cg04662153	37	2	9428664	ASAP2;ASAP2	NM_001135191;NM_003887	Body;Body				chr2:9428594-9428594		0.79728	0.498846	-0.298435
cg14637549	37	2	9467430	ASAP2;ASAP2	NM_001135191;NM_003887	Body;Body						0.546922	0.271164	-0.275758
cg19426625	37	2	9518324	ASAP2;ASAP2	NM_001135191;NM_003887	Body;Body	chr2:9514723-9514995	S_Shelf			TRUE	0.847601	0.495956	-0.351645
cg27012129	37	2	9852450									0.860709	0.472602	-0.388107
cg03105831	37	2	10134031	GRHL1	NM_198182	Body						0.528368	0.187955	-0.340413
cg09152353	37	2	10134152	GRHL1	NM_198182	Body						0.722151	0.413174	-0.308977
cg25946605	37	2	10221185	CYS1	NM_001037160	TSS1500	chr2:10219802-10221016	S_Shore			TRUE	0.598902	0.269125	-0.329778
cg03513867	37	2	10237542									0.382338	0.117602	-0.264736
cg23402329	37	2	10258392				chr2:10260279-10260931	N_Shore		chr2:10258344-10258344		0.597946	0.31603	-0.281916
cg04747102	37	2	10418766							chr2:10418251-10418251		0.592152	0.29528	-0.296872
cg05940672	37	2	10438486				chr2:10442308-10444509	N_Shelf			TRUE	0.719774	0.354623	-0.365151
cg18616925	37	2	10470123	HPCAL1;HPCAL1;HPCAL1	NM_001258357;NM_002149;NM_134421	TSS200;5'UTR;5'UTR						0.744784	0.453701	-0.291083
cg25128949	37	2	10470142	HPCAL1;HPCAL1;HPCAL1	NM_001258357;NM_002149;NM_134421	TSS200;5'UTR;5'UTR						0.852149	0.57895	-0.273198
cg06114320	37	2	10470282	HPCAL1;HPCAL1;HPCAL1	NM_001258357;NM_002149;NM_134421	TSS200;5'UTR;5'UTR						0.897708	0.634801	-0.262907
cg01381586	37	2	10587627	ODC1;SNORA80B	NM_002539;NR_028374	5'UTR;TSS1500	chr2:10587827-10589155	N_Shore			TRUE	0.522135	0.18287	-0.339264
cg02813268	37	2	10670665				chr2:10666541-10666765	S_Shelf				0.791429	0.533988	-0.257442
cg20096945	37	2	10856972									0.679908	0.357604	-0.322303
cg04200553	37	2	11117284									0.52424	0.212283	-0.311957
cg10123035	37	2	11343727	ROCK2	NM_004850	Body						0.728267	0.345581	-0.382686
cg27260958	37	2	11496920									0.78228	0.529881	-0.252398
cg17726575	37	2	11606945	E2F6;E2F6;E2F6;E2F6;E2F6	NR_003094;NR_003092;NR_003095;NM_198256;NR_003093	TSS1500;TSS1500;TSS1500;TSS1500;TSS1500	chr2:11605743-11606385	S_Shore			TRUE	0.638155	0.26466	-0.373495
cg23214755	37	2	11607042	E2F6;E2F6;E2F6;E2F6;E2F6	NR_003094;NR_003092;NR_003095;NM_198256;NR_003093	TSS1500;TSS1500;TSS1500;TSS1500;TSS1500	chr2:11605743-11606385	S_Shore			TRUE	0.79041	0.432574	-0.357836
cg27305320	37	2	11694506	GREB1;GREB1;GREB1	NM_033090;NM_014668;NM_148903	5'UTR;5'UTR;5'UTR						0.777972	0.508317	-0.269654
cg07362060	37	2	11915711	LPIN1;LPIN1;LPIN1;LPIN1	NM_001261429;NM_001261428;NM_001261427;NM_145693	Body;Body;Body;Body						0.651096	0.153642	-0.497454
cg16795263	37	2	11915747	LPIN1;LPIN1;LPIN1;LPIN1	NM_001261429;NM_001261428;NM_001261427;NM_145693	Body;Body;Body;Body						0.726889	0.188738	-0.538151
cg17290000	37	2	12085854									0.759264	0.500331	-0.258933
cg09049392	37	2	12197871	LOC100506457;LOC100506457;LOC100506457	NR_110198;NR_110197;NR_110196	Body;Body;Body						0.720405	0.42018	-0.300225
cg17251507	37	2	12214913	LOC100506457;LOC100506457;LOC100506457	NR_110198;NR_110197;NR_110196	Body;Body;Body						0.5565	0.295617	-0.260883
cg18874265	37	2	12411599	LOC100506457	NR_110196	Body						0.7361	0.482236	-0.253863
cg15103566	37	2	12443780	LOC100506457	NR_110196	Body						0.877863	0.557177	-0.320686
cg06959284	37	2	12642144	LOC100506457	NR_110196	Body						0.763127	0.50771	-0.255417
cg03384701	37	2	12643011	LOC100506457	NR_110196	Body						0.671512	0.327555	-0.343957
cg05238849	37	2	12697036	LOC100506457	NR_110196	Body						0.757266	0.432578	-0.324688
cg08635276	37	2	12997124									0.653565	0.315497	-0.338068
cg17883391	37	2	13791153									0.684216	0.401605	-0.28261
cg09141627	37	2	15378378	NBAS;NBAS	NR_052013;NM_015909	Body;Body						0.819351	0.564687	-0.254665
cg21872327	37	2	15451590	NBAS;NBAS	NR_052013;NM_015909	Body;Body						0.777597	0.462817	-0.31478
cg06756927	37	2	16499491									0.796898	0.484013	-0.312885
cg13397491	37	2	16835158	FAM49A	NM_030797	5'UTR				chr2:16835049-16835049		0.885971	0.626829	-0.259141
cg00250196	37	2	16836324	FAM49A	NM_030797	5'UTR				chr2:16835834-16835834		0.76114	0.484418	-0.276721
cg09324018	37	2	16839610	FAM49A	NM_030797	5'UTR				chr2:16839236-16839236	TRUE	0.810924	0.531696	-0.279228
cg19862974	37	2	18100326	KCNS3;KCNS3	NM_001282428;NM_002252	5'UTR;5'UTR						0.698351	0.355028	-0.343323
cg09596131	37	2	19986567								TRUE	0.776176	0.443116	-0.333059
cg17605007	37	2	20776435									0.916723	0.591079	-0.325644
cg00221794	37	2	20776620							chr2:20776456-20776456	TRUE	0.690889	0.254799	-0.43609
cg10149296	37	2	20795912							chr2:20795868-20795868	TRUE	0.900188	0.502284	-0.397904
cg01871867	37	2	20838317	HS1BP3	NM_022460	Body						0.801632	0.528353	-0.273279
cg23067459	37	2	20937367	LDAH;LDAH;LDAH;LDAH;LDAH;LDAH;LDAH;LDAH	NR_104233;NM_001282722;NM_001282721;NM_021925;NM_001282719;NM_001282720;NM_001282723;NM_001282724	Body;Body;Body;Body;Body;Body;Body;Body						0.738502	0.390596	-0.347906
cg20983265	37	2	21647170									0.890559	0.628549	-0.26201
cg15652717	37	2	21674505									0.661462	0.384825	-0.276637
cg01051003	37	2	23193506								TRUE	0.856274	0.599888	-0.256386
cg25432792	37	2	23546167								TRUE	0.660324	0.396572	-0.263752
cg12745003	37	2	23659593	KLHL29	NM_052920	5'UTR						0.661712	0.40295	-0.258762
cg21448352	37	2	23824291	KLHL29	NM_052920	Body						0.7667	0.495387	-0.271313
cg09853467	37	2	23824418	KLHL29	NM_052920	Body						0.722041	0.402383	-0.319658
cg21331367	37	2	25393977				chr2:25391072-25391875	S_Shelf				0.819525	0.51501	-0.304515
cg18169886	37	2	25517869	DNMT3A;DNMT3A;DNMT3A	NM_175629;NM_022552;NM_175630	Body;Body;Body				chr2:25517596-25517596		0.606007	0.311025	-0.294982
cg00050692	37	2	25524877	DNMT3A;DNMT3A;DNMT3A	NM_022552;NM_175630;NM_175629	Body;Body;Body					TRUE	0.814816	0.490332	-0.324484
cg02830178	37	2	25576057									0.887482	0.622567	-0.264916
cg23192403	37	2	25781496	DTNB;DTNB;DTNB;DTNB;DTNB	NM_183361;NM_033148;NM_183360;NM_033147;NM_021907	Body;Body;Body;Body;Body					TRUE	0.750392	0.360547	-0.389845
cg02510381	37	2	25815015	DTNB;DTNB;DTNB;DTNB;DTNB;DTNB;DTNB;DTNB	NM_001256308;NM_001256304;NM_183361;NM_021907;NM_001256303;NM_183360;NM_033148;NM_033147	Body;Body;Body;Body;Body;Body;Body;Body						0.82082	0.384154	-0.436665
cg06287667	37	2	26184003	KIF3C	NM_002254	Body						0.837104	0.555	-0.282105
cg10927841	37	2	26407743	FAM59B	NM_001168241	Body	chr2:26407422-26408253	Island			TRUE	0.423627	0.17234	-0.251286
cg17995197	37	2	26408167	FAM59B	NM_001168241	Body	chr2:26407422-26408253	Island			TRUE	0.5637	0.308706	-0.254994
cg09678539	37	2	27298343				chr2:27294139-27294915	S_Shelf			TRUE	0.658547	0.320801	-0.337746
cg23586138	37	2	27719544	FNDC4;GCKR	NM_022823;NM_001486	TSS1500;TSS200	chr2:27717681-27718337	S_Shore	low-CpG:27572968-27573256		TRUE	0.675174	0.423812	-0.251362
cg23065611	37	2	28417219	LOC100505736;BRE;BRE;BRE;BRE;BRE;BRE	NR_120504;NM_199193;NM_199192;NM_004899;NM_199194;NM_199191;NM_001261840	Body;Body;Body;Body;Body;Body;Body						0.666574	0.400151	-0.266423
cg22624902	37	2	28475342	BRE;BRE;BRE;BRE;BRE;BRE	NM_199193;NM_199192;NM_004899;NM_199194;NM_199191;NM_001261840	Body;Body;Body;Body;Body;Body						0.876222	0.609617	-0.266604
cg13116350	37	2	28686966							chr2:28686781-28686781		0.856166	0.569571	-0.286594
cg00444050	37	2	28809988	PLB1;PLB1	NM_001170585;NM_153021	Body;Body						0.861771	0.574577	-0.287194
cg08300512	37	2	28844643	PLB1;PLB1	NM_001170585;NM_153021	Body;Body				chr2:28844259-28844259		0.435606	0.0909704	-0.344636
cg15956680	37	2	29195923									0.698909	0.445679	-0.25323
cg25161377	37	2	29237783	FAM179A	NM_199280	Body						0.645083	0.307077	-0.338006
cg09420659	37	2	29689085	ALK	NM_004304	Body						0.867093	0.598667	-0.268426
cg01579114	37	2	30446683							chr2:30446574-30446574		0.787383	0.533346	-0.254037
cg18510160	37	2	30488615									0.612055	0.322769	-0.289285
cg18860449	37	2	30488769									0.659968	0.195152	-0.464816
cg25773272	37	2	30489169							chr2:30489009-30489009		0.639019	0.201823	-0.437196
cg20405062	37	2	30589477									0.706557	0.440932	-0.265625
cg19304003	37	2	30967383	CAPN13	NM_144575	Body					TRUE	0.800874	0.501066	-0.299808
cg19020602	37	2	30974108	CAPN13;CAPN13	NM_144575;NM_144575	ExonBnd;Body						0.855523	0.580792	-0.274731
cg11802689	37	2	31273288	GALNT14;GALNT14;GALNT14;GALNT14	NR_045602;NM_001253827;NM_024572;NM_001253826	Body;Body;Body;Body						0.653854	0.194269	-0.459585
cg15654650	37	2	31301889	GALNT14;GALNT14;GALNT14;GALNT14	NR_045602;NM_001253827;NM_024572;NM_001253826	Body;Body;Body;Body						0.600073	0.332958	-0.267116
cg23512079	37	2	31349757	GALNT14;GALNT14;GALNT14;GALNT14	NM_001253827;NR_045602;NM_024572;NM_001253826	5'UTR;Body;Body;Body						0.826499	0.539772	-0.286727
cg15941014	37	2	31439687	CAPN14	NM_001145122	5'UTR					TRUE	0.754264	0.441775	-0.312489
cg25521234	37	2	31444682									0.85765	0.546519	-0.31113
cg22893227	37	2	31541732							chr2:31541593-31541593		0.42254	0.171867	-0.250673
cg24956715	37	2	32157955	MEMO1;MEMO1;MEMO1;MEMO1;MEMO1;MEMO1	NM_001301852;NR_126032;NR_126034;NM_001137602;NM_015955;NM_001301833	5'UTR;Body;Body;Body;Body;Body						0.909309	0.592214	-0.317095
cg08652536	37	2	32490065	NLRC4;NLRC4;NLRC4;NLRC4	NM_001199138;NM_001199139;NM_021209;NM_001302504	TSS200;5'UTR;5'UTR;5'UTR						0.820913	0.546085	-0.274828
cg23839663	37	2	32817233	BIRC6	NM_016252	Body						0.694654	0.362063	-0.332591
cg06966738	37	2	32936376	TTC27;TTC27	NM_017735;NM_001193509	Body;Body						0.767636	0.50819	-0.259446
cg10582357	37	2	33090774	LINC00486	NR_027098	Body						0.657104	0.370288	-0.286815
cg14074534	37	2	33333102	LTBP1	NM_206943	Body						0.636337	0.259079	-0.377257
cg23597094	37	2	33335706	LTBP1	NM_206943	Body						0.681817	0.415934	-0.265883
cg10489463	37	2	33546572	LTBP1;LTBP1;LTBP1;LTBP1;LTBP1	NM_000627;NM_206943;NM_001166265;NM_001166266;NM_001166264	Body;Body;Body;Body;Body					TRUE	0.637447	0.369482	-0.267966
cg17012781	37	2	35047855							chr2:35047681-35047681		0.716326	0.447626	-0.2687
cg16423674	37	2	35635232									0.840614	0.472594	-0.36802
cg01166876	37	2	36018275								TRUE	0.71664	0.441011	-0.275629
cg26304948	37	2	36905302								TRUE	0.680268	0.375079	-0.305189
cg09037968	37	2	37828140							chr2:37827811-37827811		0.800309	0.406941	-0.393368
cg08080195	37	2	37875836	CDC42EP3	NM_006449	5'UTR				chr2:37875700-37875700	TRUE	0.581547	0.227744	-0.353802
cg16163382	37	2	37938640							chr2:37938546-37938546	TRUE	0.636762	0.306187	-0.330576
cg22530249	37	2	37940502									0.865172	0.58114	-0.284032
cg08980570	37	2	38056895	LINC00211;LINC00211	NR_110011;NR_110012	TSS200;Body						0.758704	0.47243	-0.286274
cg25063737	37	2	38078783	LINC00211	NR_110012	Body						0.666816	0.377882	-0.288934
cg21959490	37	2	38107801									0.384915	0.130411	-0.254504
cg04153193	37	2	38264963	RMDN2-AS1;RMDN2	NR_102712;NM_144713	TSS1500;Body						0.815173	0.377812	-0.437361
cg11183875	37	2	38341436							chr2:38341119-38341119		0.756083	0.46851	-0.287573
cg12081304	37	2	38346853									0.672308	0.413488	-0.25882
cg15496634	37	2	38373900	CYP1B1-AS1	NR_027252	Body				chr2:38373682-38373682		0.55036	0.237623	-0.312737
cg19029016	37	2	38373909	CYP1B1-AS1	NR_027252	Body				chr2:38373682-38373682		0.393765	0.120698	-0.273067
cg02893429	37	2	38404263	C2orf58	NR_027252	Body					TRUE	0.833483	0.493022	-0.340461
cg08839358	37	2	38528761	ATL2;ATL2;ATL2;ATL2	NR_024191;NM_001308076;NM_001135673;NM_022374	Body;Body;Body;Body						0.590466	0.297569	-0.292897
cg05190930	37	2	38701258	LOC101929596	NR_110259	Body						0.687759	0.305189	-0.38257
cg26336232	37	2	38838729									0.811255	0.379295	-0.43196
cg24480540	37	2	39356161									0.819747	0.305859	-0.513888
cg01433813	37	2	39719089	LOC728730	NR_037875	Body						0.824051	0.567127	-0.256924
cg01363860	37	2	39722009	LOC728730	NR_037875	Body				chr2:39722003-39722003		0.827371	0.513647	-0.313725
cg08170824	37	2	40406284	SLC8A1-AS1;SLC8A1;SLC8A1;SLC8A1;SLC8A1;SLC8A1	NR_038441;NM_001112801;NM_001112800;NM_001252624;NM_021097;NM_001112802	Body;Body;Body;Body;Body;Body						0.76958	0.366739	-0.402841
cg04453649	37	2	40579303	SLC8A1;SLC8A1;SLC8A1;SLC8A1;SLC8A1	NM_001112801;NM_001112800;NM_001252624;NM_021097;NM_001112802	Body;Body;Body;Body;Body						0.773413	0.509078	-0.264335
cg17419331	37	2	40734730	SLC8A1	NM_001112802	5'UTR						0.796585	0.461686	-0.334899
cg01051240	37	2	41963387							chr2:41963199-41963199		0.467712	0.118929	-0.348783
cg25002781	37	2	42166456								TRUE	0.639482	0.353967	-0.285515
cg00469310	37	2	42237305									0.709645	0.373338	-0.336307
cg14071298	37	2	42333048				chr2:42329439-42329653	S_Shelf		chr2:42333001-42333001		0.687002	0.373424	-0.313578
cg12093275	37	2	42483979	EML4;EML4	NM_001145076;NM_019063	Body;Body						0.850209	0.487464	-0.362745
cg18739675	37	2	43041125				chr2:43036978-43037638	S_Shelf			TRUE	0.894237	0.606206	-0.288031
cg16534850	37	2	43274088									0.737925	0.411904	-0.326021
cg05275732	37	2	43367147							chr2:43367145-43367145		0.658635	0.31372	-0.344915
cg12231532	37	2	43422434							chr2:43422005-43422005		0.786533	0.509798	-0.276735
cg01649611	37	2	43521066	THADA;THADA	NM_022065;NM_001083953	Body;Body					TRUE	0.422022	0.107853	-0.314169
cg01124297	37	2	43541916	THADA;THADA;THADA	NR_073394;NM_022065;NM_001083953	Body;Body;Body						0.619631	0.32323	-0.296401
cg22333841	37	2	43683048	THADA;THADA;THADA	NR_073394;NM_022065;NM_001083953	Body;Body;Body						0.451932	0.192384	-0.259549
cg24388610	37	2	43764517	THADA;THADA;THADA	NR_073394;NM_022065;NM_001083953	Body;Body;Body				chr2:43764398-43764398		0.772033	0.521366	-0.250667
cg25350169	37	2	44347690									0.413169	0.160604	-0.252566
cg12075011	37	2	44411547	PPM1B;PPM1B;PPM1B;PPM1B	NM_002706;NM_177968;NM_001033557;NM_177969	5'UTR;5'UTR;5'UTR;5'UTR						0.727712	0.380935	-0.346777
cg06595903	37	2	44585866	PREPL;PREPL;PREPL;PREPL;PREPL;PREPL;PREPL	NM_001171613;NM_001171617;NM_001042386;NM_001042385;NM_006036;NM_001171606;NM_001171603	5'UTR;5'UTR;Body;Body;Body;Body;Body	chr2:44588954-44589358	N_Shelf				0.643525	0.361579	-0.281946
cg26648203	37	2	45159457				chr2:45159893-45160112	N_Shore			TRUE	0.650262	0.359026	-0.291236
cg10281509	37	2	45238442				chr2:45240372-45241579	N_Shore			TRUE	0.69723	0.367598	-0.329632
cg05534247	37	2	45329680									0.567518	0.275829	-0.29169
cg01572940	37	2	45398381				chr2:45395869-45398186	S_Shore			TRUE	0.814968	0.560168	-0.254801
cg06133769	37	2	45405210	LINC01121	NR_033831	Body				chr2:45405025-45405025		0.554159	0.224952	-0.329207
cg01083804	37	2	45405216	LINC01121	NR_033831	Body				chr2:45405025-45405025		0.512763	0.24783	-0.264933
cg19061696	37	2	45581335								TRUE	0.749776	0.487265	-0.262511
cg11575507	37	2	45795183	SRBD1	NM_018079	Body						0.784533	0.261603	-0.52293
cg10892061	37	2	45795245	SRBD1	NM_018079	Body						0.677889	0.203116	-0.474774
cg08033142	37	2	46260367	PRKCE	NM_005400	Body						0.898318	0.637143	-0.261174
cg24661126	37	2	46295385	PRKCE	NM_005400	Body						0.774017	0.509875	-0.264142
cg18995493	37	2	46495571									0.58803	0.280431	-0.307599
cg11824898	37	2	46500633									0.883973	0.629484	-0.25449
cg20397360	37	2	46578905	EPAS1	NM_001430	Body						0.843616	0.513271	-0.330345
cg06735913	37	2	47041502							chr2:47041376-47041376		0.492838	0.140098	-0.352741
cg22013055	37	2	47054833	LOC100134259	NR_024452	TSS200					TRUE	0.781013	0.478101	-0.302913
cg27485075	37	2	47054963	LOC100134259	NR_024452	TSS200					TRUE	0.813814	0.539131	-0.274682
cg02034951	37	2	47086248									0.818783	0.512098	-0.306685
cg01312394	37	2	47109380							chr2:47109327-47109327	TRUE	0.746867	0.41422	-0.332647
cg12183760	37	2	47298803	TTC7A;TTC7A;TTC7A;TTC7A	NM_001288955;NM_001288953;NM_001288951;NM_020458	Body;Body;Body;Body				chr2:47298687-47298687		0.402746	0.130845	-0.271901
cg09464466	37	2	47500335				chr2:47499464-47499813	S_Shore			TRUE	0.782129	0.460023	-0.322106
cg21363876	37	2	47916819				chr2:47917888-47918414	N_Shore				0.778963	0.402558	-0.376405
cg23916780	37	2	48540893	FOXN2	NM_002158	TSS1500	chr2:48541252-48542587	N_Shore				0.516808	0.145899	-0.370909
cg14965639	37	2	48795994	STON1-GTF2A1L	NM_172311	TSS200					TRUE	0.779692	0.510476	-0.269216
cg03390090	37	2	49295262	FSHR;FSHR	NM_000145;NM_181446	Body;Body						0.761257	0.4693	-0.291957
cg16575075	37	2	52600101									0.681553	0.384653	-0.2969
cg24343809	37	2	53145796									0.773658	0.499356	-0.274302
cg08238664	37	2	54222062							chr2:54221958-54221958		0.870847	0.537705	-0.333142
cg06001734	37	2	54467214	ACYP2	NM_138448	Body					TRUE	0.785677	0.51414	-0.271537
cg20095949	37	2	54657317									0.59641	0.234124	-0.362286
cg12330259	37	2	54730464	SPTBN1	NM_003128	5'UTR						0.824966	0.528288	-0.296677
cg09465516	37	2	54751985	SPTBN1	NM_003128	5'UTR				chr2:54751942-54751942		0.596841	0.28664	-0.310201
cg06149826	37	2	54800117	SPTBN1;SPTBN1	NM_003128;NM_178313	Body;Body				chr2:54800045-54800045		0.669658	0.346867	-0.322791
cg11288670	37	2	54823611	SPTBN1;SPTBN1	NM_003128;NM_178313	Body;Body						0.598189	0.277973	-0.320216
cg15928680	37	2	54823768	SPTBN1;SPTBN1	NM_178313;NM_003128	Body;Body					TRUE	0.581462	0.299609	-0.281854
cg22213014	37	2	55455348	CLHC1;CLHC1;CLHC1	NM_152385;NM_152385;NM_001135598	5'UTR;ExonBnd;5'UTR						0.603157	0.337111	-0.266046
cg18958844	37	2	55509779	PRDXDD1P	NR_027258	Body	chr2:55509233-55509720	S_Shore			TRUE	0.341789	0.064046	-0.277743
cg07999476	37	2	55509943	PRORSD1P	NR_027258	Body	chr2:55509233-55509720	S_Shore				0.618452	0.147306	-0.471146
cg08845659	37	2	55727415									0.59336	0.337479	-0.255881
cg14237297	37	2	56212745	MIR217HG	NR_126406	Body						0.741407	0.366837	-0.374571
cg01815259	37	2	56317578									0.583505	0.330549	-0.252956
cg12304413	37	2	57777019									0.770463	0.50988	-0.260583
cg09858955	37	2	58135951	VRK2;VRK2	NM_001288838;NM_001288837	5'UTR;5'UTR				chr2:58135925-58135925		0.730536	0.398054	-0.332481
cg12190917	37	2	58250834	VRK2;VRK2	NM_001288838;NM_001288837	5'UTR;5'UTR						0.847752	0.475243	-0.37251
cg17357341	37	2	58603854									0.755403	0.443455	-0.311948
cg06863358	37	2	58929013	LINC01122	NR_033873	Body						0.851865	0.591	-0.260865
cg11494157	37	2	58959133	LINC01122	NR_033873	Body						0.702313	0.364444	-0.337869
cg03792582	37	2	58985397	LINC01122	NR_033873	Body						0.704539	0.377536	-0.327003
cg22363368	37	2	59126860								TRUE	0.738104	0.409458	-0.328647
cg02707558	37	2	59252488	LINC01122	NR_033873	Body						0.528516	0.269693	-0.258823
cg12958892	37	2	59444755	LOC101927285	NR_110219	TSS200						0.870013	0.560579	-0.309434
cg02582218	37	2	59569659								TRUE	0.742429	0.447282	-0.295147
cg17788011	37	2	60618555									0.871313	0.507873	-0.36344
cg11537677	37	2	60618604									0.860819	0.54255	-0.318269
cg15880090	37	2	60627671									0.853219	0.557229	-0.29599
cg12046157	37	2	60641168									0.8538	0.591747	-0.262054
cg17753356	37	2	60711641	BCL11A;BCL11A;BCL11A	NM_022893;NM_138559;NM_018014	Body;Body;Body					TRUE	0.545271	0.293961	-0.25131
cg17266406	37	2	60743021	BCL11A;BCL11A;BCL11A	NM_022893;NM_138559;NM_018014	Body;Body;Body				chr2:60742807-60742807		0.806994	0.427712	-0.379282
cg06350121	37	2	61024384	PAPOLG	NM_022894	3'UTR						0.810671	0.548206	-0.262465
cg03079981	37	2	61068167									0.60069	0.338255	-0.262434
cg07549302	37	2	61068178									0.41641	0.16433	-0.25208
cg08114120	37	2	61164674									0.64947	0.390884	-0.258586
cg21655992	37	2	61465487	USP34	NM_014709	Body						0.863508	0.548625	-0.314883
cg06854882	37	2	61646507	USP34	NM_014709	Body						0.670593	0.416775	-0.253818
cg22154735	37	2	61916869							chr2:61916853-61916853		0.487305	0.175742	-0.311562
cg12855224	37	2	61955041									0.613755	0.302817	-0.310938
cg11102682	37	2	62266795	COMMD1	NM_152516	Body						0.908331	0.640914	-0.267418
cg23461448	37	2	62541312									0.885149	0.59688	-0.28827
cg27364741	37	2	63281069	OTX1	NM_014562	Body	chr2:63281034-63281347	Island			TRUE	0.621184	0.339419	-0.281765
cg25622366	37	2	63281139	OTX1	NM_014562	Body	chr2:63281034-63281347	Island			TRUE	0.55649	0.247521	-0.308969
cg03655683	37	2	63281383	OTX1	NM_014562	Body	chr2:63282514-63283122	N_Shore			TRUE	0.475851	0.178867	-0.296984
cg04654530	37	2	63282702	OTX1	NM_014562	Body	chr2:63282514-63283122	Island			TRUE	0.566066	0.286771	-0.279295
cg08473330	37	2	63282883	OTX1	NM_014562	Body	chr2:63282514-63283122	Island			TRUE	0.559937	0.281414	-0.278523
cg07974511	37	2	63283013	OTX1	NM_014562	Body	chr2:63282514-63283122	Island			TRUE	0.632686	0.328168	-0.304517
cg07938743	37	2	63283939	OTX1	NM_014562	3'UTR	chr2:63283936-63284147	Island			TRUE	0.714787	0.374713	-0.340074
cg21472506	37	2	63283967	OTX1	NM_014562	3'UTR	chr2:63283936-63284147	Island			TRUE	0.529142	0.163212	-0.36593
cg23229261	37	2	63284066	OTX1	NM_014562	3'UTR	chr2:63283936-63284147	Island			TRUE	0.528632	0.208876	-0.319756
cg10122865	37	2	63284132	OTX1	NM_014562	3'UTR	chr2:63283936-63284147	Island			TRUE	0.542158	0.198503	-0.343655
cg25371919	37	2	63284481				chr2:63285949-63287097	N_Shore			TRUE	0.666495	0.344713	-0.321782
cg19763461	37	2	63284557				chr2:63285949-63287097	N_Shore			TRUE	0.556829	0.200288	-0.356542
cg22249789	37	2	63284574				chr2:63285949-63287097	N_Shore			TRUE	0.512452	0.237469	-0.274983
cg05092308	37	2	63285365				chr2:63285949-63287097	N_Shore			TRUE	0.562127	0.175148	-0.386979
cg19351026	37	2	63285425				chr2:63285949-63287097	N_Shore			TRUE	0.426044	0.107148	-0.318895
cg04371726	37	2	63285645				chr2:63285949-63287097	N_Shore		chr2:63285480-63285480	TRUE	0.486434	0.158546	-0.327887
cg18947951	37	2	63285739				chr2:63285949-63287097	N_Shore		chr2:63285480-63285480	TRUE	0.529675	0.1374	-0.392274
cg07617338	37	2	63285846				chr2:63285949-63287097	N_Shore	low-CpG:63139348-63139351	chr2:63285480-63285480	TRUE	0.515801	0.250799	-0.265002
cg27315333	37	2	63285950				chr2:63285949-63287097	Island			TRUE	0.522144	0.212124	-0.310019
cg11536474	37	2	63286049				chr2:63285949-63287097	Island			TRUE	0.606525	0.310846	-0.295679
cg10839272	37	2	64450285							chr2:64450212-64450212		0.641613	0.312996	-0.328617
cg02697127	37	2	64628677									0.739483	0.474575	-0.264907
cg23780193	37	2	64926154							chr2:64925964-64925964		0.508372	0.18503	-0.323342
cg03090940	37	2	65058954								TRUE	0.464272	0.106659	-0.357613
cg16254690	37	2	65059209									0.839744	0.5375	-0.302245
cg07104583	37	2	65459346	ACTR2;ACTR2	NM_001005386;NM_005722	Body;Body	chr2:65454553-65455444	S_Shelf				0.834435	0.550496	-0.283939
cg04617267	37	2	65460005	ACTR2;ACTR2	NM_001005386;NM_005722	Body;Body						0.723021	0.377043	-0.345978
cg07310500	37	2	65528222								TRUE	0.512005	0.223554	-0.288451
cg07096238	37	2	66589902								TRUE	0.720092	0.467846	-0.252247
cg00995986	37	2	66665428	MEIS1	NM_002398	Body	chr2:66661118-66661657	S_Shelf			TRUE	0.595188	0.30294	-0.292248
cg16758314	37	2	66666267	MEIS1-AS2;MEIS1	NR_046625;NM_002398	Body;Body	chr2:66662042-66662338	S_Shelf				0.596647	0.328132	-0.268514
cg02029212	37	2	66666352	MEIS1-AS2;MEIS1	NR_046625;NM_002398	Body;Body						0.457816	0.13169	-0.326126
cg09462924	37	2	66666470	MEIS1	NM_002398	Body					TRUE	0.654657	0.225571	-0.429087
cg23497016	37	2	66666684	MEIS1	NM_002398	Body					TRUE	0.404932	0.119636	-0.285296
cg23972738	37	2	66667039	MEIS1	NM_002398	Body					TRUE	0.539992	0.238115	-0.301877
cg16178603	37	2	66667101	MEIS1	NM_002398	Body					TRUE	0.590307	0.163774	-0.426533
cg17945976	37	2	66667433	MEIS1	NM_002398	Body					TRUE	0.500353	0.0944141	-0.405939
cg11313446	37	2	66667461	MEIS1-AS2;MEIS1	NR_046625;NM_002398	Body;Body						0.453785	0.101985	-0.3518
cg24511951	37	2	66667536	MEIS1-AS2;MEIS1	NR_046625;NM_002398	TSS200;Body						0.493554	0.110415	-0.383139
cg11433622	37	2	66667549	MEIS1	NM_002398	Body					TRUE	0.57383	0.112303	-0.461527
cg04288999	37	2	66667852	MEIS1	NM_002398	Body					TRUE	0.479186	0.154666	-0.32452
cg05877497	37	2	66667946	MEIS1	NM_002398	Body					TRUE	0.66938	0.385363	-0.284017
cg12895717	37	2	66796692	MEIS1	NM_002398	3'UTR						0.82461	0.451589	-0.373021
cg02335251	37	2	66801399				chr2:66802890-66804831	N_Shore			TRUE	0.776238	0.475108	-0.30113
cg03624133	37	2	66976210									0.559352	0.264429	-0.294923
cg01085569	37	2	66982917								TRUE	0.848619	0.574221	-0.274398
cg04904480	37	2	67267193									0.79025	0.448666	-0.341584
cg21699194	37	2	67791398							chr2:67791335-67791335		0.779748	0.473166	-0.306583
cg01986232	37	2	67844179									0.748293	0.231654	-0.516639
cg05630858	37	2	68003590									0.879951	0.600398	-0.279553
cg13139361	37	2	68009681								TRUE	0.731328	0.429415	-0.301913
cg04872689	37	2	68592375	PLEK;PLEK	NM_002664;NM_002664	1stExon;5'UTR			low-CpG:68445821-68445987		TRUE	0.763869	0.500485	-0.263384
cg10812236	37	2	68592394	PLEK;PLEK	NM_002664;NM_002664	1stExon;5'UTR			low-CpG:68445821-68445987		TRUE	0.767073	0.51278	-0.254293
cg13029130	37	2	68593246	PLEK	NM_002664	Body						0.837237	0.527834	-0.309403
cg09951720	37	2	68651081							chr2:68651029-68651029		0.621874	0.335266	-0.286608
cg02722539	37	2	68654573							chr2:68654356-68654356		0.714662	0.36187	-0.352792
cg04260590	37	2	68917528									0.622759	0.348626	-0.274133
cg18937354	37	2	68943968									0.766874	0.480161	-0.286713
cg09831549	37	2	68947188									0.861748	0.555868	-0.305881
cg17321346	37	2	68954175									0.736872	0.414648	-0.322223
cg22553423	37	2	68961955	ARHGAP25;ARHGAP25;ARHGAP25;ARHGAP25	NM_001166277;NM_001007231;NM_001166277;NM_001007231	5'UTR;5'UTR;1stExon;1stExon						0.546024	0.238177	-0.307847
cg15477363	37	2	68961987	ARHGAP25;ARHGAP25;ARHGAP25;ARHGAP25	NM_001166277;NM_001166277;NM_001007231;NM_001007231	5'UTR;1stExon;1stExon;5'UTR					TRUE	0.761257	0.442971	-0.318287
cg09721047	37	2	68962012	ARHGAP25;ARHGAP25;ARHGAP25;ARHGAP25	NM_001166277;NM_001166277;NM_001007231;NM_001007231	5'UTR;1stExon;1stExon;5'UTR					TRUE	0.720419	0.397629	-0.32279
cg13575601	37	2	68962431	ARHGAP25;ARHGAP25	NM_001166277;NM_001007231	Body;Body						0.787773	0.504626	-0.283147
cg22010271	37	2	68990227	ARHGAP25;ARHGAP25	NM_001166277;NM_001007231	Body;Body				chr2:68989889-68989889		0.60599	0.342536	-0.263454
cg08684834	37	2	68994403	ARHGAP25;ARHGAP25	NM_001166277;NM_001007231	Body;Body				chr2:68994240-68994240		0.8003	0.513269	-0.287032
cg22262670	37	2	68994821	ARHGAP25;ARHGAP25	NM_001166277;NM_001007231	Body;Body				chr2:68994705-68994705		0.869886	0.507535	-0.362351
cg13854135	37	2	68997641	ARHGAP25;ARHGAP25	NM_001166277;NM_001007231	Body;Body				chr2:68997602-68997602		0.778099	0.482838	-0.295261
cg23842341	37	2	68998594	ARHGAP25;ARHGAP25	NM_001166277;NM_001007231	Body;Body						0.51094	0.260322	-0.250618
cg23801982	37	2	69001624	ARHGAP25;ARHGAP25;ARHGAP25;ARHGAP25	NM_014882;NM_001166276;NM_001166277;NM_001007231	TSS1500;TSS1500;Body;Body						0.57268	0.309457	-0.263223
cg07780630	37	2	69001665	ARHGAP25;ARHGAP25;ARHGAP25;ARHGAP25	NM_001166276;NM_001007231;NM_001166277;NM_014882	TSS1500;Body;Body;TSS1500					TRUE	0.822363	0.455368	-0.366995
cg27278086	37	2	69001774	ARHGAP25;ARHGAP25;ARHGAP25;ARHGAP25	NM_001007231;NM_014882;NM_001166276;NM_001166277	Body;TSS200;TSS200;Body					TRUE	0.642581	0.316951	-0.32563
cg15361661	37	2	69001815	ARHGAP25;ARHGAP25;ARHGAP25;ARHGAP25	NM_001007231;NM_014882;NM_001166276;NM_001166277	Body;TSS200;TSS200;Body					TRUE	0.621662	0.351701	-0.26996
cg26238936	37	2	69001854	ARHGAP25;ARHGAP25;ARHGAP25;ARHGAP25	NM_001007231;NM_014882;NM_001166276;NM_001166277	Body;TSS200;TSS200;Body					TRUE	0.667962	0.391015	-0.276947
cg24204210	37	2	69002244	ARHGAP25;ARHGAP25;ARHGAP25;ARHGAP25;ARHGAP25;ARHGAP25	NM_014882;NM_001166276;NM_014882;NM_001166276;NM_001166277;NM_001007231	5'UTR;5'UTR;1stExon;1stExon;Body;Body						0.721443	0.411019	-0.310424
cg05395210	37	2	69002378	ARHGAP25;ARHGAP25;ARHGAP25;ARHGAP25	NM_001007231;NM_014882;NM_001166276;NM_001166277	Body;1stExon;1stExon;Body					TRUE	0.639341	0.364546	-0.274795
cg04645527	37	2	69023542	ARHGAP25;ARHGAP25;ARHGAP25;ARHGAP25	NM_001166277;NM_001007231;NM_014882;NM_001166276	Body;Body;Body;Body						0.503508	0.236513	-0.266995
cg03879808	37	2	69140146									0.710366	0.455963	-0.254403
cg26137190	37	2	69453290	ANTXR1	NM_032208	Body						0.81036	0.452943	-0.357416
cg15220530	37	2	69847109	AAK1	NM_014911	Body						0.803201	0.445044	-0.358156
cg27017261	37	2	69855567	AAK1	NM_014911	Body						0.850436	0.574613	-0.275823
cg04938591	37	2	69921397									0.819821	0.450154	-0.369667
cg16496571	37	2	70161565	MXD1;MXD1;MXD1	NM_001202514;NM_001202513;NM_002357	Body;Body;Body						0.766278	0.441476	-0.324802
cg26577523	37	2	70270826	PCBP1-AS1	NR_033872	Body				chr2:70270545-70270545		0.835061	0.539352	-0.29571
cg26649957	37	2	71079146							chr2:71078987-71078987		0.505424	0.222585	-0.28284
cg13319542	37	2	71580473	ZNF638;ZNF638;ZNF638;ZNF638	NM_014497;NM_001252612;NM_001014972;NM_001252613	Body;Body;Body;Body						0.816032	0.439667	-0.376365
cg27171156	37	2	71698651	DYSF;DYSF;DYSF;DYSF;DYSF;DYSF;DYSF;DYSF;DYSF;DYSF;DYSF;DYSF;DYSF;DYSF	NM_001130981;NM_001130976;NM_003494;NM_001130977;NM_001130979;NM_001130978;NM_001130980;NM_001130983;NM_001130985;NM_001130455;NM_001130984;NM_001130987;NM_001130986;NM_001130982	Body;Body;Body;Body;Body;Body;Body;Body;Body;Body;Body;Body;Body;Body						0.704406	0.379849	-0.324556
cg06103237	37	2	72169188									0.752496	0.458013	-0.294483
cg20736849	37	2	73902031	ALMS1P;ALMS1P	NR_003683;NR_003683	ExonBnd;Body						0.654119	0.356055	-0.298064
cg14377032	37	2	74758236	AUP1;AUP1;AUP1;HTRA2;HTRA2;HTRA2	NM_181575;NR_126511;NR_126510;NM_013247;NM_145074;NM_013247	TSS1500;TSS1500;TSS1500;Body;Body;ExonBnd	chr2:74756223-74757930	S_Shore				0.606688	0.29757	-0.309118
cg04009045	37	2	74804817	M1AP;M1AP;M1AP	NM_138804;NM_001281296;NM_001281295	Body;Body;Body						0.577905	0.174357	-0.403548
cg14619767	37	2	74804922	M1AP;M1AP;M1AP	NM_138804;NM_001281296;NM_001281295	Body;Body;Body				chr2:74804828-74804828		0.515408	0.213055	-0.302352
cg15025240	37	2	74811430	C2orf65	NM_138804	Body					TRUE	0.761017	0.356506	-0.404511
cg12147485	37	2	75730570	EVA1A;EVA1A	NM_032181;NM_001135032	Body;Body						0.465538	0.190844	-0.274693
cg04482519	37	2	77212535	LOC101927907;LRRTM4;LRRTM4	NR_110284;NM_001282924;NM_001134745	TSS1500;Body;Body						0.659344	0.367285	-0.292059
cg08769137	37	2	79204959									0.725249	0.457304	-0.267945
cg17736982	37	2	80472009	CTNNA2;CTNNA2;CTNNA2;CTNNA2	NM_001282598;NM_001164883;NM_004389;NM_001282597	Body;Body;Body;Body						0.763848	0.460759	-0.303089
cg00720065	37	2	84219016									0.74711	0.452693	-0.294417
cg00817355	37	2	85073409	TRABD2A;TRABD2A;TRABD2A	NM_001080824;NM_001277053;NM_001307978	Body;Body;Body				chr2:85073100-85073100		0.497766	0.126538	-0.371228
cg13587572	37	2	85073549	TRABD2A;TRABD2A;TRABD2A	NM_001080824;NM_001277053;NM_001307978	Body;Body;Body						0.582637	0.279171	-0.303466
cg25325322	37	2	85073715	C2orf89	NM_001080824	Body					TRUE	0.86389	0.500401	-0.363489
cg06963182	37	2	85122086								TRUE	0.596772	0.256629	-0.340143
cg15034300	37	2	85134468				chr2:85132338-85133083	S_Shore			TRUE	0.350763	0.0815362	-0.269227
cg00642274	37	2	85633015	CAPG;CAPG;CAPG	NM_001747;NM_001256140;NM_001256139	5'UTR;5'UTR;5'UTR				chr2:85632531-85632531		0.718221	0.441206	-0.277015
cg11651615	37	2	85667381				chr2:85664694-85665055	S_Shelf			TRUE	0.941857	0.671123	-0.270734
cg23921113	37	2	85811236	VAMP5	NM_006634	TSS1500	chr2:85811340-85811855	N_Shore				0.57581	0.285408	-0.290402
cg20586169	37	2	85855952	USP39;USP39;USP39;USP39;USP39;USP39	NR_046347;NM_001256727;NM_001256728;NM_001256726;NM_001256725;NM_006590	Body;Body;Body;Body;Body;Body						0.708074	0.423654	-0.284419
cg21512179	37	2	85971548								TRUE	0.581383	0.323161	-0.258221
cg05546847	37	2	85975173									0.82686	0.523797	-0.303063
cg15453986	37	2	86080495	ST3GAL5;ST3GAL5	NM_001042437;NM_003896	Body;Body						0.62135	0.173094	-0.448256
cg16827313	37	2	86221193							chr2:86221169-86221169		0.561479	0.188809	-0.37267
cg11406521	37	2	86226603							chr2:86226191-86226191		0.453798	0.197226	-0.256572
cg04915044	37	2	86263895	POLR1A	NM_015425	Body					TRUE	0.549793	0.148069	-0.401725
cg18532481	37	2	86264388	POLR1A	NM_015425	Body						0.433275	0.149126	-0.284149
cg05968833	37	2	86266051	POLR1A	NM_015425	Body						0.897785	0.645356	-0.252429
cg03551377	37	2	86424249	IMMT;IMMT;IMMT	NM_001100170;NM_006839;NM_001100169	TSS1500;TSS1500;TSS1500	chr2:86422068-86422858	S_Shore				0.85484	0.442587	-0.412253
cg15818003	37	2	86855600	RNF103-CHMP3	NM_001198954	5'UTR						0.805019	0.528496	-0.276522
cg16010111	37	2	87769369	LINC00152;LINC00152;LINC00152	NR_024205;NR_024206;NR_024204	Body;Body;Body						0.682381	0.429025	-0.253356
cg17877772	37	2	87797971	LINC00152;LINC00152;LINC00152	NR_024205;NR_024206;NR_024204	Body;Body;Body						0.698911	0.347185	-0.351726
cg00831051	37	2	87817784	LINC00152;LINC00152;LINC00152	NR_024205;NR_024206;NR_024204	Body;Body;Body						0.84015	0.55757	-0.28258
cg09726569	37	2	88606805									0.780994	0.478235	-0.302758
cg07246517	37	2	89975048									0.575164	0.297226	-0.277938
cg07106169	37	2	95740362				chr2:95742594-95742918	N_Shelf			TRUE	0.693653	0.376303	-0.317351
cg25428740	37	2	96981671								TRUE	0.591026	0.306209	-0.284818
cg19954537	37	2	97204401	ARID5A	NM_212481	Body	chr2:97202313-97203787	S_Shore			TRUE	0.556697	0.230557	-0.32614
cg13112407	37	2	97204931	ARID5A	NM_212481	Body	chr2:97202313-97203787	S_Shore			TRUE	0.70401	0.42992	-0.27409
cg09694782	37	2	97408799				chr2:97405448-97405880	S_Shelf			TRUE	0.736036	0.441896	-0.29414
cg17415382	37	2	97472472	CNNM4	NM_020184	Body				chr2:97472369-97472369		0.690279	0.36362	-0.326659
cg12332902	37	2	98330020	ZAP70	NM_001079	TSS200					TRUE	0.681807	0.429075	-0.252732
cg07536737	37	2	98630091								TRUE	0.801654	0.512088	-0.289566
cg27046573	37	2	98698577									0.504852	0.138279	-0.366573
cg16408856	37	2	98808235	VWA3B	NM_144992	Body					TRUE	0.628155	0.366247	-0.261908
cg12221689	37	2	98827983	VWA3B	NM_144992	Body					TRUE	0.75746	0.497345	-0.260115
cg26106837	37	2	99029445									0.67375	0.283459	-0.390291
cg09365107	37	2	99055444							chr2:99055342-99055342		0.609072	0.333243	-0.27583
cg22742992	37	2	99077511	INPP4A;INPP4A;INPP4A;INPP4A	NM_004027;NM_001134224;NM_001566;NM_001134225	5'UTR;5'UTR;5'UTR;5'UTR				chr2:99077455-99077455		0.715356	0.441583	-0.273773
cg11555067	37	2	99081350	INPP4A;INPP4A;INPP4A;INPP4A	NM_001566;NM_004027;NM_001134224;NM_001134225	5'UTR;5'UTR;5'UTR;5'UTR					TRUE	0.863228	0.567561	-0.295667
cg25442666	37	2	99081505	INPP4A;INPP4A;INPP4A;INPP4A	NM_004027;NM_001134224;NM_001566;NM_001134225	5'UTR;5'UTR;5'UTR;5'UTR				chr2:99081402-99081402		0.613853	0.22967	-0.384183
cg21001907	37	2	99125273	INPP4A;INPP4A;INPP4A;INPP4A	NM_004027;NM_001134224;NM_001566;NM_001134225	5'UTR;5'UTR;5'UTR;5'UTR						0.711451	0.455173	-0.256278
cg23432480	37	2	99125292	INPP4A;INPP4A;INPP4A;INPP4A	NM_004027;NM_001134224;NM_001566;NM_001134225	5'UTR;5'UTR;5'UTR;5'UTR				chr2:99125275-99125275		0.788608	0.522949	-0.265659
cg04590464	37	2	99330348	MGAT4A	NM_012214	Body						0.812459	0.500069	-0.31239
cg15012027	37	2	99351550				chr2:99346882-99348177	S_Shelf			TRUE	0.848606	0.509831	-0.338775
cg11867489	37	2	99388233	LOC101927070	NR_126337	Body						0.649323	0.342237	-0.307086
cg16756868	37	2	99388637	LOC101927070	NR_126337	TSS1500						0.682707	0.365666	-0.317041
cg07349094	37	2	100759014	AFF3;AFF3	NM_002285;NM_002285	1stExon;5'UTR			low-CpG:100125418-100125502		TRUE	0.870893	0.515757	-0.355136
cg06183267	37	2	100759134	AFF3	NM_002285	TSS200					TRUE	0.818259	0.428659	-0.3896
cg23497683	37	2	100759159	AFF3	NM_002285	TSS200					TRUE	0.780172	0.367296	-0.412876
cg06083624	37	2	101197565							chr2:101197262-101197262		0.650832	0.360743	-0.290089
cg25628433	37	2	101541328	NPAS2	NM_002518	Body					TRUE	0.645466	0.318261	-0.327206
cg15308037	37	2	101541372	NPAS2	NM_002518	Body						0.781146	0.388633	-0.392513
cg19986909	37	2	101541471	NPAS2	NM_002518	Body						0.815671	0.44351	-0.372161
cg12878044	37	2	101541568	NPAS2	NM_002518	Body						0.743692	0.453417	-0.290275
cg26281470	37	2	101541592	NPAS2;NPAS2	NM_002518;NM_002518	ExonBnd;Body						0.762027	0.399467	-0.36256
cg19652019	37	2	101790485							chr2:101790359-101790359		0.742472	0.409612	-0.33286
cg13520013	37	2	101840500									0.430255	0.12423	-0.306025
cg13647520	37	2	102058574	RFX8	NM_001145664	Body				chr2:102058393-102058393		0.660867	0.285558	-0.37531
cg18701870	37	2	102063454	RFX8	NM_001145664	Body				chr2:102063368-102063368		0.74267	0.448053	-0.294617
cg10462143	37	2	102091675	RFX8	NM_001145664	TSS1500	chr2:102090370-102091130	S_Shore				0.509403	0.152024	-0.357379
cg27510024	37	2	102091755	RFX8	NM_001145664	TSS1500	chr2:102090370-102091130	S_Shore				0.509306	0.217293	-0.292013
cg15840891	37	2	102133972							chr2:102133779-102133779	TRUE	0.476097	0.102022	-0.374075
cg21322862	37	2	102292024									0.801784	0.446387	-0.355397
cg21745456	37	2	102332995	MAP4K4;MAP4K4;MAP4K4;MAP4K4;MAP4K4	NM_145687;NM_145686;NM_001242559;NM_004834;NM_001242560	Body;Body;Body;Body;Body				chr2:102332970-102332970		0.82524	0.544349	-0.280891
cg23608915	37	2	102333795	MAP4K4;MAP4K4;MAP4K4;MAP4K4;MAP4K4	NM_145687;NM_145686;NM_001242559;NM_004834;NM_001242560	Body;Body;Body;Body;Body				chr2:102333492-102333492		0.892743	0.629491	-0.263251
cg03151645	37	2	102517122									0.789506	0.528894	-0.260612
cg03224621	37	2	102699286								TRUE	0.608873	0.217112	-0.391761
cg07164224	37	2	102699532	IL1R1	NM_001288706	5'UTR				chr2:102699368-102699368		0.542633	0.178689	-0.363944
cg05539265	37	2	102717438								TRUE	0.839817	0.563165	-0.276652
cg00790071	37	2	102731407								TRUE	0.78163	0.485664	-0.295966
cg19799762	37	2	102755019	IL1R1	NM_001288706	5'UTR	chr2:102758806-102759577	N_Shelf				0.827268	0.427932	-0.399336
cg26556684	37	2	102764618	IL1R1;IL1R1	NM_001288706;NM_000877	5'UTR;5'UTR						0.78398	0.386891	-0.397089
cg08552853	37	2	102875372							chr2:102874948-102874948		0.881172	0.413858	-0.467314
cg21362413	37	2	102920965							chr2:102920800-102920800		0.671232	0.368717	-0.302516
cg20060108	37	2	102954350	IL1RL1;IL1RL1	NM_003856;NM_016232	5'UTR;5'UTR					TRUE	0.770439	0.513001	-0.257438
cg18156583	37	2	103035227	IL18RAP	NM_003853	TSS200						0.837703	0.447706	-0.389997
cg21567756	37	2	103041487	IL18RAP	NM_003853	Body				chr2:103041346-103041346		0.505927	0.239121	-0.266806
cg21020906	37	2	105591993	LOC102724691	NR_110603	Body						0.642038	0.382857	-0.259181
cg02289045	37	2	105593190	LOC102724691	NR_110603	Body						0.520299	0.245397	-0.274902
cg03884924	37	2	106355341							chr2:106355263-106355263		0.803516	0.42857	-0.374947
cg22765178	37	2	106378429	NCK2;NCK2	NM_003581;NM_001004722	5'UTR;5'UTR					TRUE	0.843664	0.593577	-0.250086
cg20273931	37	2	106490359	NCK2;NCK2;NCK2	NM_001004722;NM_003581;NM_001004720	Body;Body;Body				chr2:106490273-106490273		0.566945	0.183977	-0.382968
cg02746044	37	2	106521576									0.896493	0.528446	-0.368047
cg01113409	37	2	106546089									0.54283	0.210022	-0.332807
cg16828023	37	2	106690182	C2orf40	NM_032411	Body						0.673742	0.393894	-0.279848
cg00733767	37	2	106757574	UXS1;UXS1;UXS1	NR_045607;NM_001253875;NM_025076	Body;Body;Body						0.811632	0.517924	-0.293707
cg11732505	37	2	106776571	UXS1;UXS1;UXS1	NR_045607;NM_001253875;NM_025076	Body;Body;Body						0.733693	0.468299	-0.265395
cg23362669	37	2	106776913	UXS1	NM_025076	Body					TRUE	0.493324	0.160237	-0.333088
cg21227035	37	2	106777015	UXS1;UXS1;UXS1	NR_045607;NM_001253875;NM_025076	Body;Body;Body						0.742972	0.406419	-0.336553
cg00118342	37	2	106777038	UXS1	NM_025076	Body					TRUE	0.771044	0.415531	-0.355513
cg17160687	37	2	106777215	UXS1;UXS1;UXS1	NR_045607;NM_001253875;NM_025076	Body;Body;Body						0.816707	0.472441	-0.344265
cg06351682	37	2	106974831								TRUE	0.741144	0.414751	-0.326394
cg07363676	37	2	108208768								TRUE	0.484124	0.224916	-0.259209
cg11405542	37	2	108921653	SULT1C2;SULT1C2	NM_001056;NM_176825	Body;Body						0.661589	0.318818	-0.342771
cg19281948	37	2	109211667	LIMS1;LIMS1;LIMS1	NM_004987;NM_001193488;NM_001193483	5'UTR;5'UTR;Body				chr2:109211421-109211421		0.774216	0.406588	-0.367628
cg19752397	37	2	109227483	LIMS1;LIMS1;LIMS1;LIMS1	NM_004987;NM_001193488;NM_001193482;NM_001193483	5'UTR;5'UTR;Body;Body						0.818842	0.565148	-0.253694
cg05310309	37	2	109257429	LIMS1	NM_004987	5'UTR					TRUE	0.652423	0.389997	-0.262426
cg22757569	37	2	109278918	LIMS1;LIMS1;LIMS1;LIMS1;LIMS1;LIMS1	NM_001193482;NM_001193484;NM_001193485;NM_001193488;NM_004987;NM_001193483	Body;Body;Body;Body;Body;Body						0.6564	0.397815	-0.258586
cg14333911	37	2	109830195	SH3RF3	NM_001099289	Body				chr2:109830137-109830137		0.630183	0.208266	-0.421917
cg16635948	37	2	109834011	SH3RF3	NM_001099289	Body					TRUE	0.72681	0.35278	-0.37403
cg09891198	37	2	109855261	SH3RF3	NM_001099289	Body				chr2:109855106-109855106		0.469451	0.127014	-0.342438
cg17803713	37	2	109873891	SH3RF3	NM_001099289	Body					TRUE	0.792347	0.542092	-0.250254
cg13221285	37	2	109891681	SH3RF3	NM_001099289	Body				chr2:109891581-109891581		0.879333	0.623254	-0.256079
cg20013057	37	2	110367367	SEPT10;SEPT10;SEPT10	NR_047585;NM_178584;NM_144710	Body;Body;Body	chr2:110370906-110373301	N_Shelf				0.741703	0.460448	-0.281255
cg25973537	37	2	111562588	ACOXL	NM_001142807	Body						0.804401	0.457112	-0.347289
cg07097354	37	2	111610028	ACOXL	NM_001142807	Body				chr2:111609988-111609988		0.794584	0.456869	-0.337715
cg09636163	37	2	111829360	ACOXL;ACOXL;ACOXL	NM_001142807;NM_001142808;NM_001105516	Body;Body;Body					TRUE	0.409969	0.15842	-0.251549
cg12201616	37	2	111920341	BCL2L11;BCL2L11;BCL2L11;BCL2L11;BCL2L11;BCL2L11;BCL2L11;BCL2L11;BCL2L11;BCL2L11;BCL2L11;BCL2L11;BCL2L11;BCL2L11;BCL2L11;BCL2L11	NM_138627;NM_138626;NM_001204111;NM_006538;NM_001204106;NM_138621;NM_138625;NM_138624;NM_001204107;NM_207003;NM_138622;NM_138623;NM_001204109;NM_001204112;NM_001204108;NM_001204110	Body;Body;Body;Body;Body;Body;3'UTR;3'UTR;3'UTR;3'UTR;3'UTR;3'UTR;3'UTR;3'UTR;3'UTR;3'UTR						0.772133	0.476703	-0.295431
cg03726156	37	2	112209702	MIR4435-2HG;MIR4435-2HG	NR_015395;NR_024373	Body;Body						0.534954	0.243345	-0.291609
cg25784633	37	2	112264739									0.719758	0.437041	-0.282717
cg21975549	37	2	112391824							chr2:112391711-112391711		0.72449	0.404947	-0.319543
cg23262488	37	2	112468472								TRUE	0.733379	0.474314	-0.259064
cg00212275	37	2	112472694									0.760551	0.457943	-0.302607
cg24743301	37	2	112945506	FBLN7;FBLN7	NM_001128165;NM_153214	3'UTR;3'UTR	chr2:112944811-112945022	S_Shore			TRUE	0.889544	0.611747	-0.277796
cg11711525	37	2	113388855							chr2:113388786-113388786		0.403042	0.105934	-0.297108
cg02836864	37	2	113388910							chr2:113388786-113388786	TRUE	0.454531	0.142031	-0.312499
cg01563363	37	2	113398552							chr2:113398370-113398370		0.568761	0.315317	-0.253444
cg26703507	37	2	113404661	SLC20A1	NM_005415	Body	chr2:113403001-113404079	S_Shore			TRUE	0.668581	0.337543	-0.331038
cg06121808	37	2	113404678	SLC20A1	NM_005415	Body	chr2:113403001-113404079	S_Shore			TRUE	0.591203	0.282372	-0.308831
cg21086293	37	2	113404928	SLC20A1	NM_005415	Body	chr2:113403001-113404079	S_Shore				0.580347	0.311023	-0.269325
cg11339384	37	2	113405125	SLC20A1	NM_005415	Body	chr2:113403001-113404079	S_Shore				0.809317	0.436494	-0.372823
cg00522451	37	2	113464048								TRUE	0.695134	0.413501	-0.281633
cg14802587	37	2	113579048									0.86367	0.587381	-0.276289
cg12443509	37	2	113643379							chr2:113643095-113643095		0.715026	0.452889	-0.262138
cg02543462	37	2	113885116	IL1RN;IL1RN;IL1RN;IL1RN	NM_173842;NM_173843;NM_173841;NM_000577	TSS200;5'UTR;Body;Body					TRUE	0.804183	0.542624	-0.261559
cg11201567	37	2	113933008	PSD4	NM_012455	5'UTR						0.449807	0.190452	-0.259355
cg12709832	37	2	113933024	PSD4	NM_012455	5'UTR						0.529498	0.210615	-0.318883
cg21065856	37	2	114008907	PAX8-AS1;PAX8;PAX8;PAX8;PAX8	NR_015377;NM_003466;NM_013953;NM_013952;NM_013992	Body;Body;Body;Body;Body						0.858775	0.542386	-0.316389
cg17711395	37	2	114148353									0.570411	0.271339	-0.299072
cg12099356	37	2	114457972									0.707361	0.36014	-0.347221
cg22185537	37	2	118817853									0.609073	0.270671	-0.338402
cg24753847	37	2	118879812									0.741905	0.484253	-0.257652
cg14020285	37	2	119401665								TRUE	0.850432	0.578021	-0.272411
cg19223521	37	2	119436490								TRUE	0.868197	0.616833	-0.251365
cg02280281	37	2	119593949				chr2:119592602-119593845	S_Shore			TRUE	0.381736	0.12138	-0.260356
cg02958634	37	2	119594696				chr2:119592602-119593845	S_Shore			TRUE	0.549152	0.286762	-0.26239
cg25317460	37	2	119608121				chr2:119606038-119606313	S_Shore			TRUE	0.522717	0.267605	-0.255112
cg11236727	37	2	119609592				chr2:119611296-119611881	N_Shore			TRUE	0.722007	0.436825	-0.285181
cg13367169	37	2	119609642				chr2:119611296-119611881	N_Shore			TRUE	0.565351	0.297624	-0.267727
cg05036212	37	2	119609691				chr2:119611296-119611881	N_Shore			TRUE	0.705032	0.370052	-0.334979
cg08138685	37	2	119610526				chr2:119611296-119611881	N_Shore			TRUE	0.540792	0.223524	-0.317268
cg07758482	37	2	119698268	MARCO	NM_006770	TSS1500				chr2:119698034-119698034		0.777089	0.455032	-0.322056
cg11009736	37	2	119699682	MARCO	NM_006770	TSS200					TRUE	0.552519	0.289957	-0.262561
cg00435273	37	2	120113498	C2orf76	NM_001017927	5'UTR				chr2:120113403-120113403		0.614308	0.325931	-0.288377
cg15799799	37	2	120186222				chr2:120189022-120189765	N_Shelf				0.862667	0.595591	-0.267076
cg05927390	37	2	120213176	SCTR	NM_002980	Body						0.59705	0.307209	-0.289841
cg16928313	37	2	120578956	PTPN4	NM_002830	Body					TRUE	0.864774	0.567276	-0.297498
cg14709239	37	2	121098464				chr2:121101046-121101432	N_Shelf			TRUE	0.778652	0.476943	-0.301709
cg17073537	37	2	121363518									0.687998	0.377192	-0.310806
cg24778004	37	2	121461039								TRUE	0.82889	0.553753	-0.275137
cg21454279	37	2	121612912	GLI2	NM_005270	Body						0.871146	0.597298	-0.273847
cg04738237	37	2	121622953	GLI2	NM_005270	Body	chr2:121624827-121625209	N_Shore			TRUE	0.909792	0.656181	-0.253611
cg12386151	37	2	121628408	GLI2	NM_005270	Body	chr2:121624827-121625209	S_Shelf				0.925376	0.62485	-0.300526
cg12080831	37	2	121697428	GLI2	NM_005270	Body					TRUE	0.675828	0.376221	-0.299608
cg24064594	37	2	127414827	GYPC;GYPC	NM_016815;NM_002101	Body;Body	chr2:127413696-127414171	S_Shore			TRUE	0.388359	0.127	-0.261358
cg24772388	37	2	127414883	GYPC;GYPC	NM_016815;NM_002101	Body;Body	chr2:127413696-127414171	S_Shore			TRUE	0.499425	0.241293	-0.258132
cg05586457	37	2	127416839	GYPC;GYPC	NM_016815;NM_002101	Body;Body	chr2:127413696-127414171	S_Shelf		chr2:127416778-127416778	TRUE	0.569783	0.210789	-0.358995
cg18859612	37	2	127422064	GYPC;GYPC;GYPC	NM_001256584;NM_002101;NM_016815	5'UTR;Body;Body						0.772753	0.419837	-0.352916
cg22596282	37	2	128834864									0.508227	0.218286	-0.289941
cg23025288	37	2	129278724									0.706382	0.444275	-0.262106
cg26874367	37	2	129381792								TRUE	0.608119	0.296332	-0.311787
cg23362253	37	2	129473367									0.807873	0.548443	-0.25943
cg19009745	37	2	129485901									0.868532	0.582612	-0.28592
cg24780366	37	2	129492610				chr2:129494359-129495074	N_Shore		chr2:129492302-129492302		0.513888	0.183479	-0.330408
cg00860726	37	2	129508082									0.714714	0.412717	-0.301997
cg17588294	37	2	129548156								TRUE	0.766704	0.506426	-0.260279
cg23274984	37	2	129636330								TRUE	0.804333	0.54274	-0.261593
cg10884612	37	2	129708215									0.807088	0.552699	-0.254389
cg14308364	37	2	130569867									0.74116	0.369787	-0.371373
cg03206401	37	2	130956119	TUBA3E	NM_207312	TSS200	chr2:130955619-130956274	Island			TRUE	0.540873	0.0387959	-0.502077
cg00401745	37	2	131673963	ARHGEF4;ARHGEF4	NM_015320;NM_032995	TSS1500;TSS1500	chr2:131673686-131674150	Island			TRUE	0.53377	0.204914	-0.328855
cg19903604	37	2	131674149	ARHGEF4;ARHGEF4	NM_032995;NM_015320	TSS1500;TSS200	chr2:131673686-131674150	Island				0.583606	0.329501	-0.254105
cg00028678	37	2	131674175	ARHGEF4;ARHGEF4	NM_032995;NM_015320	TSS200;TSS200	chr2:131673686-131674150	S_Shore			TRUE	0.669923	0.405307	-0.264616
cg11469778	37	2	131674201	ARHGEF4;ARHGEF4	NM_032995;NM_015320	TSS200;TSS200	chr2:131673686-131674150	S_Shore			TRUE	0.605221	0.345106	-0.260115
cg07030884	37	2	131715695	ARHGEF4;ARHGEF4	NM_032995;NM_015320	Body;Body						0.58612	0.18564	-0.400481
cg10004780	37	2	131722307	ARHGEF4;ARHGEF4	NM_032995;NM_015320	Body;Body	chr2:131720819-131721867	S_Shore			TRUE	0.557307	0.280056	-0.277251
cg13029887	37	2	131767952	ARHGEF4;ARHGEF4	NM_032995;NM_015320	Body;Body						0.789772	0.50717	-0.282602
cg23664553	37	2	131768474	ARHGEF4;ARHGEF4	NM_032995;NM_015320	Body;Body						0.704373	0.355097	-0.349276
cg17108303	37	2	133165082									0.783432	0.527495	-0.255937
cg10537176	37	2	133395195	GPR39	NM_001508	Body					TRUE	0.909315	0.624241	-0.285075
cg14416623	37	2	133561787	NCKAP5;NCKAP5	NM_207363;NM_207481	Body;Body					TRUE	0.499736	0.114073	-0.385663
cg25317338	37	2	133669525	MIR7853;NCKAP5;NCKAP5	NR_107007;NM_207363;NM_207481	Body;Body;Body						0.543382	0.289275	-0.254108
cg26833654	37	2	133672357	MIR7853;NCKAP5;NCKAP5	NR_107007;NM_207363;NM_207481	Body;Body;Body						0.898794	0.648036	-0.250758
cg19676227	37	2	133695582	NCKAP5;NCKAP5	NM_207363;NM_207481	Body;Body					TRUE	0.557932	0.306077	-0.251855
cg20089110	37	2	133727257	MIR7853;NCKAP5;NCKAP5	NR_107007;NM_207363;NM_207481	Body;Body;Body						0.868376	0.613911	-0.254465
cg18471021	37	2	134089590	MIR7853;NCKAP5;NCKAP5	NR_107007;NM_207363;NM_207481	Body;Body;Body						0.729922	0.465406	-0.264516
cg14592981	37	2	134122884	MIR7853;NCKAP5;NCKAP5	NR_107007;NM_207363;NM_207481	Body;Body;Body						0.834874	0.477791	-0.357083
cg00827382	37	2	134180028	NCKAP5;NCKAP5	NM_207363;NM_207481	Body;Body					TRUE	0.794258	0.530841	-0.263417
cg23072408	37	2	134199731	NCKAP5;NCKAP5	NM_207363;NM_207481	Body;Body					TRUE	0.849531	0.589413	-0.260119
cg09587456	37	2	134248320	NCKAP5;NCKAP5	NM_207363;NM_207481	Body;Body						0.418611	0.157152	-0.261459
cg25153505	37	2	134322791	NCKAP5;NCKAP5	NM_207363;NM_207481	5'UTR;5'UTR						0.884252	0.617507	-0.266745
cg03438637	37	2	134575933							chr2:134575786-134575786		0.482686	0.146639	-0.336047
cg25818097	37	2	134975778									0.817556	0.422321	-0.395235
cg20880354	37	2	135339607	TMEM163	NM_030923	Body						0.809508	0.495329	-0.314179
cg17688358	37	2	135381611	TMEM163	NM_030923	Body						0.756577	0.362338	-0.394239
cg04898302	37	2	135441409	TMEM163	NM_030923	Body						0.68831	0.391259	-0.297051
cg16064512	37	2	135472142	TMEM163	NM_030923	Body	chr2:135475698-135476993	N_Shelf				0.757944	0.491848	-0.266095
cg26186509	37	2	136577654	LOC100507600;LCT	NR_045486;NM_002299	TSS200;Body						0.770295	0.39055	-0.379746
cg26932455	37	2	136577732	LOC100507600;LCT	NR_045486;NM_002299	TSS200;Body						0.719075	0.418056	-0.301019
cg04061696	37	2	136577747	LOC100507600;LCT	NR_045486;NM_002299	TSS200;Body						0.641062	0.338492	-0.30257
cg23374992	37	2	136872067	CXCR4;CXCR4;CXCR4	NM_001008540;NM_001008540;NM_003467	3'UTR;1stExon;3'UTR	chr2:136874086-136875780	N_Shelf			TRUE	0.751675	0.470388	-0.281286
cg12595667	37	2	136872094	CXCR4;CXCR4;CXCR4	NM_001008540;NM_001008540;NM_003467	3'UTR;1stExon;3'UTR	chr2:136874086-136875780	N_Shore			TRUE	0.665113	0.40782	-0.257293
cg03733145	37	2	136887407							chr2:136887149-136887149		0.663782	0.374231	-0.289552
cg23704412	37	2	136893882							chr2:136893434-136893434		0.81143	0.557641	-0.253789
cg19173056	37	2	137068818									0.687156	0.398749	-0.288406
cg18154283	37	2	137084902							chr2:137084668-137084668	TRUE	0.721389	0.373551	-0.347838
cg05772390	37	2	137140148							chr2:137139482-137139482		0.858828	0.504385	-0.354444
cg11737758	37	2	137931242	THSD7B	NM_001080427	Body						0.480324	0.20848	-0.271844
cg17180863	37	2	137950714	THSD7B	NM_001080427	Body						0.768806	0.50896	-0.259846
cg11795053	37	2	138399663	THSD7B	NM_001080427	Body						0.827401	0.520256	-0.307145
cg17992922	37	2	138717942							chr2:138717867-138717867		0.798655	0.430897	-0.367758
cg04989243	37	2	138775156									0.868454	0.5748	-0.293654
cg22393452	37	2	138786387									0.705377	0.421261	-0.284116
cg12084285	37	2	139880475									0.649802	0.374964	-0.274837
cg07336099	37	2	140029691								TRUE	0.73818	0.443498	-0.294681
cg23653461	37	2	142280183	LRP1B	NM_018557	Body						0.736875	0.482233	-0.254643
cg09412538	37	2	142315127	LRP1B	NM_018557	Body				chr2:142314861-142314861		0.717386	0.405422	-0.311964
cg05693938	37	2	142943870									0.698647	0.372761	-0.325886
cg12929784	37	2	143453255									0.53529	0.251237	-0.284053
cg17279142	37	2	143591891							chr2:143591579-143591579		0.621724	0.357652	-0.264071
cg08362875	37	2	143787956	KYNU;KYNU	NM_001199241;NM_003937	Body;Body						0.730041	0.43194	-0.298101
cg11296933	37	2	143886567	ARHGAP15	NM_018460	TSS1500						0.885812	0.563218	-0.322595
cg14155190	37	2	143886585	ARHGAP15	NM_018460	TSS1500						0.806511	0.531637	-0.274873
cg18855030	37	2	143886940	ARHGAP15;ARHGAP15	NM_018460;NM_018460	1stExon;5'UTR			low-CpG:143603402-143603483		TRUE	0.803054	0.506411	-0.296642
cg02396110	37	2	143907996	ARHGAP15	NM_018460	5'UTR						0.760121	0.496214	-0.263907
cg03155016	37	2	144021461	ARHGAP15	NM_018460	Body						0.860892	0.598693	-0.262199
cg19414189	37	2	144895805	GTDC1;GTDC1;GTDC1;GTDC1;GTDC1;GTDC1;GTDC1	NM_001284234;NM_001284238;NM_024659;NM_001164629;NM_001006636;NM_001284233;NM_001284235	Body;Body;Body;Body;Body;Body;Body						0.899805	0.647001	-0.252804
cg21669515	37	2	144941552	GTDC1;GTDC1;GTDC1;GTDC1;GTDC1;GTDC1;GTDC1	NM_024659;NM_001164629;NM_001006636;NM_001284233;NM_001284235;NM_001284234;NM_001284238	Body;Body;Body;Body;Body;5'UTR;5'UTR				chr2:144941420-144941420		0.734114	0.434628	-0.299487
cg18826637	37	2	145116633							chr2:145116388-145116388	TRUE	0.66082	0.284657	-0.376163
cg20995564	37	2	145172035	ZEB2;ZEB2	NM_014795;NM_001171653	Body;Body					TRUE	0.880572	0.538001	-0.342571
cg12093270	37	2	145173022	ZEB2;ZEB2	NM_001171653;NM_014795	Body;Body						0.822233	0.546281	-0.275951
cg22549540	37	2	145388197									0.863017	0.527092	-0.335925
cg13394991	37	2	146502809							chr2:146502726-146502726		0.447968	0.11283	-0.335138
cg15972337	37	2	146509297							chr2:146509165-146509165		0.451148	0.18817	-0.262978
cg00198173	37	2	146569089									0.485632	0.23005	-0.255582
cg17338146	37	2	147142856								TRUE	0.826015	0.538054	-0.287961
cg03678313	37	2	147594885									0.879388	0.61672	-0.262668
cg02910483	37	2	148055636									0.859901	0.572138	-0.287763
cg14009122	37	2	148085432									0.739675	0.325296	-0.414379
cg20981305	37	2	148253602									0.82947	0.52909	-0.30038
cg14332680	37	2	148381259							chr2:148381006-148381006		0.915968	0.603868	-0.3121
cg07790232	37	2	148386625									0.645615	0.290776	-0.354839
cg02960654	37	2	148421642									0.809825	0.545766	-0.264059
cg13734780	37	2	149297918									0.684765	0.420555	-0.264211
cg08789894	37	2	150344319									0.77089	0.492692	-0.278198
cg00425411	37	2	150715997									0.487363	0.137903	-0.34946
cg16149321	37	2	150845024									0.725147	0.389189	-0.335958
cg11977691	37	2	151480611									0.579354	0.302727	-0.276627
cg05543492	37	2	151484439								TRUE	0.891307	0.629252	-0.262055
cg05413285	37	2	151537993							chr2:151537937-151537937	TRUE	0.860703	0.57821	-0.282493
cg06141302	37	2	151632449									0.785721	0.508766	-0.276955
cg24011981	37	2	151927956									0.70001	0.434369	-0.265641
cg09917274	37	2	152144828	NMI	NM_004688	5'UTR	chr2:152145869-152146319	N_Shore		chr2:152144821-152144821		0.924951	0.660662	-0.264289
cg06833298	37	2	152246914									0.793224	0.498037	-0.295186
cg06645657	37	2	152735816	CACNB4;CACNB4;CACNB4;CACNB4	NM_001005747;NM_001005746;NM_001145798;NM_000726	Body;Body;Body;Body						0.642199	0.220011	-0.422188
cg07460778	37	2	152927790	CACNB4;CACNB4;CACNB4	NM_001005746;NM_001145798;NM_000726	Body;Body;Body						0.729153	0.468337	-0.260816
cg06485332	37	2	152945945	CACNB4;CACNB4;CACNB4	NM_001005746;NM_001145798;NM_000726	Body;Body;Body						0.612785	0.327274	-0.285511
cg16898959	37	2	153275407	FMNL2	NM_052905	Body				chr2:153275296-153275296		0.675688	0.307782	-0.367906
cg18166936	37	2	153430048	FMNL2	NM_052905	Body				chr2:153429708-153429708		0.62074	0.354911	-0.265829
cg00612751	37	2	153468347	FMNL2	NM_052905	Body					TRUE	0.669502	0.405284	-0.264218
cg24797982	37	2	153481457	FMNL2	NM_052905	Body						0.659144	0.369469	-0.289675
cg03845654	37	2	153492884	FMNL2	NM_052905	Body						0.908517	0.642726	-0.265791
cg10908528	37	2	155293862	LOC100144595;GALNT13;GALNT13	NM_001256368;NM_052917;NM_001301627	3'UTR;Body;Body						0.634851	0.343536	-0.291315
cg06535446	37	2	155543030									0.669198	0.397446	-0.271752
cg02039987	37	2	157291262	GPD2	NM_001083112	TSS1500	chr2:157292102-157292646	N_Shore			TRUE	0.601088	0.350305	-0.250783
cg04271873	37	2	158007398									0.76716	0.506666	-0.260493
cg13587823	37	2	158039725							chr2:158039321-158039321		0.491977	0.22464	-0.267337
cg12109958	37	2	158049846									0.723264	0.371066	-0.352198
cg18679416	37	2	158261028									0.742222	0.329417	-0.412805
cg10895511	37	2	158277352	CYTIP	NM_004288	Body				chr2:158277241-158277241		0.694243	0.394949	-0.299294
cg12177677	37	2	158300475	CYTIP	NM_004288	1stExon					TRUE	0.888413	0.538496	-0.349918
cg10559416	37	2	158300485	CYTIP	NM_004288	1stExon					TRUE	0.87133	0.514394	-0.356936
cg14678223	37	2	158300811	CYTIP	NM_004288	TSS1500						0.895843	0.554366	-0.341477
cg24848491	37	2	158300960	CYTIP	NM_004288	TSS1500						0.723816	0.424717	-0.299099
cg00659068	37	2	158325964							chr2:158325907-158325907		0.69654	0.315881	-0.380659
cg22992505	37	2	158712427	ACVR1;ACVR1	NM_001105;NM_001111067	5'UTR;5'UTR				chr2:158712267-158712267		0.885224	0.535571	-0.349653
cg02321197	37	2	158755934									0.689014	0.350468	-0.338547
cg06975684	37	2	159248551	CCDC148;CCDC148;CCDC148	NM_138803;NM_001301685;NM_001301684	Body;Body;5'UTR						0.587946	0.273785	-0.314161
cg23327824	37	2	160082960	TANC1;TANC1	NM_001145909;NM_033394	Body;Body						0.648422	0.36132	-0.287103
cg15152331	37	2	160958810	ITGB6	NM_000888	Body					TRUE	0.868068	0.551839	-0.316229
cg00478516	37	2	161013382	ITGB6;ITGB6;ITGB6;ITGB6;ITGB6;ITGB6;ITGB6	NM_001282390;NM_001282389;NM_000888;NM_001282388;NM_001282355;NM_001282354;NM_001282353	Body;Body;Body;Body;Body;Body;Body				chr2:161013283-161013283		0.852315	0.512052	-0.340263
cg17327171	37	2	161156221	RBMS1;RBMS1	NM_002897;NM_016836	Body;Body					TRUE	0.790279	0.420895	-0.369383
cg25120849	37	2	161189122	RBMS1;RBMS1	NM_002897;NM_016836	Body;Body						0.648581	0.285697	-0.362884
cg21703764	37	2	161470149									0.903923	0.543578	-0.360344
cg12596218	37	2	161934236							chr2:161933813-161933813		0.512686	0.254539	-0.258148
cg10011158	37	2	161945394									0.866559	0.606027	-0.260532
cg00021659	37	2	161996385	TANK;TANK	NM_004180;NM_133484	5'UTR;5'UTR						0.598048	0.285411	-0.312637
cg24094122	37	2	162915893	DPP4	NM_001935	Body						0.895359	0.619803	-0.275556
cg17820085	37	2	163100992	FAP;FAP	NM_004460;NM_001291807	TSS1500;TSS1500						0.524948	0.266854	-0.258094
cg23330930	37	2	165170719									0.506423	0.242475	-0.263948
cg01267892	37	2	165579290	COBLL1;COBLL1;COBLL1;COBLL1	NM_014900;NM_001278461;NM_001278458;NM_001278460	Body;Body;Body;Body						0.751937	0.366899	-0.385038
cg18025786	37	2	165791096	SLC38A11;SLC38A11	NM_001199148;NM_173512	Body;Body						0.579922	0.323011	-0.256911
cg17947058	37	2	165845417									0.611368	0.309062	-0.302306
cg21892407	37	2	166006239	SCN3A;SCN3A;SCN3A	NM_001081677;NM_001081676;NM_006922	Body;Body;Body						0.75473	0.413424	-0.341305
cg09800774	37	2	167005840	SCN1A;LOC101929680	NM_001202435;NR_110260	TSS200;Body						0.466227	0.214876	-0.251351
cg02419922	37	2	167006051	SCN1A;LOC101929680	NM_001202435;NR_110260	TSS1500;Body						0.44215	0.160956	-0.281194
cg05331214	37	2	167343774	SCN7A	NM_002976	TSS1500					TRUE	0.762049	0.480577	-0.281472
cg00282195	37	2	168674769	B3GALT1	NM_020981	TSS1500					TRUE	0.771798	0.515998	-0.2558
cg17280849	37	2	168783262	LOC105616981	NR_131227	Body						0.903652	0.618239	-0.285413
cg23819100	37	2	169202320									0.654701	0.362779	-0.291922
cg12607945	37	2	169347230	CERS6;CERS6	NM_001256126;NM_203463	Body;Body				chr2:169347125-169347125		0.653188	0.224539	-0.428649
cg05427189	37	2	169964245									0.575958	0.240338	-0.33562
cg13800897	37	2	170364158									0.880234	0.583518	-0.296716
cg22393690	37	2	171112567	MYO3B;MYO3B;MYO3B;MYO3B;MYO3B	NR_045684;NR_045683;NR_045682;NM_138995;NM_001083615	Body;Body;Body;Body;Body				chr2:171112437-171112437		0.67444	0.418486	-0.255954
cg05526801	37	2	171292024	MYO3B;MYO3B;MYO3B;MYO3B;MYO3B	NR_045684;NR_045683;NR_045682;NM_138995;NM_001083615	Body;Body;Body;Body;Body						0.570849	0.311573	-0.259277
cg24078074	37	2	171343309	MYO3B;MYO3B;MYO3B;MYO3B;MYO3B	NR_045684;NR_045683;NR_045682;NM_138995;NM_001083615	Body;Body;Body;Body;Body						0.90845	0.636529	-0.271921
cg03085275	37	2	172182919	METTL8	NM_024770	Body						0.851384	0.500939	-0.350445
[truncated: 9,657 more rows]

## Sheet: Hyper 0.25 plaque
IlmnID	Genome_Build	CHR	MAPINFO	UCSC_RefGene_Name	UCSC_RefGene_Accession	UCSC_RefGene_Group	UCSC_CpG_Islands_Name	Relation_to_UCSC_CpG_Island	Phantom4_Enhancers	Phantom5_Enhancers	Methyl450_Loci	Control Mean	Plaque Mean	Plaque-Control
[truncated: 19,242 more rows]

[truncated: 1 more sheets: Hypo 0.25 plaque]
