# Supplementary material for: Global CpG DNA Methylation Footprint in Kaposi’s Sarcoma
Source: Front Cell Infect Microbiol. 2021 Jul 9;11:666143. doi: 10.3389/fcimb.2021.666143 (PMC8300563; doi:10.3389/fcimb.2021.666143)
Supplement: Supplementary Table 2 — Hyper methylated promoters and enhancers. [file Table_2.xlsx]

## Sheet: all hyper nodule
chr1	846095	846295	Enhancer	NOC2L;RP11;PLEKHN1;C1orf170;RP11;RP11;HES4;AGRN;KLHL17;C1orf159;SDF4;B3GALT6;UBE2J2;RP5;SCNN1D;PUSL1;ACAP3;RP5;CPSF3L;GLTPD1;TAS1R3;DVL1;AURKAIP1;MRPL20	Keratinocyte;Keratinocyte;Keratinocyte;Keratinocyte;Keratinocyte;Keratinocyte;Keratinocyte;Keratinocyte;Keratinocyte;Keratinocyte;Keratinocyte;Keratinocyte;Keratinocyte;Keratinocyte;Keratinocyte;Keratinocyte;Keratinocyte;Keratinocyte;Keratinocyte;Keratinocyte;Keratinocyte;Keratinocyte;Keratinocyte;Keratinocyte
chr1	907018	907218	Enhancer	NOC2L;PLEKHN1;C1orf170;RP11;RP11;HES4;ISG15;AGRN;KLHL17;RNF223;C1orf159;SDF4;B3GALT6;UBE2J2;RP5;SCNN1D;PUSL1;ACAP3;RP5;CPSF3L;GLTPD1;DVL1;MXRA8;AURKAIP1;CCNL2;MRPL20;SSU72	Keratinocyte;Keratinocyte;Keratinocyte;Keratinocyte;Keratinocyte;Keratinocyte;Keratinocyte;Keratinocyte;Keratinocyte;Keratinocyte;Keratinocyte;Keratinocyte;Keratinocyte;Keratinocyte;Keratinocyte;Keratinocyte;Keratinocyte;Keratinocyte;Keratinocyte;Keratinocyte;Keratinocyte;Keratinocyte;Keratinocyte;Keratinocyte;Keratinocyte;Keratinocyte;Keratinocyte
chr1	1050010	1050210	Enhancer	NOC2L;SAMD11;RP11;PLEKHN1;C1orf170;RP11;HES4;ISG15;AGRN;RP11;KLHL17;FAM41C;C1orf159;SDF4;B3GALT6;RP5;UBE2J2;RP5;PUSL1;ACAP3;RP5;CPSF3L;GLTPD1;DVL1;AURKAIP1;CCNL2;MRPL20;SSU72	Keratinocyte;Keratinocyte;Keratinocyte;Keratinocyte;Keratinocyte;Keratinocyte;Keratinocyte;Keratinocyte;Keratinocyte;Keratinocyte;Keratinocyte;Keratinocyte;Keratinocyte;Keratinocyte;Keratinocyte;Keratinocyte;Keratinocyte;Keratinocyte;Keratinocyte;Keratinocyte;Keratinocyte;Keratinocyte;Keratinocyte;Keratinocyte;Keratinocyte;Keratinocyte;Keratinocyte;Keratinocyte
chr1	1194503	1194703	Enhancer	NOC2L;RP11;C1orf170;RP11;HES4;ISG15;AGRN;RP11;KLHL17;C1orf159;TNFRSF18;SDF4;B3GALT6;FAM132A;RP5;UBE2J2;RP5;SCNN1D;PUSL1;ACAP3;RP5;CPSF3L;GLTPD1;TAS1R3;DVL1;MXRA8;AURKAIP1;CCNL2;RP4;MRPL20;ANKRD65;RP4;VWA1;ATAD3B;SSU72;MIB2;SLC35E2B;NADK	Keratinocyte;Keratinocyte;Keratinocyte;Keratinocyte;Keratinocyte;Keratinocyte;Keratinocyte;Keratinocyte;Keratinocyte;Keratinocyte;Keratinocyte;Keratinocyte;Keratinocyte;Keratinocyte;Keratinocyte;Keratinocyte;Keratinocyte;Keratinocyte;Keratinocyte;Keratinocyte;Keratinocyte;Keratinocyte;Keratinocyte;Keratinocyte;Keratinocyte;Keratinocyte;Keratinocyte;Keratinocyte;Keratinocyte;Keratinocyte;Keratinoc…
chr1	1217355	1217555	Enhancer	NOC2L;SAMD11;RP11;PLEKHN1;C1orf170;RP11;HES4;ISG15;AGRN;KLHL17;FAM41C;TTLL10;TTLL10;TNFRSF18;SDF4;B3GALT6;FAM132A;RP5;UBE2J2;RP5;SCNN1D;PUSL1;ACAP3;RP5;CPSF3L;GLTPD1;TAS1R3;DVL1;MXRA8;AURKAIP1;CCNL2;RP4;MRPL20;ANKRD65;RP4;VWA1;ATAD3C;SSU72;MIB2	Keratinocyte;Keratinocyte;Keratinocyte;Keratinocyte;Keratinocyte;Keratinocyte;Keratinocyte;Keratinocyte;Keratinocyte;Keratinocyte;Keratinocyte;Keratinocyte;Keratinocyte;Keratinocyte;Keratinocyte;Keratinocyte;Keratinocyte;Keratinocyte;Keratinocyte;Keratinocyte;Keratinocyte;Keratinocyte;Keratinocyte;Keratinocyte;Keratinocyte;Keratinocyte;Keratinocyte;Keratinocyte;Keratinocyte;Keratinocyte;Keratinoc…
chr1	1238336	1238536	Enhancer	NOC2L;RP11;PLEKHN1;RP11;HES4;ISG15;AGRN;KLHL17;FAM41C;TNFRSF18;SDF4;B3GALT6;FAM132A;RP5;UBE2J2;RP5;SCNN1D;PUSL1;ACAP3;RP5;CPSF3L;GLTPD1;TAS1R3;DVL1;AURKAIP1;CCNL2;RP4;MRPL20;RP4;VWA1;ATAD3C;ATAD3B	Keratinocyte;Keratinocyte;Keratinocyte;Keratinocyte;Keratinocyte;Keratinocyte;Keratinocyte;Keratinocyte;Keratinocyte;Keratinocyte;Keratinocyte;Keratinocyte;Keratinocyte;Keratinocyte;Keratinocyte;Keratinocyte;Keratinocyte;Keratinocyte;Keratinocyte;Keratinocyte;Keratinocyte;Keratinocyte;Keratinocyte;Keratinocyte;Keratinocyte;Keratinocyte;Keratinocyte;Keratinocyte;Keratinocyte;Keratinocyte;Keratinoc…
chr1	1238495	1238695	Enhancer	NOC2L;RP11;PLEKHN1;RP11;HES4;ISG15;AGRN;KLHL17;FAM41C;TNFRSF18;SDF4;B3GALT6;FAM132A;RP5;UBE2J2;RP5;SCNN1D;PUSL1;ACAP3;RP5;CPSF3L;GLTPD1;TAS1R3;DVL1;AURKAIP1;CCNL2;RP4;MRPL20;RP4;VWA1;ATAD3C;ATAD3B;SAMD11;TTLL10;MXRA8	Keratinocyte;Keratinocyte;Keratinocyte;Keratinocyte;Keratinocyte;Keratinocyte;Keratinocyte;Keratinocyte;Keratinocyte;Keratinocyte;Keratinocyte;Keratinocyte;Keratinocyte;Keratinocyte;Keratinocyte;Keratinocyte;Keratinocyte;Keratinocyte;Keratinocyte;Keratinocyte;Keratinocyte;Keratinocyte;Keratinocyte;Keratinocyte;Keratinocyte;Keratinocyte;Keratinocyte;Keratinocyte;Keratinocyte;Keratinocyte;Keratinoc…
chr1	1238578	1238778	Enhancer	NOC2L;SAMD11;RP11;PLEKHN1;RP11;ISG15;AGRN;KLHL17;FAM41C;TTLL10;TTLL10;TNFRSF18;SDF4;B3GALT6;FAM132A;RP5;UBE2J2;RP5;SCNN1D;PUSL1;ACAP3;RP5;CPSF3L;GLTPD1;TAS1R3;DVL1;MXRA8;AURKAIP1;CCNL2;RP4;MRPL20;VWA1;ATAD3C;ATAD3B	Keratinocyte;Keratinocyte;Keratinocyte;Keratinocyte;Keratinocyte;Keratinocyte;Keratinocyte;Keratinocyte;Keratinocyte;Keratinocyte;Keratinocyte;Keratinocyte;Keratinocyte;Keratinocyte;Keratinocyte;Keratinocyte;Keratinocyte;Keratinocyte;Keratinocyte;Keratinocyte;Keratinocyte;Keratinocyte;Keratinocyte;Keratinocyte;Keratinocyte;Keratinocyte;Keratinocyte;Keratinocyte;Keratinocyte;Keratinocyte;Keratinoc…
chr1	1238602	1238802	Enhancer	NOC2L;SAMD11;RP11;PLEKHN1;RP11;ISG15;AGRN;KLHL17;FAM41C;TTLL10;TTLL10;TNFRSF18;SDF4;B3GALT6;FAM132A;RP5;UBE2J2;RP5;SCNN1D;PUSL1;ACAP3;RP5;CPSF3L;GLTPD1;TAS1R3;DVL1;MXRA8;AURKAIP1;CCNL2;RP4;MRPL20;VWA1;ATAD3C;ATAD3B	Keratinocyte;Keratinocyte;Keratinocyte;Keratinocyte;Keratinocyte;Keratinocyte;Keratinocyte;Keratinocyte;Keratinocyte;Keratinocyte;Keratinocyte;Keratinocyte;Keratinocyte;Keratinocyte;Keratinocyte;Keratinocyte;Keratinocyte;Keratinocyte;Keratinocyte;Keratinocyte;Keratinocyte;Keratinocyte;Keratinocyte;Keratinocyte;Keratinocyte;Keratinocyte;Keratinocyte;Keratinocyte;Keratinocyte;Keratinocyte;Keratinoc…
chr1	1238697	1238897	Enhancer	NOC2L;SAMD11;RP11;PLEKHN1;RP11;ISG15;AGRN;KLHL17;FAM41C;TTLL10;TTLL10;TNFRSF18;SDF4;B3GALT6;FAM132A;RP5;UBE2J2;RP5;SCNN1D;PUSL1;ACAP3;RP5;CPSF3L;GLTPD1;TAS1R3;DVL1;MXRA8;AURKAIP1;CCNL2;RP4;MRPL20;VWA1;ATAD3C;ATAD3B	Keratinocyte;Keratinocyte;Keratinocyte;Keratinocyte;Keratinocyte;Keratinocyte;Keratinocyte;Keratinocyte;Keratinocyte;Keratinocyte;Keratinocyte;Keratinocyte;Keratinocyte;Keratinocyte;Keratinocyte;Keratinocyte;Keratinocyte;Keratinocyte;Keratinocyte;Keratinocyte;Keratinocyte;Keratinocyte;Keratinocyte;Keratinocyte;Keratinocyte;Keratinocyte;Keratinocyte;Keratinocyte;Keratinocyte;Keratinocyte;Keratinoc…
chr1	1268044	1268244	Enhancer	NOC2L;SAMD11;PLEKHN1;C1orf170;RP11;HES4;ISG15;AGRN;KLHL17;TTLL10;TTLL10;TNFRSF18;SDF4;B3GALT6;FAM132A;RP5;UBE2J2;RP5;SCNN1D;PUSL1;ACAP3;RP5;CPSF3L;GLTPD1;TAS1R3;DVL1;MXRA8;AURKAIP1;CCNL2;RP4;MRPL20;RP4;ANKRD65;VWA1;ATAD3C;TMEM240;AL645728.2;CDK11B;RP1;SLC35E2	Keratinocyte;Keratinocyte;Keratinocyte;Keratinocyte;Keratinocyte;Keratinocyte;Keratinocyte;Keratinocyte;Keratinocyte;Keratinocyte;Keratinocyte;Keratinocyte;Keratinocyte;Keratinocyte;Keratinocyte;Keratinocyte;Keratinocyte;Keratinocyte;Keratinocyte;Keratinocyte;Keratinocyte;Keratinocyte;Keratinocyte;Keratinocyte;Keratinocyte;Keratinocyte;Keratinocyte;Keratinocyte;Keratinocyte;Keratinocyte;Keratinoc…
chr1	1355899	1356099	Enhancer	NOC2L;RP11;HES4;ISG15;AGRN;TNFRSF18;SDF4;B3GALT6;FAM132A;RP5;UBE2J2;SCNN1D;PUSL1;RP5;CPSF3L;GLTPD1;DVL1;MXRA8;AURKAIP1;CCNL2;RP4;MRPL20;RP4;ANKRD65;RP4;VWA1;ATAD3C;ATAD3B;ATAD3A;AL645728.2;SSU72;MIB2;CDK11B;SLC35E2B;CDK11A;RP1;NADK	Keratinocyte;Keratinocyte;Keratinocyte;Keratinocyte;Keratinocyte;Keratinocyte;Keratinocyte;Keratinocyte;Keratinocyte;Keratinocyte;Keratinocyte;Keratinocyte;Keratinocyte;Keratinocyte;Keratinocyte;Keratinocyte;Keratinocyte;Keratinocyte;Keratinocyte;Keratinocyte;Keratinocyte;Keratinocyte;Keratinocyte;Keratinocyte;Keratinocyte;Keratinocyte;Keratinocyte;Keratinocyte;Keratinocyte;Keratinocyte;Keratinoc…
chr1	1397424	1397624	Enhancer	NOC2L;RP11;ISG15;AGRN;SDF4;B3GALT6;AURKAIP1;CCNL2;MRPL20	Keratinocyte;Keratinocyte;Keratinocyte;Keratinocyte;Keratinocyte;Keratinocyte;Keratinocyte;Keratinocyte;Keratinocyte
chr1	1552124	1552324	Enhancer	RP11;ISG15;AGRN;SDF4;B3GALT6;UBE2J2;MRPL20;ATAD3A;AL645728.2;SSU72;AL645728.1;C1orf233;MIB2;MMP23B;CDK11B;SLC35E2B;MMP23A;CDK11A;RP1;RP1;RP1;SLC35E2;NADK;GNB1	Keratinocyte;Keratinocyte;Keratinocyte;Keratinocyte;Keratinocyte;Keratinocyte;Keratinocyte;Keratinocyte;Keratinocyte;Keratinocyte;Keratinocyte;Keratinocyte;Keratinocyte;Keratinocyte;Keratinocyte;Keratinocyte;Keratinocyte;Keratinocyte;Keratinocyte;Keratinocyte;Keratinocyte;Keratinocyte;Keratinocyte;Keratinocyte
chr1	1900973	1901173	Enhancer	RER1	Keratinocyte
chr1	1983674	1983874	Enhancer	SLC35E2B;PRKCZ;C1orf86;SKI;RER1;PLCH2	Keratinocyte;Keratinocyte;Keratinocyte;Keratinocyte;Keratinocyte;Keratinocyte
chr1	2120878	2121078	Enhancer	RP11;RP11;C1orf86;AL590822.1;SKI;RP4;PEX10;PLCH2	Keratinocyte;Keratinocyte;Keratinocyte;Keratinocyte;Keratinocyte;Keratinocyte;Keratinocyte;Keratinocyte
chr1	2120939	2121139	Enhancer	RP11;RP11;C1orf86;AL590822.1;SKI;RP4;PEX10;PLCH2	Keratinocyte;Keratinocyte;Keratinocyte;Keratinocyte;Keratinocyte;Keratinocyte;Keratinocyte;Keratinocyte
chr1	2121249	2121449	Enhancer	CDK11A;NADK;GNB1;RP11;RP11;C1orf86;AL590822.1;RP11;SKI;RP4;MORN1;RER1;PEX10;PLCH2	HUVEC;HUVEC,Keratinocyte;HUVEC,Keratinocyte;HUVEC,Keratinocyte;HUVEC,Keratinocyte;HUVEC,Keratinocyte;HUVEC,Keratinocyte;HUVEC,Keratinocyte;HUVEC,Keratinocyte;HUVEC,Keratinocyte;HUVEC;HUVEC;Keratinocyte;Keratinocyte
chr1	2121421	2121621	Enhancer	CDK11A;NADK;GNB1;RP11;RP11;C1orf86;AL590822.1;RP11;SKI;RP4;MORN1;RER1;PEX10;PLCH2	HUVEC;HUVEC,Keratinocyte;HUVEC,Keratinocyte;HUVEC,Keratinocyte;HUVEC,Keratinocyte;HUVEC,Keratinocyte;HUVEC,Keratinocyte;HUVEC,Keratinocyte;HUVEC,Keratinocyte;HUVEC,Keratinocyte;HUVEC;HUVEC;Keratinocyte;Keratinocyte
chr1	2171153	2171353	Enhancer	GNB1;C1orf222;PRKCZ;RP11;RP11;C1orf86;AL590822.1;SKI;RP4;PEX10;PLCH2;RP3;PANK4;TNFRSF14;FAM213B;MMEL1	Keratinocyte;Keratinocyte;Keratinocyte;Keratinocyte;Keratinocyte;Keratinocyte;Keratinocyte;Keratinocyte;Keratinocyte;Keratinocyte;Keratinocyte;Keratinocyte;Keratinocyte;Keratinocyte;Keratinocyte;Keratinocyte
chr1	2171779	2171979	Enhancer	GNB1;C1orf222;PRKCZ;RP11;RP11;C1orf86;AL590822.1;SKI;RP4;PEX10;PLCH2;RP3;PANK4;TNFRSF14;FAM213B;MMEL1	Keratinocyte;Keratinocyte;Keratinocyte;Keratinocyte;Keratinocyte;Keratinocyte;Keratinocyte;Keratinocyte;Keratinocyte;Keratinocyte;Keratinocyte;Keratinocyte;Keratinocyte;Keratinocyte;Keratinocyte;Keratinocyte
chr1	2188249	2188449	Enhancer	GNB1;PRKCZ;RP11;RP11;C1orf86;AL590822.1;SKI;RP4;RER1;PEX10;PLCH2;RP3;RP3;PANK4;TNFRSF14;FAM213B;MMEL1	Keratinocyte;Keratinocyte;Keratinocyte;Keratinocyte;Keratinocyte;Keratinocyte;Keratinocyte;Keratinocyte;Keratinocyte;Keratinocyte;Keratinocyte;Keratinocyte;Keratinocyte;Keratinocyte;Keratinocyte;Keratinocyte;Keratinocyte
chr1	2266038	2266238	Enhancer	RP11;C1orf86;AL590822.1;SKI;RP4;PEX10;PLCH2;RP3;RP3;PANK4;FAM213B;MMEL1	Keratinocyte;Keratinocyte;Keratinocyte;Keratinocyte;Keratinocyte;Keratinocyte;Keratinocyte;Keratinocyte;Keratinocyte;Keratinocyte;Keratinocyte;Keratinocyte
chr1	2266128	2266328	Enhancer	RP11;C1orf86;AL590822.1;SKI;RP4;PEX10;PLCH2;RP3;RP3;PANK4;FAM213B;MMEL1	Keratinocyte;Keratinocyte;Keratinocyte;Keratinocyte;Keratinocyte;Keratinocyte;Keratinocyte;Keratinocyte;Keratinocyte;Keratinocyte;Keratinocyte;Keratinocyte
chr1	3381072	3381272	Enhancer	ARHGEF16;LRRC47	Keratinocyte;Keratinocyte
chr1	3381221	3381421	Enhancer	ARHGEF16;LRRC47	Keratinocyte;Keratinocyte
chr1	3389644	3389844	Enhancer	ARHGEF16;LRRC47	Keratinocyte;Keratinocyte
chr1	3615290	3615490	Enhancer	MEGF6;TPRG1L;WRAP73;RP5;TP73;RP1;LRRC47;CEP104;DFFB;C1orf174	Keratinocyte;Keratinocyte;Keratinocyte;Keratinocyte;Keratinocyte;Keratinocyte;Keratinocyte;Keratinocyte;Keratinocyte;Keratinocyte
chr1	3615461	3615661	Enhancer	MEGF6;TPRG1L;WRAP73;RP5;TP73;RP1;LRRC47;CEP104;DFFB;C1orf174	Keratinocyte;Keratinocyte;Keratinocyte;Keratinocyte;Keratinocyte;Keratinocyte;Keratinocyte;Keratinocyte;Keratinocyte;Keratinocyte
chr1	3615615	3615815	Enhancer	MEGF6;TPRG1L;WRAP73;RP5;TP73;RP1;LRRC47;CEP104;DFFB;C1orf174	Keratinocyte;Keratinocyte;Keratinocyte;Keratinocyte;Keratinocyte;Keratinocyte;Keratinocyte;Keratinocyte;Keratinocyte;Keratinocyte
chr1	3615662	3615862	Enhancer	MEGF6;TPRG1L;WRAP73;RP5;TP73;RP1;LRRC47;CEP104;DFFB;C1orf174	Keratinocyte;Keratinocyte;Keratinocyte;Keratinocyte;Keratinocyte;Keratinocyte;Keratinocyte;Keratinocyte;Keratinocyte;Keratinocyte
chr1	3621985	3622185	Enhancer	MEGF6;TPRG1L;WRAP73;RP5;TP73;RP1;LRRC47;CEP104;DFFB;C1orf174	Keratinocyte;Keratinocyte;Keratinocyte;Keratinocyte;Keratinocyte;Keratinocyte;Keratinocyte;Keratinocyte;Keratinocyte;Keratinocyte
chr1	3623219	3623419	Enhancer	MEGF6;TPRG1L;WRAP73;RP5;TP73;RP1;LRRC47;CEP104;DFFB;C1orf174	Keratinocyte;Keratinocyte;Keratinocyte;Keratinocyte;Keratinocyte;Keratinocyte;Keratinocyte;Keratinocyte;Keratinocyte;Keratinocyte
chr1	3623289	3623489	Enhancer	MEGF6;TPRG1L;WRAP73;RP5;TP73;RP1;LRRC47;CEP104;DFFB;C1orf174	Keratinocyte;Keratinocyte;Keratinocyte;Keratinocyte;Keratinocyte;Keratinocyte;Keratinocyte;Keratinocyte;Keratinocyte;Keratinocyte
chr1	3623400	3623600	Enhancer	MEGF6;TPRG1L;WRAP73;RP5;TP73;RP1;LRRC47;CEP104;DFFB;C1orf174	Keratinocyte;Keratinocyte;Keratinocyte;Keratinocyte;Keratinocyte;Keratinocyte;Keratinocyte;Keratinocyte;Keratinocyte;Keratinocyte
chr1	3626894	3627094	Enhancer	ARHGEF16;MEGF6;TPRG1L;WRAP73;RP5;TP73;RP1;LRRC47;CEP104	Keratinocyte;Keratinocyte;Keratinocyte;Keratinocyte;Keratinocyte;Keratinocyte;Keratinocyte;Keratinocyte;Keratinocyte
chr1	5999453	5999653	Enhancer	RNF207;RPL22;ICMT;GPR153;ACOT7;HES2	Keratinocyte;Keratinocyte;Keratinocyte;Keratinocyte;Keratinocyte;Keratinocyte
chr1	6206223	6206423	Enhancer	KCNAB2;CHD5;RNF207;RP1;RPL22;ICMT;LINC00337;GPR153	HUVEC;HUVEC;HUVEC;HUVEC;HUVEC;HUVEC;HUVEC;HUVEC
chr1	6217984	6218184	Enhancer	RNF207;RPL22;ICMT;LINC00337;GPR153;ACOT7;HES2;ESPN;RP1;TNFRSF25;PLEKHG5;RP11;NOL9;ZBTB48;KLHL21;CAMTA1	Keratinocyte;Keratinocyte;Keratinocyte;Keratinocyte;Keratinocyte;Keratinocyte;Keratinocyte;Keratinocyte;Keratinocyte;Keratinocyte;Keratinocyte;Keratinocyte;Keratinocyte;Keratinocyte;Keratinocyte;Keratinocyte
chr1	6394198	6394398	Enhancer	ICMT;ACOT7	HUVEC;HUVEC
chr1	6410641	6410841	Enhancer	RNF207;RPL22;ICMT;LINC00337;GPR153;ACOT7;HES2;ESPN;RP1;TNFRSF25;PLEKHG5;RP11;NOL9;ZBTB48;PHF13;KLHL21;THAP3;DNAJC11;CAMTA1	Keratinocyte;Keratinocyte;Keratinocyte;Keratinocyte;Keratinocyte;Keratinocyte;Keratinocyte;Keratinocyte;Keratinocyte;Keratinocyte;Keratinocyte;Keratinocyte;Keratinocyte;Keratinocyte;Keratinocyte;Keratinocyte;Keratinocyte;Keratinocyte;Keratinocyte
chr1	6412358	6412558	Enhancer	CHD5;RNF207;RPL22;ICMT;LINC00337;GPR153;ACOT7;HES2;ESPN;RP1;TNFRSF25;PLEKHG5;RP11;NOL9;ZBTB48;PHF13;KLHL21;THAP3;DNAJC11;CAMTA1	Keratinocyte;Keratinocyte;Keratinocyte;Keratinocyte;Keratinocyte;Keratinocyte;Keratinocyte;Keratinocyte;Keratinocyte;Keratinocyte;Keratinocyte;Keratinocyte;Keratinocyte;Keratinocyte;Keratinocyte;Keratinocyte;Keratinocyte;Keratinocyte;Keratinocyte;Keratinocyte
chr1	6412441	6412641	Enhancer	CHD5;RNF207;RPL22;ICMT;LINC00337;GPR153;ACOT7;HES2;ESPN;RP1;TNFRSF25;PLEKHG5;RP11;NOL9;ZBTB48;PHF13;KLHL21;THAP3;DNAJC11;CAMTA1	Keratinocyte;Keratinocyte;Keratinocyte;Keratinocyte;Keratinocyte;Keratinocyte;Keratinocyte;Keratinocyte;Keratinocyte;Keratinocyte;Keratinocyte;Keratinocyte;Keratinocyte;Keratinocyte;Keratinocyte;Keratinocyte;Keratinocyte;Keratinocyte;Keratinocyte;Keratinocyte
chr1	6427557	6427757	Enhancer	CHD5;RNF207;RPL22;ICMT;GPR153;ACOT7;HES2;ESPN;RP1;TNFRSF25;PLEKHG5;RP11;NOL9;ZBTB48;PHF13;KLHL21;THAP3;DNAJC11;CAMTA1	Keratinocyte;Keratinocyte;Keratinocyte;Keratinocyte;Keratinocyte;Keratinocyte;Keratinocyte;Keratinocyte;Keratinocyte;Keratinocyte;Keratinocyte;Keratinocyte;Keratinocyte;Keratinocyte;Keratinocyte;Keratinocyte;Keratinocyte;Keratinocyte;Keratinocyte
chr1	6531160	6531360	Enhancer	RNF207;RPL22;ICMT;GPR153;ACOT7;HES2;ESPN;RP1;TNFRSF25;PLEKHG5;RP11;NOL9;PHF13;KLHL21;THAP3;CAMTA1	Keratinocyte;Keratinocyte;Keratinocyte;Keratinocyte;Keratinocyte;Keratinocyte;Keratinocyte;Keratinocyte;Keratinocyte;Keratinocyte;Keratinocyte;Keratinocyte;Keratinocyte;Keratinocyte;Keratinocyte;Keratinocyte
chr1	6531627	6531827	Enhancer	RNF207;RPL22;ICMT;GPR153;ACOT7;HES2;ESPN;RP1;TNFRSF25;PLEKHG5;RP11;PHF13;KLHL21;THAP3;CAMTA1	Keratinocyte;Keratinocyte;Keratinocyte;Keratinocyte;Keratinocyte;Keratinocyte;Keratinocyte;Keratinocyte;Keratinocyte;Keratinocyte;Keratinocyte;Keratinocyte;Keratinocyte;Keratinocyte;Keratinocyte
chr1	6822295	6822495	Enhancer	ACOT7;HES2;ESPN;PLEKHG5;RP11;NOL9;ZBTB48;PHF13;CAMTA1;RP11	Keratinocyte;Keratinocyte;Keratinocyte;Keratinocyte;Keratinocyte;Keratinocyte;Keratinocyte;Keratinocyte;Keratinocyte;Keratinocyte
chr1	6830665	6830865	Enhancer	ACOT7;HES2;PLEKHG5;RP11;NOL9;ZBTB48;PHF13;CAMTA1;RP11	Keratinocyte;Keratinocyte;Keratinocyte;Keratinocyte;Keratinocyte;Keratinocyte;Keratinocyte;Keratinocyte;Keratinocyte
chr1	6978518	6978718	Enhancer	PLEKHG5;NOL9;ZBTB48;PHF13;KLHL21;THAP3;DNAJC11	Keratinocyte;Keratinocyte;Keratinocyte;Keratinocyte;Keratinocyte;Keratinocyte;Keratinocyte
chr1	6978698	6978898	Enhancer	PLEKHG5;NOL9;ZBTB48;PHF13;KLHL21;THAP3;DNAJC11	Keratinocyte;Keratinocyte;Keratinocyte;Keratinocyte;Keratinocyte;Keratinocyte;Keratinocyte
chr1	8063523	8063723	Enhancer	VAMP3;PER3;RP3;UTS2;PARK7;ERRFI1;RP11;CTA;RP5	Keratinocyte;Keratinocyte;Keratinocyte;Keratinocyte;Keratinocyte;Keratinocyte;Keratinocyte;Keratinocyte;Keratinocyte
chr1	8064939	8065139	Enhancer	VAMP3;PER3;RP3;UTS2;PARK7;ERRFI1;RP11;CTA;RP5	Keratinocyte;Keratinocyte;Keratinocyte;Keratinocyte;Keratinocyte;Keratinocyte;Keratinocyte;Keratinocyte;Keratinocyte
chr1	8066715	8066915	Enhancer	VAMP3;PER3;RP3;UTS2;PARK7;ERRFI1;RP11;CTA	Keratinocyte;Keratinocyte;Keratinocyte;Keratinocyte;Keratinocyte;Keratinocyte;Keratinocyte;Keratinocyte
chr1	8066825	8067025	Enhancer	VAMP3;PER3;RP3;UTS2;PARK7;ERRFI1;RP11;CTA	Keratinocyte;Keratinocyte;Keratinocyte;Keratinocyte;Keratinocyte;Keratinocyte;Keratinocyte;Keratinocyte
chr1	8066876	8067076	Enhancer	VAMP3;PER3;RP3;UTS2;PARK7;ERRFI1;RP11;CTA	Keratinocyte;Keratinocyte;Keratinocyte;Keratinocyte;Keratinocyte;Keratinocyte;Keratinocyte;Keratinocyte
chr1	8116228	8116428	Enhancer	VAMP3;PER3;RP3;UTS2;PARK7;ERRFI1;CTA	Keratinocyte;Keratinocyte;Keratinocyte;Keratinocyte;Keratinocyte;Keratinocyte;Keratinocyte
chr1	8233875	8234075	Enhancer	VAMP3;PER3;RP3;UTS2;PARK7;ERRFI1;CTA	Keratinocyte;Keratinocyte;Keratinocyte;Keratinocyte;Keratinocyte;Keratinocyte;Keratinocyte
chr1	8965699	8965899	Enhancer	RP4;RP4;RP4;RERE;RP11;ENO1;ENO1;ENO1;HMGN2P17;RP3;CA6;SPSB1	Keratinocyte;Keratinocyte;Keratinocyte;Keratinocyte;Keratinocyte;Keratinocyte;Keratinocyte;Keratinocyte;Keratinocyte;Keratinocyte;Keratinocyte;Keratinocyte
chr1	9139206	9139406	Enhancer	RP4;RP4;RERE;ENO1;ENO1;SLC2A5;GPR157;RP3;H6PD;SPSB1;SLC25A33	Keratinocyte;Keratinocyte;Keratinocyte;Keratinocyte;Keratinocyte;Keratinocyte;Keratinocyte;Keratinocyte;Keratinocyte;Keratinocyte;Keratinocyte
chr1	9146191	9146391	Enhancer	RP4;RP4;RERE;ENO1;ENO1;SLC2A5;GPR157;RP3;H6PD;SPSB1	Keratinocyte;Keratinocyte;Keratinocyte;Keratinocyte;Keratinocyte;Keratinocyte;Keratinocyte;Keratinocyte;Keratinocyte;Keratinocyte
chr1	9146257	9146457	Enhancer	RP4;RP4;RERE;ENO1;ENO1;SLC2A5;GPR157;RP3;H6PD;SPSB1	Keratinocyte;Keratinocyte;Keratinocyte;Keratinocyte;Keratinocyte;Keratinocyte;Keratinocyte;Keratinocyte;Keratinocyte;Keratinocyte
chr1	9146269	9146469	Enhancer	RP4;RP4;RERE;ENO1;ENO1;SLC2A5;GPR157;RP3;H6PD;SPSB1	Keratinocyte;Keratinocyte;Keratinocyte;Keratinocyte;Keratinocyte;Keratinocyte;Keratinocyte;Keratinocyte;Keratinocyte;Keratinocyte
chr1	9187583	9187783	Enhancer	RP4;RP4;RERE;ENO1;ENO1;ENO1;RP3;SLC2A5;GPR157;SLC25A33	Keratinocyte;Keratinocyte;Keratinocyte;Keratinocyte;Keratinocyte;Keratinocyte;Keratinocyte;Keratinocyte;Keratinocyte;Keratinocyte
chr1	9187876	9188076	Enhancer	RP4;RP4;RERE;ENO1;ENO1;ENO1;RP3;SLC2A5;GPR157;SLC25A33	Keratinocyte;Keratinocyte;Keratinocyte;Keratinocyte;Keratinocyte;Keratinocyte;Keratinocyte;Keratinocyte;Keratinocyte;Keratinocyte
chr1	9465596	9465796	Enhancer	ENO1;CLSTN1;UBE4B	Keratinocyte;Keratinocyte;Keratinocyte
chr1	9466228	9466428	Enhancer	ENO1;CLSTN1;UBE4B	Keratinocyte;Keratinocyte;Keratinocyte
chr1	9503949	9504149	Enhancer	ENO1;H6PD;CLSTN1;RP11;CTNNBIP1;UBE4B	Keratinocyte;Keratinocyte;Keratinocyte;Keratinocyte;Keratinocyte;Keratinocyte
chr1	9504329	9504529	Enhancer	ENO1;H6PD;CLSTN1;RP11;CTNNBIP1;UBE4B	Keratinocyte;Keratinocyte;Keratinocyte;Keratinocyte;Keratinocyte;Keratinocyte
chr1	9835710	9835910	Enhancer	SPSB1;SLC25A33;RP13;TMEM201;PIK3CD;RP11;CLSTN1;RP11;CTNNBIP1;RP11;LZIC;NMNAT1;7SK;RP11;RBP7;AL590639.1;UBE4B;KIF1B;PGD	Keratinocyte;Keratinocyte;Keratinocyte;Keratinocyte;Keratinocyte;Keratinocyte;Keratinocyte;Keratinocyte;Keratinocyte;Keratinocyte;Keratinocyte;Keratinocyte;Keratinocyte;Keratinocyte;Keratinocyte;Keratinocyte;Keratinocyte;Keratinocyte;Keratinocyte
chr1	9867573	9867773	Enhancer	SPSB1;SLC25A33;RP13;TMEM201;PIK3CD;RP11;CLSTN1;RP11;CTNNBIP1;RP11;LZIC;NMNAT1;7SK;RP11;RBP7;AL590639.1;UBE4B;KIF1B;PGD	Keratinocyte;Keratinocyte;Keratinocyte;Keratinocyte;Keratinocyte;Keratinocyte;Keratinocyte;Keratinocyte;Keratinocyte;Keratinocyte;Keratinocyte;Keratinocyte;Keratinocyte;Keratinocyte;Keratinocyte;Keratinocyte;Keratinocyte;Keratinocyte;Keratinocyte
chr1	9868277	9868477	Enhancer	SPSB1;SLC25A33;RP13;TMEM201;PIK3CD;RP11;CLSTN1;RP11;CTNNBIP1;RP11;LZIC;NMNAT1;7SK;RP11;RBP7;AL590639.1;UBE4B;KIF1B;PGD	Keratinocyte;Keratinocyte;Keratinocyte;Keratinocyte;Keratinocyte;Keratinocyte;Keratinocyte;Keratinocyte;Keratinocyte;Keratinocyte;Keratinocyte;Keratinocyte;Keratinocyte;Keratinocyte;Keratinocyte;Keratinocyte;Keratinocyte;Keratinocyte;Keratinocyte
chr1	9938082	9938282	Enhancer	SPSB1;SLC25A33;RP13;TMEM201;PIK3CD;RP11;CLSTN1;RP11;CTNNBIP1;RP11;LZIC;NMNAT1;7SK;RP11;RBP7;AL590639.1;UBE4B;KIF1B;PGD	Keratinocyte;Keratinocyte;Keratinocyte;Keratinocyte;Keratinocyte;Keratinocyte;Keratinocyte;Keratinocyte;Keratinocyte;Keratinocyte;Keratinocyte;Keratinocyte;Keratinocyte;Keratinocyte;Keratinocyte;Keratinocyte;Keratinocyte;Keratinocyte;Keratinocyte
chr1	9938189	9938389	Enhancer	SPSB1;SLC25A33;RP13;TMEM201;PIK3CD;RP11;CLSTN1;RP11;CTNNBIP1;RP11;LZIC;NMNAT1;7SK;RP11;RBP7;AL590639.1;UBE4B;KIF1B;PGD	Keratinocyte;Keratinocyte;Keratinocyte;Keratinocyte;Keratinocyte;Keratinocyte;Keratinocyte;Keratinocyte;Keratinocyte;Keratinocyte;Keratinocyte;Keratinocyte;Keratinocyte;Keratinocyte;Keratinocyte;Keratinocyte;Keratinocyte;Keratinocyte;Keratinocyte
chr1	9938259	9938459	Enhancer	SPSB1;SLC25A33;RP13;TMEM201;PIK3CD;RP11;CLSTN1;RP11;CTNNBIP1;RP11;LZIC;NMNAT1;7SK;RP11;RBP7;AL590639.1;UBE4B;KIF1B;PGD	Keratinocyte;Keratinocyte;Keratinocyte;Keratinocyte;Keratinocyte;Keratinocyte;Keratinocyte;Keratinocyte;Keratinocyte;Keratinocyte;Keratinocyte;Keratinocyte;Keratinocyte;Keratinocyte;Keratinocyte;Keratinocyte;Keratinocyte;Keratinocyte;Keratinocyte
chr1	9938495	9938695	Enhancer	SPSB1;SLC25A33;RP13;TMEM201;PIK3CD;RP11;CLSTN1;RP11;CTNNBIP1;RP11;LZIC;NMNAT1;7SK;RP11;RBP7;AL590639.1;UBE4B;KIF1B;PGD	Keratinocyte;Keratinocyte;Keratinocyte;Keratinocyte;Keratinocyte;Keratinocyte;Keratinocyte;Keratinocyte;Keratinocyte;Keratinocyte;Keratinocyte;Keratinocyte;Keratinocyte;Keratinocyte;Keratinocyte;Keratinocyte;Keratinocyte;Keratinocyte;Keratinocyte
chr1	9953077	9953277	Enhancer	SPSB1;SLC25A33;RP13;TMEM201;PIK3CD;RP11;CLSTN1;RP11;CTNNBIP1;RP11;LZIC;NMNAT1;7SK;RP11;AL590639.1;UBE4B	Keratinocyte;Keratinocyte;Keratinocyte;Keratinocyte;Keratinocyte;Keratinocyte;Keratinocyte;Keratinocyte;Keratinocyte;Keratinocyte;Keratinocyte;Keratinocyte;Keratinocyte;Keratinocyte;Keratinocyte;Keratinocyte
chr1	9953201	9953401	Enhancer	SPSB1;SLC25A33;RP13;TMEM201;PIK3CD;RP11;CLSTN1;RP11;CTNNBIP1;RP11;LZIC;NMNAT1;7SK;RP11;AL590639.1;UBE4B	Keratinocyte;Keratinocyte;Keratinocyte;Keratinocyte;Keratinocyte;Keratinocyte;Keratinocyte;Keratinocyte;Keratinocyte;Keratinocyte;Keratinocyte;Keratinocyte;Keratinocyte;Keratinocyte;Keratinocyte;Keratinocyte
chr1	9953839	9954039	Enhancer	SPSB1;SLC25A33;RP13;TMEM201;PIK3CD;RP11;CLSTN1;RP11;CTNNBIP1;RP11;LZIC;NMNAT1;7SK;RP11;AL590639.1;UBE4B	Keratinocyte;Keratinocyte;Keratinocyte;Keratinocyte;Keratinocyte;Keratinocyte;Keratinocyte;Keratinocyte;Keratinocyte;Keratinocyte;Keratinocyte;Keratinocyte;Keratinocyte;Keratinocyte;Keratinocyte;Keratinocyte
chr1	9954175	9954375	Enhancer	SPSB1;SLC25A33;RP13;TMEM201;PIK3CD;RP11;CLSTN1;RP11;CTNNBIP1;RP11;LZIC;NMNAT1;7SK;RP11;AL590639.1;UBE4B	Keratinocyte;Keratinocyte;Keratinocyte;Keratinocyte;Keratinocyte;Keratinocyte;Keratinocyte;Keratinocyte;Keratinocyte;Keratinocyte;Keratinocyte;Keratinocyte;Keratinocyte;Keratinocyte;Keratinocyte;Keratinocyte
chr1	9968030	9968230	Enhancer	SPSB1;SLC25A33;RP13;TMEM201;PIK3CD;RP11;CLSTN1;RP11;CTNNBIP1;RP11;LZIC;NMNAT1;7SK;RP11;RBP7;KIF1B	Keratinocyte;Keratinocyte;Keratinocyte;Keratinocyte;Keratinocyte;Keratinocyte;Keratinocyte;Keratinocyte;Keratinocyte;Keratinocyte;Keratinocyte;Keratinocyte;Keratinocyte;Keratinocyte;Keratinocyte;Keratinocyte
chr1	10135523	10135723	Enhancer	TMEM201;PIK3CD;RP11;CLSTN1;CTNNBIP1;RP11;LZIC;NMNAT1;7SK;RP11;RBP7;AL590639.1;UBE4B;PGAM1P11;PEX14;DFFA	Keratinocyte;Keratinocyte;Keratinocyte;Keratinocyte;Keratinocyte;Keratinocyte;Keratinocyte;Keratinocyte;Keratinocyte;Keratinocyte;Keratinocyte;Keratinocyte;Keratinocyte;Keratinocyte;Keratinocyte;Keratinocyte
chr1	10271624	10271824	Enhancer	CLSTN1;CTNNBIP1;LZIC;NMNAT1;7SK;RP11;RBP7;AL590639.1;UBE4B;KIF1B;PEX14;DFFA	Keratinocyte;Keratinocyte;Keratinocyte;Keratinocyte;Keratinocyte;Keratinocyte;Keratinocyte;Keratinocyte;Keratinocyte;Keratinocyte;Keratinocyte;Keratinocyte
chr1	10272085	10272285	Enhancer	CLSTN1;CTNNBIP1;LZIC;NMNAT1;7SK;RP11;RBP7;AL590639.1;UBE4B;KIF1B;PEX14;DFFA	Keratinocyte;Keratinocyte;Keratinocyte;Keratinocyte;Keratinocyte;Keratinocyte;Keratinocyte;Keratinocyte;Keratinocyte;Keratinocyte;Keratinocyte;Keratinocyte
chr1	10516155	10516355	Enhancer	CLSTN1;KIF1B;PGD;APITD1;APITD1;CORT;RP5;PEX14;DFFA;AL139423.1;CASZ1;TARDBP	Keratinocyte;Keratinocyte;Keratinocyte;Keratinocyte;Keratinocyte;Keratinocyte;Keratinocyte;Keratinocyte;Keratinocyte;Keratinocyte;Keratinocyte;Keratinocyte
chr1	10517836	10518036	Enhancer	CLSTN1;KIF1B;PGD;APITD1;APITD1;CORT;RP5;PEX14;DFFA;AL139423.1;CASZ1;TARDBP	Keratinocyte;Keratinocyte;Keratinocyte;Keratinocyte;Keratinocyte;Keratinocyte;Keratinocyte;Keratinocyte;Keratinocyte;Keratinocyte;Keratinocyte;Keratinocyte
chr1	10518074	10518274	Enhancer	CLSTN1;KIF1B;PGD;APITD1;APITD1;CORT;RP5;PEX14;DFFA;AL139423.1;CASZ1;TARDBP	Keratinocyte;Keratinocyte;Keratinocyte;Keratinocyte;Keratinocyte;Keratinocyte;Keratinocyte;Keratinocyte;Keratinocyte;Keratinocyte;Keratinocyte;Keratinocyte
chr1	10518083	10518283	Enhancer	CLSTN1;KIF1B;PGD;APITD1;APITD1;CORT;RP5;PEX14;DFFA;AL139423.1;CASZ1;TARDBP	Keratinocyte;Keratinocyte;Keratinocyte;Keratinocyte;Keratinocyte;Keratinocyte;Keratinocyte;Keratinocyte;Keratinocyte;Keratinocyte;Keratinocyte;Keratinocyte
chr1	10704786	10704986	Enhancer	PGD;APITD1;APITD1;CORT;RP5;DFFA;AL139423.1;CASZ1;TARDBP	Keratinocyte;Keratinocyte;Keratinocyte;Keratinocyte;Keratinocyte;Keratinocyte;Keratinocyte;Keratinocyte;Keratinocyte
chr1	10704853	10705053	Enhancer	PGD;APITD1;APITD1;CORT;RP5;DFFA;AL139423.1;CASZ1;TARDBP	Keratinocyte;Keratinocyte;Keratinocyte;Keratinocyte;Keratinocyte;Keratinocyte;Keratinocyte;Keratinocyte;Keratinocyte
chr1	10757792	10757992	Enhancer	PGD;RP5;PEX14;DFFA;AL139423.1;TARDBP;MASP2;SRM;EXOSC10;MTOR	Keratinocyte;Keratinocyte;Keratinocyte;Keratinocyte;Keratinocyte;Keratinocyte;Keratinocyte;Keratinocyte;Keratinocyte;Keratinocyte
chr1	10757854	10758054	Enhancer	PGD;RP5;PEX14;DFFA;AL139423.1;TARDBP;MASP2;SRM;EXOSC10;MTOR	Keratinocyte;Keratinocyte;Keratinocyte;Keratinocyte;Keratinocyte;Keratinocyte;Keratinocyte;Keratinocyte;Keratinocyte;Keratinocyte
chr1	10758895	10759095	Enhancer	PGD;PEX14;DFFA;AL139423.1;CASZ1;TARDBP;MASP2;SRM;EXOSC10;MTOR	Keratinocyte;Keratinocyte;Keratinocyte;Keratinocyte;Keratinocyte;Keratinocyte;Keratinocyte;Keratinocyte;Keratinocyte;Keratinocyte
chr1	10760469	10760669	Enhancer	PGD;PEX14;DFFA;AL139423.1;CASZ1;TARDBP;MASP2;SRM;EXOSC10;MTOR	Keratinocyte;Keratinocyte;Keratinocyte;Keratinocyte;Keratinocyte;Keratinocyte;Keratinocyte;Keratinocyte;Keratinocyte;Keratinocyte
chr1	10784263	10784463	Enhancer	PGD;AL139423.1;CASZ1;TARDBP;MASP2;SRM;EXOSC10	Keratinocyte;Keratinocyte;Keratinocyte;Keratinocyte;Keratinocyte;Keratinocyte;Keratinocyte
chr1	10878631	10878831	Enhancer	PGD;APITD1;APITD1;DFFA;AL139423.1;MASP2;SRM;EXOSC10	Keratinocyte;Keratinocyte;Keratinocyte;Keratinocyte;Keratinocyte;Keratinocyte;Keratinocyte;Keratinocyte
chr1	10891431	10891631	Enhancer	PGD;APITD1;APITD1;PEX14;DFFA;AL139423.1;CASZ1;SRM;EXOSC10	Keratinocyte;Keratinocyte;Keratinocyte;Keratinocyte;Keratinocyte;Keratinocyte;Keratinocyte;Keratinocyte;Keratinocyte
chr1	11194578	11194778	Enhancer	TARDBP;MASP2;SRM;RP4;RP4;EXOSC10;MTOR;ANGPTL7;RPL39P6;MTOR;UBIAD1;RP4	HUVEC,Keratinocyte;HUVEC,Keratinocyte;HUVEC,Keratinocyte;HUVEC,Keratinocyte;HUVEC,Keratinocyte;HUVEC,Keratinocyte;HUVEC,Keratinocyte;HUVEC,Keratinocyte;HUVEC;HUVEC,Keratinocyte;HUVEC,Keratinocyte;HUVEC,Keratinocyte
chr1	11207607	11207807	Enhancer	TARDBP;SRM;RP4;RP4;EXOSC10;MTOR;RPL39P6;MTOR;UBIAD1;RP4	HUVEC;HUVEC;HUVEC;HUVEC;HUVEC;HUVEC;HUVEC;HUVEC;HUVEC;HUVEC
chr1	11376973	11377173	Enhancer	TARDBP;MASP2;SRM;EXOSC10;MTOR;UBIAD1;RP4	Keratinocyte;Keratinocyte;Keratinocyte;Keratinocyte;Keratinocyte;Keratinocyte;Keratinocyte
chr1	11401843	11402043	Enhancer	TARDBP;SRM;EXOSC10;UBIAD1	Keratinocyte;Keratinocyte;Keratinocyte;Keratinocyte
chr1	11619269	11619469	Enhancer	MTOR;UBIAD1;MFN2	Keratinocyte;Keratinocyte;Keratinocyte
chr1	12041752	12041952	Enhancer	FBXO44;FBXO6;MAD2L2;AGTRAP;C1orf167;CLCN6;MTHFR;NPPA;NPPA;RP5;RNU5E;RNU5E;KIAA2013;PLOD1;MFN2;MIIP;Y;AL096840.1;TNFRSF8;RP11;TNFRSF1B	HUVEC;HUVEC;HUVEC;HUVEC;HUVEC;HUVEC;HUVEC,Keratinocyte;HUVEC,Keratinocyte;HUVEC,Keratinocyte;HUVEC,Keratinocyte;HUVEC;HUVEC;HUVEC,Keratinocyte;HUVEC,Keratinocyte;HUVEC,Keratinocyte;HUVEC,Keratinocyte;HUVEC;HUVEC;HUVEC;HUVEC;HUVEC
chr1	12675868	12676068	Enhancer	VPS13D;SNORA59A;DHRS3	Keratinocyte;Keratinocyte;Keratinocyte
chr1	13926705	13926905	Enhancer	RP4;PDPN;PRDM2	Keratinocyte;Keratinocyte;Keratinocyte
chr1	13930686	13930886	Enhancer	RP4;PDPN;PRDM2	Keratinocyte;Keratinocyte;Keratinocyte
chr1	13946354	13946554	Enhancer	RP4;PDPN	Keratinocyte;Keratinocyte
chr1	14085721	14085921	Enhancer	RP4;PDPN;PRDM2	Keratinocyte;Keratinocyte;Keratinocyte
chr1	14127308	14127508	Enhancer	RP4;PDPN;PRDM2	Keratinocyte;Keratinocyte;Keratinocyte
chr1	14127692	14127892	Enhancer	RP4;PDPN;PRDM2	Keratinocyte;Keratinocyte;Keratinocyte
chr1	14128474	14128674	Enhancer	RP4;PDPN;PRDM2	Keratinocyte;Keratinocyte;Keratinocyte
chr1	15086257	15086457	Enhancer	KAZN;TBCAP2;TMEM51;EFHD2	Keratinocyte;Keratinocyte;Keratinocyte;Keratinocyte
chr1	15092281	15092481	Enhancer	KAZN;TBCAP2;TMEM51;EFHD2	Keratinocyte;Keratinocyte;Keratinocyte;Keratinocyte
chr1	15237958	15238158	Enhancer	KAZN;TBCAP2;TMEM51;C1orf195;RP1;FHAD1;EFHD2	Keratinocyte;Keratinocyte;Keratinocyte;Keratinocyte;Keratinocyte;Keratinocyte;Keratinocyte
chr1	15240529	15240729	Enhancer	KAZN;TBCAP2;TMEM51;EFHD2	Keratinocyte;Keratinocyte;Keratinocyte;Keratinocyte
chr1	15266085	15266285	Enhancer	KAZN;C1orf126;TMEM51;C1orf195;EFHD2	Keratinocyte;Keratinocyte;Keratinocyte;Keratinocyte;Keratinocyte
chr1	15314956	15315156	Enhancer	KAZN;TBCAP2;C1orf195;RP1	Keratinocyte;Keratinocyte;Keratinocyte;Keratinocyte
chr1	15611076	15611276	Enhancer	C1orf126;TMEM51;C1orf195;RP1;RSC1A1;PLEKHM2	Keratinocyte;Keratinocyte;Keratinocyte;Keratinocyte;Keratinocyte;Keratinocyte
chr1	15611282	15611482	Enhancer	C1orf126;TMEM51;C1orf195;RP1;RSC1A1;PLEKHM2	Keratinocyte;Keratinocyte;Keratinocyte;Keratinocyte;Keratinocyte;Keratinocyte
chr1	15691242	15691442	Enhancer	RP3;RP3	HUVEC;HUVEC
chr1	15745208	15745408	Enhancer	TMEM51;RP3;EFHD2;CTRC;CELA2A;CHCHD2P6;RSC1A1;PLEKHM2;RP11;FBLIM1;RP11;RP11;RP11	Keratinocyte;Keratinocyte;Keratinocyte;Keratinocyte;Keratinocyte;Keratinocyte;Keratinocyte;Keratinocyte;Keratinocyte;Keratinocyte;Keratinocyte;Keratinocyte;Keratinocyte
chr1	16092164	16092364	Enhancer	DNAJC16;AGMAT;CHCHD2P6;DDI2;RP11;RP11;FBLIM1;RP11;RP11;RP11;SPEN;RP11;ZBTB17;EPHA2;MT1XP1;C1orf144	Keratinocyte;Keratinocyte;Keratinocyte;Keratinocyte;Keratinocyte;Keratinocyte;Keratinocyte;Keratinocyte;Keratinocyte;Keratinocyte;Keratinocyte;Keratinocyte;Keratinocyte;Keratinocyte;Keratinocyte;Keratinocyte
chr1	16249862	16250062	Enhancer	DNAJC16;CHCHD2P6;DDI2;RSC1A1;PLEKHM2;SLC25A34;RP11;RP11;FBLIM1;RP11;RP11;RP11;SPEN;RP11;RP11;ZBTB17;EPHA2;MT1XP1;C1orf144;RP11;NECAP2	Keratinocyte;Keratinocyte;Keratinocyte;Keratinocyte;Keratinocyte;Keratinocyte;Keratinocyte;Keratinocyte;Keratinocyte;Keratinocyte;Keratinocyte;Keratinocyte;Keratinocyte;Keratinocyte;Keratinocyte;Keratinocyte;Keratinocyte;Keratinocyte;Keratinocyte;Keratinocyte;Keratinocyte
chr1	16509624	16509824	Enhancer	CHCHD2P6;PLEKHM2;SLC25A34;RP11;RP11;FBLIM1;RP11;RP11;RP11;RP11;CLCNKA;RP11;EPHA2;ARHGEF19;ANO7L1;FBXO42;C1orf144;RP11;NECAP2;CROCCP3;RP4	Keratinocyte;Keratinocyte;Keratinocyte;Keratinocyte;Keratinocyte;Keratinocyte;Keratinocyte;Keratinocyte;Keratinocyte;Keratinocyte;Keratinocyte;Keratinocyte;Keratinocyte;Keratinocyte;Keratinocyte;Keratinocyte;Keratinocyte;Keratinocyte;Keratinocyte;Keratinocyte;Keratinocyte
chr1	16620750	16620950	Enhancer	FBLIM1;RP11;RP11;RP11;EPHA2;C1orf134;RSG1;MT1XP1;FBXO42;C1orf144;RP11;NECAP2;RP4;CROCCP3;RP4;NBPF1;CROCCP2;EIF1AP1	Keratinocyte;Keratinocyte;Keratinocyte;Keratinocyte;Keratinocyte;Keratinocyte;Keratinocyte;Keratinocyte;Keratinocyte;Keratinocyte;Keratinocyte;Keratinocyte;Keratinocyte;Keratinocyte;Keratinocyte;Keratinocyte;Keratinocyte;Keratinocyte
chr1	16647939	16648139	Enhancer	PLEKHM2;FBLIM1;RP11;RP11;RP11;ZBTB17;RP11;EPHA2;ARHGEF19;ARHGEF19;ANO7L1;C1orf134;RSG1;MT1XP1;FBXO42;C1orf144;RP11;NECAP2;RP4;CROCCP3;RP4;RP5;NBPF1;CROCCP2;EIF1AP1	Keratinocyte;Keratinocyte;Keratinocyte;Keratinocyte;Keratinocyte;Keratinocyte;Keratinocyte;Keratinocyte;Keratinocyte;Keratinocyte;Keratinocyte;Keratinocyte;Keratinocyte;Keratinocyte;Keratinocyte;Keratinocyte;Keratinocyte;Keratinocyte;Keratinocyte;Keratinocyte;Keratinocyte;Keratinocyte;Keratinocyte;Keratinocyte;Keratinocyte
chr1	17330793	17330993	Enhancer	EIF1AP1;RP11;RP11;RP11;RP1;MFAP2;ATP13A2;SDHB;PADI1	Keratinocyte;Keratinocyte;Keratinocyte;Keratinocyte;Keratinocyte;Keratinocyte;Keratinocyte;Keratinocyte;Keratinocyte
chr1	17518985	17519185	Enhancer	RP11;PADI3;RCC2;ARHGEF10L	Keratinocyte;Keratinocyte;Keratinocyte;Keratinocyte
chr1	17519242	17519442	Enhancer	RP11;PADI3;RCC2;ARHGEF10L	Keratinocyte;Keratinocyte;Keratinocyte;Keratinocyte
chr1	17559482	17559682	Enhancer	RP11;RP11;PADI1;PADI3;RCC2;ARHGEF10L	Keratinocyte;Keratinocyte;Keratinocyte;Keratinocyte;Keratinocyte;Keratinocyte
chr1	17559506	17559706	Enhancer	RP11;RP11;PADI1;PADI3;RCC2;ARHGEF10L	Keratinocyte;Keratinocyte;Keratinocyte;Keratinocyte;Keratinocyte;Keratinocyte
chr1	17584603	17584803	Enhancer	EIF1AP1;RP11;MFAP2;ATP13A2;SDHB;RP11;PADI1;PADI3;RP1;RCC2;ARHGEF10L	Keratinocyte;Keratinocyte;Keratinocyte;Keratinocyte;Keratinocyte;Keratinocyte;Keratinocyte;Keratinocyte;Keratinocyte;Keratinocyte;Keratinocyte
chr1	17614180	17614380	Enhancer	EIF1AP1;RP11;MFAP2;SDHB;RP11;PADI1;PADI3;RCC2;ARHGEF10L	Keratinocyte;Keratinocyte;Keratinocyte;Keratinocyte;Keratinocyte;Keratinocyte;Keratinocyte;Keratinocyte;Keratinocyte
chr1	17616138	17616338	Enhancer	EIF1AP1;RP11;RP11;CROCC;MFAP2;SDHB;RP11;PADI1;PADI3;RCC2;ARHGEF10L	Keratinocyte;Keratinocyte;Keratinocyte;Keratinocyte;Keratinocyte;Keratinocyte;Keratinocyte;Keratinocyte;Keratinocyte;Keratinocyte;Keratinocyte
chr1	17786664	17786864	Enhancer	SDHB;PADI2;RP11;PADI1;RP1	Keratinocyte;Keratinocyte;Keratinocyte;Keratinocyte;Keratinocyte
chr1	17818635	17818835	Enhancer	RP11;SDHB;RP11;PADI1;PADI3;RP1	Keratinocyte;Keratinocyte;Keratinocyte;Keratinocyte;Keratinocyte;Keratinocyte
chr1	17914239	17914439	Enhancer	MFAP2;ATP13A2;SDHB;PADI2;RCC2;ARHGEF10L	Keratinocyte;Keratinocyte;Keratinocyte;Keratinocyte;Keratinocyte;Keratinocyte
chr1	18995361	18995561	Enhancer	IFFO2;MRTO4	Keratinocyte;Keratinocyte
chr1	18997366	18997566	Enhancer	IFFO2;MRTO4	Keratinocyte;Keratinocyte
chr1	19208597	19208797	Enhancer	TAS1R2;ALDH4A1;RP13;IFFO2;UBR4;RP1;MRTO4;AKR7L;PQLC2;CAPZB	Keratinocyte;Keratinocyte;Keratinocyte;Keratinocyte;Keratinocyte;Keratinocyte;Keratinocyte;Keratinocyte;Keratinocyte;Keratinocyte
chr1	19209006	19209206	Enhancer	TAS1R2;ALDH4A1;RP13;IFFO2;UBR4;RP1;MRTO4;AKR7L;PQLC2;CAPZB	Keratinocyte;Keratinocyte;Keratinocyte;Keratinocyte;Keratinocyte;Keratinocyte;Keratinocyte;Keratinocyte;Keratinocyte;Keratinocyte
chr1	19226219	19226419	Enhancer	TAS1R2;ALDH4A1;RP13;IFFO2;UBR4;RP1;MRTO4;KIAA0090;AKR7A2;PQLC2;CAPZB	Keratinocyte;Keratinocyte;Keratinocyte;Keratinocyte;Keratinocyte;Keratinocyte;Keratinocyte;Keratinocyte;Keratinocyte;Keratinocyte;Keratinocyte
chr1	19360478	19360678	Enhancer	TAS1R2;ALDH4A1;UBR4;RP1;MRTO4;KIAA0090;AKR7A2;PQLC2;AL445163.1;CAPZB;MINOS1;RP5;NBL1	Keratinocyte;Keratinocyte;Keratinocyte;Keratinocyte;Keratinocyte;Keratinocyte;Keratinocyte;Keratinocyte;Keratinocyte;Keratinocyte;Keratinocyte;Keratinocyte;Keratinocyte
chr1	19403206	19403406	Enhancer	TAS1R2;ALDH4A1;RP13;IFFO2;UBR4;MRTO4;KIAA0090;AL445163.1;CAPZB;MINOS1;RP5;NBL1	Keratinocyte;Keratinocyte;Keratinocyte;Keratinocyte;Keratinocyte;Keratinocyte;Keratinocyte;Keratinocyte;Keratinocyte;Keratinocyte;Keratinocyte;Keratinocyte
chr1	19408585	19408785	Enhancer	ALDH4A1;RP13;IFFO2;UBR4;RP1;AL445163.1;CAPZB;RP5;NBL1	Keratinocyte;Keratinocyte;Keratinocyte;Keratinocyte;Keratinocyte;Keratinocyte;Keratinocyte;Keratinocyte;Keratinocyte
chr1	19530076	19530276	Enhancer	ALDH4A1;RP13;IFFO2;UBR4;RP1;MRTO4;KIAA0090;AKR7L;AKR7A3;AL445163.1;CAPZB;MINOS1;RP5;NBL1	Keratinocyte;Keratinocyte;Keratinocyte;Keratinocyte;Keratinocyte;Keratinocyte;Keratinocyte;Keratinocyte;Keratinocyte;Keratinocyte;Keratinocyte;Keratinocyte;Keratinocyte;Keratinocyte
chr1	19687888	19688088	Enhancer	ALDH4A1;IFFO2;AKR7A2;PQLC2;AL445163.1;CAPZB;MINOS1;RP5;NBL1	Keratinocyte;Keratinocyte;Keratinocyte;Keratinocyte;Keratinocyte;Keratinocyte;Keratinocyte;Keratinocyte;Keratinocyte
chr1	19687950	19688150	Enhancer	ALDH4A1;IFFO2;AKR7A2;PQLC2;AL445163.1;CAPZB;MINOS1;RP5;NBL1	Keratinocyte;Keratinocyte;Keratinocyte;Keratinocyte;Keratinocyte;Keratinocyte;Keratinocyte;Keratinocyte;Keratinocyte
chr1	19687956	19688156	Enhancer	ALDH4A1;IFFO2;AKR7A2;PQLC2;AL445163.1;CAPZB;MINOS1;RP5;NBL1	Keratinocyte;Keratinocyte;Keratinocyte;Keratinocyte;Keratinocyte;Keratinocyte;Keratinocyte;Keratinocyte;Keratinocyte
chr1	19693684	19693884	Enhancer	ALDH4A1;IFFO2;UBR4;RP1;MRTO4;KIAA0090;AKR7L;AKR7A3;AKR7A2;PQLC2;AL445163.1;CAPZB;MINOS1;RP5;NBL1	Keratinocyte;Keratinocyte;Keratinocyte;Keratinocyte;Keratinocyte;Keratinocyte;Keratinocyte;Keratinocyte;Keratinocyte;Keratinocyte;Keratinocyte;Keratinocyte;Keratinocyte;Keratinocyte;Keratinocyte
chr1	19693861	19694061	Enhancer	ALDH4A1;IFFO2;UBR4;RP1;MRTO4;KIAA0090;AKR7L;AKR7A3;AKR7A2;PQLC2;AL445163.1;CAPZB;MINOS1;RP5;NBL1	Keratinocyte;Keratinocyte;Keratinocyte;Keratinocyte;Keratinocyte;Keratinocyte;Keratinocyte;Keratinocyte;Keratinocyte;Keratinocyte;Keratinocyte;Keratinocyte;Keratinocyte;Keratinocyte;Keratinocyte
chr1	19945058	19945258	Enhancer	UBR4;MRTO4;KIAA0090;AKR7A2;PQLC2;AL445163.1;CAPZB;MINOS1;RP5;NBL1;TMCO4;OTUD3	Keratinocyte;Keratinocyte;Keratinocyte;Keratinocyte;Keratinocyte;Keratinocyte;Keratinocyte;Keratinocyte;Keratinocyte;Keratinocyte;Keratinocyte;Keratinocyte
chr1	19946298	19946498	Enhancer	UBR4;MRTO4;KIAA0090;AKR7A2;PQLC2;AL445163.1;CAPZB;MINOS1;RP5;NBL1;OTUD3	Keratinocyte;Keratinocyte;Keratinocyte;Keratinocyte;Keratinocyte;Keratinocyte;Keratinocyte;Keratinocyte;Keratinocyte;Keratinocyte;Keratinocyte
chr1	20064583	20064783	Enhancer	MINOS1;RP5;NBL1;AKR7A2;PQLC2	HUVEC,Keratinocyte;HUVEC,Keratinocyte;HUVEC,Keratinocyte;Keratinocyte;Keratinocyte
chr1	20066192	20066392	Enhancer	MINOS1;RP5;NBL1;AKR7A2;PQLC2	HUVEC,Keratinocyte;HUVEC,Keratinocyte;HUVEC,Keratinocyte;Keratinocyte;Keratinocyte
chr1	20209748	20209948	Enhancer	AKR7A2;CAPZB;MINOS1;RP5;OTUD3	Keratinocyte;Keratinocyte;Keratinocyte;Keratinocyte;Keratinocyte
chr1	20685511	20685711	Enhancer	PINK1;AL391357.1;PINK1;DDOST;KIF17;SH2D5;RP5;HP1BP3	Keratinocyte;Keratinocyte;Keratinocyte;Keratinocyte;Keratinocyte;Keratinocyte;Keratinocyte;Keratinocyte
chr1	20685518	20685718	Enhancer	PINK1;AL391357.1;PINK1;DDOST;KIF17;SH2D5;RP5;HP1BP3	Keratinocyte;Keratinocyte;Keratinocyte;Keratinocyte;Keratinocyte;Keratinocyte;Keratinocyte;Keratinocyte
chr1	21051348	21051548	Enhancer	RP4;CAMK2N1;MUL1;CDA;PINK1;DDOST;KIF17;SH2D5;RP5;HP1BP3	Keratinocyte;Keratinocyte;Keratinocyte;Keratinocyte;Keratinocyte;Keratinocyte;Keratinocyte;Keratinocyte;Keratinocyte;Keratinocyte
chr1	21416070	21416270	Enhancer	CDA;SH2D5;RP11;EIF4G3;ECE1;PPP1R11P1;HS6ST1P1;NBPF3	Keratinocyte;Keratinocyte;Keratinocyte;Keratinocyte;Keratinocyte;Keratinocyte;Keratinocyte;Keratinocyte
chr1	21634338	21634538	Enhancer	EIF4G3;RP5;ECE1;PPP1R11P1;RP11;RP11;HS6ST1P1;NBPF3;PFN1P10	Keratinocyte;Keratinocyte;Keratinocyte;Keratinocyte;Keratinocyte;Keratinocyte;Keratinocyte;Keratinocyte;Keratinocyte
chr1	21634738	21634938	Enhancer	EIF4G3;RP5;ECE1;PPP1R11P1;RP11;RP11;HS6ST1P1;NBPF3;PFN1P10	Keratinocyte;Keratinocyte;Keratinocyte;Keratinocyte;Keratinocyte;Keratinocyte;Keratinocyte;Keratinocyte;Keratinocyte
chr1	21635937	21636137	Enhancer	EIF4G3;RP5;ECE1;PPP1R11P1;RP11;RP11;HS6ST1P1;NBPF3;PFN1P10	Keratinocyte;Keratinocyte;Keratinocyte;Keratinocyte;Keratinocyte;Keratinocyte;Keratinocyte;Keratinocyte;Keratinocyte
chr1	22231185	22231385	Enhancer	RP11;HSPG2;CDC42;CDC42;WNT4;RP11	Keratinocyte;Keratinocyte;Keratinocyte;Keratinocyte;Keratinocyte;Keratinocyte
chr1	22369576	22369776	Enhancer	LINC00339;CDC42;CDC42;WNT4;RP11;ZBTB40	Keratinocyte;Keratinocyte;Keratinocyte;Keratinocyte;Keratinocyte;Keratinocyte
chr1	22463784	22463984	Enhancer	USP48;RP11;HSPG2;CELA3B;LINC00339;CDC42;CDC42;WNT4;ZBTB40	Keratinocyte;Keratinocyte;Keratinocyte;Keratinocyte;Keratinocyte;Keratinocyte;Keratinocyte;Keratinocyte;Keratinocyte
chr1	22498463	22498663	Enhancer	USP48;RP11;HSPG2;LINC00339;CDC42;CDC42	Keratinocyte;Keratinocyte;Keratinocyte;Keratinocyte;Keratinocyte;Keratinocyte
chr1	22498833	22499033	Enhancer	USP48;RP11;HSPG2;LINC00339;CDC42;CDC42	Keratinocyte;Keratinocyte;Keratinocyte;Keratinocyte;Keratinocyte;Keratinocyte
chr1	24393417	24393617	Enhancer	RPL11;AL031295.1;TCEB3;PITHD1;LYPLA2;GALE;RP11;PNRC2;RP11	HUVEC;HUVEC;HUVEC;HUVEC;HUVEC;HUVEC;HUVEC;HUVEC;HUVEC
chr1	24532505	24532705	Enhancer	LYPLA2;GALE;HMGCL;FUCA1;RP11;RP11;PNRC2;IL28RA;GRHL3;NIPAL3;C1orf201;RCAN3;SRRM1;CLIC4	Keratinocyte;Keratinocyte;Keratinocyte;Keratinocyte;Keratinocyte;Keratinocyte;Keratinocyte;Keratinocyte;Keratinocyte;Keratinocyte;Keratinocyte;Keratinocyte;Keratinocyte;Keratinocyte
chr1	24620375	24620575	Enhancer	RPL11;PITHD1;LYPLA2;GALE;HMGCL;RP11;RP11;PNRC2;SRSF10;IL22RA1;GRHL3;RP11;NIPAL3;C1orf201;RCAN3;SRRM1;CLIC4	Keratinocyte;Keratinocyte;Keratinocyte;Keratinocyte;Keratinocyte;Keratinocyte;Keratinocyte;Keratinocyte;Keratinocyte;Keratinocyte;Keratinocyte;Keratinocyte;Keratinocyte;Keratinocyte;Keratinocyte;Keratinocyte;Keratinocyte
chr1	24627388	24627588	Enhancer	RPL11;PITHD1;LYPLA2;GALE;FUCA1;RP11;RP11;PNRC2;SRSF10;IL22RA1;IL28RA;GRHL3;RP11;NIPAL3;C1orf201;RCAN3;SRRM1;CLIC4	Keratinocyte;Keratinocyte;Keratinocyte;Keratinocyte;Keratinocyte;Keratinocyte;Keratinocyte;Keratinocyte;Keratinocyte;Keratinocyte;Keratinocyte;Keratinocyte;Keratinocyte;Keratinocyte;Keratinocyte;Keratinocyte;Keratinocyte;Keratinocyte
chr1	24628274	24628474	Enhancer	RPL11;PITHD1;LYPLA2;GALE;FUCA1;RP11;RP11;PNRC2;SRSF10;IL22RA1;IL28RA;GRHL3;RP11;NIPAL3;C1orf201;RCAN3;SRRM1;CLIC4	Keratinocyte;Keratinocyte;Keratinocyte;Keratinocyte;Keratinocyte;Keratinocyte;Keratinocyte;Keratinocyte;Keratinocyte;Keratinocyte;Keratinocyte;Keratinocyte;Keratinocyte;Keratinocyte;Keratinocyte;Keratinocyte;Keratinocyte;Keratinocyte
chr1	24700285	24700485	Enhancer	PITHD1;LYPLA2;GALE;RP11;PNRC2;SRSF10;IL22RA1;IL28RA;GRHL3;RP11;NIPAL3;C1orf201;RCAN3;SRRM1;CLIC4	Keratinocyte;Keratinocyte;Keratinocyte;Keratinocyte;Keratinocyte;Keratinocyte;Keratinocyte;Keratinocyte;Keratinocyte;Keratinocyte;Keratinocyte;Keratinocyte;Keratinocyte;Keratinocyte;Keratinocyte
chr1	24706408	24706608	Enhancer	PITHD1;LYPLA2;GALE;RP11;RP11;PNRC2;SRSF10;IL22RA1;IL28RA;GRHL3;RP11;NIPAL3;C1orf201;RCAN3;SRRM1;CLIC4	Keratinocyte;Keratinocyte;Keratinocyte;Keratinocyte;Keratinocyte;Keratinocyte;Keratinocyte;Keratinocyte;Keratinocyte;Keratinocyte;Keratinocyte;Keratinocyte;Keratinocyte;Keratinocyte;Keratinocyte;Keratinocyte
chr1	24842056	24842256	Enhancer	RP11;PNRC2;SRSF10;IL22RA1;IL28RA;GRHL3;RCAN3	Keratinocyte;Keratinocyte;Keratinocyte;Keratinocyte;Keratinocyte;Keratinocyte;Keratinocyte
chr1	24971664	24971864	Enhancer	IL28RA;GRHL3;RP11;C1orf130;SRRM1;CLIC4	Keratinocyte;Keratinocyte;Keratinocyte;Keratinocyte;Keratinocyte;Keratinocyte
chr1	25520990	25521190	Enhancer	SYF2;RP3;RHD;SDHDP6;RP11;TMEM50A;C1orf63;SDHDP1;RHCE;TMEM57;LDLRAP1	Keratinocyte;Keratinocyte;Keratinocyte;Keratinocyte;Keratinocyte;Keratinocyte;Keratinocyte;Keratinocyte;Keratinocyte;Keratinocyte;Keratinocyte
chr1	26217168	26217368	Enhancer	LDLRAP1;RP1;RP1;C1orf135;RP1;PAQR7;SNRPFP2;STMN1;PAFAH2;EXTL1;ZNF593;RP11;CNKSR1;CEP85;SH3BGRL3;UBXN11;DHDDS;RP3	Keratinocyte;Keratinocyte;Keratinocyte;Keratinocyte;Keratinocyte;Keratinocyte;Keratinocyte;Keratinocyte;Keratinocyte;Keratinocyte;Keratinocyte;Keratinocyte;Keratinocyte;Keratinocyte;Keratinocyte;Keratinocyte;Keratinocyte;Keratinocyte
chr1	26504448	26504648	Enhancer	SEPN1;FAM54B;RP1;PAQR7;ZNF593;RP11;CNKSR1;SH3BGRL3;CD52;UBXN11;RP11;DHDDS;RP3;HMGN2;RPS6KA1	Keratinocyte;Keratinocyte;Keratinocyte;Keratinocyte;Keratinocyte;Keratinocyte;Keratinocyte;Keratinocyte;Keratinocyte;Keratinocyte;Keratinocyte;Keratinocyte;Keratinocyte;Keratinocyte;Keratinocyte
chr1	26508420	26508620	Enhancer	FAM54B;RP1;PDIK1L;ZNF593;RP11;CNKSR1;UBXN11	Keratinocyte;Keratinocyte;Keratinocyte;Keratinocyte;Keratinocyte;Keratinocyte;Keratinocyte
chr1	26698534	26698734	Enhancer	PAFAH2;ZNF593;RP11;CNKSR1;CEP85;SH3BGRL3;CD52;UBXN11;RP3;RP3;HMGN2;RPS6KA1;PIGV;SFN;GPN2;RP11;OSTCP2;TRNP1;FAM46B	Keratinocyte;Keratinocyte;Keratinocyte;Keratinocyte;Keratinocyte;Keratinocyte;Keratinocyte;Keratinocyte;Keratinocyte;Keratinocyte;Keratinocyte;Keratinocyte;Keratinocyte;Keratinocyte;Keratinocyte;Keratinocyte;Keratinocyte;Keratinocyte;Keratinocyte
chr1	27080498	27080698	Enhancer	AIM1L;DHDDS;RP3;HMGN2;RPS6KA1;RP5;ARID1A;PIGV;ZDHHC18;SFN;RP1;GPN2;NUDC;GPATCH3;NR0B2;C1orf172;RP11;RP11;OSTCP2;TRNP1;FAM46B;SLC9A1;RP11;RP11;RP11;SNRPEP7;WDTC1;TMEM222;RP11;SYTL1;MAP3K6;CD164L2;GPR3;WASF2;AHDC1;RP1	Keratinocyte;Keratinocyte;Keratinocyte;Keratinocyte;Keratinocyte;Keratinocyte;Keratinocyte;Keratinocyte;Keratinocyte;Keratinocyte;Keratinocyte;Keratinocyte;Keratinocyte;Keratinocyte;Keratinocyte;Keratinocyte;Keratinocyte;Keratinocyte;Keratinocyte;Keratinocyte;Keratinocyte;Keratinocyte;Keratinocyte;Keratinocyte;Keratinocyte;Keratinocyte;Keratinocyte;Keratinocyte;Keratinocyte;Keratinocyte;Keratinoc…
chr1	27176467	27176667	Enhancer	SH3BGRL3;DHDDS;RP3;HMGN2;RPS6KA1;ARID1A;PIGV;ZDHHC18;SFN;RP1;GPN2;NUDC;GPATCH3;NR0B2;C1orf172;RP11;RP11;OSTCP2;TRNP1;FAM46B;SLC9A1;RP11;RP11;RP11;SNRPEP7;WDTC1;TMEM222;RP11;SYTL1;MAP3K6;CD164L2;GPR3;WASF2;RP1;AHDC1;RP11	Keratinocyte;Keratinocyte;Keratinocyte;Keratinocyte;Keratinocyte;Keratinocyte;Keratinocyte;Keratinocyte;Keratinocyte;Keratinocyte;Keratinocyte;Keratinocyte;Keratinocyte;Keratinocyte;Keratinocyte;Keratinocyte;Keratinocyte;Keratinocyte;Keratinocyte;Keratinocyte;Keratinocyte;Keratinocyte;Keratinocyte;Keratinocyte;Keratinocyte;Keratinocyte;Keratinocyte;Keratinocyte;Keratinocyte;Keratinocyte;Keratinoc…
chr1	27176585	27176785	Enhancer	SH3BGRL3;DHDDS;RP3;HMGN2;RPS6KA1;ARID1A;PIGV;ZDHHC18;SFN;RP1;GPN2;NUDC;GPATCH3;NR0B2;C1orf172;RP11;RP11;OSTCP2;TRNP1;FAM46B;SLC9A1;RP11;RP11;RP11;SNRPEP7;WDTC1;TMEM222;RP11;SYTL1;MAP3K6;CD164L2;GPR3;WASF2;RP1;AHDC1;RP11	Keratinocyte;Keratinocyte;Keratinocyte;Keratinocyte;Keratinocyte;Keratinocyte;Keratinocyte;Keratinocyte;Keratinocyte;Keratinocyte;Keratinocyte;Keratinocyte;Keratinocyte;Keratinocyte;Keratinocyte;Keratinocyte;Keratinocyte;Keratinocyte;Keratinocyte;Keratinocyte;Keratinocyte;Keratinocyte;Keratinocyte;Keratinocyte;Keratinocyte;Keratinocyte;Keratinocyte;Keratinocyte;Keratinocyte;Keratinocyte;Keratinoc…
chr1	27194235	27194435	Enhancer	SH3BGRL3;DHDDS;RP3;HMGN2;RPS6KA1;ARID1A;PIGV;ZDHHC18;SFN;RP1;GPN2;NUDC;GPATCH3;NR0B2;C1orf172;RP11;RP11;OSTCP2;TRNP1;FAM46B;SLC9A1;RP11;RP11;RP11;SNRPEP7;WDTC1;TMEM222;RP11;SYTL1	Keratinocyte;Keratinocyte;Keratinocyte;Keratinocyte;Keratinocyte;Keratinocyte;Keratinocyte;Keratinocyte;Keratinocyte;Keratinocyte;Keratinocyte;Keratinocyte;Keratinocyte;Keratinocyte;Keratinocyte;Keratinocyte;Keratinocyte;Keratinocyte;Keratinocyte;Keratinocyte;Keratinocyte;Keratinocyte;Keratinocyte;Keratinocyte;Keratinocyte;Keratinocyte;Keratinocyte;Keratinocyte;Keratinocyte
chr1	27331051	27331251	Enhancer	DHDDS;RP3;HMGN2;RPS6KA1;RP5;ARID1A;PIGV;ZDHHC18;SFN;RP1;GPN2;NUDC;GPATCH3;NR0B2;C1orf172;RP11;RP11;OSTCP2;TRNP1;FAM46B;SLC9A1;RP11;RP11;SNRPEP7;WDTC1;TMEM222;RP11;SYTL1;MAP3K6;CD164L2;GPR3	Keratinocyte;Keratinocyte;Keratinocyte;Keratinocyte;Keratinocyte;Keratinocyte;Keratinocyte;Keratinocyte;Keratinocyte;Keratinocyte;Keratinocyte;Keratinocyte;Keratinocyte;Keratinocyte;Keratinocyte;Keratinocyte;Keratinocyte;Keratinocyte;Keratinocyte;Keratinocyte;Keratinocyte;Keratinocyte;Keratinocyte;Keratinocyte;Keratinocyte;Keratinocyte;Keratinocyte;Keratinocyte;Keratinocyte;Keratinocyte;Keratinoc…
chr1	27334788	27334988	Enhancer	DHDDS;RP3;HMGN2;RPS6KA1;RP5;ARID1A;PIGV;ZDHHC18;SFN;RP1;GPN2;NUDC;GPATCH3;NR0B2;C1orf172;RP11;RP11;OSTCP2;TRNP1;FAM46B;SLC9A1;RP11;RP11;RP11;SNRPEP7;WDTC1;RP11;SYTL1;MAP3K6;CD164L2;GPR3	Keratinocyte;Keratinocyte;Keratinocyte;Keratinocyte;Keratinocyte;Keratinocyte;Keratinocyte;Keratinocyte;Keratinocyte;Keratinocyte;Keratinocyte;Keratinocyte;Keratinocyte;Keratinocyte;Keratinocyte;Keratinocyte;Keratinocyte;Keratinocyte;Keratinocyte;Keratinocyte;Keratinocyte;Keratinocyte;Keratinocyte;Keratinocyte;Keratinocyte;Keratinocyte;Keratinocyte;Keratinocyte;Keratinocyte;Keratinocyte;Keratinoc…
chr1	27359656	27359856	Enhancer	DHDDS;RP3;HMGN2;RPS6KA1;RP5;ARID1A;PIGV;ZDHHC18;SFN;RP1;GPN2;NUDC;GPATCH3;C1orf172;RP11;RP11;OSTCP2;TRNP1;SLC9A1;RP11;RP11;SNRPEP7;RP11;SYTL1;CD164L2;GPR3;WASF2;IFI6	Keratinocyte;Keratinocyte;Keratinocyte;Keratinocyte;Keratinocyte;Keratinocyte;Keratinocyte;Keratinocyte;Keratinocyte;Keratinocyte;Keratinocyte;Keratinocyte;Keratinocyte;Keratinocyte;Keratinocyte;Keratinocyte;Keratinocyte;Keratinocyte;Keratinocyte;Keratinocyte;Keratinocyte;Keratinocyte;Keratinocyte;Keratinocyte;Keratinocyte;Keratinocyte;Keratinocyte;Keratinocyte
chr1	27442442	27442642	Enhancer	RP3;HMGN2;RPS6KA1;RP5;ARID1A;PIGV;ZDHHC18;SFN;RP1;GPN2;NUDC;GPATCH3;C1orf172;RP11;RP11;OSTCP2;TRNP1;SLC9A1;RP11;RP11;SNRPEP7;WDTC1;TMEM222;RP11;SYTL1;MAP3K6;CD164L2;GPR3;WASF2;RP1;IFI6;RP3;STX12	Keratinocyte;Keratinocyte;Keratinocyte;Keratinocyte;Keratinocyte;Keratinocyte;Keratinocyte;Keratinocyte;Keratinocyte;Keratinocyte;Keratinocyte;Keratinocyte;Keratinocyte;Keratinocyte;Keratinocyte;Keratinocyte;Keratinocyte;Keratinocyte;Keratinocyte;Keratinocyte;Keratinocyte;Keratinocyte;Keratinocyte;Keratinocyte;Keratinocyte;Keratinocyte;Keratinocyte;Keratinocyte;Keratinocyte;Keratinocyte;Keratinoc…
chr1	27444313	27444513	Enhancer	HMGN2;RPS6KA1;RP5;ARID1A;PIGV;ZDHHC18;SFN;RP1;GPN2;NUDC;GPATCH3;C1orf172;RP11;RP11;OSTCP2;TRNP1;SLC9A1;RP11;RP11;SNRPEP7;WDTC1;TMEM222;RP11;SYTL1;MAP3K6;CD164L2;GPR3;WASF2;RP1;IFI6;RP3;STX12	Keratinocyte;Keratinocyte;Keratinocyte;Keratinocyte;Keratinocyte;Keratinocyte;Keratinocyte;Keratinocyte;Keratinocyte;Keratinocyte;Keratinocyte;Keratinocyte;Keratinocyte;Keratinocyte;Keratinocyte;Keratinocyte;Keratinocyte;Keratinocyte;Keratinocyte;Keratinocyte;Keratinocyte;Keratinocyte;Keratinocyte;Keratinocyte;Keratinocyte;Keratinocyte;Keratinocyte;Keratinocyte;Keratinocyte;Keratinocyte;Keratinoc…
chr1	27468192	27468392	Enhancer	RPS6KA1;RP5;ARID1A;PIGV;ZDHHC18;SFN;RP1;GPN2;NUDC;GPATCH3;C1orf172;RP11;RP11;OSTCP2;TRNP1;SLC9A1;RP11;RP11;RP11;SNRPEP7;WDTC1;TMEM222;RP11;SYTL1;MAP3K6;CD164L2;GPR3;RP4;WASF2;IFI6;FAM76A;RP3;STX12	Keratinocyte;Keratinocyte;Keratinocyte;Keratinocyte;Keratinocyte;Keratinocyte;Keratinocyte;Keratinocyte;Keratinocyte;Keratinocyte;Keratinocyte;Keratinocyte;Keratinocyte;Keratinocyte;Keratinocyte;Keratinocyte;Keratinocyte;Keratinocyte;Keratinocyte;Keratinocyte;Keratinocyte;Keratinocyte;Keratinocyte;Keratinocyte;Keratinocyte;Keratinocyte;Keratinocyte;Keratinocyte;Keratinocyte;Keratinocyte;Keratinoc…
chr1	27468672	27468872	Enhancer	RPS6KA1;RP5;ARID1A;PIGV;ZDHHC18;SFN;RP1;GPN2;NUDC;GPATCH3;C1orf172;RP11;RP11;OSTCP2;TRNP1;SLC9A1;RP11;RP11;RP11;SNRPEP7;WDTC1;TMEM222;RP11;SYTL1;MAP3K6;CD164L2;GPR3;RP4;WASF2;IFI6;FAM76A;RP3;STX12	Keratinocyte;Keratinocyte;Keratinocyte;Keratinocyte;Keratinocyte;Keratinocyte;Keratinocyte;Keratinocyte;Keratinocyte;Keratinocyte;Keratinocyte;Keratinocyte;Keratinocyte;Keratinocyte;Keratinocyte;Keratinocyte;Keratinocyte;Keratinocyte;Keratinocyte;Keratinocyte;Keratinocyte;Keratinocyte;Keratinocyte;Keratinocyte;Keratinocyte;Keratinocyte;Keratinocyte;Keratinocyte;Keratinocyte;Keratinocyte;Keratinoc…
chr1	27673675	27673875	Enhancer	SLC9A1;RP11;WDTC1;TMEM222;RP11;SYTL1;MAP3K6;FCN3	HUVEC;HUVEC;HUVEC;HUVEC;HUVEC;HUVEC;HUVEC;HUVEC
chr1	27676552	27676752	Enhancer	ARID1A;PIGV;ZDHHC18;SFN;GPN2;C1orf172;RP11;OSTCP2;TRNP1;FAM46B;RP11;RP11;SNRPEP7;WDTC1;TMEM222;RP11;SYTL1;MAP3K6;CD164L2;GPR3;RP4;WASF2;RP1;AHDC1;RP1;RP11;IFI6;FAM76A;RP3;RP3;AL020997.1;STX12;PPP1R8	Keratinocyte;Keratinocyte;Keratinocyte;Keratinocyte;Keratinocyte;Keratinocyte;Keratinocyte;Keratinocyte;Keratinocyte;Keratinocyte;Keratinocyte;Keratinocyte;Keratinocyte;Keratinocyte;Keratinocyte;Keratinocyte;Keratinocyte;Keratinocyte;Keratinocyte;Keratinocyte;Keratinocyte;Keratinocyte;Keratinocyte;Keratinocyte;Keratinocyte;Keratinocyte;Keratinocyte;Keratinocyte;Keratinocyte;Keratinocyte;Keratinoc…
chr1	27684394	27684594	Enhancer	ARID1A;PIGV;ZDHHC18;SFN;GPN2;NUDC;RP11;OSTCP2;TRNP1;FAM46B;RP11;RP11;RP11;SNRPEP7;WDTC1;TMEM222;RP11;SYTL1;MAP3K6;CD164L2;GPR3;RP4;WASF2;RP1;AHDC1;FGR;RP1;RP11;IFI6;FAM76A;RP3;RP3;AL020997.1;STX12;PPP1R8	Keratinocyte;Keratinocyte;Keratinocyte;Keratinocyte;Keratinocyte;Keratinocyte;Keratinocyte;Keratinocyte;Keratinocyte;Keratinocyte;Keratinocyte;Keratinocyte;Keratinocyte;Keratinocyte;Keratinocyte;Keratinocyte;Keratinocyte;Keratinocyte;Keratinocyte;Keratinocyte;Keratinocyte;Keratinocyte;Keratinocyte;Keratinocyte;Keratinocyte;Keratinocyte;Keratinocyte;Keratinocyte;Keratinocyte;Keratinocyte;Keratinoc…
chr1	27867222	27867422	Enhancer	ARID1A;ZDHHC18;GPN2;RP11;OSTCP2;TRNP1;FAM46B;RP11;RP11;SNRPEP7;TMEM222;RP11;SYTL1;MAP3K6;CD164L2;GPR3;RP4;RP1;AHDC1;RP1;RP11;IFI6;FAM76A;RP3;AL020997.1;STX12;PPP1R8;SCARNA1;C1orf38;RPA2;XKR8	Keratinocyte;Keratinocyte;Keratinocyte;Keratinocyte;Keratinocyte;Keratinocyte;Keratinocyte;Keratinocyte;Keratinocyte;Keratinocyte;Keratinocyte;Keratinocyte;Keratinocyte;Keratinocyte;Keratinocyte;Keratinocyte;Keratinocyte;Keratinocyte;Keratinocyte;Keratinocyte;Keratinocyte;Keratinocyte;Keratinocyte;Keratinocyte;Keratinocyte;Keratinocyte;Keratinocyte;Keratinocyte;Keratinocyte;Keratinocyte;Keratinoc…
chr1	27868515	27868715	Enhancer	ARID1A;PIGV;ZDHHC18;GPN2;RP11;OSTCP2;TRNP1;FAM46B;RP11;RP11;SNRPEP7;WDTC1;TMEM222;RP11;SYTL1;MAP3K6;CD164L2;GPR3;RP4;WASF2;RP1;AHDC1;RP11;IFI6;FAM76A;RP3;AL020997.1;STX12;PPP1R8;SCARNA1;RPA2	Keratinocyte;Keratinocyte;Keratinocyte;Keratinocyte;Keratinocyte;Keratinocyte;Keratinocyte;Keratinocyte;Keratinocyte;Keratinocyte;Keratinocyte;Keratinocyte;Keratinocyte;Keratinocyte;Keratinocyte;Keratinocyte;Keratinocyte;Keratinocyte;Keratinocyte;Keratinocyte;Keratinocyte;Keratinocyte;Keratinocyte;Keratinocyte;Keratinocyte;Keratinocyte;Keratinocyte;Keratinocyte;Keratinocyte;Keratinocyte;Keratinoc…
chr1	27869374	27869574	Enhancer	ARID1A;PIGV;ZDHHC18;GPN2;RP11;OSTCP2;TRNP1;FAM46B;RP11;RP11;SNRPEP7;WDTC1;TMEM222;RP11;SYTL1;MAP3K6;CD164L2;GPR3;RP4;WASF2;RP1;AHDC1;RP11;IFI6;FAM76A;RP3;AL020997.1;STX12;PPP1R8;SCARNA1;RPA2	Keratinocyte;Keratinocyte;Keratinocyte;Keratinocyte;Keratinocyte;Keratinocyte;Keratinocyte;Keratinocyte;Keratinocyte;Keratinocyte;Keratinocyte;Keratinocyte;Keratinocyte;Keratinocyte;Keratinocyte;Keratinocyte;Keratinocyte;Keratinocyte;Keratinocyte;Keratinocyte;Keratinocyte;Keratinocyte;Keratinocyte;Keratinocyte;Keratinocyte;Keratinocyte;Keratinocyte;Keratinocyte;Keratinocyte;Keratinocyte;Keratinoc…
chr1	28394158	28394358	Enhancer	IFI6;FAM76A;STX12;RP11;AL512288.1;EYA3;RP5;RP5;PTAFR;DNAJC8;ATPIF1;SESN2;MED18;PHACTR4;RCC1;SNHG3;SNORA73A;SNORA73B	Keratinocyte;Keratinocyte;Keratinocyte;Keratinocyte;Keratinocyte;Keratinocyte;Keratinocyte;Keratinocyte;Keratinocyte;Keratinocyte;Keratinocyte;Keratinocyte;Keratinocyte;Keratinocyte;Keratinocyte;Keratinocyte;Keratinocyte;Keratinocyte
chr1	28431548	28431748	Enhancer	RP1;FAM76A;RP3;STX12;RPA2;AL512288.1;EYA3;RP5;RP5;DNAJC8;SESN2;MED18;PHACTR4;RCC1;SNHG3;SNORA73A;SNORA73B;PRDX3P2;YTHDF2	Keratinocyte;Keratinocyte;Keratinocyte;Keratinocyte;Keratinocyte;Keratinocyte;Keratinocyte;Keratinocyte;Keratinocyte;Keratinocyte;Keratinocyte;Keratinocyte;Keratinocyte;Keratinocyte;Keratinocyte;Keratinocyte;Keratinocyte;Keratinocyte;Keratinocyte
chr1	29102419	29102619	Enhancer	RP5;ATPIF1;MED18;PHACTR4;RCC1;SNHG3;SNORA73A;SNORA73B;PRDX3P2;TRNAU1AP;SNHG12;TAF12;RP11;GMEB1;YTHDF2	Keratinocyte;Keratinocyte;Keratinocyte;Keratinocyte;Keratinocyte;Keratinocyte;Keratinocyte;Keratinocyte;Keratinocyte;Keratinocyte;Keratinocyte;Keratinocyte;Keratinocyte;Keratinocyte;Keratinocyte
chr1	31140813	31141013	Enhancer	PUM1;ZCCHC17	Keratinocyte;Keratinocyte
chr1	31485963	31486163	Enhancer	SDC3;PUM1;RP11;SNRNP40;ZCCHC17;FABP3;SERINC2;RP11;TINAGL1;PEF1	Keratinocyte;Keratinocyte;Keratinocyte;Keratinocyte;Keratinocyte;Keratinocyte;Keratinocyte;Keratinocyte;Keratinocyte;Keratinocyte
chr1	31520506	31520706	Enhancer	SDC3;PUM1;RP11;RP11;SNRNP40;ZCCHC17;FABP3;SERINC2;RP11;PEF1	Keratinocyte;Keratinocyte;Keratinocyte;Keratinocyte;Keratinocyte;Keratinocyte;Keratinocyte;Keratinocyte;Keratinocyte;Keratinocyte
chr1	31863298	31863498	Enhancer	PUM1;SNRNP40;ZCCHC17;RP11;FABP3;SERINC2;RP11;TINAGL1;PEF1;COL16A1;PTP4A2	Keratinocyte;Keratinocyte;Keratinocyte;Keratinocyte;Keratinocyte;Keratinocyte;Keratinocyte;Keratinocyte;Keratinocyte;Keratinocyte;Keratinocyte
chr1	32131904	32132104	Enhancer	SNRNP40;ZCCHC17;FABP3;SERINC2;RP11;RP11;RP11;TINAGL1;PEF1;RP11;COL16A1;BAI2;PTP4A2;KHDRBS1;CCDC28B	Keratinocyte;Keratinocyte;Keratinocyte;Keratinocyte;Keratinocyte;Keratinocyte;Keratinocyte;Keratinocyte;Keratinocyte;Keratinocyte;Keratinocyte;Keratinocyte;Keratinocyte;Keratinocyte;Keratinocyte
chr1	32166830	32167030	Enhancer	SNRNP40;ZCCHC17;FABP3;SERINC2;RP11;RP11;RP11;TINAGL1;PEF1;RP11;COL16A1;BAI2;RP4	Keratinocyte;Keratinocyte;Keratinocyte;Keratinocyte;Keratinocyte;Keratinocyte;Keratinocyte;Keratinocyte;Keratinocyte;Keratinocyte;Keratinocyte;Keratinocyte;Keratinocyte
chr1	32167358	32167558	Enhancer	SNRNP40;ZCCHC17;FABP3;SERINC2;RP11;RP11;RP11;TINAGL1;PEF1;RP11;COL16A1;BAI2;RP4	Keratinocyte;Keratinocyte;Keratinocyte;Keratinocyte;Keratinocyte;Keratinocyte;Keratinocyte;Keratinocyte;Keratinocyte;Keratinocyte;Keratinocyte;Keratinocyte;Keratinocyte
chr1	32167412	32167612	Enhancer	SNRNP40;ZCCHC17;FABP3;SERINC2;RP11;RP11;RP11;TINAGL1;PEF1;RP11;COL16A1;BAI2;RP4	Keratinocyte;Keratinocyte;Keratinocyte;Keratinocyte;Keratinocyte;Keratinocyte;Keratinocyte;Keratinocyte;Keratinocyte;Keratinocyte;Keratinocyte;Keratinocyte;Keratinocyte
chr1	32183242	32183442	Enhancer	SNRNP40;ZCCHC17;FABP3;SERINC2;RP11;TINAGL1;PEF1;RP11;KHDRBS1	Keratinocyte;Keratinocyte;Keratinocyte;Keratinocyte;Keratinocyte;Keratinocyte;Keratinocyte;Keratinocyte;Keratinocyte
chr1	33209353	33209553	Enhancer	MARCKSL1;BSDC1;ZBTB8OS;RBBP4;SYNC;KIAA1522;S100PBP;YARS;FNDC5;HPCA;TMEM54;RNF19B;AK2;ADC	Keratinocyte;Keratinocyte;Keratinocyte;Keratinocyte;Keratinocyte;Keratinocyte;Keratinocyte;Keratinocyte;Keratinocyte;Keratinocyte;Keratinocyte;Keratinocyte;Keratinocyte;Keratinocyte
chr1	33225875	33226075	Enhancer	BSDC1;ZBTB8OS;RBBP4;SYNC;KIAA1522;S100PBP;YARS;FNDC5;HPCA;TMEM54;RNF19B;AK2;ADC;7SK	Keratinocyte;Keratinocyte;Keratinocyte;Keratinocyte;Keratinocyte;Keratinocyte;Keratinocyte;Keratinocyte;Keratinocyte;Keratinocyte;Keratinocyte;Keratinocyte;Keratinocyte;Keratinocyte
chr1	33234387	33234587	Enhancer	ZBTB8A;ZBTB8OS;RBBP4;SYNC;KIAA1522;S100PBP;YARS;FNDC5;TMEM54;RNF19B;AK2;ADC	Keratinocyte;Keratinocyte;Keratinocyte;Keratinocyte;Keratinocyte;Keratinocyte;Keratinocyte;Keratinocyte;Keratinocyte;Keratinocyte;Keratinocyte;Keratinocyte
chr1	33246331	33246531	Enhancer	ZBTB8A;ZBTB8OS;RBBP4;SYNC;KIAA1522;S100PBP;YARS;HPCA;TMEM54;RNF19B;AK2;ADC	Keratinocyte;Keratinocyte;Keratinocyte;Keratinocyte;Keratinocyte;Keratinocyte;Keratinocyte;Keratinocyte;Keratinocyte;Keratinocyte;Keratinocyte;Keratinocyte
chr1	33419844	33420044	Enhancer	ZBTB8A;ZBTB8OS;RBBP4;SYNC;KIAA1522;S100PBP;YARS;FNDC5;HPCA;RNF19B;RP4;RP1;AK2;ADC;TRIM62;7SK	Keratinocyte;Keratinocyte;Keratinocyte;Keratinocyte;Keratinocyte;Keratinocyte;Keratinocyte;Keratinocyte;Keratinocyte;Keratinocyte;Keratinocyte;Keratinocyte;Keratinocyte;Keratinocyte;Keratinocyte;Keratinocyte
chr1	33513629	33513829	Enhancer	ZBTB8OS;RBBP4;SYNC;KIAA1522;S100PBP;YARS;FNDC5;HPCA;TMEM54;RNF19B;RP4;RP1;AK2;ADC;TRIM62;7SK;PHC2	Keratinocyte;Keratinocyte;Keratinocyte;Keratinocyte;Keratinocyte;Keratinocyte;Keratinocyte;Keratinocyte;Keratinocyte;Keratinocyte;Keratinocyte;Keratinocyte;Keratinocyte;Keratinocyte;Keratinocyte;Keratinocyte;Keratinocyte
chr1	33633117	33633317	Enhancer	KIAA1522;S100PBP;YARS;HPCA;TMEM54;RNF19B;AK2;TRIM62;7SK;PHC2;ZSCAN20	Keratinocyte;Keratinocyte;Keratinocyte;Keratinocyte;Keratinocyte;Keratinocyte;Keratinocyte;Keratinocyte;Keratinocyte;Keratinocyte;Keratinocyte
chr1	33642073	33642273	Enhancer	KIAA1522;S100PBP;YARS;HPCA;TMEM54;RP1;AK2;TRIM62;7SK;PHC2	Keratinocyte;Keratinocyte;Keratinocyte;Keratinocyte;Keratinocyte;Keratinocyte;Keratinocyte;Keratinocyte;Keratinocyte;Keratinocyte
chr1	33642094	33642294	Enhancer	KIAA1522;S100PBP;YARS;HPCA;TMEM54;RP1;AK2;TRIM62;7SK;PHC2	Keratinocyte;Keratinocyte;Keratinocyte;Keratinocyte;Keratinocyte;Keratinocyte;Keratinocyte;Keratinocyte;Keratinocyte;Keratinocyte
chr1	33793708	33793908	Enhancer	RNF19B;AK2;ADC;AL513327.1;RP11;7SK	Keratinocyte;Keratinocyte;Keratinocyte;Keratinocyte;Keratinocyte;Keratinocyte
chr1	35249139	35249339	Enhancer	GJB5;GJB4;GJB3;RP1;GJA4;RP5;C1orf212	Keratinocyte;Keratinocyte;Keratinocyte;Keratinocyte;Keratinocyte;Keratinocyte;Keratinocyte
chr1	35259646	35259846	Enhancer	GJB5;GJB4;GJB3;RP1;GJA4;C1orf212	Keratinocyte;Keratinocyte;Keratinocyte;Keratinocyte;Keratinocyte;Keratinocyte
chr1	35259650	35259850	Enhancer	GJB5;GJB4;GJB3;RP1;GJA4;C1orf212	Keratinocyte;Keratinocyte;Keratinocyte;Keratinocyte;Keratinocyte;Keratinocyte
chr1	36307008	36307208	Enhancer	PSMB2;C1orf216;EIF2C4;EIF2C1;MAP7D1;THRAP3;FAM176B;STK40;LSM10	HUVEC;HUVEC;HUVEC;HUVEC;HUVEC;HUVEC;HUVEC;HUVEC;HUVEC
chr1	36307144	36307344	Enhancer	PSMB2;C1orf216;EIF2C4;EIF2C1;MAP7D1;THRAP3;FAM176B;STK40;LSM10	HUVEC;HUVEC;HUVEC;HUVEC;HUVEC;HUVEC;HUVEC;HUVEC;HUVEC
chr1	36636735	36636935	Enhancer	EIF2C1;EIF2C3;RP4;ADPRHL2;COL8A2;TRAPPC3;MAP7D1;THRAP3;SH3D21;AL591845.1;FAM176B;STK40;LSM10;OSCP1;MRPS15	Keratinocyte;Keratinocyte;Keratinocyte;Keratinocyte;Keratinocyte;Keratinocyte;Keratinocyte;Keratinocyte;Keratinocyte;Keratinocyte;Keratinocyte;Keratinocyte;Keratinocyte;Keratinocyte;Keratinocyte
chr1	36637159	36637359	Enhancer	EIF2C1;EIF2C3;TEKT2;ADPRHL2;COL8A2;TRAPPC3;MAP7D1;THRAP3;SH3D21;AL591845.1;FAM176B;LSM10;MRPS15	Keratinocyte;Keratinocyte;Keratinocyte;Keratinocyte;Keratinocyte;Keratinocyte;Keratinocyte;Keratinocyte;Keratinocyte;Keratinocyte;Keratinocyte;Keratinocyte;Keratinocyte
chr1	36639794	36639994	Enhancer	EIF2C3;RP4;TEKT2;ADPRHL2;COL8A2;TRAPPC3;MAP7D1;THRAP3;AL591845.1;FAM176B;STK40;LSM10;MRPS15	Keratinocyte;Keratinocyte;Keratinocyte;Keratinocyte;Keratinocyte;Keratinocyte;Keratinocyte;Keratinocyte;Keratinocyte;Keratinocyte;Keratinocyte;Keratinocyte;Keratinocyte
chr1	36644057	36644257	Enhancer	EIF2C4;EIF2C3;RP4;TEKT2;ADPRHL2;COL8A2;TRAPPC3;MAP7D1;THRAP3;AL591845.1;FAM176B;STK40;LSM10;MRPS15	Keratinocyte;Keratinocyte;Keratinocyte;Keratinocyte;Keratinocyte;Keratinocyte;Keratinocyte;Keratinocyte;Keratinocyte;Keratinocyte;Keratinocyte;Keratinocyte;Keratinocyte;Keratinocyte
chr1	36644135	36644335	Enhancer	EIF2C4;EIF2C3;RP4;TEKT2;ADPRHL2;COL8A2;TRAPPC3;MAP7D1;THRAP3;AL591845.1;FAM176B;STK40;LSM10;MRPS15	Keratinocyte;Keratinocyte;Keratinocyte;Keratinocyte;Keratinocyte;Keratinocyte;Keratinocyte;Keratinocyte;Keratinocyte;Keratinocyte;Keratinocyte;Keratinocyte;Keratinocyte;Keratinocyte
chr1	36644346	36644546	Enhancer	EIF2C4;EIF2C3;RP4;TEKT2;ADPRHL2;COL8A2;TRAPPC3;MAP7D1;THRAP3;AL591845.1;FAM176B;STK40;LSM10;MRPS15	Keratinocyte;Keratinocyte;Keratinocyte;Keratinocyte;Keratinocyte;Keratinocyte;Keratinocyte;Keratinocyte;Keratinocyte;Keratinocyte;Keratinocyte;Keratinocyte;Keratinocyte;Keratinocyte
chr1	36848924	36849124	Enhancer	ADPRHL2;TRAPPC3;MAP7D1;THRAP3;STK40;LSM10;OSCP1;MRPS15	Keratinocyte;Keratinocyte;Keratinocyte;Keratinocyte;Keratinocyte;Keratinocyte;Keratinocyte;Keratinocyte
chr1	36902570	36902770	Enhancer	ADPRHL2;TRAPPC3;MAP7D1;THRAP3;SH3D21;AL591845.1;FAM176B;STK40;LSM10;OSCP1;MRPS15	Keratinocyte;Keratinocyte;Keratinocyte;Keratinocyte;Keratinocyte;Keratinocyte;Keratinocyte;Keratinocyte;Keratinocyte;Keratinocyte;Keratinocyte
chr1	38330881	38331081	Enhancer	RP11;C1orf122;MTF1;RP11;INPP5B	Keratinocyte;Keratinocyte;Keratinocyte;Keratinocyte;Keratinocyte
chr1	38530669	38530869	Enhancer	C1orf109;CDCA8;C1orf122;INPP5B;SF3A3;UTP11L;RP5;RP11	Keratinocyte;Keratinocyte;Keratinocyte;Keratinocyte;Keratinocyte;Keratinocyte;Keratinocyte;Keratinocyte
chr1	38583389	38583589	Enhancer	C1orf122;SF3A3;RP5	Keratinocyte;Keratinocyte;Keratinocyte
chr1	38583621	38583821	Enhancer	C1orf122;SF3A3;RP5	Keratinocyte;Keratinocyte;Keratinocyte
chr1	38591803	38592003	Enhancer	ZC3H12A;SNIP1;RP3;RSPO1;C1orf122;YRDC;MTF1;INPP5B;SF3A3;UTP11L;POU3F1	Keratinocyte;Keratinocyte;Keratinocyte;Keratinocyte;Keratinocyte;Keratinocyte;Keratinocyte;Keratinocyte;Keratinocyte;Keratinocyte;Keratinocyte
chr1	38978909	38979109	Enhancer	RRAGC;MYCBP;AKIRIN1;NDUFS5;MACF1	Keratinocyte;Keratinocyte;Keratinocyte;Keratinocyte;Keratinocyte
chr1	39196871	39197071	Enhancer	RP11;AKIRIN1;NDUFS5;MACF1;RP11	Keratinocyte;Keratinocyte;Keratinocyte;Keratinocyte;Keratinocyte
chr1	39337406	39337606	Enhancer	RP11;RRAGC;RP5;MYCBP;GJA9;RHBDL2;AKIRIN1;NDUFS5;MACF1;RP11;RP11	Keratinocyte;Keratinocyte;Keratinocyte;Keratinocyte;Keratinocyte;Keratinocyte;Keratinocyte;Keratinocyte;Keratinocyte;Keratinocyte;Keratinocyte
chr1	39416768	39416968	Enhancer	RP11;AKIRIN1;NDUFS5;MACF1;RP11;RP11;KIAA0754;PABPC4	Keratinocyte;Keratinocyte;Keratinocyte;Keratinocyte;Keratinocyte;Keratinocyte;Keratinocyte;Keratinocyte
chr1	40205166	40205366	Enhancer	KIAA0754;OXCT2P1;RP11;PPIEL;RP11;SNORA55;PABPC4;HEYL;PPIE;RP1;OXCT2;BMP8B;Y;TRIT1;RP1;MYCL1;MFSD2A;RP3;PPT1;MACF1;CAP1;RLF;ZMPSTE24	HUVEC;HUVEC;HUVEC,Keratinocyte;HUVEC,Keratinocyte;HUVEC,Keratinocyte;HUVEC;HUVEC;HUVEC;HUVEC,Keratinocyte;HUVEC,Keratinocyte;HUVEC;HUVEC,Keratinocyte;HUVEC;HUVEC,Keratinocyte;HUVEC,Keratinocyte;HUVEC,Keratinocyte;HUVEC,Keratinocyte;HUVEC,Keratinocyte;HUVEC,Keratinocyte;Keratinocyte;Keratinocyte;Keratinocyte;Keratinocyte
chr1	40318369	40318569	Enhancer	PPIE;RP1;BMP8B;RP1;TRIT1;RP1;MFSD2A;RP3;CAP1;PPT1;RP11;RLF;RP1;ZMPSTE24;RP1	Keratinocyte;Keratinocyte;Keratinocyte;Keratinocyte;Keratinocyte;Keratinocyte;Keratinocyte;Keratinocyte;Keratinocyte;Keratinocyte;Keratinocyte;Keratinocyte;Keratinocyte;Keratinocyte;Keratinocyte
chr1	40423453	40423653	Enhancer	PABPC4;PPIE;RP1;TRIT1;RP1;MYCL1;MFSD2A;RP3;CAP1;PPT1;RP11;RLF;ZMPSTE24;RP1;COL9A2;SMAP2;RP1	Keratinocyte;Keratinocyte;Keratinocyte;Keratinocyte;Keratinocyte;Keratinocyte;Keratinocyte;Keratinocyte;Keratinocyte;Keratinocyte;Keratinocyte;Keratinocyte;Keratinocyte;Keratinocyte;Keratinocyte;Keratinocyte;Keratinocyte
chr1	40435080	40435280	Enhancer	PABPC4;PPIE;RP1;TRIT1;RP1;MYCL1;MFSD2A;RP3;CAP1;PPT1;RP11;RLF;ZMPSTE24;RP1;COL9A2;SMAP2;RP1	Keratinocyte;Keratinocyte;Keratinocyte;Keratinocyte;Keratinocyte;Keratinocyte;Keratinocyte;Keratinocyte;Keratinocyte;Keratinocyte;Keratinocyte;Keratinocyte;Keratinocyte;Keratinocyte;Keratinocyte;Keratinocyte;Keratinocyte
chr1	40446219	40446419	Enhancer	PABPC4;PPIE;RP1;TRIT1;RP1;MYCL1;MFSD2A;RP3;PPT1;RP11;RLF;ZMPSTE24;RP1;SMAP2	Keratinocyte;Keratinocyte;Keratinocyte;Keratinocyte;Keratinocyte;Keratinocyte;Keratinocyte;Keratinocyte;Keratinocyte;Keratinocyte;Keratinocyte;Keratinocyte;Keratinocyte;Keratinocyte
chr1	40943813	40944013	Enhancer	ZMPSTE24;ZNF643;RP1;ZNF642;RP11;DEM1;RP11;RP11;ZNF684	Keratinocyte;Keratinocyte;Keratinocyte;Keratinocyte;Keratinocyte;Keratinocyte;Keratinocyte;Keratinocyte;Keratinocyte
chr1	41202118	41202318	Enhancer	SMAP2;RP1;ZNF684;RIMS3;NFYC;KCNQ4;CITED4	Keratinocyte;Keratinocyte;Keratinocyte;Keratinocyte;Keratinocyte;Keratinocyte;Keratinocyte
chr1	41324294	41324494	Enhancer	RP1;DEM1;RP11;RIMS3;NFYC;CITED4;CTPS;SLFNL1;SCMH1	Keratinocyte;Keratinocyte;Keratinocyte;Keratinocyte;Keratinocyte;Keratinocyte;Keratinocyte;Keratinocyte;Keratinocyte
chr1	41326217	41326417	Enhancer	RP1;DEM1;RP11;RIMS3;NFYC;CITED4;CTPS;SCMH1	Keratinocyte;Keratinocyte;Keratinocyte;Keratinocyte;Keratinocyte;Keratinocyte;Keratinocyte;Keratinocyte
chr1	41352404	41352604	Enhancer	DEM1;RP11;NFYC;SCMH1	Keratinocyte;Keratinocyte;Keratinocyte;Keratinocyte
chr1	41388536	41388736	Enhancer	DEM1;RP11;NFYC;SCMH1	Keratinocyte;Keratinocyte;Keratinocyte;Keratinocyte
chr1	41512296	41512496	Enhancer	CITED4;CTPS;SLFNL1	Keratinocyte;Keratinocyte;Keratinocyte
chr1	41949661	41949861	Enhancer	EDN2;RP11	Keratinocyte;Keratinocyte
chr1	42269381	42269581	Enhancer	RP11	Keratinocyte
chr1	43000972	43001172	Enhancer	PPCS;TMSB4XP1;CLDN19;LEPRE1;C1orf50;RP11;ATP6V1E1P1;SLC2A1;RP5;EBNA1BP2;TMEM125;C1orf210;CDC20;MED8;SZT2;HYI	Keratinocyte;Keratinocyte;Keratinocyte;Keratinocyte;Keratinocyte;Keratinocyte;Keratinocyte;Keratinocyte;Keratinocyte;Keratinocyte;Keratinocyte;Keratinocyte;Keratinocyte;Keratinocyte;Keratinocyte;Keratinocyte
chr1	43409093	43409293	Enhancer	PPIH;YBX1;RP11;RP11;RP11;ATP6V1E1P1;SLC2A1;RP5;FAM183A;WDR65;EBNA1BP2;TMEM125;C1orf210;RP1;CDC20;ELOVL1;MED8;SZT2;SZT2;HYI;PTPRF;KDM4A;ST3GAL3	Keratinocyte;Keratinocyte;Keratinocyte;Keratinocyte;Keratinocyte;Keratinocyte;Keratinocyte;Keratinocyte;Keratinocyte;Keratinocyte;Keratinocyte;Keratinocyte;Keratinocyte;Keratinocyte;Keratinocyte;Keratinocyte;Keratinocyte;Keratinocyte;Keratinocyte;Keratinocyte;Keratinocyte;Keratinocyte;Keratinocyte
chr1	43412652	43412852	Enhancer	TMSB4XP1;PPIH;YBX1;LEPRE1;C1orf50;RP5;ERMAP;CCDC23;RP11;RP11;RP11;ZNF691;RP11;RP11;ATP6V1E1P1;SLC2A1;RP5;FAM183A;WDR65;EBNA1BP2;TMEM125;C1orf210;RP1;CDC20;ELOVL1;RP1;MED8;SZT2;SZT2;HYI;PTPRF;KDM4A;ST3GAL3	Keratinocyte;Keratinocyte;Keratinocyte;Keratinocyte;Keratinocyte;Keratinocyte;Keratinocyte;Keratinocyte;Keratinocyte;Keratinocyte;Keratinocyte;Keratinocyte;Keratinocyte;Keratinocyte;Keratinocyte;Keratinocyte;Keratinocyte;Keratinocyte;Keratinocyte;Keratinocyte;Keratinocyte;Keratinocyte;Keratinocyte;Keratinocyte;Keratinocyte;Keratinocyte;Keratinocyte;Keratinocyte;Keratinocyte;Keratinocyte;Keratinoc…
chr1	43419375	43419575	Enhancer	TMSB4XP1;PPIH;RP5;YBX1;CLDN19;LEPRE1;C1orf50;RP5;ERMAP;CCDC23;RP11;RP11;RP11;ZNF691;RP11;RP11;ATP6V1E1P1;SLC2A1;RP5;FAM183A;WDR65;EBNA1BP2;TMEM125;C1orf210;RP1;CDC20;ELOVL1;MED8;SZT2;PTPRF	Keratinocyte;Keratinocyte;Keratinocyte;Keratinocyte;Keratinocyte;Keratinocyte;Keratinocyte;Keratinocyte;Keratinocyte;Keratinocyte;Keratinocyte;Keratinocyte;Keratinocyte;Keratinocyte;Keratinocyte;Keratinocyte;Keratinocyte;Keratinocyte;Keratinocyte;Keratinocyte;Keratinocyte;Keratinocyte;Keratinocyte;Keratinocyte;Keratinocyte;Keratinocyte;Keratinocyte;Keratinocyte;Keratinocyte;Keratinocyte
chr1	43487259	43487459	Enhancer	PPCS;TMSB4XP1;PPIH;RP5;YBX1;LEPRE1;C1orf50;RP5;ERMAP;CCDC23;RP11;RP11;RP11;ZNF691;RP11;RP11;ATP6V1E1P1;SLC2A1;RP5;WDR65;EBNA1BP2;TMEM125;C1orf210;RP1;CDC20;ELOVL1;MED8;SZT2;SZT2;HYI;PTPRF	Keratinocyte;Keratinocyte;Keratinocyte;Keratinocyte;Keratinocyte;Keratinocyte;Keratinocyte;Keratinocyte;Keratinocyte;Keratinocyte;Keratinocyte;Keratinocyte;Keratinocyte;Keratinocyte;Keratinocyte;Keratinocyte;Keratinocyte;Keratinocyte;Keratinocyte;Keratinocyte;Keratinocyte;Keratinocyte;Keratinocyte;Keratinocyte;Keratinocyte;Keratinocyte;Keratinocyte;Keratinocyte;Keratinocyte;Keratinocyte;Keratinoc…
chr1	43488042	43488242	Enhancer	PPCS;TMSB4XP1;PPIH;RP5;YBX1;LEPRE1;C1orf50;RP5;ERMAP;CCDC23;RP11;RP11;RP11;ZNF691;RP11;RP11;ATP6V1E1P1;SLC2A1;RP5;WDR65;EBNA1BP2;TMEM125;C1orf210;RP1;CDC20;ELOVL1;MED8;SZT2;SZT2;HYI;PTPRF	Keratinocyte;Keratinocyte;Keratinocyte;Keratinocyte;Keratinocyte;Keratinocyte;Keratinocyte;Keratinocyte;Keratinocyte;Keratinocyte;Keratinocyte;Keratinocyte;Keratinocyte;Keratinocyte;Keratinocyte;Keratinocyte;Keratinocyte;Keratinocyte;Keratinocyte;Keratinocyte;Keratinocyte;Keratinocyte;Keratinocyte;Keratinocyte;Keratinocyte;Keratinocyte;Keratinocyte;Keratinocyte;Keratinocyte;Keratinocyte;Keratinoc…
chr1	43514655	43514855	Enhancer	PPCS;TMSB4XP1;PPIH;RP5;YBX1;CLDN19;LEPRE1;C1orf50;RP5;ERMAP;CCDC23;RP11;RP11;ZNF691;RP11;RP11;ATP6V1E1P1;SLC2A1;RP5;WDR65;EBNA1BP2;TMEM125;C1orf210;RP1;CDC20;ELOVL1;MED8;SZT2;SZT2;HYI;PTPRF;ST3GAL3;RP11	Keratinocyte;Keratinocyte;Keratinocyte;Keratinocyte;Keratinocyte;Keratinocyte;Keratinocyte;Keratinocyte;Keratinocyte;Keratinocyte;Keratinocyte;Keratinocyte;Keratinocyte;Keratinocyte;Keratinocyte;Keratinocyte;Keratinocyte;Keratinocyte;Keratinocyte;Keratinocyte;Keratinocyte;Keratinocyte;Keratinocyte;Keratinocyte;Keratinocyte;Keratinocyte;Keratinocyte;Keratinocyte;Keratinocyte;Keratinocyte;Keratinoc…
chr1	43515055	43515255	Enhancer	PPCS;TMSB4XP1;PPIH;RP5;YBX1;CLDN19;LEPRE1;C1orf50;RP5;ERMAP;CCDC23;RP11;RP11;ZNF691;RP11;RP11;ATP6V1E1P1;SLC2A1;RP5;WDR65;EBNA1BP2;TMEM125;C1orf210;RP1;CDC20;ELOVL1;MED8;SZT2;SZT2;HYI;PTPRF;ST3GAL3;RP11	Keratinocyte;Keratinocyte;Keratinocyte;Keratinocyte;Keratinocyte;Keratinocyte;Keratinocyte;Keratinocyte;Keratinocyte;Keratinocyte;Keratinocyte;Keratinocyte;Keratinocyte;Keratinocyte;Keratinocyte;Keratinocyte;Keratinocyte;Keratinocyte;Keratinocyte;Keratinocyte;Keratinocyte;Keratinocyte;Keratinocyte;Keratinocyte;Keratinocyte;Keratinocyte;Keratinocyte;Keratinocyte;Keratinocyte;Keratinocyte;Keratinoc…
chr1	43750593	43750793	Enhancer	RP5;YBX1;CLDN19;LEPRE1;C1orf50;RP5;ERMAP;CCDC23;RP11;RP11;RP11;ZNF691;RP11;RP11;ATP6V1E1P1;SLC2A1;RP5;FAM183A;WDR65;EBNA1BP2;TMEM125;C1orf210;TIE1;ELOVL1;RP1;MED8;SZT2;PTPRF;KDM4A;ST3GAL3;RP11;ARTN	Keratinocyte;Keratinocyte;Keratinocyte;Keratinocyte;Keratinocyte;Keratinocyte;Keratinocyte;Keratinocyte;Keratinocyte;Keratinocyte;Keratinocyte;Keratinocyte;Keratinocyte;Keratinocyte;Keratinocyte;Keratinocyte;Keratinocyte;Keratinocyte;Keratinocyte;Keratinocyte;Keratinocyte;Keratinocyte;Keratinocyte;Keratinocyte;Keratinocyte;Keratinocyte;Keratinocyte;Keratinocyte;Keratinocyte;Keratinocyte;Keratinoc…
chr1	43814069	43814269	Enhancer	TMSB4XP1;LEPRE1;C1orf50;RP5;ERMAP;CCDC23;RP11;RP11;RP11;ZNF691;RP11;RP11;ATP6V1E1P1;SLC2A1;RP5;FAM183A;WDR65;RP1;CDC20;ELOVL1;RP1;MED8;SZT2;SZT2;HYI;HYI;KDM4A;ST3GAL3;RP11;ARTN;ATP6V0B;B4GALT2	Keratinocyte;Keratinocyte;Keratinocyte;Keratinocyte;Keratinocyte;Keratinocyte;Keratinocyte;Keratinocyte;Keratinocyte;Keratinocyte;Keratinocyte;Keratinocyte;Keratinocyte;Keratinocyte;Keratinocyte;Keratinocyte;Keratinocyte;Keratinocyte;Keratinocyte;Keratinocyte;Keratinocyte;Keratinocyte;Keratinocyte;Keratinocyte;Keratinocyte;Keratinocyte;Keratinocyte;Keratinocyte;Keratinocyte;Keratinocyte;Keratinoc…
chr1	43814258	43814458	Enhancer	TMSB4XP1;LEPRE1;C1orf50;RP5;ERMAP;CCDC23;RP11;RP11;RP11;ZNF691;RP11;RP11;ATP6V1E1P1;SLC2A1;RP5;FAM183A;WDR65;RP1;CDC20;ELOVL1;RP1;MED8;SZT2;SZT2;HYI;HYI;KDM4A;ST3GAL3;RP11;ARTN;ATP6V0B;B4GALT2	Keratinocyte;Keratinocyte;Keratinocyte;Keratinocyte;Keratinocyte;Keratinocyte;Keratinocyte;Keratinocyte;Keratinocyte;Keratinocyte;Keratinocyte;Keratinocyte;Keratinocyte;Keratinocyte;Keratinocyte;Keratinocyte;Keratinocyte;Keratinocyte;Keratinocyte;Keratinocyte;Keratinocyte;Keratinocyte;Keratinocyte;Keratinocyte;Keratinocyte;Keratinocyte;Keratinocyte;Keratinocyte;Keratinocyte;Keratinocyte;Keratinoc…
chr1	43997980	43998180	Enhancer	LEPRE1;RP11;ZNF691;RP11;RP11;ATP6V1E1P1;SLC2A1;FAM183A;WDR65;EBNA1BP2;TMEM125;C1orf210;TIE1;RP1;CDC20;ELOVL1;MED8;SZT2;HYI;HYI;PTPRF;KDM4A;ST3GAL3;RP11;SHMT1P1;ARTN;RP11;IPO13;DPH2;ATP6V0B;B4GALT2;CCDC24;RP11	Keratinocyte;Keratinocyte;Keratinocyte;Keratinocyte;Keratinocyte;Keratinocyte;Keratinocyte;Keratinocyte;Keratinocyte;Keratinocyte;Keratinocyte;Keratinocyte;Keratinocyte;Keratinocyte;Keratinocyte;Keratinocyte;Keratinocyte;Keratinocyte;Keratinocyte;Keratinocyte;Keratinocyte;Keratinocyte;Keratinocyte;Keratinocyte;Keratinocyte;Keratinocyte;Keratinocyte;Keratinocyte;Keratinocyte;Keratinocyte;Keratinoc…
chr1	43998194	43998394	Enhancer	LEPRE1;RP11;ZNF691;RP11;RP11;ATP6V1E1P1;SLC2A1;FAM183A;WDR65;EBNA1BP2;TMEM125;C1orf210;TIE1;RP1;CDC20;ELOVL1;MED8;SZT2;HYI;HYI;PTPRF;KDM4A;ST3GAL3;RP11;SHMT1P1;ARTN;RP11;IPO13;DPH2;ATP6V0B;B4GALT2;CCDC24;RP11	Keratinocyte;Keratinocyte;Keratinocyte;Keratinocyte;Keratinocyte;Keratinocyte;Keratinocyte;Keratinocyte;Keratinocyte;Keratinocyte;Keratinocyte;Keratinocyte;Keratinocyte;Keratinocyte;Keratinocyte;Keratinocyte;Keratinocyte;Keratinocyte;Keratinocyte;Keratinocyte;Keratinocyte;Keratinocyte;Keratinocyte;Keratinocyte;Keratinocyte;Keratinocyte;Keratinocyte;Keratinocyte;Keratinocyte;Keratinocyte;Keratinoc…
chr1	43998920	43999120	Enhancer	LEPRE1;RP11;ZNF691;RP11;RP11;ATP6V1E1P1;SLC2A1;FAM183A;WDR65;EBNA1BP2;TMEM125;C1orf210;TIE1;RP1;CDC20;ELOVL1;MED8;SZT2;HYI;HYI;PTPRF;KDM4A;ST3GAL3;RP11;SHMT1P1;ARTN;RP11;IPO13;DPH2;ATP6V0B;B4GALT2;CCDC24;RP11	Keratinocyte;Keratinocyte;Keratinocyte;Keratinocyte;Keratinocyte;Keratinocyte;Keratinocyte;Keratinocyte;Keratinocyte;Keratinocyte;Keratinocyte;Keratinocyte;Keratinocyte;Keratinocyte;Keratinocyte;Keratinocyte;Keratinocyte;Keratinocyte;Keratinocyte;Keratinocyte;Keratinocyte;Keratinocyte;Keratinocyte;Keratinocyte;Keratinocyte;Keratinocyte;Keratinocyte;Keratinocyte;Keratinocyte;Keratinocyte;Keratinoc…
chr1	44002086	44002286	Enhancer	LEPRE1;RP11;ZNF691;RP11;RP11;ATP6V1E1P1;SLC2A1;FAM183A;WDR65;EBNA1BP2;TMEM125;C1orf210;RP1;CDC20;ELOVL1;RP1;MED8;SZT2;SZT2;HYI;HYI;PTPRF;KDM4A;ST3GAL3;RP11;SHMT1P1;ARTN;RP11;IPO13;DPH2;ATP6V0B;B4GALT2;CCDC24;RP11	Keratinocyte;Keratinocyte;Keratinocyte;Keratinocyte;Keratinocyte;Keratinocyte;Keratinocyte;Keratinocyte;Keratinocyte;Keratinocyte;Keratinocyte;Keratinocyte;Keratinocyte;Keratinocyte;Keratinocyte;Keratinocyte;Keratinocyte;Keratinocyte;Keratinocyte;Keratinocyte;Keratinocyte;Keratinocyte;Keratinocyte;Keratinocyte;Keratinocyte;Keratinocyte;Keratinocyte;Keratinocyte;Keratinocyte;Keratinocyte;Keratinoc…
chr1	44003072	44003272	Enhancer	LEPRE1;RP11;ZNF691;RP11;RP11;ATP6V1E1P1;SLC2A1;FAM183A;WDR65;EBNA1BP2;TMEM125;C1orf210;RP1;CDC20;ELOVL1;RP1;MED8;SZT2;SZT2;HYI;HYI;PTPRF;KDM4A;ST3GAL3;RP11;SHMT1P1;ARTN;RP11;IPO13;DPH2;ATP6V0B;B4GALT2;CCDC24;RP11	Keratinocyte;Keratinocyte;Keratinocyte;Keratinocyte;Keratinocyte;Keratinocyte;Keratinocyte;Keratinocyte;Keratinocyte;Keratinocyte;Keratinocyte;Keratinocyte;Keratinocyte;Keratinocyte;Keratinocyte;Keratinocyte;Keratinocyte;Keratinocyte;Keratinocyte;Keratinocyte;Keratinocyte;Keratinocyte;Keratinocyte;Keratinocyte;Keratinocyte;Keratinocyte;Keratinocyte;Keratinocyte;Keratinocyte;Keratinocyte;Keratinoc…
chr1	44068690	44068890	Enhancer	ERMAP;CCDC23;ZNF691;RP11;SLC2A1;WDR65;EBNA1BP2;TMEM125;C1orf210;TIE1;RP1;CDC20;ELOVL1;RP1;MED8;SZT2;SZT2;HYI;HYI;PTPRF;KDM4A;ST3GAL3;RP11;SHMT1P1;ARTN;ATP6V0B;B4GALT2;CCDC24	Keratinocyte;Keratinocyte;Keratinocyte;Keratinocyte;Keratinocyte;Keratinocyte;Keratinocyte;Keratinocyte;Keratinocyte;Keratinocyte;Keratinocyte;Keratinocyte;Keratinocyte;Keratinocyte;Keratinocyte;Keratinocyte;Keratinocyte;Keratinocyte;Keratinocyte;Keratinocyte;Keratinocyte;Keratinocyte;Keratinocyte;Keratinocyte;Keratinocyte;Keratinocyte;Keratinocyte;Keratinocyte
chr1	44116993	44117193	Enhancer	ERMAP;CCDC23;ZNF691;RP11;RP11;EBNA1BP2;TMEM125;C1orf210;RP1;CDC20;ELOVL1;RP1;MED8;SZT2;SZT2;HYI;PTPRF;KDM4A;ST3GAL3;RP11;ARTN;IPO13;DPH2;ATP6V0B;B4GALT2	Keratinocyte;Keratinocyte;Keratinocyte;Keratinocyte;Keratinocyte;Keratinocyte;Keratinocyte;Keratinocyte;Keratinocyte;Keratinocyte;Keratinocyte;Keratinocyte;Keratinocyte;Keratinocyte;Keratinocyte;Keratinocyte;Keratinocyte;Keratinocyte;Keratinocyte;Keratinocyte;Keratinocyte;Keratinocyte;Keratinocyte;Keratinocyte;Keratinocyte
chr1	44131823	44132023	Enhancer	ERMAP;CCDC23;ZNF691;RP11;EBNA1BP2;TMEM125;C1orf210;TIE1;RP1;CDC20;ELOVL1;RP1;MED8;SZT2;SZT2;HYI;HYI;PTPRF;KDM4A;ST3GAL3;RP11;ARTN;IPO13	Keratinocyte;Keratinocyte;Keratinocyte;Keratinocyte;Keratinocyte;Keratinocyte;Keratinocyte;Keratinocyte;Keratinocyte;Keratinocyte;Keratinocyte;Keratinocyte;Keratinocyte;Keratinocyte;Keratinocyte;Keratinocyte;Keratinocyte;Keratinocyte;Keratinocyte;Keratinocyte;Keratinocyte;Keratinocyte;Keratinocyte
chr1	44287864	44288064	Enhancer	EBNA1BP2;ELOVL1;MED8;SZT2;HYI;PTPRF;KDM4A;SHMT1P1;ARTN;RP11;IPO13;DPH2;ATP6V0B;B4GALT2;CCDC24;SLC6A9;RP11;DMAP1	Keratinocyte;Keratinocyte;Keratinocyte;Keratinocyte;Keratinocyte;Keratinocyte;Keratinocyte;Keratinocyte;Keratinocyte;Keratinocyte;Keratinocyte;Keratinocyte;Keratinocyte;Keratinocyte;Keratinocyte;Keratinocyte;Keratinocyte;Keratinocyte
chr1	44324556	44324756	Enhancer	EBNA1BP2;ELOVL1;SZT2;HYI;HYI;PTPRF;KDM4A;SHMT1P1;ARTN;RP11;IPO13;DPH2;ATP6V0B;B4GALT2;CCDC24;SLC6A9;RP5;RP11;DMAP1	Keratinocyte;Keratinocyte;Keratinocyte;Keratinocyte;Keratinocyte;Keratinocyte;Keratinocyte;Keratinocyte;Keratinocyte;Keratinocyte;Keratinocyte;Keratinocyte;Keratinocyte;Keratinocyte;Keratinocyte;Keratinocyte;Keratinocyte;Keratinocyte;Keratinocyte
chr1	44326918	44327118	Enhancer	EBNA1BP2;ELOVL1;SZT2;HYI;PTPRF;KDM4A;SHMT1P1;ARTN;RP11;IPO13;DPH2;ATP6V0B;B4GALT2;CCDC24;SLC6A9;RP5;RP11;DMAP1	Keratinocyte;Keratinocyte;Keratinocyte;Keratinocyte;Keratinocyte;Keratinocyte;Keratinocyte;Keratinocyte;Keratinocyte;Keratinocyte;Keratinocyte;Keratinocyte;Keratinocyte;Keratinocyte;Keratinocyte;Keratinocyte;Keratinocyte;Keratinocyte
chr1	44350961	44351161	Enhancer	EBNA1BP2;ELOVL1;SZT2;HYI;PTPRF;KDM4A;ST3GAL3;RP11;SHMT1P1;ARTN;RP11;IPO13;DPH2;ATP6V0B;B4GALT2;CCDC24;SLC6A9;RP5	Keratinocyte;Keratinocyte;Keratinocyte;Keratinocyte;Keratinocyte;Keratinocyte;Keratinocyte;Keratinocyte;Keratinocyte;Keratinocyte;Keratinocyte;Keratinocyte;Keratinocyte;Keratinocyte;Keratinocyte;Keratinocyte;Keratinocyte;Keratinocyte
chr1	44380832	44381032	Enhancer	EBNA1BP2;ELOVL1;PTPRF;KDM4A;ST3GAL3;RP11;SHMT1P1;ARTN;RP11;IPO13;DPH2;ATP6V0B;B4GALT2;CCDC24;SLC6A9;RP5	Keratinocyte;Keratinocyte;Keratinocyte;Keratinocyte;Keratinocyte;Keratinocyte;Keratinocyte;Keratinocyte;Keratinocyte;Keratinocyte;Keratinocyte;Keratinocyte;Keratinocyte;Keratinocyte;Keratinocyte;Keratinocyte
chr1	44726910	44727110	Enhancer	SHMT1P1;DPH2;DMAP1;ERI3;TMEM53	Keratinocyte;Keratinocyte;Keratinocyte;Keratinocyte;Keratinocyte
chr1	44727137	44727337	Enhancer	SHMT1P1;DMAP1;ERI3;TMEM53	Keratinocyte;Keratinocyte;Keratinocyte;Keratinocyte
chr1	44727184	44727384	Enhancer	SHMT1P1;DMAP1;ERI3;TMEM53	Keratinocyte;Keratinocyte;Keratinocyte;Keratinocyte
chr1	44727213	44727413	Enhancer	SHMT1P1;DMAP1;ERI3;TMEM53	Keratinocyte;Keratinocyte;Keratinocyte;Keratinocyte
chr1	45082979	45083179	Enhancer	DMAP1;ERI3;RNF220;TMEM53;C1orf228;KIF2C;CCNB1IP1P1;EIF2B3;RP5;HECTD3;UROD	Keratinocyte;Keratinocyte;Keratinocyte;Keratinocyte;Keratinocyte;Keratinocyte;Keratinocyte;Keratinocyte;Keratinocyte;Keratinocyte;Keratinocyte
chr1	45083024	45083224	Enhancer	DMAP1;ERI3;RNF220;TMEM53;C1orf228;KIF2C;CCNB1IP1P1;EIF2B3;RP5;HECTD3;UROD	Keratinocyte;Keratinocyte;Keratinocyte;Keratinocyte;Keratinocyte;Keratinocyte;Keratinocyte;Keratinocyte;Keratinocyte;Keratinocyte;Keratinocyte
chr1	45083107	45083307	Enhancer	DMAP1;ERI3;RNF220;TMEM53;C1orf228;KIF2C;CCNB1IP1P1;EIF2B3;RP5;HECTD3;UROD	Keratinocyte;Keratinocyte;Keratinocyte;Keratinocyte;Keratinocyte;Keratinocyte;Keratinocyte;Keratinocyte;Keratinocyte;Keratinocyte;Keratinocyte
chr1	45083178	45083378	Enhancer	DMAP1;ERI3;RNF220;TMEM53;C1orf228;KIF2C;CCNB1IP1P1;EIF2B3;RP5;HECTD3;UROD	Keratinocyte;Keratinocyte;Keratinocyte;Keratinocyte;Keratinocyte;Keratinocyte;Keratinocyte;Keratinocyte;Keratinocyte;Keratinocyte;Keratinocyte
chr1	45347061	45347261	Enhancer	TMEM53;RP4;KIF2C;RPS8;RP11;PLK3;TCTEX1D4;BTBD19;EIF2B3	Keratinocyte;Keratinocyte;Keratinocyte;Keratinocyte;Keratinocyte;Keratinocyte;Keratinocyte;Keratinocyte;Keratinocyte
chr1	45869090	45869290	Enhancer	RP11;NASP;RP11;TMEM69;GPBP1L1;IPP;RP11;MAST2	Keratinocyte;Keratinocyte;Keratinocyte;Keratinocyte;Keratinocyte;Keratinocyte;Keratinocyte;Keratinocyte
chr1	46023169	46023369	Enhancer	MUTYH;RP11;TESK2;MMACHC;CCDC163P;PRDX1;AKR1A1;NASP;CCDC17;RP11;IPP;TMA16P2	Keratinocyte;Keratinocyte;Keratinocyte;Keratinocyte;Keratinocyte;Keratinocyte;Keratinocyte;Keratinocyte;Keratinocyte;Keratinocyte;Keratinocyte;Keratinocyte
chr1	46034165	46034365	Enhancer	TOE1;MUTYH;RP11;TESK2;MMACHC;CCDC163P;PRDX1;AKR1A1;NASP;CCDC17;RP11;IPP	Keratinocyte;Keratinocyte;Keratinocyte;Keratinocyte;Keratinocyte;Keratinocyte;Keratinocyte;Keratinocyte;Keratinocyte;Keratinocyte;Keratinocyte;Keratinocyte
chr1	46088945	46089145	Enhancer	RP11;TESK2;MMACHC;CCDC163P;PRDX1;AKR1A1;NASP;CCDC17;RP11;GPBP1L1;IPP;RP11;MAST2	Keratinocyte;Keratinocyte;Keratinocyte;Keratinocyte;Keratinocyte;Keratinocyte;Keratinocyte;Keratinocyte;Keratinocyte;Keratinocyte;Keratinocyte;Keratinocyte;Keratinocyte
chr1	46358068	46358268	Enhancer	MMACHC;PRDX1;AKR1A1;NASP;MAST2;TMA16P2	Keratinocyte;Keratinocyte;Keratinocyte;Keratinocyte;Keratinocyte;Keratinocyte
chr1	46989671	46989871	Enhancer	TSPAN1;PIK3R3;LURAP1;POMGNT1;LRRC41;UQCRH;MKNK1;MOB3C;ATPAF1;RP11;KIAA0494;CYP4B1	Keratinocyte;Keratinocyte;Keratinocyte;Keratinocyte;Keratinocyte;Keratinocyte;Keratinocyte;Keratinocyte;Keratinocyte;Keratinocyte;Keratinocyte;Keratinocyte
chr1	47077580	47077780	Enhancer	LURAP1;POMGNT1;LRRC41;UQCRH;NSUN4;RP4;DMBX1;MKNK1;MOB3C;ATPAF1;RP11;CYP4B1	Keratinocyte;Keratinocyte;Keratinocyte;Keratinocyte;Keratinocyte;Keratinocyte;Keratinocyte;Keratinocyte;Keratinocyte;Keratinocyte;Keratinocyte;Keratinocyte
chr1	47078866	47079066	Enhancer	LRRC41;UQCRH;DMBX1;MKNK1;MOB3C;RP11;KIAA0494	Keratinocyte;Keratinocyte;Keratinocyte;Keratinocyte;Keratinocyte;Keratinocyte;Keratinocyte
chr1	47222832	47223032	Enhancer	LRRC41;UQCRH;RP4;MKNK1;MOB3C;ATPAF1;RP11	Keratinocyte;Keratinocyte;Keratinocyte;Keratinocyte;Keratinocyte;Keratinocyte;Keratinocyte
chr1	47223468	47223668	Enhancer	LRRC41;UQCRH;RP4;MKNK1;MOB3C;ATPAF1;RP11	Keratinocyte;Keratinocyte;Keratinocyte;Keratinocyte;Keratinocyte;Keratinocyte;Keratinocyte
chr1	51171752	51171952	Enhancer	PHBP12	Keratinocyte
chr1	51727093	51727293	Enhancer	CFL1P2;RP11;RNF11;RP11;RP11;TTC39A;EPS15;OSBPL9;NRD1	Keratinocyte;Keratinocyte;Keratinocyte;Keratinocyte;Keratinocyte;Keratinocyte;Keratinocyte;Keratinocyte;Keratinocyte
chr1	52830798	52830998	Enhancer	ZFYVE9;ANAPC10P1;CC2D1B;PLA2G12AP1;RP4	HUVEC,Keratinocyte;HUVEC;HUVEC,Keratinocyte;HUVEC,Keratinocyte;Keratinocyte
chr1	54038448	54038648	Enhancer	CPT2;RP5;C1orf123;MAGOH	Keratinocyte;Keratinocyte;Keratinocyte;Keratinocyte
chr1	54423102	54423302	Enhancer	YIPF1;LRRC42;HSPB11;RP1;AL353898.1;AL353898.2;TMEM59;TCEANC2;RP4;AL353898.3;AL161915.1;AL357673.1;MRPL37	Keratinocyte;Keratinocyte;Keratinocyte;Keratinocyte;Keratinocyte;Keratinocyte;Keratinocyte;Keratinocyte;Keratinocyte;Keratinocyte;Keratinocyte;Keratinocyte;Keratinocyte
chr1	55932510	55932710	Enhancer	USP24;GYG1P3	Keratinocyte;Keratinocyte
chr1	59186480	59186680	Enhancer	RP4;PHBP3	Keratinocyte;Keratinocyte
chr1	59187102	59187302	Enhancer	RP4;PHBP3	Keratinocyte;Keratinocyte
chr1	59387008	59387208	Enhancer	TACSTD2;RP4;MYSM1;JUN;RP4;PHBP3	Keratinocyte;Keratinocyte;Keratinocyte;Keratinocyte;Keratinocyte;Keratinocyte
chr1	59397599	59397799	Enhancer	OMA1;TACSTD2;RP4;MYSM1;JUN;RP4	Keratinocyte;Keratinocyte;Keratinocyte;Keratinocyte;Keratinocyte;Keratinocyte
chr1	59437484	59437684	Enhancer	OMA1;TACSTD2;RP4;MYSM1;JUN;RP4;PHBP3	Keratinocyte;Keratinocyte;Keratinocyte;Keratinocyte;Keratinocyte;Keratinocyte;Keratinocyte
chr1	59573371	59573571	Enhancer	TACSTD2;RP4;JUN;RP4	Keratinocyte;Keratinocyte;Keratinocyte;Keratinocyte
chr1	59573755	59573955	Enhancer	TACSTD2;RP4;JUN;RP4	Keratinocyte;Keratinocyte;Keratinocyte;Keratinocyte
chr1	59893092	59893292	Enhancer	JUN;FGGY;HOOK1	Keratinocyte;Keratinocyte;Keratinocyte
chr1	59965903	59966103	Enhancer	PHBP3;FGGY	Keratinocyte;Keratinocyte
chr1	60139247	60139447	Enhancer	RP4;HOOK1;CYP2J2	Keratinocyte;Keratinocyte;Keratinocyte
chr1	60140563	60140763	Enhancer	RP4;HOOK1	Keratinocyte;Keratinocyte
chr1	60217512	60217712	Enhancer	RP4;HOOK1;CYP2J2	Keratinocyte;Keratinocyte;Keratinocyte
chr1	60282050	60282250	Enhancer	RP4;HOOK1;CYP2J2	Keratinocyte;Keratinocyte;Keratinocyte
chr1	60297157	60297357	Enhancer	RP4;HOOK1	Keratinocyte;Keratinocyte
chr1	61549882	61550082	Enhancer	NFIA;TM2D1;INADL	Keratinocyte;Keratinocyte;Keratinocyte
chr1	61649807	61650007	Enhancer	NFIA	Keratinocyte
chr1	61649873	61650073	Enhancer	NFIA	Keratinocyte
chr1	61692318	61692518	Enhancer	NFIA	Keratinocyte
chr1	61751205	61751405	Enhancer	NFIA	Keratinocyte
chr1	61890079	61890279	Enhancer	TM2D1;INADL	Keratinocyte;Keratinocyte
chr1	61890087	61890287	Enhancer	TM2D1;INADL	Keratinocyte;Keratinocyte
chr1	61970630	61970830	Enhancer	TM2D1;INADL	Keratinocyte;Keratinocyte
chr1	62051423	62051623	Enhancer	TM2D1;INADL	Keratinocyte;Keratinocyte
chr1	62209507	62209707	Enhancer	TM2D1;INADL	Keratinocyte;Keratinocyte
chr1	62458829	62459029	Enhancer	TM2D1;INADL;HBXIPP1;USP1	Keratinocyte;Keratinocyte;Keratinocyte;Keratinocyte
chr1	62775508	62775708	Enhancer	HBXIPP1;KANK4;DOCK7	Keratinocyte;Keratinocyte;Keratinocyte
chr1	63250624	63250824	Enhancer	USP1;RP5;ATG4C	Keratinocyte;Keratinocyte;Keratinocyte
chr1	64127651	64127851	Enhancer	AL049636.1;ALG6;EFCAB7;DLEU2L;PGM1;ITGB3BP;AL109925.1;CFL1P3	Keratinocyte;Keratinocyte;Keratinocyte;Keratinocyte;Keratinocyte;Keratinocyte;Keratinocyte;Keratinocyte
chr1	64313156	64313356	Enhancer	EFCAB7;DLEU2L;PGM1;AL109925.1;ROR1;RP4;CFL1P3	Keratinocyte;Keratinocyte;Keratinocyte;Keratinocyte;Keratinocyte;Keratinocyte;Keratinocyte
chr1	65211577	65211777	Enhancer	RAVER2;AK4	Keratinocyte;Keratinocyte
chr1	65386700	65386900	Enhancer	JAK1;RP11;RP11;AK4	Keratinocyte;Keratinocyte;Keratinocyte;Keratinocyte
chr1	65414109	65414309	Enhancer	JAK1;RP11;RP11;AK4	Keratinocyte;Keratinocyte;Keratinocyte;Keratinocyte
chr1	65448913	65449113	Enhancer	JAK1;RP11;RP11	Keratinocyte;Keratinocyte;Keratinocyte
chr1	65448947	65449147	Enhancer	JAK1;RP11;RP11	Keratinocyte;Keratinocyte;Keratinocyte
chr1	65455123	65455323	Enhancer	JAK1;RP11	Keratinocyte;Keratinocyte
chr1	65636228	65636428	Enhancer	JAK1;RP11;AK4;DNAJC6	Keratinocyte;Keratinocyte;Keratinocyte;Keratinocyte
chr1	65888443	65888643	Enhancer	AK4;DNAJC6;LEPR;LEPROT;RP4;RP11	Keratinocyte;Keratinocyte;Keratinocyte;Keratinocyte;Keratinocyte;Keratinocyte
chr1	67041515	67041715	Enhancer	SGIP1	Keratinocyte
chr1	67692871	67693071	Enhancer	MIER1;RP4;SERBP1;GADD45A;GNG12	Keratinocyte;Keratinocyte;Keratinocyte;Keratinocyte;Keratinocyte
chr1	67841941	67842141	Enhancer	SERBP1;GNG12	Keratinocyte;Keratinocyte
chr1	67929247	67929447	Enhancer	SLC35D1;RP4;IL12RB2;SERBP1;RP11;GNG12	Keratinocyte;Keratinocyte;Keratinocyte;Keratinocyte;Keratinocyte;Keratinocyte
chr1	67929307	67929507	Enhancer	SLC35D1;RP4;IL12RB2;SERBP1;RP11;GNG12	Keratinocyte;Keratinocyte;Keratinocyte;Keratinocyte;Keratinocyte;Keratinocyte
chr1	68041286	68041486	Enhancer	RP4;RP11;GNG12;RP11	Keratinocyte;Keratinocyte;Keratinocyte;Keratinocyte
chr1	68182370	68182570	Enhancer	RP4;SERBP1;GADD45A;RP11;GNG12;RP4;DIRAS3;RP11;RPS7P4	Keratinocyte;Keratinocyte;Keratinocyte;Keratinocyte;Keratinocyte;Keratinocyte;Keratinocyte;Keratinocyte;Keratinocyte
chr1	68204178	68204378	Enhancer	RP4;IL12RB2;SERBP1;GADD45A;RP11;GNG12;RP4;RP11;RPS7P4	Keratinocyte;Keratinocyte;Keratinocyte;Keratinocyte;Keratinocyte;Keratinocyte;Keratinocyte;Keratinocyte;Keratinocyte
chr1	68257795	68257995	Enhancer	RP4;SERBP1;GADD45A;RP11;GNG12;RP11;RPS7P4	Keratinocyte;Keratinocyte;Keratinocyte;Keratinocyte;Keratinocyte;Keratinocyte;Keratinocyte
chr1	68279923	68280123	Enhancer	RP4;SERBP1;GADD45A;RP11;GNG12;DIRAS3;RP11;WLS;RPS7P4	Keratinocyte;Keratinocyte;Keratinocyte;Keratinocyte;Keratinocyte;Keratinocyte;Keratinocyte;Keratinocyte;Keratinocyte
chr1	68281648	68281848	Enhancer	RP4;SERBP1;GADD45A;RP11;GNG12;RP4;RP11;WLS;RPS7P4	Keratinocyte;Keratinocyte;Keratinocyte;Keratinocyte;Keratinocyte;Keratinocyte;Keratinocyte;Keratinocyte;Keratinocyte
chr1	68684232	68684432	Enhancer	GADD45A;GNG12;RP11;WLS;RPS7P4;TCEB1P18	Keratinocyte;Keratinocyte;Keratinocyte;Keratinocyte;Keratinocyte;Keratinocyte
chr1	68844425	68844625	Enhancer	RP11	Keratinocyte
chr1	77464462	77464662	Enhancer	RP4;RP4	Keratinocyte;Keratinocyte
chr1	82147324	82147524	Enhancer	RP5;RP5;ST13P20	Keratinocyte;Keratinocyte;Keratinocyte
chr1	85299995	85300195	Enhancer	RPF1;GNG5;SSX2IP;LPAR3	Keratinocyte;Keratinocyte;Keratinocyte;Keratinocyte
chr1	85665344	85665544	Enhancer	LPAR3;SYDE2;C1orf52;CYR61	Keratinocyte;Keratinocyte;Keratinocyte;Keratinocyte
chr1	86022143	86022343	Enhancer	DDAH1;CYR61;ZNHIT6	Keratinocyte;Keratinocyte;Keratinocyte
chr1	86038883	86039083	Enhancer	C1orf52;DDAH1;CYR61;ZNHIT6	Keratinocyte;Keratinocyte;Keratinocyte;Keratinocyte
chr1	87083095	87083295	Enhancer	ODF2L;CLCA2;CLCA3P;RP4;RP4;HS2ST1;RP11;RP11	Keratinocyte;Keratinocyte;Keratinocyte;Keratinocyte;Keratinocyte;Keratinocyte;Keratinocyte;Keratinocyte
chr1	87244552	87244752	Enhancer	ODF2L;CLCA2;CLCA4;CLCA3P;RP4;RP4;SH3GLB1;RP4;RP4;HS2ST1;RP4;RP11;RP11	Keratinocyte;Keratinocyte;Keratinocyte;Keratinocyte;Keratinocyte;Keratinocyte;Keratinocyte;Keratinocyte;Keratinocyte;Keratinocyte;Keratinocyte;Keratinocyte;Keratinocyte
chr1	87258535	87258735	Enhancer	ODF2L;CLCA2;CLCA4;CLCA3P;RP4;RP4;SH3GLB1;RP4;RP11;RP11	Keratinocyte;Keratinocyte;Keratinocyte;Keratinocyte;Keratinocyte;Keratinocyte;Keratinocyte;Keratinocyte;Keratinocyte;Keratinocyte
chr1	87864982	87865182	Enhancer	RP11;RP11;LMO4	Keratinocyte;Keratinocyte;Keratinocyte
chr1	89113028	89113228	Enhancer	TCEB1P19;GTF2B;CCBL2;RBMXL1;GBP3	Keratinocyte;Keratinocyte;Keratinocyte;Keratinocyte;Keratinocyte
chr1	90032291	90032491	Enhancer	RP4;LRRC8B;ZNF326;GEMIN8P4	Keratinocyte;Keratinocyte;Keratinocyte;Keratinocyte
chr1	90032548	90032748	Enhancer	RP4;LRRC8B;ZNF326;GEMIN8P4	Keratinocyte;Keratinocyte;Keratinocyte;Keratinocyte
chr1	90032555	90032755	Enhancer	RP4;LRRC8B;ZNF326;GEMIN8P4	Keratinocyte;Keratinocyte;Keratinocyte;Keratinocyte
chr1	90274259	90274459	Enhancer	LRRC8C;RP5;LRRC8D;ZNF326;GEMIN8P4	Keratinocyte;Keratinocyte;Keratinocyte;Keratinocyte;Keratinocyte
chr1	90274307	90274507	Enhancer	LRRC8C;RP5;LRRC8D;ZNF326;GEMIN8P4	Keratinocyte;Keratinocyte;Keratinocyte;Keratinocyte;Keratinocyte
chr1	90331129	90331329	Enhancer	RP5;LRRC8C;RP5;LRRC8D;ZNF326;GEMIN8P4	Keratinocyte;Keratinocyte;Keratinocyte;Keratinocyte;Keratinocyte;Keratinocyte
chr1	92202571	92202771	Enhancer	FEN1P1;HSP90B3P;SETP18;PRKAR1AP	Keratinocyte;Keratinocyte;Keratinocyte;Keratinocyte
chr1	92210588	92210788	Enhancer	CDC7;RP11;HSP90B3P;SETP18;GAPDHP46;PRKAR1AP	Keratinocyte;Keratinocyte;Keratinocyte;Keratinocyte;Keratinocyte;Keratinocyte
chr1	92292715	92292915	Enhancer	CDC7;RP11;HSP90B3P;SETP18;PRKAR1AP	Keratinocyte;Keratinocyte;Keratinocyte;Keratinocyte;Keratinocyte
chr1	92293399	92293599	Enhancer	CDC7;RP11;HSP90B3P;SETP18;PRKAR1AP	Keratinocyte;Keratinocyte;Keratinocyte;Keratinocyte;Keratinocyte
chr1	92329299	92329499	Enhancer	CDC7;RP11;HSP90B3P;TGFBR3	Keratinocyte;Keratinocyte;Keratinocyte;Keratinocyte
chr1	93270170	93270370	Enhancer	RP11;RPL5;FAM69A;MTF2;TMED5;RP4	Keratinocyte;Keratinocyte;Keratinocyte;Keratinocyte;Keratinocyte;Keratinocyte
chr1	93317464	93317664	Enhancer	EVI5;RPL5;FAM69A;TMED5;RP4	Keratinocyte;Keratinocyte;Keratinocyte;Keratinocyte;Keratinocyte
chr1	93374879	93375079	Enhancer	RP11;CCNJP2;EVI5;RPL5;FAM69A;MTF2;TMED5;RP4;RP4	Keratinocyte;Keratinocyte;Keratinocyte;Keratinocyte;Keratinocyte;Keratinocyte;Keratinocyte;Keratinocyte;Keratinocyte
chr1	93399112	93399312	Enhancer	CCNJP2;EVI5;RPL5;FAM69A;MTF2;TMED5;RP4;RP4;DR1;RP4	Keratinocyte;Keratinocyte;Keratinocyte;Keratinocyte;Keratinocyte;Keratinocyte;Keratinocyte;Keratinocyte;Keratinocyte;Keratinocyte
chr1	93400365	93400565	Enhancer	RP11;CCNJP2;EVI5;RPL5;FAM69A;MTF2;DR1;RP4	Keratinocyte;Keratinocyte;Keratinocyte;Keratinocyte;Keratinocyte;Keratinocyte;Keratinocyte;Keratinocyte
chr1	93804909	93805109	Enhancer	RPL5;SNORD21;SNORA66;MTF2;CCDC18;TMED5;RP4;DR1;RP4;RP4;FNBP1L;RP5	HUVEC;HUVEC;HUVEC;HUVEC;HUVEC;HUVEC;HUVEC;HUVEC;HUVEC;HUVEC;HUVEC;HUVEC
chr1	94050173	94050373	Enhancer	TMED5;RP4;RP4;DR1;RP4;RP4;FNBP1L;RP5;RP11;BCAR3;DNTTIP2;GCLM	Keratinocyte;Keratinocyte;Keratinocyte;Keratinocyte;Keratinocyte;Keratinocyte;Keratinocyte;Keratinocyte;Keratinocyte;Keratinocyte;Keratinocyte;Keratinocyte
chr1	94050604	94050804	Enhancer	TMED5;RP4;RP4;DR1;RP4;RP4;FNBP1L;RP5;RP11;BCAR3;DNTTIP2;GCLM	Keratinocyte;Keratinocyte;Keratinocyte;Keratinocyte;Keratinocyte;Keratinocyte;Keratinocyte;Keratinocyte;Keratinocyte;Keratinocyte;Keratinocyte;Keratinocyte
chr1	94050646	94050846	Enhancer	TMED5;RP4;RP4;DR1;RP4;RP4;FNBP1L;RP5;RP11;BCAR3;DNTTIP2;GCLM	Keratinocyte;Keratinocyte;Keratinocyte;Keratinocyte;Keratinocyte;Keratinocyte;Keratinocyte;Keratinocyte;Keratinocyte;Keratinocyte;Keratinocyte;Keratinocyte
chr1	94050687	94050887	Enhancer	TMED5;RP4;RP4;DR1;RP4;RP4;FNBP1L;RP5;RP11;BCAR3;DNTTIP2;GCLM	Keratinocyte;Keratinocyte;Keratinocyte;Keratinocyte;Keratinocyte;Keratinocyte;Keratinocyte;Keratinocyte;Keratinocyte;Keratinocyte;Keratinocyte;Keratinocyte
chr1	94050803	94051003	Enhancer	TMED5;RP4;RP4;DR1;RP4;RP4;FNBP1L;RP5;RP11;BCAR3;DNTTIP2;GCLM	Keratinocyte;Keratinocyte;Keratinocyte;Keratinocyte;Keratinocyte;Keratinocyte;Keratinocyte;Keratinocyte;Keratinocyte;Keratinocyte;Keratinocyte;Keratinocyte
chr1	94051006	94051206	Enhancer	TMED5;RP4;RP4;DR1;RP4;RP4;FNBP1L;RP5;RP11;BCAR3;DNTTIP2;GCLM	Keratinocyte;Keratinocyte;Keratinocyte;Keratinocyte;Keratinocyte;Keratinocyte;Keratinocyte;Keratinocyte;Keratinocyte;Keratinocyte;Keratinocyte;Keratinocyte
chr1	94132223	94132423	Enhancer	RP4;DR1;RP4;RP4;FNBP1L;RP5;RP11;BCAR3;DNTTIP2;GCLM	Keratinocyte;Keratinocyte;Keratinocyte;Keratinocyte;Keratinocyte;Keratinocyte;Keratinocyte;Keratinocyte;Keratinocyte;Keratinocyte
chr1	94135979	94136179	Enhancer	RP4;DR1;RP4;RP4;FNBP1L;RP5;RP11;BCAR3;DNTTIP2;GCLM	Keratinocyte;Keratinocyte;Keratinocyte;Keratinocyte;Keratinocyte;Keratinocyte;Keratinocyte;Keratinocyte;Keratinocyte;Keratinocyte
chr1	94240579	94240779	Enhancer	RP4;DR1;RP4;RP4;FNBP1L;RP5;BCAR3;RP4;DNTTIP2;GCLM;ABCA4	Keratinocyte;Keratinocyte;Keratinocyte;Keratinocyte;Keratinocyte;Keratinocyte;Keratinocyte;Keratinocyte;Keratinocyte;Keratinocyte;Keratinocyte
chr1	94547259	94547459	Enhancer	RP11;DNTTIP2;ARHGAP29;ABCD3;F3	Keratinocyte;Keratinocyte;Keratinocyte;Keratinocyte;Keratinocyte
chr1	94566469	94566669	Enhancer	RP11;BCAR3;DNTTIP2;ABCA4;ARHGAP29;ABCD3;F3	Keratinocyte;Keratinocyte;Keratinocyte;Keratinocyte;Keratinocyte;Keratinocyte;Keratinocyte
chr1	94567239	94567439	Enhancer	RP11;BCAR3;DNTTIP2;ABCA4;ARHGAP29;ABCD3;F3	Keratinocyte;Keratinocyte;Keratinocyte;Keratinocyte;Keratinocyte;Keratinocyte;Keratinocyte
chr1	94888088	94888288	Enhancer	DNTTIP2;ABCA4;ARHGAP29;RP11;ABCD3;F3;RP11;RP11;SLC44A3	Keratinocyte;Keratinocyte;Keratinocyte;Keratinocyte;Keratinocyte;Keratinocyte;Keratinocyte;Keratinocyte;Keratinocyte
chr1	95006222	95006422	Enhancer	DNTTIP2;ABCA4;ARHGAP29;RP11;ABCD3;F3;RP11;RP11;RP11;SLC44A3;RP11;CNN3;RP4	Keratinocyte;Keratinocyte;Keratinocyte;Keratinocyte;Keratinocyte;Keratinocyte;Keratinocyte;Keratinocyte;Keratinocyte;Keratinocyte;Keratinocyte;Keratinocyte;Keratinocyte
chr1	95006439	95006639	Enhancer	DNTTIP2;ABCA4;ARHGAP29;RP11;ABCD3;F3;RP11;RP11;RP11;SLC44A3;RP11;CNN3;RP4	Keratinocyte;Keratinocyte;Keratinocyte;Keratinocyte;Keratinocyte;Keratinocyte;Keratinocyte;Keratinocyte;Keratinocyte;Keratinocyte;Keratinocyte;Keratinocyte;Keratinocyte
chr1	95113815	95114015	Enhancer	ARHGAP29;ABCD3;F3;RP11;RP11	Keratinocyte;Keratinocyte;Keratinocyte;Keratinocyte;Keratinocyte
chr1	95192922	95193122	Enhancer	ARHGAP29;ABCD3;F3;CNN3	Keratinocyte;Keratinocyte;Keratinocyte;Keratinocyte
chr1	95339132	95339332	Enhancer	ABCD3;F3;RP11;CNN3;RP4;RWDD3	Keratinocyte;Keratinocyte;Keratinocyte;Keratinocyte;Keratinocyte;Keratinocyte
chr1	95417130	95417330	Enhancer	F3;RP11;CNN3;RP4;RWDD3	Keratinocyte;Keratinocyte;Keratinocyte;Keratinocyte;Keratinocyte
chr1	95537746	95537946	Enhancer	F3;ALG14	Keratinocyte;Keratinocyte
chr1	98069617	98069817	Enhancer	SEC63P1	HUVEC
chr1	99923070	99923270	Enhancer	AGL	Keratinocyte
chr1	100031462	100031662	Enhancer	SLC35A3	Keratinocyte
chr1	100515742	100515942	Enhancer	FRRS1;SLC35A3;RP5;RP4;HIAT1	Keratinocyte;Keratinocyte;Keratinocyte;Keratinocyte;Keratinocyte
chr1	108186519	108186719	Enhancer	RP11	Keratinocyte
chr1	108220536	108220736	Enhancer	RP11;VAV3	Keratinocyte;Keratinocyte
chr1	108225317	108225517	Enhancer	RP11;VAV3	Keratinocyte;Keratinocyte
chr1	108534575	108534775	Enhancer	RP11	Keratinocyte
chr1	108588097	108588297	Enhancer	RP11;RP11;SLC25A24	Keratinocyte;Keratinocyte;Keratinocyte
chr1	108588466	108588666	Enhancer	RP11;RP11;SLC25A24	Keratinocyte;Keratinocyte;Keratinocyte
chr1	108613496	108613696	Enhancer	RP11;RP11;SLC25A24	Keratinocyte;Keratinocyte;Keratinocyte
chr1	109421397	109421597	Enhancer	HENMT1;PRPF38B;RP11;GPSM2;AKNAD1;CLCC1;RP11;RP11;WDR47;RANP5;TAF13;TMEM167B;SCARNA2;RP5;KIAA1324;C1orf194;SARS;CELSR2;PSRC1;MYBPHL;PSMA5	Keratinocyte;Keratinocyte;Keratinocyte;Keratinocyte;Keratinocyte;Keratinocyte;Keratinocyte;Keratinocyte;Keratinocyte;Keratinocyte;Keratinocyte;Keratinocyte;Keratinocyte;Keratinocyte;Keratinocyte;Keratinocyte;Keratinocyte;Keratinocyte;Keratinocyte;Keratinocyte;Keratinocyte
chr1	109432311	109432511	Enhancer	RP5;HENMT1;PRPF38B;FNDC7;STXBP3;RP11;RP11;GPSM2;AKNAD1;CLCC1;RP11;RP11;WDR47;RANP5;TAF13;TMEM167B;SCARNA2;RP5;KIAA1324;C1orf194;SARS;CELSR2;PSRC1;MYBPHL;PSMA5;GNAI3	Keratinocyte;Keratinocyte;Keratinocyte;Keratinocyte;Keratinocyte;Keratinocyte;Keratinocyte;Keratinocyte;Keratinocyte;Keratinocyte;Keratinocyte;Keratinocyte;Keratinocyte;Keratinocyte;Keratinocyte;Keratinocyte;Keratinocyte;Keratinocyte;Keratinocyte;Keratinocyte;Keratinocyte;Keratinocyte;Keratinocyte;Keratinocyte;Keratinocyte;Keratinocyte
chr1	109455781	109455981	Enhancer	GPSM2;AKNAD1;CLCC1;RP5;RP11;RP11;WDR47;TAF13;TMEM167B;SCARNA2;SARS;CELSR2;PSRC1	HUVEC;HUVEC;HUVEC;HUVEC;HUVEC;HUVEC;HUVEC;HUVEC;HUVEC;HUVEC;HUVEC;HUVEC;HUVEC
chr1	109490878	109491078	Enhancer	STXBP3;RP11;GPSM2;AKNAD1;CLCC1;RP11;RP11;WDR47;RANP5;TAF13;TMEM167B;SCARNA2;RP5;KIAA1324;PSRC1	HUVEC;HUVEC;HUVEC;HUVEC;HUVEC;HUVEC;HUVEC;HUVEC;HUVEC;HUVEC;HUVEC;HUVEC;HUVEC;HUVEC;HUVEC
chr1	109504979	109505179	Enhancer	PRPF38B;STXBP3;RP11;RP11;GPSM2;AKNAD1;CLCC1;RP11;RP11;WDR47;RANP5;TAF13;TMEM167B;SCARNA2;RP5;KIAA1324;C1orf194;SARS;CELSR2;PSRC1;MYBPHL;PSMA5;GNAI3;RP5	Keratinocyte;Keratinocyte;Keratinocyte;Keratinocyte;Keratinocyte;Keratinocyte;Keratinocyte;Keratinocyte;Keratinocyte;Keratinocyte;Keratinocyte;Keratinocyte;Keratinocyte;Keratinocyte;Keratinocyte;Keratinocyte;Keratinocyte;Keratinocyte;Keratinocyte;Keratinocyte;Keratinocyte;Keratinocyte;Keratinocyte;Keratinocyte
chr1	109582845	109583045	Enhancer	PRPF38B;STXBP3;RP11;GPSM2;CLCC1;RP11;RP11;WDR47;RANP5;TAF13;TMEM167B;SCARNA2;RP5;KIAA1324;C1orf194;SARS;CELSR2;PSRC1;MYBPHL;PSMA5;ATXN7L2;GNAI3	Keratinocyte;Keratinocyte;Keratinocyte;Keratinocyte;Keratinocyte;Keratinocyte;Keratinocyte;Keratinocyte;Keratinocyte;Keratinocyte;Keratinocyte;Keratinocyte;Keratinocyte;Keratinocyte;Keratinocyte;Keratinocyte;Keratinocyte;Keratinocyte;Keratinocyte;Keratinocyte;Keratinocyte;Keratinocyte
chr1	109805484	109805684	Enhancer	PRPF38B;GPSM2;AKNAD1;CLCC1;RP11;RP11;WDR47;TAF13;TMEM167B;SCARNA2;RP5;SARS;CELSR2;PSRC1;PSMA5;GNAT2	Keratinocyte;Keratinocyte;Keratinocyte;Keratinocyte;Keratinocyte;Keratinocyte;Keratinocyte;Keratinocyte;Keratinocyte;Keratinocyte;Keratinocyte;Keratinocyte;Keratinocyte;Keratinocyte;Keratinocyte;Keratinocyte
chr1	110113204	110113404	Enhancer	CLCC1;RP11;TAF13;SARS;CELSR2;SORT1;PSMA5;ATXN7L2;CYB561D1;AMIGO1;GPR61;GNAI3;RP5;GNAT2;AMPD2;RP5	Keratinocyte;Keratinocyte;Keratinocyte;Keratinocyte;Keratinocyte;Keratinocyte;Keratinocyte;Keratinocyte;Keratinocyte;Keratinocyte;Keratinocyte;Keratinocyte;Keratinocyte;Keratinocyte;Keratinocyte;Keratinocyte
chr1	110326185	110326385	Enhancer	PSMA5;CYB561D1;GNAI3;AC000032.2;GSTM3;RP4;RP4	Keratinocyte;Keratinocyte;Keratinocyte;Keratinocyte;Keratinocyte;Keratinocyte;Keratinocyte
chr1	110578159	110578359	Enhancer	GSTM1;GSTM3;CSF1;AHCYL1;FAM40A;RP4;RP4;ALX3;RBM15	Keratinocyte;Keratinocyte;Keratinocyte;Keratinocyte;Keratinocyte;Keratinocyte;Keratinocyte;Keratinocyte;Keratinocyte
chr1	110599579	110599779	Enhancer	GSTM4;GSTM2;GSTM1;GSTM3;CSF1;AHCYL1;FAM40A;RP4;RP4;ALX3;RBM15	Keratinocyte;Keratinocyte;Keratinocyte;Keratinocyte;Keratinocyte;Keratinocyte;Keratinocyte;Keratinocyte;Keratinocyte;Keratinocyte;Keratinocyte
chr1	110772402	110772602	Enhancer	AHCYL1;KCNC4;RBM15	Keratinocyte;Keratinocyte;Keratinocyte
chr1	112084384	112084584	Enhancer	CEPT1;RP11;RP11;ATP5F1;RP5;RP4;FAM212B	Keratinocyte;Keratinocyte;Keratinocyte;Keratinocyte;Keratinocyte;Keratinocyte;Keratinocyte
chr1	112084713	112084913	Enhancer	CEPT1;RP11;RP11;ATP5F1;RP5;RP4;FAM212B	Keratinocyte;Keratinocyte;Keratinocyte;Keratinocyte;Keratinocyte;Keratinocyte;Keratinocyte
chr1	113059816	113060016	Enhancer	RP5;CTTNBP2NL;RP4;ST7L;MRPL53P1;MOV10;RP11;RHOC;PPM1J;FAM19A3;RP11;RP3;RP11;AKR7A2P1;RP11;SLC16A1	Keratinocyte;Keratinocyte;Keratinocyte;Keratinocyte;Keratinocyte;Keratinocyte;Keratinocyte;Keratinocyte;Keratinocyte;Keratinocyte;Keratinocyte;Keratinocyte;Keratinocyte;Keratinocyte;Keratinocyte;Keratinocyte
chr1	113230074	113230274	Enhancer	CTTNBP2NL;WNT2B;CAPZA1;ST7L;MRPL53P1;MOV10;RP11;RHOC;PPM1J;FAM19A3;RP11;RP3;AKR7A2P1;RP11;SLC16A1;RP11;LRIG2;RP11	Keratinocyte;Keratinocyte;Keratinocyte;Keratinocyte;Keratinocyte;Keratinocyte;Keratinocyte;Keratinocyte;Keratinocyte;Keratinocyte;Keratinocyte;Keratinocyte;Keratinocyte;Keratinocyte;Keratinocyte;Keratinocyte;Keratinocyte;Keratinocyte
chr1	113230280	113230480	Enhancer	CTTNBP2NL;WNT2B;CAPZA1;ST7L;MRPL53P1;MOV10;RP11;RHOC;PPM1J;FAM19A3;RP11;RP3;AKR7A2P1;RP11;SLC16A1;RP11;LRIG2;RP11	Keratinocyte;Keratinocyte;Keratinocyte;Keratinocyte;Keratinocyte;Keratinocyte;Keratinocyte;Keratinocyte;Keratinocyte;Keratinocyte;Keratinocyte;Keratinocyte;Keratinocyte;Keratinocyte;Keratinocyte;Keratinocyte;Keratinocyte;Keratinocyte
chr1	113241947	113242147	Enhancer	CTTNBP2NL;WNT2B;CAPZA1;ST7L;MRPL53P1;MOV10;RP11;RHOC;PPM1J;FAM19A3;RP11;RP3;RP11;AKR7A2P1;RP11;SLC16A1;RP11;RP11;LRIG2;RLIMP2;RP11	Keratinocyte;Keratinocyte;Keratinocyte;Keratinocyte;Keratinocyte;Keratinocyte;Keratinocyte;Keratinocyte;Keratinocyte;Keratinocyte;Keratinocyte;Keratinocyte;Keratinocyte;Keratinocyte;Keratinocyte;Keratinocyte;Keratinocyte;Keratinocyte;Keratinocyte;Keratinocyte;Keratinocyte
chr1	113275301	113275501	Enhancer	RP5;RP5;CTTNBP2NL;WNT2B;CAPZA1;ST7L;MRPL53P1;MOV10;RP11;RHOC;FAM19A3;RP11;AKR7A2P1;RP11;SLC16A1;RP11;LRIG2;RP11	Keratinocyte;Keratinocyte;Keratinocyte;Keratinocyte;Keratinocyte;Keratinocyte;Keratinocyte;Keratinocyte;Keratinocyte;Keratinocyte;Keratinocyte;Keratinocyte;Keratinocyte;Keratinocyte;Keratinocyte;Keratinocyte;Keratinocyte;Keratinocyte
chr1	113305209	113305409	Enhancer	RP5;RP5;CTTNBP2NL;RP4;WNT2B;CAPZA1;ST7L;MRPL53P1;MOV10;RP11;RHOC;PPM1J;FAM19A3;RP11;AKR7A2P1;RP11;SLC16A1;LRIG2	Keratinocyte;Keratinocyte;Keratinocyte;Keratinocyte;Keratinocyte;Keratinocyte;Keratinocyte;Keratinocyte;Keratinocyte;Keratinocyte;Keratinocyte;Keratinocyte;Keratinocyte;Keratinocyte;Keratinocyte;Keratinocyte;Keratinocyte;Keratinocyte
chr1	113479741	113479941	Enhancer	CTTNBP2NL;CAPZA1;ST7L;MRPL53P1;MOV10;RP11;RHOC;PPM1J;FAM19A3;RP11;RP3;RP11;AKR7A2P1;RP11;SLC16A1;RP11;RP11	Keratinocyte;Keratinocyte;Keratinocyte;Keratinocyte;Keratinocyte;Keratinocyte;Keratinocyte;Keratinocyte;Keratinocyte;Keratinocyte;Keratinocyte;Keratinocyte;Keratinocyte;Keratinocyte;Keratinocyte;Keratinocyte;Keratinocyte
chr1	113479750	113479950	Enhancer	CTTNBP2NL;CAPZA1;ST7L;MRPL53P1;MOV10;RP11;RHOC;PPM1J;FAM19A3;RP11;RP3;RP11;AKR7A2P1;RP11;SLC16A1;RP11;RP11	Keratinocyte;Keratinocyte;Keratinocyte;Keratinocyte;Keratinocyte;Keratinocyte;Keratinocyte;Keratinocyte;Keratinocyte;Keratinocyte;Keratinocyte;Keratinocyte;Keratinocyte;Keratinocyte;Keratinocyte;Keratinocyte;Keratinocyte
chr1	113564505	113564705	Enhancer	CTTNBP2NL;CAPZA1;ST7L;MRPL53P1;MOV10;RP11;RHOC;PPM1J;RP11;RP3;RP11;AKR7A2P1;RP11;RP11;RP11	Keratinocyte;Keratinocyte;Keratinocyte;Keratinocyte;Keratinocyte;Keratinocyte;Keratinocyte;Keratinocyte;Keratinocyte;Keratinocyte;Keratinocyte;Keratinocyte;Keratinocyte;Keratinocyte;Keratinocyte
chr1	113577927	113578127	Enhancer	CTTNBP2NL;CAPZA1;ST7L;MRPL53P1;MOV10;RP11;RHOC;PPM1J;RP11;RP3;RP11;AKR7A2P1;RP11;RP11;RP11;LRIG2;RP11	Keratinocyte;Keratinocyte;Keratinocyte;Keratinocyte;Keratinocyte;Keratinocyte;Keratinocyte;Keratinocyte;Keratinocyte;Keratinocyte;Keratinocyte;Keratinocyte;Keratinocyte;Keratinocyte;Keratinocyte;Keratinocyte;Keratinocyte
chr1	113798005	113798205	Enhancer	CAPZA1;RHOC;AKR7A2P1;RP11;SLC16A1;RP11;RP11	Keratinocyte;Keratinocyte;Keratinocyte;Keratinocyte;Keratinocyte;Keratinocyte;Keratinocyte
chr1	113798021	113798221	Enhancer	CAPZA1;RHOC;AKR7A2P1;RP11;SLC16A1;RP11;RP11	Keratinocyte;Keratinocyte;Keratinocyte;Keratinocyte;Keratinocyte;Keratinocyte;Keratinocyte
chr1	113999978	114000178	Enhancer	LRIG2;RP11;RP11	Keratinocyte;Keratinocyte;Keratinocyte
chr1	115153330	115153530	Enhancer	RP4;EIF2S2P5;TRIM33;RP11;BCAS2	Keratinocyte;Keratinocyte;Keratinocyte;Keratinocyte;Keratinocyte
chr1	115842540	115842740	Enhancer	NGF;RP11;VANGL1	Keratinocyte;Keratinocyte;Keratinocyte
chr1	115843278	115843478	Enhancer	NGF;RP11;VANGL1	Keratinocyte;Keratinocyte;Keratinocyte
chr1	116219379	116219579	Enhancer	VANGL1;RP11;SLC22A15	Keratinocyte;Keratinocyte;Keratinocyte
chr1	116219569	116219769	Enhancer	VANGL1;RP11;SLC22A15	Keratinocyte;Keratinocyte;Keratinocyte
chr1	116371702	116371902	Enhancer	RP11;VANGL1;RP11;SLC22A15;RP11;ATP1A1;ATP1A1OS	Keratinocyte;Keratinocyte;Keratinocyte;Keratinocyte;Keratinocyte;Keratinocyte;Keratinocyte
chr1	116371771	116371971	Enhancer	RP11;VANGL1;RP11;SLC22A15;RP11;ATP1A1;ATP1A1OS	Keratinocyte;Keratinocyte;Keratinocyte;Keratinocyte;Keratinocyte;Keratinocyte;Keratinocyte
chr1	116373787	116373987	Enhancer	RP11;VANGL1;NHLH2;RP11;RP11;ATP1A1;ATP1A1OS	Keratinocyte;Keratinocyte;Keratinocyte;Keratinocyte;Keratinocyte;Keratinocyte;Keratinocyte
chr1	116809620	116809820	Enhancer	SLC22A15;ATP1A1OS;NAP1L4P1;CD58;IGSF3;GAPDHP64;PTGFRN	Keratinocyte;Keratinocyte;Keratinocyte;Keratinocyte;Keratinocyte;Keratinocyte;Keratinocyte
chr1	116833011	116833211	Enhancer	ATP1A1OS;RP4;NAP1L4P1;IGSF3;GAPDHP64;PTGFRN	Keratinocyte;Keratinocyte;Keratinocyte;Keratinocyte;Keratinocyte;Keratinocyte
chr1	116930679	116930879	Enhancer	SLC22A15;ATP1A1;ATP1A1OS;NAP1L4P1;CD58;IGSF3;GAPDHP64;PTGFRN	Keratinocyte;Keratinocyte;Keratinocyte;Keratinocyte;Keratinocyte;Keratinocyte;Keratinocyte;Keratinocyte
chr1	116930775	116930975	Enhancer	SLC22A15;ATP1A1;ATP1A1OS;NAP1L4P1;CD58;IGSF3;GAPDHP64;PTGFRN	Keratinocyte;Keratinocyte;Keratinocyte;Keratinocyte;Keratinocyte;Keratinocyte;Keratinocyte;Keratinocyte
chr1	117044122	117044322	Enhancer	ATP1A1;NAP1L4P1;CD58;IGSF3;GAPDHP64;PTGFRN;TRIM45	Keratinocyte;Keratinocyte;Keratinocyte;Keratinocyte;Keratinocyte;Keratinocyte;Keratinocyte
chr1	117251276	117251476	Enhancer	ATP1A1;ATP1A1OS;RP5;NAP1L4P1;IGSF3;C1orf137;GAPDHP64;NEFHP1;PTGFRN;CD101;TTF2;TRIM45	Keratinocyte;Keratinocyte;Keratinocyte;Keratinocyte;Keratinocyte;Keratinocyte;Keratinocyte;Keratinocyte;Keratinocyte;Keratinocyte;Keratinocyte;Keratinocyte
chr1	117363175	117363375	Enhancer	ATP1A1;ATP1A1OS;NAP1L4P1;IGSF3;CD101;RP11;TTF2;TRIM45	Keratinocyte;Keratinocyte;Keratinocyte;Keratinocyte;Keratinocyte;Keratinocyte;Keratinocyte;Keratinocyte
chr1	117401472	117401672	Enhancer	ATP1A1;ATP1A1OS;NAP1L4P1;IGSF3;CD101;RP11;TTF2;TRIM45	Keratinocyte;Keratinocyte;Keratinocyte;Keratinocyte;Keratinocyte;Keratinocyte;Keratinocyte;Keratinocyte
chr1	117461913	117462113	Enhancer	ATP1A1;ATP1A1OS;NAP1L4P1;CD58;IGSF3;C1orf137;GAPDHP64;NEFHP1;PTGFRN;CD101;RP11;TTF2;TRIM45;MAN1A2	Keratinocyte;Keratinocyte;Keratinocyte;Keratinocyte;Keratinocyte;Keratinocyte;Keratinocyte;Keratinocyte;Keratinocyte;Keratinocyte;Keratinocyte;Keratinocyte;Keratinocyte;Keratinocyte
chr1	117594502	117594702	Enhancer	ATP1A1OS;NAP1L4P1;IGSF3;C1orf137;GAPDHP64;NEFHP1;PTGFRN;RP11;TTF2;RP11	Keratinocyte;Keratinocyte;Keratinocyte;Keratinocyte;Keratinocyte;Keratinocyte;Keratinocyte;Keratinocyte;Keratinocyte;Keratinocyte
chr1	118197843	118198043	Enhancer	AL365331.2	Keratinocyte
chr1	120229763	120229963	Enhancer	ZNF697;PHGDH;REG4;NBPF7;PFN1P9;NOTCH2	Keratinocyte;Keratinocyte;Keratinocyte;Keratinocyte;Keratinocyte;Keratinocyte
chr1	120255892	120256092	Enhancer	GAPDHP32;GAPDHP27;ZNF697;PHGDH;REG4;NBPF7;PFN1P9;RP5;NOTCH2	Keratinocyte;Keratinocyte;Keratinocyte;Keratinocyte;Keratinocyte;Keratinocyte;Keratinocyte;Keratinocyte;Keratinocyte
chr1	120256012	120256212	Enhancer	GAPDHP32;GAPDHP27;ZNF697;PHGDH;REG4;NBPF7;PFN1P9;RP5;NOTCH2	Keratinocyte;Keratinocyte;Keratinocyte;Keratinocyte;Keratinocyte;Keratinocyte;Keratinocyte;Keratinocyte;Keratinocyte
chr1	120327245	120327445	Enhancer	ZNF697;PHGDH	Keratinocyte;Keratinocyte
chr1	145449639	145449839	Enhancer	NBPF9;PDE4DIP;SEC22B;NUDT4P1;NOTCH2NL;NBPF10;RP11;RP11;HFE2;TXNIP;POLR3GL;ANKRD34A;LIX1L;RBM8A;RP11;GNRHR2;PEX11B;ITGA10;PIAS3;NUDT17;POLR3C;RNF115;GPR89A	Keratinocyte;Keratinocyte;Keratinocyte;Keratinocyte;Keratinocyte;Keratinocyte;Keratinocyte;Keratinocyte;Keratinocyte;Keratinocyte;Keratinocyte;Keratinocyte;Keratinocyte;Keratinocyte;Keratinocyte;Keratinocyte;Keratinocyte;Keratinocyte;Keratinocyte;Keratinocyte;Keratinocyte;Keratinocyte;Keratinocyte
chr1	145556824	145557024	Enhancer	SEC22B;NUDT4P1;NOTCH2NL;RP11;TXNIP;LIX1L;RBM8A;PEX11B;ANKRD35;PIAS3;NUDT17;POLR3C;RNF115	Keratinocyte;Keratinocyte;Keratinocyte;Keratinocyte;Keratinocyte;Keratinocyte;Keratinocyte;Keratinocyte;Keratinocyte;Keratinocyte;Keratinocyte;Keratinocyte;Keratinocyte
chr1	146638620	146638820	Enhancer	RP11;RP11;PRKAB2;RP11;PDIA3P;CCT8P1;RP11	Keratinocyte;Keratinocyte;Keratinocyte;Keratinocyte;Keratinocyte;Keratinocyte;Keratinocyte
chr1	150598476	150598676	Enhancer	VPS45;ANP32E;CA14;C1orf54;APH1A;C1orf51;MRPS21;PRPF3;RPRD2;TARS2;ECM1;LINC00568;ADAMTSL4;AL356356.1;RP11;C1orf138;MCL1;ENSA;GOLPH3L;HORMAD1	Keratinocyte;Keratinocyte;Keratinocyte;Keratinocyte;Keratinocyte;Keratinocyte;Keratinocyte;Keratinocyte;Keratinocyte;Keratinocyte;Keratinocyte;Keratinocyte;Keratinocyte;Keratinocyte;Keratinocyte;Keratinocyte;Keratinocyte;Keratinocyte;Keratinocyte;Keratinocyte
chr1	150600501	150600701	Enhancer	MRPS21;TARS2;ECM1;LINC00568;ADAMTSL4;AL356356.1;RP11;C1orf138;MCL1;SNORA40;ENSA;GOLPH3L;CTSS;RP11;UBE2D3P3;CTSK;ARNT;SETDB1;RP11;CERS2;FAM63A;PRUNE;VPS72;PIP5K1A;PSMD4;VPS45;ANP32E;CA14;C1orf54;APH1A;C1orf51;PRPF3;RPRD2;HORMAD1	HUVEC,Keratinocyte;HUVEC,Keratinocyte;HUVEC,Keratinocyte;HUVEC,Keratinocyte;HUVEC,Keratinocyte;HUVEC,Keratinocyte;HUVEC,Keratinocyte;HUVEC,Keratinocyte;HUVEC,Keratinocyte;HUVEC;HUVEC,Keratinocyte;HUVEC,Keratinocyte;HUVEC,Keratinocyte;HUVEC,Keratinocyte;HUVEC;HUVEC;HUVEC;HUVEC,Keratinocyte;HUVEC,Keratinocyte;HUVEC,Keratinocyte;HUVEC;HUVEC,Keratinocyte;HUVEC;HUVEC;HUVEC;Keratinocyte;Keratinocyte;Ke…
chr1	150970595	150970795	Enhancer	SNORA40;ENSA;GOLPH3L;UBE2D3P3;CTSK;ARNT;RP11;RP11;SETDB1;RP11;RP11;CERS2;ANXA9;FAM63A;PRUNE;BNIPL;C1orf56;MLLT11;CDC42SE1;RP11;GABPB2;RP11;SEMA6C;TNFAIP8L2;LYSMD1;SCNM1;TMOD4;VPS72;PIP5K1A;PSMD4;ZNF687;RP11;PI4KB;RP11;RP11;RFX5;SELENBP1;PSMB4	HUVEC;HUVEC;HUVEC;HUVEC;HUVEC;HUVEC;HUVEC;HUVEC;HUVEC;HUVEC;HUVEC;HUVEC;HUVEC;HUVEC;HUVEC;HUVEC;HUVEC;HUVEC;HUVEC;HUVEC;HUVEC;HUVEC;HUVEC;HUVEC;HUVEC;HUVEC;HUVEC;HUVEC;HUVEC;HUVEC;HUVEC;HUVEC;HUVEC;HUVEC;HUVEC;HUVEC;HUVEC;HUVEC
chr1	151009488	151009688	Enhancer	PRUNE;BNIPL;C1orf56;MLLT11;CDC42SE1;RP11;GABPB2;LYSMD1;SCNM1;TMOD4;VPS72;PIP5K1A;PSMD4;ZNF687;PI4KB;RFX5;RP11	Keratinocyte;Keratinocyte;Keratinocyte;Keratinocyte;Keratinocyte;Keratinocyte;Keratinocyte;Keratinocyte;Keratinocyte;Keratinocyte;Keratinocyte;Keratinocyte;Keratinocyte;Keratinocyte;Keratinocyte;Keratinocyte;Keratinocyte
chr1	151520113	151520313	Enhancer	VPS72;PIP5K1A;PSMD4;ZNF687;PI4KB;RP11;RP11;RFX5;SELENBP1;PSMB4;POGZ;CGN;TUFT1;RP11;RP11;RP11;SNX27;OAZ3;MRPL9;RP11;RP11;THEM4;S100A10;S100A11	Keratinocyte;Keratinocyte;Keratinocyte;Keratinocyte;Keratinocyte;Keratinocyte;Keratinocyte;Keratinocyte;Keratinocyte;Keratinocyte;Keratinocyte;Keratinocyte;Keratinocyte;Keratinocyte;Keratinocyte;Keratinocyte;Keratinocyte;Keratinocyte;Keratinocyte;Keratinocyte;Keratinocyte;Keratinocyte;Keratinocyte;Keratinocyte
chr1	151521594	151521794	Enhancer	CDC42SE1;SCNM1;VPS72;PIP5K1A;PSMD4;ZNF687;PI4KB;RP11;RP11;RFX5;SELENBP1;PSMB4;POGZ;CGN;TUFT1;RP11;RP11;RP11;SNX27;OAZ3;MRPL9;RP11;RP11;RP11;THEM4	Keratinocyte;Keratinocyte;Keratinocyte;Keratinocyte;Keratinocyte;Keratinocyte;Keratinocyte;Keratinocyte;Keratinocyte;Keratinocyte;Keratinocyte;Keratinocyte;Keratinocyte;Keratinocyte;Keratinocyte;Keratinocyte;Keratinocyte;Keratinocyte;Keratinocyte;Keratinocyte;Keratinocyte;Keratinocyte;Keratinocyte;Keratinocyte;Keratinocyte
chr1	152778480	152778680	Enhancer	LCE1E;LCE1C;LCE1B	Keratinocyte;Keratinocyte;Keratinocyte
chr1	153357384	153357584	Enhancer	SPRR4;SPRR1A;SPRR3;SPRR1B;SPRR2G;PRR9;RP1;PGLYRP3;PGLYRP4;S100A9;S100A12;AL591704.5;S100A8;S100A7A;BX470102.3;S100A6;S100A5;S100A3;S100A4;S100A2;S100A16;S100A14;S100A1;CHTOP;S100A13;SNAPIN;ILF2;RP11;INTS3;RP11;RP11;SLC27A3;RP11;CRTC2;SLC39A1;RPS27;RP11	Keratinocyte;Keratinocyte;Keratinocyte;Keratinocyte;Keratinocyte;Keratinocyte;Keratinocyte;Keratinocyte;Keratinocyte;Keratinocyte;Keratinocyte;Keratinocyte;Keratinocyte;Keratinocyte;Keratinocyte;Keratinocyte;Keratinocyte;Keratinocyte;Keratinocyte;Keratinocyte;Keratinocyte;Keratinocyte;Keratinocyte;Keratinocyte;Keratinocyte;Keratinocyte;Keratinocyte;Keratinocyte;Keratinocyte;Keratinocyte;Keratinoc…
chr1	153536178	153536378	Enhancer	AL591704.5;BX470102.3;S100A6;S100A5;S100A3;S100A4;S100A2;S100A16;S100A14;CHTOP;S100A13;ILF2;NPR1;RP11;RP11;INTS3;RP11;RP11;SLC27A3;RP11;RP11;SNAPIN;DENND4B;IVL;SPRR1A;SPRR1B;SPRR2B;SPRR2G;PRR9;LOR;PGLYRP3;PGLYRP4;S100A9;S100A12;S100A8;S100A7A;CRTC2;CREB3L4;SLC39A1;JTB;RAB13;RPS27	HUVEC,Keratinocyte;HUVEC,Keratinocyte;HUVEC,Keratinocyte;HUVEC,Keratinocyte;HUVEC,Keratinocyte;HUVEC,Keratinocyte;HUVEC,Keratinocyte;HUVEC,Keratinocyte;HUVEC,Keratinocyte;HUVEC,Keratinocyte;HUVEC,Keratinocyte;HUVEC,Keratinocyte;HUVEC;HUVEC,Keratinocyte;HUVEC,Keratinocyte;HUVEC,Keratinocyte;HUVEC,Keratinocyte;HUVEC,Keratinocyte;HUVEC,Keratinocyte;HUVEC,Keratinocyte;HUVEC,Keratinocyte;HUVEC,Keratin…
chr1	153536428	153536628	Enhancer	AL591704.5;BX470102.3;S100A6;S100A5;S100A3;S100A4;S100A2;S100A16;S100A14;CHTOP;S100A13;ILF2;NPR1;RP11;RP11;INTS3;RP11;RP11;SLC27A3;RP11;RP11;IVL;SPRR1A;SPRR1B;SPRR2B;SPRR2G;PRR9;LOR;PGLYRP3;PGLYRP4;S100A9;S100A12;S100A8;S100A7A;SNAPIN;CRTC2;CREB3L4;SLC39A1;JTB;RAB13	HUVEC,Keratinocyte;HUVEC,Keratinocyte;HUVEC,Keratinocyte;HUVEC,Keratinocyte;HUVEC,Keratinocyte;HUVEC,Keratinocyte;HUVEC,Keratinocyte;HUVEC,Keratinocyte;HUVEC,Keratinocyte;HUVEC,Keratinocyte;HUVEC,Keratinocyte;HUVEC,Keratinocyte;HUVEC;HUVEC,Keratinocyte;HUVEC,Keratinocyte;HUVEC,Keratinocyte;HUVEC,Keratinocyte;HUVEC,Keratinocyte;HUVEC,Keratinocyte;HUVEC,Keratinocyte;HUVEC,Keratinocyte;Keratinocyte;…
chr1	153536463	153536663	Enhancer	AL591704.5;BX470102.3;S100A6;S100A5;S100A3;S100A4;S100A2;S100A16;S100A14;CHTOP;S100A13;ILF2;NPR1;RP11;RP11;INTS3;RP11;RP11;SLC27A3;RP11;RP11;IVL;SPRR1A;SPRR1B;SPRR2B;SPRR2G;PRR9;LOR;PGLYRP3;PGLYRP4;S100A9;S100A12;S100A8;S100A7A;SNAPIN;CRTC2;CREB3L4;SLC39A1;JTB;RAB13	HUVEC,Keratinocyte;HUVEC,Keratinocyte;HUVEC,Keratinocyte;HUVEC,Keratinocyte;HUVEC,Keratinocyte;HUVEC,Keratinocyte;HUVEC,Keratinocyte;HUVEC,Keratinocyte;HUVEC,Keratinocyte;HUVEC,Keratinocyte;HUVEC,Keratinocyte;HUVEC,Keratinocyte;HUVEC;HUVEC,Keratinocyte;HUVEC,Keratinocyte;HUVEC,Keratinocyte;HUVEC,Keratinocyte;HUVEC,Keratinocyte;HUVEC,Keratinocyte;HUVEC,Keratinocyte;HUVEC,Keratinocyte;Keratinocyte;…
chr1	153580736	153580936	Enhancer	SPRR1A;SPRR1B;SPRR2G;RP1;PRR9;RP1;LOR;PGLYRP3;PGLYRP4;S100A9;S100A12;AL591704.5;S100A8;S100A7A;S100A7;BX470102.3;S100A6;S100A5;S100A3;S100A4;S100A2;S100A16;S100A14;S100A1;CHTOP;S100A13;SNAPIN;ILF2;RP11;INTS3;RP11;RP11;SLC27A3;RP11;CRTC2;CREB3L4;SLC39A1;JTB;RAB13;RPS27;RP11	Keratinocyte;Keratinocyte;Keratinocyte;Keratinocyte;Keratinocyte;Keratinocyte;Keratinocyte;Keratinocyte;Keratinocyte;Keratinocyte;Keratinocyte;Keratinocyte;Keratinocyte;Keratinocyte;Keratinocyte;Keratinocyte;Keratinocyte;Keratinocyte;Keratinocyte;Keratinocyte;Keratinocyte;Keratinocyte;Keratinocyte;Keratinocyte;Keratinocyte;Keratinocyte;Keratinocyte;Keratinocyte;Keratinocyte;Keratinocyte;Keratinoc…
chr1	153580770	153580970	Enhancer	SPRR1A;SPRR1B;SPRR2G;RP1;PRR9;RP1;LOR;PGLYRP3;PGLYRP4;S100A9;S100A12;AL591704.5;S100A8;S100A7A;S100A7;BX470102.3;S100A6;S100A5;S100A3;S100A4;S100A2;S100A16;S100A14;S100A1;CHTOP;S100A13;SNAPIN;ILF2;RP11;INTS3;RP11;RP11;SLC27A3;RP11;CRTC2;CREB3L4;SLC39A1;JTB;RAB13;RPS27;RP11	Keratinocyte;Keratinocyte;Keratinocyte;Keratinocyte;Keratinocyte;Keratinocyte;Keratinocyte;Keratinocyte;Keratinocyte;Keratinocyte;Keratinocyte;Keratinocyte;Keratinocyte;Keratinocyte;Keratinocyte;Keratinocyte;Keratinocyte;Keratinocyte;Keratinocyte;Keratinocyte;Keratinocyte;Keratinocyte;Keratinocyte;Keratinocyte;Keratinocyte;Keratinocyte;Keratinocyte;Keratinocyte;Keratinocyte;Keratinocyte;Keratinoc…
chr1	153580857	153581057	Enhancer	SPRR1A;SPRR1B;SPRR2G;RP1;PRR9;RP1;LOR;PGLYRP3;PGLYRP4;S100A9;S100A12;AL591704.5;S100A8;S100A7A;S100A7;BX470102.3;S100A6;S100A5;S100A3;S100A4;S100A2;S100A16;S100A14;S100A1;CHTOP;S100A13;SNAPIN;ILF2;RP11;INTS3;RP11;RP11;SLC27A3;RP11;CRTC2;CREB3L4;SLC39A1;JTB;RAB13;RPS27;RP11	Keratinocyte;Keratinocyte;Keratinocyte;Keratinocyte;Keratinocyte;Keratinocyte;Keratinocyte;Keratinocyte;Keratinocyte;Keratinocyte;Keratinocyte;Keratinocyte;Keratinocyte;Keratinocyte;Keratinocyte;Keratinocyte;Keratinocyte;Keratinocyte;Keratinocyte;Keratinocyte;Keratinocyte;Keratinocyte;Keratinocyte;Keratinocyte;Keratinocyte;Keratinocyte;Keratinocyte;Keratinocyte;Keratinocyte;Keratinocyte;Keratinoc…
chr1	153581394	153581594	Enhancer	SPRR1A;SPRR1B;SPRR2G;RP1;PRR9;RP1;LOR;PGLYRP3;PGLYRP4;S100A9;S100A12;AL591704.5;S100A8;S100A7A;S100A7;BX470102.3;S100A6;S100A5;S100A3;S100A4;S100A2;S100A16;S100A14;S100A1;CHTOP;S100A13;SNAPIN;ILF2;RP11;INTS3;RP11;RP11;SLC27A3;RP11;CRTC2;CREB3L4;SLC39A1;JTB;RAB13;RPS27;RP11	Keratinocyte;Keratinocyte;Keratinocyte;Keratinocyte;Keratinocyte;Keratinocyte;Keratinocyte;Keratinocyte;Keratinocyte;Keratinocyte;Keratinocyte;Keratinocyte;Keratinocyte;Keratinocyte;Keratinocyte;Keratinocyte;Keratinocyte;Keratinocyte;Keratinocyte;Keratinocyte;Keratinocyte;Keratinocyte;Keratinocyte;Keratinocyte;Keratinocyte;Keratinocyte;Keratinocyte;Keratinocyte;Keratinocyte;Keratinocyte;Keratinoc…
chr1	153581435	153581635	Enhancer	SPRR1A;SPRR1B;SPRR2G;RP1;PRR9;RP1;LOR;PGLYRP3;PGLYRP4;S100A9;S100A12;AL591704.5;S100A8;S100A7A;S100A7;BX470102.3;S100A6;S100A5;S100A3;S100A4;S100A2;S100A16;S100A14;S100A1;CHTOP;S100A13;SNAPIN;ILF2;RP11;INTS3;RP11;RP11;SLC27A3;RP11;CRTC2;CREB3L4;SLC39A1;JTB;RAB13;RPS27;RP11	Keratinocyte;Keratinocyte;Keratinocyte;Keratinocyte;Keratinocyte;Keratinocyte;Keratinocyte;Keratinocyte;Keratinocyte;Keratinocyte;Keratinocyte;Keratinocyte;Keratinocyte;Keratinocyte;Keratinocyte;Keratinocyte;Keratinocyte;Keratinocyte;Keratinocyte;Keratinocyte;Keratinocyte;Keratinocyte;Keratinocyte;Keratinocyte;Keratinocyte;Keratinocyte;Keratinocyte;Keratinocyte;Keratinocyte;Keratinocyte;Keratinoc…
chr1	153581555	153581755	Enhancer	SPRR1A;SPRR1B;SPRR2G;RP1;PRR9;RP1;LOR;PGLYRP3;PGLYRP4;S100A9;S100A12;AL591704.5;S100A8;S100A7A;S100A7;BX470102.3;S100A6;S100A5;S100A3;S100A4;S100A2;S100A16;S100A14;S100A1;CHTOP;S100A13;SNAPIN;ILF2;RP11;INTS3;RP11;RP11;SLC27A3;RP11;CRTC2;CREB3L4;SLC39A1;JTB;RAB13;RPS27;RP11	Keratinocyte;Keratinocyte;Keratinocyte;Keratinocyte;Keratinocyte;Keratinocyte;Keratinocyte;Keratinocyte;Keratinocyte;Keratinocyte;Keratinocyte;Keratinocyte;Keratinocyte;Keratinocyte;Keratinocyte;Keratinocyte;Keratinocyte;Keratinocyte;Keratinocyte;Keratinocyte;Keratinocyte;Keratinocyte;Keratinocyte;Keratinocyte;Keratinocyte;Keratinocyte;Keratinocyte;Keratinocyte;Keratinocyte;Keratinocyte;Keratinoc…
chr1	154399662	154399862	Enhancer	HAX1;ATP8B2;RP11;IL6R;RP11;RP11;SHE;UBE2Q1;CHRNB2;ADAR	Keratinocyte;Keratinocyte;Keratinocyte;Keratinocyte;Keratinocyte;Keratinocyte;Keratinocyte;Keratinocyte;Keratinocyte;Keratinocyte
chr1	154904633	154904833	Enhancer	PMVK;PBXIP1;PYGO2;SHC1;CKS1B;FLAD1;LENEP;ZBTB7B;DCST2;DCST1;RP11;ADAM15;EFNA4;EFNA3;EFNA1;SLC50A1;RP11;DPM3;HMGN2P18;TRIM46;KRTCAP2;RP11;MTX1;THBS3;RP11;GBAP1;MTX1P1;GBA;FAM189B;SCAMP3;HCN3;CLK2;FDPS;RUSC1;RUSC1	Keratinocyte;Keratinocyte;Keratinocyte;Keratinocyte;Keratinocyte;Keratinocyte;Keratinocyte;Keratinocyte;Keratinocyte;Keratinocyte;Keratinocyte;Keratinocyte;Keratinocyte;Keratinocyte;Keratinocyte;Keratinocyte;Keratinocyte;Keratinocyte;Keratinocyte;Keratinocyte;Keratinocyte;Keratinocyte;Keratinocyte;Keratinocyte;Keratinocyte;Keratinocyte;Keratinocyte;Keratinocyte;Keratinocyte;Keratinocyte;Keratinoc…
chr1	154986400	154986600	Enhancer	KCNN3;PMVK;PBXIP1;PYGO2;SHC1;CKS1B;FLAD1;LENEP;ZBTB7B;DCST2;DCST1;RP11;ADAM15;EFNA4;RP11;EFNA3;EFNA1;SLC50A1;RP11;DPM3;TRIM46;KRTCAP2;RP11;GBAP1;MTX1P1;GBA;FAM189B;SCAMP3	Keratinocyte;Keratinocyte;Keratinocyte;Keratinocyte;Keratinocyte;Keratinocyte;Keratinocyte;Keratinocyte;Keratinocyte;Keratinocyte;Keratinocyte;Keratinocyte;Keratinocyte;Keratinocyte;Keratinocyte;Keratinocyte;Keratinocyte;Keratinocyte;Keratinocyte;Keratinocyte;Keratinocyte;Keratinocyte;Keratinocyte;Keratinocyte;Keratinocyte;Keratinocyte;Keratinocyte;Keratinocyte
chr1	154986412	154986612	Enhancer	KCNN3;PMVK;PBXIP1;PYGO2;SHC1;CKS1B;FLAD1;LENEP;ZBTB7B;DCST2;DCST1;RP11;ADAM15;EFNA4;RP11;EFNA3;EFNA1;SLC50A1;RP11;DPM3;TRIM46;KRTCAP2;RP11;GBAP1;MTX1P1;GBA;FAM189B;SCAMP3	Keratinocyte;Keratinocyte;Keratinocyte;Keratinocyte;Keratinocyte;Keratinocyte;Keratinocyte;Keratinocyte;Keratinocyte;Keratinocyte;Keratinocyte;Keratinocyte;Keratinocyte;Keratinocyte;Keratinocyte;Keratinocyte;Keratinocyte;Keratinocyte;Keratinocyte;Keratinocyte;Keratinocyte;Keratinocyte;Keratinocyte;Keratinocyte;Keratinocyte;Keratinocyte;Keratinocyte;Keratinocyte
chr1	154992162	154992362	Enhancer	ADAR;KCNN3;PMVK;PBXIP1;PYGO2;SHC1;CKS1B;FLAD1;LENEP;ZBTB7B;DCST2;DCST1;RP11;ADAM15;EFNA4;RP11;EFNA3;EFNA1;SLC50A1;RP11;DPM3;HMGN2P18;TRIM46;KRTCAP2;MUC1;RP11;MTX1;THBS3;RP11;GBAP1;MTX1P1;FAM189B;SCAMP3;HCN3;CLK2;FDPS;RUSC1;RUSC1	Keratinocyte;Keratinocyte;Keratinocyte;Keratinocyte;Keratinocyte;Keratinocyte;Keratinocyte;Keratinocyte;Keratinocyte;Keratinocyte;Keratinocyte;Keratinocyte;Keratinocyte;Keratinocyte;Keratinocyte;Keratinocyte;Keratinocyte;Keratinocyte;Keratinocyte;Keratinocyte;Keratinocyte;Keratinocyte;Keratinocyte;Keratinocyte;Keratinocyte;Keratinocyte;Keratinocyte;Keratinocyte;Keratinocyte;Keratinocyte;Keratinoc…
chr1	154999068	154999268	Enhancer	KCNN3;PMVK;PBXIP1;PYGO2;SHC1;CKS1B;FLAD1;ZBTB7B;DCST2;DCST1;RP11;ADAM15;EFNA4;RP11;EFNA3;EFNA1;SLC50A1;RP11;DPM3;HMGN2P18;TRIM46;KRTCAP2;MUC1;RP11;MTX1;THBS3;RP11;MTX1P1;AL713999.1;GBA;FAM189B;SCAMP3;CLK2;FDPS;RUSC1;RUSC1;snoU13	HUVEC;HUVEC;HUVEC;HUVEC;HUVEC;HUVEC;HUVEC;HUVEC;HUVEC;HUVEC;HUVEC;HUVEC;HUVEC;HUVEC;HUVEC;HUVEC;HUVEC;HUVEC;HUVEC;HUVEC;HUVEC;HUVEC;HUVEC;HUVEC;HUVEC;HUVEC;HUVEC;HUVEC;HUVEC;HUVEC;HUVEC;HUVEC;HUVEC;HUVEC;HUVEC;HUVEC;HUVEC
chr1	155011294	155011494	Enhancer	KCNN3;PMVK;PBXIP1;PYGO2;SHC1;CKS1B;FLAD1;LENEP;ZBTB7B;DCST2;DCST1;RP11;ADAM15;EFNA4;RP11;EFNA3;EFNA1;SLC50A1;RP11;DPM3;HMGN2P18;TRIM46;KRTCAP2;MUC1;RP11;MTX1;THBS3;RP11;GBAP1;MTX1P1;FDPS;RUSC1;RUSC1	Keratinocyte;Keratinocyte;Keratinocyte;Keratinocyte;Keratinocyte;Keratinocyte;Keratinocyte;Keratinocyte;Keratinocyte;Keratinocyte;Keratinocyte;Keratinocyte;Keratinocyte;Keratinocyte;Keratinocyte;Keratinocyte;Keratinocyte;Keratinocyte;Keratinocyte;Keratinocyte;Keratinocyte;Keratinocyte;Keratinocyte;Keratinocyte;Keratinocyte;Keratinocyte;Keratinocyte;Keratinocyte;Keratinocyte;Keratinocyte;Keratinoc…
chr1	155102288	155102488	Enhancer	KCNN3;PMVK;PBXIP1;PYGO2;SHC1;CKS1B;FLAD1;ZBTB7B;DCST2;DCST1;RP11;ADAM15;EFNA4;RP11;EFNA1;SLC50A1;RP11;DPM3;HMGN2P18;TRIM46;KRTCAP2;MUC1;RP11;MTX1;THBS3;RP11;GBAP1;MTX1P1;AL713999.1;GBA;FAM189B;SCAMP3;HCN3;CLK2;FDPS;RUSC1;RUSC1;snoU13;LENEP	HUVEC;HUVEC,Keratinocyte;HUVEC,Keratinocyte;HUVEC,Keratinocyte;HUVEC,Keratinocyte;HUVEC,Keratinocyte;HUVEC,Keratinocyte;HUVEC,Keratinocyte;HUVEC,Keratinocyte;HUVEC,Keratinocyte;HUVEC,Keratinocyte;HUVEC,Keratinocyte;HUVEC;HUVEC,Keratinocyte;HUVEC,Keratinocyte;HUVEC,Keratinocyte;HUVEC,Keratinocyte;HUVEC,Keratinocyte;HUVEC,Keratinocyte;HUVEC,Keratinocyte;HUVEC,Keratinocyte;HUVEC,Keratinocyte;HUVEC,K…
chr1	155973630	155973830	Enhancer	MSTO1;RP11;DAP3;YY1AP1;ARHGEF2;RP11;SSR2;UBQLN4;LAMTOR2;RAB25;MEX3A;LMNA;SEMA4A;SLC25A44;RP11;PMF1;BGLAP;PAQR6;SMG5;TMEM79;C1orf85;C1orf182;CCT3;APOA1BP	Keratinocyte;Keratinocyte;Keratinocyte;Keratinocyte;Keratinocyte;Keratinocyte;Keratinocyte;Keratinocyte;Keratinocyte;Keratinocyte;Keratinocyte;Keratinocyte;Keratinocyte;Keratinocyte;Keratinocyte;Keratinocyte;Keratinocyte;Keratinocyte;Keratinocyte;Keratinocyte;Keratinocyte;Keratinocyte;Keratinocyte;Keratinocyte
chr1	155976891	155977091	Enhancer	MSTO1;RP11;DAP3;YY1AP1;ARHGEF2;SSR2;UBQLN4;LAMTOR2;RAB25;MEX3A;LMNA;SEMA4A;SLC25A44;RP11;PMF1;BGLAP;PAQR6;SMG5;TMEM79;C1orf85;CCT3;APOA1BP	Keratinocyte;Keratinocyte;Keratinocyte;Keratinocyte;Keratinocyte;Keratinocyte;Keratinocyte;Keratinocyte;Keratinocyte;Keratinocyte;Keratinocyte;Keratinocyte;Keratinocyte;Keratinocyte;Keratinocyte;Keratinocyte;Keratinocyte;Keratinocyte;Keratinocyte;Keratinocyte;Keratinocyte;Keratinocyte
chr1	156216857	156217057	Enhancer	DAP3;GON4L;RIT1;KIAA0907;ARHGEF2;SSR2;UBQLN4;LAMTOR2;RAB25;MEX3A;LMNA;SLC25A44;RP11;PMF1;BGLAP;PAQR6;SMG5;TMEM79;C1orf85;C1orf182;CCT3;RHBG;RP11;C1orf61;MEF2D;APOA1BP;GPATCH4;MRPL24;PRCC	Keratinocyte;Keratinocyte;Keratinocyte;Keratinocyte;Keratinocyte;Keratinocyte;Keratinocyte;Keratinocyte;Keratinocyte;Keratinocyte;Keratinocyte;Keratinocyte;Keratinocyte;Keratinocyte;Keratinocyte;Keratinocyte;Keratinocyte;Keratinocyte;Keratinocyte;Keratinocyte;Keratinocyte;Keratinocyte;Keratinocyte;Keratinocyte;Keratinocyte;Keratinocyte;Keratinocyte;Keratinocyte;Keratinocyte
chr1	156217078	156217278	Enhancer	DAP3;GON4L;RIT1;KIAA0907;ARHGEF2;SSR2;UBQLN4;LAMTOR2;RAB25;MEX3A;LMNA;SLC25A44;RP11;PMF1;BGLAP;PAQR6;SMG5;TMEM79;C1orf85;C1orf182;CCT3;RHBG;RP11;C1orf61;MEF2D;APOA1BP;GPATCH4;MRPL24;PRCC	Keratinocyte;Keratinocyte;Keratinocyte;Keratinocyte;Keratinocyte;Keratinocyte;Keratinocyte;Keratinocyte;Keratinocyte;Keratinocyte;Keratinocyte;Keratinocyte;Keratinocyte;Keratinocyte;Keratinocyte;Keratinocyte;Keratinocyte;Keratinocyte;Keratinocyte;Keratinocyte;Keratinocyte;Keratinocyte;Keratinocyte;Keratinocyte;Keratinocyte;Keratinocyte;Keratinocyte;Keratinocyte;Keratinocyte
chr1	156232201	156232401	Enhancer	DAP3;RP11;GON4L;RIT1;KIAA0907;ARHGEF2;RP11;SSR2;UBQLN4;LAMTOR2;RAB25;MEX3A;LMNA;SEMA4A;SLC25A44;RP11;PMF1;BGLAP;PAQR6;SMG5;TMEM79;C1orf85;C1orf182;CCT3;RHBG;RP11;C1orf61	Keratinocyte;Keratinocyte;Keratinocyte;Keratinocyte;Keratinocyte;Keratinocyte;Keratinocyte;Keratinocyte;Keratinocyte;Keratinocyte;Keratinocyte;Keratinocyte;Keratinocyte;Keratinocyte;Keratinocyte;Keratinocyte;Keratinocyte;Keratinocyte;Keratinocyte;Keratinocyte;Keratinocyte;Keratinocyte;Keratinocyte;Keratinocyte;Keratinocyte;Keratinocyte;Keratinocyte
chr1	156432087	156432287	Enhancer	SSR2;UBQLN4;LAMTOR2;RAB25;MEX3A;LMNA;SEMA4A;SLC25A44;PMF1;BGLAP;PAQR6;MEF2D;CRABP2;RRNAD1;ISG20L2;MRPL24;PRCC;HDGF	Keratinocyte;Keratinocyte;Keratinocyte;Keratinocyte;Keratinocyte;Keratinocyte;Keratinocyte;Keratinocyte;Keratinocyte;Keratinocyte;Keratinocyte;Keratinocyte;Keratinocyte;Keratinocyte;Keratinocyte;Keratinocyte;Keratinocyte;Keratinocyte
chr1	156899069	156899269	Enhancer	SSR2;LAMTOR2;AL355388.1;LMNA;SMG5;C1orf85;CCT3;MEF2D;IQGAP3;APOA1BP;GPATCH4;BCAN;RP11;NES;CRABP2;RP11;RRNAD1;ISG20L2;MRPL24;PRCC;HDGF;NTRK1;SH2D2A;INSRR;PEAR1;LRRC71;MIR765;RP11;ETV3	HUVEC;HUVEC;HUVEC;HUVEC;HUVEC;HUVEC;HUVEC;HUVEC;HUVEC;HUVEC;HUVEC;HUVEC;HUVEC;HUVEC;HUVEC;HUVEC;HUVEC;HUVEC;HUVEC;HUVEC;HUVEC;HUVEC;HUVEC;HUVEC;HUVEC;HUVEC;HUVEC;HUVEC;HUVEC
chr1	157986741	157986941	Enhancer	RP11;KIRREL;KIRREL;ELL2P1;CD1D	Keratinocyte;Keratinocyte;Keratinocyte;Keratinocyte;Keratinocyte
chr1	157998898	157999098	Enhancer	RP11;KIRREL;KIRREL	Keratinocyte;Keratinocyte;Keratinocyte
chr1	159842763	159842963	Enhancer	DUSP23;C1orf204;VSIG8;RP11;CCDC19;TAGLN2;IGSF9;SLAMF9;RP11;RP11;PIGM;IGSF8;ATP1A2;ATP1A4;PEA15;RP11;RP11;RP11;DCAF8;PEX19;RP11;NCSTN;COPA	Keratinocyte;Keratinocyte;Keratinocyte;Keratinocyte;Keratinocyte;Keratinocyte;Keratinocyte;Keratinocyte;Keratinocyte;Keratinocyte;Keratinocyte;Keratinocyte;Keratinocyte;Keratinocyte;Keratinocyte;Keratinocyte;Keratinocyte;Keratinocyte;Keratinocyte;Keratinocyte;Keratinocyte;Keratinocyte;Keratinocyte
chr1	159842799	159842999	Enhancer	DUSP23;C1orf204;VSIG8;RP11;CCDC19;TAGLN2;IGSF9;SLAMF9;RP11;RP11;PIGM;IGSF8;ATP1A2;ATP1A4;PEA15;RP11;RP11;RP11;DCAF8;PEX19;RP11;NCSTN;COPA	Keratinocyte;Keratinocyte;Keratinocyte;Keratinocyte;Keratinocyte;Keratinocyte;Keratinocyte;Keratinocyte;Keratinocyte;Keratinocyte;Keratinocyte;Keratinocyte;Keratinocyte;Keratinocyte;Keratinocyte;Keratinocyte;Keratinocyte;Keratinocyte;Keratinocyte;Keratinocyte;Keratinocyte;Keratinocyte;Keratinocyte
chr1	159842829	159843029	Enhancer	DUSP23;C1orf204;VSIG8;RP11;CCDC19;TAGLN2;IGSF9;SLAMF9;RP11;RP11;PIGM;IGSF8;ATP1A2;ATP1A4;PEA15;RP11;RP11;RP11;DCAF8;PEX19;RP11;NCSTN;COPA	Keratinocyte;Keratinocyte;Keratinocyte;Keratinocyte;Keratinocyte;Keratinocyte;Keratinocyte;Keratinocyte;Keratinocyte;Keratinocyte;Keratinocyte;Keratinocyte;Keratinocyte;Keratinocyte;Keratinocyte;Keratinocyte;Keratinocyte;Keratinocyte;Keratinocyte;Keratinocyte;Keratinocyte;Keratinocyte;Keratinocyte
chr1	159843077	159843277	Enhancer	DUSP23;C1orf204;VSIG8;RP11;CCDC19;TAGLN2;IGSF9;SLAMF9;RP11;RP11;PIGM;IGSF8;ATP1A2;ATP1A4;PEA15;RP11;RP11;RP11;DCAF8;PEX19;RP11;NCSTN;COPA	Keratinocyte;Keratinocyte;Keratinocyte;Keratinocyte;Keratinocyte;Keratinocyte;Keratinocyte;Keratinocyte;Keratinocyte;Keratinocyte;Keratinocyte;Keratinocyte;Keratinocyte;Keratinocyte;Keratinocyte;Keratinocyte;Keratinocyte;Keratinocyte;Keratinocyte;Keratinocyte;Keratinocyte;Keratinocyte;Keratinocyte
chr1	159885595	159885795	Enhancer	DUSP23;RP11;TAGLN2;IGSF9;SLAMF9;RP11;RP11;RP11;PIGM;RP11;IGSF8;PEA15;RP11;RP11;RP11;DCAF8;PEX19;RP11;NCSTN;COPA	Keratinocyte;Keratinocyte;Keratinocyte;Keratinocyte;Keratinocyte;Keratinocyte;Keratinocyte;Keratinocyte;Keratinocyte;Keratinocyte;Keratinocyte;Keratinocyte;Keratinocyte;Keratinocyte;Keratinocyte;Keratinocyte;Keratinocyte;Keratinocyte;Keratinocyte;Keratinocyte
chr1	159886241	159886441	Enhancer	DUSP23;RP11;TAGLN2;IGSF9;SLAMF9;RP11;RP11;RP11;PIGM;RP11;IGSF8;PEA15;RP11;RP11;RP11;DCAF8;PEX19;RP11;NCSTN;COPA	Keratinocyte;Keratinocyte;Keratinocyte;Keratinocyte;Keratinocyte;Keratinocyte;Keratinocyte;Keratinocyte;Keratinocyte;Keratinocyte;Keratinocyte;Keratinocyte;Keratinocyte;Keratinocyte;Keratinocyte;Keratinocyte;Keratinocyte;Keratinocyte;Keratinocyte;Keratinocyte
chr1	160094854	160095054	Enhancer	DUSP23;VSIG8;RP11;TAGLN2;RP11;ATP1A2;RP11;RP11;RP11;DCAF8;RP11;PEX19;RP11;NCSTN;COPA	Keratinocyte;Keratinocyte;Keratinocyte;Keratinocyte;Keratinocyte;Keratinocyte;Keratinocyte;Keratinocyte;Keratinocyte;Keratinocyte;Keratinocyte;Keratinocyte;Keratinocyte;Keratinocyte;Keratinocyte
chr1	160374411	160374611	Enhancer	DUSP23;RP11;PIGM;IGSF8;PEA15;RP11;NCSTN;COPA;NHLH1;VANGL2	Keratinocyte;Keratinocyte;Keratinocyte;Keratinocyte;Keratinocyte;Keratinocyte;Keratinocyte;Keratinocyte;Keratinocyte;Keratinocyte
chr1	161044880	161045080	Enhancer	RP11;RP11;TSTD1;F11R;USF1;ARHGAP30;NIT1;PFDN2;DEDD;UFC1;RP11;USP21;B4GALT3;SDHC;PVRL4;KLHDC9;PPOX;NDUFS2;ADAMTS4;FCER1G;TOMM40L;NR1I3;C1orf192;RRM2P2	HUVEC,Keratinocyte;HUVEC,Keratinocyte;HUVEC,Keratinocyte;HUVEC,Keratinocyte;HUVEC;HUVEC,Keratinocyte;HUVEC,Keratinocyte;HUVEC,Keratinocyte;HUVEC,Keratinocyte;HUVEC,Keratinocyte;HUVEC,Keratinocyte;HUVEC,Keratinocyte;HUVEC,Keratinocyte;HUVEC,Keratinocyte;Keratinocyte;Keratinocyte;Keratinocyte;Keratinocyte;Keratinocyte;Keratinocyte;Keratinocyte;Keratinocyte;Keratinocyte;Keratinocyte
chr1	161053919	161054119	Enhancer	AL121985.1;SLAMF7;CD244;RP11;RP11;RP11;ITLN2;RP11;TSTD1;F11R;USF1;ARHGAP30;PVRL4;KLHDC9;NIT1;PFDN2;DEDD;UFC1;RP11;USP21;PPOX;B4GALT3;NDUFS2;FCER1G;TOMM40L;NR1I3;MPZ;SDHC;C1orf192;RRM2P2;RP11	Keratinocyte;Keratinocyte;Keratinocyte;Keratinocyte;Keratinocyte;Keratinocyte;Keratinocyte;Keratinocyte;Keratinocyte;Keratinocyte;Keratinocyte;Keratinocyte;Keratinocyte;Keratinocyte;Keratinocyte;Keratinocyte;Keratinocyte;Keratinocyte;Keratinocyte;Keratinocyte;Keratinocyte;Keratinocyte;Keratinocyte;Keratinocyte;Keratinocyte;Keratinocyte;Keratinocyte;Keratinocyte;Keratinocyte;Keratinocyte;Keratinoc…
chr1	161056361	161056561	Enhancer	SLAMF7;RP11;RP11;RP11;RP11;TSTD1;F11R;USF1;ARHGAP30;PVRL4;KLHDC9;NIT1;PFDN2;DEDD;UFC1;RP11;USP21;PPOX;B4GALT3;NDUFS2;FCER1G;TOMM40L;NR1I3;PCP4L1;MPZ;SDHC;C1orf192;RRM2P2;RP11	Keratinocyte;Keratinocyte;Keratinocyte;Keratinocyte;Keratinocyte;Keratinocyte;Keratinocyte;Keratinocyte;Keratinocyte;Keratinocyte;Keratinocyte;Keratinocyte;Keratinocyte;Keratinocyte;Keratinocyte;Keratinocyte;Keratinocyte;Keratinocyte;Keratinocyte;Keratinocyte;Keratinocyte;Keratinocyte;Keratinocyte;Keratinocyte;Keratinocyte;Keratinocyte;Keratinocyte;Keratinocyte;Keratinocyte
chr1	161706193	161706393	Enhancer	RPL31P11;FCRLA;FCRLB;DUSP12;ATF6;RP11	Keratinocyte;Keratinocyte;Keratinocyte;Keratinocyte;Keratinocyte;Keratinocyte
chr1	162517982	162518182	Enhancer	UHMK1;UAP1	Keratinocyte;Keratinocyte
chr1	162666682	162666882	Enhancer	UHMK1	Keratinocyte
chr1	164640680	164640880	Enhancer	PBX1	Keratinocyte
chr1	167131939	167132139	Enhancer	POGK;CREG1	Keratinocyte;Keratinocyte
chr1	167131965	167132165	Enhancer	POGK;CREG1	Keratinocyte;Keratinocyte
chr1	168082016	168082216	Enhancer	RP4;GPR161;RP1;SFT2D2;TBX19;QRSL1P1	Keratinocyte;Keratinocyte;Keratinocyte;Keratinocyte;Keratinocyte;Keratinocyte
chr1	168230786	168230986	Enhancer	DCAF6;BRP44;RP4;GPR161;TIPRL;RP1;SFT2D2;ANKRD36BP1;RP4	Keratinocyte;Keratinocyte;Keratinocyte;Keratinocyte;Keratinocyte;Keratinocyte;Keratinocyte;Keratinocyte;Keratinocyte
chr1	169029518	169029718	Enhancer	RP11;ATP1B1;NME7;BLZF1;SLC19A2	Keratinocyte;Keratinocyte;Keratinocyte;Keratinocyte;Keratinocyte
chr1	169085036	169085236	Enhancer	SUMO1P2;RP11;RP11;ATP1B1;NME7;BLZF1;SLC19A2	Keratinocyte;Keratinocyte;Keratinocyte;Keratinocyte;Keratinocyte;Keratinocyte;Keratinocyte
chr1	169453450	169453650	Enhancer	RP11;ATP1B1;C1orf114;SLC19A2;AL021068.1	Keratinocyte;Keratinocyte;Keratinocyte;Keratinocyte;Keratinocyte
chr1	169968444	169968644	Enhancer	SCYL3;AL356475.1;KIFAP3	Keratinocyte;Keratinocyte;Keratinocyte
chr1	171366238	171366438	Enhancer	AL021579.1;PFN1P1;RP4;VAMP4;METTL13	Keratinocyte;Keratinocyte;Keratinocyte;Keratinocyte;Keratinocyte
chr1	171372542	171372742	Enhancer	AL021579.1;PFN1P1;RP4;VAMP4;METTL13	Keratinocyte;Keratinocyte;Keratinocyte;Keratinocyte;Keratinocyte
chr1	171457511	171457711	Enhancer	HMGB1P11;FMO4;RP4;PRRC2C;AL021579.1	Keratinocyte;Keratinocyte;Keratinocyte;Keratinocyte;Keratinocyte
chr1	171723658	171723858	Enhancer	PRRC2C;PFN1P1;METTL13;RP4;DNM3	Keratinocyte;Keratinocyte;Keratinocyte;Keratinocyte;Keratinocyte
chr1	172009761	172009961	Enhancer	PFN1P1;RP4;METTL13;PIGC	Keratinocyte;Keratinocyte;Keratinocyte;Keratinocyte
chr1	172291627	172291827	Enhancer	PIGC;C1orf9;RP3	Keratinocyte;Keratinocyte;Keratinocyte
chr1	172294799	172294999	Enhancer	C1orf9;RP3	Keratinocyte;Keratinocyte
chr1	172445279	172445479	Enhancer	C1orf9;RP3	Keratinocyte;Keratinocyte
chr1	172466357	172466557	Enhancer	PIGC;C1orf9;RP3	Keratinocyte;Keratinocyte;Keratinocyte
chr1	172468868	172469068	Enhancer	PIGC;RP3	Keratinocyte;Keratinocyte
chr1	172887154	172887354	Enhancer	C1orf9	Keratinocyte
chr1	173097918	173098118	Enhancer	RP3;GOT2P2;PRDX6	Keratinocyte;Keratinocyte;Keratinocyte
chr1	173159309	173159509	Enhancer	GOT2P2;TNFSF4;PRDX6	Keratinocyte;Keratinocyte;Keratinocyte
chr1	173496418	173496618	Enhancer	GOT2P2;RP11;PRDX6	Keratinocyte;Keratinocyte;Keratinocyte
chr1	174786950	174787150	Enhancer	RP11;RP11;RABGAP1L;CACYBP;MRPS14;SDCCAG3P2;KIAA0040	Keratinocyte;Keratinocyte;Keratinocyte;Keratinocyte;Keratinocyte;Keratinocyte;Keratinocyte
chr1	175440358	175440558	Enhancer	KIAA0040	Keratinocyte
chr1	175518359	175518559	Enhancer	KIAA0040	Keratinocyte
chr1	178914886	178915086	Enhancer	RP11;TOR3A;EIF4A1P11;ABL2;SOAT1;MEF2AP1	Keratinocyte;Keratinocyte;Keratinocyte;Keratinocyte;Keratinocyte;Keratinocyte
chr1	180469047	180469247	Enhancer	ACBD6;RP11;XPR1	Keratinocyte;Keratinocyte;Keratinocyte
chr1	180491388	180491588	Enhancer	VDAC1P4	Keratinocyte
chr1	182056830	182057030	Enhancer	RP11;GLUL	Keratinocyte;Keratinocyte
chr1	182057593	182057793	Enhancer	RP11;GLUL	Keratinocyte;Keratinocyte
chr1	182057604	182057804	Enhancer	RP11;GLUL	Keratinocyte;Keratinocyte
chr1	182771097	182771297	Enhancer	GLUL;NPL;DHX9;LAMC2	Keratinocyte;Keratinocyte;Keratinocyte;Keratinocyte
chr1	182771890	182772090	Enhancer	GLUL;NPL;DHX9;LAMC2	Keratinocyte;Keratinocyte;Keratinocyte;Keratinocyte
chr1	183056311	183056511	Enhancer	LAMC1;RP11;LAMC2;NMNAT2;SMG7;RP11;ARPC5	Keratinocyte;Keratinocyte;Keratinocyte;Keratinocyte;Keratinocyte;Keratinocyte;Keratinocyte
chr1	183117809	183118009	Enhancer	NPL;DHX9;HMGN1P4;KRT18P28;LAMC1;RP11;LAMC2;NMNAT2;SMG7;RP11;NCF2;ARPC5	Keratinocyte;Keratinocyte;Keratinocyte;Keratinocyte;Keratinocyte;Keratinocyte;Keratinocyte;Keratinocyte;Keratinocyte;Keratinocyte;Keratinocyte;Keratinocyte
chr1	183129121	183129321	Enhancer	NPL;DHX9;HMGN1P4;KRT18P28;LAMC1;RP11;LAMC2;NMNAT2;SMG7;RP11;NCF2;ARPC5	Keratinocyte;Keratinocyte;Keratinocyte;Keratinocyte;Keratinocyte;Keratinocyte;Keratinocyte;Keratinocyte;Keratinocyte;Keratinocyte;Keratinocyte;Keratinocyte
chr1	183133636	183133836	Enhancer	NPL;DHX9;HMGN1P4;KRT18P28;LAMC1;RP11;LAMC2;NMNAT2;SMG7;RP11;NCF2;ARPC5	Keratinocyte;Keratinocyte;Keratinocyte;Keratinocyte;Keratinocyte;Keratinocyte;Keratinocyte;Keratinocyte;Keratinocyte;Keratinocyte;Keratinocyte;Keratinocyte
chr1	183167618	183167818	Enhancer	NPL;DHX9;HMGN1P4;KRT18P28;LAMC1;RP11;LAMC2;NMNAT2;SMG7;RP11;NCF2;ARPC5;RGL1	Keratinocyte;Keratinocyte;Keratinocyte;Keratinocyte;Keratinocyte;Keratinocyte;Keratinocyte;Keratinocyte;Keratinocyte;Keratinocyte;Keratinocyte;Keratinocyte;Keratinocyte
chr1	183204689	183204889	Enhancer	LAMC1;RP11;LAMC2;NMNAT2;SMG7;RP11	HUVEC;HUVEC;HUVEC;HUVEC;HUVEC;HUVEC
chr1	184395206	184395406	Enhancer	TSEN15;C1orf21;GS1;GS1;EDEM3	Keratinocyte;Keratinocyte;Keratinocyte;Keratinocyte;Keratinocyte
chr1	184454965	184455165	Enhancer	C1orf21;GS1;GS1;EDEM3	Keratinocyte;Keratinocyte;Keratinocyte;Keratinocyte
chr1	184514657	184514857	Enhancer	C1orf21;GS1;GS1;EDEM3;FAM129A;CTA	Keratinocyte;Keratinocyte;Keratinocyte;Keratinocyte;Keratinocyte;Keratinocyte
chr1	184516982	184517182	Enhancer	TSEN15;C1orf21;GS1;GS1;EDEM3;FAM129A	Keratinocyte;Keratinocyte;Keratinocyte;Keratinocyte;Keratinocyte;Keratinocyte
chr1	184559402	184559602	Enhancer	TSEN15;C1orf21;GS1;GS1;EDEM3;FAM129A	Keratinocyte;Keratinocyte;Keratinocyte;Keratinocyte;Keratinocyte;Keratinocyte
chr1	184559662	184559862	Enhancer	TSEN15;C1orf21;GS1;GS1;EDEM3;FAM129A	Keratinocyte;Keratinocyte;Keratinocyte;Keratinocyte;Keratinocyte;Keratinocyte
chr1	184559690	184559890	Enhancer	TSEN15;C1orf21;GS1;GS1;EDEM3;FAM129A	Keratinocyte;Keratinocyte;Keratinocyte;Keratinocyte;Keratinocyte;Keratinocyte
chr1	184899484	184899684	Enhancer	C1orf21;EDEM3;FAM129A;RNF2;FTH1P25;TRMT1L;SWT1;CTA;RP4;IVNS1ABP	Keratinocyte;Keratinocyte;Keratinocyte;Keratinocyte;Keratinocyte;Keratinocyte;Keratinocyte;Keratinocyte;Keratinocyte;Keratinocyte
chr1	184899489	184899689	Enhancer	C1orf21;EDEM3;FAM129A;RNF2;FTH1P25;TRMT1L;SWT1;CTA;RP4;IVNS1ABP	Keratinocyte;Keratinocyte;Keratinocyte;Keratinocyte;Keratinocyte;Keratinocyte;Keratinocyte;Keratinocyte;Keratinocyte;Keratinocyte
chr1	185281494	185281694	Enhancer	FAM129A;RP4;RP4;IVNS1ABP	Keratinocyte;Keratinocyte;Keratinocyte;Keratinocyte
chr1	185281547	185281747	Enhancer	FAM129A;RP4;RP4;IVNS1ABP	Keratinocyte;Keratinocyte;Keratinocyte;Keratinocyte
chr1	185335531	185335731	Enhancer	FAM129A;RNF2;RP4	Keratinocyte;Keratinocyte;Keratinocyte
chr1	185374434	185374634	Enhancer	RNF2;TRMT1L;SWT1;RP4	Keratinocyte;Keratinocyte;Keratinocyte;Keratinocyte
chr1	185381362	185381562	Enhancer	RNF2;TRMT1L;SWT1;CTA;RP4	Keratinocyte;Keratinocyte;Keratinocyte;Keratinocyte;Keratinocyte
chr1	185497529	185497729	Enhancer	CTA;RP4	Keratinocyte;Keratinocyte
chr1	186409659	186409859	Enhancer	OCLM;PTGS2;PLA2G4A	Keratinocyte;Keratinocyte;Keratinocyte
chr1	192694004	192694204	Enhancer	MIR4426;TROVE2;UCHL5;GLRX2;CDC73	Keratinocyte;Keratinocyte;Keratinocyte;Keratinocyte;Keratinocyte
chr1	192862547	192862747	Enhancer	MIR4426;RP3;RGS2;TROVE2;UCHL5;GLRX2;CDC73	Keratinocyte;Keratinocyte;Keratinocyte;Keratinocyte;Keratinocyte;Keratinocyte;Keratinocyte
chr1	192872471	192872671	Enhancer	MIR4426;RP3;RGS2;TROVE2;UCHL5;CDC73	Keratinocyte;Keratinocyte;Keratinocyte;Keratinocyte;Keratinocyte;Keratinocyte
chr1	198412661	198412861	Enhancer	NEK7;RP11	Keratinocyte;Keratinocyte
chr1	198806496	198806696	Enhancer	RP11	Keratinocyte
chr1	198901962	198902162	Enhancer	RP11;RP11	Keratinocyte;Keratinocyte
chr1	200447233	200447433	Enhancer	RP11;CAMSAP2;RPL34P1;C1orf106	Keratinocyte;Keratinocyte;Keratinocyte;Keratinocyte
chr1	200623546	200623746	Enhancer	KIF14;RP11;DDX59;CAMSAP2;RPL34P1;C1orf106;TMEM9;PKP1	Keratinocyte;Keratinocyte;Keratinocyte;Keratinocyte;Keratinocyte;Keratinocyte;Keratinocyte;Keratinocyte
chr1	200740862	200741062	Enhancer	ZNF281;RP11;KIF14;RP11;DDX59;CAMSAP2;RPL34P1;TMEM9;LAD1	Keratinocyte;Keratinocyte;Keratinocyte;Keratinocyte;Keratinocyte;Keratinocyte;Keratinocyte;Keratinocyte;Keratinocyte
chr1	200877356	200877556	Enhancer	KIF14;RP11;DDX59;CAMSAP2;RPL34P1;GPR25;C1orf106;LAD1;PHLDA3;CSRP1;RP11	Keratinocyte;Keratinocyte;Keratinocyte;Keratinocyte;Keratinocyte;Keratinocyte;Keratinocyte;Keratinocyte;Keratinocyte;Keratinocyte;Keratinocyte
chr1	200877874	200878074	Enhancer	KIF14;RP11;DDX59;CAMSAP2;RPL34P1;GPR25;C1orf106;LAD1;PHLDA3;CSRP1;RP11	Keratinocyte;Keratinocyte;Keratinocyte;Keratinocyte;Keratinocyte;Keratinocyte;Keratinocyte;Keratinocyte;Keratinocyte;Keratinocyte;Keratinocyte
chr1	200882036	200882236	Enhancer	KIF14;RP11;DDX59;CAMSAP2;RPL34P1;GPR25;C1orf106;PKP1;LAD1;PHLDA3;CSRP1;RP11	Keratinocyte;Keratinocyte;Keratinocyte;Keratinocyte;Keratinocyte;Keratinocyte;Keratinocyte;Keratinocyte;Keratinocyte;Keratinocyte;Keratinocyte;Keratinocyte
chr1	201096233	201096433	Enhancer	CAMSAP2;RPL34P1;TMEM9;PKP1;TNNT2;LAD1;TNNI1;RP11;PHLDA3;RP11;CSRP1;RPS10P7;RP11	Keratinocyte;Keratinocyte;Keratinocyte;Keratinocyte;Keratinocyte;Keratinocyte;Keratinocyte;Keratinocyte;Keratinocyte;Keratinocyte;Keratinocyte;Keratinocyte;Keratinocyte
chr1	201257678	201257878	Enhancer	CAMSAP2;RPL34P1;C1orf106;TMEM9;PKP1;TNNT2;LAD1;TNNI1;RP11;PHLDA3;RP11;CSRP1;RPS10P7;RP11;NAV1;IPO9	Keratinocyte;Keratinocyte;Keratinocyte;Keratinocyte;Keratinocyte;Keratinocyte;Keratinocyte;Keratinocyte;Keratinocyte;Keratinocyte;Keratinocyte;Keratinocyte;Keratinocyte;Keratinocyte;Keratinocyte;Keratinocyte
chr1	201363711	201363911	Enhancer	CAMSAP2;RPL34P1;KIF21B;TMEM9;PKP1;TNNT2;LAD1;TNNI1;RP11;PHLDA3;RP11;CSRP1;RPS10P7;RP11;NAV1;IPO9;IPO9	Keratinocyte;Keratinocyte;Keratinocyte;Keratinocyte;Keratinocyte;Keratinocyte;Keratinocyte;Keratinocyte;Keratinocyte;Keratinocyte;Keratinocyte;Keratinocyte;Keratinocyte;Keratinocyte;Keratinocyte;Keratinocyte;Keratinocyte
chr1	201435563	201435763	Enhancer	TNNI1;RP11;PHLDA3;RP11;CSRP1;RPS10P7;RP11;NAV1;RP11;MIR1231;IPO9;IPO9;RNPEP;RPL34P1;TMEM9;PKP1;TNNT2;LAD1	HUVEC,Keratinocyte;HUVEC,Keratinocyte;HUVEC,Keratinocyte;HUVEC,Keratinocyte;HUVEC,Keratinocyte;HUVEC,Keratinocyte;HUVEC,Keratinocyte;HUVEC;HUVEC,Keratinocyte;HUVEC;HUVEC,Keratinocyte;HUVEC,Keratinocyte;HUVEC;Keratinocyte;Keratinocyte;Keratinocyte;Keratinocyte;Keratinocyte
chr1	201437198	201437398	Enhancer	RPL34P1;TMEM9;PKP1;TNNT2;LAD1;TNNI1;RP11;PHLDA3;RP11;CSRP1;RPS10P7;RP11;IPO9;IPO9;TIMM17A	Keratinocyte;Keratinocyte;Keratinocyte;Keratinocyte;Keratinocyte;Keratinocyte;Keratinocyte;Keratinocyte;Keratinocyte;Keratinocyte;Keratinocyte;Keratinocyte;Keratinocyte;Keratinocyte;Keratinocyte
chr1	201619800	201620000	Enhancer	TMEM9;PKP1;LAD1;RP11;NAV1;IPO9;IPO9;SHISA4;TIMM17A;RP11;RNPEP	Keratinocyte;Keratinocyte;Keratinocyte;Keratinocyte;Keratinocyte;Keratinocyte;Keratinocyte;Keratinocyte;Keratinocyte;Keratinocyte;Keratinocyte
chr1	201665322	201665522	Enhancer	TMEM9;PKP1;LAD1;RP11;NAV1;IPO9;IPO9;SHISA4;TIMM17A;RP11;RNPEP	Keratinocyte;Keratinocyte;Keratinocyte;Keratinocyte;Keratinocyte;Keratinocyte;Keratinocyte;Keratinocyte;Keratinocyte;Keratinocyte;Keratinocyte
chr1	201710959	201711159	Enhancer	TMEM9;PKP1;LAD1;RP11;PHLDA3;RP11;CSRP1;RPS10P7;RP11;NAV1;IPO9;IPO9;SHISA4;TIMM17A;RP11;RNPEP;ARL8A;PTPN7;PTPRVP	Keratinocyte;Keratinocyte;Keratinocyte;Keratinocyte;Keratinocyte;Keratinocyte;Keratinocyte;Keratinocyte;Keratinocyte;Keratinocyte;Keratinocyte;Keratinocyte;Keratinocyte;Keratinocyte;Keratinocyte;Keratinocyte;Keratinocyte;Keratinocyte;Keratinocyte
chr1	202026069	202026269	Enhancer	RP11;NAV1;IPO9;IPO9;SHISA4;TIMM17A;RP11;RNPEP;RP11;ARL8A;RP11;RP11	Keratinocyte;Keratinocyte;Keratinocyte;Keratinocyte;Keratinocyte;Keratinocyte;Keratinocyte;Keratinocyte;Keratinocyte;Keratinocyte;Keratinocyte;Keratinocyte
chr1	202026224	202026424	Enhancer	RP11;NAV1;IPO9;IPO9;SHISA4;TIMM17A;RP11;RNPEP;RP11;ARL8A;RP11;RP11	Keratinocyte;Keratinocyte;Keratinocyte;Keratinocyte;Keratinocyte;Keratinocyte;Keratinocyte;Keratinocyte;Keratinocyte;Keratinocyte;Keratinocyte;Keratinocyte
chr1	202055110	202055310	Enhancer	PHLDA3;CSRP1;RP11;IPO9;IPO9;SHISA4;TIMM17A;RP11;RNPEP;RP11;ARL8A;RP11;RP11	Keratinocyte;Keratinocyte;Keratinocyte;Keratinocyte;Keratinocyte;Keratinocyte;Keratinocyte;Keratinocyte;Keratinocyte;Keratinocyte;Keratinocyte;Keratinocyte;Keratinocyte
chr1	202081833	202082033	Enhancer	PHLDA3;CSRP1;RP11;IPO9;IPO9;SHISA4;LMOD1;TIMM17A;RP11;RNPEP;RP11;ARL8A;UBE2T;RP11;RP11	Keratinocyte;Keratinocyte;Keratinocyte;Keratinocyte;Keratinocyte;Keratinocyte;Keratinocyte;Keratinocyte;Keratinocyte;Keratinocyte;Keratinocyte;Keratinocyte;Keratinocyte;Keratinocyte;Keratinocyte
chr1	202102320	202102520	Enhancer	CSRP1;RP11;IPO9;IPO9;SHISA4;TIMM17A;RP11;RNPEP;ELF3;RP11;ARL8A;PTPN7;PTPRVP;UBE2T;RP11;RP11	Keratinocyte;Keratinocyte;Keratinocyte;Keratinocyte;Keratinocyte;Keratinocyte;Keratinocyte;Keratinocyte;Keratinocyte;Keratinocyte;Keratinocyte;Keratinocyte;Keratinocyte;Keratinocyte;Keratinocyte;Keratinocyte
chr1	202251808	202252008	Enhancer	IPO9;TIMM17A;RP11;RNPEP;ELF3;RP11;RP11;RP11;RP11	Keratinocyte;Keratinocyte;Keratinocyte;Keratinocyte;Keratinocyte;Keratinocyte;Keratinocyte;Keratinocyte;Keratinocyte
chr1	202924193	202924393	Enhancer	RP11;RP11;KDM5B;KDM5B;RP11;RP11;RP11;RABIF;RP11;KLHL12;ADIPOR1;CYB5R1;TMEM183A;PPFIA4;RP11;BTG2;RP11	Keratinocyte;Keratinocyte;Keratinocyte;Keratinocyte;Keratinocyte;Keratinocyte;Keratinocyte;Keratinocyte;Keratinocyte;Keratinocyte;Keratinocyte;Keratinocyte;Keratinocyte;Keratinocyte;Keratinocyte;Keratinocyte;Keratinocyte
chr1	202925271	202925471	Enhancer	RP11;RP11;KDM5B;KDM5B;RP11;RP11;RP11;RABIF;RP11;KLHL12;ADIPOR1;CYB5R1;TMEM183A;PPFIA4;ADORA1;CHI3L1;RP11;BTG2;RP11	Keratinocyte;Keratinocyte;Keratinocyte;Keratinocyte;Keratinocyte;Keratinocyte;Keratinocyte;Keratinocyte;Keratinocyte;Keratinocyte;Keratinocyte;Keratinocyte;Keratinocyte;Keratinocyte;Keratinocyte;Keratinocyte;Keratinocyte;Keratinocyte;Keratinocyte
chr1	202934434	202934634	Enhancer	RP11;RP11;KDM5B;KDM5B;RP11;RP11;RP11;RP11;RABIF;RP11;KLHL12;ADIPOR1;CYB5R1;TMEM183A;RP11	Keratinocyte;Keratinocyte;Keratinocyte;Keratinocyte;Keratinocyte;Keratinocyte;Keratinocyte;Keratinocyte;Keratinocyte;Keratinocyte;Keratinocyte;Keratinocyte;Keratinocyte;Keratinocyte;Keratinocyte
chr1	202935583	202935783	Enhancer	RP11;RP11;RP11;KDM5B;KDM5B;RP11;RP11;RP11;RP11;RABIF;RP11;KLHL12;ADIPOR1;CYB5R1;TMEM183A;PPFIA4	Keratinocyte;Keratinocyte;Keratinocyte;Keratinocyte;Keratinocyte;Keratinocyte;Keratinocyte;Keratinocyte;Keratinocyte;Keratinocyte;Keratinocyte;Keratinocyte;Keratinocyte;Keratinocyte;Keratinocyte;Keratinocyte
chr1	203605490	203605690	Enhancer	RP11;BTG2;RP11;ATP2B4;RP11;LAX1;ZC3H11A;ZBED6;RP11;RP11;SNRPE;RP11;CBX1P3;SOX13	Keratinocyte;Keratinocyte;Keratinocyte;Keratinocyte;Keratinocyte;Keratinocyte;Keratinocyte;Keratinocyte;Keratinocyte;Keratinocyte;Keratinocyte;Keratinocyte;Keratinocyte;Keratinocyte
chr1	203692917	203693117	Enhancer	BTG2;ATP2B4;RP11;SNORA77;LAX1;ZC3H11A;ZBED6;RP11;RP11;SNRPE;KRT8P29;RP11;CBX1P3;SOX13;RP11	HUVEC;HUVEC;HUVEC;HUVEC;HUVEC;HUVEC;HUVEC;HUVEC;HUVEC;HUVEC;HUVEC;HUVEC;HUVEC;HUVEC;HUVEC
chr1	203720308	203720508	Enhancer	RP11;BTG2;RP11;ATP2B4;RP11;ZC3H11A;ZBED6;RP11;RP11;SNRPE;RP11;SOX13;RP11;ETNK2	Keratinocyte;Keratinocyte;Keratinocyte;Keratinocyte;Keratinocyte;Keratinocyte;Keratinocyte;Keratinocyte;Keratinocyte;Keratinocyte;Keratinocyte;Keratinocyte;Keratinocyte;Keratinocyte
chr1	203723695	203723895	Enhancer	RP11;BTG2;RP11;ATP2B4;RP11;ZBED6;RP11;RP11;RP11;SOX13;RP11;ETNK2	Keratinocyte;Keratinocyte;Keratinocyte;Keratinocyte;Keratinocyte;Keratinocyte;Keratinocyte;Keratinocyte;Keratinocyte;Keratinocyte;Keratinocyte;Keratinocyte
chr1	204160706	204160906	Enhancer	SNRPE;SOX13;RP11;RP11;ETNK2;KISS1;GOLT1A;RP11	HUVEC;HUVEC;HUVEC;HUVEC;HUVEC;HUVEC;HUVEC;HUVEC
chr1	204160841	204161041	Enhancer	SNRPE;SOX13;RP11;RP11;ETNK2;KISS1;GOLT1A;RP11	HUVEC;HUVEC;HUVEC;HUVEC;HUVEC;HUVEC;HUVEC;HUVEC
chr1	204258111	204258311	Enhancer	RP11;RP11;RP11;RP11;PIK3C2B;MDM4;RP11	Keratinocyte;Keratinocyte;Keratinocyte;Keratinocyte;Keratinocyte;Keratinocyte;Keratinocyte
chr1	204270442	204270642	Enhancer	RP11;RP11;MDM4;RP11	Keratinocyte;Keratinocyte;Keratinocyte;Keratinocyte
chr1	204400785	204400985	Enhancer	SOX13;RP11;PLEKHA6;RP11;RP11;PPP1R15B;PIK3C2B;MDM4;RP11;RP11	HUVEC;HUVEC;HUVEC;HUVEC;HUVEC;HUVEC;HUVEC;HUVEC;HUVEC;HUVEC
chr1	204407694	204407894	Enhancer	SOX13;RP11;PPP1R15B;PIK3C2B;MDM4;RP11	Keratinocyte;Keratinocyte;Keratinocyte;Keratinocyte;Keratinocyte;Keratinocyte
chr1	204412269	204412469	Enhancer	ZBED6;SNRPE;SOX13;KISS1;GOLT1A;RP11;PLEKHA6;RP11;RP11;PPP1R15B;PIK3C2B;MDM4;RP11;RP11;NFASC;LRRN2	HUVEC;HUVEC;HUVEC;HUVEC;HUVEC;HUVEC,Keratinocyte;HUVEC,Keratinocyte;HUVEC,Keratinocyte;HUVEC,Keratinocyte;HUVEC,Keratinocyte;HUVEC,Keratinocyte;HUVEC,Keratinocyte;HUVEC,Keratinocyte;HUVEC,Keratinocyte;HUVEC;Keratinocyte
chr1	204413150	204413350	Enhancer	RP11;PLEKHA6;PPP1R15B;RP11	Keratinocyte;Keratinocyte;Keratinocyte;Keratinocyte
chr1	204413432	204413632	Enhancer	RP11;PLEKHA6;PPP1R15B;RP11	Keratinocyte;Keratinocyte;Keratinocyte;Keratinocyte
chr1	204494393	204494593	Enhancer	RP11;PPP1R15B;PIK3C2B;MDM4;RP11;RP11	Keratinocyte;Keratinocyte;Keratinocyte;Keratinocyte;Keratinocyte;Keratinocyte
chr1	204972718	204972918	Enhancer	RBBP5	HUVEC
chr1	205447271	205447471	Enhancer	RBBP5;RP11;NUCKS1	Keratinocyte;Keratinocyte;Keratinocyte
chr1	205631717	205631917	Enhancer	SNRPGP10;CDK18;MFSD4;U6;RP11;ELK4;SLC45A3;SNORA72;NUCKS1;RAB7L1;SLC41A1;PM20D1	HUVEC;HUVEC;HUVEC;HUVEC;HUVEC;HUVEC;HUVEC;HUVEC;HUVEC;HUVEC;HUVEC;HUVEC
chr1	205631762	205631962	Enhancer	SNRPGP10;CDK18;MFSD4;U6;RP11;ELK4;SLC45A3;SNORA72;NUCKS1;RAB7L1;SLC41A1;PM20D1	HUVEC;HUVEC;HUVEC;HUVEC;HUVEC;HUVEC;HUVEC;HUVEC;HUVEC;HUVEC;HUVEC;HUVEC
chr1	205631878	205632078	Enhancer	SNRPGP10;CDK18;MFSD4;U6;RP11;ELK4;SLC45A3;SNORA72;NUCKS1;RAB7L1;SLC41A1;PM20D1	HUVEC;HUVEC;HUVEC;HUVEC;HUVEC;HUVEC;HUVEC;HUVEC;HUVEC;HUVEC;HUVEC;HUVEC
chr1	205631952	205632152	Enhancer	SNRPGP10;CDK18;MFSD4;U6;RP11;ELK4;SLC45A3;SNORA72;NUCKS1;RAB7L1;SLC41A1;PM20D1	HUVEC;HUVEC;HUVEC;HUVEC;HUVEC;HUVEC;HUVEC;HUVEC;HUVEC;HUVEC;HUVEC;HUVEC
chr1	206299288	206299488	Enhancer	IKBKE;RP11	Keratinocyte;Keratinocyte
chr1	207135183	207135383	Enhancer	RP11;C1orf116;YOD1	Keratinocyte;Keratinocyte;Keratinocyte
chr1	207200920	207201120	Enhancer	RP11;EIF2D;DYRK3;MAPKAPK2;RP11;IL20;IL24;RP11;FAIM3;C1orf116;PFKFB2;YOD1;C4BPB;CD55	Keratinocyte;Keratinocyte;Keratinocyte;Keratinocyte;Keratinocyte;Keratinocyte;Keratinocyte;Keratinocyte;Keratinocyte;Keratinocyte;Keratinocyte;Keratinocyte;Keratinocyte;Keratinocyte
chr1	207566898	207567098	Enhancer	RP11;C1orf116;PFKFB2	Keratinocyte;Keratinocyte;Keratinocyte
chr1	207963439	207963639	Enhancer	CD46P1;CD46;RP11;C1orf132	Keratinocyte;Keratinocyte;Keratinocyte;Keratinocyte
chr1	208340195	208340395	Enhancer	CD46;PLXNA2;RP11	Keratinocyte;Keratinocyte;Keratinocyte
chr1	208351168	208351368	Enhancer	PLXNA2;RP11	Keratinocyte;Keratinocyte
chr1	208357918	208358118	Enhancer	PLXNA2	Keratinocyte
chr1	208382086	208382286	Enhancer	CD46;PLXNA2	Keratinocyte;Keratinocyte
chr1	209439737	209439937	Enhancer	RP11;ATP5G2P1;MIR205HG;RP1;LAMB3;G0S2;HSD11B1;ADORA2BP;TRAF3IP3;C1orf74;RP3;IRF6;DIEXF;SYT14	Keratinocyte;Keratinocyte;Keratinocyte;Keratinocyte;Keratinocyte;Keratinocyte;Keratinocyte;Keratinocyte;Keratinocyte;Keratinocyte;Keratinocyte;Keratinocyte;Keratinocyte;Keratinocyte
chr1	209538132	209538332	Enhancer	RP11;RP11;MIR205HG;RP1;CAMK1G;LAMB3;G0S2;HSD11B1;ADORA2BP;TRAF3IP3;C1orf74;RP3;IRF6;DIEXF;SYT14	Keratinocyte;Keratinocyte;Keratinocyte;Keratinocyte;Keratinocyte;Keratinocyte;Keratinocyte;Keratinocyte;Keratinocyte;Keratinocyte;Keratinocyte;Keratinocyte;Keratinocyte;Keratinocyte;Keratinocyte
chr1	209540793	209540993	Enhancer	RP11;MIR205HG;RP1;CAMK1G;LAMB3;G0S2;HSD11B1;ADORA2BP;TRAF3IP3;C1orf74;RP3;IRF6;DIEXF;SYT14	Keratinocyte;Keratinocyte;Keratinocyte;Keratinocyte;Keratinocyte;Keratinocyte;Keratinocyte;Keratinocyte;Keratinocyte;Keratinocyte;Keratinocyte;Keratinocyte;Keratinocyte;Keratinocyte
chr1	209540839	209541039	Enhancer	RP11;MIR205HG;RP1;CAMK1G;LAMB3;G0S2;HSD11B1;ADORA2BP;TRAF3IP3;C1orf74;RP3;IRF6;DIEXF;SYT14	Keratinocyte;Keratinocyte;Keratinocyte;Keratinocyte;Keratinocyte;Keratinocyte;Keratinocyte;Keratinocyte;Keratinocyte;Keratinocyte;Keratinocyte;Keratinocyte;Keratinocyte;Keratinocyte
chr1	209540899	209541099	Enhancer	RP11;MIR205HG;RP1;CAMK1G;LAMB3;G0S2;HSD11B1;ADORA2BP;TRAF3IP3;C1orf74;RP3;IRF6;DIEXF;SYT14	Keratinocyte;Keratinocyte;Keratinocyte;Keratinocyte;Keratinocyte;Keratinocyte;Keratinocyte;Keratinocyte;Keratinocyte;Keratinocyte;Keratinocyte;Keratinocyte;Keratinocyte;Keratinocyte
chr1	209543880	209544080	Enhancer	RP11;ATP5G2P1;RP11;MIR205HG;RP1;CAMK1G;LAMB3;G0S2;HSD11B1;ADORA2BP;TRAF3IP3;C1orf74;RP3;IRF6;DIEXF;SYT14	Keratinocyte;Keratinocyte;Keratinocyte;Keratinocyte;Keratinocyte;Keratinocyte;Keratinocyte;Keratinocyte;Keratinocyte;Keratinocyte;Keratinocyte;Keratinocyte;Keratinocyte;Keratinocyte;Keratinocyte;Keratinocyte
chr1	209544020	209544220	Enhancer	RP11;ATP5G2P1;RP11;MIR205HG;RP1;CAMK1G;LAMB3;G0S2;HSD11B1;ADORA2BP;TRAF3IP3;C1orf74;RP3;IRF6;DIEXF;SYT14	Keratinocyte;Keratinocyte;Keratinocyte;Keratinocyte;Keratinocyte;Keratinocyte;Keratinocyte;Keratinocyte;Keratinocyte;Keratinocyte;Keratinocyte;Keratinocyte;Keratinocyte;Keratinocyte;Keratinocyte;Keratinocyte
chr1	209557927	209558127	Enhancer	RP11;ATP5G2P1;RP11;MIR205HG;RP1;CAMK1G;LAMB3;G0S2;HSD11B1;ADORA2BP;TRAF3IP3;C1orf74;RP3;IRF6;DIEXF;SYT14	Keratinocyte;Keratinocyte;Keratinocyte;Keratinocyte;Keratinocyte;Keratinocyte;Keratinocyte;Keratinocyte;Keratinocyte;Keratinocyte;Keratinocyte;Keratinocyte;Keratinocyte;Keratinocyte;Keratinocyte;Keratinocyte
chr1	209588258	209588458	Enhancer	RP11;ATP5G2P1;MIR205HG;RP1;CAMK1G;LAMB3;G0S2;HSD11B1;ADORA2BP;TRAF3IP3;C1orf74;RP3;IRF6;DIEXF	Keratinocyte;Keratinocyte;Keratinocyte;Keratinocyte;Keratinocyte;Keratinocyte;Keratinocyte;Keratinocyte;Keratinocyte;Keratinocyte;Keratinocyte;Keratinocyte;Keratinocyte;Keratinocyte
chr1	209658394	209658594	Enhancer	RP11;ATP5G2P1;MIR205HG;LAMB3;G0S2;HSD11B1;TRAF3IP3;C1orf74;RP3;IRF6;DIEXF;SYT14	Keratinocyte;Keratinocyte;Keratinocyte;Keratinocyte;Keratinocyte;Keratinocyte;Keratinocyte;Keratinocyte;Keratinocyte;Keratinocyte;Keratinocyte;Keratinocyte
chr1	209976182	209976382	Enhancer	RP11;ATP5G2P1;RP11;MIR205HG;RP1;CAMK1G;LAMB3;G0S2;HSD11B1;ADORA2BP;TRAF3IP3;C1orf74;RP3;IRF6;DIEXF;SYT14	Keratinocyte;Keratinocyte;Keratinocyte;Keratinocyte;Keratinocyte;Keratinocyte;Keratinocyte;Keratinocyte;Keratinocyte;Keratinocyte;Keratinocyte;Keratinocyte;Keratinocyte;Keratinocyte;Keratinocyte;Keratinocyte
chr1	209978297	209978497	Enhancer	RP11;ATP5G2P1;RP11;MIR205HG;RP1;CAMK1G;LAMB3;G0S2;HSD11B1;ADORA2BP;TRAF3IP3;C1orf74;RP3;IRF6;DIEXF;SYT14	Keratinocyte;Keratinocyte;Keratinocyte;Keratinocyte;Keratinocyte;Keratinocyte;Keratinocyte;Keratinocyte;Keratinocyte;Keratinocyte;Keratinocyte;Keratinocyte;Keratinocyte;Keratinocyte;Keratinocyte;Keratinocyte
chr1	209978696	209978896	Enhancer	RP11;ATP5G2P1;RP11;MIR205HG;RP1;CAMK1G;LAMB3;G0S2;HSD11B1;ADORA2BP;TRAF3IP3;C1orf74;RP3;IRF6;DIEXF;SYT14	Keratinocyte;Keratinocyte;Keratinocyte;Keratinocyte;Keratinocyte;Keratinocyte;Keratinocyte;Keratinocyte;Keratinocyte;Keratinocyte;Keratinocyte;Keratinocyte;Keratinocyte;Keratinocyte;Keratinocyte;Keratinocyte
chr1	209989346	209989546	Enhancer	RP11;ATP5G2P1;RP11;MIR205HG;CAMK1G;LAMB3;G0S2;HSD11B1;ADORA2BP;TRAF3IP3;C1orf74;RP3;IRF6;DIEXF;ST13P19	Keratinocyte;Keratinocyte;Keratinocyte;Keratinocyte;Keratinocyte;Keratinocyte;Keratinocyte;Keratinocyte;Keratinocyte;Keratinocyte;Keratinocyte;Keratinocyte;Keratinocyte;Keratinocyte;Keratinocyte
chr1	210043598	210043798	Enhancer	RP11;ATP5G2P1;MIR205HG;RP1;CAMK1G;LAMB3;G0S2;HSD11B1;ADORA2BP;TRAF3IP3;C1orf74;RP3;IRF6;DIEXF	Keratinocyte;Keratinocyte;Keratinocyte;Keratinocyte;Keratinocyte;Keratinocyte;Keratinocyte;Keratinocyte;Keratinocyte;Keratinocyte;Keratinocyte;Keratinocyte;Keratinocyte;Keratinocyte
chr1	210431311	210431511	Enhancer	C1orf133;ST13P19	Keratinocyte;Keratinocyte
chr1	211722000	211722200	Enhancer	RP11;RP11;RCOR3;SNX25P1;SLC30A1;LPGAT1	Keratinocyte;Keratinocyte;Keratinocyte;Keratinocyte;Keratinocyte;Keratinocyte
chr1	211776821	211777021	Enhancer	RP11;RCOR3;SNX25P1;FDPSP8	Keratinocyte;Keratinocyte;Keratinocyte;Keratinocyte
chr1	211909205	211909405	Enhancer	SNX25P1;ARPC3P2;DTL;RP11	Keratinocyte;Keratinocyte;Keratinocyte;Keratinocyte
chr1	212098478	212098678	Enhancer	SLC30A1;FDPSP8;RP11;PPP2R5A;RP11	Keratinocyte;Keratinocyte;Keratinocyte;Keratinocyte;Keratinocyte
chr1	212330540	212330740	Enhancer	LPGAT1;RP11;TMEM206;NENF;ATF3	Keratinocyte;Keratinocyte;Keratinocyte;Keratinocyte;Keratinocyte
chr1	212352989	212353189	Enhancer	LPGAT1;ATF3	Keratinocyte;Keratinocyte
chr1	212640488	212640688	Enhancer	RP11;TMEM206;NENF	Keratinocyte;Keratinocyte;Keratinocyte
chr1	212640495	212640695	Enhancer	RP11;TMEM206;NENF	Keratinocyte;Keratinocyte;Keratinocyte
chr1	212640698	212640898	Enhancer	RP11;TMEM206;NENF	Keratinocyte;Keratinocyte;Keratinocyte
chr1	212640795	212640995	Enhancer	RP11;TMEM206;NENF	Keratinocyte;Keratinocyte;Keratinocyte
chr1	212643421	212643621	Enhancer	PPP2R5A;RP11;RP11;TMEM206;NENF	Keratinocyte;Keratinocyte;Keratinocyte;Keratinocyte;Keratinocyte
chr1	212643522	212643722	Enhancer	PPP2R5A;RP11;RP11;TMEM206;NENF	Keratinocyte;Keratinocyte;Keratinocyte;Keratinocyte;Keratinocyte
chr1	214588893	214589093	Enhancer	SMYD2;RP11;RP11;PTPN14;CENPF;FAM108A4P	Keratinocyte;Keratinocyte;Keratinocyte;Keratinocyte;Keratinocyte;Keratinocyte
chr1	214613632	214613832	Enhancer	SMYD2;RP11;RP11;KRT18P12;PTPN14;CENPF;FAM108A4P	Keratinocyte;Keratinocyte;Keratinocyte;Keratinocyte;Keratinocyte;Keratinocyte;Keratinocyte
chr1	214648747	214648947	Enhancer	SMYD2;RP11;KRT18P12;PTPN14;CENPF;FAM108A4P	Keratinocyte;Keratinocyte;Keratinocyte;Keratinocyte;Keratinocyte;Keratinocyte
chr1	214650125	214650325	Enhancer	SMYD2;RP11;KRT18P12;PTPN14;CENPF;FAM108A4P	Keratinocyte;Keratinocyte;Keratinocyte;Keratinocyte;Keratinocyte;Keratinocyte
chr1	214680147	214680347	Enhancer	SMYD2;RP11;KRT18P12;PTPN14;CENPF;FAM108A4P	Keratinocyte;Keratinocyte;Keratinocyte;Keratinocyte;Keratinocyte;Keratinocyte
chr1	214720705	214720905	Enhancer	SMYD2;RP11;KRT18P12;PTPN14;CENPF;FAM108A4P	Keratinocyte;Keratinocyte;Keratinocyte;Keratinocyte;Keratinocyte;Keratinocyte
chr1	214722852	214723052	Enhancer	SMYD2;RP11;KRT18P12;PTPN14;CENPF;FAM108A4P	Keratinocyte;Keratinocyte;Keratinocyte;Keratinocyte;Keratinocyte;Keratinocyte
chr1	214746840	214747040	Enhancer	SMYD2;RP11;KRT18P12;PTPN14;CENPF;FAM108A4P	Keratinocyte;Keratinocyte;Keratinocyte;Keratinocyte;Keratinocyte;Keratinocyte
chr1	218553860	218554060	Enhancer	RRP15;RP11;RP11;TGFB2	Keratinocyte;Keratinocyte;Keratinocyte;Keratinocyte
chr1	222927756	222927956	Enhancer	MIA3;RP11;BROX;AIDA	Keratinocyte;Keratinocyte;Keratinocyte;Keratinocyte
chr1	223308524	223308724	Enhancer	TLR5;RP11	Keratinocyte;Keratinocyte
chr1	223308837	223309037	Enhancer	TLR5;RP11	Keratinocyte;Keratinocyte
chr1	223314505	223314705	Enhancer	TLR5;RP11	Keratinocyte;Keratinocyte
chr1	223314688	223314888	Enhancer	TLR5;RP11	Keratinocyte;Keratinocyte
chr1	224399241	224399441	Enhancer	SNRPEP10;CAPN2;TP53BP2;PHBP11;ACTBP11;RP11;RP11;RP11;RP11;FBXO28;RP11;DEGS1;RP11;RP11;RP11;NVL;CNIH4;CNIH3;WDR26;AKR1B1P1	Keratinocyte;Keratinocyte;Keratinocyte;Keratinocyte;Keratinocyte;Keratinocyte;Keratinocyte;Keratinocyte;Keratinocyte;Keratinocyte;Keratinocyte;Keratinocyte;Keratinocyte;Keratinocyte;Keratinocyte;Keratinocyte;Keratinocyte;Keratinocyte;Keratinocyte;Keratinocyte
chr1	224480148	224480348	Enhancer	CAPN2;PHBP11;ACTBP11;RP11;RP11;RP11;FBXO28;RP11;DEGS1;RP11;RP11;RP11;NVL;CNIH4;CNIH3;WDR26;AKR1B1P1	Keratinocyte;Keratinocyte;Keratinocyte;Keratinocyte;Keratinocyte;Keratinocyte;Keratinocyte;Keratinocyte;Keratinocyte;Keratinocyte;Keratinocyte;Keratinocyte;Keratinocyte;Keratinocyte;Keratinocyte;Keratinocyte;Keratinocyte
chr1	225637086	225637286	Enhancer	LBR;ENAH;SRP9	Keratinocyte;Keratinocyte;Keratinocyte
chr1	225696224	225696424	Enhancer	AC092811.1;LBR;ENAH;SRP9;PYCR2	Keratinocyte;Keratinocyte;Keratinocyte;Keratinocyte;Keratinocyte
chr1	226103262	226103462	Enhancer	TMEM63A;PYCR2;RP4;C1orf55;H3F3A;RP11;RP11;ACBD3	Keratinocyte;Keratinocyte;Keratinocyte;Keratinocyte;Keratinocyte;Keratinocyte;Keratinocyte;Keratinocyte
chr1	226271699	226271899	Enhancer	SRP9;RP11;TMEM63A;PYCR2;RP4;C1orf55;H3F3A;RP11;RP11;ACBD3;RP11;LIN9;PARP1;RP11	Keratinocyte;Keratinocyte;Keratinocyte;Keratinocyte;Keratinocyte;Keratinocyte;Keratinocyte;Keratinocyte;Keratinocyte;Keratinocyte;Keratinocyte;Keratinocyte;Keratinocyte;Keratinocyte
chr1	227128874	227129074	Enhancer	RP5	Keratinocyte
chr1	228361541	228361741	Enhancer	WNT9A;RP11;WNT3A;ARF1;C1orf35;MRPL55;RP5;GUK1;GJC2;C1orf148;IBA57;OBSCN;C1orf145	Keratinocyte;Keratinocyte;Keratinocyte;Keratinocyte;Keratinocyte;Keratinocyte;Keratinocyte;Keratinocyte;Keratinocyte;Keratinocyte;Keratinocyte;Keratinocyte;Keratinocyte
chr1	228362133	228362333	Enhancer	WNT9A;RP11;WNT3A;ARF1;C1orf35;MRPL55;RP5;GUK1;GJC2;C1orf148;IBA57;OBSCN;C1orf145	Keratinocyte;Keratinocyte;Keratinocyte;Keratinocyte;Keratinocyte;Keratinocyte;Keratinocyte;Keratinocyte;Keratinocyte;Keratinocyte;Keratinocyte;Keratinocyte;Keratinocyte
chr1	228362343	228362543	Enhancer	WNT9A;RP11;WNT3A;ARF1;C1orf35;MRPL55;RP5;GUK1;GJC2;C1orf148;IBA57;OBSCN;C1orf145	Keratinocyte;Keratinocyte;Keratinocyte;Keratinocyte;Keratinocyte;Keratinocyte;Keratinocyte;Keratinocyte;Keratinocyte;Keratinocyte;Keratinocyte;Keratinocyte;Keratinocyte
chr1	229205974	229206174	Enhancer	ISCA1P2;ACTA1	Keratinocyte;Keratinocyte
chr1	229206173	229206373	Enhancer	ISCA1P2;ACTA1	Keratinocyte;Keratinocyte
chr1	229229412	229229612	Enhancer	ISCA1P2;ACTA1;NUP133	Keratinocyte;Keratinocyte;Keratinocyte
chr1	230495701	230495901	Enhancer	GALNT2	Keratinocyte
chr1	230559731	230559931	Enhancer	GALNT2;PGBD5	Keratinocyte;Keratinocyte
chr1	231152266	231152466	Enhancer	COG2;TTC13;ARV1;RP11;FAM89A;EGLN1	Keratinocyte;Keratinocyte;Keratinocyte;Keratinocyte;Keratinocyte;Keratinocyte
chr1	231337108	231337308	Enhancer	C1orf131;GNPAT;C1orf124;EXOC8;EGLN1;TSNAX;RP11	HUVEC;HUVEC;HUVEC;HUVEC;HUVEC;HUVEC;HUVEC
chr1	231543378	231543578	Enhancer	ARV1;C1orf124;EXOC8;EGLN1;RP11;DISC1	Keratinocyte;Keratinocyte;Keratinocyte;Keratinocyte;Keratinocyte;Keratinocyte
chr1	231643528	231643728	Enhancer	TSNAX;RP11	Keratinocyte;Keratinocyte
chr1	231643570	231643770	Enhancer	TSNAX;RP11	Keratinocyte;Keratinocyte
chr1	233234422	233234622	Enhancer	PCNXL2	Keratinocyte
chr1	233679778	233679978	Enhancer	RPS7P3;RP11;SLC35F3	Keratinocyte;Keratinocyte;Keratinocyte
chr1	233763801	233764001	Enhancer	RPS7P3;PCNXL2;RP5;KCNK1;RP11;SLC35F3	Keratinocyte;Keratinocyte;Keratinocyte;Keratinocyte;Keratinocyte;Keratinocyte
chr1	233792017	233792217	Enhancer	RPS7P3;PCNXL2;RP5;KCNK1;RP11;SLC35F3	Keratinocyte;Keratinocyte;Keratinocyte;Keratinocyte;Keratinocyte;Keratinocyte
chr1	234698347	234698547	Enhancer	RP5	Keratinocyte
chr1	234791453	234791653	Enhancer	RP4;RP4;RP4;RBM34	Keratinocyte;Keratinocyte;Keratinocyte;Keratinocyte
chr1	234797741	234797941	Enhancer	RP5;C1orf31;IRF2BP2;LINC00184;RP4;RP4;RP4	Keratinocyte;Keratinocyte;Keratinocyte;Keratinocyte;Keratinocyte;Keratinocyte;Keratinocyte
chr1	234835523	234835723	Enhancer	RP5;C1orf31;IRF2BP2;RP4;RP4	Keratinocyte;Keratinocyte;Keratinocyte;Keratinocyte;Keratinocyte
chr1	234844871	234845071	Enhancer	RP5;C1orf31;RP4;RP4;RP4	Keratinocyte;Keratinocyte;Keratinocyte;Keratinocyte;Keratinocyte
chr1	234844879	234845079	Enhancer	RP5;C1orf31;RP4;RP4;RP4	Keratinocyte;Keratinocyte;Keratinocyte;Keratinocyte;Keratinocyte
chr1	234844892	234845092	Enhancer	RP5;C1orf31;RP4;RP4;RP4	Keratinocyte;Keratinocyte;Keratinocyte;Keratinocyte;Keratinocyte
chr1	235022452	235022652	Enhancer	RP5;C1orf31;IRF2BP2	Keratinocyte;Keratinocyte;Keratinocyte
chr1	235154187	235154387	Enhancer	IRF2BP2	Keratinocyte
chr1	235664339	235664539	Enhancer	TBCE;RP11;B3GALNT2;MTND5P19;MTND4P10;LDHAP2;LYST	Keratinocyte;Keratinocyte;Keratinocyte;Keratinocyte;Keratinocyte;Keratinocyte;Keratinocyte
chr1	235664691	235664891	Enhancer	TBCE;RP11;B3GALNT2;MTND5P19;MTND4P10;LDHAP2;LYST	Keratinocyte;Keratinocyte;Keratinocyte;Keratinocyte;Keratinocyte;Keratinocyte;Keratinocyte
chr1	235665722	235665922	Enhancer	TOMM20;RBM34;RPL23AP23;AL391994.1;GGPS1;ARID4B;RP11;TBCE;RP11;RP11;B3GALNT2;MTND5P19;MTND4P10;LYST	Keratinocyte;Keratinocyte;Keratinocyte;Keratinocyte;Keratinocyte;Keratinocyte;Keratinocyte;Keratinocyte;Keratinocyte;Keratinocyte;Keratinocyte;Keratinocyte;Keratinocyte;Keratinocyte
chr1	236066440	236066640	Enhancer	B3GALNT2;LDHAP2;LYST;LYST;RP4;RP11;ENO1P1;LGALS8	Keratinocyte;Keratinocyte;Keratinocyte;Keratinocyte;Keratinocyte;Keratinocyte;Keratinocyte;Keratinocyte
chr1	236066469	236066669	Enhancer	B3GALNT2;LDHAP2;LYST;LYST;RP4;RP11;ENO1P1;LGALS8	Keratinocyte;Keratinocyte;Keratinocyte;Keratinocyte;Keratinocyte;Keratinocyte;Keratinocyte;Keratinocyte
chr1	236307994	236308194	Enhancer	LDHAP2;LYST;RP4;GPR137B;RP11;ENO1P1;LGALS8;RP11;HEATR1	Keratinocyte;Keratinocyte;Keratinocyte;Keratinocyte;Keratinocyte;Keratinocyte;Keratinocyte;Keratinocyte;Keratinocyte
chr1	236629447	236629647	Enhancer	LYST;RP4;GPR137B;ERO1LB;RP11;EDARADD;ENO1P1;LGALS8;LGALS8;RP11;HEATR1;RP11	Keratinocyte;Keratinocyte;Keratinocyte;Keratinocyte;Keratinocyte;Keratinocyte;Keratinocyte;Keratinocyte;Keratinocyte;Keratinocyte;Keratinocyte;Keratinocyte
chr1	236963608	236963808	Enhancer	ENO1P1;MTR;RP11	Keratinocyte;Keratinocyte;Keratinocyte
chr1	241746158	241746358	Enhancer	CHML;RP11;CFL1P4	Keratinocyte;Keratinocyte;Keratinocyte
chr1	243650963	243651163	Enhancer	RP11;CEP170;SDCCAG8;RP11	Keratinocyte;Keratinocyte;Keratinocyte;Keratinocyte
chr1	243651246	243651446	Enhancer	RP11;CEP170;SDCCAG8;RP11	Keratinocyte;Keratinocyte;Keratinocyte;Keratinocyte
chr1	243651428	243651628	Enhancer	RP11;CEP170;SDCCAG8;RP11	Keratinocyte;Keratinocyte;Keratinocyte;Keratinocyte
chr1	244402593	244402793	Enhancer	PPPDE1	Keratinocyte
chr1	244608307	244608507	Enhancer	TGIF2P1;RP11;ADSS;C1orf101;COX20;HNRNPU;HNRNPU	Keratinocyte;Keratinocyte;Keratinocyte;Keratinocyte;Keratinocyte;Keratinocyte;Keratinocyte
chr1	246666855	246667055	Enhancer	SMYD3;TFB2M;CNST;RP11	Keratinocyte;Keratinocyte;Keratinocyte;Keratinocyte
chr1	246931796	246931996	Enhancer	SCCPDH;RP11;RP11	HUVEC;HUVEC,Keratinocyte;HUVEC,Keratinocyte
chr1	246932746	246932946	Enhancer	SCCPDH;RP11;RP11	HUVEC;HUVEC,Keratinocyte;HUVEC,Keratinocyte
chr1	246958762	246958962	Enhancer	SMYD3;TFB2M;CNST;RP11;RP11;RP11;RP11;RP11	Keratinocyte;Keratinocyte;Keratinocyte;Keratinocyte;Keratinocyte;Keratinocyte;Keratinocyte;Keratinocyte
chr1	246958857	246959057	Enhancer	SMYD3;TFB2M;CNST;RP11;RP11;RP11;RP11;RP11	Keratinocyte;Keratinocyte;Keratinocyte;Keratinocyte;Keratinocyte;Keratinocyte;Keratinocyte;Keratinocyte
chr1	246959050	246959250	Enhancer	SMYD3;TFB2M;CNST;RP11;RP11;RP11;RP11;RP11	Keratinocyte;Keratinocyte;Keratinocyte;Keratinocyte;Keratinocyte;Keratinocyte;Keratinocyte;Keratinocyte
chr1	246964697	246964897	Enhancer	SMYD3;TFB2M;CNST;SCCPDH;RP11;RP11;RP11;RP11;RP11	Keratinocyte;Keratinocyte;Keratinocyte;Keratinocyte;Keratinocyte;Keratinocyte;Keratinocyte;Keratinocyte;Keratinocyte
chr2	42868	43068	Enhancer	FAM110C	Keratinocyte
chr2	43853	44053	Enhancer	FAM110C	Keratinocyte
chr2	675821	676021	Enhancer	TMEM18	HUVEC
chr2	676033	676233	Enhancer	TMEM18	HUVEC
chr2	676123	676323	Enhancer	TMEM18	HUVEC
chr2	1628949	1629149	Enhancer	PXDN	Keratinocyte
chr2	3353093	3353293	Enhancer	TSSC1;TRAPPC12;AC108488.3;RNASEH1;RPS7;TMSB4XP2	Keratinocyte;Keratinocyte;Keratinocyte;Keratinocyte;Keratinocyte;Keratinocyte
chr2	9353101	9353301	Enhancer	KIDINS220;MBOAT2;RP11;ASAP2;RP11;ITGB1BP1;CPSF3;IAH1;ADAM17;YWHAQ	Keratinocyte;Keratinocyte;Keratinocyte;Keratinocyte;Keratinocyte;Keratinocyte;Keratinocyte;Keratinocyte;Keratinocyte;Keratinocyte
chr2	9375470	9375670	Enhancer	SNRPEP5;KIDINS220;MBOAT2;RP11;ASAP2;RP11;ITGB1BP1;CPSF3;IAH1;ADAM17;YWHAQ	Keratinocyte;Keratinocyte;Keratinocyte;Keratinocyte;Keratinocyte;Keratinocyte;Keratinocyte;Keratinocyte;Keratinocyte;Keratinocyte;Keratinocyte
chr2	9455891	9456091	Enhancer	MBOAT2;RP11;ASAP2;RP11;ITGB1BP1;CPSF3;IAH1;ADAM17;YWHAQ	Keratinocyte;Keratinocyte;Keratinocyte;Keratinocyte;Keratinocyte;Keratinocyte;Keratinocyte;Keratinocyte;Keratinocyte
chr2	9784198	9784398	Enhancer	ASAP2;RP11;ITGB1BP1;CPSF3;IAH1;ADAM17;YWHAQ;KLF11	Keratinocyte;Keratinocyte;Keratinocyte;Keratinocyte;Keratinocyte;Keratinocyte;Keratinocyte;Keratinocyte
chr2	9784700	9784900	Enhancer	ASAP2;RP11;ITGB1BP1;CPSF3;IAH1;ADAM17;YWHAQ;KLF11	Keratinocyte;Keratinocyte;Keratinocyte;Keratinocyte;Keratinocyte;Keratinocyte;Keratinocyte;Keratinocyte
chr2	9814245	9814445	Enhancer	ASAP2;RP11;ITGB1BP1;CPSF3;IAH1;ADAM17;YWHAQ;KLF11;RRM2	Keratinocyte;Keratinocyte;Keratinocyte;Keratinocyte;Keratinocyte;Keratinocyte;Keratinocyte;Keratinocyte;Keratinocyte
chr2	9815526	9815726	Enhancer	ASAP2;RP11;ITGB1BP1;CPSF3;IAH1;ADAM17;KLF11;RRM2	Keratinocyte;Keratinocyte;Keratinocyte;Keratinocyte;Keratinocyte;Keratinocyte;Keratinocyte;Keratinocyte
chr2	9905956	9906156	Enhancer	ASAP2;RP11;ITGB1BP1;CPSF3;IAH1;ADAM17;KLF11;RRM2	Keratinocyte;Keratinocyte;Keratinocyte;Keratinocyte;Keratinocyte;Keratinocyte;Keratinocyte;Keratinocyte
chr2	9960483	9960683	Enhancer	ASAP2;RP11;ITGB1BP1;CPSF3;IAH1;ADAM17;TAF1B;KLF11;RRM2;ODC1	Keratinocyte;Keratinocyte;Keratinocyte;Keratinocyte;Keratinocyte;Keratinocyte;Keratinocyte;Keratinocyte;Keratinocyte;Keratinocyte
chr2	9960673	9960873	Enhancer	ASAP2;RP11;ITGB1BP1;CPSF3;IAH1;ADAM17;TAF1B;KLF11;RRM2;ODC1	Keratinocyte;Keratinocyte;Keratinocyte;Keratinocyte;Keratinocyte;Keratinocyte;Keratinocyte;Keratinocyte;Keratinocyte;Keratinocyte
chr2	9960799	9960999	Enhancer	ASAP2;RP11;ITGB1BP1;CPSF3;IAH1;ADAM17;TAF1B;KLF11;RRM2;ODC1	Keratinocyte;Keratinocyte;Keratinocyte;Keratinocyte;Keratinocyte;Keratinocyte;Keratinocyte;Keratinocyte;Keratinocyte;Keratinocyte
chr2	10116631	10116831	Enhancer	ITGB1BP1;IAH1;ADAM17;YWHAQ;TAF1B;GRHL1;RP11;KLF11;CYS1;HPCAL1	Keratinocyte;Keratinocyte;Keratinocyte;Keratinocyte;Keratinocyte;Keratinocyte;Keratinocyte;Keratinocyte;Keratinocyte;Keratinocyte
chr2	10348971	10349171	Enhancer	PDIA6	Keratinocyte
chr2	10529803	10530003	Enhancer	ODC1;RP11;NOL10;AC092687.1;ATP6V1C2;PDIA6	Keratinocyte;Keratinocyte;Keratinocyte;Keratinocyte;Keratinocyte;Keratinocyte
chr2	10598406	10598606	Enhancer	KLF11;HPCAL1;ODC1;RP11;NOL10;AC092687.1;ATP6V1C2;PDIA6	Keratinocyte;Keratinocyte;Keratinocyte;Keratinocyte;Keratinocyte;Keratinocyte;Keratinocyte;Keratinocyte
chr2	10637874	10638074	Enhancer	RRM2;HPCAL1;ODC1;AC092687.5;PDIA6	Keratinocyte;Keratinocyte;Keratinocyte;Keratinocyte;Keratinocyte
chr2	10654937	10655137	Enhancer	RRM2;HPCAL1;ODC1;AC092687.5;PDIA6	Keratinocyte;Keratinocyte;Keratinocyte;Keratinocyte;Keratinocyte
chr2	10738321	10738521	Enhancer	HPCAL1;ODC1;AC092687.5;NOL10;PDIA6	Keratinocyte;Keratinocyte;Keratinocyte;Keratinocyte;Keratinocyte
chr2	11280691	11280891	Enhancer	AC018463.4;ROCK2	HUVEC;HUVEC
chr2	15477987	15478187	Enhancer	RP11;DDX1	Keratinocyte;Keratinocyte
chr2	17761727	17761927	Enhancer	PSMC1P10;RAD51AP2;VSNL1;GEN1;SMC6;KCNS3	Keratinocyte;Keratinocyte;Keratinocyte;Keratinocyte;Keratinocyte;Keratinocyte
chr2	18465505	18465705	Enhancer	RDH14	Keratinocyte
chr2	18481176	18481376	Enhancer	RDH14	Keratinocyte
chr2	19995960	19996160	Enhancer	CISD1P1;LAPTM4A;AC098828.3;SDC1;AC007041.2;PUM2;RHOB;HS1BP3	Keratinocyte;Keratinocyte;Keratinocyte;Keratinocyte;Keratinocyte;Keratinocyte;Keratinocyte;Keratinocyte
chr2	20266004	20266204	Enhancer	CISD1P1;AC013400.2;TTC32;WDR35;AC079145.4;MATN3;LAPTM4A;AC098828.3;SDC1;AC007041.2;PUM2;RHOB;HS1BP3;C2orf43	Keratinocyte;Keratinocyte;Keratinocyte;Keratinocyte;Keratinocyte;Keratinocyte;Keratinocyte;Keratinocyte;Keratinocyte;Keratinocyte;Keratinocyte;Keratinocyte;Keratinocyte;Keratinocyte
chr2	20313499	20313699	Enhancer	CISD1P1;TTC32;WDR35;MATN3;LAPTM4A;AC098828.3;SDC1;AC007041.2;PUM2;RHOB;HS1BP3;C2orf43	Keratinocyte;Keratinocyte;Keratinocyte;Keratinocyte;Keratinocyte;Keratinocyte;Keratinocyte;Keratinocyte;Keratinocyte;Keratinocyte;Keratinocyte;Keratinocyte
chr2	20324949	20325149	Enhancer	CISD1P1;TTC32;WDR35;LAPTM4A;AC098828.3;SDC1;AC007041.2;PUM2;RHOB;HS1BP3;C2orf43	Keratinocyte;Keratinocyte;Keratinocyte;Keratinocyte;Keratinocyte;Keratinocyte;Keratinocyte;Keratinocyte;Keratinocyte;Keratinocyte;Keratinocyte
chr2	20371871	20372071	Enhancer	CISD1P1;TTC32;WDR35;LAPTM4A;AC098828.3;SDC1;AC007041.2;PUM2;RHOB;HS1BP3;C2orf43	Keratinocyte;Keratinocyte;Keratinocyte;Keratinocyte;Keratinocyte;Keratinocyte;Keratinocyte;Keratinocyte;Keratinocyte;Keratinocyte;Keratinocyte
chr2	20396250	20396450	Enhancer	CISD1P1;TTC32;WDR35;LAPTM4A;AC098828.3;SDC1;AC007041.2;PUM2;RHOB;HS1BP3	Keratinocyte;Keratinocyte;Keratinocyte;Keratinocyte;Keratinocyte;Keratinocyte;Keratinocyte;Keratinocyte;Keratinocyte;Keratinocyte
chr2	20398258	20398458	Enhancer	CISD1P1;TTC32;WDR35;LAPTM4A;AC098828.3;SDC1;AC007041.2;PUM2;RHOB;HS1BP3;C2orf43	Keratinocyte;Keratinocyte;Keratinocyte;Keratinocyte;Keratinocyte;Keratinocyte;Keratinocyte;Keratinocyte;Keratinocyte;Keratinocyte;Keratinocyte
chr2	20407871	20408071	Enhancer	CISD1P1;AC013400.2;TTC32;WDR35;AC079145.4;MATN3;LAPTM4A;AC098828.3;SDC1;AC007041.2;PUM2;RHOB;HS1BP3	Keratinocyte;Keratinocyte;Keratinocyte;Keratinocyte;Keratinocyte;Keratinocyte;Keratinocyte;Keratinocyte;Keratinocyte;Keratinocyte;Keratinocyte;Keratinocyte;Keratinocyte
chr2	20409163	20409363	Enhancer	CISD1P1;AC013400.2;TTC32;WDR35;AC079145.4;MATN3;LAPTM4A;AC098828.3;SDC1;AC007041.2;PUM2;RHOB;HS1BP3	Keratinocyte;Keratinocyte;Keratinocyte;Keratinocyte;Keratinocyte;Keratinocyte;Keratinocyte;Keratinocyte;Keratinocyte;Keratinocyte;Keratinocyte;Keratinocyte;Keratinocyte
chr2	20417433	20417633	Enhancer	CISD1P1;AC013400.2;TTC32;WDR35;AC079145.4;MATN3;LAPTM4A;AC098828.3;SDC1;AC007041.2;PUM2;RHOB;HS1BP3;C2orf43	Keratinocyte;Keratinocyte;Keratinocyte;Keratinocyte;Keratinocyte;Keratinocyte;Keratinocyte;Keratinocyte;Keratinocyte;Keratinocyte;Keratinocyte;Keratinocyte;Keratinocyte;Keratinocyte
chr2	20435787	20435987	Enhancer	CISD1P1;AC013400.2;TTC32;WDR35;AC079145.4;MATN3;LAPTM4A;AC098828.3;SDC1;AC007041.2;PUM2;RHOB;HS1BP3	Keratinocyte;Keratinocyte;Keratinocyte;Keratinocyte;Keratinocyte;Keratinocyte;Keratinocyte;Keratinocyte;Keratinocyte;Keratinocyte;Keratinocyte;Keratinocyte;Keratinocyte
chr2	20436422	20436622	Enhancer	CISD1P1;AC013400.2;TTC32;WDR35;AC079145.4;MATN3;LAPTM4A;AC098828.3;SDC1;AC007041.2;PUM2;RHOB;HS1BP3	Keratinocyte;Keratinocyte;Keratinocyte;Keratinocyte;Keratinocyte;Keratinocyte;Keratinocyte;Keratinocyte;Keratinocyte;Keratinocyte;Keratinocyte;Keratinocyte;Keratinocyte
chr2	20488828	20489028	Enhancer	CISD1P1;AC013400.2;TTC32;WDR35;AC079145.4;MATN3;LAPTM4A;AC098828.3;SDC1;AC007041.2;PUM2;RHOB;HS1BP3	Keratinocyte;Keratinocyte;Keratinocyte;Keratinocyte;Keratinocyte;Keratinocyte;Keratinocyte;Keratinocyte;Keratinocyte;Keratinocyte;Keratinocyte;Keratinocyte;Keratinocyte
chr2	20570168	20570368	Enhancer	CISD1P1;TTC32;WDR35;AC079145.4;MATN3;LAPTM4A;AC098828.3;SDC1;PUM2;HS1BP3	Keratinocyte;Keratinocyte;Keratinocyte;Keratinocyte;Keratinocyte;Keratinocyte;Keratinocyte;Keratinocyte;Keratinocyte;Keratinocyte
chr2	20702449	20702649	Enhancer	TTC32;WDR35;LAPTM4A;AC098828.3;SDC1;AC007041.2;PUM2;RHOB;HS1BP3	Keratinocyte;Keratinocyte;Keratinocyte;Keratinocyte;Keratinocyte;Keratinocyte;Keratinocyte;Keratinocyte;Keratinocyte
chr2	20709854	20710054	Enhancer	TTC32;WDR35;AC079145.4;LAPTM4A;AC098828.3;SDC1;AC007041.2;PUM2;RHOB	Keratinocyte;Keratinocyte;Keratinocyte;Keratinocyte;Keratinocyte;Keratinocyte;Keratinocyte;Keratinocyte;Keratinocyte
chr2	23715893	23716093	Enhancer	KLHL29;AC011239.1	Keratinocyte;Keratinocyte
chr2	23746826	23747026	Enhancer	KLHL29;UBXN2A	Keratinocyte;Keratinocyte
chr2	23747244	23747444	Enhancer	KLHL29;UBXN2A	Keratinocyte;Keratinocyte
chr2	23748004	23748204	Enhancer	KLHL29;UBXN2A	Keratinocyte;Keratinocyte
chr2	23748143	23748343	Enhancer	KLHL29;UBXN2A	Keratinocyte;Keratinocyte
chr2	24306395	24306595	Enhancer	MFSD2B;C2orf44;FKBP1B;AC008073.5;AC008073.6;TP53I3;AC009228.1	HUVEC;HUVEC;HUVEC;HUVEC;HUVEC;HUVEC;HUVEC
chr2	24526992	24527192	Enhancer	HMGN2P20;RP11;ITSN2	Keratinocyte;Keratinocyte;Keratinocyte
chr2	25486630	25486830	Enhancer	ADCY3;SUCLA2P3;AC104699.1;DTNB	Keratinocyte;Keratinocyte;Keratinocyte;Keratinocyte
chr2	25596589	25596789	Enhancer	AC012074.1;AC104699.1;DTNB;TPM3P7;RAB10	Keratinocyte;Keratinocyte;Keratinocyte;Keratinocyte;Keratinocyte
chr2	25600652	25600852	Enhancer	DNMT3A;AC012074.1	Keratinocyte;Keratinocyte
chr2	25842077	25842277	Enhancer	DTNB;TPM3P7;PTGES3P2;AC010150.1;ASXL2;KIF3C;RAB10;HADHB;HADHA	Keratinocyte;Keratinocyte;Keratinocyte;Keratinocyte;Keratinocyte;Keratinocyte;Keratinocyte;Keratinocyte;Keratinocyte
chr2	26515444	26515644	Enhancer	AC010150.1;ASXL2;KIF3C;RAB10;RP11;AC011742.3;SMARCE1P6;FAM59B;HADHB;HADHA;EPT1;GPR113;AC015977.5	Keratinocyte;Keratinocyte;Keratinocyte;Keratinocyte;Keratinocyte;Keratinocyte;Keratinocyte;Keratinocyte;Keratinocyte;Keratinocyte;Keratinocyte;Keratinocyte;Keratinocyte
chr2	26829672	26829872	Enhancer	RAB10;HADHB;HADHA;EPT1;GPR113	Keratinocyte;Keratinocyte;Keratinocyte;Keratinocyte;Keratinocyte
chr2	27668715	27668915	Enhancer	EIF2B4;SNX17;FTH1P3;PPM1G;NRBP1;KRTCAP3;IFT172	Keratinocyte;Keratinocyte;Keratinocyte;Keratinocyte;Keratinocyte;Keratinocyte;Keratinocyte
chr2	28291060	28291260	Enhancer	CCDC121;SLC4A1AP;SUPT7L;MRPL33;BRE;AC093690.1;FOSL2;PLB1	Keratinocyte;Keratinocyte;Keratinocyte;Keratinocyte;Keratinocyte;Keratinocyte;Keratinocyte;Keratinocyte
chr2	28408163	28408363	Enhancer	MRPL33;BRE;AC093690.1;FOSL2;AC104695.4;PLB1;PPP1CB	Keratinocyte;Keratinocyte;Keratinocyte;Keratinocyte;Keratinocyte;Keratinocyte;Keratinocyte
chr2	28491846	28492046	Enhancer	BRE;RP11;AC093690.1;FOSL2;AC104695.3;PLB1;PPP1CB	Keratinocyte;Keratinocyte;Keratinocyte;Keratinocyte;Keratinocyte;Keratinocyte;Keratinocyte
chr2	28492316	28492516	Enhancer	BRE;RP11;AC093690.1;FOSL2;AC104695.3;PLB1;PPP1CB	Keratinocyte;Keratinocyte;Keratinocyte;Keratinocyte;Keratinocyte;Keratinocyte;Keratinocyte
chr2	28519934	28520134	Enhancer	MRPL33;BRE;RBKS;RP11;AC093690.1;FOSL2;AC104695.3;PLB1;PPP1CB;TRMT61B	Keratinocyte;Keratinocyte;Keratinocyte;Keratinocyte;Keratinocyte;Keratinocyte;Keratinocyte;Keratinocyte;Keratinocyte;Keratinocyte
chr2	28770452	28770652	Enhancer	AC093690.1;FOSL2;PLB1;PPP1CB;SPDYA;TRMT61B;WDR43;CLIP4	Keratinocyte;Keratinocyte;Keratinocyte;Keratinocyte;Keratinocyte;Keratinocyte;Keratinocyte;Keratinocyte
chr2	28837134	28837334	Enhancer	RP11;AC093690.1;FOSL2;AC104695.3;PPP1CB;SPDYA;TRMT61B;WDR43;CLIP4	Keratinocyte;Keratinocyte;Keratinocyte;Keratinocyte;Keratinocyte;Keratinocyte;Keratinocyte;Keratinocyte;Keratinocyte
chr2	28877784	28877984	Enhancer	AC093690.1;FOSL2;PLB1;PPP1CB;SPDYA;TRMT61B;WDR43;C2orf71;CLIP4	Keratinocyte;Keratinocyte;Keratinocyte;Keratinocyte;Keratinocyte;Keratinocyte;Keratinocyte;Keratinocyte;Keratinocyte
chr2	28890174	28890374	Enhancer	AC093690.1;FOSL2;PLB1;PPP1CB;SPDYA;TRMT61B;WDR43;CLIP4	Keratinocyte;Keratinocyte;Keratinocyte;Keratinocyte;Keratinocyte;Keratinocyte;Keratinocyte;Keratinocyte
chr2	29150775	29150975	Enhancer	FOSL2;AC097724.3;PPP1CB;SPDYA;TRMT61B;WDR43;FAM179A;CLIP4	Keratinocyte;Keratinocyte;Keratinocyte;Keratinocyte;Keratinocyte;Keratinocyte;Keratinocyte;Keratinocyte
chr2	29291458	29291658	Enhancer	PPP1CB;SPDYA;TRMT61B;WDR43	Keratinocyte;Keratinocyte;Keratinocyte;Keratinocyte
chr2	29353414	29353614	Enhancer	PPP1CB;SPDYA;TRMT61B;WDR43;C2orf71;CLIP4	Keratinocyte;Keratinocyte;Keratinocyte;Keratinocyte;Keratinocyte;Keratinocyte
chr2	31475876	31476076	Enhancer	CAPN14;EHD3;XDH	Keratinocyte;Keratinocyte;Keratinocyte
chr2	31520067	31520267	Enhancer	CAPN14;EHD3;XDH	Keratinocyte;Keratinocyte;Keratinocyte
chr2	31526319	31526519	Enhancer	CAPN14;EHD3;XDH	Keratinocyte;Keratinocyte;Keratinocyte
chr2	33202422	33202622	Enhancer	LTBP1	Keratinocyte
chr2	36595492	36595692	Enhancer	AC009414.1;RP11;CRIM1;AC007401.2;FEZ2;VIT	Keratinocyte;Keratinocyte;Keratinocyte;Keratinocyte;Keratinocyte;Keratinocyte
chr2	36595795	36595995	Enhancer	AC009414.1;RP11;CRIM1;AC007401.2;FEZ2;VIT	Keratinocyte;Keratinocyte;Keratinocyte;Keratinocyte;Keratinocyte;Keratinocyte
chr2	36718072	36718272	Enhancer	AC009414.1;RP11;CRIM1;FEZ2;VIT	Keratinocyte;Keratinocyte;Keratinocyte;Keratinocyte;Keratinocyte
chr2	36806229	36806429	Enhancer	AC009414.1;RP11;CRIM1;AC007401.2	Keratinocyte;Keratinocyte;Keratinocyte;Keratinocyte
chr2	37916961	37917161	Enhancer	AC007390.5;QPCT;AC006369.2;CDC42EP3;AC010878.3	Keratinocyte;Keratinocyte;Keratinocyte;Keratinocyte;Keratinocyte
chr2	38014010	38014210	Enhancer	AC007390.5;QPCT;AC010878.3	Keratinocyte;Keratinocyte;Keratinocyte
chr2	38200911	38201111	Enhancer	FAM82A1	Keratinocyte
chr2	38200964	38201164	Enhancer	FAM82A1	Keratinocyte
chr2	38336799	38336999	Enhancer	AC010878.3;AC016689.1;CYP1B1;AC009229.6;AC009229.4;ATL2;RPLP0P6;SRSF7;GEMIN6	Keratinocyte;Keratinocyte;Keratinocyte;Keratinocyte;Keratinocyte;Keratinocyte;Keratinocyte;Keratinocyte;Keratinocyte
chr2	38336945	38337145	Enhancer	AC010878.3;AC016689.1;CYP1B1;AC009229.6;AC009229.4;ATL2;RPLP0P6;SRSF7;GEMIN6	Keratinocyte;Keratinocyte;Keratinocyte;Keratinocyte;Keratinocyte;Keratinocyte;Keratinocyte;Keratinocyte;Keratinocyte
chr2	38466792	38466992	Enhancer	FAM82A1;AC009229.4;RPLP0P6;AC016995.3;HNRPLL;GALM;SRSF7;GEMIN6	Keratinocyte;Keratinocyte;Keratinocyte;Keratinocyte;Keratinocyte;Keratinocyte;Keratinocyte;Keratinocyte
chr2	38466830	38467030	Enhancer	FAM82A1;AC009229.4;RPLP0P6;AC016995.3;HNRPLL;GALM;SRSF7;GEMIN6	Keratinocyte;Keratinocyte;Keratinocyte;Keratinocyte;Keratinocyte;Keratinocyte;Keratinocyte;Keratinocyte
chr2	38673871	38674071	Enhancer	AC010878.3;AC009229.4;AC009229.5;GAPDHP25;ATL2;RPLP0P6;AC016995.3;HNRPLL;GALM;SRSF7;GEMIN6;AC018693.5;ASS1P2	Keratinocyte;Keratinocyte;Keratinocyte;Keratinocyte;Keratinocyte;Keratinocyte;Keratinocyte;Keratinocyte;Keratinocyte;Keratinocyte;Keratinocyte;Keratinocyte;Keratinocyte
chr2	38919251	38919451	Enhancer	GAPDHP25;ATL2;RPLP0P6;GALM;SRSF7;GEMIN6;AC018693.5;ASS1P2	Keratinocyte;Keratinocyte;Keratinocyte;Keratinocyte;Keratinocyte;Keratinocyte;Keratinocyte;Keratinocyte
chr2	39970739	39970939	Enhancer	THUMPD2	Keratinocyte
chr2	42319271	42319471	Enhancer	AC083949.1;COX7A2L;AC025750.5;MTA3	Keratinocyte;Keratinocyte;Keratinocyte;Keratinocyte
chr2	42789598	42789798	Enhancer	EML4;AC083949.1;COX7A2L	Keratinocyte;Keratinocyte;Keratinocyte
chr2	42797315	42797515	Enhancer	MTA3;AC025750.7;U6;OXER1;HAAO;FTOP1;EML4;AC083949.1;COX7A2L;AC025750.5;ZFP36L2	HUVEC,Keratinocyte;HUVEC;HUVEC;HUVEC;HUVEC;HUVEC;Keratinocyte;Keratinocyte;Keratinocyte;Keratinocyte;Keratinocyte
chr2	43072832	43073032	Enhancer	AC025750.5;MTA3;AC098824.6;AC016735.2;ZFP36L2	Keratinocyte;Keratinocyte;Keratinocyte;Keratinocyte;Keratinocyte
chr2	43123852	43124052	Enhancer	AC025750.5;MTA3;AC098824.6;AC016735.2;ZFP36L2;AC010883.5	Keratinocyte;Keratinocyte;Keratinocyte;Keratinocyte;Keratinocyte;Keratinocyte
chr2	43238333	43238533	Enhancer	AC016735.2;AC016735.3;ZFP36L2;AC010883.5;THADA	Keratinocyte;Keratinocyte;Keratinocyte;Keratinocyte;Keratinocyte
chr2	43278452	43278652	Enhancer	AC025750.5;AC098824.6;AC016735.2;AC016735.3;ZFP36L2;AC010883.5	Keratinocyte;Keratinocyte;Keratinocyte;Keratinocyte;Keratinocyte;Keratinocyte
chr2	43302262	43302462	Enhancer	AC025750.5;AC098824.6;AC016735.2;ZFP36L2;AC010883.5	Keratinocyte;Keratinocyte;Keratinocyte;Keratinocyte;Keratinocyte
chr2	43302470	43302670	Enhancer	AC025750.5;AC098824.6;AC016735.2;ZFP36L2;AC010883.5	Keratinocyte;Keratinocyte;Keratinocyte;Keratinocyte;Keratinocyte
chr2	43387621	43387821	Enhancer	AC098824.6;ZFP36L2;AC010883.5	Keratinocyte;Keratinocyte;Keratinocyte
chr2	43408243	43408443	Enhancer	AC098824.6;AC016735.2;AC016735.3;AC093609.1;ZFP36L2;AC010883.5;THADA	Keratinocyte;Keratinocyte;Keratinocyte;Keratinocyte;Keratinocyte;Keratinocyte;Keratinocyte
chr2	43705528	43705728	Enhancer	AC098824.6;AC016735.2;ZFP36L2;THADA;DYNC2LI1	Keratinocyte;Keratinocyte;Keratinocyte;Keratinocyte;Keratinocyte
chr2	43746804	43747004	Enhancer	ZFP36L2;THADA;AC011242.5;DYNC2LI1	Keratinocyte;Keratinocyte;Keratinocyte;Keratinocyte
chr2	44552408	44552608	Enhancer	AC013717.3;SLC3A1;PREPL	HUVEC;HUVEC;HUVEC
chr2	46398748	46398948	Enhancer	AC017006.3;EPAS1;RHOQ;ATP6V1E2;CRIPT	Keratinocyte;Keratinocyte;Keratinocyte;Keratinocyte;Keratinocyte
chr2	46636709	46636909	Enhancer	RHOQ;ATP6V1E2;RP11;PIGF	Keratinocyte;Keratinocyte;Keratinocyte;Keratinocyte
chr2	47072680	47072880	Enhancer	RHOQ;ATP6V1E2;AC016722.1;AC016722.2;TTC7A;MCFD2;AC073283.7;CALM2	Keratinocyte;Keratinocyte;Keratinocyte;Keratinocyte;Keratinocyte;Keratinocyte;Keratinocyte;Keratinocyte
chr2	47074419	47074619	Enhancer	RHOQ;ATP6V1E2;AC016722.1;AC016722.2;TTC7A;MCFD2;AC073283.7;CALM2	Keratinocyte;Keratinocyte;Keratinocyte;Keratinocyte;Keratinocyte;Keratinocyte;Keratinocyte;Keratinocyte
chr2	47195458	47195658	Enhancer	RHOQ;ATP6V1E2;PIGF;SOCS5;RP11;AC016722.1;AC016722.2;AC016722.4;TTC7A;MCFD2;AC073283.7;CALM2;EPCAM;MSH2	Keratinocyte;Keratinocyte;Keratinocyte;Keratinocyte;Keratinocyte;Keratinocyte;Keratinocyte;Keratinocyte;Keratinocyte;Keratinocyte;Keratinocyte;Keratinocyte;Keratinocyte;Keratinocyte
chr2	47567813	47568013	Enhancer	TTC7A;MCFD2;BCYRN1;EPCAM;MSH2;KCNK12;AC079250.1;MSH6	Keratinocyte;Keratinocyte;Keratinocyte;Keratinocyte;Keratinocyte;Keratinocyte;Keratinocyte;Keratinocyte
chr2	47597231	47597431	Enhancer	MCFD2;BCYRN1;EPCAM;MSH2	Keratinocyte;Keratinocyte;Keratinocyte;Keratinocyte
chr2	54292698	54292898	Enhancer	CHAC2;ERLEC1;AC008280.5;AC008280.1;HMGB1P31;AC008280.3;SPTBN1	Keratinocyte;Keratinocyte;Keratinocyte;Keratinocyte;Keratinocyte;Keratinocyte;Keratinocyte
chr2	54349944	54350144	Enhancer	CHAC2;ERLEC1;AC008280.5;PSME4;AC008280.1;HMGB1P31;AC008280.3;ACYP2	Keratinocyte;Keratinocyte;Keratinocyte;Keratinocyte;Keratinocyte;Keratinocyte;Keratinocyte;Keratinocyte
chr2	54802804	54803004	Enhancer	SPTBN1;AC092839.1;AC093110.3;EML6;RTN4;RPS27A	Keratinocyte;Keratinocyte;Keratinocyte;Keratinocyte;Keratinocyte;Keratinocyte
chr2	54827485	54827685	Enhancer	C2orf73;SPTBN1;AC092839.1;AC093110.3;EML6;RTN4;RPS27A	Keratinocyte;Keratinocyte;Keratinocyte;Keratinocyte;Keratinocyte;Keratinocyte;Keratinocyte
chr2	55172892	55173092	Enhancer	SPTBN1;AC092839.1;AC093110.3;RTN4;AC012358.7;AC012358.4;RPS27A;C2orf63;MTIF2;PRORSD1P	Keratinocyte;Keratinocyte;Keratinocyte;Keratinocyte;Keratinocyte;Keratinocyte;Keratinocyte;Keratinocyte;Keratinocyte;Keratinocyte
chr2	55379623	55379823	Enhancer	RTN4;C2orf63;MTIF2;PRORSD1P;AC012358.8	Keratinocyte;Keratinocyte;Keratinocyte;Keratinocyte;Keratinocyte
chr2	55382086	55382286	Enhancer	RTN4	Keratinocyte
chr2	55988538	55988738	Enhancer	BTF3P5;CCDC104;EFEMP1	Keratinocyte;Keratinocyte;Keratinocyte
chr2	60598409	60598609	Enhancer	AC010733.5;PEX13	Keratinocyte;Keratinocyte
chr2	60739757	60739957	Enhancer	BCL11A	Keratinocyte
chr2	60760927	60761127	Enhancer	BCL11A;REL;AC010733.5	Keratinocyte;Keratinocyte;Keratinocyte
chr2	60771264	60771464	Enhancer	BCL11A;AC010733.5	Keratinocyte;Keratinocyte
chr2	61188705	61188905	Enhancer	NONOP2;AC010733.5;PEX13;KIAA1841	Keratinocyte;Keratinocyte;Keratinocyte;Keratinocyte
chr2	61407170	61407370	Enhancer	AHSA2	Keratinocyte
chr2	61407314	61407514	Enhancer	AHSA2	Keratinocyte
chr2	61898972	61899172	Enhancer	AC107081.5;COMMD1;CCT4	Keratinocyte;Keratinocyte;Keratinocyte
chr2	61997695	61997895	Enhancer	USP34;AC107081.5;COMMD1;CCT4;AC018462.3	Keratinocyte;Keratinocyte;Keratinocyte;Keratinocyte;Keratinocyte
chr2	64089954	64090154	Enhancer	MDH1;AC016734.2;AC016734.3;AC096664.1;AC096664.2;AC096664.3;WDPCP;UGP2;ACA59;VPS54;PELI1;LGALSL	Keratinocyte;Keratinocyte;Keratinocyte;Keratinocyte;Keratinocyte;Keratinocyte;Keratinocyte;Keratinocyte;Keratinocyte;Keratinocyte;Keratinocyte;Keratinocyte
chr2	64332107	64332307	Enhancer	UGP2;AC074289.1;PELI1;AC114752.2;LGALSL;AFTPH	Keratinocyte;Keratinocyte;Keratinocyte;Keratinocyte;Keratinocyte;Keratinocyte
chr2	64336009	64336209	Enhancer	AC096664.1;UGP2;ACA59;AC074289.1;PELI1;AC114752.2;LGALSL;AFTPH	Keratinocyte;Keratinocyte;Keratinocyte;Keratinocyte;Keratinocyte;Keratinocyte;Keratinocyte;Keratinocyte
chr2	64348145	64348345	Enhancer	MDH1;AC016734.2;AC096664.1;AC096664.2;WDPCP;UGP2;ACA59;VPS54;AC074289.1;PELI1;AC114752.2;LGALSL;AFTPH	Keratinocyte;Keratinocyte;Keratinocyte;Keratinocyte;Keratinocyte;Keratinocyte;Keratinocyte;Keratinocyte;Keratinocyte;Keratinocyte;Keratinocyte;Keratinocyte;Keratinocyte
chr2	64360123	64360323	Enhancer	MDH1;AC016734.2;AC096664.1;AC096664.2;WDPCP;UGP2;ACA59;VPS54;AC074289.1;PELI1;LGALSL;AFTPH	Keratinocyte;Keratinocyte;Keratinocyte;Keratinocyte;Keratinocyte;Keratinocyte;Keratinocyte;Keratinocyte;Keratinocyte;Keratinocyte;Keratinocyte;Keratinocyte
chr2	64365311	64365511	Enhancer	MDH1;AC016734.2;AC096664.1;AC096664.2;WDPCP;UGP2;ACA59;VPS54;AC074289.1;PELI1;LGALSL;AFTPH	Keratinocyte;Keratinocyte;Keratinocyte;Keratinocyte;Keratinocyte;Keratinocyte;Keratinocyte;Keratinocyte;Keratinocyte;Keratinocyte;Keratinocyte;Keratinocyte
chr2	64710144	64710344	Enhancer	UGP2;ACA59;AC008074.3;LGALSL;RP11;AFTPH	Keratinocyte;Keratinocyte;Keratinocyte;Keratinocyte;Keratinocyte;Keratinocyte
chr2	65014149	65014349	Enhancer	LGALSL;AFTPH;SERTAD2;RAB1A	Keratinocyte;Keratinocyte;Keratinocyte;Keratinocyte
chr2	65137614	65137814	Enhancer	AFTPH;RAB1A;AC007318.5;ACTR2	Keratinocyte;Keratinocyte;Keratinocyte;Keratinocyte
chr2	65296040	65296240	Enhancer	AC007365.4;SLC1A4;CEP68;RAB1A;SPRED2;AC007389.1	Keratinocyte;Keratinocyte;Keratinocyte;Keratinocyte;Keratinocyte;Keratinocyte
chr2	65543310	65543510	Enhancer	SLC1A4;CEP68;RAB1A;AC007318.5;ACTR2;SPRED2;AC074391.1;AC007389.1;AC007389.4	Keratinocyte;Keratinocyte;Keratinocyte;Keratinocyte;Keratinocyte;Keratinocyte;Keratinocyte;Keratinocyte;Keratinocyte
chr2	65615214	65615414	Enhancer	SLC1A4;CEP68;RAB1A;AC007318.5;ACTR2;SPRED2;AC074391.1;AC007389.1;AC007389.4	Keratinocyte;Keratinocyte;Keratinocyte;Keratinocyte;Keratinocyte;Keratinocyte;Keratinocyte;Keratinocyte;Keratinocyte
chr2	65615429	65615629	Enhancer	SLC1A4;CEP68;RAB1A;AC007318.5;ACTR2;SPRED2;AC074391.1;AC007389.1;AC007389.4	Keratinocyte;Keratinocyte;Keratinocyte;Keratinocyte;Keratinocyte;Keratinocyte;Keratinocyte;Keratinocyte;Keratinocyte
chr2	65793862	65794062	Enhancer	RAB1A;AC007318.5;ACTR2;AC007389.3	Keratinocyte;Keratinocyte;Keratinocyte;Keratinocyte
chr2	65839277	65839477	Enhancer	RAB1A;AC007318.5;ACTR2;AC007389.3	Keratinocyte;Keratinocyte;Keratinocyte;Keratinocyte
chr2	66010139	66010339	Enhancer	AC007318.5;ACTR2;SPRED2	Keratinocyte;Keratinocyte;Keratinocyte
chr2	67673717	67673917	Enhancer	ETAA1	Keratinocyte
chr2	67678706	67678906	Enhancer	ETAA1	Keratinocyte
chr2	67691147	67691347	Enhancer	ETAA1	Keratinocyte
chr2	68107339	68107539	Enhancer	AC017083.2;PNO1	Keratinocyte;Keratinocyte
chr2	68225001	68225201	Enhancer	WDR92;PNO1;PPP3R1	Keratinocyte;Keratinocyte;Keratinocyte
chr2	68272922	68273122	Enhancer	AC079112.1;C1D;AC017083.2;WDR92;PNO1;PPP3R1	Keratinocyte;Keratinocyte;Keratinocyte;Keratinocyte;Keratinocyte;Keratinocyte
chr2	69026697	69026897	Enhancer	ARHGAP25;GKN2;ANTXR1	Keratinocyte;Keratinocyte;Keratinocyte
chr2	69411466	69411666	Enhancer	GKN1;ANTXR1;GFPT1;NFU1;RP11;ANXA4	Keratinocyte;Keratinocyte;Keratinocyte;Keratinocyte;Keratinocyte;Keratinocyte
chr2	69480591	69480791	Enhancer	ANTXR1;NFU1;RP11;ANXA4	Keratinocyte;Keratinocyte;Keratinocyte;Keratinocyte
chr2	69481108	69481308	Enhancer	ANTXR1;NFU1;RP11;ANXA4	Keratinocyte;Keratinocyte;Keratinocyte;Keratinocyte
chr2	69895042	69895242	Enhancer	GFPT1;RP11;AC092431.1;AAK1;ANXA4;GMCL1;SNRNP27;MXD1;ASPRV1;PCBP1;PCBP1;AC016700.4;AC016700.3;C2orf42;TIA1;PCYOX1;SNRPG	Keratinocyte;Keratinocyte;Keratinocyte;Keratinocyte;Keratinocyte;Keratinocyte;Keratinocyte;Keratinocyte;Keratinocyte;Keratinocyte;Keratinocyte;Keratinocyte;Keratinocyte;Keratinocyte;Keratinocyte;Keratinocyte;Keratinocyte
chr2	69969694	69969894	Enhancer	GFPT1;NFU1;AC114772.1;RP11;AC092431.2;AC092431.1;AAK1;ANXA4;GMCL1;SNRNP27;MXD1;ASPRV1;PCBP1;PCBP1;AC016700.4;AC016700.3;TIA1;PCYOX1;SNRPG	Keratinocyte;Keratinocyte;Keratinocyte;Keratinocyte;Keratinocyte;Keratinocyte;Keratinocyte;Keratinocyte;Keratinocyte;Keratinocyte;Keratinocyte;Keratinocyte;Keratinocyte;Keratinocyte;Keratinocyte;Keratinocyte;Keratinocyte;Keratinocyte;Keratinocyte
chr2	69970539	69970739	Enhancer	GFPT1;NFU1;AC114772.1;RP11;AC092431.2;AC092431.1;AAK1;ANXA4;GMCL1;SNRNP27;MXD1;ASPRV1;PCBP1;PCBP1;AC016700.4;AC016700.3;TIA1;PCYOX1;SNRPG	Keratinocyte;Keratinocyte;Keratinocyte;Keratinocyte;Keratinocyte;Keratinocyte;Keratinocyte;Keratinocyte;Keratinocyte;Keratinocyte;Keratinocyte;Keratinocyte;Keratinocyte;Keratinocyte;Keratinocyte;Keratinocyte;Keratinocyte;Keratinocyte;Keratinocyte
chr2	69990302	69990502	Enhancer	GFPT1;NFU1;AC114772.1;RP11;AC092431.2;AC092431.1;AAK1;ANXA4;GMCL1;SNRNP27;MXD1;ASPRV1;PCBP1;AC016700.4;AC016700.3;TIA1;PCYOX1;SNRPG	Keratinocyte;Keratinocyte;Keratinocyte;Keratinocyte;Keratinocyte;Keratinocyte;Keratinocyte;Keratinocyte;Keratinocyte;Keratinocyte;Keratinocyte;Keratinocyte;Keratinocyte;Keratinocyte;Keratinocyte;Keratinocyte;Keratinocyte;Keratinocyte
chr2	70006772	70006972	Enhancer	GFPT1;NFU1;AC114772.1;RP11;AC092431.2;AC092431.1;AAK1;ANXA4;GMCL1;SNRNP27;MXD1;ASPRV1;PCBP1;AC016700.4;AC016700.3;TIA1;PCYOX1;SNRPG	Keratinocyte;Keratinocyte;Keratinocyte;Keratinocyte;Keratinocyte;Keratinocyte;Keratinocyte;Keratinocyte;Keratinocyte;Keratinocyte;Keratinocyte;Keratinocyte;Keratinocyte;Keratinocyte;Keratinocyte;Keratinocyte;Keratinocyte;Keratinocyte
chr2	70122067	70122267	Enhancer	RP11;AC092431.2;AC092431.1;AAK1;ANXA4;GMCL1;SNRNP27;MXD1;ASPRV1;PCBP1;PCBP1;AC016700.4;AC016700.3;C2orf42;TIA1;PCYOX1;SNRPG;FAM136A	Keratinocyte;Keratinocyte;Keratinocyte;Keratinocyte;Keratinocyte;Keratinocyte;Keratinocyte;Keratinocyte;Keratinocyte;Keratinocyte;Keratinocyte;Keratinocyte;Keratinocyte;Keratinocyte;Keratinocyte;Keratinocyte;Keratinocyte;Keratinocyte
chr2	70205506	70205706	Enhancer	RP11;AC092431.2;AC092431.1;AAK1;ANXA4;GMCL1;SNRNP27;MXD1;ASPRV1;PCBP1;AC016700.4;AC016700.3;TIA1;PCYOX1;SNRPG;AC022201.5;FAM136A	Keratinocyte;Keratinocyte;Keratinocyte;Keratinocyte;Keratinocyte;Keratinocyte;Keratinocyte;Keratinocyte;Keratinocyte;Keratinocyte;Keratinocyte;Keratinocyte;Keratinocyte;Keratinocyte;Keratinocyte;Keratinocyte;Keratinocyte
chr2	70224944	70225144	Enhancer	RP11;AC092431.2;AC092431.1;AAK1;ANXA4;GMCL1;SNRNP27;MXD1;ASPRV1;AC016700.4;AC016700.3;TIA1;PCYOX1;SNRPG;AC022201.5;FAM136A	Keratinocyte;Keratinocyte;Keratinocyte;Keratinocyte;Keratinocyte;Keratinocyte;Keratinocyte;Keratinocyte;Keratinocyte;Keratinocyte;Keratinocyte;Keratinocyte;Keratinocyte;Keratinocyte;Keratinocyte;Keratinocyte
chr2	70556042	70556242	Enhancer	ANXA4;SNRNP27;MXD1;PCBP1;AC016700.4;AC016700.3;C2orf42;TIA1;PCYOX1;SNRPG;AC022201.5;TGFA;AC007395.4	Keratinocyte;Keratinocyte;Keratinocyte;Keratinocyte;Keratinocyte;Keratinocyte;Keratinocyte;Keratinocyte;Keratinocyte;Keratinocyte;Keratinocyte;Keratinocyte;Keratinocyte
chr2	70608970	70609170	Enhancer	ANXA4;ASPRV1;PCBP1;PCBP1;AC016700.4;AC016700.3;C2orf42;TIA1;PCYOX1;SNRPG;AC022201.5;TGFA;AC007395.4	Keratinocyte;Keratinocyte;Keratinocyte;Keratinocyte;Keratinocyte;Keratinocyte;Keratinocyte;Keratinocyte;Keratinocyte;Keratinocyte;Keratinocyte;Keratinocyte;Keratinocyte
chr2	70741860	70742060	Enhancer	PCBP1;PCBP1;AC016700.4;AC016700.3;C2orf42;TIA1;PCYOX1;SNRPG;AC022201.5;FAM136A;TGFA;AC007395.4;HMGN2P21	Keratinocyte;Keratinocyte;Keratinocyte;Keratinocyte;Keratinocyte;Keratinocyte;Keratinocyte;Keratinocyte;Keratinocyte;Keratinocyte;Keratinocyte;Keratinocyte;Keratinocyte
chr2	70823541	70823741	Enhancer	PCBP1;AC016700.4;AC016700.3;C2orf42;TIA1;PCYOX1;SNRPG;AC022201.5;FAM136A	Keratinocyte;Keratinocyte;Keratinocyte;Keratinocyte;Keratinocyte;Keratinocyte;Keratinocyte;Keratinocyte;Keratinocyte
chr2	70834350	70834550	Enhancer	PCBP1;AC016700.4;AC016700.3;C2orf42;TIA1;PCYOX1;SNRPG;AC022201.5;FAM136A;AC007395.4	Keratinocyte;Keratinocyte;Keratinocyte;Keratinocyte;Keratinocyte;Keratinocyte;Keratinocyte;Keratinocyte;Keratinocyte;Keratinocyte
chr2	72180062	72180262	Enhancer	AC067950.1	Keratinocyte
chr2	73016322	73016522	Enhancer	EXOC6B;SPR;RAB11FIP5;PRADC1	Keratinocyte;Keratinocyte;Keratinocyte;Keratinocyte
chr2	73052026	73052226	Enhancer	EXOC6B;SPR;RAB11FIP5;PRADC1;CCT7;FBXO41	Keratinocyte;Keratinocyte;Keratinocyte;Keratinocyte;Keratinocyte;Keratinocyte
chr2	74165992	74166192	Enhancer	TPRKB;DUSP11;STAMBP;ACTG2;DGUOK;DGUOK;AC073046.25;RP11;TET3;RP11;BOLA3;BOLA3;MOB1A;MTHFD2;SLC4A5;HMGA1P8;WDR54;RTKN;WBP1;MRPL53	Keratinocyte;Keratinocyte;Keratinocyte;Keratinocyte;Keratinocyte;Keratinocyte;Keratinocyte;Keratinocyte;Keratinocyte;Keratinocyte;Keratinocyte;Keratinocyte;Keratinocyte;Keratinocyte;Keratinocyte;Keratinocyte;Keratinocyte;Keratinocyte;Keratinocyte;Keratinocyte
chr2	74235968	74236168	Enhancer	TPRKB;DUSP11;STAMBP;ACTG2;DGUOK;DGUOK;AC073046.25;RP11;TET3;BOLA3;BOLA3;MOB1A;MTHFD2;DCTN1;HMGA1P8;C2orf81;WDR54;INO80B;MOGS	Keratinocyte;Keratinocyte;Keratinocyte;Keratinocyte;Keratinocyte;Keratinocyte;Keratinocyte;Keratinocyte;Keratinocyte;Keratinocyte;Keratinocyte;Keratinocyte;Keratinocyte;Keratinocyte;Keratinocyte;Keratinocyte;Keratinocyte;Keratinocyte;Keratinocyte
chr2	74237528	74237728	Enhancer	TPRKB;DUSP11;STAMBP;ACTG2;DGUOK;DGUOK;AC073046.25;RP11;TET3;BOLA3;BOLA3;MOB1A;MTHFD2;DCTN1;HMGA1P8;C2orf81;WDR54;INO80B;MOGS	Keratinocyte;Keratinocyte;Keratinocyte;Keratinocyte;Keratinocyte;Keratinocyte;Keratinocyte;Keratinocyte;Keratinocyte;Keratinocyte;Keratinocyte;Keratinocyte;Keratinocyte;Keratinocyte;Keratinocyte;Keratinocyte;Keratinocyte;Keratinocyte;Keratinocyte
chr2	74967590	74967790	Enhancer	DCTN1;HMGA1P8;WDR54;RTKN;INO80B;WBP1;MOGS;MRPL53;SEMA4F;POLE4	Keratinocyte;Keratinocyte;Keratinocyte;Keratinocyte;Keratinocyte;Keratinocyte;Keratinocyte;Keratinocyte;Keratinocyte;Keratinocyte
chr2	75829882	75830082	Enhancer	AC007099.1;FAM176A;AC005034.3;GCFC2	Keratinocyte;Keratinocyte;Keratinocyte;Keratinocyte
chr2	85625038	85625238	Enhancer	LDHAP7;TMSB10;C2orf89;AC022210.2;RETSAT;AC062037.1;CAPG;SH2D6;MAT2A;GGCX;VAMP8;VAMP5;RNF181;USP39;TMEM150A;C2orf68	Keratinocyte;Keratinocyte;Keratinocyte;Keratinocyte;Keratinocyte;Keratinocyte;Keratinocyte;Keratinocyte;Keratinocyte;Keratinocyte;Keratinocyte;Keratinocyte;Keratinocyte;Keratinocyte;Keratinocyte;Keratinocyte
chr2	85663560	85663760	Enhancer	TCF7L1;U6;AC093162.5;TGOLN2;ELMOD3;RETSAT;Y;AC062037.1;CAPG;SH2D6;GGCX;VAMP8;VAMP5;RNF181;USP39;TMEM150A;C2orf68;SFTPB	HUVEC;HUVEC;HUVEC;HUVEC;HUVEC;HUVEC;HUVEC;HUVEC;HUVEC;HUVEC;HUVEC;HUVEC;HUVEC;HUVEC;HUVEC;HUVEC;HUVEC;HUVEC
chr2	85696101	85696301	Enhancer	TMSB10;C2orf89;AC022210.2;AC011236.7;AC093162.5;TGOLN2;ELMOD3;RETSAT;AC062037.1;CAPG;GGCX;VAMP8;VAMP5;RNF181;USP39;TMEM150A;C2orf68;ST3GAL5	Keratinocyte;Keratinocyte;Keratinocyte;Keratinocyte;Keratinocyte;Keratinocyte;Keratinocyte;Keratinocyte;Keratinocyte;Keratinocyte;Keratinocyte;Keratinocyte;Keratinocyte;Keratinocyte;Keratinocyte;Keratinocyte;Keratinocyte;Keratinocyte
chr2	85732047	85732247	Enhancer	TMSB10;C2orf89;AC022210.2;AC011236.7;AC093162.5;TGOLN2;ELMOD3;RETSAT;AC062037.1;CAPG;MAT2A;GGCX;VAMP8;VAMP5;RNF181;USP39;TMEM150A;C2orf68	Keratinocyte;Keratinocyte;Keratinocyte;Keratinocyte;Keratinocyte;Keratinocyte;Keratinocyte;Keratinocyte;Keratinocyte;Keratinocyte;Keratinocyte;Keratinocyte;Keratinocyte;Keratinocyte;Keratinocyte;Keratinocyte;Keratinocyte;Keratinocyte
chr2	85805521	85805721	Enhancer	AC011236.7;TGOLN2;ELMOD3;RETSAT;AC062037.1;CAPG;SH2D6;MAT2A;GGCX;VAMP8;VAMP5;RNF181;USP39;TMEM150A;C2orf68;AC012454.4	Keratinocyte;Keratinocyte;Keratinocyte;Keratinocyte;Keratinocyte;Keratinocyte;Keratinocyte;Keratinocyte;Keratinocyte;Keratinocyte;Keratinocyte;Keratinocyte;Keratinocyte;Keratinocyte;Keratinocyte;Keratinocyte
chr2	86139593	86139793	Enhancer	POLR1A;PTCD3;MRPL35	Keratinocyte;Keratinocyte;Keratinocyte
chr2	86157852	86158052	Enhancer	MAT2A;GGCX;VAMP8;VAMP5;RNF181;USP39;TMEM150A;ST3GAL5;PTCD3;IMMT;MRPL35	Keratinocyte;Keratinocyte;Keratinocyte;Keratinocyte;Keratinocyte;Keratinocyte;Keratinocyte;Keratinocyte;Keratinocyte;Keratinocyte;Keratinocyte
chr2	86160943	86161143	Enhancer	RETSAT;CAPG;MAT2A;GGCX;VAMP8;VAMP5;RNF181;USP39;TMEM150A;ST3GAL5;PTCD3;IMMT;MRPL35	Keratinocyte;Keratinocyte;Keratinocyte;Keratinocyte;Keratinocyte;Keratinocyte;Keratinocyte;Keratinocyte;Keratinocyte;Keratinocyte;Keratinocyte;Keratinocyte;Keratinocyte
chr2	86163531	86163731	Enhancer	RETSAT;CAPG;MAT2A;GGCX;VAMP8;VAMP5;RNF181;USP39;TMEM150A;ST3GAL5	Keratinocyte;Keratinocyte;Keratinocyte;Keratinocyte;Keratinocyte;Keratinocyte;Keratinocyte;Keratinocyte;Keratinocyte;Keratinocyte
chr2	86183800	86184000	Enhancer	CAPG;GGCX;VAMP8;VAMP5;RNF181;USP39;TMEM150A;ST3GAL5	Keratinocyte;Keratinocyte;Keratinocyte;Keratinocyte;Keratinocyte;Keratinocyte;Keratinocyte;Keratinocyte
chr2	86739688	86739888	Enhancer	IMMT;KDM3A;AC015971.2;RNF103;RNF103;RMND5A;CHMP3;AC111200.10;RGPD1	Keratinocyte;Keratinocyte;Keratinocyte;Keratinocyte;Keratinocyte;Keratinocyte;Keratinocyte;Keratinocyte;Keratinocyte
chr2	95940605	95940805	Enhancer	PROM2;KCNIP3	Keratinocyte;Keratinocyte
chr2	97435733	97435933	Enhancer	LMAN2L;CNNM4;CNNM3;ANKRD23;ANKRD39;SEMA4C;FAHD2B	Keratinocyte;Keratinocyte;Keratinocyte;Keratinocyte;Keratinocyte;Keratinocyte;Keratinocyte
chr2	97437518	97437718	Enhancer	LMAN2L;CNNM4;CNNM3;ANKRD23;ANKRD39;SEMA4C;FAHD2B;ANKRD36	Keratinocyte;Keratinocyte;Keratinocyte;Keratinocyte;Keratinocyte;Keratinocyte;Keratinocyte;Keratinocyte
chr2	97547961	97548161	Enhancer	LMAN2L;CNNM4;ANKRD23;ANKRD39;SEMA4C	Keratinocyte;Keratinocyte;Keratinocyte;Keratinocyte;Keratinocyte
chr2	97594015	97594215	Enhancer	LMAN2L;CNNM4	Keratinocyte;Keratinocyte
chr2	98583304	98583504	Enhancer	COX5B;ACTR1B;ZAP70;HMGN1P36;TMEM131;ATP5BP1	Keratinocyte;Keratinocyte;Keratinocyte;Keratinocyte;Keratinocyte;Keratinocyte
chr2	98744050	98744250	Enhancer	COX5B;HMGN1P36;ATP5BP1	Keratinocyte;Keratinocyte;Keratinocyte
chr2	98795935	98796135	Enhancer	COX5B;HMGN1P36;ATP5BP1	Keratinocyte;Keratinocyte;Keratinocyte
chr2	100091372	100091572	Enhancer	MRPL30;LYG1;EIF5B;TXNDC9;REV1	Keratinocyte;Keratinocyte;Keratinocyte;Keratinocyte;Keratinocyte
chr2	101348130	101348330	Enhancer	RPL31;C2orf29	Keratinocyte;Keratinocyte
chr2	101437772	101437972	Enhancer	AC068538.2;PDCL3;NPAS2;AC092168.2;AC016738.4;C2orf29;TBC1D8	Keratinocyte;Keratinocyte;Keratinocyte;Keratinocyte;Keratinocyte;Keratinocyte;Keratinocyte
chr2	101663533	101663733	Enhancer	NPAS2;AC016738.3;RPL31;AC016738.4;C2orf29;TBC1D8;RNF149;CREG2;MAP4K4	Keratinocyte;Keratinocyte;Keratinocyte;Keratinocyte;Keratinocyte;Keratinocyte;Keratinocyte;Keratinocyte;Keratinocyte
chr2	101726380	101726580	Enhancer	AC016738.3;RPL31;AC016738.4;C2orf29;TBC1D8;RNF149;CREG2;AC092570.4;MAP4K4	Keratinocyte;Keratinocyte;Keratinocyte;Keratinocyte;Keratinocyte;Keratinocyte;Keratinocyte;Keratinocyte;Keratinocyte
chr2	101766486	101766686	Enhancer	AC068538.2;NPAS2;AC092168.2;AC016738.3;RPL31;AC016738.4;C2orf29;TBC1D8;RNF149;CREG2;MAP4K4	Keratinocyte;Keratinocyte;Keratinocyte;Keratinocyte;Keratinocyte;Keratinocyte;Keratinocyte;Keratinocyte;Keratinocyte;Keratinocyte;Keratinocyte
chr2	101801718	101801918	Enhancer	NPAS2;AC092168.2;AC016738.3;RPL31;AC016738.4;C2orf29;TBC1D8;RNF149;CREG2;MAP4K4	Keratinocyte;Keratinocyte;Keratinocyte;Keratinocyte;Keratinocyte;Keratinocyte;Keratinocyte;Keratinocyte;Keratinocyte;Keratinocyte
chr2	101947320	101947520	Enhancer	AC016738.3;RPL31;AC016738.4;C2orf29;TBC1D8;RNF149;CREG2;MAP4K4;IL1R2	Keratinocyte;Keratinocyte;Keratinocyte;Keratinocyte;Keratinocyte;Keratinocyte;Keratinocyte;Keratinocyte;Keratinocyte
chr2	102418946	102419146	Enhancer	C2orf29;AC092570.4;MAP4K4;AC005035.1;IL1R2;IL1R1;IL1RL2	Keratinocyte;Keratinocyte;Keratinocyte;Keratinocyte;Keratinocyte;Keratinocyte;Keratinocyte
chr2	102435049	102435249	Enhancer	C2orf29;TBC1D8;CREG2;AC092570.4;MAP4K4;AC005035.1;IL1R2;IL1R1	Keratinocyte;Keratinocyte;Keratinocyte;Keratinocyte;Keratinocyte;Keratinocyte;Keratinocyte;Keratinocyte
chr2	102771936	102772136	Enhancer	MAP4K4;AC005035.1;IL1R2;IL1R1;IL1RL2;IL18R1	Keratinocyte;Keratinocyte;Keratinocyte;Keratinocyte;Keratinocyte;Keratinocyte
chr2	102772523	102772723	Enhancer	MAP4K4;AC005035.1;IL1R2;IL1R1;IL1RL2;IL18R1	Keratinocyte;Keratinocyte;Keratinocyte;Keratinocyte;Keratinocyte;Keratinocyte
chr2	102976168	102976368	Enhancer	IL1R2	Keratinocyte
chr2	103352196	103352396	Enhancer	MFSD9;TMEM182	Keratinocyte;Keratinocyte
chr2	103352242	103352442	Enhancer	MFSD9;TMEM182	Keratinocyte;Keratinocyte
chr2	106013456	106013656	Enhancer	AC108058.1;AC012360.6;FHL2;AC104655.2;AC012360.4;TGFBRAP1;C2orf49	HUVEC,Keratinocyte;HUVEC,Keratinocyte;HUVEC,Keratinocyte;Keratinocyte;Keratinocyte;Keratinocyte;Keratinocyte
chr2	106013785	106013985	Enhancer	AC108058.1;AC012360.6;FHL2;AC104655.2;AC012360.4;TGFBRAP1;C2orf49	HUVEC,Keratinocyte;HUVEC,Keratinocyte;HUVEC,Keratinocyte;Keratinocyte;Keratinocyte;Keratinocyte;Keratinocyte
chr2	106013917	106014117	Enhancer	AC108058.1;AC012360.6;FHL2;AC104655.2;AC012360.4;TGFBRAP1;C2orf49	HUVEC,Keratinocyte;HUVEC,Keratinocyte;HUVEC,Keratinocyte;Keratinocyte;Keratinocyte;Keratinocyte;Keratinocyte
chr2	106020929	106021129	Enhancer	AC104655.2;AC012360.4;TGFBRAP1;C2orf49;AC108058.1;AC012360.6;FHL2;NCK2	Keratinocyte;Keratinocyte;Keratinocyte;Keratinocyte;Keratinocyte;Keratinocyte;Keratinocyte;Keratinocyte
chr2	106022936	106023136	Enhancer	AC104655.2;AC012360.4;TGFBRAP1;C2orf49;AC108058.1;AC012360.6;FHL2;NCK2	Keratinocyte;Keratinocyte;Keratinocyte;Keratinocyte;Keratinocyte;Keratinocyte;Keratinocyte;Keratinocyte
chr2	106430783	106430983	Enhancer	FHL2;NCK2;AC009505.2;UXS1	Keratinocyte;Keratinocyte;Keratinocyte;Keratinocyte
chr2	106741524	106741724	Enhancer	NCK2;UXS1	Keratinocyte;Keratinocyte
chr2	109550007	109550207	Enhancer	LIMS1;AC010095.7;RANBP2;AC073415.2;SNRPGP9	Keratinocyte;Keratinocyte;Keratinocyte;Keratinocyte;Keratinocyte
chr2	110024318	110024518	Enhancer	SEPT10;SOWAHC	Keratinocyte;Keratinocyte
chr2	110083812	110084012	Enhancer	AC109815.2;RPL22P11	Keratinocyte;Keratinocyte
chr2	110084478	110084678	Enhancer	AC109815.2;RPL22P11	Keratinocyte;Keratinocyte
chr2	110432828	110433028	Enhancer	AC011753.7;AC109815.2;RPL22P11;AC013268.5;AC013268.2;AC013268.3	Keratinocyte;Keratinocyte;Keratinocyte;Keratinocyte;Keratinocyte;Keratinocyte
chr2	110433576	110433776	Enhancer	AC011753.7;AC109815.2;RPL22P11;AC013268.5;AC013268.2;AC013268.3	Keratinocyte;Keratinocyte;Keratinocyte;Keratinocyte;Keratinocyte;Keratinocyte
chr2	112222066	112222266	Enhancer	AC068491.3;AC017002.1;AC017002.2;AC068491.1;ANAPC1;AC104651.1;AC104651.2;TMEM87B	Keratinocyte;Keratinocyte;Keratinocyte;Keratinocyte;Keratinocyte;Keratinocyte;Keratinocyte;Keratinocyte
chr2	112398270	112398470	Enhancer	AC068491.3;AC017002.1;AC017002.2;ANAPC1;AC104651.1;AC104651.2;TMEM87B	Keratinocyte;Keratinocyte;Keratinocyte;Keratinocyte;Keratinocyte;Keratinocyte;Keratinocyte
chr2	112704477	112704677	Enhancer	AC068491.3;AC068491.1;AC104651.2;TMEM87B	Keratinocyte;Keratinocyte;Keratinocyte;Keratinocyte
chr2	113563084	113563284	Enhancer	TTL;POLR1B;AC079922.2;AC079922.3;SLC20A1;NT5DC4;CKAP2L;IL1A;IL1B;AC079753.4;AC079753.5;IL36G;HMGN2P23;AC016724.6;IL36RN;IL1RN;PSD4;AC016683.5;AC016683.6;RP11	Keratinocyte;Keratinocyte;Keratinocyte;Keratinocyte;Keratinocyte;Keratinocyte;Keratinocyte;Keratinocyte;Keratinocyte;Keratinocyte;Keratinocyte;Keratinocyte;Keratinocyte;Keratinocyte;Keratinocyte;Keratinocyte;Keratinocyte;Keratinocyte;Keratinocyte;Keratinocyte
chr2	113563145	113563345	Enhancer	TTL;POLR1B;AC079922.2;AC079922.3;SLC20A1;NT5DC4;CKAP2L;IL1A;IL1B;AC079753.4;AC079753.5;IL36G;HMGN2P23;AC016724.6;IL36RN;IL1RN;PSD4;AC016683.5;AC016683.6;RP11	Keratinocyte;Keratinocyte;Keratinocyte;Keratinocyte;Keratinocyte;Keratinocyte;Keratinocyte;Keratinocyte;Keratinocyte;Keratinocyte;Keratinocyte;Keratinocyte;Keratinocyte;Keratinocyte;Keratinocyte;Keratinocyte;Keratinocyte;Keratinocyte;Keratinocyte;Keratinocyte
chr2	113571886	113572086	Enhancer	TTL;POLR1B;CHCHD5;AC012442.5;AC079922.2;AC079922.3;SLC20A1;NT5DC4;CKAP2L;IL1A;IL1B;AC079753.4;AC079753.5;IL36G;HMGN2P23;AC016724.6;IL1RN;PSD4;AC016683.5;AC016683.6;RP11	Keratinocyte;Keratinocyte;Keratinocyte;Keratinocyte;Keratinocyte;Keratinocyte;Keratinocyte;Keratinocyte;Keratinocyte;Keratinocyte;Keratinocyte;Keratinocyte;Keratinocyte;Keratinocyte;Keratinocyte;Keratinocyte;Keratinocyte;Keratinocyte;Keratinocyte;Keratinocyte;Keratinocyte
chr2	113591934	113592134	Enhancer	TTL;POLR1B;CHCHD5;AC012442.5;AC012442.6;AC079922.2;AC079922.3;SLC20A1;NT5DC4;CKAP2L;IL1A;IL1B;AC079753.4;IL37;AC079753.5;IL36G;HMGN2P23;IL1RN;PSD4;AC016683.5;AC016683.6;RP11	Keratinocyte;Keratinocyte;Keratinocyte;Keratinocyte;Keratinocyte;Keratinocyte;Keratinocyte;Keratinocyte;Keratinocyte;Keratinocyte;Keratinocyte;Keratinocyte;Keratinocyte;Keratinocyte;Keratinocyte;Keratinocyte;Keratinocyte;Keratinocyte;Keratinocyte;Keratinocyte;Keratinocyte;Keratinocyte
chr2	113649194	113649394	Enhancer	TTL;POLR1B;CHCHD5;AC079922.2;AC079922.3;SLC20A1;CKAP2L;IL1A;IL1B;AC079753.4;HMGN2P23;PSD4;AC016683.6;RP11;PAX8	Keratinocyte;Keratinocyte;Keratinocyte;Keratinocyte;Keratinocyte;Keratinocyte;Keratinocyte;Keratinocyte;Keratinocyte;Keratinocyte;Keratinocyte;Keratinocyte;Keratinocyte;Keratinocyte;Keratinocyte
chr2	113831103	113831303	Enhancer	AC079922.2;SLC20A1;IL1A;IL36B;IL36RN;AC016724.8;IL1F10;IL1RN;PSD4;AC016683.5;AC016683.6;RP11;PAX8;AC016745.2;CBWD2;RP11	Keratinocyte;Keratinocyte;Keratinocyte;Keratinocyte;Keratinocyte;Keratinocyte;Keratinocyte;Keratinocyte;Keratinocyte;Keratinocyte;Keratinocyte;Keratinocyte;Keratinocyte;Keratinocyte;Keratinocyte;Keratinocyte
chr2	113876704	113876904	Enhancer	AC079922.2;SLC20A1;CKAP2L;IL1A;IL1B;AC079753.4;IL36G;HMGN2P23;AC016724.6;IL36B;IL36RN;AC016724.8;IL1F10;IL1RN;PSD4;AC016683.5;AC016683.6;RP11;PAX8;AC016745.2;AC016745.3;CBWD2;RABL2A;RP11	Keratinocyte;Keratinocyte;Keratinocyte;Keratinocyte;Keratinocyte;Keratinocyte;Keratinocyte;Keratinocyte;Keratinocyte;Keratinocyte;Keratinocyte;Keratinocyte;Keratinocyte;Keratinocyte;Keratinocyte;Keratinocyte;Keratinocyte;Keratinocyte;Keratinocyte;Keratinocyte;Keratinocyte;Keratinocyte;Keratinocyte;Keratinocyte
chr2	113967379	113967579	Enhancer	AC079922.2;SLC20A1;CKAP2L;IL1A;IL1B;AC079753.4;AC079753.5;IL36G;HMGN2P23;AC016724.6;IL36RN;AC016724.8;IL1F10;IL1RN;PSD4;AC016683.6;RP11;PAX8;AC016745.2;AC016745.3;CBWD2;RABL2A;RP11	Keratinocyte;Keratinocyte;Keratinocyte;Keratinocyte;Keratinocyte;Keratinocyte;Keratinocyte;Keratinocyte;Keratinocyte;Keratinocyte;Keratinocyte;Keratinocyte;Keratinocyte;Keratinocyte;Keratinocyte;Keratinocyte;Keratinocyte;Keratinocyte;Keratinocyte;Keratinocyte;Keratinocyte;Keratinocyte;Keratinocyte
chr2	113967544	113967744	Enhancer	AC079922.2;SLC20A1;CKAP2L;IL1A;IL1B;AC079753.4;AC079753.5;IL36G;HMGN2P23;AC016724.6;IL36RN;AC016724.8;IL1F10;IL1RN;PSD4;AC016683.6;RP11;PAX8;AC016745.2;AC016745.3;CBWD2;RABL2A;RP11	Keratinocyte;Keratinocyte;Keratinocyte;Keratinocyte;Keratinocyte;Keratinocyte;Keratinocyte;Keratinocyte;Keratinocyte;Keratinocyte;Keratinocyte;Keratinocyte;Keratinocyte;Keratinocyte;Keratinocyte;Keratinocyte;Keratinocyte;Keratinocyte;Keratinocyte;Keratinocyte;Keratinocyte;Keratinocyte;Keratinocyte
chr2	114086583	114086783	Enhancer	CKAP2L;IL1A;IL1B;IL37;AC079753.5;IL36G;HMGN2P23;AC016724.6;IL36B;IL36RN;AC016724.8;IL1F10;IL1RN;PSD4;AC016683.6;RP11;RPL23AP7;RABL2A;RP11	Keratinocyte;Keratinocyte;Keratinocyte;Keratinocyte;Keratinocyte;Keratinocyte;Keratinocyte;Keratinocyte;Keratinocyte;Keratinocyte;Keratinocyte;Keratinocyte;Keratinocyte;Keratinocyte;Keratinocyte;Keratinocyte;Keratinocyte;Keratinocyte;Keratinocyte
chr2	114588742	114588942	Enhancer	AC010982.1;AC110769.3	Keratinocyte;Keratinocyte
chr2	114588948	114589148	Enhancer	AC110769.3	Keratinocyte
chr2	114600932	114601132	Enhancer	CBWD2;WASH2P;AC010982.1;AC110769.3	Keratinocyte;Keratinocyte;Keratinocyte;Keratinocyte
chr2	114600938	114601138	Enhancer	CBWD2;WASH2P;AC010982.1;AC110769.3	Keratinocyte;Keratinocyte;Keratinocyte;Keratinocyte
chr2	119997972	119998172	Enhancer	STEAP3;STEAP3;C2orf76;DBI;TMEM37	Keratinocyte;Keratinocyte;Keratinocyte;Keratinocyte;Keratinocyte
chr2	120107806	120108006	Enhancer	STEAP3;STEAP3;C2orf76;DBI;TMEM37	Keratinocyte;Keratinocyte;Keratinocyte;Keratinocyte;Keratinocyte
chr2	120249800	120250000	Enhancer	STEAP3	Keratinocyte
chr2	121913551	121913751	Enhancer	AC018737.6;MKI67IP;TSN	Keratinocyte;Keratinocyte;Keratinocyte
chr2	122118677	122118877	Enhancer	AC079988.3;AC018737.6;AC018737.4;MKI67IP;TSN	Keratinocyte;Keratinocyte;Keratinocyte;Keratinocyte;Keratinocyte
chr2	122121318	122121518	Enhancer	AC018737.6;AC018737.4;MKI67IP;TSN	Keratinocyte;Keratinocyte;Keratinocyte;Keratinocyte
chr2	122121665	122121865	Enhancer	AC018737.6;AC018737.4;MKI67IP;TSN	Keratinocyte;Keratinocyte;Keratinocyte;Keratinocyte
chr2	122262744	122262944	Enhancer	AC018737.4;MKI67IP;TSN	Keratinocyte;Keratinocyte;Keratinocyte
chr2	122262887	122263087	Enhancer	AC018737.4;MKI67IP;TSN	Keratinocyte;Keratinocyte;Keratinocyte
chr2	128158338	128158538	Enhancer	AC068282.3;IWS1;SFT2D3;WDR33;AC006011.4	Keratinocyte;Keratinocyte;Keratinocyte;Keratinocyte;Keratinocyte
chr2	128158501	128158701	Enhancer	AC068282.3;IWS1;SFT2D3;WDR33;AC006011.4	Keratinocyte;Keratinocyte;Keratinocyte;Keratinocyte;Keratinocyte
chr2	128158958	128159158	Enhancer	AC068282.3;IWS1;SFT2D3;WDR33;AC006011.4	Keratinocyte;Keratinocyte;Keratinocyte;Keratinocyte;Keratinocyte
chr2	129018382	129018582	Enhancer	DYNLT3P2;AC017079.4;HS6ST1;ISCA1P6	Keratinocyte;Keratinocyte;Keratinocyte;Keratinocyte
chr2	129049950	129050150	Enhancer	AC006011.4;UGGT1;DYNLT3P2;AC017079.4;HS6ST1	Keratinocyte;Keratinocyte;Keratinocyte;Keratinocyte;Keratinocyte
chr2	129320887	129321087	Enhancer	DYNLT3P2	Keratinocyte
chr2	131566522	131566722	Enhancer	ARHGEF4;AC133785.1;FAM168B;PLEKHB2;NEK2P4;NF1P8;AC131180.2;AC131180.1;POTEE;AC073869.1;GNAQP1;AC073869.20;RHOQP2	Keratinocyte;Keratinocyte;Keratinocyte;Keratinocyte;Keratinocyte;Keratinocyte;Keratinocyte;Keratinocyte;Keratinocyte;Keratinocyte;Keratinocyte;Keratinocyte;Keratinocyte
chr2	131577788	131577988	Enhancer	POTEJ;AC140481.3;ARHGEF4;AC133785.1;FAM168B;PLEKHB2;NEK2P4;NF1P8;AC131180.2;AC131180.1;POTEE;AC073869.1;GNAQP1;AC073869.20;RHOQP2	Keratinocyte;Keratinocyte;Keratinocyte;Keratinocyte;Keratinocyte;Keratinocyte;Keratinocyte;Keratinocyte;Keratinocyte;Keratinocyte;Keratinocyte;Keratinocyte;Keratinocyte;Keratinocyte;Keratinocyte
chr2	134889377	134889577	Enhancer	MGAT5	Keratinocyte
chr2	134907693	134907893	Enhancer	MGAT5;AC016906.1	Keratinocyte;Keratinocyte
chr2	135059216	135059416	Enhancer	MGAT5;AC016906.1	Keratinocyte;Keratinocyte
chr2	135831770	135831970	Enhancer	CCNT2;YSK4;RAB3GAP1	Keratinocyte;Keratinocyte;Keratinocyte
chr2	135922244	135922444	Enhancer	CCNT2;YSK4;RAB3GAP1	Keratinocyte;Keratinocyte;Keratinocyte
chr2	138829873	138830073	Enhancer	HNMT	Keratinocyte
chr2	139193281	139193481	Enhancer	AC097523.1;AC097721.1;AC092620.2;AC092620.3	Keratinocyte;Keratinocyte;Keratinocyte;Keratinocyte
chr2	143661443	143661643	Enhancer	KYNU	Keratinocyte
chr2	148603759	148603959	Enhancer	ACVR2A;AC009480.3	Keratinocyte;Keratinocyte
chr2	149863769	149863969	Enhancer	LYPD6B;AC073271.1;FAM8A3P	Keratinocyte;Keratinocyte;Keratinocyte
chr2	149884220	149884420	Enhancer	LYPD6B;AC073271.1;LYPD6	Keratinocyte;Keratinocyte;Keratinocyte
chr2	149939467	149939667	Enhancer	AC105402.3;LYPD6B;AC073271.1	Keratinocyte;Keratinocyte;Keratinocyte
chr2	150467884	150468084	Enhancer	LYPD6;AC144449.1;MMADHC	Keratinocyte;Keratinocyte;Keratinocyte
chr2	150468174	150468374	Enhancer	LYPD6;AC144449.1;MMADHC	Keratinocyte;Keratinocyte;Keratinocyte
chr2	150850719	150850919	Enhancer	MMADHC;RND3	Keratinocyte;Keratinocyte
chr2	150991216	150991416	Enhancer	RND3	Keratinocyte
chr2	153028140	153028340	Enhancer	STAM2;AC012066.1	Keratinocyte;Keratinocyte
chr2	153056647	153056847	Enhancer	AC012066.1	Keratinocyte
chr2	153098581	153098781	Enhancer	ARL5A	Keratinocyte
chr2	153323798	153323998	Enhancer	STAM2;FMNL2;AC012066.1;ARL6IP6;PRPF40A	Keratinocyte;Keratinocyte;Keratinocyte;Keratinocyte;Keratinocyte
chr2	158103235	158103435	Enhancer	AC016732.2;GALNT5	Keratinocyte;Keratinocyte
chr2	158117999	158118199	Enhancer	AC016732.2;GALNT5	Keratinocyte;Keratinocyte
chr2	158682661	158682861	Enhancer	ACVR1	Keratinocyte
chr2	159638611	159638811	Enhancer	PKP4;BTF3L4P2	Keratinocyte;Keratinocyte
chr2	159846627	159846827	Enhancer	AC005042.3;AC005042.4;DAPL1;AC064843.1;AC064843.2;AC064843.3;TANC1;BTF3L4P2;GSTM3P2;WDSUB1;AC009506.2;BAZ2B	Keratinocyte;Keratinocyte;Keratinocyte;Keratinocyte;Keratinocyte;Keratinocyte;Keratinocyte;Keratinocyte;Keratinocyte;Keratinocyte;Keratinocyte;Keratinocyte
chr2	159901917	159902117	Enhancer	AC005042.3;AC005042.4;DAPL1;AC064843.2;TANC1;BTF3L4P2;GSTM3P2;WDSUB1;AC009506.2;BAZ2B	Keratinocyte;Keratinocyte;Keratinocyte;Keratinocyte;Keratinocyte;Keratinocyte;Keratinocyte;Keratinocyte;Keratinocyte;Keratinocyte
chr2	159923317	159923517	Enhancer	AC005042.3;AC005042.4;DAPL1;TANC1;BTF3L4P2;GSTM3P2;WDSUB1;AC009506.2;BAZ2B	Keratinocyte;Keratinocyte;Keratinocyte;Keratinocyte;Keratinocyte;Keratinocyte;Keratinocyte;Keratinocyte;Keratinocyte
chr2	159967916	159968116	Enhancer	AC005042.3;AC005042.4;DAPL1;TANC1;BTF3L4P2;GSTM3P2;WDSUB1;AC009506.2	Keratinocyte;Keratinocyte;Keratinocyte;Keratinocyte;Keratinocyte;Keratinocyte;Keratinocyte;Keratinocyte
chr2	159967955	159968155	Enhancer	AC005042.3;AC005042.4;DAPL1;TANC1;BTF3L4P2;GSTM3P2;WDSUB1;AC009506.2	Keratinocyte;Keratinocyte;Keratinocyte;Keratinocyte;Keratinocyte;Keratinocyte;Keratinocyte;Keratinocyte
chr2	160012556	160012756	Enhancer	AC005042.3;AC005042.4;DAPL1;AC064843.3;TANC1;BTF3L4P2;GSTM3P2;WDSUB1;AC009506.2	Keratinocyte;Keratinocyte;Keratinocyte;Keratinocyte;Keratinocyte;Keratinocyte;Keratinocyte;Keratinocyte;Keratinocyte
chr2	160013412	160013612	Enhancer	AC005042.3;AC005042.4;DAPL1;AC064843.3;TANC1;BTF3L4P2;GSTM3P2;WDSUB1;AC009506.2	Keratinocyte;Keratinocyte;Keratinocyte;Keratinocyte;Keratinocyte;Keratinocyte;Keratinocyte;Keratinocyte;Keratinocyte
chr2	160013689	160013889	Enhancer	AC005042.3;AC005042.4;DAPL1;AC064843.3;TANC1;BTF3L4P2;GSTM3P2;WDSUB1;AC009506.2	Keratinocyte;Keratinocyte;Keratinocyte;Keratinocyte;Keratinocyte;Keratinocyte;Keratinocyte;Keratinocyte;Keratinocyte
chr2	160013915	160014115	Enhancer	AC005042.3;AC005042.4;DAPL1;AC064843.3;TANC1;BTF3L4P2;GSTM3P2;WDSUB1;AC009506.2	Keratinocyte;Keratinocyte;Keratinocyte;Keratinocyte;Keratinocyte;Keratinocyte;Keratinocyte;Keratinocyte;Keratinocyte
chr2	160025701	160025901	Enhancer	TANC1;BTF3L4P2;WDSUB1;AC009506.2;Y;BAZ2B;MARCH7;CD302	HUVEC;HUVEC;HUVEC;HUVEC;HUVEC;HUVEC;HUVEC;HUVEC
chr2	160142203	160142403	Enhancer	AC005042.3;AC064843.1;AC064843.3;TANC1;BTF3L4P2;WDSUB1	Keratinocyte;Keratinocyte;Keratinocyte;Keratinocyte;Keratinocyte;Keratinocyte
chr2	161082296	161082496	Enhancer	PLA2R1;ITGB6;RBMS1	Keratinocyte;Keratinocyte;Keratinocyte
chr2	161082474	161082674	Enhancer	PLA2R1;ITGB6;RBMS1	Keratinocyte;Keratinocyte;Keratinocyte
chr2	161113756	161113956	Enhancer	MARCH7;PLA2R1;ITGB6;RBMS1	Keratinocyte;Keratinocyte;Keratinocyte;Keratinocyte
chr2	161348681	161348881	Enhancer	PLA2R1;ITGB6;RBMS1	Keratinocyte;Keratinocyte;Keratinocyte
chr2	161812774	161812974	Enhancer	AC009299.3;PSMD14;AC009299.5	Keratinocyte;Keratinocyte;Keratinocyte
chr2	161887054	161887254	Enhancer	AC009299.3;AC009299.2;PSMD14;AC009299.5	Keratinocyte;Keratinocyte;Keratinocyte;Keratinocyte
chr2	162223300	162223500	Enhancer	TANK;AC009299.3;PSMD14;AC009299.5	Keratinocyte;Keratinocyte;Keratinocyte;Keratinocyte
chr2	165577136	165577336	Enhancer	AC019181.3;COBLL1	Keratinocyte;Keratinocyte
chr2	165704509	165704709	Enhancer	AC019181.3;AC019181.2	Keratinocyte;Keratinocyte
chr2	165824180	165824380	Enhancer	AC019181.3;AC019181.2;COBLL1	Keratinocyte;Keratinocyte;Keratinocyte
chr2	169378176	169378376	Enhancer	STK39;CERS6;AC009475.2	Keratinocyte;Keratinocyte;Keratinocyte
chr2	169421871	169422071	Enhancer	STK39;CERS6;AC009475.2;NOSTRIN	Keratinocyte;Keratinocyte;Keratinocyte;Keratinocyte
chr2	169745861	169746061	Enhancer	CERS6;SPC25	Keratinocyte;Keratinocyte
chr2	169903311	169903511	Enhancer	AC009475.2	Keratinocyte
chr2	169948377	169948577	Enhancer	AC009475.2;DHRS9	Keratinocyte;Keratinocyte
chr2	170930048	170930248	Enhancer	KLHL23;SSB;METTL5;UBR3;AC092641.2	HUVEC;HUVEC;HUVEC;HUVEC;HUVEC
chr2	171036526	171036726	Enhancer	AC092641.2;MYO3B	Keratinocyte;Keratinocyte
chr2	172030622	172030822	Enhancer	AC007405.6;GORASP2;TLK1;AC008065.1;MRPS29P2;AC007969.4;AC007969.5;CYBRD1;DYNC1I2	Keratinocyte;Keratinocyte;Keratinocyte;Keratinocyte;Keratinocyte;Keratinocyte;Keratinocyte;Keratinocyte;Keratinocyte
chr2	172073426	172073626	Enhancer	GORASP2;TLK1;AC008065.1;DCAF17;METTL8;MRPS29P2;AC007969.4;AC007969.5;CYBRD1;DYNC1I2	Keratinocyte;Keratinocyte;Keratinocyte;Keratinocyte;Keratinocyte;Keratinocyte;Keratinocyte;Keratinocyte;Keratinocyte;Keratinocyte
chr2	172266578	172266778	Enhancer	AC008065.1;DCAF17;METTL8;MRPS29P2;AC007969.4;AC007969.5;CYBRD1;DYNC1I2	Keratinocyte;Keratinocyte;Keratinocyte;Keratinocyte;Keratinocyte;Keratinocyte;Keratinocyte;Keratinocyte
chr2	172409796	172409996	Enhancer	TLK1;AC008065.1;DCAF17;METTL8;MRPS29P2;AC007969.4;AC007969.5;CYBRD1;AC064826.2;DYNC1I2;AC068039.4;HAT1	HUVEC,Keratinocyte;HUVEC,Keratinocyte;HUVEC,Keratinocyte;HUVEC,Keratinocyte;HUVEC,Keratinocyte;HUVEC,Keratinocyte;HUVEC,Keratinocyte;HUVEC,Keratinocyte;HUVEC;HUVEC,Keratinocyte;HUVEC,Keratinocyte;HUVEC,Keratinocyte
chr2	172865489	172865689	Enhancer	DYNC1I2;AC068039.4;HAT1;METAP1D;SLC25A12;ITGA6;AC078883.4;AC078883.3	Keratinocyte;Keratinocyte;Keratinocyte;Keratinocyte;Keratinocyte;Keratinocyte;Keratinocyte;Keratinocyte
chr2	172873800	172874000	Enhancer	MRPS29P2;AC007969.4;AC007969.5;CYBRD1;DYNC1I2;HAT1;METAP1D;SLC25A12;ITGA6;AC078883.4;AC078883.3	Keratinocyte;Keratinocyte;Keratinocyte;Keratinocyte;Keratinocyte;Keratinocyte;Keratinocyte;Keratinocyte;Keratinocyte;Keratinocyte;Keratinocyte
chr2	173061901	173062101	Enhancer	HAT1;METAP1D;AC078883.4;AC078883.3;PDK1;AC093818.1	Keratinocyte;Keratinocyte;Keratinocyte;Keratinocyte;Keratinocyte;Keratinocyte
chr2	173080053	173080253	Enhancer	DYNC1I2;HAT1;METAP1D;AC078883.4;AC078883.3;PDK1;AC093818.1	Keratinocyte;Keratinocyte;Keratinocyte;Keratinocyte;Keratinocyte;Keratinocyte;Keratinocyte
chr2	173093231	173093431	Enhancer	DYNC1I2;HAT1;METAP1D;SLC25A12;AC078883.4;AC078883.3;PDK1;AC093818.1	Keratinocyte;Keratinocyte;Keratinocyte;Keratinocyte;Keratinocyte;Keratinocyte;Keratinocyte;Keratinocyte
chr2	173096228	173096428	Enhancer	DYNC1I2;HAT1;METAP1D;SLC25A12;DLX1;AC078883.4;AC078883.3;PDK1;AC093818.1	Keratinocyte;Keratinocyte;Keratinocyte;Keratinocyte;Keratinocyte;Keratinocyte;Keratinocyte;Keratinocyte;Keratinocyte
chr2	173313354	173313554	Enhancer	METAP1D;SLC25A12;DLX1;DLX2;AC104801.1;ITGA6;AC078883.4;AC078883.3;AC093818.1	Keratinocyte;Keratinocyte;Keratinocyte;Keratinocyte;Keratinocyte;Keratinocyte;Keratinocyte;Keratinocyte;Keratinocyte
chr2	173421744	173421944	Enhancer	HAT1;ITGA6;AC078883.4;PDK1	Keratinocyte;Keratinocyte;Keratinocyte;Keratinocyte
chr2	173423377	173423577	Enhancer	HAT1;ITGA6;AC078883.4;PDK1	Keratinocyte;Keratinocyte;Keratinocyte;Keratinocyte
chr2	173850150	173850350	Enhancer	MLK7;RP11;CDCA7;AC073465.3;AC013461.1	Keratinocyte;Keratinocyte;Keratinocyte;Keratinocyte;Keratinocyte
chr2	173995695	173995895	Enhancer	AC013461.1;MLK7;RP11;CDCA7;AC073465.3	Keratinocyte;Keratinocyte;Keratinocyte;Keratinocyte;Keratinocyte
chr2	174056370	174056570	Enhancer	AC013461.1;MLK7;RP11;AC073465.3	Keratinocyte;Keratinocyte;Keratinocyte;Keratinocyte
chr2	174079089	174079289	Enhancer	AC013461.1	Keratinocyte
chr2	174220927	174221127	Enhancer	AC013461.1;CDCA7;AC013410.2	Keratinocyte;Keratinocyte;Keratinocyte
chr2	174220949	174221149	Enhancer	AC013461.1;CDCA7;AC013410.2	Keratinocyte;Keratinocyte;Keratinocyte
chr2	174292886	174293086	Enhancer	AC013461.1;CDCA7;AC073465.1	Keratinocyte;Keratinocyte;Keratinocyte
chr2	174454117	174454317	Enhancer	CDCA7	Keratinocyte
chr2	174454220	174454420	Enhancer	CDCA7	Keratinocyte
chr2	174848144	174848344	Enhancer	OLA1;AC018470.3;SCRN3	Keratinocyte;Keratinocyte;Keratinocyte
chr2	174856649	174856849	Enhancer	SP3;OLA1;AC018470.3;SCRN3	Keratinocyte;Keratinocyte;Keratinocyte;Keratinocyte
chr2	174940723	174940923	Enhancer	SP3;OLA1	Keratinocyte;Keratinocyte
chr2	175045320	175045520	Enhancer	SP3;OLA1;AC018470.3;SP9;AC010894.4	Keratinocyte;Keratinocyte;Keratinocyte;Keratinocyte;Keratinocyte
chr2	175307565	175307765	Enhancer	OLA1;CIR1;SCRN3;GPR155;AC010894.3	Keratinocyte;Keratinocyte;Keratinocyte;Keratinocyte;Keratinocyte
chr2	175400467	175400667	Enhancer	OLA1;AC010894.4	Keratinocyte;Keratinocyte
chr2	175867317	175867517	Enhancer	CHN1;RP11;ATP5G3	Keratinocyte;Keratinocyte;Keratinocyte
chr2	177355277	177355477	Enhancer	AC016739.2	Keratinocyte
chr2	177355504	177355704	Enhancer	AC016739.2	Keratinocyte
chr2	177399821	177400021	Enhancer	AC016739.2;MTX2	Keratinocyte;Keratinocyte
chr2	178187639	178187839	Enhancer	AC079305.5;KRT8P40;HNRNPA3;AC079305.9;AC079305.10;AGPS;AC074286.1;NFE2L2;TTC30B	Keratinocyte;Keratinocyte;Keratinocyte;Keratinocyte;Keratinocyte;Keratinocyte;Keratinocyte;Keratinocyte;Keratinocyte
chr2	178187927	178188127	Enhancer	AC079305.5;KRT8P40;HNRNPA3;AC079305.9;AC079305.10;AGPS;AC074286.1;NFE2L2;TTC30B	Keratinocyte;Keratinocyte;Keratinocyte;Keratinocyte;Keratinocyte;Keratinocyte;Keratinocyte;Keratinocyte;Keratinocyte
chr2	179196467	179196667	Enhancer	AC009948.5	Keratinocyte
chr2	181385751	181385951	Enhancer	FTH1P20	Keratinocyte
chr2	182388559	182388759	Enhancer	SSFA2	Keratinocyte
chr2	182649555	182649755	Enhancer	AC013733.5;PPP1R1C;KRT18P29	Keratinocyte;Keratinocyte;Keratinocyte
chr2	183884485	183884685	Enhancer	NCKAP1;KRT8P10;DUSP19;AC064871.3;NUP35	Keratinocyte;Keratinocyte;Keratinocyte;Keratinocyte;Keratinocyte
chr2	188851174	188851374	Enhancer	AC104131.1	Keratinocyte
chr2	190043437	190043637	Enhancer	COL5A2;WDR75	Keratinocyte;Keratinocyte
chr2	190119263	190119463	Enhancer	ASNSD1	Keratinocyte
chr2	190119319	190119519	Enhancer	ASNSD1	Keratinocyte
chr2	191223651	191223851	Enhancer	AC019178.1;INPP1;HIBCH;TMEM194B;AC093388.3;NAB1;GLS;AC067945.3	Keratinocyte;Keratinocyte;Keratinocyte;Keratinocyte;Keratinocyte;Keratinocyte;Keratinocyte;Keratinocyte
chr2	191278548	191278748	Enhancer	INPP1;HIBCH;MFSD6;TMEM194B;AC093388.3;GLS;AC067945.3;STAT1	Keratinocyte;Keratinocyte;Keratinocyte;Keratinocyte;Keratinocyte;Keratinocyte;Keratinocyte;Keratinocyte
chr2	191333621	191333821	Enhancer	INPP1;HIBCH;MFSD6;TMEM194B;AC093388.3;GLS;AC005540.3;AC067945.3;STAT1	Keratinocyte;Keratinocyte;Keratinocyte;Keratinocyte;Keratinocyte;Keratinocyte;Keratinocyte;Keratinocyte;Keratinocyte
chr2	191333698	191333898	Enhancer	INPP1;HIBCH;MFSD6;TMEM194B;AC093388.3;GLS;AC005540.3;AC067945.3;STAT1	Keratinocyte;Keratinocyte;Keratinocyte;Keratinocyte;Keratinocyte;Keratinocyte;Keratinocyte;Keratinocyte;Keratinocyte
chr2	191438230	191438430	Enhancer	INPP1;HIBCH;MFSD6;TMEM194B;AC093388.3;AC006460.2;GLS;AC005540.3;AC067945.3;STAT1	Keratinocyte;Keratinocyte;Keratinocyte;Keratinocyte;Keratinocyte;Keratinocyte;Keratinocyte;Keratinocyte;Keratinocyte;Keratinocyte
chr2	191517545	191517745	Enhancer	INPP1;HIBCH;TMEM194B;AC093388.3;NAB1;AC006460.2;GLS;AC005540.3;AC067945.3;STAT1;MYO1B	Keratinocyte;Keratinocyte;Keratinocyte;Keratinocyte;Keratinocyte;Keratinocyte;Keratinocyte;Keratinocyte;Keratinocyte;Keratinocyte;Keratinocyte
chr2	191517624	191517824	Enhancer	INPP1;HIBCH;TMEM194B;AC093388.3;NAB1;AC006460.2;GLS;AC005540.3;AC067945.3;STAT1;MYO1B	Keratinocyte;Keratinocyte;Keratinocyte;Keratinocyte;Keratinocyte;Keratinocyte;Keratinocyte;Keratinocyte;Keratinocyte;Keratinocyte;Keratinocyte
chr2	192043511	192043711	Enhancer	NAB1;GLS;AC005540.3;AC067945.3;STAT1;MYO1B;AC092614.2	Keratinocyte;Keratinocyte;Keratinocyte;Keratinocyte;Keratinocyte;Keratinocyte;Keratinocyte
chr2	192458862	192459062	Enhancer	AC067945.3;STAT1;MYO1B;DNAJB1P1	Keratinocyte;Keratinocyte;Keratinocyte;Keratinocyte
chr2	192475932	192476132	Enhancer	AC067945.3;STAT1;MYO1B;DNAJB1P1	Keratinocyte;Keratinocyte;Keratinocyte;Keratinocyte
chr2	192511448	192511648	Enhancer	AC067945.3;STAT1;MYO1B;OBFC2A	Keratinocyte;Keratinocyte;Keratinocyte;Keratinocyte
chr2	192807094	192807294	Enhancer	OBFC2A;DNAJB1P1	Keratinocyte;Keratinocyte
chr2	196343157	196343357	Enhancer	AC064834.4	Keratinocyte
chr2	201217391	201217591	Enhancer	C2orf47;TYW5;SPATS2L;SGOL2;KCTD18;AOX1;BZW1;NIF3L1	Keratinocyte;Keratinocyte;Keratinocyte;Keratinocyte;Keratinocyte;Keratinocyte;Keratinocyte;Keratinocyte
chr2	202286812	202287012	Enhancer	CASP10;CASP8;ALS2CR12;STRADB;AC007256.5;TRAK2;ALS2CR11;ENO1P4;TMEM237	HUVEC;HUVEC;HUVEC;HUVEC;HUVEC;HUVEC;HUVEC;HUVEC;HUVEC
chr2	202304948	202305148	Enhancer	AC007272.2;NDUFB3;CFLAR;IMPDH1P10;AC007283.4;ALS2CR12;STRADB;AC007256.5;TRAK2	Keratinocyte;Keratinocyte;Keratinocyte;Keratinocyte;Keratinocyte;Keratinocyte;Keratinocyte;Keratinocyte;Keratinocyte
chr2	202506368	202506568	Enhancer	ALS2CR11;ENO1P4;TMEM237	Keratinocyte;Keratinocyte;Keratinocyte
chr2	204551870	204552070	Enhancer	RAPH1	Keratinocyte
chr2	205557973	205558173	Enhancer	PARD3B	HUVEC
chr2	207076301	207076501	Enhancer	AC007383.4;EEF1B2;NDUFS1;GPR1;7SK;AC007383.6	Keratinocyte;Keratinocyte;Keratinocyte;Keratinocyte;Keratinocyte;Keratinocyte
chr2	208500267	208500467	Enhancer	KLF7;AC007879.2;AC007879.7;CREB1;AC007879.5;AC079767.2;METTL21A;FZD5;AC096772.6;AC093698.1	Keratinocyte;Keratinocyte;Keratinocyte;Keratinocyte;Keratinocyte;Keratinocyte;Keratinocyte;Keratinocyte;Keratinocyte;Keratinocyte
chr2	208585698	208585898	Enhancer	KLF7;AC007879.7;CREB1;AC007879.5;AC079767.2;METTL21A;PPP1R14BP2;CCNYL1;FZD5;AC096772.6;AC093698.1;AC093698.2	Keratinocyte;Keratinocyte;Keratinocyte;Keratinocyte;Keratinocyte;Keratinocyte;Keratinocyte;Keratinocyte;Keratinocyte;Keratinocyte;Keratinocyte;Keratinocyte
chr2	208656172	208656372	Enhancer	KLF7;AC007879.7;CREB1;AC007879.5;AC079767.2;METTL21A;PPP1R14BP2;CCNYL1;AC093698.1;AC093698.2	Keratinocyte;Keratinocyte;Keratinocyte;Keratinocyte;Keratinocyte;Keratinocyte;Keratinocyte;Keratinocyte;Keratinocyte;Keratinocyte
chr2	213805107	213805307	Enhancer	SPAG16	Keratinocyte
chr2	213969240	213969440	Enhancer	SPAG16	Keratinocyte
chr2	213969271	213969471	Enhancer	SPAG16	Keratinocyte
chr2	215764654	215764854	Enhancer	AC016708.2;AC072062.1;ATIC;FN1	Keratinocyte;Keratinocyte;Keratinocyte;Keratinocyte
chr2	215936541	215936741	Enhancer	ABCA12;ATIC;FN1;AC012462.2	Keratinocyte;Keratinocyte;Keratinocyte;Keratinocyte
chr2	215970405	215970605	Enhancer	AC016708.2;ABCA12;ATIC;FN1	Keratinocyte;Keratinocyte;Keratinocyte;Keratinocyte
chr2	216831643	216831843	Enhancer	AC093382.1;MREG;PECR;XRCC5;AC012513.3;AC012513.4;RP11;MARCH4;SMARCAL1;RPL37A	Keratinocyte;Keratinocyte;Keratinocyte;Keratinocyte;Keratinocyte;Keratinocyte;Keratinocyte;Keratinocyte;Keratinocyte;Keratinocyte
chr2	216837953	216838153	Enhancer	AC122136.1;AC093382.1;MREG;PECR;XRCC5;AC012513.3;AC012513.4;RP11;MARCH4	Keratinocyte;Keratinocyte;Keratinocyte;Keratinocyte;Keratinocyte;Keratinocyte;Keratinocyte;Keratinocyte;Keratinocyte
chr2	216876869	216877069	Enhancer	AC093850.1;AC122136.1;AC093382.1;MREG;XRCC5;MARCH4;SMARCAL1	Keratinocyte;Keratinocyte;Keratinocyte;Keratinocyte;Keratinocyte;Keratinocyte;Keratinocyte
chr2	217157763	217157963	Enhancer	MARCH4;SMARCAL1;RPL37A;AC098820.3;AC073321.5;PSMB3P2;IGFBP2	Keratinocyte;Keratinocyte;Keratinocyte;Keratinocyte;Keratinocyte;Keratinocyte;Keratinocyte
chr2	217227372	217227572	Enhancer	MREG;PECR;XRCC5;AC012513.3;AC012513.4;MARCH4;SMARCAL1;PSMB3P2;IGFBP2	Keratinocyte;Keratinocyte;Keratinocyte;Keratinocyte;Keratinocyte;Keratinocyte;Keratinocyte;Keratinocyte;Keratinocyte
chr2	217578551	217578751	Enhancer	SMARCAL1;AC098820.4;RPL37A;AC098820.3;AC073321.5;PSMB3P2;IGFBP2;AC007563.5	Keratinocyte;Keratinocyte;Keratinocyte;Keratinocyte;Keratinocyte;Keratinocyte;Keratinocyte;Keratinocyte
chr2	217583041	217583241	Enhancer	XRCC5;MARCH4;SMARCAL1;AC098820.4;RPL37A;AC098820.3;AC073321.5;PSMB3P2;IGFBP2;AC007563.5	Keratinocyte;Keratinocyte;Keratinocyte;Keratinocyte;Keratinocyte;Keratinocyte;Keratinocyte;Keratinocyte;Keratinocyte;Keratinocyte
chr2	217657437	217657637	Enhancer	MARCH4;SMARCAL1;RPL37A;AC073321.5;IGFBP2	Keratinocyte;Keratinocyte;Keratinocyte;Keratinocyte;Keratinocyte
chr2	217802090	217802290	Enhancer	RPL37A;PSMB3P2;IGFBP2	Keratinocyte;Keratinocyte;Keratinocyte
chr2	218559709	218559909	Enhancer	RPL7L1P9	Keratinocyte
chr2	218762457	218762657	Enhancer	ARPC2;RP11;AAMP;PNKD;TMBIM1	Keratinocyte;Keratinocyte;Keratinocyte;Keratinocyte;Keratinocyte
chr2	219162986	219163186	Enhancer	CXCR2P1;CXCR2;CXCR1;HMGB1P9;ARPC2;RP11;GPBAR1;AAMP;PNKD;TMBIM1;AC021016.7;CTDSP1;VIL1	Keratinocyte;Keratinocyte;Keratinocyte;Keratinocyte;Keratinocyte;Keratinocyte;Keratinocyte;Keratinocyte;Keratinocyte;Keratinocyte;Keratinocyte;Keratinocyte;Keratinocyte
chr2	219249818	219250018	Enhancer	HMGB1P9;ARPC2;RP11;GPBAR1;AAMP;PNKD;TMBIM1;AC021016.7;C2orf62;CTDSP1;VIL1;RQCD1;BCS1L;ZNF142;STK36;RNF25;TTLL4;CYP27A1;AC021016.6;SLC11A1;CXCR2;CXCR1;AC021016.8	HUVEC,Keratinocyte;HUVEC,Keratinocyte;HUVEC,Keratinocyte;HUVEC,Keratinocyte;HUVEC,Keratinocyte;HUVEC,Keratinocyte;HUVEC,Keratinocyte;HUVEC,Keratinocyte;HUVEC,Keratinocyte;HUVEC,Keratinocyte;HUVEC;HUVEC;HUVEC;HUVEC;HUVEC;HUVEC;HUVEC;HUVEC;HUVEC,Keratinocyte;HUVEC,Keratinocyte;Keratinocyte;Keratinocyte;Keratinocyte
chr2	219473284	219473484	Enhancer	ARPC2;RP11;AAMP;PNKD;TMBIM1;AC021016.7;USP37;RQCD1;PLCD4;BCS1L;ZNF142;STK36;RNF25;TTLL4;KRT8P30	Keratinocyte;Keratinocyte;Keratinocyte;Keratinocyte;Keratinocyte;Keratinocyte;Keratinocyte;Keratinocyte;Keratinocyte;Keratinocyte;Keratinocyte;Keratinocyte;Keratinocyte;Keratinocyte;Keratinocyte
chr2	219746979	219747179	Enhancer	PLCD4;WNT6;WNT10A	Keratinocyte;Keratinocyte;Keratinocyte
chr2	219749105	219749305	Enhancer	PLCD4;WNT6;WNT10A	Keratinocyte;Keratinocyte;Keratinocyte
chr2	221961568	221961768	Enhancer	AC079834.1	Keratinocyte
chr2	223437082	223437282	Enhancer	SGPP2;RP11;FARSB;AC016712.2;ACSL3;ATG12P2;AC097461.4	Keratinocyte;Keratinocyte;Keratinocyte;Keratinocyte;Keratinocyte;Keratinocyte;Keratinocyte
chr2	223670381	223670581	Enhancer	FARSB;ACSL3;ATG12P2;AC097461.4	Keratinocyte;Keratinocyte;Keratinocyte;Keratinocyte
chr2	223670510	223670710	Enhancer	FARSB;ACSL3;ATG12P2;AC097461.4	Keratinocyte;Keratinocyte;Keratinocyte;Keratinocyte
chr2	223702551	223702751	Enhancer	FARSB;AC016712.2;ACSL3;ATG12P2;AC097461.4	Keratinocyte;Keratinocyte;Keratinocyte;Keratinocyte;Keratinocyte
chr2	223747253	223747453	Enhancer	SGPP2;RP11;FARSB;AC016712.1;AC016712.2;ACSL3;ATG12P2;AC097461.4	Keratinocyte;Keratinocyte;Keratinocyte;Keratinocyte;Keratinocyte;Keratinocyte;Keratinocyte;Keratinocyte
chr2	224751889	224752089	Enhancer	AC012512.1;AP1S3;WDFY1;MRPL44;AC073641.2;SERPINE2	Keratinocyte;Keratinocyte;Keratinocyte;Keratinocyte;Keratinocyte;Keratinocyte
chr2	225276860	225277060	Enhancer	MRPL44;SERPINE2;AC073052.1;CUL3	Keratinocyte;Keratinocyte;Keratinocyte;Keratinocyte
chr2	225838262	225838462	Enhancer	CUL3	Keratinocyte
chr2	227780638	227780838	Enhancer	IRS1;RP11;RHBDD1	Keratinocyte;Keratinocyte;Keratinocyte
chr2	227842792	227842992	Enhancer	IRS1;RP11;RHBDD1	Keratinocyte;Keratinocyte;Keratinocyte
chr2	228567895	228568095	Enhancer	AGFG1;SLC19A3	Keratinocyte;Keratinocyte
chr2	228624540	228624740	Enhancer	AGFG1	Keratinocyte
chr2	228653257	228653457	Enhancer	AGFG1	Keratinocyte
chr2	228711266	228711466	Enhancer	AGFG1;CCL20	Keratinocyte;Keratinocyte
chr2	228754106	228754306	Enhancer	AGFG1	Keratinocyte
chr2	230845323	230845523	Enhancer	TRIP12	HUVEC
chr2	231288754	231288954	Enhancer	AC009950.1;SP110;SP140;SP140L;SP100;CAB39;AC084031.1;ITM2C;COX20P2;PSMD1	Keratinocyte;Keratinocyte;Keratinocyte;Keratinocyte;Keratinocyte;Keratinocyte;Keratinocyte;Keratinocyte;Keratinocyte;Keratinocyte
chr2	231545706	231545906	Enhancer	SP140L;SP100;AC010149.1;HMGB1P3;AC098823.3;CAB39;AC084031.1;ITM2C;COX20P2;PSMD1;AC018738.2	Keratinocyte;Keratinocyte;Keratinocyte;Keratinocyte;Keratinocyte;Keratinocyte;Keratinocyte;Keratinocyte;Keratinocyte;Keratinocyte;Keratinocyte
chr2	231642611	231642811	Enhancer	SP140L;SP100;AC010149.1;HMGB1P3;TPM3P8;AC098823.3;CAB39;AC084031.1;ITM2C;COX20P2;ARMC9	Keratinocyte;Keratinocyte;Keratinocyte;Keratinocyte;Keratinocyte;Keratinocyte;Keratinocyte;Keratinocyte;Keratinocyte;Keratinocyte;Keratinocyte
chr2	231642906	231643106	Enhancer	SP140L;SP100;AC010149.1;HMGB1P3;TPM3P8;AC098823.3;CAB39;AC084031.1;ITM2C;COX20P2;ARMC9	Keratinocyte;Keratinocyte;Keratinocyte;Keratinocyte;Keratinocyte;Keratinocyte;Keratinocyte;Keratinocyte;Keratinocyte;Keratinocyte;Keratinocyte
chr2	232152658	232152858	Enhancer	ITM2C;COX20P2;PSMD1;ARMC9;AC018738.2;AC017104.6;PTMA	Keratinocyte;Keratinocyte;Keratinocyte;Keratinocyte;Keratinocyte;Keratinocyte;Keratinocyte
chr2	232485474	232485674	Enhancer	ARMC9;COPS7B;PDE6D;RP11;DIS3L2	Keratinocyte;Keratinocyte;Keratinocyte;Keratinocyte;Keratinocyte
chr2	232485682	232485882	Enhancer	ARMC9;COPS7B;PDE6D;RP11;DIS3L2	Keratinocyte;Keratinocyte;Keratinocyte;Keratinocyte;Keratinocyte
chr2	232545280	232545480	Enhancer	AC018738.2;ZBTB8OSP2;SNORA75;PTMA;COPS7B;PDE6D;RP11;RP11	Keratinocyte;Keratinocyte;Keratinocyte;Keratinocyte;Keratinocyte;Keratinocyte;Keratinocyte;Keratinocyte
chr2	232557465	232557665	Enhancer	ZBTB8OSP2;SNORA75;PTMA;PDE6D	Keratinocyte;Keratinocyte;Keratinocyte;Keratinocyte
chr2	232557552	232557752	Enhancer	ZBTB8OSP2;SNORA75;PTMA;PDE6D	Keratinocyte;Keratinocyte;Keratinocyte;Keratinocyte
chr2	234389040	234389240	Enhancer	USP40;UGT1A8;UGT1A10;UGT1A7;UGT1A6;AC114812.8;UGT1A4;RPL17P11;UGT1A3;DNAJB3;UGT1A2P;AC114812.10;AC114812.5;UGT1A1;HJURP;MSL3P1	Keratinocyte;Keratinocyte;Keratinocyte;Keratinocyte;Keratinocyte;Keratinocyte;Keratinocyte;Keratinocyte;Keratinocyte;Keratinocyte;Keratinocyte;Keratinocyte;Keratinocyte;Keratinocyte;Keratinocyte;Keratinocyte
chr2	234390232	234390432	Enhancer	USP40;UGT1A8;UGT1A10;UGT1A7;UGT1A6;AC114812.8;UGT1A4;RPL17P11;UGT1A3;DNAJB3;UGT1A2P;AC114812.10;AC114812.5;UGT1A1;HJURP;MSL3P1	Keratinocyte;Keratinocyte;Keratinocyte;Keratinocyte;Keratinocyte;Keratinocyte;Keratinocyte;Keratinocyte;Keratinocyte;Keratinocyte;Keratinocyte;Keratinocyte;Keratinocyte;Keratinocyte;Keratinocyte;Keratinocyte
chr2	234390445	234390645	Enhancer	USP40;UGT1A8;UGT1A10;UGT1A7;UGT1A6;AC114812.8;UGT1A4;RPL17P11;UGT1A3;DNAJB3;UGT1A2P;AC114812.10;AC114812.5;UGT1A1;HJURP;MSL3P1	Keratinocyte;Keratinocyte;Keratinocyte;Keratinocyte;Keratinocyte;Keratinocyte;Keratinocyte;Keratinocyte;Keratinocyte;Keratinocyte;Keratinocyte;Keratinocyte;Keratinocyte;Keratinocyte;Keratinocyte;Keratinocyte
chr2	234398447	234398647	Enhancer	SCARNA5;DGKD;USP40;UGT1A6;AC114812.8;UGT1A4	Keratinocyte;Keratinocyte;Keratinocyte;Keratinocyte;Keratinocyte;Keratinocyte
chr2	234399554	234399754	Enhancer	SCARNA5;DGKD;USP40;UGT1A6;AC114812.8;UGT1A4	Keratinocyte;Keratinocyte;Keratinocyte;Keratinocyte;Keratinocyte;Keratinocyte
chr2	234399567	234399767	Enhancer	SCARNA5;DGKD;USP40;UGT1A6;AC114812.8;UGT1A4	Keratinocyte;Keratinocyte;Keratinocyte;Keratinocyte;Keratinocyte;Keratinocyte
chr2	234399785	234399985	Enhancer	SCARNA5;DGKD;USP40;UGT1A6;AC114812.8;UGT1A4	Keratinocyte;Keratinocyte;Keratinocyte;Keratinocyte;Keratinocyte;Keratinocyte
chr2	234399985	234400185	Enhancer	SCARNA5;DGKD;UGT1A6;UGT1A4	Keratinocyte;Keratinocyte;Keratinocyte;Keratinocyte
chr2	234401788	234401988	Enhancer	SCARNA5;DGKD;UGT1A6;UGT1A4	Keratinocyte;Keratinocyte;Keratinocyte;Keratinocyte
chr2	234465959	234466159	Enhancer	ATG16L1;SCARNA5;SCARNA6;USP40;UGT1A8;AC114812.8;UGT1A4;RPL17P11;UGT1A3;DNAJB3;UGT1A2P;UGT1A1;HJURP;MSL3P1	Keratinocyte;Keratinocyte;Keratinocyte;Keratinocyte;Keratinocyte;Keratinocyte;Keratinocyte;Keratinocyte;Keratinocyte;Keratinocyte;Keratinocyte;Keratinocyte;Keratinocyte;Keratinocyte
chr2	234670184	234670384	Enhancer	SCARNA5;DGKD;USP40;UGT1A8;UGT1A10;UGT1A9;UGT1A7;UGT1A6;UGT1A4;RPL17P11;AC114812.9;DNAJB3;UGT1A2P;AC114812.10;AC114812.5;UGT1A1;HEATR7B1;HJURP;AC097713.5	Keratinocyte;Keratinocyte;Keratinocyte;Keratinocyte;Keratinocyte;Keratinocyte;Keratinocyte;Keratinocyte;Keratinocyte;Keratinocyte;Keratinocyte;Keratinocyte;Keratinocyte;Keratinocyte;Keratinocyte;Keratinocyte;Keratinocyte;Keratinocyte;Keratinocyte
chr2	234670419	234670619	Enhancer	SCARNA5;DGKD;USP40;UGT1A8;UGT1A10;UGT1A9;UGT1A7;UGT1A6;UGT1A4;RPL17P11;AC114812.9;DNAJB3;UGT1A2P;AC114812.10;AC114812.5;UGT1A1;HEATR7B1;HJURP;AC097713.5	Keratinocyte;Keratinocyte;Keratinocyte;Keratinocyte;Keratinocyte;Keratinocyte;Keratinocyte;Keratinocyte;Keratinocyte;Keratinocyte;Keratinocyte;Keratinocyte;Keratinocyte;Keratinocyte;Keratinocyte;Keratinocyte;Keratinocyte;Keratinocyte;Keratinocyte
chr2	235100499	235100699	Enhancer	HJURP;MSL3P1;AC097713.2;ARL4C	Keratinocyte;Keratinocyte;Keratinocyte;Keratinocyte
chr2	235111716	235111916	Enhancer	MSL3P1;AC097713.2;ARL4C	Keratinocyte;Keratinocyte;Keratinocyte
chr2	235111738	235111938	Enhancer	MSL3P1;AC097713.2;ARL4C	Keratinocyte;Keratinocyte;Keratinocyte
chr2	235112030	235112230	Enhancer	MSL3P1;AC097713.2;ARL4C	Keratinocyte;Keratinocyte;Keratinocyte
chr2	235150691	235150891	Enhancer	MSL3P1;AC097713.5;AC097713.2;ARL4C	Keratinocyte;Keratinocyte;Keratinocyte;Keratinocyte
chr2	235594990	235595190	Enhancer	AC097713.5	Keratinocyte
chr2	235879189	235879389	Enhancer	AC010148.1;SH3BP4	Keratinocyte;Keratinocyte
chr2	235917542	235917742	Enhancer	AC010148.1;SH3BP4	Keratinocyte;Keratinocyte
chr2	236656757	236656957	Enhancer	AGAP1	Keratinocyte
chr2	236768449	236768649	Enhancer	AGAP1	Keratinocyte
chr2	236954346	236954546	Enhancer	AC079135.1;GBX2	Keratinocyte;Keratinocyte
chr2	237357796	237357996	Enhancer	CXCR7;COPS8	Keratinocyte;Keratinocyte
chr2	237588702	237588902	Enhancer	IQCA1;CXCR7;COPS8	Keratinocyte;Keratinocyte;Keratinocyte
chr2	237640491	237640691	Enhancer	CXCR7;COPS8	Keratinocyte;Keratinocyte
chr2	237641000	237641200	Enhancer	CXCR7;COPS8	Keratinocyte;Keratinocyte
chr2	237654535	237654735	Enhancer	CXCR7;AC011286.1;COPS8	Keratinocyte;Keratinocyte;Keratinocyte
chr2	237679226	237679426	Enhancer	IQCA1;CXCR7;COPS8	Keratinocyte;Keratinocyte;Keratinocyte
chr2	238005712	238005912	Enhancer	CXCR7;COPS8;AC105760.2;AC107079.1	Keratinocyte;Keratinocyte;Keratinocyte;Keratinocyte
chr2	238263787	238263987	Enhancer	COL6A3;LRRFIP1	HUVEC;HUVEC
chr2	238263991	238264191	Enhancer	COL6A3;LRRFIP1	HUVEC;HUVEC
chr2	238264296	238264496	Enhancer	COL6A3;LRRFIP1	HUVEC;HUVEC
chr2	238498823	238499023	Enhancer	AC104667.3;RAB17;LRRFIP1;RBM44;RAMP1;UBE2F	Keratinocyte;Keratinocyte;Keratinocyte;Keratinocyte;Keratinocyte;Keratinocyte
chr2	238804415	238804615	Enhancer	LRRFIP1;RAMP1;RP11;SCLY;ESPNL;ILKAP	Keratinocyte;Keratinocyte;Keratinocyte;Keratinocyte;Keratinocyte;Keratinocyte
chr2	238805157	238805357	Enhancer	LRRFIP1;RAMP1;RP11;SCLY;ESPNL;ILKAP	Keratinocyte;Keratinocyte;Keratinocyte;Keratinocyte;Keratinocyte;Keratinocyte
chr2	239171620	239171820	Enhancer	UBE2F;SCLY;FAM132B;HES6;PER2;ASB1	HUVEC;HUVEC;HUVEC;HUVEC;HUVEC;HUVEC
chr2	239171984	239172184	Enhancer	UBE2F;SCLY;FAM132B;HES6;PER2;ASB1	HUVEC;HUVEC;HUVEC;HUVEC;HUVEC;HUVEC
chr2	239175729	239175929	Enhancer	LRRFIP1;UBE2F;PER2	Keratinocyte;Keratinocyte;Keratinocyte
chr2	239230245	239230445	Enhancer	UBE2F;PER2;TRAF3IP1	Keratinocyte;Keratinocyte;Keratinocyte
chr2	239343699	239343899	Enhancer	UBE2F;ASB1;AC016999.2;AC092619.1	Keratinocyte;Keratinocyte;Keratinocyte;Keratinocyte
chr2	240588279	240588479	Enhancer	NDUFA10	Keratinocyte
chr2	240906505	240906705	Enhancer	NDUFA10;MYEOV2	Keratinocyte;Keratinocyte
chr2	241195382	241195582	Enhancer	DUSP28;RNPEPL1;CAPN10	Keratinocyte;Keratinocyte;Keratinocyte
chr2	241195484	241195684	Enhancer	DUSP28;RNPEPL1;CAPN10	Keratinocyte;Keratinocyte;Keratinocyte
chr2	241195513	241195713	Enhancer	DUSP28;RNPEPL1;CAPN10	Keratinocyte;Keratinocyte;Keratinocyte
chr2	241195687	241195887	Enhancer	DUSP28;RNPEPL1;CAPN10	Keratinocyte;Keratinocyte;Keratinocyte
chr2	241263738	241263938	Enhancer	NDUFA10;AC110619.1;DUSP28;CAPN10	Keratinocyte;Keratinocyte;Keratinocyte;Keratinocyte
chr2	241381527	241381727	Enhancer	GPC1;AC110619.1;AC110619.2;DUSP28;RNPEPL1;ANKMY1;RP11;CAPN10;GPR35	Keratinocyte;Keratinocyte;Keratinocyte;Keratinocyte;Keratinocyte;Keratinocyte;Keratinocyte;Keratinocyte;Keratinocyte
chr2	241386746	241386946	Enhancer	GPC1;AC110619.1;AC110619.2;ANKMY1;RP11;CAPN10	Keratinocyte;Keratinocyte;Keratinocyte;Keratinocyte;Keratinocyte;Keratinocyte
chr2	242000805	242001005	Enhancer	MTERFD2;PPP1R7;SEPT2;HDLBP;AC005104.3;FARP2	Keratinocyte;Keratinocyte;Keratinocyte;Keratinocyte;Keratinocyte;Keratinocyte
chr2	242040740	242040940	Enhancer	MTERFD2;PPP1R7;PASK;SEPT2;HDLBP;STK25	Keratinocyte;Keratinocyte;Keratinocyte;Keratinocyte;Keratinocyte;Keratinocyte
chr2	242311745	242311945	Enhancer	MTERFD2;PPP1R7;PASK;ANO7;SEPT2;HDLBP;AC005104.3;FARP2;STK25;BOK;BOK	Keratinocyte;Keratinocyte;Keratinocyte;Keratinocyte;Keratinocyte;Keratinocyte;Keratinocyte;Keratinocyte;Keratinocyte;Keratinocyte;Keratinocyte
chr2	242311946	242312146	Enhancer	MTERFD2;PPP1R7;PASK;ANO7;SEPT2;HDLBP;AC005104.3;FARP2;STK25;BOK;BOK	Keratinocyte;Keratinocyte;Keratinocyte;Keratinocyte;Keratinocyte;Keratinocyte;Keratinocyte;Keratinocyte;Keratinocyte;Keratinocyte;Keratinocyte
chr2	242491622	242491822	Enhancer	MTERFD2;PPP1R7;SEPT2;HDLBP;AC005104.3;FARP2;AC110299.5;STK25;BOK;BOK;ATG4B;DTYMK;ING5;D2HGDH	Keratinocyte;Keratinocyte;Keratinocyte;Keratinocyte;Keratinocyte;Keratinocyte;Keratinocyte;Keratinocyte;Keratinocyte;Keratinocyte;Keratinocyte;Keratinocyte;Keratinocyte;Keratinocyte
chr2	242491844	242492044	Enhancer	MTERFD2;PPP1R7;SEPT2;HDLBP;AC005104.3;FARP2;AC110299.5;STK25;BOK;BOK;ATG4B;DTYMK;ING5;D2HGDH	Keratinocyte;Keratinocyte;Keratinocyte;Keratinocyte;Keratinocyte;Keratinocyte;Keratinocyte;Keratinocyte;Keratinocyte;Keratinocyte;Keratinocyte;Keratinocyte;Keratinocyte;Keratinocyte
chr2	242625339	242625539	Enhancer	SEPT2;HDLBP;AC005104.3;FARP2;AC110299.5;STK25;ATG4B;THAP4;DTYMK;AC133528.2;ING5;D2HGDH;AC114730.8;AC114730.7;NEU4	Keratinocyte;Keratinocyte;Keratinocyte;Keratinocyte;Keratinocyte;Keratinocyte;Keratinocyte;Keratinocyte;Keratinocyte;Keratinocyte;Keratinocyte;Keratinocyte;Keratinocyte;Keratinocyte;Keratinocyte
chr3	4459258	4459458	Enhancer	SETMAR;SUMF1;AC024168.2;ITPR1	Keratinocyte;Keratinocyte;Keratinocyte;Keratinocyte
chr3	4624032	4624232	Enhancer	SETMAR;BHLHE40;ARL8B;EDEM1	Keratinocyte;Keratinocyte;Keratinocyte;Keratinocyte
chr3	4729931	4730131	Enhancer	SETMAR;BHLHE40;ARL8B;EDEM1	Keratinocyte;Keratinocyte;Keratinocyte;Keratinocyte
chr3	4778221	4778421	Enhancer	SUMF1;EGOT;BHLHE40;ARL8B;EDEM1	Keratinocyte;Keratinocyte;Keratinocyte;Keratinocyte;Keratinocyte
chr3	5041628	5041828	Enhancer	BHLHE40;AC018816.4;EDEM1	Keratinocyte;Keratinocyte;Keratinocyte
chr3	5043850	5044050	Enhancer	BHLHE40;AC018816.4;EDEM1	Keratinocyte;Keratinocyte;Keratinocyte
chr3	5114356	5114556	Enhancer	BHLHE40;AC018816.4;AC026202.3;EDEM1	Keratinocyte;Keratinocyte;Keratinocyte;Keratinocyte
chr3	5119834	5120034	Enhancer	BHLHE40;AC018816.4;ARL8B;AC026202.3;EDEM1	Keratinocyte;Keratinocyte;Keratinocyte;Keratinocyte;Keratinocyte
chr3	5119875	5120075	Enhancer	BHLHE40;AC018816.4;ARL8B;AC026202.3;EDEM1	Keratinocyte;Keratinocyte;Keratinocyte;Keratinocyte;Keratinocyte
chr3	5254657	5254857	Enhancer	BHLHE40;AC018816.4;ARL8B;AC026202.3;EDEM1	Keratinocyte;Keratinocyte;Keratinocyte;Keratinocyte;Keratinocyte
chr3	9214733	9214933	Enhancer	SRGAP3;PGAM1P4;THUMPD3;SRGAP3;RP11;SETD5;RP11	Keratinocyte;Keratinocyte;Keratinocyte;Keratinocyte;Keratinocyte;Keratinocyte;Keratinocyte
chr3	9216769	9216969	Enhancer	SRGAP3;PGAM1P4;THUMPD3;SRGAP3;RP11;SETD5;RP11	Keratinocyte;Keratinocyte;Keratinocyte;Keratinocyte;Keratinocyte;Keratinocyte;Keratinocyte
chr3	9289793	9289993	Enhancer	RAD18;SETD5;RP11;MTMR14	Keratinocyte;Keratinocyte;Keratinocyte;Keratinocyte
chr3	10127460	10127660	Enhancer	JAGN1;IL17RE;TMEM111;AC034193.7;C3orf24;BRK1;VHL;IRAK2;TATDN2;SEC13	Keratinocyte;Keratinocyte;Keratinocyte;Keratinocyte;Keratinocyte;Keratinocyte;Keratinocyte;Keratinocyte;Keratinocyte;Keratinocyte
chr3	10240218	10240418	Enhancer	ARPC4;TADA3;TTLL3;RPUSD3;JAGN1;IL17RE;IL17RC;CRELD1;AC034193.5;AC022007.4;TMEM111;AC022007.5;CIDECP;FANCD2;AC034193.7;C3orf24;BRK1;VHL;IRAK2;TATDN2;GHRLOS2;GHRL	Keratinocyte;Keratinocyte;Keratinocyte;Keratinocyte;Keratinocyte;Keratinocyte;Keratinocyte;Keratinocyte;Keratinocyte;Keratinocyte;Keratinocyte;Keratinocyte;Keratinocyte;Keratinocyte;Keratinocyte;Keratinocyte;Keratinocyte;Keratinocyte;Keratinocyte;Keratinocyte;Keratinocyte;Keratinocyte
chr3	11603104	11603304	Enhancer	HRH1;AC083855.4;ATG7;VGLL4;TAMM41	Keratinocyte;Keratinocyte;Keratinocyte;Keratinocyte;Keratinocyte
chr3	11859513	11859713	Enhancer	AC083855.4;TAMM41;AC090958.1	Keratinocyte;Keratinocyte;Keratinocyte
chr3	11860623	11860823	Enhancer	AC083855.4;TAMM41;AC090958.1	Keratinocyte;Keratinocyte;Keratinocyte
chr3	12586268	12586468	Enhancer	AC091492.2;TSEN2;MKRN2;MKRN2;RAF1;TMEM40;KRT18P17;CAND2;SNORA7A;RPL32;RP11	Keratinocyte;Keratinocyte;Keratinocyte;Keratinocyte;Keratinocyte;Keratinocyte;Keratinocyte;Keratinocyte;Keratinocyte;Keratinocyte;Keratinocyte
chr3	12792503	12792703	Enhancer	AC091492.2;TSEN2;MKRN2;MKRN2;RAF1;TMEM40;KRT18P17;CAND2;SNORA7A;RPL32;RP11	Keratinocyte;Keratinocyte;Keratinocyte;Keratinocyte;Keratinocyte;Keratinocyte;Keratinocyte;Keratinocyte;Keratinocyte;Keratinocyte;Keratinocyte
chr3	13664380	13664580	Enhancer	FBLN2;WNT7A	Keratinocyte;Keratinocyte
chr3	13664908	13665108	Enhancer	FBLN2;WNT7A	Keratinocyte;Keratinocyte
chr3	13881354	13881554	Enhancer	WNT7A;VN1R20P;RP11;TPRXL;TMEM43;AC093495.4;LSM3;XPC;SLC6A6	Keratinocyte;Keratinocyte;Keratinocyte;Keratinocyte;Keratinocyte;Keratinocyte;Keratinocyte;Keratinocyte;Keratinocyte
chr3	13933360	13933560	Enhancer	WNT7A;LSM3;XPC	Keratinocyte;Keratinocyte;Keratinocyte
chr3	14058834	14059034	Enhancer	LSM3;XPC;SLC6A6	Keratinocyte;Keratinocyte;Keratinocyte
chr3	14212195	14212395	Enhancer	WNT7A;VN1R21P;CHCHD4;TMEM43;AC093495.4;LSM3;XPC	Keratinocyte;Keratinocyte;Keratinocyte;Keratinocyte;Keratinocyte;Keratinocyte;Keratinocyte
chr3	14241068	14241268	Enhancer	WNT7A;CHCHD4;TMEM43;AC093495.4;LSM3;XPC;AC090952.4	Keratinocyte;Keratinocyte;Keratinocyte;Keratinocyte;Keratinocyte;Keratinocyte;Keratinocyte
chr3	14241319	14241519	Enhancer	WNT7A;CHCHD4;TMEM43;AC093495.4;LSM3;XPC;AC090952.4	Keratinocyte;Keratinocyte;Keratinocyte;Keratinocyte;Keratinocyte;Keratinocyte;Keratinocyte
chr3	14242691	14242891	Enhancer	WNT7A;CHCHD4;TMEM43;AC093495.4;LSM3;XPC	Keratinocyte;Keratinocyte;Keratinocyte;Keratinocyte;Keratinocyte;Keratinocyte
chr3	14522048	14522248	Enhancer	TMEM43	Keratinocyte
chr3	14949350	14949550	Enhancer	FGD5;MRPS25;ZFYVE20	HUVEC;HUVEC;HUVEC
chr3	15916402	15916602	Enhancer	AC090945.1	Keratinocyte
chr3	16412417	16412617	Enhancer	DPH3;OXNAD1;RFTN1	Keratinocyte;Keratinocyte;Keratinocyte
chr3	23536863	23537063	Enhancer	UBE2E1	Keratinocyte
chr3	23661275	23661475	Enhancer	RPL15;NR1D2;NKIRAS1	Keratinocyte;Keratinocyte;Keratinocyte
chr3	24101546	24101746	Enhancer	UBE2E1;AC124914.3;RPL15;NR1D2	Keratinocyte;Keratinocyte;Keratinocyte;Keratinocyte
chr3	27257989	27258189	Enhancer	AC093555.1;AC099535.4;AC098614.2	Keratinocyte;Keratinocyte;Keratinocyte
chr3	27391522	27391722	Enhancer	NEK10;AC098614.2	Keratinocyte;Keratinocyte
chr3	27472728	27472928	Enhancer	AC099535.3;AC099535.4	Keratinocyte;Keratinocyte
chr3	27610049	27610249	Enhancer	AC099535.4	Keratinocyte
chr3	30230138	30230338	Enhancer	TGFBR2;AC096921.2	Keratinocyte;Keratinocyte
chr3	31238940	31239140	Enhancer	TGFBR2;THRAP3P1;STT3B	Keratinocyte;Keratinocyte;Keratinocyte
chr3	31774783	31774983	Enhancer	STT3B	HUVEC
chr3	31933756	31933956	Enhancer	STT3B;OSBPL10;ZNF587P1;ZNF860;OSBPL10;GPD1L;AC097639.8;KRT18P15;CMTM7	Keratinocyte;Keratinocyte;Keratinocyte;Keratinocyte;Keratinocyte;Keratinocyte;Keratinocyte;Keratinocyte;Keratinocyte
chr3	32077688	32077888	Enhancer	THRAP3P1;STT3B;ZNF860;RPL21P40;OSBPL10;GPD1L;AC094019.4;AC097639.8;CMTM8;KRT18P15;CMTM7;AC138972.1	Keratinocyte;Keratinocyte;Keratinocyte;Keratinocyte;Keratinocyte;Keratinocyte;Keratinocyte;Keratinocyte;Keratinocyte;Keratinocyte;Keratinocyte;Keratinocyte
chr3	32086760	32086960	Enhancer	THRAP3P1;STT3B;OSBPL10;ZNF860;RPL21P40;OSBPL10;GPD1L;AC094019.4;CMTM7	Keratinocyte;Keratinocyte;Keratinocyte;Keratinocyte;Keratinocyte;Keratinocyte;Keratinocyte;Keratinocyte;Keratinocyte
chr3	32318071	32318271	Enhancer	ZNF860;RP11;CMTM8;KRT18P15;CMTM6;AC104306.1;DYNC1LI1;IGBP1P3;AC138972.1;CNOT10	Keratinocyte;Keratinocyte;Keratinocyte;Keratinocyte;Keratinocyte;Keratinocyte;Keratinocyte;Keratinocyte;Keratinocyte;Keratinocyte
chr3	33005426	33005626	Enhancer	AC112211.2;AC112211.3;TMPPE;GLB1;CRTAP;FBXL2	Keratinocyte;Keratinocyte;Keratinocyte;Keratinocyte;Keratinocyte;Keratinocyte
chr3	33074471	33074671	Enhancer	AC112211.2;AC112211.3;TMPPE;GLB1;CRTAP;SUSD5;FBXL2;UBP1	Keratinocyte;Keratinocyte;Keratinocyte;Keratinocyte;Keratinocyte;Keratinocyte;Keratinocyte;Keratinocyte
chr3	37010870	37011070	Enhancer	AC011816.3;MLH1;AC011816.4	Keratinocyte;Keratinocyte;Keratinocyte
chr3	37262768	37262968	Enhancer	UBE2D3P2;AC126118.1;AC097359.2;AC097359.1;TCEA1P2	Keratinocyte;Keratinocyte;Keratinocyte;Keratinocyte;Keratinocyte
chr3	39186629	39186829	Enhancer	WDR48;GORASP1;CSRNP1	Keratinocyte;Keratinocyte;Keratinocyte
chr3	40407762	40407962	Enhancer	EIF1B;ENTPD3;RPL14	Keratinocyte;Keratinocyte;Keratinocyte
chr3	40519258	40519458	Enhancer	ENTPD3;RPL14;ZNF619	Keratinocyte;Keratinocyte;Keratinocyte
chr3	40519312	40519512	Enhancer	ENTPD3;RPL14;ZNF619	Keratinocyte;Keratinocyte;Keratinocyte
chr3	42162523	42162723	Enhancer	ULK4;RP11;TRAK1;RP11;RP11;CCK;RP11;VIPR1;SS18L2;NKTR;SEC22C	Keratinocyte;Keratinocyte;Keratinocyte;Keratinocyte;Keratinocyte;Keratinocyte;Keratinocyte;Keratinocyte;Keratinocyte;Keratinocyte;Keratinocyte
chr3	42162532	42162732	Enhancer	ULK4;RP11;TRAK1;RP11;RP11;CCK;RP11;VIPR1;SS18L2;NKTR;SEC22C	Keratinocyte;Keratinocyte;Keratinocyte;Keratinocyte;Keratinocyte;Keratinocyte;Keratinocyte;Keratinocyte;Keratinocyte;Keratinocyte;Keratinocyte
chr3	42193261	42193461	Enhancer	ULK4;RP11;TRAK1;RP11;RP11;CCK;EIF4BP4;RP11;VIPR1;SS18L2;NKTR;SEC22C	Keratinocyte;Keratinocyte;Keratinocyte;Keratinocyte;Keratinocyte;Keratinocyte;Keratinocyte;Keratinocyte;Keratinocyte;Keratinocyte;Keratinocyte;Keratinocyte
chr3	42518297	42518497	Enhancer	TRAK1;RP11;RP11;SS18L2;NKTR;SEC22C;ZBTB47;RP4;HIGD1A;KRBOX1;HNRNPA1P22;ZNF662	Keratinocyte;Keratinocyte;Keratinocyte;Keratinocyte;Keratinocyte;Keratinocyte;Keratinocyte;Keratinocyte;Keratinocyte;Keratinocyte;Keratinocyte;Keratinocyte
chr3	44927945	44928145	Enhancer	RP11;ZNF502;TMEM42;MIR564;TGM4;EXOSC7;ZDHHC3;CLEC3B;CDCP1;AC010170.1;TMEM158	HUVEC,Keratinocyte;HUVEC;HUVEC,Keratinocyte;HUVEC;HUVEC,Keratinocyte;HUVEC,Keratinocyte;Keratinocyte;Keratinocyte;Keratinocyte;Keratinocyte;Keratinocyte
chr3	44994377	44994577	Enhancer	RP11;ZNF197;ZNF35;RP11;RP11;TMEM42;TGM4;EXOSC7;ZDHHC3;CLEC3B;CDCP1;RP11;AC010170.1;TMEM158;LARS2	Keratinocyte;Keratinocyte;Keratinocyte;Keratinocyte;Keratinocyte;Keratinocyte;Keratinocyte;Keratinocyte;Keratinocyte;Keratinocyte;Keratinocyte;Keratinocyte;Keratinocyte;Keratinocyte;Keratinocyte
chr3	45052789	45052989	Enhancer	ZNF35;ZNF501;KIAA1143;KIF15;TMEM42;MIR564;TGM4;EXOSC7;ZDHHC3;CLEC3B;CDCP1;RP11;AC010170.1;TMEM158;LARS2	HUVEC;HUVEC;HUVEC;HUVEC;HUVEC,Keratinocyte;HUVEC;HUVEC,Keratinocyte;HUVEC,Keratinocyte;HUVEC,Keratinocyte;HUVEC,Keratinocyte;HUVEC,Keratinocyte;HUVEC,Keratinocyte;Keratinocyte;Keratinocyte;Keratinocyte
chr3	45161774	45161974	Enhancer	RP11;ZNF502;ZNF501;KIAA1143;TMEM42;EXOSC7;ZDHHC3;CLEC3B;CDCP1;RP11;AC010170.1;TMEM158;LARS2;LIMD1;SACM1L	Keratinocyte;Keratinocyte;Keratinocyte;Keratinocyte;Keratinocyte;Keratinocyte;Keratinocyte;Keratinocyte;Keratinocyte;Keratinocyte;Keratinocyte;Keratinocyte;Keratinocyte;Keratinocyte;Keratinocyte
chr3	45241497	45241697	Enhancer	RP11;TMEM42;TGM4;EXOSC7;ZDHHC3;CDCP1;RP11;AC010170.1;TMEM158;LIMD1	Keratinocyte;Keratinocyte;Keratinocyte;Keratinocyte;Keratinocyte;Keratinocyte;Keratinocyte;Keratinocyte;Keratinocyte;Keratinocyte
chr3	46464157	46464357	Enhancer	RP11	Keratinocyte
chr3	46607250	46607450	Enhancer	LRRC2;ALS2CL;NBEAL2;CCDC12	Keratinocyte;Keratinocyte;Keratinocyte;Keratinocyte
chr3	47332456	47332656	Enhancer	NBEAL2;CCDC12;KLHL18;KIF9;RP11;PTPN23;SCAP;C3orf75;RP11	Keratinocyte;Keratinocyte;Keratinocyte;Keratinocyte;Keratinocyte;Keratinocyte;Keratinocyte;Keratinocyte;Keratinocyte
chr3	47484391	47484591	Enhancer	SCAP;C3orf75;AC112512.1;RP11;SMARCC1;DHX30	Keratinocyte;Keratinocyte;Keratinocyte;Keratinocyte;Keratinocyte;Keratinocyte
chr3	47484413	47484613	Enhancer	SCAP;C3orf75;AC112512.1;RP11;SMARCC1;DHX30	Keratinocyte;Keratinocyte;Keratinocyte;Keratinocyte;Keratinocyte;Keratinocyte
chr3	47484553	47484753	Enhancer	SCAP;C3orf75;AC112512.1;RP11;SMARCC1;DHX30	Keratinocyte;Keratinocyte;Keratinocyte;Keratinocyte;Keratinocyte;Keratinocyte
chr3	47484809	47485009	Enhancer	SCAP;C3orf75;AC112512.1;RP11;SMARCC1;DHX30	Keratinocyte;Keratinocyte;Keratinocyte;Keratinocyte;Keratinocyte;Keratinocyte
chr3	47485144	47485344	Enhancer	SCAP;C3orf75;AC112512.1;RP11;SMARCC1;DHX30	Keratinocyte;Keratinocyte;Keratinocyte;Keratinocyte;Keratinocyte;Keratinocyte
chr3	48128569	48128769	Enhancer	RP11;SMARCC1;DHX30;MAP4;RP11;SNRPFP4;NDUFB1P1;CDC25A;CAMP;ZNF589;MRPS18AP1;CTD;NME6;PLXNB1;CCDC72;CCDC51;ATRIP;TREX1;SHISA5;UQCRC1;IP6K2	Keratinocyte;Keratinocyte;Keratinocyte;Keratinocyte;Keratinocyte;Keratinocyte;Keratinocyte;Keratinocyte;Keratinocyte;Keratinocyte;Keratinocyte;Keratinocyte;Keratinocyte;Keratinocyte;Keratinocyte;Keratinocyte;Keratinocyte;Keratinocyte;Keratinocyte;Keratinocyte;Keratinocyte
chr3	48196751	48196951	Enhancer	SMARCC1;DHX30;MAP4;SNRPFP4;NDUFB1P1;CDC25A;MRPS18AP1;NME6;PLXNB1;CCDC72;CCDC51;ATRIP;TREX1;SHISA5;PFKFB4;UCN2;IP6K2	Keratinocyte;Keratinocyte;Keratinocyte;Keratinocyte;Keratinocyte;Keratinocyte;Keratinocyte;Keratinocyte;Keratinocyte;Keratinocyte;Keratinocyte;Keratinocyte;Keratinocyte;Keratinocyte;Keratinocyte;Keratinocyte;Keratinocyte
chr3	48466525	48466725	Enhancer	ZNF589;Y;FBXW12;PLXNB1;CCDC72;CCDC51;RP11;ATRIP;TREX1;SHISA5;PFKFB4;COL7A1;UQCRC1;SLC26A6;CELSR3;MRPS18AP1;UCN2;NCKIPSD;IP6K2;PRKAR2A;ARIH2;IMPDH2	HUVEC,Keratinocyte;HUVEC;HUVEC;HUVEC,Keratinocyte;HUVEC,Keratinocyte;HUVEC,Keratinocyte;HUVEC,Keratinocyte;HUVEC,Keratinocyte;HUVEC,Keratinocyte;HUVEC,Keratinocyte;HUVEC,Keratinocyte;HUVEC,Keratinocyte;HUVEC,Keratinocyte;HUVEC,Keratinocyte;HUVEC;Keratinocyte;Keratinocyte;Keratinocyte;Keratinocyte;Keratinocyte;Keratinocyte;Keratinocyte
chr3	48466600	48466800	Enhancer	ZNF589;Y;FBXW12;PLXNB1;CCDC72;CCDC51;RP11;ATRIP;TREX1;SHISA5;PFKFB4;COL7A1;UQCRC1;SLC26A6;CELSR3;MRPS18AP1;UCN2;NCKIPSD;IP6K2;PRKAR2A;ARIH2;IMPDH2;MAP4;NDUFB1P1;CAMP;CTD;TMEM89;WDR6	HUVEC,Keratinocyte;HUVEC;HUVEC,Keratinocyte;HUVEC,Keratinocyte;HUVEC,Keratinocyte;HUVEC,Keratinocyte;HUVEC,Keratinocyte;HUVEC,Keratinocyte;HUVEC,Keratinocyte;HUVEC,Keratinocyte;HUVEC,Keratinocyte;HUVEC,Keratinocyte;HUVEC,Keratinocyte;HUVEC,Keratinocyte;HUVEC,Keratinocyte;Keratinocyte;Keratinocyte;Keratinocyte;Keratinocyte;Keratinocyte;Keratinocyte;Keratinocyte;Keratinocyte;Keratinocyte;Keratinocy…
chr3	48466651	48466851	Enhancer	ZNF589;Y;FBXW12;PLXNB1;CCDC72;CCDC51;RP11;ATRIP;TREX1;SHISA5;PFKFB4;COL7A1;UQCRC1;SLC26A6;CELSR3;MRPS18AP1;UCN2;NCKIPSD;IP6K2;PRKAR2A;ARIH2;IMPDH2;MAP4;NDUFB1P1;CAMP;CTD;TMEM89;WDR6	HUVEC,Keratinocyte;HUVEC;HUVEC,Keratinocyte;HUVEC,Keratinocyte;HUVEC,Keratinocyte;HUVEC,Keratinocyte;HUVEC,Keratinocyte;HUVEC,Keratinocyte;HUVEC,Keratinocyte;HUVEC,Keratinocyte;HUVEC,Keratinocyte;HUVEC,Keratinocyte;HUVEC,Keratinocyte;HUVEC,Keratinocyte;HUVEC,Keratinocyte;Keratinocyte;Keratinocyte;Keratinocyte;Keratinocyte;Keratinocyte;Keratinocyte;Keratinocyte;Keratinocyte;Keratinocyte;Keratinocy…
chr3	48467883	48468083	Enhancer	MAP4;RP11;NDUFB1P1;CAMP;ZNF589;MRPS18AP1;CTD;FBXW12;PLXNB1;CCDC72;CCDC51;RP11;ATRIP;TREX1;SHISA5;PFKFB4;UCN2;COL7A1;UQCRC1;TMEM89;SLC26A6;CELSR3;NCKIPSD;IP6K2;PRKAR2A;ARIH2;WDR6;IMPDH2	Keratinocyte;Keratinocyte;Keratinocyte;Keratinocyte;Keratinocyte;Keratinocyte;Keratinocyte;Keratinocyte;Keratinocyte;Keratinocyte;Keratinocyte;Keratinocyte;Keratinocyte;Keratinocyte;Keratinocyte;Keratinocyte;Keratinocyte;Keratinocyte;Keratinocyte;Keratinocyte;Keratinocyte;Keratinocyte;Keratinocyte;Keratinocyte;Keratinocyte;Keratinocyte;Keratinocyte;Keratinocyte
chr3	48559230	48559430	Enhancer	Y;CTD;NME6;CCDC72;CCDC51;RP11;ATRIP;TREX1;SHISA5;UQCRC1;IP6K2	HUVEC;HUVEC;HUVEC;HUVEC;HUVEC;HUVEC;HUVEC;HUVEC;HUVEC;HUVEC;HUVEC
chr3	48631734	48631934	Enhancer	NDUFB1P1;CAMP;ZNF589;MRPS18AP1;FBXW12;PLXNB1;CCDC72;CCDC51;RP11;ATRIP;TREX1;SHISA5;PFKFB4;UCN2;COL7A1;UQCRC1;TMEM89;SLC26A6;CELSR3;NCKIPSD;IP6K2;PRKAR2A;PRKAR2A;SLC25A20;ARIH2;C3orf71;RP13;WDR6;NDUFAF3;DALRD3;IMPDH2;QRICH1;QARS;KLHDC8B	Keratinocyte;Keratinocyte;Keratinocyte;Keratinocyte;Keratinocyte;Keratinocyte;Keratinocyte;Keratinocyte;Keratinocyte;Keratinocyte;Keratinocyte;Keratinocyte;Keratinocyte;Keratinocyte;Keratinocyte;Keratinocyte;Keratinocyte;Keratinocyte;Keratinocyte;Keratinocyte;Keratinocyte;Keratinocyte;Keratinocyte;Keratinocyte;Keratinocyte;Keratinocyte;Keratinocyte;Keratinocyte;Keratinocyte;Keratinocyte;Keratinoc…
chr3	48631858	48632058	Enhancer	NDUFB1P1;CAMP;ZNF589;MRPS18AP1;FBXW12;PLXNB1;CCDC72;CCDC51;RP11;ATRIP;TREX1;SHISA5;PFKFB4;UCN2;COL7A1;UQCRC1;TMEM89;SLC26A6;CELSR3;NCKIPSD;IP6K2;PRKAR2A;PRKAR2A;SLC25A20;ARIH2;RP13;WDR6;NDUFAF3;DALRD3;IMPDH2;QRICH1;QARS;KLHDC8B	Keratinocyte;Keratinocyte;Keratinocyte;Keratinocyte;Keratinocyte;Keratinocyte;Keratinocyte;Keratinocyte;Keratinocyte;Keratinocyte;Keratinocyte;Keratinocyte;Keratinocyte;Keratinocyte;Keratinocyte;Keratinocyte;Keratinocyte;Keratinocyte;Keratinocyte;Keratinocyte;Keratinocyte;Keratinocyte;Keratinocyte;Keratinocyte;Keratinocyte;Keratinocyte;Keratinocyte;Keratinocyte;Keratinocyte;Keratinocyte;Keratinoc…
chr3	48746146	48746346	Enhancer	NDUFB1P1;MRPS18AP1;NME6;PLXNB1;CCDC72;CCDC51;ATRIP;TREX1;SHISA5;PFKFB4;UCN2;COL7A1;UQCRC1;TMEM89;SLC26A6;CELSR3;NCKIPSD;IP6K2;PRKAR2A;PRKAR2A;SLC25A20;ARIH2;C3orf71;RP13;RP13;WDR6;NDUFAF3;DALRD3;IMPDH2;QRICH1;QARS;USP19;GPX1	Keratinocyte;Keratinocyte;Keratinocyte;Keratinocyte;Keratinocyte;Keratinocyte;Keratinocyte;Keratinocyte;Keratinocyte;Keratinocyte;Keratinocyte;Keratinocyte;Keratinocyte;Keratinocyte;Keratinocyte;Keratinocyte;Keratinocyte;Keratinocyte;Keratinocyte;Keratinocyte;Keratinocyte;Keratinocyte;Keratinocyte;Keratinocyte;Keratinocyte;Keratinocyte;Keratinocyte;Keratinocyte;Keratinocyte;Keratinocyte;Keratinoc…
chr3	48752313	48752513	Enhancer	NDUFB1P1;MRPS18AP1;CTD;NME6;FBXW12;PLXNB1;CCDC72;CCDC51;RP11;ATRIP;TREX1;SHISA5;PFKFB4;UCN2;COL7A1;UQCRC1;TMEM89;SLC26A6;CELSR3;NCKIPSD;IP6K2;PRKAR2A;SLC25A20;ARIH2;C3orf71;RP13;WDR6;NDUFAF3;DALRD3;IMPDH2;QRICH1;QARS;USP19;LAMB2;GPX1	Keratinocyte;Keratinocyte;Keratinocyte;Keratinocyte;Keratinocyte;Keratinocyte;Keratinocyte;Keratinocyte;Keratinocyte;Keratinocyte;Keratinocyte;Keratinocyte;Keratinocyte;Keratinocyte;Keratinocyte;Keratinocyte;Keratinocyte;Keratinocyte;Keratinocyte;Keratinocyte;Keratinocyte;Keratinocyte;Keratinocyte;Keratinocyte;Keratinocyte;Keratinocyte;Keratinocyte;Keratinocyte;Keratinocyte;Keratinocyte;Keratinoc…
chr3	49156607	49156807	Enhancer	PRKAR2A;ARIH2;RP13;P4HTM;RP13;WDR6;NDUFAF3;DALRD3;IMPDH2;QRICH1;QARS;USP19;LAMB2;CCDC71;KLHDC8B;CCDC36;RP11;Y;C3orf62;USP4;GPX1;COL7A1;NCKIPSD;C3orf71;AC135506.1;RHOA;TCTA;AMT;NICN1;DAG1	HUVEC;HUVEC,Keratinocyte;HUVEC,Keratinocyte;HUVEC,Keratinocyte;HUVEC,Keratinocyte;HUVEC,Keratinocyte;HUVEC,Keratinocyte;HUVEC,Keratinocyte;HUVEC,Keratinocyte;HUVEC,Keratinocyte;HUVEC,Keratinocyte;HUVEC,Keratinocyte;HUVEC,Keratinocyte;HUVEC,Keratinocyte;HUVEC,Keratinocyte;HUVEC;HUVEC;HUVEC;HUVEC;HUVEC;HUVEC,Keratinocyte;Keratinocyte;Keratinocyte;Keratinocyte;Keratinocyte;Keratinocyte;Keratinocyte;…
chr3	49157046	49157246	Enhancer	PRKAR2A;ARIH2;RP13;P4HTM;RP13;WDR6;NDUFAF3;DALRD3;IMPDH2;QRICH1;QARS;USP19;LAMB2;CCDC71;KLHDC8B;CCDC36;RP11;Y;C3orf62;USP4;GPX1;COL7A1;NCKIPSD;C3orf71;AC135506.1;RHOA;TCTA;AMT;NICN1;DAG1	HUVEC;HUVEC,Keratinocyte;HUVEC,Keratinocyte;HUVEC,Keratinocyte;HUVEC,Keratinocyte;HUVEC,Keratinocyte;HUVEC,Keratinocyte;HUVEC,Keratinocyte;HUVEC,Keratinocyte;HUVEC,Keratinocyte;HUVEC,Keratinocyte;HUVEC,Keratinocyte;HUVEC,Keratinocyte;HUVEC,Keratinocyte;HUVEC,Keratinocyte;HUVEC;HUVEC;HUVEC;HUVEC;HUVEC;HUVEC,Keratinocyte;Keratinocyte;Keratinocyte;Keratinocyte;Keratinocyte;Keratinocyte;Keratinocyte;…
chr3	49509220	49509420	Enhancer	ARIH2;WDR6;DALRD3;IMPDH2;AC135506.1;QRICH1;QARS;USP19;LAMB2;CCDC71;KLHDC8B;CCDC36;C3orf62;USP4;GPX1;RHOA;TCTA;RHOA;AMT;NICN1;NICN1;DAG1;BSN;BSN;APEH;RNF123;MST1;GMPPB	Keratinocyte;Keratinocyte;Keratinocyte;Keratinocyte;Keratinocyte;Keratinocyte;Keratinocyte;Keratinocyte;Keratinocyte;Keratinocyte;Keratinocyte;Keratinocyte;Keratinocyte;Keratinocyte;Keratinocyte;Keratinocyte;Keratinocyte;Keratinocyte;Keratinocyte;Keratinocyte;Keratinocyte;Keratinocyte;Keratinocyte;Keratinocyte;Keratinocyte;Keratinocyte;Keratinocyte;Keratinocyte
chr3	49561230	49561430	Enhancer	ARIH2;WDR6;IMPDH2;QRICH1;QARS;USP19;LAMB2;CCDC71;KLHDC8B;C3orf62;USP4;GPX1;RHOA;TCTA;RHOA;AMT;NICN1;DAG1;RBM6	Keratinocyte;Keratinocyte;Keratinocyte;Keratinocyte;Keratinocyte;Keratinocyte;Keratinocyte;Keratinocyte;Keratinocyte;Keratinocyte;Keratinocyte;Keratinocyte;Keratinocyte;Keratinocyte;Keratinocyte;Keratinocyte;Keratinocyte;Keratinocyte;Keratinocyte
chr3	49712239	49712439	Enhancer	IMPDH2;QRICH1;QARS;KLHDC8B;USP4;GPX1;TCTA;RHOA;DAG1;APEH;AC099668.5;RNF123;MST1;AMIGO3;GMPPB;IP6K1;FAM212A;UBA7;TRAIP;MST1R;RBM6;RBM5	Keratinocyte;Keratinocyte;Keratinocyte;Keratinocyte;Keratinocyte;Keratinocyte;Keratinocyte;Keratinocyte;Keratinocyte;Keratinocyte;Keratinocyte;Keratinocyte;Keratinocyte;Keratinocyte;Keratinocyte;Keratinocyte;Keratinocyte;Keratinocyte;Keratinocyte;Keratinocyte;Keratinocyte;Keratinocyte
chr3	49952441	49952641	Enhancer	FAM212A;UBA7;TRAIP;AC105935.1;CTD;CTD;MST1R;MON1A;RBM6;RBM5;SEMA3F;RP11;GNAI2;IFRD2;NAT6;HYAL3;HYAL1;HYAL2;TUSC2;RASSF1;CYB561D2;NPRL2;TMEM115	Keratinocyte;Keratinocyte;Keratinocyte;Keratinocyte;Keratinocyte;Keratinocyte;Keratinocyte;Keratinocyte;Keratinocyte;Keratinocyte;Keratinocyte;Keratinocyte;Keratinocyte;Keratinocyte;Keratinocyte;Keratinocyte;Keratinocyte;Keratinocyte;Keratinocyte;Keratinocyte;Keratinocyte;Keratinocyte;Keratinocyte
chr3	50046508	50046708	Enhancer	IP6K1;FAM212A;UBA7;TRAIP;AC105935.1;CTD;MST1R;MON1A;RBM6;RBM5;GNAI2;IFRD2;HYAL3;HYAL1;HYAL2;TUSC2;RASSF1;CYB561D2;NPRL2;TMEM115	Keratinocyte;Keratinocyte;Keratinocyte;Keratinocyte;Keratinocyte;Keratinocyte;Keratinocyte;Keratinocyte;Keratinocyte;Keratinocyte;Keratinocyte;Keratinocyte;Keratinocyte;Keratinocyte;Keratinocyte;Keratinocyte;Keratinocyte;Keratinocyte;Keratinocyte;Keratinocyte
chr3	50255195	50255395	Enhancer	RBM5;SEMA3F;RP11;GNAI2;U73169.1;IFRD2;NAT6;HYAL3;HYAL1;HYAL2;TUSC2;RASSF1;ZMYND10;ZMYND10;CYB561D2;NPRL2;TMEM115	HUVEC;HUVEC;HUVEC;HUVEC;HUVEC;HUVEC;HUVEC;HUVEC;HUVEC;HUVEC;HUVEC;HUVEC;HUVEC;HUVEC;HUVEC;HUVEC;HUVEC
chr3	50844576	50844776	Enhancer	ZNF652P1	Keratinocyte
chr3	52064558	52064758	Enhancer	RRP9;PARP3;GPR62;ABHD14A;PCBP4;ABHD14A;ACY1;RP11;ABHD14B;RPL29;DUSP7;C3orf74;POC1A;ALDOAP1;ALAS1;TWF2;RP5;PPM1M;GLYCTK;WDR82;RP11;PHF7;BAP1;NISCH	Keratinocyte;Keratinocyte;Keratinocyte;Keratinocyte;Keratinocyte;Keratinocyte;Keratinocyte;Keratinocyte;Keratinocyte;Keratinocyte;Keratinocyte;Keratinocyte;Keratinocyte;Keratinocyte;Keratinocyte;Keratinocyte;Keratinocyte;Keratinocyte;Keratinocyte;Keratinocyte;Keratinocyte;Keratinocyte;Keratinocyte;Keratinocyte
chr3	52141005	52141205	Enhancer	TEX264;RRP9;PARP3;ABHD14A;PCBP4;ACY1;RP11;ABHD14B;RPL29;RP11;TWF2;RP5;PPM1M;WDR82;PHF7;BAP1;NISCH;NT5DC2	Keratinocyte;Keratinocyte;Keratinocyte;Keratinocyte;Keratinocyte;Keratinocyte;Keratinocyte;Keratinocyte;Keratinocyte;Keratinocyte;Keratinocyte;Keratinocyte;Keratinocyte;Keratinocyte;Keratinocyte;Keratinocyte;Keratinocyte;Keratinocyte
chr3	52438406	52438606	Enhancer	ACY1;ABHD14B;RPL29;RP11;PHF7;BAP1;NISCH;C3orf78;NT5DC2;ABHD14A	Keratinocyte;Keratinocyte;Keratinocyte;Keratinocyte;Keratinocyte;Keratinocyte;Keratinocyte;Keratinocyte;Keratinocyte;Keratinocyte
chr3	52438689	52438889	Enhancer	ABHD14A;ACY1;ABHD14B;RPL29;RP11;PHF7;BAP1;NISCH	Keratinocyte;Keratinocyte;Keratinocyte;Keratinocyte;Keratinocyte;Keratinocyte;Keratinocyte;Keratinocyte
chr3	52558663	52558863	Enhancer	C3orf78;NT5DC2	Keratinocyte;Keratinocyte
chr3	53198937	53199137	Enhancer	RFT1;PRKCD;TKT;DCP1A	Keratinocyte;Keratinocyte;Keratinocyte;Keratinocyte
chr3	56625076	56625276	Enhancer	CCDC66;FAM208A	Keratinocyte;Keratinocyte
chr3	56846071	56846271	Enhancer	CCDC66;FAM208A;ARHGEF3;APPL1	Keratinocyte;Keratinocyte;Keratinocyte;Keratinocyte
chr3	56918436	56918636	Enhancer	FAM208A;ARHGEF3;APPL1	Keratinocyte;Keratinocyte;Keratinocyte
chr3	57644803	57645003	Enhancer	RNF7P1;RP11;PDE12;ARF4;FAM116A;RP11;FLNB;FLNB;ABHD6;RP11;RPP14	Keratinocyte;Keratinocyte;Keratinocyte;Keratinocyte;Keratinocyte;Keratinocyte;Keratinocyte;Keratinocyte;Keratinocyte;Keratinocyte;Keratinocyte
chr3	57769165	57769365	Enhancer	RNF7P1;RP11;DNAH12;PDE12;ARF4;FAM116A;RP11;SLMAP;FLNB;FLNB;DNASE1L3;ABHD6;RP11;RPP14;PDHB	Keratinocyte;Keratinocyte;Keratinocyte;Keratinocyte;Keratinocyte;Keratinocyte;Keratinocyte;Keratinocyte;Keratinocyte;Keratinocyte;Keratinocyte;Keratinocyte;Keratinocyte;Keratinocyte;Keratinocyte
chr3	57963565	57963765	Enhancer	RNF7P1;RP11;PDE12;ARF4;FAM116A;RP11;SLMAP;FLNB;FLNB;DNASE1L3;ABHD6;RP11;RPP14;PXK;PDHB	Keratinocyte;Keratinocyte;Keratinocyte;Keratinocyte;Keratinocyte;Keratinocyte;Keratinocyte;Keratinocyte;Keratinocyte;Keratinocyte;Keratinocyte;Keratinocyte;Keratinocyte;Keratinocyte;Keratinocyte
chr3	57975367	57975567	Enhancer	RNF7P1;RP11;PDE12;ARF4;FAM116A;RP11;SLMAP;FLNB;FLNB;DNASE1L3;ABHD6;RP11;RPP14;PXK;PDHB	Keratinocyte;Keratinocyte;Keratinocyte;Keratinocyte;Keratinocyte;Keratinocyte;Keratinocyte;Keratinocyte;Keratinocyte;Keratinocyte;Keratinocyte;Keratinocyte;Keratinocyte;Keratinocyte;Keratinocyte
chr3	58087748	58087948	Enhancer	RNF7P1;RP11;PDE12;ARF4;FAM116A;RP11;SLMAP;PPIAP16;FLNB;FLNB;DNASE1L3;ABHD6;RP11;RPP14;PXK;PDHB;KCTD6	Keratinocyte;Keratinocyte;Keratinocyte;Keratinocyte;Keratinocyte;Keratinocyte;Keratinocyte;Keratinocyte;Keratinocyte;Keratinocyte;Keratinocyte;Keratinocyte;Keratinocyte;Keratinocyte;Keratinocyte;Keratinocyte;Keratinocyte
chr3	58227254	58227454	Enhancer	ARF4;SLMAP;PPIAP16;FLNB;FLNB;DNASE1L3;ABHD6;RP11;RPP14;PXK;PDHB;KCTD6	Keratinocyte;Keratinocyte;Keratinocyte;Keratinocyte;Keratinocyte;Keratinocyte;Keratinocyte;Keratinocyte;Keratinocyte;Keratinocyte;Keratinocyte;Keratinocyte
chr3	58369212	58369412	Enhancer	SLMAP;FLNB;FLNB;DNASE1L3;ABHD6;RP11;RPP14;PXK;PDHB;KCTD6	Keratinocyte;Keratinocyte;Keratinocyte;Keratinocyte;Keratinocyte;Keratinocyte;Keratinocyte;Keratinocyte;Keratinocyte;Keratinocyte
chr3	58369649	58369849	Enhancer	SLMAP;FLNB;FLNB;DNASE1L3;ABHD6;RP11;RPP14;PXK;PDHB;KCTD6	Keratinocyte;Keratinocyte;Keratinocyte;Keratinocyte;Keratinocyte;Keratinocyte;Keratinocyte;Keratinocyte;Keratinocyte;Keratinocyte
chr3	58514383	58514583	Enhancer	KCTD6;ACOX2;RP11;RP11;FAM107A;FLNB;ABHD6;RPP14	HUVEC,Keratinocyte;HUVEC;HUVEC,Keratinocyte;HUVEC,Keratinocyte;HUVEC;Keratinocyte;Keratinocyte;Keratinocyte
chr3	61950890	61951090	Enhancer	PTPRG	Keratinocyte
chr3	61951788	61951988	Enhancer	PTPRG	Keratinocyte
chr3	62246923	62247123	Enhancer	C3orf14	Keratinocyte
chr3	63436598	63436798	Enhancer	THOC7;ATXN7	Keratinocyte;Keratinocyte
chr3	63898997	63899197	Enhancer	C3orf49;AC136289.1;THOC7;ATXN7;RP11;RP11;PSMD6;RP11;RP11;PRICKLE2	Keratinocyte;Keratinocyte;Keratinocyte;Keratinocyte;Keratinocyte;Keratinocyte;Keratinocyte;Keratinocyte;Keratinocyte;Keratinocyte
chr3	63963813	63964013	Enhancer	C3orf49;AC136289.1;THOC7;ATXN7;RP11;RP11;PSMD6;PRICKLE2	Keratinocyte;Keratinocyte;Keratinocyte;Keratinocyte;Keratinocyte;Keratinocyte;Keratinocyte;Keratinocyte
chr3	64142857	64143057	Enhancer	THOC7;RP11;RP11;PSMD6;RP11;RP11;PRICKLE2;RP11;PRICKLE2;PRICKLE2	Keratinocyte;Keratinocyte;Keratinocyte;Keratinocyte;Keratinocyte;Keratinocyte;Keratinocyte;Keratinocyte;Keratinocyte;Keratinocyte
chr3	65779702	65779902	Enhancer	RP11;MAGI1;MAGI1;SLC25A26	Keratinocyte;Keratinocyte;Keratinocyte;Keratinocyte
chr3	65837954	65838154	Enhancer	MAGI1;MAGI1;SLC25A26	Keratinocyte;Keratinocyte;Keratinocyte
chr3	65982505	65982705	Enhancer	RP11;MAGI1;MAGI1;SLC25A26	Keratinocyte;Keratinocyte;Keratinocyte;Keratinocyte
chr3	65996809	65997009	Enhancer	RP11;MAGI1;MAGI1;SLC25A26	Keratinocyte;Keratinocyte;Keratinocyte;Keratinocyte
chr3	65996863	65997063	Enhancer	RP11;MAGI1;MAGI1;SLC25A26	Keratinocyte;Keratinocyte;Keratinocyte;Keratinocyte
chr3	66002827	66003027	Enhancer	RP11;MAGI1;MAGI1;SLC25A26	Keratinocyte;Keratinocyte;Keratinocyte;Keratinocyte
chr3	66002891	66003091	Enhancer	RP11;MAGI1;MAGI1;SLC25A26	Keratinocyte;Keratinocyte;Keratinocyte;Keratinocyte
chr3	66004105	66004305	Enhancer	RP11;MAGI1;MAGI1;SLC25A26	Keratinocyte;Keratinocyte;Keratinocyte;Keratinocyte
chr3	66007592	66007792	Enhancer	RP11;MAGI1;MAGI1	Keratinocyte;Keratinocyte;Keratinocyte
chr3	68716033	68716233	Enhancer	PSMC1P1;C3orf64;CTD;TMF1	Keratinocyte;Keratinocyte;Keratinocyte;Keratinocyte
chr3	69045678	69045878	Enhancer	C3orf64;CTD;TMF1;UBA3;ARL6IP5	Keratinocyte;Keratinocyte;Keratinocyte;Keratinocyte;Keratinocyte
chr3	69061475	69061675	Enhancer	C3orf64;CTD;TMF1;UBA3;ARL6IP5;LMOD3;FRMD4B	HUVEC,Keratinocyte;HUVEC,Keratinocyte;HUVEC,Keratinocyte;HUVEC;HUVEC,Keratinocyte;HUVEC,Keratinocyte;Keratinocyte
chr3	69253796	69253996	Enhancer	PSMC1P1;C3orf64;CTD;TMF1;UBA3;ARL6IP5;LMOD3;RP11;FRMD4B	Keratinocyte;Keratinocyte;Keratinocyte;Keratinocyte;Keratinocyte;Keratinocyte;Keratinocyte;Keratinocyte;Keratinocyte
chr3	69253835	69254035	Enhancer	PSMC1P1;C3orf64;CTD;TMF1;UBA3;ARL6IP5;LMOD3;RP11;FRMD4B	Keratinocyte;Keratinocyte;Keratinocyte;Keratinocyte;Keratinocyte;Keratinocyte;Keratinocyte;Keratinocyte;Keratinocyte
chr3	69281295	69281495	Enhancer	PSMC1P1;C3orf64;CTD;TMF1;UBA3;ARL6IP5;LMOD3;RP11;FRMD4B	Keratinocyte;Keratinocyte;Keratinocyte;Keratinocyte;Keratinocyte;Keratinocyte;Keratinocyte;Keratinocyte;Keratinocyte
chr3	69343298	69343498	Enhancer	PSMC1P1;C3orf64;CTD;TMF1;UBA3;ARL6IP5;RP11;FRMD4B	Keratinocyte;Keratinocyte;Keratinocyte;Keratinocyte;Keratinocyte;Keratinocyte;Keratinocyte;Keratinocyte
chr3	69590146	69590346	Enhancer	ARL6IP5;RP11;FRMD4B	Keratinocyte;Keratinocyte;Keratinocyte
chr3	72541597	72541797	Enhancer	RP11;RP11	Keratinocyte;Keratinocyte
chr3	77461206	77461406	Enhancer	RP11	Keratinocyte
chr3	86986814	86987014	Enhancer	VGLL3;PPATP1;CHMP2B	Keratinocyte;Keratinocyte;Keratinocyte
chr3	87282610	87282810	Enhancer	CHMP2B	Keratinocyte
chr3	97542195	97542395	Enhancer	ARL6;AC110491.1;MINA	Keratinocyte;Keratinocyte;Keratinocyte
chr3	97633544	97633744	Enhancer	MINA	Keratinocyte
chr3	98164907	98165107	Enhancer	RP11;CLDND1;RP11;GPR15;CPOX;RP11;RP11;DCBLD2	Keratinocyte;Keratinocyte;Keratinocyte;Keratinocyte;Keratinocyte;Keratinocyte;Keratinocyte;Keratinocyte
chr3	98705069	98705269	Enhancer	CLDND1;RP11;CPOX;RP11;ST3GAL6;RP11;DCBLD2;CTD	Keratinocyte;Keratinocyte;Keratinocyte;Keratinocyte;Keratinocyte;Keratinocyte;Keratinocyte;Keratinocyte
chr3	99646655	99646855	Enhancer	COL8A1;C3orf26;FILIP1L;VTI1BP1;TBC1D23;NIT2	Keratinocyte;Keratinocyte;Keratinocyte;Keratinocyte;Keratinocyte;Keratinocyte
chr3	99750994	99751194	Enhancer	COL8A1;C3orf26;FILIP1L;RP11;VTI1BP1;TBC1D23;NIT2;TOMM70A;GMFBP1	Keratinocyte;Keratinocyte;Keratinocyte;Keratinocyte;Keratinocyte;Keratinocyte;Keratinocyte;Keratinocyte;Keratinocyte
chr3	99822666	99822866	Enhancer	COL8A1;C3orf26;FILIP1L;RP11;VTI1BP1;TBC1D23;NIT2;TOMM70A;TMEM45A;GMFBP1;TFG	Keratinocyte;Keratinocyte;Keratinocyte;Keratinocyte;Keratinocyte;Keratinocyte;Keratinocyte;Keratinocyte;Keratinocyte;Keratinocyte;Keratinocyte
chr3	100240376	100240576	Enhancer	VTI1BP1;TBC1D23;TMEM45A;GPR128;GMFBP1;TFG;RP11	Keratinocyte;Keratinocyte;Keratinocyte;Keratinocyte;Keratinocyte;Keratinocyte;Keratinocyte
chr3	100244757	100244957	Enhancer	FILIP1L;VTI1BP1;TBC1D23;NIT2;LNP1;TOMM70A;TMEM45A;GPR128;GMFBP1;TFG	Keratinocyte;Keratinocyte;Keratinocyte;Keratinocyte;Keratinocyte;Keratinocyte;Keratinocyte;Keratinocyte;Keratinocyte;Keratinocyte
chr3	100244962	100245162	Enhancer	FILIP1L;VTI1BP1;TBC1D23;NIT2;LNP1;TOMM70A;TMEM45A;GPR128;GMFBP1;TFG	Keratinocyte;Keratinocyte;Keratinocyte;Keratinocyte;Keratinocyte;Keratinocyte;Keratinocyte;Keratinocyte;Keratinocyte;Keratinocyte
chr3	100270200	100270400	Enhancer	VTI1BP1;TBC1D23;NIT2;LNP1;TOMM70A;TMEM45A;GPR128;GMFBP1;TFG	Keratinocyte;Keratinocyte;Keratinocyte;Keratinocyte;Keratinocyte;Keratinocyte;Keratinocyte;Keratinocyte;Keratinocyte
chr3	100923078	100923278	Enhancer	ACTR3P3;RP11;RP11	Keratinocyte;Keratinocyte;Keratinocyte
chr3	101230903	101231103	Enhancer	SENP7;FAM172BP;RP11;RP11;RP11;ZBTB11;RPL24;RP11;CEP97;FAM55C;RP11;NFKBIZ	Keratinocyte;Keratinocyte;Keratinocyte;Keratinocyte;Keratinocyte;Keratinocyte;Keratinocyte;Keratinocyte;Keratinocyte;Keratinocyte;Keratinocyte;Keratinocyte
chr3	101575820	101576020	Enhancer	SENP7;FAM172BP;RG9MTD1;PCNP;RP11;RP11;ZBTB11;RPL24;RP11;CEP97;FAM55C;RP11;NFKBIZ	HUVEC;HUVEC;HUVEC;HUVEC;HUVEC;HUVEC;HUVEC;HUVEC;HUVEC;HUVEC;HUVEC;HUVEC;HUVEC
chr3	101587722	101587922	Enhancer	RP11;RG9MTD1;PCNP;RP11;RP11;RP11;ZBTB11;RPL24;RP11;CEP97;FAM55C;RP11;NFKBIZ	Keratinocyte;Keratinocyte;Keratinocyte;Keratinocyte;Keratinocyte;Keratinocyte;Keratinocyte;Keratinocyte;Keratinocyte;Keratinocyte;Keratinocyte;Keratinocyte;Keratinocyte
chr3	101711961	101712161	Enhancer	RG9MTD1;PCNP;RP11;RP11;ZBTB11;RPL24;RP11;FAM55C;RP11;NFKBIZ;RP11;ZPLD1	Keratinocyte;Keratinocyte;Keratinocyte;Keratinocyte;Keratinocyte;Keratinocyte;Keratinocyte;Keratinocyte;Keratinocyte;Keratinocyte;Keratinocyte;Keratinocyte
chr3	101718387	101718587	Enhancer	RG9MTD1;PCNP;RP11;RP11;ZBTB11;RPL24;RP11;FAM55C;RP11;NFKBIZ;RP11	Keratinocyte;Keratinocyte;Keratinocyte;Keratinocyte;Keratinocyte;Keratinocyte;Keratinocyte;Keratinocyte;Keratinocyte;Keratinocyte;Keratinocyte
chr3	101909299	101909499	Enhancer	RG9MTD1;PCNP;RP11;RP11;RPL24;RP11;RP11;NFKBIZ;RP11;ZPLD1	Keratinocyte;Keratinocyte;Keratinocyte;Keratinocyte;Keratinocyte;Keratinocyte;Keratinocyte;Keratinocyte;Keratinocyte;Keratinocyte
chr3	107151588	107151788	Enhancer	RP11	Keratinocyte
chr3	107408261	107408461	Enhancer	CD47	Keratinocyte
chr3	107725482	107725682	Enhancer	IFT57	Keratinocyte
chr3	108204298	108204498	Enhancer	MYH15	Keratinocyte
chr3	111304109	111304309	Enhancer	CD96;RP11;ZBED2;PLCXD2;PLCXD2;PHLDB2;ABHD10;TAGLN3;TMPRSS7;C3orf52	Keratinocyte;Keratinocyte;Keratinocyte;Keratinocyte;Keratinocyte;Keratinocyte;Keratinocyte;Keratinocyte;Keratinocyte;Keratinocyte
chr3	111458098	111458298	Enhancer	CD96;RP11;ZBED2;PLCXD2;PLCXD2;PHLDB2;ABHD10;TAGLN3;TMPRSS7;C3orf52;GCET2;RP11;RP11	Keratinocyte;Keratinocyte;Keratinocyte;Keratinocyte;Keratinocyte;Keratinocyte;Keratinocyte;Keratinocyte;Keratinocyte;Keratinocyte;Keratinocyte;Keratinocyte;Keratinocyte
chr3	111816506	111816706	Enhancer	RP11;ZBED2;PLCXD2;PLCXD2;PHLDB2;ABHD10;TAGLN3;TMPRSS7;C3orf52;GCET2;RP11	Keratinocyte;Keratinocyte;Keratinocyte;Keratinocyte;Keratinocyte;Keratinocyte;Keratinocyte;Keratinocyte;Keratinocyte;Keratinocyte;Keratinocyte
chr3	112736747	112736947	Enhancer	RP11;CD200R1;GTPBP8;C3orf17;RP11	Keratinocyte;Keratinocyte;Keratinocyte;Keratinocyte;Keratinocyte
chr3	112980354	112980554	Enhancer	RP11;BOC	Keratinocyte;Keratinocyte
chr3	113566910	113567110	Enhancer	RP11;NAA50;ATP6V1A;RP11;GRAMD1C;RP11;RP11	Keratinocyte;Keratinocyte;Keratinocyte;Keratinocyte;Keratinocyte;Keratinocyte;Keratinocyte
chr3	113586334	113586534	Enhancer	RP11;NAA50;ATP6V1A;GRAMD1C;RP11;RP11	Keratinocyte;Keratinocyte;Keratinocyte;Keratinocyte;Keratinocyte;Keratinocyte
chr3	119354618	119354818	Enhancer	UPK1B;POPDC2;COX17;PHBP8	Keratinocyte;Keratinocyte;Keratinocyte;Keratinocyte
chr3	121637963	121638163	Enhancer	SLC15A2;CSTA	Keratinocyte;Keratinocyte
chr3	122496500	122496700	Enhancer	CSTA;CCDC58;FAM162A;KPNA1;DTX3L;EIF4BP8;PARP14;HSPBAP1;DIRC2	Keratinocyte;Keratinocyte;Keratinocyte;Keratinocyte;Keratinocyte;Keratinocyte;Keratinocyte;Keratinocyte;Keratinocyte
chr3	122613161	122613361	Enhancer	HNRNPA1P23;CSTA;KPNA1;DTX3L;PARP9;EIF4BP8;PARP14;HSPBAP1;DIRC2;SEC22A	Keratinocyte;Keratinocyte;Keratinocyte;Keratinocyte;Keratinocyte;Keratinocyte;Keratinocyte;Keratinocyte;Keratinocyte;Keratinocyte
chr3	122650646	122650846	Enhancer	CSTA;PARP14;SEC22A	Keratinocyte;Keratinocyte;Keratinocyte
chr3	123459323	123459523	Enhancer	RP11	Keratinocyte
chr3	123519016	123519216	Enhancer	RP11	Keratinocyte
chr3	124556221	124556421	Enhancer	UMPS;ITGB5;HEG1	Keratinocyte;Keratinocyte;Keratinocyte
chr3	124601678	124601878	Enhancer	UMPS;ITGB5;HEG1	Keratinocyte;Keratinocyte;Keratinocyte
chr3	124828023	124828223	Enhancer	ITGB5;RP11;UMPS;HEG1	HUVEC;HUVEC,Keratinocyte;Keratinocyte;Keratinocyte
chr3	125041232	125041432	Enhancer	UMPS;HEG1;SLC12A8;RP11;ZNF148;GS1	Keratinocyte;Keratinocyte;Keratinocyte;Keratinocyte;Keratinocyte;Keratinocyte
chr3	126679099	126679299	Enhancer	TXNRD3;RCC2P4	Keratinocyte;Keratinocyte
chr3	126680142	126680342	Enhancer	TXNRD3;RCC2P4	Keratinocyte;Keratinocyte
chr3	127022819	127023019	Enhancer	PLXNA1	Keratinocyte
chr3	127022821	127023021	Enhancer	PLXNA1	Keratinocyte
chr3	127392690	127392890	Enhancer	MCM2;PODXL2;ABTB1	Keratinocyte;Keratinocyte;Keratinocyte
chr3	127779931	127780131	Enhancer	ABTB1;SEC61A1;EEFSEC;RUVBL1	Keratinocyte;Keratinocyte;Keratinocyte;Keratinocyte
chr3	128054673	128054873	Enhancer	SEC61A1	Keratinocyte
chr3	128056383	128056583	Enhancer	SEC61A1	Keratinocyte
chr3	128454630	128454830	Enhancer	C3orf27;POU5F1P6;RPN1;RAB7A;MARK2P8;FTH1P4;AC117508.1;RPS15AP16;ISY1;CNBP	Keratinocyte;Keratinocyte;Keratinocyte;Keratinocyte;Keratinocyte;Keratinocyte;Keratinocyte;Keratinocyte;Keratinocyte;Keratinocyte
chr3	128585640	128585840	Enhancer	POU5F1P6;RPN1;RAB7A;MARK2P8;FTH1P4;RPS15AP16;RP11;RP11;ACAD9;RP11;CCDC48;KIAA1257;RAB43;ISY1;CNBP;COPG1;C3orf37	HUVEC;HUVEC;HUVEC;HUVEC;HUVEC;HUVEC;HUVEC;HUVEC;HUVEC;HUVEC;HUVEC;HUVEC;HUVEC;HUVEC;HUVEC;HUVEC;HUVEC
chr3	128712075	128712275	Enhancer	RPN1;RAB7A;FTH1P4;ACAD9;RP11;KIAA1257;CNBP;COPG1;C3orf37	Keratinocyte;Keratinocyte;Keratinocyte;Keratinocyte;Keratinocyte;Keratinocyte;Keratinocyte;Keratinocyte;Keratinocyte
chr3	128930586	128930786	Enhancer	RPN1;RAB7A;KIAA1257;RAB43;ISY1;ISY1;CNBP;H1FX;H1FX	Keratinocyte;Keratinocyte;Keratinocyte;Keratinocyte;Keratinocyte;Keratinocyte;Keratinocyte;Keratinocyte;Keratinocyte
chr3	129381772	129381972	Enhancer	RPL32P3;AC023162.1;PLXND1;AC083799.1;TMCC1	Keratinocyte;Keratinocyte;Keratinocyte;Keratinocyte;Keratinocyte
chr3	129413150	129413350	Enhancer	C3orf37;H1FX;RP11;RPL32P3;MBD4;AC023162.1;PLXND1;AC083799.1	Keratinocyte;Keratinocyte;Keratinocyte;Keratinocyte;Keratinocyte;Keratinocyte;Keratinocyte;Keratinocyte
chr3	130545690	130545890	Enhancer	GSTO3P;ATP2C1;RP11;RP11;ASTE1	Keratinocyte;Keratinocyte;Keratinocyte;Keratinocyte;Keratinocyte
chr3	131121132	131121332	Enhancer	NUDT16P;NUDT16;MRPL3	Keratinocyte;Keratinocyte;Keratinocyte
chr3	132296321	132296521	Enhancer	RP11;DNAJC13;CCRL1;UBA5;ACAD11;NPHP3	Keratinocyte;Keratinocyte;Keratinocyte;Keratinocyte;Keratinocyte;Keratinocyte
chr3	133195405	133195605	Enhancer	TOPBP1;SRPRB	Keratinocyte;Keratinocyte
chr3	133363868	133364068	Enhancer	CDV3;TOPBP1;TFP1	Keratinocyte;Keratinocyte;Keratinocyte
chr3	133668134	133668334	Enhancer	SRPRB;RAB6B;C3orf36;SLCO2A1	HUVEC;HUVEC;HUVEC;HUVEC
chr3	134039794	134039994	Enhancer	RP11;RPL39P5;AMOTL2;HMGB3P13;CEP63;ANAPC13;KY	Keratinocyte;Keratinocyte;Keratinocyte;Keratinocyte;Keratinocyte;Keratinocyte;Keratinocyte
chr3	134056114	134056314	Enhancer	HMGB3P14;RP11;RPL39P5;AMOTL2;HMGB3P13;CEP63;ANAPC13	Keratinocyte;Keratinocyte;Keratinocyte;Keratinocyte;Keratinocyte;Keratinocyte;Keratinocyte
chr3	134060350	134060550	Enhancer	RP11;RPL39P5;AMOTL2;HMGB3P13;CEP63;ANAPC13	Keratinocyte;Keratinocyte;Keratinocyte;Keratinocyte;Keratinocyte;Keratinocyte
chr3	134069794	134069994	Enhancer	HMGB3P14;RP11;RPL39P5;AMOTL2;HMGB3P13;CEP63;ANAPC13	Keratinocyte;Keratinocyte;Keratinocyte;Keratinocyte;Keratinocyte;Keratinocyte;Keratinocyte
chr3	135627240	135627440	Enhancer	RP11;RP11	Keratinocyte;Keratinocyte
chr3	135686543	135686743	Enhancer	PPP2R3A;RP11;TDGF1P6;MSL2;RP11;PCCB	Keratinocyte;Keratinocyte;Keratinocyte;Keratinocyte;Keratinocyte;Keratinocyte
chr3	136679693	136679893	Enhancer	SLC35G2;RP11;NCK1;RP11;IL20RB;IL20RB	Keratinocyte;Keratinocyte;Keratinocyte;Keratinocyte;Keratinocyte;Keratinocyte
chr3	136698678	136698878	Enhancer	RP11;STAG1;RP11;SLC35G2;RP11;NCK1;RP11;IL20RB;IL20RB	Keratinocyte;Keratinocyte;Keratinocyte;Keratinocyte;Keratinocyte;Keratinocyte;Keratinocyte;Keratinocyte;Keratinocyte
chr3	136701482	136701682	Enhancer	RP11;STAG1;RP11;SLC35G2;RP11;NCK1;RP11;IL20RB;IL20RB	Keratinocyte;Keratinocyte;Keratinocyte;Keratinocyte;Keratinocyte;Keratinocyte;Keratinocyte;Keratinocyte;Keratinocyte
chr3	136703910	136704110	Enhancer	RP11;STAG1;RP11;SLC35G2;RP11;NCK1;RP11;IL20RB;IL20RB	Keratinocyte;Keratinocyte;Keratinocyte;Keratinocyte;Keratinocyte;Keratinocyte;Keratinocyte;Keratinocyte;Keratinocyte
chr3	136708932	136709132	Enhancer	RP11;STAG1;RP11;SLC35G2;RP11;NCK1;RP11;IL20RB;IL20RB	Keratinocyte;Keratinocyte;Keratinocyte;Keratinocyte;Keratinocyte;Keratinocyte;Keratinocyte;Keratinocyte;Keratinocyte
chr3	138154520	138154720	Enhancer	KRT8P36;DBR1;ARMC8;MRAS;ESYT3;EEF1A1P25	Keratinocyte;Keratinocyte;Keratinocyte;Keratinocyte;Keratinocyte;Keratinocyte
chr3	138154654	138154854	Enhancer	KRT8P36;DBR1;ARMC8;MRAS;ESYT3;EEF1A1P25	Keratinocyte;Keratinocyte;Keratinocyte;Keratinocyte;Keratinocyte;Keratinocyte
chr3	138344890	138345090	Enhancer	CEP70;FAIM	Keratinocyte;Keratinocyte
chr3	138505968	138506168	Enhancer	GAPDHP39;EEF1A1P25	Keratinocyte;Keratinocyte
chr3	139278550	139278750	Enhancer	COPB2;RP11;RBP2;ACTG1P1;RBP1;RP11	Keratinocyte;Keratinocyte;Keratinocyte;Keratinocyte;Keratinocyte;Keratinocyte
chr3	140812910	140813110	Enhancer	RASA2	Keratinocyte
chr3	140958338	140958538	Enhancer	SLC25A36;ACPL2;RASA2;RASA2;YWHAQP6	Keratinocyte;Keratinocyte;Keratinocyte;Keratinocyte;Keratinocyte
chr3	140958447	140958647	Enhancer	SLC25A36;ACPL2;RASA2;RASA2;YWHAQP6	Keratinocyte;Keratinocyte;Keratinocyte;Keratinocyte;Keratinocyte
chr3	141102499	141102699	Enhancer	SLC25A36;ACPL2;ZBTB38;RP11;RASA2;RASA2;YWHAQP6;RP11;RNF7;ATP1B3;RP11	Keratinocyte;Keratinocyte;Keratinocyte;Keratinocyte;Keratinocyte;Keratinocyte;Keratinocyte;Keratinocyte;Keratinocyte;Keratinocyte;Keratinocyte
chr3	141102553	141102753	Enhancer	SLC25A36;ACPL2;ZBTB38;RP11;RASA2;RASA2;YWHAQP6;RP11;RNF7;ATP1B3;RP11	Keratinocyte;Keratinocyte;Keratinocyte;Keratinocyte;Keratinocyte;Keratinocyte;Keratinocyte;Keratinocyte;Keratinocyte;Keratinocyte;Keratinocyte
chr3	141105173	141105373	Enhancer	ACPL2;ZBTB38;RP11;RASA2;RASA2;YWHAQP6;RP11;RNF7;RP11	Keratinocyte;Keratinocyte;Keratinocyte;Keratinocyte;Keratinocyte;Keratinocyte;Keratinocyte;Keratinocyte;Keratinocyte
chr3	141105776	141105976	Enhancer	ACPL2;ZBTB38;RP11;RASA2;RASA2;YWHAQP6;RP11;RNF7;RP11	Keratinocyte;Keratinocyte;Keratinocyte;Keratinocyte;Keratinocyte;Keratinocyte;Keratinocyte;Keratinocyte;Keratinocyte
chr3	141105820	141106020	Enhancer	ACPL2;ZBTB38;RP11;RASA2;RASA2;YWHAQP6;RP11;RNF7;RP11	Keratinocyte;Keratinocyte;Keratinocyte;Keratinocyte;Keratinocyte;Keratinocyte;Keratinocyte;Keratinocyte;Keratinocyte
chr3	141106089	141106289	Enhancer	ACPL2;ZBTB38;RP11;RASA2;RASA2;YWHAQP6;RP11;RNF7;RP11	Keratinocyte;Keratinocyte;Keratinocyte;Keratinocyte;Keratinocyte;Keratinocyte;Keratinocyte;Keratinocyte;Keratinocyte
chr3	141548038	141548238	Enhancer	RNF7;ATP1B3;RP11;TFDP2	Keratinocyte;Keratinocyte;Keratinocyte;Keratinocyte
chr3	141549409	141549609	Enhancer	RNF7;ATP1B3;RP11;TFDP2	Keratinocyte;Keratinocyte;Keratinocyte;Keratinocyte
chr3	141678456	141678656	Enhancer	ZBTB38;YWHAQP6;RP11;RNF7;HMGN2P25;ATP1B3;ATP1B3;RP11;TFDP2	Keratinocyte;Keratinocyte;Keratinocyte;Keratinocyte;Keratinocyte;Keratinocyte;Keratinocyte;Keratinocyte;Keratinocyte
chr3	141866449	141866649	Enhancer	RP11;RNF7;HMGN2P25;ATP1B3;ATP1B3;RP11;TFDP2	Keratinocyte;Keratinocyte;Keratinocyte;Keratinocyte;Keratinocyte;Keratinocyte;Keratinocyte
chr3	142585647	142585847	Enhancer	RP11;ATR;PLS1;TRPC1;RP11;PCOLCE2	Keratinocyte;Keratinocyte;Keratinocyte;Keratinocyte;Keratinocyte;Keratinocyte
chr3	149335911	149336111	Enhancer	TM4SF1;RP11;WWTR1;WWTR1;COMMD2;RNF13;RP11;RP11;RP11	Keratinocyte;Keratinocyte;Keratinocyte;Keratinocyte;Keratinocyte;Keratinocyte;Keratinocyte;Keratinocyte;Keratinocyte
chr3	149363845	149364045	Enhancer	UBQLN4P1;TM4SF1;RP11;WWTR1;WWTR1;COMMD2;RNF13;RP11;RP11;RP11;PFN2	Keratinocyte;Keratinocyte;Keratinocyte;Keratinocyte;Keratinocyte;Keratinocyte;Keratinocyte;Keratinocyte;Keratinocyte;Keratinocyte;Keratinocyte
chr3	149363905	149364105	Enhancer	UBQLN4P1;TM4SF1;RP11;WWTR1;WWTR1;COMMD2;RNF13;RP11;RP11;RP11;PFN2	Keratinocyte;Keratinocyte;Keratinocyte;Keratinocyte;Keratinocyte;Keratinocyte;Keratinocyte;Keratinocyte;Keratinocyte;Keratinocyte;Keratinocyte
chr3	150139975	150140175	Enhancer	RP11;RP11;PFN2;RP11;TSC22D2;EIF2A;RP11;SERP1;RP11;SIAH2;SIAH2	Keratinocyte;Keratinocyte;Keratinocyte;Keratinocyte;Keratinocyte;Keratinocyte;Keratinocyte;Keratinocyte;Keratinocyte;Keratinocyte;Keratinocyte
chr3	150140168	150140368	Enhancer	RP11;RP11;PFN2;RP11;TSC22D2;EIF2A;RP11;SERP1;RP11;SIAH2;SIAH2	Keratinocyte;Keratinocyte;Keratinocyte;Keratinocyte;Keratinocyte;Keratinocyte;Keratinocyte;Keratinocyte;Keratinocyte;Keratinocyte;Keratinocyte
chr3	150140187	150140387	Enhancer	RP11;RP11;PFN2;RP11;TSC22D2;EIF2A;RP11;SERP1;RP11;SIAH2;SIAH2	Keratinocyte;Keratinocyte;Keratinocyte;Keratinocyte;Keratinocyte;Keratinocyte;Keratinocyte;Keratinocyte;Keratinocyte;Keratinocyte;Keratinocyte
chr3	150167461	150167661	Enhancer	RNF13;RP11;RP11;PFN2;RP11;TSC22D2;EIF2A;RP11;SERP1;RP11;SIAH2;SIAH2	Keratinocyte;Keratinocyte;Keratinocyte;Keratinocyte;Keratinocyte;Keratinocyte;Keratinocyte;Keratinocyte;Keratinocyte;Keratinocyte;Keratinocyte;Keratinocyte
chr3	150237038	150237238	Enhancer	RP11;RP11;PFN2;RP11;RP11;TSC22D2;EIF2A;RP11;SERP1;SIAH2;SIAH2	Keratinocyte;Keratinocyte;Keratinocyte;Keratinocyte;Keratinocyte;Keratinocyte;Keratinocyte;Keratinocyte;Keratinocyte;Keratinocyte;Keratinocyte
chr3	150445716	150445916	Enhancer	TSC22D2;EIF2A;RP11;SERP1;RP11;FAM194A;RP11;SIAH2;SIAH2;GPR87	Keratinocyte;Keratinocyte;Keratinocyte;Keratinocyte;Keratinocyte;Keratinocyte;Keratinocyte;Keratinocyte;Keratinocyte;Keratinocyte
chr3	151033909	151034109	Enhancer	GPR87	Keratinocyte
chr3	151534111	151534311	Enhancer	AADAC;MBNL1	Keratinocyte;Keratinocyte
chr3	151643411	151643611	Enhancer	MBNL1	Keratinocyte
chr3	153011065	153011265	Enhancer	HMGN2P13;RP11;RP11;RAP2B	Keratinocyte;Keratinocyte;Keratinocyte;Keratinocyte
chr3	153011252	153011452	Enhancer	HMGN2P13;RP11;RP11;RAP2B	Keratinocyte;Keratinocyte;Keratinocyte;Keratinocyte
chr3	155742771	155742971	Enhancer	SETP14;RP11	Keratinocyte;Keratinocyte
chr3	156344130	156344330	Enhancer	TIPARP;TIPARP;METTL15P1;PA2G4P4;RP11;RP11;CCNL1	Keratinocyte;Keratinocyte;Keratinocyte;Keratinocyte;Keratinocyte;Keratinocyte;Keratinocyte
chr3	156347767	156347967	Enhancer	TIPARP;METTL15P1;PA2G4P4;RP11;RP11;CCNL1	Keratinocyte;Keratinocyte;Keratinocyte;Keratinocyte;Keratinocyte;Keratinocyte
chr3	156469323	156469523	Enhancer	RP11;SSR3;TIPARP;TIPARP;METTL15P1;PA2G4P4;RP11;RP11;LEKR1;CCNL1;KRT18P34	Keratinocyte;Keratinocyte;Keratinocyte;Keratinocyte;Keratinocyte;Keratinocyte;Keratinocyte;Keratinocyte;Keratinocyte;Keratinocyte;Keratinocyte
chr3	156506697	156506897	Enhancer	RP11;SSR3;TIPARP;TIPARP;METTL15P1;PA2G4P4;RP11;CCNL1;KRT18P34	Keratinocyte;Keratinocyte;Keratinocyte;Keratinocyte;Keratinocyte;Keratinocyte;Keratinocyte;Keratinocyte;Keratinocyte
chr3	159443945	159444145	Enhancer	IQCJ;RP11	Keratinocyte;Keratinocyte
chr3	159443976	159444176	Enhancer	IQCJ;RP11	Keratinocyte;Keratinocyte
chr3	161009562	161009762	Enhancer	PSMC1P7;RP11	Keratinocyte;Keratinocyte
chr3	161034018	161034218	Enhancer	RP11;PSMC1P7;RP11	Keratinocyte;Keratinocyte;Keratinocyte
chr3	165524154	165524354	Enhancer	BCHE	Keratinocyte
chr3	167446593	167446793	Enhancer	PDCD10;SERPINI1	Keratinocyte;Keratinocyte
chr3	168803773	168803973	Enhancer	RP11	Keratinocyte
chr3	168891316	168891516	Enhancer	RP11	Keratinocyte
chr3	170061885	170062085	Enhancer	RP11;SEC62;RP11;SEC62;PHC3;PRKCI	Keratinocyte;Keratinocyte;Keratinocyte;Keratinocyte;Keratinocyte;Keratinocyte
chr3	170430335	170430535	Enhancer	KRT8P13;KLF7P1	Keratinocyte;Keratinocyte
chr3	171520394	171520594	Enhancer	AC078953.1;PLD1;TMEM212;AC092964.2;BZW1P1	Keratinocyte;Keratinocyte;Keratinocyte;Keratinocyte;Keratinocyte
chr3	171822325	171822525	Enhancer	FNDC3B;RP11;AC092964.2;AC092964.1;BZW1P1;TNFSF10;SLC31A1P1	Keratinocyte;Keratinocyte;Keratinocyte;Keratinocyte;Keratinocyte;Keratinocyte;Keratinocyte
chr3	171864316	171864516	Enhancer	AC078953.1;PLD1;FNDC3B;RP11;AC092964.2;AC092964.1;BZW1P1;TNFSF10;SLC31A1P1;NCEH1	Keratinocyte;Keratinocyte;Keratinocyte;Keratinocyte;Keratinocyte;Keratinocyte;Keratinocyte;Keratinocyte;Keratinocyte;Keratinocyte
chr3	171874169	171874369	Enhancer	AC078953.1;PLD1;FNDC3B;AC092964.1;BZW1P1;TNFSF10;SLC31A1P1	Keratinocyte;Keratinocyte;Keratinocyte;Keratinocyte;Keratinocyte;Keratinocyte;Keratinocyte
chr3	171874227	171874427	Enhancer	AC078953.1;PLD1;FNDC3B;AC092964.1;BZW1P1;TNFSF10;SLC31A1P1	Keratinocyte;Keratinocyte;Keratinocyte;Keratinocyte;Keratinocyte;Keratinocyte;Keratinocyte
chr3	172278346	172278546	Enhancer	AC092964.1;BZW1P1;RP11;SLC31A1P1;NCEH1;ECT2	Keratinocyte;Keratinocyte;Keratinocyte;Keratinocyte;Keratinocyte;Keratinocyte
chr3	172302323	172302523	Enhancer	AC092964.1;BZW1P1;RP11;SLC31A1P1;NCEH1;ECT2	Keratinocyte;Keratinocyte;Keratinocyte;Keratinocyte;Keratinocyte;Keratinocyte
chr3	176828775	176828975	Enhancer	TBL1XR1;ASS1P7	Keratinocyte;Keratinocyte
chr3	176843816	176844016	Enhancer	TBL1XR1;ASS1P7	Keratinocyte;Keratinocyte
chr3	176843915	176844115	Enhancer	TBL1XR1;ASS1P7	Keratinocyte;Keratinocyte
chr3	176868050	176868250	Enhancer	TBL1XR1;ASS1P7	Keratinocyte;Keratinocyte
chr3	177165740	177165940	Enhancer	TBL1XR1	Keratinocyte
chr3	177320897	177321097	Enhancer	ASS1P7	Keratinocyte
chr3	178755097	178755297	Enhancer	ZMAT3;GNB4	Keratinocyte;Keratinocyte
chr3	180631832	180632032	Enhancer	FXR1;RP11;DNAJC19;SOX2	HUVEC,Keratinocyte;HUVEC,Keratinocyte;HUVEC,Keratinocyte;HUVEC,Keratinocyte
chr3	181930314	181930514	Enhancer	RP11;RP11	Keratinocyte;Keratinocyte
chr3	182082771	182082971	Enhancer	RP11	Keratinocyte
chr3	182082809	182083009	Enhancer	RP11	Keratinocyte
chr3	183009660	183009860	Enhancer	DCUN1D1;MCCC1;LAMP3;B3GNT5;RP11;KLHL6;YEATS2	Keratinocyte;Keratinocyte;Keratinocyte;Keratinocyte;Keratinocyte;Keratinocyte;Keratinocyte
chr3	183642834	183643034	Enhancer	YEATS2;YEATS2;MAP6D1;PARL;ABCC5;EEF1A1P8;HSP90AA5P;EIF2B5;RP11;DVL3;AP2M1;ABCF3;ALG3;ECE2	Keratinocyte;Keratinocyte;Keratinocyte;Keratinocyte;Keratinocyte;Keratinocyte;Keratinocyte;Keratinocyte;Keratinocyte;Keratinocyte;Keratinocyte;Keratinocyte;Keratinocyte;Keratinocyte
chr3	183676996	183677196	Enhancer	KLHL24;YEATS2;YEATS2;MAP6D1;RP11;PARL;ABCC5;EEF1A1P8;HSP90AA5P;EIF2B5;RP11;DVL3;AP2M1;ABCF3	Keratinocyte;Keratinocyte;Keratinocyte;Keratinocyte;Keratinocyte;Keratinocyte;Keratinocyte;Keratinocyte;Keratinocyte;Keratinocyte;Keratinocyte;Keratinocyte;Keratinocyte;Keratinocyte
chr3	183894297	183894497	Enhancer	MAP6D1;ABCC5;ABCC5;EEF1A1P8;HSP90AA5P;EIF2B5;RP11;DVL3;AP2M1;ABCF3;VWA5B2;ALG3;ECE2;CAMK2N2;PSMD2;EIF4G1;FAM131A;CLCN2;POLR2H;THPO	HUVEC;HUVEC;HUVEC;HUVEC;HUVEC;HUVEC;HUVEC;HUVEC;HUVEC;HUVEC;HUVEC;HUVEC;HUVEC;HUVEC;HUVEC;HUVEC;HUVEC;HUVEC;HUVEC;HUVEC
chr3	184056743	184056943	Enhancer	RP11;PARL;ABCC5;EEF1A1P8;HSP90AA5P;EIF2B5;RP11;DVL3;ALG3;ECE2;PSMD2;EIF4G1;FAM131A;CLCN2;POLR2H;CHRD;EIF2B5;EPHB3;MAGEF1;RP11	Keratinocyte;Keratinocyte;Keratinocyte;Keratinocyte;Keratinocyte;Keratinocyte;Keratinocyte;Keratinocyte;Keratinocyte;Keratinocyte;Keratinocyte;Keratinocyte;Keratinocyte;Keratinocyte;Keratinocyte;Keratinocyte;Keratinocyte;Keratinocyte;Keratinocyte;Keratinocyte
chr3	184056870	184057070	Enhancer	RP11;PARL;ABCC5;EEF1A1P8;HSP90AA5P;EIF2B5;RP11;DVL3;ALG3;ECE2;PSMD2;EIF4G1;FAM131A;CLCN2;POLR2H;CHRD;EIF2B5;EPHB3;MAGEF1;RP11	Keratinocyte;Keratinocyte;Keratinocyte;Keratinocyte;Keratinocyte;Keratinocyte;Keratinocyte;Keratinocyte;Keratinocyte;Keratinocyte;Keratinocyte;Keratinocyte;Keratinocyte;Keratinocyte;Keratinocyte;Keratinocyte;Keratinocyte;Keratinocyte;Keratinocyte;Keratinocyte
chr3	184059779	184059979	Enhancer	PARL;HSP90AA5P;EIF2B5;RP11;DVL3;AP2M1;ABCF3;ALG3;ECE2;CAMK2N2;PSMD2;EIF4G1;FAM131A;CLCN2;POLR2H;EPHB3;RP11	Keratinocyte;Keratinocyte;Keratinocyte;Keratinocyte;Keratinocyte;Keratinocyte;Keratinocyte;Keratinocyte;Keratinocyte;Keratinocyte;Keratinocyte;Keratinocyte;Keratinocyte;Keratinocyte;Keratinocyte;Keratinocyte;Keratinocyte
chr3	184161598	184161798	Enhancer	EEF1A1P8;HSP90AA5P;EIF2B5;RP11;DVL3;AP2M1;ABCF3;CAMK2N2;PSMD2;EIF4G1;FAM131A;CLCN2;POLR2H;CHRD;MAGEF1;RP11;VPS8	Keratinocyte;Keratinocyte;Keratinocyte;Keratinocyte;Keratinocyte;Keratinocyte;Keratinocyte;Keratinocyte;Keratinocyte;Keratinocyte;Keratinocyte;Keratinocyte;Keratinocyte;Keratinocyte;Keratinocyte;Keratinocyte;Keratinocyte
chr3	184455005	184455205	Enhancer	FAM131A;POLR2H;EIF2B5;EPHB3;VPS8	Keratinocyte;Keratinocyte;Keratinocyte;Keratinocyte;Keratinocyte
chr3	184458419	184458619	Enhancer	RP11;PSMD2;EIF4G1;FAM131A;POLR2H;EIF2B5;EPHB3;MAGEF1;VPS8	Keratinocyte;Keratinocyte;Keratinocyte;Keratinocyte;Keratinocyte;Keratinocyte;Keratinocyte;Keratinocyte;Keratinocyte
chr3	184459078	184459278	Enhancer	RP11;PSMD2;EIF4G1;FAM131A;POLR2H;EIF2B5;EPHB3;MAGEF1;VPS8	Keratinocyte;Keratinocyte;Keratinocyte;Keratinocyte;Keratinocyte;Keratinocyte;Keratinocyte;Keratinocyte;Keratinocyte
chr3	184478229	184478429	Enhancer	HSP90AA5P;EIF2B5;RP11;AP2M1;ABCF3;ALG3;PSMD2;EIF4G1;FAM131A;CLCN2;POLR2H;EIF2B5;EPHB3;MAGEF1;RP11;VPS8	Keratinocyte;Keratinocyte;Keratinocyte;Keratinocyte;Keratinocyte;Keratinocyte;Keratinocyte;Keratinocyte;Keratinocyte;Keratinocyte;Keratinocyte;Keratinocyte;Keratinocyte;Keratinocyte;Keratinocyte;Keratinocyte
chr3	185055114	185055314	Enhancer	C3orf70;RP11;EIF2S2P2;EHHADH;MAP3K13;RP11;TMEM41A;TRA2B	Keratinocyte;Keratinocyte;Keratinocyte;Keratinocyte;Keratinocyte;Keratinocyte;Keratinocyte;Keratinocyte
chr3	185083190	185083390	Enhancer	EIF2S2P2;EHHADH;MAP3K13;RP11;TRA2B	Keratinocyte;Keratinocyte;Keratinocyte;Keratinocyte;Keratinocyte
chr3	185215432	185215632	Enhancer	RP11;TMEM41A	HUVEC;HUVEC
chr3	185245244	185245444	Enhancer	EHHADH;MAP3K13;TRA2B	Keratinocyte;Keratinocyte;Keratinocyte
chr3	185245391	185245591	Enhancer	EHHADH;MAP3K13;TRA2B	Keratinocyte;Keratinocyte;Keratinocyte
chr3	185433311	185433511	Enhancer	EHHADH;MAP3K13;RP11;SENP2;C3orf65;TRA2B;RP11	Keratinocyte;Keratinocyte;Keratinocyte;Keratinocyte;Keratinocyte;Keratinocyte;Keratinocyte
chr3	186478399	186478599	Enhancer	CRYGS;DNAJB11;TBCCD1;EIF4A2;SNORA81;RFC4;RP11;RP11;RP11;ST6GAL1;AC007690.1	Keratinocyte;Keratinocyte;Keratinocyte;Keratinocyte;Keratinocyte;Keratinocyte;Keratinocyte;Keratinocyte;Keratinocyte;Keratinocyte;Keratinocyte
chr3	187481867	187482067	Enhancer	LPP	Keratinocyte
chr3	187482233	187482433	Enhancer	LPP	Keratinocyte
chr3	187492018	187492218	Enhancer	RP11;LPP	Keratinocyte;Keratinocyte
chr3	187548656	187548856	Enhancer	LPP	Keratinocyte
chr3	188351154	188351354	Enhancer	LPP;TPRG1;TPRG1;RP11	Keratinocyte;Keratinocyte;Keratinocyte;Keratinocyte
chr3	188535776	188535976	Enhancer	TPRG1;TPRG1;RP11	Keratinocyte;Keratinocyte;Keratinocyte
chr3	188572144	188572344	Enhancer	LPP;TPRG1;TPRG1	Keratinocyte;Keratinocyte;Keratinocyte
chr3	189011548	189011748	Enhancer	TPRG1;TP63;LEPREL1	Keratinocyte;Keratinocyte;Keratinocyte
chr3	189110727	189110927	Enhancer	RP11;MTAPP2;LEPREL1;CLDN16	Keratinocyte;Keratinocyte;Keratinocyte;Keratinocyte
chr3	189111548	189111748	Enhancer	RP11;MTAPP2;LEPREL1;CLDN16	Keratinocyte;Keratinocyte;Keratinocyte;Keratinocyte
chr3	189208275	189208475	Enhancer	MTAPP2;LEPREL1;LEPREL1;CLDN16	Keratinocyte;Keratinocyte;Keratinocyte;Keratinocyte
chr3	189231456	189231656	Enhancer	MTAPP2;LEPREL1;LEPREL1;CLDN16	Keratinocyte;Keratinocyte;Keratinocyte;Keratinocyte
chr3	189307065	189307265	Enhancer	TP63;MTAPP2;LEPREL1;LEPREL1;CLDN16	Keratinocyte;Keratinocyte;Keratinocyte;Keratinocyte;Keratinocyte
chr3	189428306	189428506	Enhancer	TP63;MTAPP2;LEPREL1;LEPREL1;RP11;CLDN1;CLDN16;GCNT1P3;7SK	Keratinocyte;Keratinocyte;Keratinocyte;Keratinocyte;Keratinocyte;Keratinocyte;Keratinocyte;Keratinocyte;Keratinocyte
chr3	189429339	189429539	Enhancer	TP63;MTAPP2;LEPREL1;LEPREL1;RP11;CLDN1;CLDN16;GCNT1P3;7SK	Keratinocyte;Keratinocyte;Keratinocyte;Keratinocyte;Keratinocyte;Keratinocyte;Keratinocyte;Keratinocyte;Keratinocyte
chr3	189484377	189484577	Enhancer	MTAPP2;LEPREL1;LEPREL1;RP11;CLDN1;CLDN16;GCNT1P3;7SK;CCT6P4	Keratinocyte;Keratinocyte;Keratinocyte;Keratinocyte;Keratinocyte;Keratinocyte;Keratinocyte;Keratinocyte;Keratinocyte
chr3	189497478	189497678	Enhancer	TP63;MTAPP2;LEPREL1;LEPREL1;RP11;CLDN1;CLDN16;GCNT1P3;7SK;CCT6P4	Keratinocyte;Keratinocyte;Keratinocyte;Keratinocyte;Keratinocyte;Keratinocyte;Keratinocyte;Keratinocyte;Keratinocyte;Keratinocyte
chr3	189499325	189499525	Enhancer	TP63;MTAPP2;LEPREL1;LEPREL1;RP11;CLDN1;CLDN16;GCNT1P3;7SK;CCT6P4	Keratinocyte;Keratinocyte;Keratinocyte;Keratinocyte;Keratinocyte;Keratinocyte;Keratinocyte;Keratinocyte;Keratinocyte;Keratinocyte
chr3	189508574	189508774	Enhancer	TP63;MTAPP2;LEPREL1;LEPREL1;RP11;CLDN1;CLDN16;GCNT1P3;7SK;CCT6P4	Keratinocyte;Keratinocyte;Keratinocyte;Keratinocyte;Keratinocyte;Keratinocyte;Keratinocyte;Keratinocyte;Keratinocyte;Keratinocyte
chr3	189517174	189517374	Enhancer	TP63;MTAPP2;LEPREL1;LEPREL1;RP11;CLDN1;CLDN16;GCNT1P3;7SK;CCT6P4	Keratinocyte;Keratinocyte;Keratinocyte;Keratinocyte;Keratinocyte;Keratinocyte;Keratinocyte;Keratinocyte;Keratinocyte;Keratinocyte
chr3	189524370	189524570	Enhancer	TP63;MTAPP2;LEPREL1;LEPREL1;RP11;CLDN1;CLDN16;GCNT1P3;7SK;CCT6P4	Keratinocyte;Keratinocyte;Keratinocyte;Keratinocyte;Keratinocyte;Keratinocyte;Keratinocyte;Keratinocyte;Keratinocyte;Keratinocyte
chr3	189552352	189552552	Enhancer	TP63;MTAPP2;LEPREL1;LEPREL1;RP11;CLDN1;CLDN16;GCNT1P3;7SK;CCT6P4	Keratinocyte;Keratinocyte;Keratinocyte;Keratinocyte;Keratinocyte;Keratinocyte;Keratinocyte;Keratinocyte;Keratinocyte;Keratinocyte
chr3	189627597	189627797	Enhancer	RP11;TP63;MTAPP2;LEPREL1;LEPREL1;CLDN1;CLDN16;IL1RAP	Keratinocyte;Keratinocyte;Keratinocyte;Keratinocyte;Keratinocyte;Keratinocyte;Keratinocyte;Keratinocyte
chr3	189659006	189659206	Enhancer	TP63;MTAPP2;LEPREL1;LEPREL1;CLDN1;CLDN16;IL1RAP	Keratinocyte;Keratinocyte;Keratinocyte;Keratinocyte;Keratinocyte;Keratinocyte;Keratinocyte
chr3	189662286	189662486	Enhancer	RP11;TP63;MTAPP2;LEPREL1;LEPREL1;CLDN1;CLDN16;IL1RAP	Keratinocyte;Keratinocyte;Keratinocyte;Keratinocyte;Keratinocyte;Keratinocyte;Keratinocyte;Keratinocyte
chr3	189755866	189756066	Enhancer	TP63;MTAPP2;LEPREL1;LEPREL1;CLDN1;CLDN16;IL1RAP	Keratinocyte;Keratinocyte;Keratinocyte;Keratinocyte;Keratinocyte;Keratinocyte;Keratinocyte
chr3	189762453	189762653	Enhancer	TP63;MTAPP2;LEPREL1;LEPREL1;CLDN1;CLDN16;IL1RAP	Keratinocyte;Keratinocyte;Keratinocyte;Keratinocyte;Keratinocyte;Keratinocyte;Keratinocyte
chr3	189782137	189782337	Enhancer	TP63;MTAPP2;LEPREL1;LEPREL1;RP11;CLDN1;IL1RAP	Keratinocyte;Keratinocyte;Keratinocyte;Keratinocyte;Keratinocyte;Keratinocyte;Keratinocyte
chr3	189834283	189834483	Enhancer	TP63;MTAPP2;LEPREL1;LEPREL1;RP11;CLDN1;CLDN16;IL1RAP	Keratinocyte;Keratinocyte;Keratinocyte;Keratinocyte;Keratinocyte;Keratinocyte;Keratinocyte;Keratinocyte
chr3	190037595	190037795	Enhancer	MTAPP2;LEPREL1;LEPREL1;RP11;CLDN1;CLDN16;IL1RAP;GCNT1P3;7SK;CCT6P4	Keratinocyte;Keratinocyte;Keratinocyte;Keratinocyte;Keratinocyte;Keratinocyte;Keratinocyte;Keratinocyte;Keratinocyte;Keratinocyte
chr3	190235342	190235542	Enhancer	MTAPP2;LEPREL1;LEPREL1;CLDN1;CLDN16;IL1RAP;GCNT1P3;7SK;CCT6P4;RP11	Keratinocyte;Keratinocyte;Keratinocyte;Keratinocyte;Keratinocyte;Keratinocyte;Keratinocyte;Keratinocyte;Keratinocyte;Keratinocyte
chr3	190245010	190245210	Enhancer	MTAPP2;LEPREL1;LEPREL1;CLDN1;CLDN16;IL1RAP;GCNT1P3;7SK;CCT6P4;RP11	Keratinocyte;Keratinocyte;Keratinocyte;Keratinocyte;Keratinocyte;Keratinocyte;Keratinocyte;Keratinocyte;Keratinocyte;Keratinocyte
chr3	191074432	191074632	Enhancer	OSTN;OSTN;CCDC50;UTS2D;PYDC2	Keratinocyte;Keratinocyte;Keratinocyte;Keratinocyte;Keratinocyte
chr3	192568296	192568496	Enhancer	MB21D2;VEZF1P1	Keratinocyte;Keratinocyte
chr3	193523246	193523446	Enhancer	OPA1;HES1	Keratinocyte;Keratinocyte
chr3	193546392	193546592	Enhancer	OPA1;OPA1;HES1	Keratinocyte;Keratinocyte;Keratinocyte
chr3	193589837	193590037	Enhancer	ATP13A4;OPA1;HES1	Keratinocyte;Keratinocyte;Keratinocyte
chr3	193876479	193876679	Enhancer	OPA1;HES1;ATP13A3	Keratinocyte;Keratinocyte;Keratinocyte
chr3	194014381	194014581	Enhancer	AC046143.3;TMEM44;LSG1;FAM43A	Keratinocyte;Keratinocyte;Keratinocyte;Keratinocyte
chr3	194014430	194014630	Enhancer	AC046143.3;TMEM44;LSG1;FAM43A	Keratinocyte;Keratinocyte;Keratinocyte;Keratinocyte
chr3	194435864	194436064	Enhancer	AC046143.5;LSG1;FAM43A	Keratinocyte;Keratinocyte;Keratinocyte
chr3	194760031	194760231	Enhancer	AC046143.3;AC091633.2	Keratinocyte;Keratinocyte
chr3	194808157	194808357	Enhancer	LSG1;FAM43A;XXYLT1;ACAP2;AC091633.2;SDHAP2	Keratinocyte;Keratinocyte;Keratinocyte;Keratinocyte;Keratinocyte;Keratinocyte
chr3	194808278	194808478	Enhancer	LSG1;FAM43A;XXYLT1;ACAP2;AC091633.2;SDHAP2	Keratinocyte;Keratinocyte;Keratinocyte;Keratinocyte;Keratinocyte;Keratinocyte
chr3	194906331	194906531	Enhancer	XXYLT1;ACAP2;ACAP2;PPP1R2;AC091633.2;SDHAP2	Keratinocyte;Keratinocyte;Keratinocyte;Keratinocyte;Keratinocyte;Keratinocyte
chr3	194908920	194909120	Enhancer	XXYLT1;ACAP2;ACAP2;PPP1R2;AC091633.2;SDHAP2	Keratinocyte;Keratinocyte;Keratinocyte;Keratinocyte;Keratinocyte;Keratinocyte
chr3	195074204	195074404	Enhancer	XXYLT1;ACAP2;ACAP2;PPP1R2;AC091633.2;SDHAP2;SDHAP1	Keratinocyte;Keratinocyte;Keratinocyte;Keratinocyte;Keratinocyte;Keratinocyte;Keratinocyte
chr3	195109054	195109254	Enhancer	ACAP2;PPP1R2;AC091633.2;SDHAP2	Keratinocyte;Keratinocyte;Keratinocyte;Keratinocyte
chr3	195590898	195591098	Enhancer	AC124944.2;TNK2;AC124944.3;AC024937.6;RP11;SDHAP1;AC024937.4;AC024937.2;TFRC;PCYT1A	Keratinocyte;Keratinocyte;Keratinocyte;Keratinocyte;Keratinocyte;Keratinocyte;Keratinocyte;Keratinocyte;Keratinocyte;Keratinocyte
chr3	195590956	195591156	Enhancer	AC124944.2;TNK2;AC124944.3;AC024937.6;RP11;SDHAP1;AC024937.4;AC024937.2;TFRC;PCYT1A	Keratinocyte;Keratinocyte;Keratinocyte;Keratinocyte;Keratinocyte;Keratinocyte;Keratinocyte;Keratinocyte;Keratinocyte;Keratinocyte
chr3	195835367	195835567	Enhancer	SDHAP2;AC124944.2;TNK2;AC024937.6;AC024937.2;PCYT1A;TCTEX1D2;TM4SF19;AC092933.3;FBXO45	Keratinocyte;Keratinocyte;Keratinocyte;Keratinocyte;Keratinocyte;Keratinocyte;Keratinocyte;Keratinocyte;Keratinocyte;Keratinocyte
chr3	195869909	195870109	Enhancer	AC091633.2;SDHAP2;SDHAP1;AC139666.1;PCYT1A;TCTEX1D2;TM4SF19	Keratinocyte;Keratinocyte;Keratinocyte;Keratinocyte;Keratinocyte;Keratinocyte;Keratinocyte
chr3	195870149	195870349	Enhancer	AC091633.2;SDHAP2;SDHAP1;AC139666.1;PCYT1A;TCTEX1D2;TM4SF19	Keratinocyte;Keratinocyte;Keratinocyte;Keratinocyte;Keratinocyte;Keratinocyte;Keratinocyte
chr3	196377715	196377915	Enhancer	TCTEX1D2;LRRC33;PIGX;CEP19;SENP5;AC127904.2;NCBP2;AC011322.1;MFI2	Keratinocyte;Keratinocyte;Keratinocyte;Keratinocyte;Keratinocyte;Keratinocyte;Keratinocyte;Keratinocyte;Keratinocyte
chr3	197044477	197044677	Enhancer	SENP5;NCBP2;AC092937.2;DLG1;BDH1;AC024560.3;RP11;FYTTD1;KIAA0226;LRCH3;AC055764.1;AC144530.1;RPL35A;LMLN	Keratinocyte;Keratinocyte;Keratinocyte;Keratinocyte;Keratinocyte;Keratinocyte;Keratinocyte;Keratinocyte;Keratinocyte;Keratinocyte;Keratinocyte;Keratinocyte;Keratinocyte;Keratinocyte
chr3	197091495	197091695	Enhancer	AC092937.2;BDH1;AC024560.3;RP11;FYTTD1;KIAA0226;LRCH3;AC144530.1;RPL35A	Keratinocyte;Keratinocyte;Keratinocyte;Keratinocyte;Keratinocyte;Keratinocyte;Keratinocyte;Keratinocyte;Keratinocyte
chr3	197094101	197094301	Enhancer	AC011322.1;MFI2;AC092937.2;BDH1;AC024560.3;RP11;FYTTD1;KIAA0226;LRCH3;AC144530.1;RPL35A;LMLN	Keratinocyte;Keratinocyte;Keratinocyte;Keratinocyte;Keratinocyte;Keratinocyte;Keratinocyte;Keratinocyte;Keratinocyte;Keratinocyte;Keratinocyte;Keratinocyte
chr3	197094495	197094695	Enhancer	AC011322.1;MFI2;AC092937.2;BDH1;AC024560.3;RP11;FYTTD1;KIAA0226;LRCH3;AC144530.1;RPL35A;LMLN	Keratinocyte;Keratinocyte;Keratinocyte;Keratinocyte;Keratinocyte;Keratinocyte;Keratinocyte;Keratinocyte;Keratinocyte;Keratinocyte;Keratinocyte;Keratinocyte
chr3	197098972	197099172	Enhancer	AC011322.1;MFI2;AC092937.2;DLG1;BDH1;AC024560.3;RP11;FYTTD1;KIAA0226;LRCH3;AC144530.1;RPL35A;LMLN	Keratinocyte;Keratinocyte;Keratinocyte;Keratinocyte;Keratinocyte;Keratinocyte;Keratinocyte;Keratinocyte;Keratinocyte;Keratinocyte;Keratinocyte;Keratinocyte;Keratinocyte
chr3	197099376	197099576	Enhancer	AC011322.1;MFI2;AC092937.2;DLG1;BDH1;AC024560.3;RP11;FYTTD1;KIAA0226;LRCH3;AC144530.1;RPL35A;LMLN	Keratinocyte;Keratinocyte;Keratinocyte;Keratinocyte;Keratinocyte;Keratinocyte;Keratinocyte;Keratinocyte;Keratinocyte;Keratinocyte;Keratinocyte;Keratinocyte;Keratinocyte
chr3	197107719	197107919	Enhancer	PAK2;AC011322.1;MFI2;MFI2;AC092937.2;DLG1;BDH1;AC024560.3;RP11;FYTTD1;KIAA0226;LRCH3;AC144530.1;RPL35A	Keratinocyte;Keratinocyte;Keratinocyte;Keratinocyte;Keratinocyte;Keratinocyte;Keratinocyte;Keratinocyte;Keratinocyte;Keratinocyte;Keratinocyte;Keratinocyte;Keratinocyte;Keratinocyte
chr3	197121310	197121510	Enhancer	PAK2;AC011322.1;MFI2;MFI2;AC092937.2;DLG1;BDH1;AC024560.3;RP11;FYTTD1;KIAA0226;LRCH3;AC144530.1;RPL35A	Keratinocyte;Keratinocyte;Keratinocyte;Keratinocyte;Keratinocyte;Keratinocyte;Keratinocyte;Keratinocyte;Keratinocyte;Keratinocyte;Keratinocyte;Keratinocyte;Keratinocyte;Keratinocyte
chr3	197122040	197122240	Enhancer	PAK2;AC011322.1;MFI2;MFI2;AC092937.2;DLG1;BDH1;AC024560.3;RP11;FYTTD1;KIAA0226;LRCH3;AC144530.1;RPL35A	Keratinocyte;Keratinocyte;Keratinocyte;Keratinocyte;Keratinocyte;Keratinocyte;Keratinocyte;Keratinocyte;Keratinocyte;Keratinocyte;Keratinocyte;Keratinocyte;Keratinocyte;Keratinocyte
chr3	197205982	197206182	Enhancer	AC011322.1;AC092937.2;DLG1;AC128709.4;BDH1;AC024560.3;RP11;FYTTD1;KIAA0226;LRCH3;AC144530.1;RPL35A	Keratinocyte;Keratinocyte;Keratinocyte;Keratinocyte;Keratinocyte;Keratinocyte;Keratinocyte;Keratinocyte;Keratinocyte;Keratinocyte;Keratinocyte;Keratinocyte
chr3	197239595	197239795	Enhancer	AC011322.1;AC092937.2;DLG1;AC128709.4;AC128709.3;AC128709.2;AC128709.1;BDH1;AC024560.3;RP11;FYTTD1;KIAA0226;LRCH3;AC055764.1;AC144530.1;RPL35A;LMLN	Keratinocyte;Keratinocyte;Keratinocyte;Keratinocyte;Keratinocyte;Keratinocyte;Keratinocyte;Keratinocyte;Keratinocyte;Keratinocyte;Keratinocyte;Keratinocyte;Keratinocyte;Keratinocyte;Keratinocyte;Keratinocyte;Keratinocyte
chr3	197239598	197239798	Enhancer	AC011322.1;AC092937.2;DLG1;AC128709.4;AC128709.3;AC128709.2;AC128709.1;BDH1;AC024560.3;RP11;FYTTD1;KIAA0226;LRCH3;AC055764.1;AC144530.1;RPL35A;LMLN	Keratinocyte;Keratinocyte;Keratinocyte;Keratinocyte;Keratinocyte;Keratinocyte;Keratinocyte;Keratinocyte;Keratinocyte;Keratinocyte;Keratinocyte;Keratinocyte;Keratinocyte;Keratinocyte;Keratinocyte;Keratinocyte;Keratinocyte
chr3	197241173	197241373	Enhancer	AC011322.1;AC092937.2;DLG1;AC128709.4;AC128709.3;AC128709.2;AC128709.1;BDH1;AC024560.3;RP11;FYTTD1;KIAA0226;LRCH3;AC144530.1;RPL35A;IQCG;LMLN	Keratinocyte;Keratinocyte;Keratinocyte;Keratinocyte;Keratinocyte;Keratinocyte;Keratinocyte;Keratinocyte;Keratinocyte;Keratinocyte;Keratinocyte;Keratinocyte;Keratinocyte;Keratinocyte;Keratinocyte;Keratinocyte;Keratinocyte
chr3	197241411	197241611	Enhancer	AC011322.1;AC092937.2;DLG1;AC128709.4;AC128709.3;AC128709.2;AC128709.1;BDH1;AC024560.3;RP11;FYTTD1;KIAA0226;LRCH3;AC144530.1;RPL35A;IQCG;LMLN	Keratinocyte;Keratinocyte;Keratinocyte;Keratinocyte;Keratinocyte;Keratinocyte;Keratinocyte;Keratinocyte;Keratinocyte;Keratinocyte;Keratinocyte;Keratinocyte;Keratinocyte;Keratinocyte;Keratinocyte;Keratinocyte;Keratinocyte
chr3	197273776	197273976	Enhancer	AC011322.1;AC092937.2;DLG1;AC128709.4;AC128709.3;AC128709.2;AC128709.1;BDH1;AC024560.3;RP11;FYTTD1;KIAA0226;LRCH3;AC144530.1;RPL35A;IQCG;LMLN	Keratinocyte;Keratinocyte;Keratinocyte;Keratinocyte;Keratinocyte;Keratinocyte;Keratinocyte;Keratinocyte;Keratinocyte;Keratinocyte;Keratinocyte;Keratinocyte;Keratinocyte;Keratinocyte;Keratinocyte;Keratinocyte;Keratinocyte
chr3	197445892	197446092	Enhancer	AC092937.2;DLG1;BDH1;RP11;FYTTD1;KIAA0226;LRCH3;AC055764.1;AC144530.1;RPL35A;IQCG;LMLN;AC073135.2	Keratinocyte;Keratinocyte;Keratinocyte;Keratinocyte;Keratinocyte;Keratinocyte;Keratinocyte;Keratinocyte;Keratinocyte;Keratinocyte;Keratinocyte;Keratinocyte;Keratinocyte
chr3	197581949	197582149	Enhancer	BDH1;AC024560.3;RP11;KIAA0226;LRCH3;AC055764.1;AC144530.1;RPL35A;IQCG;LMLN	Keratinocyte;Keratinocyte;Keratinocyte;Keratinocyte;Keratinocyte;Keratinocyte;Keratinocyte;Keratinocyte;Keratinocyte;Keratinocyte
chr4	125958	126158	Enhancer	RP11;ZNF718;Z95704.3	Keratinocyte;Keratinocyte;Keratinocyte
chr4	512639	512839	Enhancer	ZNF141;ATP5I;RP11;MFSD7;RP11;ABCA11P;GAK;TMEM175;ZNF718;RP11;ZNF721;PDE6B;PIGG	Keratinocyte;Keratinocyte;Keratinocyte;Keratinocyte;Keratinocyte;Keratinocyte;Keratinocyte;Keratinocyte;Keratinocyte;Keratinocyte;Keratinocyte;Keratinocyte;Keratinocyte
chr4	512908	513108	Enhancer	ZNF141;ATP5I;RP11;MFSD7;RP11;ABCA11P;GAK;TMEM175;ZNF718;RP11;ZNF721;PDE6B;PIGG	Keratinocyte;Keratinocyte;Keratinocyte;Keratinocyte;Keratinocyte;Keratinocyte;Keratinocyte;Keratinocyte;Keratinocyte;Keratinocyte;Keratinocyte;Keratinocyte;Keratinocyte
chr4	715765	715965	Enhancer	CPLX1;ATP5I;MFSD7;PCGF3;RP11;MYL5;RP11;DGKQ;SLC26A1;IDUA;ZNF721;PDE6B;PIGG	Keratinocyte;Keratinocyte;Keratinocyte;Keratinocyte;Keratinocyte;Keratinocyte;Keratinocyte;Keratinocyte;Keratinocyte;Keratinocyte;Keratinocyte;Keratinocyte;Keratinocyte
chr4	715772	715972	Enhancer	CPLX1;ATP5I;MFSD7;PCGF3;RP11;MYL5;RP11;DGKQ;SLC26A1;IDUA;ZNF721;PDE6B;PIGG	Keratinocyte;Keratinocyte;Keratinocyte;Keratinocyte;Keratinocyte;Keratinocyte;Keratinocyte;Keratinocyte;Keratinocyte;Keratinocyte;Keratinocyte;Keratinocyte;Keratinocyte
chr4	715850	716050	Enhancer	CPLX1;ATP5I;MFSD7;PCGF3;RP11;MYL5;RP11;DGKQ;SLC26A1;IDUA;ZNF721;PDE6B;PIGG	Keratinocyte;Keratinocyte;Keratinocyte;Keratinocyte;Keratinocyte;Keratinocyte;Keratinocyte;Keratinocyte;Keratinocyte;Keratinocyte;Keratinocyte;Keratinocyte;Keratinocyte
chr4	726597	726797	Enhancer	ATP5I;MFSD7;PCGF3;MYL5;RP11;RP11;RP11;AC092574.2;PDE6B;PIGG	HUVEC;HUVEC;HUVEC;HUVEC;HUVEC;HUVEC;HUVEC;HUVEC;HUVEC;HUVEC
chr4	955369	955569	Enhancer	ATP5I;MFSD7;PCGF3;MYL5;GAK;TMEM175;RP11;DGKQ;SLC26A1;IDUA;PDE6B;PIGG;FGFRL1;CTBP1;CTBP1;MAEA;CRIPAK	Keratinocyte;Keratinocyte;Keratinocyte;Keratinocyte;Keratinocyte;Keratinocyte;Keratinocyte;Keratinocyte;Keratinocyte;Keratinocyte;Keratinocyte;Keratinocyte;Keratinocyte;Keratinocyte;Keratinocyte;Keratinocyte;Keratinocyte
chr4	955783	955983	Enhancer	ATP5I;MFSD7;PCGF3;MYL5;GAK;TMEM175;RP11;DGKQ;SLC26A1;IDUA;PDE6B;PIGG;FGFRL1;RNF212;SPON2;CTBP1;CTBP1;RP11;MAEA;KIAA1530;CRIPAK	Keratinocyte;Keratinocyte;Keratinocyte;Keratinocyte;Keratinocyte;Keratinocyte;Keratinocyte;Keratinocyte;Keratinocyte;Keratinocyte;Keratinocyte;Keratinocyte;Keratinocyte;Keratinocyte;Keratinocyte;Keratinocyte;Keratinocyte;Keratinocyte;Keratinocyte;Keratinocyte;Keratinocyte
chr4	955805	956005	Enhancer	ATP5I;MFSD7;PCGF3;MYL5;GAK;TMEM175;RP11;DGKQ;SLC26A1;IDUA;PDE6B;PIGG;FGFRL1;RNF212;SPON2;CTBP1;CTBP1;RP11;MAEA;KIAA1530;CRIPAK	Keratinocyte;Keratinocyte;Keratinocyte;Keratinocyte;Keratinocyte;Keratinocyte;Keratinocyte;Keratinocyte;Keratinocyte;Keratinocyte;Keratinocyte;Keratinocyte;Keratinocyte;Keratinocyte;Keratinocyte;Keratinocyte;Keratinocyte;Keratinocyte;Keratinocyte;Keratinocyte;Keratinocyte
chr4	956019	956219	Enhancer	ATP5I;MFSD7;PCGF3;MYL5;GAK;TMEM175;RP11;DGKQ;SLC26A1;IDUA;PDE6B;PIGG;FGFRL1;RNF212;SPON2;CTBP1;CTBP1;RP11;MAEA;KIAA1530;CRIPAK	Keratinocyte;Keratinocyte;Keratinocyte;Keratinocyte;Keratinocyte;Keratinocyte;Keratinocyte;Keratinocyte;Keratinocyte;Keratinocyte;Keratinocyte;Keratinocyte;Keratinocyte;Keratinocyte;Keratinocyte;Keratinocyte;Keratinocyte;Keratinocyte;Keratinocyte;Keratinocyte;Keratinocyte
chr4	1225407	1225607	Enhancer	GAK;TMEM175;DGKQ;IDUA;SPON2;CTBP1;CTBP1;RP11;MAEA;KIAA1530;AC078852.1;CRIPAK	Keratinocyte;Keratinocyte;Keratinocyte;Keratinocyte;Keratinocyte;Keratinocyte;Keratinocyte;Keratinocyte;Keratinocyte;Keratinocyte;Keratinocyte;Keratinocyte
chr4	1225629	1225829	Enhancer	GAK;TMEM175;DGKQ;IDUA;SPON2;CTBP1;CTBP1;RP11;MAEA;KIAA1530;AC078852.1;CRIPAK	Keratinocyte;Keratinocyte;Keratinocyte;Keratinocyte;Keratinocyte;Keratinocyte;Keratinocyte;Keratinocyte;Keratinocyte;Keratinocyte;Keratinocyte;Keratinocyte
chr4	1294862	1295062	Enhancer	GAK;TMEM175;DGKQ;SLC26A1;IDUA;FGFRL1;AC092535.3;SPON2;CTBP1;CTBP1;RP11;MAEA;KIAA1530;AC078852.1;CRIPAK	Keratinocyte;Keratinocyte;Keratinocyte;Keratinocyte;Keratinocyte;Keratinocyte;Keratinocyte;Keratinocyte;Keratinocyte;Keratinocyte;Keratinocyte;Keratinocyte;Keratinocyte;Keratinocyte;Keratinocyte
chr4	1728945	1729145	Enhancer	RP11;FAM53A;SLBP;TMEM129;TACC3;AC016773.1;LETM1;WHSC1;AL132868.1	HUVEC;HUVEC;HUVEC;HUVEC;HUVEC;HUVEC;HUVEC;HUVEC;HUVEC
chr4	2797101	2797301	Enhancer	TNIP2;SH3BP2;ADD1;MFSD10;NOP14;NOP14;GRK4;HTT	Keratinocyte;Keratinocyte;Keratinocyte;Keratinocyte;Keratinocyte;Keratinocyte;Keratinocyte;Keratinocyte
chr4	2797837	2798037	Enhancer	FAM193A;TNIP2;SH3BP2;ADD1;MFSD10;NOP14;NOP14;GRK4;HTT	Keratinocyte;Keratinocyte;Keratinocyte;Keratinocyte;Keratinocyte;Keratinocyte;Keratinocyte;Keratinocyte;Keratinocyte
chr4	2798058	2798258	Enhancer	FAM193A;TNIP2;SH3BP2;ADD1;MFSD10;NOP14;NOP14;GRK4;HTT	Keratinocyte;Keratinocyte;Keratinocyte;Keratinocyte;Keratinocyte;Keratinocyte;Keratinocyte;Keratinocyte;Keratinocyte
chr4	2798583	2798783	Enhancer	FAM193A;TNIP2;SH3BP2;ADD1;MFSD10;NOP14;NOP14;GRK4;HTT	Keratinocyte;Keratinocyte;Keratinocyte;Keratinocyte;Keratinocyte;Keratinocyte;Keratinocyte;Keratinocyte;Keratinocyte
chr4	3392003	3392203	Enhancer	RGS12;DOK7;RP11;LRPAP1	Keratinocyte;Keratinocyte;Keratinocyte;Keratinocyte
chr4	3392218	3392418	Enhancer	RGS12;DOK7;RP11;LRPAP1	Keratinocyte;Keratinocyte;Keratinocyte;Keratinocyte
chr4	3438479	3438679	Enhancer	DOK7;RP11;LRPAP1	Keratinocyte;Keratinocyte;Keratinocyte
chr4	3486914	3487114	Enhancer	RGS12;DOK7;RP11;LRPAP1	Keratinocyte;Keratinocyte;Keratinocyte;Keratinocyte
chr4	4310389	4310589	Enhancer	LYAR;ZBTB49;NSG1;RP11	Keratinocyte;Keratinocyte;Keratinocyte;Keratinocyte
chr4	6450969	6451169	Enhancer	WFS1;MRFAP1;MRFAP1L1;CNO;KIAA0232	Keratinocyte;Keratinocyte;Keratinocyte;Keratinocyte;Keratinocyte
chr4	6748843	6749043	Enhancer	PPP2R2C;MAN2B2;MRFAP1;RP11;MRFAP1L1;CNO;TBC1D14;TADA2B;RP11;GRPEL1	Keratinocyte;Keratinocyte;Keratinocyte;Keratinocyte;Keratinocyte;Keratinocyte;Keratinocyte;Keratinocyte;Keratinocyte;Keratinocyte
chr4	6765242	6765442	Enhancer	MAN2B2;MRFAP1;MRFAP1L1;CNO;TADA2B;GRPEL1	Keratinocyte;Keratinocyte;Keratinocyte;Keratinocyte;Keratinocyte;Keratinocyte
chr4	6836596	6836796	Enhancer	WFS1;PPP2R2C;MAN2B2;MRFAP1;AC093323.3;RP11;S100P;MRFAP1L1;CNO;KIAA0232;TADA2B;CCDC96;RP11;GRPEL1	Keratinocyte;Keratinocyte;Keratinocyte;Keratinocyte;Keratinocyte;Keratinocyte;Keratinocyte;Keratinocyte;Keratinocyte;Keratinocyte;Keratinocyte;Keratinocyte;Keratinocyte;Keratinocyte
chr4	7000610	7000810	Enhancer	MRFAP1;AC093323.3;S100P;MRFAP1L1;CNO;KIAA0232;TBC1D14;7SK;TADA2B;CCDC96;RP11;GRPEL1;RP11;SORCS2	Keratinocyte;Keratinocyte;Keratinocyte;Keratinocyte;Keratinocyte;Keratinocyte;Keratinocyte;Keratinocyte;Keratinocyte;Keratinocyte;Keratinocyte;Keratinocyte;Keratinocyte;Keratinocyte
chr4	7000628	7000828	Enhancer	MRFAP1;AC093323.3;S100P;MRFAP1L1;CNO;KIAA0232;TBC1D14;7SK;TADA2B;CCDC96;RP11;GRPEL1;RP11;SORCS2	Keratinocyte;Keratinocyte;Keratinocyte;Keratinocyte;Keratinocyte;Keratinocyte;Keratinocyte;Keratinocyte;Keratinocyte;Keratinocyte;Keratinocyte;Keratinocyte;Keratinocyte;Keratinocyte
chr4	7000782	7000982	Enhancer	MRFAP1;AC093323.3;S100P;MRFAP1L1;CNO;KIAA0232;TBC1D14;7SK;TADA2B;CCDC96;RP11;GRPEL1;RP11;SORCS2	Keratinocyte;Keratinocyte;Keratinocyte;Keratinocyte;Keratinocyte;Keratinocyte;Keratinocyte;Keratinocyte;Keratinocyte;Keratinocyte;Keratinocyte;Keratinocyte;Keratinocyte;Keratinocyte
chr4	7282905	7283105	Enhancer	MRFAP1;MRFAP1L1;CNO;TBC1D14;TADA2B;GRPEL1	Keratinocyte;Keratinocyte;Keratinocyte;Keratinocyte;Keratinocyte;Keratinocyte
chr4	7283084	7283284	Enhancer	MRFAP1;MRFAP1L1;CNO;TBC1D14;TADA2B;GRPEL1	Keratinocyte;Keratinocyte;Keratinocyte;Keratinocyte;Keratinocyte;Keratinocyte
chr4	8032202	8032402	Enhancer	AC097381.1;METTL19	Keratinocyte;Keratinocyte
chr4	8453484	8453684	Enhancer	METTL19;ACOX3;RP11	Keratinocyte;Keratinocyte;Keratinocyte
chr4	10094637	10094837	Enhancer	RP11;SLC2A9;RP11;WDR1;RP11;RP11;ZNF518B	Keratinocyte;Keratinocyte;Keratinocyte;Keratinocyte;Keratinocyte;Keratinocyte;Keratinocyte
chr4	11406097	11406297	Enhancer	RNPS1P1	Keratinocyte
chr4	11700761	11700961	Enhancer	RNPS1P1	Keratinocyte
chr4	14881333	14881533	Enhancer	LINC00504;CPEB2	Keratinocyte;Keratinocyte
chr4	14881346	14881546	Enhancer	LINC00504;CPEB2	Keratinocyte;Keratinocyte
chr4	15939762	15939962	Enhancer	FAM200B;FBXL5;RP11;FGFBP1	Keratinocyte;Keratinocyte;Keratinocyte;Keratinocyte
chr4	17772928	17773128	Enhancer	QDPR;FAM184B;DCAF16;NCAPG	Keratinocyte;Keratinocyte;Keratinocyte;Keratinocyte
chr4	22387173	22387373	Enhancer	GPR125;RP11	Keratinocyte;Keratinocyte
chr4	24274865	24275065	Enhancer	ATP5LP3	Keratinocyte
chr4	24806677	24806877	Enhancer	DHX15	Keratinocyte
chr4	25301610	25301810	Enhancer	ZCCHC4;RP11	Keratinocyte;Keratinocyte
chr4	25789290	25789490	Enhancer	C4orf52;SEL1L3;RBPJ	Keratinocyte;Keratinocyte;Keratinocyte
chr4	25955417	25955617	Enhancer	RP11;C4orf52;SEL1L3	Keratinocyte;Keratinocyte;Keratinocyte
chr4	26060175	26060375	Enhancer	C4orf52;SEL1L3	Keratinocyte;Keratinocyte
chr4	26128805	26129005	Enhancer	C4orf52;SEL1L3	Keratinocyte;Keratinocyte
chr4	26781849	26782049	Enhancer	RP11	Keratinocyte
chr4	30952484	30952684	Enhancer	PCDH7	Keratinocyte
chr4	37642814	37643014	Enhancer	TBC1D1;AC021106.1;RP11	Keratinocyte;Keratinocyte;Keratinocyte
chr4	37719293	37719493	Enhancer	AC021106.1;RP11	Keratinocyte;Keratinocyte
chr4	37759396	37759596	Enhancer	TBC1D1	Keratinocyte
chr4	37759449	37759649	Enhancer	TBC1D1	Keratinocyte
chr4	38103301	38103501	Enhancer	PGM2;RP11;KLF3	Keratinocyte;Keratinocyte;Keratinocyte
chr4	38156449	38156649	Enhancer	TBC1D1;RP11	Keratinocyte;Keratinocyte
chr4	38157353	38157553	Enhancer	TBC1D1;RP11	Keratinocyte;Keratinocyte
chr4	38157423	38157623	Enhancer	TBC1D1;RP11	Keratinocyte;Keratinocyte
chr4	38232199	38232399	Enhancer	RP11;PGM2;TBC1D1;AC021106.1	Keratinocyte;Keratinocyte;Keratinocyte;Keratinocyte
chr4	38276959	38277159	Enhancer	TBC1D1;AC021106.1;RP11;KLF3	Keratinocyte;Keratinocyte;Keratinocyte;Keratinocyte
chr4	38386535	38386735	Enhancer	AC021106.1;KLF3	Keratinocyte;Keratinocyte
chr4	38386543	38386743	Enhancer	AC021106.1;KLF3	Keratinocyte;Keratinocyte
chr4	38566868	38567068	Enhancer	AC021860.1;FAM114A1	Keratinocyte;Keratinocyte
chr4	38566947	38567147	Enhancer	AC021860.1;FAM114A1	Keratinocyte;Keratinocyte
chr4	38567384	38567584	Enhancer	AC021860.1;FAM114A1	Keratinocyte;Keratinocyte
chr4	38689248	38689448	Enhancer	KLF3;AC021860.1;RP11;TLR10;TLR6;TLR1;FAM114A1	Keratinocyte;Keratinocyte;Keratinocyte;Keratinocyte;Keratinocyte;Keratinocyte;Keratinocyte
chr4	39570511	39570711	Enhancer	RP11;UGDH;UGDH;RP11;AC105287.1;ZBTB12B;RP11;PABPC1P1;PDS5A	Keratinocyte;Keratinocyte;Keratinocyte;Keratinocyte;Keratinocyte;Keratinocyte;Keratinocyte;Keratinocyte;Keratinocyte
chr4	39937821	39938021	Enhancer	UGDH;UBE2K;RP11;PABPC1P1;PDS5A;KRT18P25	Keratinocyte;Keratinocyte;Keratinocyte;Keratinocyte;Keratinocyte;Keratinocyte
chr4	39938629	39938829	Enhancer	UGDH;UBE2K;RP11;PABPC1P1;PDS5A;KRT18P25	Keratinocyte;Keratinocyte;Keratinocyte;Keratinocyte;Keratinocyte;Keratinocyte
chr4	40365385	40365585	Enhancer	RP11;PABPC1P1;PDS5A;KRT18P25;RP11;CHRNA9	Keratinocyte;Keratinocyte;Keratinocyte;Keratinocyte;Keratinocyte;Keratinocyte
chr4	40365653	40365853	Enhancer	RP11;PABPC1P1;PDS5A;KRT18P25;RP11;CHRNA9	Keratinocyte;Keratinocyte;Keratinocyte;Keratinocyte;Keratinocyte;Keratinocyte
chr4	41138083	41138283	Enhancer	RP11;APBB2;UCHL1;LIMCH1	Keratinocyte;Keratinocyte;Keratinocyte;Keratinocyte
chr4	47488275	47488475	Enhancer	COMMD8;ATP10D;RP11;AC092597.3	Keratinocyte;Keratinocyte;Keratinocyte;Keratinocyte
chr4	47488520	47488720	Enhancer	COMMD8;ATP10D;RP11;AC092597.3	Keratinocyte;Keratinocyte;Keratinocyte;Keratinocyte
chr4	48377624	48377824	Enhancer	TEC;SLAIN2;FRYL;OCIAD1;OCIAD1;OCIAD2;TPI1P4	Keratinocyte;Keratinocyte;Keratinocyte;Keratinocyte;Keratinocyte;Keratinocyte;Keratinocyte
chr4	48622900	48623100	Enhancer	FRYL;OCIAD1;OCIAD1;OCIAD2;CWH43;TPI1P4	Keratinocyte;Keratinocyte;Keratinocyte;Keratinocyte;Keratinocyte;Keratinocyte
chr4	48654066	48654266	Enhancer	SLAIN2;FRYL;OCIAD1;OCIAD1;OCIAD2;CWH43;TPI1P4	Keratinocyte;Keratinocyte;Keratinocyte;Keratinocyte;Keratinocyte;Keratinocyte;Keratinocyte
chr4	48670646	48670846	Enhancer	SLAIN2;FRYL;OCIAD1;OCIAD1;OCIAD2;CWH43;TPI1P4	Keratinocyte;Keratinocyte;Keratinocyte;Keratinocyte;Keratinocyte;Keratinocyte;Keratinocyte
chr4	48952016	48952216	Enhancer	SLAIN2;FRYL;OCIAD1;OCIAD1;OCIAD2;CWH43;TPI1P4	Keratinocyte;Keratinocyte;Keratinocyte;Keratinocyte;Keratinocyte;Keratinocyte;Keratinocyte
chr4	53714223	53714423	Enhancer	DANCR	Keratinocyte
chr4	55365103	55365303	Enhancer	CHIC2	Keratinocyte
chr4	55454727	55454927	Enhancer	RP11	Keratinocyte
chr4	55455074	55455274	Enhancer	RP11	Keratinocyte
chr4	56245007	56245207	Enhancer	SRD5A3;RP11;RP11;TMEM165;CLOCK;NMU	Keratinocyte;Keratinocyte;Keratinocyte;Keratinocyte;Keratinocyte;Keratinocyte
chr4	56475237	56475437	Enhancer	SRD5A3;RP11;RP11;TMEM165;NMU	Keratinocyte;Keratinocyte;Keratinocyte;Keratinocyte;Keratinocyte
chr4	56475290	56475490	Enhancer	SRD5A3;RP11;RP11;TMEM165;NMU	Keratinocyte;Keratinocyte;Keratinocyte;Keratinocyte;Keratinocyte
chr4	57479586	57479786	Enhancer	RPL7AP31;HOPX;RP11;REST;POLR2B;NOA1;IGFBP7	Keratinocyte;Keratinocyte;Keratinocyte;Keratinocyte;Keratinocyte;Keratinocyte;Keratinocyte
chr4	57603955	57604155	Enhancer	RPL7AP31;AASDH;PPAT;PAICS;SRP72;RP11;NOA1;RP11;IGFBP7	Keratinocyte;Keratinocyte;Keratinocyte;Keratinocyte;Keratinocyte;Keratinocyte;Keratinocyte;Keratinocyte;Keratinocyte
chr4	57985160	57985360	Enhancer	SRP72;HOPX;RP11;REST;POLR2B;NOA1;RP11;UBE2CP3;RP11;IGFBP7	Keratinocyte;Keratinocyte;Keratinocyte;Keratinocyte;Keratinocyte;Keratinocyte;Keratinocyte;Keratinocyte;Keratinocyte;Keratinocyte
chr4	57998325	57998525	Enhancer	RP11;REST;POLR2B;NOA1;RP11;UBE2CP3;RP11;IGFBP7	Keratinocyte;Keratinocyte;Keratinocyte;Keratinocyte;Keratinocyte;Keratinocyte;Keratinocyte;Keratinocyte
chr4	58271645	58271845	Enhancer	RP11	Keratinocyte
chr4	62291021	62291221	Enhancer	RP11;RP11	Keratinocyte;Keratinocyte
chr4	62328386	62328586	Enhancer	RP11	Keratinocyte
chr4	69212794	69212994	Enhancer	GCOM2;RP11;RP11;YTHDC1;MT1P2;TMPRSS11E	Keratinocyte;Keratinocyte;Keratinocyte;Keratinocyte;Keratinocyte;Keratinocyte
chr4	69226779	69226979	Enhancer	GCOM2;RP11;RP11;YTHDC1;MT1P2;TMPRSS11E	Keratinocyte;Keratinocyte;Keratinocyte;Keratinocyte;Keratinocyte;Keratinocyte
chr4	71644925	71645125	Enhancer	UTP3;GRSF1;MOB1B;DCK	HUVEC;HUVEC;HUVEC;HUVEC
chr4	74319081	74319281	Enhancer	AFP;IL8;CXCL1	Keratinocyte;Keratinocyte;Keratinocyte
chr4	74454991	74455191	Enhancer	RASSF6;IL8;CXCL1;CXCL5	Keratinocyte;Keratinocyte;Keratinocyte;Keratinocyte
chr4	74542872	74543072	Enhancer	RASSF6;EPGN	Keratinocyte;Keratinocyte
chr4	75149759	75149959	Enhancer	IL8;CXCL1;RP11;CXCL5;CXCL3;RP11;CXCL2;MTHFD2L;EPGN;EREG;RP11;AREG;AREGB	Keratinocyte;Keratinocyte;Keratinocyte;Keratinocyte;Keratinocyte;Keratinocyte;Keratinocyte;Keratinocyte;Keratinocyte;Keratinocyte;Keratinocyte;Keratinocyte;Keratinocyte
chr4	75274419	75274619	Enhancer	CXCL1;CXCL5;CXCL3;RP11;CXCL2;MTHFD2L;EREG;RP11;AREG;AREGB	Keratinocyte;Keratinocyte;Keratinocyte;Keratinocyte;Keratinocyte;Keratinocyte;Keratinocyte;Keratinocyte;Keratinocyte;Keratinocyte
chr4	75274674	75274874	Enhancer	CXCL1;CXCL5;CXCL3;RP11;CXCL2;MTHFD2L;EREG;RP11;AREG;AREGB	Keratinocyte;Keratinocyte;Keratinocyte;Keratinocyte;Keratinocyte;Keratinocyte;Keratinocyte;Keratinocyte;Keratinocyte;Keratinocyte
chr4	75275862	75276062	Enhancer	CXCL1;CXCL5;CXCL3;RP11;CXCL2;MTHFD2L;EPGN;EREG;RP11;AREG;AREGB	Keratinocyte;Keratinocyte;Keratinocyte;Keratinocyte;Keratinocyte;Keratinocyte;Keratinocyte;Keratinocyte;Keratinocyte;Keratinocyte;Keratinocyte
chr4	77154156	77154356	Enhancer	SDAD1;NUP54;SCARB2;FAM47E;RP11;STBD1	Keratinocyte;Keratinocyte;Keratinocyte;Keratinocyte;Keratinocyte;Keratinocyte
chr4	77155831	77156031	Enhancer	SDAD1;NUP54;SCARB2;FAM47E;RP11;STBD1	Keratinocyte;Keratinocyte;Keratinocyte;Keratinocyte;Keratinocyte;Keratinocyte
chr4	77624022	77624222	Enhancer	SNX5P1;AC107072.2;RP11;SEPT11;RP11;CCNI	Keratinocyte;Keratinocyte;Keratinocyte;Keratinocyte;Keratinocyte;Keratinocyte
chr4	77813935	77814135	Enhancer	SOWAHB;SEPT11;RP11	Keratinocyte;Keratinocyte;Keratinocyte
chr4	78096245	78096445	Enhancer	CCNI;RP11;CCNG2	Keratinocyte;Keratinocyte;Keratinocyte
chr4	78096567	78096767	Enhancer	CCNI;RP11;CCNG2	Keratinocyte;Keratinocyte;Keratinocyte
chr4	78098554	78098754	Enhancer	CCNI;RP11;CCNG2	Keratinocyte;Keratinocyte;Keratinocyte
chr4	78803115	78803315	Enhancer	CNOT6L;MRPL1;RP11;RP11;RP11	Keratinocyte;Keratinocyte;Keratinocyte;Keratinocyte;Keratinocyte
chr4	78803323	78803523	Enhancer	CNOT6L;MRPL1;RP11;RP11;RP11	Keratinocyte;Keratinocyte;Keratinocyte;Keratinocyte;Keratinocyte
chr4	78849172	78849372	Enhancer	CNOT6L;MRPL1;RP11;RP11;RP11	Keratinocyte;Keratinocyte;Keratinocyte;Keratinocyte;Keratinocyte
chr4	81229257	81229457	Enhancer	AC097711.1;PRDM8;FGF5;C4orf22;RP11	Keratinocyte;Keratinocyte;Keratinocyte;Keratinocyte;Keratinocyte
chr4	81382611	81382811	Enhancer	AC097711.1;ANTXR2;RP11	Keratinocyte;Keratinocyte;Keratinocyte
chr4	83358704	83358904	Enhancer	HNRNPD;IGBP1P4;HNRPDL;ENOPH1;RPL7AP26;RP11;SCD5;SEC31A;LIN54	Keratinocyte;Keratinocyte;Keratinocyte;Keratinocyte;Keratinocyte;Keratinocyte;Keratinocyte;Keratinocyte;Keratinocyte
chr4	83666455	83666655	Enhancer	HNRNPD;IGBP1P4;HNRPDL;ENOPH1;RPL7AP26;RP11;TMEM150C;RP11;RP11;SCD5;THAP9;RP11;SEC31A;LIN54;COPS4	Keratinocyte;Keratinocyte;Keratinocyte;Keratinocyte;Keratinocyte;Keratinocyte;Keratinocyte;Keratinocyte;Keratinocyte;Keratinocyte;Keratinocyte;Keratinocyte;Keratinocyte;Keratinocyte;Keratinocyte
chr4	83703877	83704077	Enhancer	HNRNPD;IGBP1P4;HNRPDL;ENOPH1;RPL7AP26;RP11;RP11;RP11;SCD5;THAP9;RP11;SEC31A;LIN54;COPS4	Keratinocyte;Keratinocyte;Keratinocyte;Keratinocyte;Keratinocyte;Keratinocyte;Keratinocyte;Keratinocyte;Keratinocyte;Keratinocyte;Keratinocyte;Keratinocyte;Keratinocyte;Keratinocyte
chr4	83718306	83718506	Enhancer	HNRNPD;IGBP1P4;HNRPDL;ENOPH1;RPL7AP26;RP11;RP11;RP11;SCD5;THAP9;RP11;SEC31A;LIN54;COPS4	Keratinocyte;Keratinocyte;Keratinocyte;Keratinocyte;Keratinocyte;Keratinocyte;Keratinocyte;Keratinocyte;Keratinocyte;Keratinocyte;Keratinocyte;Keratinocyte;Keratinocyte;Keratinocyte
chr4	83770011	83770211	Enhancer	HNRNPD;IGBP1P4;HNRPDL;ENOPH1;RP11;RP11;RP11;SCD5;THAP9;RP11;SEC31A;LIN54;COPS4	Keratinocyte;Keratinocyte;Keratinocyte;Keratinocyte;Keratinocyte;Keratinocyte;Keratinocyte;Keratinocyte;Keratinocyte;Keratinocyte;Keratinocyte;Keratinocyte;Keratinocyte
chr4	85505474	85505674	Enhancer	CDS1	Keratinocyte
chr4	85553312	85553512	Enhancer	CDS1	Keratinocyte
chr4	86417650	86417850	Enhancer	ARHGAP24	Keratinocyte
chr4	87752404	87752604	Enhancer	SLC10A6;RP11;RP11;RP11;AFF1;C4orf36;RP11;GAPDHP60;KLHL8	Keratinocyte;Keratinocyte;Keratinocyte;Keratinocyte;Keratinocyte;Keratinocyte;Keratinocyte;Keratinocyte;Keratinocyte
chr4	87766651	87766851	Enhancer	PTPN13;SLC10A6;RP11;RP11;C4orf36;RP11;GAPDHP60;KLHL8	Keratinocyte;Keratinocyte;Keratinocyte;Keratinocyte;Keratinocyte;Keratinocyte;Keratinocyte;Keratinocyte
chr4	87812568	87812768	Enhancer	RP11;RP11;RP11;AFF1;C4orf36;RP11;RP11;GAPDHP60;KLHL8	Keratinocyte;Keratinocyte;Keratinocyte;Keratinocyte;Keratinocyte;Keratinocyte;Keratinocyte;Keratinocyte;Keratinocyte
chr4	87893922	87894122	Enhancer	MAPK10;PTPN13;SLC10A6;RP11;RP11;RP11;AFF1;C4orf36;RP11;GAPDHP60;KLHL8;HSD17B11	Keratinocyte;Keratinocyte;Keratinocyte;Keratinocyte;Keratinocyte;Keratinocyte;Keratinocyte;Keratinocyte;Keratinocyte;Keratinocyte;Keratinocyte;Keratinocyte
chr4	87894198	87894398	Enhancer	MAPK10;PTPN13;SLC10A6;RP11;RP11;RP11;AFF1;C4orf36;RP11;GAPDHP60;KLHL8;HSD17B11	Keratinocyte;Keratinocyte;Keratinocyte;Keratinocyte;Keratinocyte;Keratinocyte;Keratinocyte;Keratinocyte;Keratinocyte;Keratinocyte;Keratinocyte;Keratinocyte
chr4	87895037	87895237	Enhancer	MAPK10;PTPN13;SLC10A6;RP11;RP11;RP11;AFF1;C4orf36;RP11;GAPDHP60;KLHL8;HSD17B11	Keratinocyte;Keratinocyte;Keratinocyte;Keratinocyte;Keratinocyte;Keratinocyte;Keratinocyte;Keratinocyte;Keratinocyte;Keratinocyte;Keratinocyte;Keratinocyte
chr4	87957112	87957312	Enhancer	SLC10A6;RP11;RP11;RP11;AFF1;C4orf36;RP11;GAPDHP60;KLHL8;HSD17B11;RP11;NUDT9	Keratinocyte;Keratinocyte;Keratinocyte;Keratinocyte;Keratinocyte;Keratinocyte;Keratinocyte;Keratinocyte;Keratinocyte;Keratinocyte;Keratinocyte;Keratinocyte
chr4	87982539	87982739	Enhancer	SLC10A6;RP11;RP11;RP11;AFF1;C4orf36;RP11;RP11;GAPDHP60;KLHL8;HSD17B11;RP11;NUDT9	Keratinocyte;Keratinocyte;Keratinocyte;Keratinocyte;Keratinocyte;Keratinocyte;Keratinocyte;Keratinocyte;Keratinocyte;Keratinocyte;Keratinocyte;Keratinocyte;Keratinocyte
chr4	88443457	88443657	Enhancer	RP11	Keratinocyte
chr4	88580796	88580996	Enhancer	NUDT9	HUVEC
chr4	89064832	89065032	Enhancer	HSP90AB3P;SPP1;PKD2;RP11;RP11;RP11;HERC3;PIGY	Keratinocyte;Keratinocyte;Keratinocyte;Keratinocyte;Keratinocyte;Keratinocyte;Keratinocyte;Keratinocyte
chr4	89066296	89066496	Enhancer	HSP90AB3P;SPP1;PKD2;RP11;RP11;RP11;HERC3;PIGY	Keratinocyte;Keratinocyte;Keratinocyte;Keratinocyte;Keratinocyte;Keratinocyte;Keratinocyte;Keratinocyte
chr4	89240117	89240317	Enhancer	PKD2;HERC3;NAP1L5;FAM13A	Keratinocyte;Keratinocyte;Keratinocyte;Keratinocyte
chr4	89443740	89443940	Enhancer	RP11;RP11;HERC3;PIGY;RP11;NAP1L5;FAM13A	Keratinocyte;Keratinocyte;Keratinocyte;Keratinocyte;Keratinocyte;Keratinocyte;Keratinocyte
chr4	90674129	90674329	Enhancer	RP11;SNCA	Keratinocyte;Keratinocyte
chr4	90674936	90675136	Enhancer	RP11;SNCA	Keratinocyte;Keratinocyte
chr4	95183465	95183665	Enhancer	SMARCAD1	Keratinocyte
chr4	95409989	95410189	Enhancer	SMARCAD1;HPGDS;RP11;PDLIM5;BMPR1B	Keratinocyte;Keratinocyte;Keratinocyte;Keratinocyte;Keratinocyte
chr4	95427422	95427622	Enhancer	SMARCAD1;HPGDS;RP11;PDLIM5	Keratinocyte;Keratinocyte;Keratinocyte;Keratinocyte
chr4	99716108	99716308	Enhancer	ADH5;RP11	Keratinocyte;Keratinocyte
chr4	99722885	99723085	Enhancer	ADH5;RP11	Keratinocyte;Keratinocyte
chr4	99811950	99812150	Enhancer	BTF3P13;EIF4E;METAP1;ADH5;RP11	Keratinocyte;Keratinocyte;Keratinocyte;Keratinocyte;Keratinocyte
chr4	100174051	100174251	Enhancer	ADH6	Keratinocyte
chr4	100555127	100555327	Enhancer	LAMTOR3;H2AFZ;RP11	Keratinocyte;Keratinocyte;Keratinocyte
chr4	103490451	103490651	Enhancer	NFKB1;KRT8P46;RP11;RP11;MANBA;RP11;UBE2D3;CISD2	Keratinocyte;Keratinocyte;Keratinocyte;Keratinocyte;Keratinocyte;Keratinocyte;Keratinocyte;Keratinocyte
chr4	103600245	103600445	Enhancer	AF213884.2;NFKB1;KRT8P46;LRRC37A15P;RP11;RP11;MANBA;RP11;UBE2D3;CISD2;SLC9B2;BDH2	Keratinocyte;Keratinocyte;Keratinocyte;Keratinocyte;Keratinocyte;Keratinocyte;Keratinocyte;Keratinocyte;Keratinocyte;Keratinocyte;Keratinocyte;Keratinocyte
chr4	103605522	103605722	Enhancer	NFKB1;KRT8P46;LRRC37A15P;RP11;RP11;MANBA;RP11;UBE2D3;CISD2;SLC9B2;BDH2	Keratinocyte;Keratinocyte;Keratinocyte;Keratinocyte;Keratinocyte;Keratinocyte;Keratinocyte;Keratinocyte;Keratinocyte;Keratinocyte;Keratinocyte
chr4	106070858	106071058	Enhancer	AC004069.1;AC004069.2;TET2	Keratinocyte;Keratinocyte;Keratinocyte
chr4	106635407	106635607	Enhancer	RP11;RP11;GSTCD;INTS12	Keratinocyte;Keratinocyte;Keratinocyte;Keratinocyte
chr4	108783958	108784158	Enhancer	PAPSS1;SGMS2;CYP2U1;RP11;RP11;HADH	Keratinocyte;Keratinocyte;Keratinocyte;Keratinocyte;Keratinocyte;Keratinocyte
chr4	110362913	110363113	Enhancer	RBMXP4;SEC24B;RP11;AC138782.1;SETP20;CCDC109B;HIGD1AP14;CASP6;PLA2G12A;GAR1	Keratinocyte;Keratinocyte;Keratinocyte;Keratinocyte;Keratinocyte;Keratinocyte;Keratinocyte;Keratinocyte;Keratinocyte;Keratinocyte
chr4	110510274	110510474	Enhancer	RBMXP4;SEC24B;RP11;AC138782.1;SETP20;RAC1P5;CCDC109B;HIGD1AP14;PLA2G12A;ELOVL6	Keratinocyte;Keratinocyte;Keratinocyte;Keratinocyte;Keratinocyte;Keratinocyte;Keratinocyte;Keratinocyte;Keratinocyte;Keratinocyte
chr4	110510898	110511098	Enhancer	RBMXP4;SEC24B;RP11;AC138782.1;SETP20;RAC1P5;CCDC109B;HIGD1AP14;PLA2G12A;ELOVL6	Keratinocyte;Keratinocyte;Keratinocyte;Keratinocyte;Keratinocyte;Keratinocyte;Keratinocyte;Keratinocyte;Keratinocyte;Keratinocyte
chr4	110516441	110516641	Enhancer	SETP20;CCDC109B;HIGD1AP14;CASP6;PLA2G12A;CFI;GAR1;RRH	HUVEC;HUVEC;HUVEC;HUVEC;HUVEC;HUVEC;HUVEC;HUVEC
chr4	111040568	111040768	Enhancer	HIGD1AP14;CASP6;PLA2G12A;GAR1;KRT19P3;EGF;RP11;ELOVL6;HSBP1P2	Keratinocyte;Keratinocyte;Keratinocyte;Keratinocyte;Keratinocyte;Keratinocyte;Keratinocyte;Keratinocyte;Keratinocyte
chr4	111049752	111049952	Enhancer	SETP20;PLA2G12A;GAR1;EGF;RP11;ELOVL6;HSBP1P2	Keratinocyte;Keratinocyte;Keratinocyte;Keratinocyte;Keratinocyte;Keratinocyte;Keratinocyte
chr4	111116755	111116955	Enhancer	SETP20;PLA2G12A;GAR1;RP11;ELOVL6;HSBP1P2	Keratinocyte;Keratinocyte;Keratinocyte;Keratinocyte;Keratinocyte;Keratinocyte
chr4	113120492	113120692	Enhancer	RP11;C4orf32;ALPK1;TIFA;AC004049.2;AC004049.3	Keratinocyte;Keratinocyte;Keratinocyte;Keratinocyte;Keratinocyte;Keratinocyte
chr4	113192353	113192553	Enhancer	RP11;C4orf32;RP11;AP1AR;ALPK1;TIFA;AC004049.2;LARP7;RP11	Keratinocyte;Keratinocyte;Keratinocyte;Keratinocyte;Keratinocyte;Keratinocyte;Keratinocyte;Keratinocyte;Keratinocyte
chr4	113192415	113192615	Enhancer	RP11;C4orf32;RP11;AP1AR;ALPK1;TIFA;AC004049.2;LARP7;RP11	Keratinocyte;Keratinocyte;Keratinocyte;Keratinocyte;Keratinocyte;Keratinocyte;Keratinocyte;Keratinocyte;Keratinocyte
chr4	113778617	113778817	Enhancer	ANK2;RP11;RP11	Keratinocyte;Keratinocyte;Keratinocyte
chr4	119318792	119318992	Enhancer	RP11	Keratinocyte
chr4	123811230	123811430	Enhancer	NUDT6;SPATA5	Keratinocyte;Keratinocyte
chr4	128630166	128630366	Enhancer	SLC25A31;LARP1B;INTU	HUVEC;HUVEC;Keratinocyte
chr4	129292485	129292685	Enhancer	RP11;CTD;PGRMC2;RP11	Keratinocyte;Keratinocyte;Keratinocyte;Keratinocyte
chr4	140566634	140566834	Enhancer	NAA15;NDUFC1;MGST2;7SK;H3F3AP6;SCOC	Keratinocyte;Keratinocyte;Keratinocyte;Keratinocyte;Keratinocyte;Keratinocyte
chr4	140739204	140739404	Enhancer	RP11;RAB33B;SETD7;MGST2;7SK;H3F3AP6;SCOC;RP11	Keratinocyte;Keratinocyte;Keratinocyte;Keratinocyte;Keratinocyte;Keratinocyte;Keratinocyte;Keratinocyte
chr4	140808354	140808554	Enhancer	RAB33B;SETD7;MGST2;7SK;H3F3AP6;SCOC;RP11	Keratinocyte;Keratinocyte;Keratinocyte;Keratinocyte;Keratinocyte;Keratinocyte;Keratinocyte
chr4	140808452	140808652	Enhancer	RAB33B;SETD7;MGST2;7SK;H3F3AP6;SCOC;RP11	Keratinocyte;Keratinocyte;Keratinocyte;Keratinocyte;Keratinocyte;Keratinocyte;Keratinocyte
chr4	140810484	140810684	Enhancer	RAB33B;SETD7;MGST2;7SK;H3F3AP6;SCOC;RP11	Keratinocyte;Keratinocyte;Keratinocyte;Keratinocyte;Keratinocyte;Keratinocyte;Keratinocyte
chr4	141107831	141108031	Enhancer	H3F3AP6;RP11;RP11;ELMOD2	Keratinocyte;Keratinocyte;Keratinocyte;Keratinocyte
chr4	141217972	141218172	Enhancer	H3F3AP6;MAML3;SCOC;RP11	Keratinocyte;Keratinocyte;Keratinocyte;Keratinocyte
chr4	144266141	144266341	Enhancer	RP11;USP38;GAB1;AC097658.1;RP11;RP11;SMARCA5;SMARCA5;RP11;GUSBP5	Keratinocyte;Keratinocyte;Keratinocyte;Keratinocyte;Keratinocyte;Keratinocyte;Keratinocyte;Keratinocyte;Keratinocyte;Keratinocyte
chr4	146467691	146467891	Enhancer	SMAD1;RP11;RP11;MMAA;RP11	Keratinocyte;Keratinocyte;Keratinocyte;Keratinocyte;Keratinocyte
chr4	146791167	146791367	Enhancer	MMAA;RP11;ZNF827;LSM6	Keratinocyte;Keratinocyte;Keratinocyte;Keratinocyte
chr4	146802230	146802430	Enhancer	RP11	Keratinocyte
chr4	146803755	146803955	Enhancer	RP11	Keratinocyte
chr4	148635616	148635816	Enhancer	RP11;RP11;GTF2F2P1;TMEM184C	Keratinocyte;Keratinocyte;Keratinocyte;Keratinocyte
chr4	148654601	148654801	Enhancer	RP11;RP11;EDNRA;GTF2F2P1;RP11;TMEM184C;PRMT10;ARHGAP10	Keratinocyte;Keratinocyte;Keratinocyte;Keratinocyte;Keratinocyte;Keratinocyte;Keratinocyte;Keratinocyte
chr4	151644274	151644474	Enhancer	ZBTB8OSP1;RPS3A	Keratinocyte;Keratinocyte
chr4	151956547	151956747	Enhancer	LRBA;AK4P6	Keratinocyte;Keratinocyte
chr4	152340080	152340280	Enhancer	LRBA;AK4P6;RPS3A;SH3D19;RP11;FAM160A1;RP11;RP11;PET112	Keratinocyte;Keratinocyte;Keratinocyte;Keratinocyte;Keratinocyte;Keratinocyte;Keratinocyte;Keratinocyte;Keratinocyte
chr4	152352300	152352500	Enhancer	LRBA;AK4P6;RPS3A;SH3D19;RP11;FAM160A1;RP11;RP11;PET112	Keratinocyte;Keratinocyte;Keratinocyte;Keratinocyte;Keratinocyte;Keratinocyte;Keratinocyte;Keratinocyte;Keratinocyte
chr4	152494743	152494943	Enhancer	SH3D19;RP11;FAM160A1;RP11;RP11;PET112	Keratinocyte;Keratinocyte;Keratinocyte;Keratinocyte;Keratinocyte;Keratinocyte
chr4	152589680	152589880	Enhancer	RP11;FAM160A1;RP11;RP11;PET112	Keratinocyte;Keratinocyte;Keratinocyte;Keratinocyte;Keratinocyte
chr4	152595094	152595294	Enhancer	RPS3A;SH3D19;RP11;FAM160A1;RP11;RP11;PET112	Keratinocyte;Keratinocyte;Keratinocyte;Keratinocyte;Keratinocyte;Keratinocyte;Keratinocyte
chr4	152595459	152595659	Enhancer	RPS3A;SH3D19;RP11;FAM160A1;RP11;RP11;PET112	Keratinocyte;Keratinocyte;Keratinocyte;Keratinocyte;Keratinocyte;Keratinocyte;Keratinocyte
chr4	152595894	152596094	Enhancer	RPS3A;SH3D19;RP11;FAM160A1;RP11;RP11;PET112	Keratinocyte;Keratinocyte;Keratinocyte;Keratinocyte;Keratinocyte;Keratinocyte;Keratinocyte
chr4	152596145	152596345	Enhancer	RPS3A;SH3D19;RP11;FAM160A1;RP11;RP11;PET112	Keratinocyte;Keratinocyte;Keratinocyte;Keratinocyte;Keratinocyte;Keratinocyte;Keratinocyte
chr4	152882079	152882279	Enhancer	RP11	Keratinocyte
chr4	152985298	152985498	Enhancer	RP11;TMEM154	Keratinocyte;Keratinocyte
chr4	153023389	153023589	Enhancer	RP11;TMEM154	Keratinocyte;Keratinocyte
chr4	153186454	153186654	Enhancer	TMEM154;ARFIP1;RP11	Keratinocyte;Keratinocyte;Keratinocyte
chr4	153199723	153199923	Enhancer	TMEM154;ARFIP1;RP11;RP11	Keratinocyte;Keratinocyte;Keratinocyte;Keratinocyte
chr4	153247094	153247294	Enhancer	TMEM154;ARFIP1;RP11;RP11	Keratinocyte;Keratinocyte;Keratinocyte;Keratinocyte
chr4	153249284	153249484	Enhancer	AC079340.1;TMEM154;ARFIP1;RP11	HUVEC;Keratinocyte;Keratinocyte;Keratinocyte
chr4	153621496	153621696	Enhancer	FBXW7;RP11;RP11;RP11;TMEM154;RP11;RP11;FHDC1;ANXA2P1	Keratinocyte;Keratinocyte;Keratinocyte;Keratinocyte;Keratinocyte;Keratinocyte;Keratinocyte;Keratinocyte;Keratinocyte
chr4	153771121	153771321	Enhancer	FBXW7;RP11;RP11;TMEM154;RP11;RP11;FHDC1;TRIM2;ANXA2P1	Keratinocyte;Keratinocyte;Keratinocyte;Keratinocyte;Keratinocyte;Keratinocyte;Keratinocyte;Keratinocyte;Keratinocyte
chr4	153919303	153919503	Enhancer	RP11;TMEM154;ARFIP1;RP11;RP11;FHDC1;ANXA2P1	Keratinocyte;Keratinocyte;Keratinocyte;Keratinocyte;Keratinocyte;Keratinocyte;Keratinocyte
chr4	153919340	153919540	Enhancer	RP11;TMEM154;ARFIP1;RP11;RP11;FHDC1;ANXA2P1	Keratinocyte;Keratinocyte;Keratinocyte;Keratinocyte;Keratinocyte;Keratinocyte;Keratinocyte
chr4	153943374	153943574	Enhancer	TMEM154;TIGD4;ARFIP1;RP11;RP11;FHDC1;ANXA2P1;KIAA0922	Keratinocyte;Keratinocyte;Keratinocyte;Keratinocyte;Keratinocyte;Keratinocyte;Keratinocyte;Keratinocyte
chr4	154216435	154216635	Enhancer	RP11;ANXA2P1;MND1	Keratinocyte;Keratinocyte;Keratinocyte
chr4	154217114	154217314	Enhancer	TMEM154;ARFIP1;RP11;RP11;TRIM2;ANXA2P1;MND1;RP11	Keratinocyte;Keratinocyte;Keratinocyte;Keratinocyte;Keratinocyte;Keratinocyte;Keratinocyte;Keratinocyte
chr4	154218250	154218450	Enhancer	TMEM154;ARFIP1;RP11;RP11;TRIM2;ANXA2P1;MND1;RP11	Keratinocyte;Keratinocyte;Keratinocyte;Keratinocyte;Keratinocyte;Keratinocyte;Keratinocyte;Keratinocyte
chr4	154428355	154428555	Enhancer	KIAA0922	Keratinocyte
chr4	157607407	157607607	Enhancer	PDGFC	Keratinocyte
chr4	157694839	157695039	Enhancer	PDGFC	Keratinocyte
chr4	157694974	157695174	Enhancer	PDGFC	Keratinocyte
chr4	157700202	157700402	Enhancer	PDGFC	Keratinocyte
chr4	157852482	157852682	Enhancer	PDGFC	Keratinocyte
chr4	159132140	159132340	Enhancer	RP11;RP11;TMEM144;RP11;RXFP1	Keratinocyte;Keratinocyte;Keratinocyte;Keratinocyte;Keratinocyte
chr4	159726572	159726772	Enhancer	ETFDH;C4orf46;PPID;FNIP2;RP11;RAPGEF2	Keratinocyte;Keratinocyte;Keratinocyte;Keratinocyte;Keratinocyte;Keratinocyte
chr4	159727012	159727212	Enhancer	ETFDH;C4orf46;PPID;FNIP2;RP11;RAPGEF2	Keratinocyte;Keratinocyte;Keratinocyte;Keratinocyte;Keratinocyte;Keratinocyte
chr4	159727290	159727490	Enhancer	ETFDH;C4orf46;PPID;FNIP2;RP11;RAPGEF2	Keratinocyte;Keratinocyte;Keratinocyte;Keratinocyte;Keratinocyte;Keratinocyte
chr4	159927410	159927610	Enhancer	ETFDH	Keratinocyte
chr4	159927650	159927850	Enhancer	ETFDH	Keratinocyte
chr4	160148462	160148662	Enhancer	RP11;RAPGEF2	Keratinocyte;Keratinocyte
chr4	160148491	160148691	Enhancer	RP11;RAPGEF2	Keratinocyte;Keratinocyte
chr4	160148948	160149148	Enhancer	RP11;RAPGEF2	Keratinocyte;Keratinocyte
chr4	160149160	160149360	Enhancer	RP11;RAPGEF2	Keratinocyte;Keratinocyte
chr4	160149277	160149477	Enhancer	RP11;RAPGEF2	Keratinocyte;Keratinocyte
chr4	160149504	160149704	Enhancer	RP11;RAPGEF2	Keratinocyte;Keratinocyte
chr4	160150315	160150515	Enhancer	RP11;RAPGEF2	Keratinocyte;Keratinocyte
chr4	164252163	164252363	Enhancer	NPY1R	Keratinocyte
chr4	164252906	164253106	Enhancer	NPY1R	Keratinocyte
chr4	166159694	166159894	Enhancer	TMEM192;MSMO1;CPE;HADHAP1	Keratinocyte;Keratinocyte;Keratinocyte;Keratinocyte
chr4	166428051	166428251	Enhancer	KLHL2;TMEM192;GK3P;MSMO1;RP11	Keratinocyte;Keratinocyte;Keratinocyte;Keratinocyte;Keratinocyte
chr4	169226297	169226497	Enhancer	DDX60;PALLD;DDX60L	Keratinocyte;Keratinocyte;Keratinocyte
chr4	169310256	169310456	Enhancer	DDX60	Keratinocyte
chr4	169496267	169496467	Enhancer	DDX60;PALLD;DDX60L;BTF3L4P4;RP11;RPL9P16;CBR4	Keratinocyte;Keratinocyte;Keratinocyte;Keratinocyte;Keratinocyte;Keratinocyte;Keratinocyte
chr4	169725632	169725832	Enhancer	PALLD;DDX60L;RP11;RP11;CBR4	Keratinocyte;Keratinocyte;Keratinocyte;Keratinocyte;Keratinocyte
chr4	169732306	169732506	Enhancer	PALLD;DDX60L;BTF3L4P4;RP11;RPL9P16;RP11	Keratinocyte;Keratinocyte;Keratinocyte;Keratinocyte;Keratinocyte;Keratinocyte
chr4	169733613	169733813	Enhancer	PALLD;DDX60L;BTF3L4P4;RP11;RPL9P16;RP11	Keratinocyte;Keratinocyte;Keratinocyte;Keratinocyte;Keratinocyte;Keratinocyte
chr4	169764927	169765127	Enhancer	PALLD;DDX60L;RPL9P16;RP11	Keratinocyte;Keratinocyte;Keratinocyte;Keratinocyte
chr4	169765105	169765305	Enhancer	PALLD;DDX60L;RPL9P16;RP11	Keratinocyte;Keratinocyte;Keratinocyte;Keratinocyte
chr4	170106368	170106568	Enhancer	RPL6P12;SH3RF1;CLCN3;PTGES3P3	Keratinocyte;Keratinocyte;Keratinocyte;Keratinocyte
chr4	170556087	170556287	Enhancer	SH3RF1;NEK1;CLCN3;C4orf27;PTGES3P3;MFAP3L	Keratinocyte;Keratinocyte;Keratinocyte;Keratinocyte;Keratinocyte;Keratinocyte
chr4	171164510	171164710	Enhancer	PTGES3P3	Keratinocyte
chr4	175255945	175256145	Enhancer	CEP44	Keratinocyte
chr4	183161650	183161850	Enhancer	ODZ3;RP11;AC108142.1	Keratinocyte;Keratinocyte;Keratinocyte
chr4	183167141	183167341	Enhancer	ODZ3;RP11;AC108142.1	Keratinocyte;Keratinocyte;Keratinocyte
chr4	183503450	183503650	Enhancer	DCTD	Keratinocyte
chr4	183657534	183657734	Enhancer	RP11;DCTD;WWC2	Keratinocyte;Keratinocyte;Keratinocyte
chr4	183659541	183659741	Enhancer	RP11	HUVEC
chr4	183735332	183735532	Enhancer	RP11;DCTD;WWC2	Keratinocyte;Keratinocyte;Keratinocyte
chr4	183769087	183769287	Enhancer	RP11;DCTD;WWC2	Keratinocyte;Keratinocyte;Keratinocyte
chr4	183769127	183769327	Enhancer	RP11;DCTD;WWC2	Keratinocyte;Keratinocyte;Keratinocyte
chr4	183784391	183784591	Enhancer	RP11;DCTD	Keratinocyte;Keratinocyte
chr4	184040076	184040276	Enhancer	RP11;FAM92A3;WWC2;WWC2;CDKN2AIP;VTI1BP2	Keratinocyte;Keratinocyte;Keratinocyte;Keratinocyte;Keratinocyte;Keratinocyte
chr4	184121700	184121900	Enhancer	DCTD;WWC2;CDKN2AIP;VTI1BP2;ING2	Keratinocyte;Keratinocyte;Keratinocyte;Keratinocyte;Keratinocyte
chr4	184275097	184275297	Enhancer	CLDN22;RWDD4;TRAPPC11	Keratinocyte;Keratinocyte;Keratinocyte
chr4	184908410	184908610	Enhancer	RWDD4;TRAPPC11	Keratinocyte;Keratinocyte
chr4	184908482	184908682	Enhancer	RWDD4;TRAPPC11	Keratinocyte;Keratinocyte
chr4	184908548	184908748	Enhancer	RWDD4;TRAPPC11	Keratinocyte;Keratinocyte
chr4	184908639	184908839	Enhancer	RWDD4;TRAPPC11	Keratinocyte;Keratinocyte
chr4	184908694	184908894	Enhancer	RWDD4;TRAPPC11	Keratinocyte;Keratinocyte
chr4	184908784	184908984	Enhancer	RWDD4;TRAPPC11	Keratinocyte;Keratinocyte
chr4	184908918	184909118	Enhancer	RWDD4;TRAPPC11	Keratinocyte;Keratinocyte
chr4	185118214	185118414	Enhancer	RP11;IRF2;CASP3	Keratinocyte;Keratinocyte;Keratinocyte
chr4	185249586	185249786	Enhancer	RP11;RP11;IRF2	Keratinocyte;Keratinocyte;Keratinocyte
chr4	185609750	185609950	Enhancer	RP11;CASP3;CCDC111;MLF1IP;ACSL1;SLC25A4	Keratinocyte;Keratinocyte;Keratinocyte;Keratinocyte;Keratinocyte;Keratinocyte
chr4	185616385	185616585	Enhancer	RP11;CASP3;CCDC111;MLF1IP;ACSL1;RP11	Keratinocyte;Keratinocyte;Keratinocyte;Keratinocyte;Keratinocyte;Keratinocyte
chr4	185725141	185725341	Enhancer	CASP3;CCDC111;MLF1IP;ACSL1;RP11	Keratinocyte;Keratinocyte;Keratinocyte;Keratinocyte;Keratinocyte
chr4	185744231	185744431	Enhancer	RP11;RP11;CASP3;CCDC111;MLF1IP;ACSL1;RP11;SLC25A4;KIAA1430	Keratinocyte;Keratinocyte;Keratinocyte;Keratinocyte;Keratinocyte;Keratinocyte;Keratinocyte;Keratinocyte;Keratinocyte
chr4	185890189	185890389	Enhancer	CASP3;CCDC111;KIAA1430	Keratinocyte;Keratinocyte;Keratinocyte
chr4	186122908	186123108	Enhancer	ACSL1;SLC25A4;SNX25;KIAA1430	Keratinocyte;Keratinocyte;Keratinocyte;Keratinocyte
chr5	454042	454242	Enhancer	EXOC3;CTD;CTD;SLC9A3;CTD;C5orf55	Keratinocyte;Keratinocyte;Keratinocyte;Keratinocyte;Keratinocyte;Keratinocyte
chr5	454082	454282	Enhancer	EXOC3;CTD;CTD;SLC9A3;CTD;C5orf55	Keratinocyte;Keratinocyte;Keratinocyte;Keratinocyte;Keratinocyte;Keratinocyte
chr5	454109	454309	Enhancer	EXOC3;CTD;CTD;SLC9A3;CTD;C5orf55	Keratinocyte;Keratinocyte;Keratinocyte;Keratinocyte;Keratinocyte;Keratinocyte
chr5	458598	458798	Enhancer	EXOC3;CTD;CTD;C5orf55	Keratinocyte;Keratinocyte;Keratinocyte;Keratinocyte
chr5	465565	465765	Enhancer	PDCD6;EXOC3;CTD;CTD;AHRR;CTD;C5orf55	Keratinocyte;Keratinocyte;Keratinocyte;Keratinocyte;Keratinocyte;Keratinocyte;Keratinocyte
chr5	912333	912533	Enhancer	ZDHHC11;TRIP13;BRD9;CTD;CTD	HUVEC;HUVEC;HUVEC;HUVEC;HUVEC
chr5	912499	912699	Enhancer	ZDHHC11;TRIP13;BRD9;CTD;CTD	HUVEC;HUVEC;HUVEC;HUVEC;HUVEC
chr5	912721	912921	Enhancer	ZDHHC11;TRIP13;BRD9;CTD;CTD	HUVEC;HUVEC;HUVEC;HUVEC;HUVEC
chr5	912760	912960	Enhancer	ZDHHC11;TRIP13;BRD9;CTD;CTD	HUVEC;HUVEC;HUVEC;HUVEC;HUVEC
chr5	913011	913211	Enhancer	ZDHHC11;TRIP13;BRD9;CTD;CTD	HUVEC;HUVEC;HUVEC;HUVEC;HUVEC
chr5	1326307	1326507	Enhancer	CLPTM1L;LPCAT1;SDHAP3;CTD;RP11	Keratinocyte;Keratinocyte;Keratinocyte;Keratinocyte;Keratinocyte
chr5	1329044	1329244	Enhancer	CLPTM1L;LPCAT1;SDHAP3;CTD;RP11	Keratinocyte;Keratinocyte;Keratinocyte;Keratinocyte;Keratinocyte
chr5	1331438	1331638	Enhancer	CLPTM1L;RP11	Keratinocyte;Keratinocyte
chr5	1948775	1948975	Enhancer	SDHAP3;CTD;RP11;MRPL36;NDUFS6;IRX4;RP11;RP11	Keratinocyte;Keratinocyte;Keratinocyte;Keratinocyte;Keratinocyte;Keratinocyte;Keratinocyte;Keratinocyte
chr5	1948895	1949095	Enhancer	SDHAP3;CTD;RP11;MRPL36;NDUFS6;IRX4;RP11;RP11	Keratinocyte;Keratinocyte;Keratinocyte;Keratinocyte;Keratinocyte;Keratinocyte;Keratinocyte;Keratinocyte
chr5	1949380	1949580	Enhancer	SDHAP3;CTD;RP11;MRPL36;NDUFS6;IRX4;RP11;RP11	Keratinocyte;Keratinocyte;Keratinocyte;Keratinocyte;Keratinocyte;Keratinocyte;Keratinocyte;Keratinocyte
chr5	9927593	9927793	Enhancer	2006-03-01	Keratinocyte
chr5	10289516	10289716	Enhancer	CTD;FAM173B;CCT5;CMBL;RP11;RP11	Keratinocyte;Keratinocyte;Keratinocyte;Keratinocyte;Keratinocyte;Keratinocyte
chr5	10366824	10367024	Enhancer	CTD;FAM173B;CCT5;CMBL;CTD;MARCH6;RP11	Keratinocyte;Keratinocyte;Keratinocyte;Keratinocyte;Keratinocyte;Keratinocyte;Keratinocyte
chr5	13991319	13991519	Enhancer	CCT6P2	Keratinocyte
chr5	14182936	14183136	Enhancer	DNAH5;TRIO;CCT6P2;FAM105B;RBBP4P1	Keratinocyte;Keratinocyte;Keratinocyte;Keratinocyte;Keratinocyte
chr5	14182965	14183165	Enhancer	DNAH5;TRIO;CCT6P2;FAM105B;RBBP4P1	Keratinocyte;Keratinocyte;Keratinocyte;Keratinocyte;Keratinocyte
chr5	14299010	14299210	Enhancer	CTC;DNAH5;TRIO;CCT6P2;FAM105B	Keratinocyte;Keratinocyte;Keratinocyte;Keratinocyte;Keratinocyte
chr5	14305401	14305601	Enhancer	DNAH5;TRIO	Keratinocyte;Keratinocyte
chr5	14959630	14959830	Enhancer	CCT6P2;FAM105B;RBBP4P1	Keratinocyte;Keratinocyte;Keratinocyte
chr5	16569076	16569276	Enhancer	CTB;MYO10	Keratinocyte;Keratinocyte
chr5	16674794	16674994	Enhancer	CTB	Keratinocyte
chr5	16809343	16809543	Enhancer	ZNF622;RP11;FAM134B;CTB;MYO10;BASP1;FTH1P10	Keratinocyte;Keratinocyte;Keratinocyte;Keratinocyte;Keratinocyte;Keratinocyte;Keratinocyte
chr5	17057346	17057546	Enhancer	BASP1;CTD;7SK;CTD;FTH1P10	Keratinocyte;Keratinocyte;Keratinocyte;Keratinocyte;Keratinocyte
chr5	17238467	17238667	Enhancer	CTB;MYO10;AC091878.1;BASP1;CTD;7SK;CTD;FTH1P10	Keratinocyte;Keratinocyte;Keratinocyte;Keratinocyte;Keratinocyte;Keratinocyte;Keratinocyte;Keratinocyte
chr5	17249400	17249600	Enhancer	CTB;MYO10;AC091878.1;BASP1;CTD;7SK;CTD;FTH1P10	Keratinocyte;Keratinocyte;Keratinocyte;Keratinocyte;Keratinocyte;Keratinocyte;Keratinocyte;Keratinocyte
chr5	17406766	17406966	Enhancer	CTB;AC091878.1;BASP1;7SK	Keratinocyte;Keratinocyte;Keratinocyte;Keratinocyte
chr5	17805792	17805992	Enhancer	RP11	Keratinocyte
chr5	31408478	31408678	Enhancer	C5orf22;RP11	Keratinocyte;Keratinocyte
chr5	31409264	31409464	Enhancer	C5orf22	Keratinocyte
chr5	31916340	31916540	Enhancer	CTD;CTD;CTD;CTD;CTD;GOLPH3;CTD;CTD;SUB1	Keratinocyte;Keratinocyte;Keratinocyte;Keratinocyte;Keratinocyte;Keratinocyte;Keratinocyte;Keratinocyte;Keratinocyte
chr5	31943288	31943488	Enhancer	DROSHA;C5orf22;PDZD2;RP11;CTD;CTD;CTD;CTD;CTD;GOLPH3;CTD;CTD;SUB1	Keratinocyte;Keratinocyte;Keratinocyte;Keratinocyte;Keratinocyte;Keratinocyte;Keratinocyte;Keratinocyte;Keratinocyte;Keratinocyte;Keratinocyte;Keratinocyte;Keratinocyte
chr5	31944870	31945070	Enhancer	DROSHA;C5orf22;PDZD2;RP11;CTD;CTD;CTD;CTD;CTD;GOLPH3;CTD;SUB1	Keratinocyte;Keratinocyte;Keratinocyte;Keratinocyte;Keratinocyte;Keratinocyte;Keratinocyte;Keratinocyte;Keratinocyte;Keratinocyte;Keratinocyte;Keratinocyte
chr5	31948331	31948531	Enhancer	PDZD2;RP11;CTD;CTD;CTD;CTD;CTD;GOLPH3	Keratinocyte;Keratinocyte;Keratinocyte;Keratinocyte;Keratinocyte;Keratinocyte;Keratinocyte;Keratinocyte
chr5	31962646	31962846	Enhancer	PDZD2;RP11;CTD;CTD;CTD;CTD;CTD;GOLPH3	Keratinocyte;Keratinocyte;Keratinocyte;Keratinocyte;Keratinocyte;Keratinocyte;Keratinocyte;Keratinocyte
chr5	32508352	32508552	Enhancer	CTD;CTD;GOLPH3;CTD;CTD;SUB1	Keratinocyte;Keratinocyte;Keratinocyte;Keratinocyte;Keratinocyte;Keratinocyte
chr5	33343803	33344003	Enhancer	RP11	Keratinocyte
chr5	34006794	34006994	Enhancer	RP11;AMACR;SLC45A2	HUVEC,Keratinocyte;HUVEC,Keratinocyte;Keratinocyte
chr5	34530334	34530534	Enhancer	CTD;BRIX1;RAD1	Keratinocyte;Keratinocyte;Keratinocyte
chr5	34699495	34699695	Enhancer	RAI14;CTD	Keratinocyte;Keratinocyte
chr5	36239573	36239773	Enhancer	CTD;NADKD1;SLC1A3	Keratinocyte;Keratinocyte;Keratinocyte
chr5	36239718	36239918	Enhancer	CTD;NADKD1;SLC1A3	Keratinocyte;Keratinocyte;Keratinocyte
chr5	37927126	37927326	Enhancer	CTD	Keratinocyte
chr5	41794704	41794904	Enhancer	OXCT1;OXCT1;FBXO4;CTD	HUVEC,Keratinocyte;HUVEC,Keratinocyte;Keratinocyte;Keratinocyte
chr5	43362932	43363132	Enhancer	CTD;CCL28;C5orf28;RP11;EEF1A1P19;C5orf34;PAIP1;CTD;NNT;RP11;CTD	Keratinocyte;Keratinocyte;Keratinocyte;Keratinocyte;Keratinocyte;Keratinocyte;Keratinocyte;Keratinocyte;Keratinocyte;Keratinocyte;Keratinocyte
chr5	43426451	43426651	Enhancer	ZNF131;AC114947.1;RP11;CTD;CCL28;C5orf28;RP11;EEF1A1P19;RP11;C5orf34;RP11;PAIP1;CTD;NNT;RP11;CTD	Keratinocyte;Keratinocyte;Keratinocyte;Keratinocyte;Keratinocyte;Keratinocyte;Keratinocyte;Keratinocyte;Keratinocyte;Keratinocyte;Keratinocyte;Keratinocyte;Keratinocyte;Keratinocyte;Keratinocyte;Keratinocyte
chr5	52615204	52615404	Enhancer	ITGA2;NDUFS4	Keratinocyte;Keratinocyte
chr5	52639075	52639275	Enhancer	ITGA2	Keratinocyte
chr5	52658454	52658654	Enhancer	ITGA2;RP11	Keratinocyte;Keratinocyte
chr5	53605092	53605292	Enhancer	ARL15;HSPB3;RP11	Keratinocyte;Keratinocyte;Keratinocyte
chr5	53656187	53656387	Enhancer	RP11	Keratinocyte
chr5	53752892	53753092	Enhancer	HSPB3;RP11	Keratinocyte;Keratinocyte
chr5	53753095	53753295	Enhancer	HSPB3;RP11	Keratinocyte;Keratinocyte
chr5	54514936	54515136	Enhancer	GPX8;RP11	Keratinocyte;Keratinocyte
chr5	55737111	55737311	Enhancer	AC022431.1;AC022431.3;MAP3K1	Keratinocyte;Keratinocyte;Keratinocyte
chr5	55737423	55737623	Enhancer	AC022431.1;AC022431.3;MAP3K1	Keratinocyte;Keratinocyte;Keratinocyte
chr5	55822917	55823117	Enhancer	RPL17P22;RP11;PSMC1P4;HMGN1P17;AC022431.1;AC022431.3	Keratinocyte;Keratinocyte;Keratinocyte;Keratinocyte;Keratinocyte;Keratinocyte
chr5	55840126	55840326	Enhancer	RPL17P22;RP11;HMGN1P17;AC022431.1	Keratinocyte;Keratinocyte;Keratinocyte;Keratinocyte
chr5	55881505	55881705	Enhancer	RP11;HMGN1P17;AC022431.1;MIER3	Keratinocyte;Keratinocyte;Keratinocyte;Keratinocyte
chr5	57112974	57113174	Enhancer	PLK2	Keratinocyte
chr5	57120779	57120979	Enhancer	PLK2	Keratinocyte
chr5	57159012	57159212	Enhancer	PLK2	Keratinocyte
chr5	57610510	57610710	Enhancer	PLK2;RP11	Keratinocyte;Keratinocyte
chr5	57752022	57752222	Enhancer	PLK2;RAB3C	Keratinocyte;Keratinocyte
chr5	60600465	60600665	Enhancer	NDUFAF2;ZSWIM6;RP11;RP11;RPL3P6	Keratinocyte;Keratinocyte;Keratinocyte;Keratinocyte;Keratinocyte
chr5	60600989	60601189	Enhancer	NDUFAF2;ZSWIM6;RP11;RP11;RPL3P6	Keratinocyte;Keratinocyte;Keratinocyte;Keratinocyte;Keratinocyte
chr5	61563966	61564166	Enhancer	KIF2A;DIMT1;IPO11	Keratinocyte;Keratinocyte;Keratinocyte
chr5	65105778	65105978	Enhancer	ERBB2IP	Keratinocyte
chr5	65106058	65106258	Enhancer	ERBB2IP	Keratinocyte
chr5	65894742	65894942	Enhancer	RP11;MAST4;RP11;MAST4	Keratinocyte;Keratinocyte;Keratinocyte;Keratinocyte
chr5	67111988	67112188	Enhancer	EEF1B2P2;PIK3R1	Keratinocyte;Keratinocyte
chr5	67740734	67740934	Enhancer	EEF1B2P2	Keratinocyte
chr5	67850857	67851057	Enhancer	EEF1B2P2;PIK3R1	Keratinocyte;Keratinocyte
chr5	68711419	68711619	Enhancer	SLC30A5;CCNB1;CENPH;MRPS36;CDK7;CFL1P5;CCDC125;CHCHD2P2;RAD17;TAF9;MARVELD2	Keratinocyte;Keratinocyte;Keratinocyte;Keratinocyte;Keratinocyte;Keratinocyte;Keratinocyte;Keratinocyte;Keratinocyte;Keratinocyte;Keratinocyte
chr5	68711540	68711740	Enhancer	SLC30A5;CCNB1;CENPH;MRPS36;CDK7;CFL1P5;CCDC125;CHCHD2P2;RAD17;TAF9;MARVELD2	Keratinocyte;Keratinocyte;Keratinocyte;Keratinocyte;Keratinocyte;Keratinocyte;Keratinocyte;Keratinocyte;Keratinocyte;Keratinocyte;Keratinocyte
chr5	71202986	71203186	Enhancer	PTCD2;MRPS27	Keratinocyte;Keratinocyte
chr5	71475011	71475211	Enhancer	MAP1B;AC026406.1;PTCD2;MRPS27	Keratinocyte;Keratinocyte;Keratinocyte;Keratinocyte
chr5	71475256	71475456	Enhancer	MAP1B;AC026406.1;PTCD2;MRPS27	Keratinocyte;Keratinocyte;Keratinocyte;Keratinocyte
chr5	71475366	71475566	Enhancer	MAP1B;AC026406.1;PTCD2;MRPS27	Keratinocyte;Keratinocyte;Keratinocyte;Keratinocyte
chr5	71658469	71658669	Enhancer	MAP1B;AC026406.1;PTCD2;MRPS27;RPL7P22	Keratinocyte;Keratinocyte;Keratinocyte;Keratinocyte;Keratinocyte
chr5	71673885	71674085	Enhancer	MAP1B;AC026406.1;PTCD2;MRPS27;RPL7P22	Keratinocyte;Keratinocyte;Keratinocyte;Keratinocyte;Keratinocyte
chr5	71674567	71674767	Enhancer	MAP1B;AC026406.1;PTCD2;MRPS27;RPL7P22	Keratinocyte;Keratinocyte;Keratinocyte;Keratinocyte;Keratinocyte
chr5	71688410	71688610	Enhancer	MAP1B;AC026406.1;PTCD2;MRPS27;RPL7P22	Keratinocyte;Keratinocyte;Keratinocyte;Keratinocyte;Keratinocyte
chr5	72901498	72901698	Enhancer	RP11;UTP15;ANKRA2;CTC;CTD	Keratinocyte;Keratinocyte;Keratinocyte;Keratinocyte;Keratinocyte
chr5	72901632	72901832	Enhancer	RP11;UTP15;ANKRA2;CTC;CTD	Keratinocyte;Keratinocyte;Keratinocyte;Keratinocyte;Keratinocyte
chr5	72911052	72911252	Enhancer	RP11;BTF3;RP11;CTC;CTD	Keratinocyte;Keratinocyte;Keratinocyte;Keratinocyte;Keratinocyte
chr5	72970195	72970395	Enhancer	RP11;RP11;RP11;BTF3;AC099522.1;UTP15;ANKRA2;RP11;CTC;CTD	Keratinocyte;Keratinocyte;Keratinocyte;Keratinocyte;Keratinocyte;Keratinocyte;Keratinocyte;Keratinocyte;Keratinocyte;Keratinocyte
chr5	73122172	73122372	Enhancer	RP11;BTF3;AC099522.1;UTP15;ANKRA2;RP11;CTC;CTD	Keratinocyte;Keratinocyte;Keratinocyte;Keratinocyte;Keratinocyte;Keratinocyte;Keratinocyte;Keratinocyte
chr5	74161087	74161287	Enhancer	HEXB;ENC1;NSA2;GFM2;FAM169A;CTD;SUMO2P5	Keratinocyte;Keratinocyte;Keratinocyte;Keratinocyte;Keratinocyte;Keratinocyte;Keratinocyte
chr5	74387613	74387813	Enhancer	NSA2;GFM2;CTD;RP11;HMGCR	Keratinocyte;Keratinocyte;Keratinocyte;Keratinocyte;Keratinocyte
chr5	74753573	74753773	Enhancer	HMGCR;POLK;COL4A3BP;POC5	Keratinocyte;Keratinocyte;Keratinocyte;Keratinocyte
chr5	74908070	74908270	Enhancer	SUMO2P5;HMGCR;POLK;COL4A3BP;CTC;ANKDD1B;RP11	Keratinocyte;Keratinocyte;Keratinocyte;Keratinocyte;Keratinocyte;Keratinocyte;Keratinocyte
chr5	75500507	75500707	Enhancer	RP11	Keratinocyte
chr5	76115988	76116188	Enhancer	F2RL2;F2R;CTD;F2RL1	Keratinocyte;Keratinocyte;Keratinocyte;Keratinocyte
chr5	76326908	76327108	Enhancer	F2R;F2RL1;AGGF1;CTC;ZBED3	Keratinocyte;Keratinocyte;Keratinocyte;Keratinocyte;Keratinocyte
chr5	78986060	78986260	Enhancer	CMYA5	Keratinocyte
chr5	79762863	79763063	Enhancer	CTC;ZFYVE16;FAM151B;CTD;CTD;CTD	Keratinocyte;Keratinocyte;Keratinocyte;Keratinocyte;Keratinocyte;Keratinocyte
chr5	80467735	80467935	Enhancer	ZCCHC9	Keratinocyte
chr5	81518440	81518640	Enhancer	SHFM1P1;ATG10;RPS23;ATP6AP1L	Keratinocyte;Keratinocyte;Keratinocyte;Keratinocyte
chr5	86525780	86525980	Enhancer	CTD;CCNH	Keratinocyte;Keratinocyte
chr5	89823030	89823230	Enhancer	POLR3G;MBLAC2;LYSMD3	Keratinocyte;Keratinocyte;Keratinocyte
chr5	95215663	95215863	Enhancer	GLRX;CTD;ELL2;FABP5P5;RP11;RP11;PCSK1;CAST;CTC;ERAP1	Keratinocyte;Keratinocyte;Keratinocyte;Keratinocyte;Keratinocyte;Keratinocyte;Keratinocyte;Keratinocyte;Keratinocyte;Keratinocyte
chr5	95217905	95218105	Enhancer	TTC37;ARSK;CTD;HSPD1P11;GLRX;AC008592.3;CTD;ELL2;FABP5P5;RP11;RP11;PCSK1;CAST;CTC;ERAP1	Keratinocyte;Keratinocyte;Keratinocyte;Keratinocyte;Keratinocyte;Keratinocyte;Keratinocyte;Keratinocyte;Keratinocyte;Keratinocyte;Keratinocyte;Keratinocyte;Keratinocyte;Keratinocyte;Keratinocyte
chr5	95260520	95260720	Enhancer	TTC37;ARSK;RFESD;RHOBTB3;CTD;HSPD1P11;GLRX;AC008592.3;C5orf27;CTD;ELL2;FABP5P5;RP11;RP11;PCSK1;CAST;CTC;ERAP1	Keratinocyte;Keratinocyte;Keratinocyte;Keratinocyte;Keratinocyte;Keratinocyte;Keratinocyte;Keratinocyte;Keratinocyte;Keratinocyte;Keratinocyte;Keratinocyte;Keratinocyte;Keratinocyte;Keratinocyte;Keratinocyte;Keratinocyte;Keratinocyte
chr5	95264579	95264779	Enhancer	CTD;TTC37;ARSK;GPR150;RFESD;RHOBTB3;CTD;HSPD1P11;GLRX;AC008592.3;C5orf27;CTD;ELL2;FABP5P5;RP11;RP11;PCSK1;CAST;CTC;ERAP1	Keratinocyte;Keratinocyte;Keratinocyte;Keratinocyte;Keratinocyte;Keratinocyte;Keratinocyte;Keratinocyte;Keratinocyte;Keratinocyte;Keratinocyte;Keratinocyte;Keratinocyte;Keratinocyte;Keratinocyte;Keratinocyte;Keratinocyte;Keratinocyte;Keratinocyte;Keratinocyte
chr5	95372872	95373072	Enhancer	CTD;RFESD;SPATA9;RHOBTB3;CTD;GLRX;AC008592.3;C5orf27;CTD;ELL2;FABP5P5;RP11;RP11;CAST;CTC;ERAP1	Keratinocyte;Keratinocyte;Keratinocyte;Keratinocyte;Keratinocyte;Keratinocyte;Keratinocyte;Keratinocyte;Keratinocyte;Keratinocyte;Keratinocyte;Keratinocyte;Keratinocyte;Keratinocyte;Keratinocyte;Keratinocyte
chr5	95429229	95429429	Enhancer	CTD;RFESD;RHOBTB3;CTD;GLRX;AC008592.3;CTD;ELL2;FABP5P5;RP11;RP11;RP11;PCSK1;CAST;ERAP1	Keratinocyte;Keratinocyte;Keratinocyte;Keratinocyte;Keratinocyte;Keratinocyte;Keratinocyte;Keratinocyte;Keratinocyte;Keratinocyte;Keratinocyte;Keratinocyte;Keratinocyte;Keratinocyte;Keratinocyte
chr5	95480068	95480268	Enhancer	RFESD;SPATA9;RHOBTB3;CTD;GLRX;AC008592.3;CTD;ELL2;FABP5P5;RP11;RP11;RP11;PCSK1;CAST	Keratinocyte;Keratinocyte;Keratinocyte;Keratinocyte;Keratinocyte;Keratinocyte;Keratinocyte;Keratinocyte;Keratinocyte;Keratinocyte;Keratinocyte;Keratinocyte;Keratinocyte;Keratinocyte
chr5	95485398	95485598	Enhancer	ARSK;RFESD;RHOBTB3;CTD;GLRX;AC008592.3;CTD;ELL2;FABP5P5;RP11;RP11;RP11;CAST;ERAP1	Keratinocyte;Keratinocyte;Keratinocyte;Keratinocyte;Keratinocyte;Keratinocyte;Keratinocyte;Keratinocyte;Keratinocyte;Keratinocyte;Keratinocyte;Keratinocyte;Keratinocyte;Keratinocyte
chr5	95582821	95583021	Enhancer	RFESD;RHOBTB3;CTD;GLRX;AC008592.3;C5orf27;CTD;ELL2;RP11;RP11;PCSK1;CAST;ERAP2	Keratinocyte;Keratinocyte;Keratinocyte;Keratinocyte;Keratinocyte;Keratinocyte;Keratinocyte;Keratinocyte;Keratinocyte;Keratinocyte;Keratinocyte;Keratinocyte;Keratinocyte
chr5	96039770	96039970	Enhancer	CAST;CTC;CTD;ERAP1;ERAP2;LNPEP;CTD;AC008850.3;AC008865.1;SETP22;CTD	Keratinocyte;Keratinocyte;Keratinocyte;Keratinocyte;Keratinocyte;Keratinocyte;Keratinocyte;Keratinocyte;Keratinocyte;Keratinocyte;Keratinocyte
chr5	96042528	96042728	Enhancer	RP11;CAST;CTC;CTD;ERAP1;ERAP2;LNPEP;CTD;AC008850.3;AC008865.1;SETP22;CTD	Keratinocyte;Keratinocyte;Keratinocyte;Keratinocyte;Keratinocyte;Keratinocyte;Keratinocyte;Keratinocyte;Keratinocyte;Keratinocyte;Keratinocyte;Keratinocyte
chr5	96044983	96045183	Enhancer	RP11;CAST;CTC;CTD;ERAP1;ERAP2;LNPEP;CTD;AC008850.3;AC008865.1;SETP22;CTD	Keratinocyte;Keratinocyte;Keratinocyte;Keratinocyte;Keratinocyte;Keratinocyte;Keratinocyte;Keratinocyte;Keratinocyte;Keratinocyte;Keratinocyte;Keratinocyte
chr5	96070816	96071016	Enhancer	GLRX;AC008592.3;RP11;PCSK1;RP11;CAST;CTC;CTD;ERAP1;ERAP2;LNPEP;CTD;AC008850.3;AC008865.1;SETP22;RIOK2	Keratinocyte;Keratinocyte;Keratinocyte;Keratinocyte;Keratinocyte;Keratinocyte;Keratinocyte;Keratinocyte;Keratinocyte;Keratinocyte;Keratinocyte;Keratinocyte;Keratinocyte;Keratinocyte;Keratinocyte;Keratinocyte
chr5	96117288	96117488	Enhancer	GLRX;AC008592.3;RP11;PCSK1;RP11;CAST;CTC;CTD;ERAP1;LNPEP;AC008865.1	Keratinocyte;Keratinocyte;Keratinocyte;Keratinocyte;Keratinocyte;Keratinocyte;Keratinocyte;Keratinocyte;Keratinocyte;Keratinocyte;Keratinocyte
chr5	96141621	96141821	Enhancer	GLRX;AC008592.3;PCSK1;RP11;CAST;CTC;CTD;ERAP1;ERAP2;LNPEP;CTD;AC008850.3;AC008865.1;RIOK2	Keratinocyte;Keratinocyte;Keratinocyte;Keratinocyte;Keratinocyte;Keratinocyte;Keratinocyte;Keratinocyte;Keratinocyte;Keratinocyte;Keratinocyte;Keratinocyte;Keratinocyte;Keratinocyte
chr5	98108098	98108298	Enhancer	CTC;RGMB;CTC	HUVEC;HUVEC;HUVEC
chr5	106762074	106762274	Enhancer	EFNA5	Keratinocyte
chr5	106801734	106801934	Enhancer	EFNA5;RP11	Keratinocyte;Keratinocyte
chr5	106801845	106802045	Enhancer	EFNA5;RP11	Keratinocyte;Keratinocyte
chr5	106802178	106802378	Enhancer	EFNA5;RP11	Keratinocyte;Keratinocyte
chr5	106912685	106912885	Enhancer	RP11	Keratinocyte
chr5	107991698	107991898	Enhancer	RP11;CTC;CTD;RP11;CTC	Keratinocyte;Keratinocyte;Keratinocyte;Keratinocyte;Keratinocyte
chr5	108786165	108786365	Enhancer	7SK	Keratinocyte
chr5	110602094	110602294	Enhancer	CTD;CAMK4;STARD4	Keratinocyte;Keratinocyte;Keratinocyte
chr5	110789828	110790028	Enhancer	TSLP;WDR36;CTC;STARD4	Keratinocyte;Keratinocyte;Keratinocyte;Keratinocyte
chr5	111519128	111519328	Enhancer	EPB41L4A;SNORA13;CTC;RP11	Keratinocyte;Keratinocyte;Keratinocyte;Keratinocyte
chr5	111564943	111565143	Enhancer	EPB41L4A;SNORA13;CTC;RP11	Keratinocyte;Keratinocyte;Keratinocyte;Keratinocyte
chr5	111985663	111985863	Enhancer	CBX3P3;SRP19;ZRSR1;REEP5;DCP2	Keratinocyte;Keratinocyte;Keratinocyte;Keratinocyte;Keratinocyte
chr5	112044732	112044932	Enhancer	APC;CBX3P3;XBP1P1;ZRSR1	Keratinocyte;Keratinocyte;Keratinocyte;Keratinocyte
chr5	112393306	112393506	Enhancer	APC;SRP19;XBP1P1;ZRSR1;REEP5;DCP2;CTD	Keratinocyte;Keratinocyte;Keratinocyte;Keratinocyte;Keratinocyte;Keratinocyte;Keratinocyte
chr5	112477053	112477253	Enhancer	SRP19;ZRSR1;REEP5;DCP2;MCC	Keratinocyte;Keratinocyte;Keratinocyte;Keratinocyte;Keratinocyte
chr5	112497572	112497772	Enhancer	SRP19;ZRSR1;REEP5;DCP2;MCC;YTHDC2	Keratinocyte;Keratinocyte;Keratinocyte;Keratinocyte;Keratinocyte;Keratinocyte
chr5	112568108	112568308	Enhancer	SRP19;ZRSR1;REEP5;DCP2;CTD;MCC;YTHDC2	Keratinocyte;Keratinocyte;Keratinocyte;Keratinocyte;Keratinocyte;Keratinocyte;Keratinocyte
chr5	112599767	112599967	Enhancer	SRP19;ZRSR1;REEP5;DCP2;CTD;TSSK1B;MCC;YTHDC2	Keratinocyte;Keratinocyte;Keratinocyte;Keratinocyte;Keratinocyte;Keratinocyte;Keratinocyte;Keratinocyte
chr5	112602998	112603198	Enhancer	SRP19;ZRSR1;REEP5;DCP2;CTD;TSSK1B;YTHDC2	Keratinocyte;Keratinocyte;Keratinocyte;Keratinocyte;Keratinocyte;Keratinocyte;Keratinocyte
chr5	112831202	112831402	Enhancer	CTD;MCC	HUVEC;HUVEC
chr5	114715898	114716098	Enhancer	CTNNAP1;TMED7;CTC	Keratinocyte;Keratinocyte;Keratinocyte
chr5	115697270	115697470	Enhancer	CTD;COMMD10	Keratinocyte;Keratinocyte
chr5	115697596	115697796	Enhancer	CTD;COMMD10	Keratinocyte;Keratinocyte
chr5	118722707	118722907	Enhancer	PTMAP2;CTB;DMXL1;LAMTOR3P2;TNFAIP8;HSD17B4;CTD;CTD;CTC	Keratinocyte;Keratinocyte;Keratinocyte;Keratinocyte;Keratinocyte;Keratinocyte;Keratinocyte;Keratinocyte;Keratinocyte
chr5	121499627	121499827	Enhancer	SRFBP1;ZNF474;CTC	Keratinocyte;Keratinocyte;Keratinocyte
chr5	123737713	123737913	Enhancer	RP11	Keratinocyte
chr5	123738029	123738229	Enhancer	RP11	Keratinocyte
chr5	125773607	125773807	Enhancer	GRAMD3;RP11;ALDH7A1;PHAX;RP11;C5orf48;RP11;LMNB1	Keratinocyte;Keratinocyte;Keratinocyte;Keratinocyte;Keratinocyte;Keratinocyte;Keratinocyte;Keratinocyte
chr5	125782649	125782849	Enhancer	GRAMD3;RP11;ALDH7A1;PHAX;RP11;C5orf48;RP11;LMNB1	Keratinocyte;Keratinocyte;Keratinocyte;Keratinocyte;Keratinocyte;Keratinocyte;Keratinocyte;Keratinocyte
chr5	125806523	125806723	Enhancer	GRAMD3;RP11;ALDH7A1;PHAX;RP11;C5orf48;RP11	Keratinocyte;Keratinocyte;Keratinocyte;Keratinocyte;Keratinocyte;Keratinocyte;Keratinocyte
chr5	125851964	125852164	Enhancer	GRAMD3;RP11;ALDH7A1;PHAX;RP11;C5orf48;RP11;LMNB1	Keratinocyte;Keratinocyte;Keratinocyte;Keratinocyte;Keratinocyte;Keratinocyte;Keratinocyte;Keratinocyte
chr5	125929032	125929232	Enhancer	GRAMD3;RP11;ALDH7A1;PHAX;RP11;RP11	Keratinocyte;Keratinocyte;Keratinocyte;Keratinocyte;Keratinocyte;Keratinocyte
chr5	125929491	125929691	Enhancer	GRAMD3;RP11;ALDH7A1;PHAX;RP11;RP11	Keratinocyte;Keratinocyte;Keratinocyte;Keratinocyte;Keratinocyte;Keratinocyte
chr5	125929917	125930117	Enhancer	GRAMD3;RP11;ALDH7A1;PHAX;RP11;RP11	Keratinocyte;Keratinocyte;Keratinocyte;Keratinocyte;Keratinocyte;Keratinocyte
[truncated: 13,742 more rows]

## Sheet: hyper promoter genes nodule
chr1	854666	854866	Promoter	LOC100130417
chr1	854724	854924	Promoter	LOC100130417
chr1	855444	855644	Promoter	LOC100130417
chr1	858262	858462	Promoter	LOC100130417,SAMD11
chr1	898644	898844	Promoter	NOC2L,PLEKHN1
chr1	918589	918789	Promoter	PERM1
chr1	918596	918796	Promoter	PERM1
chr1	938805	939005	Promoter	HES4
chr1	1009181	1009381	Promoter	RNF223
chr1	1009641	1009841	Promoter	RNF223
chr1	1010109	1010309	Promoter	RNF223
chr1	1010669	1010869	Promoter	RNF223
chr1	1067989	1068189	Promoter	LINC01342
chr1	1098800	1099000	Promoter	MIR200A,MIR200B
chr1	1098892	1099092	Promoter	MIR200A,MIR200B
chr1	1098951	1099151	Promoter	MIR200A,MIR200B
chr1	1099066	1099266	Promoter	MIR200A,MIR200B
chr1	1099483	1099683	Promoter	MIR200A,MIR429,MIR200B
chr1	1099530	1099730	Promoter	MIR200A,MIR429,MIR200B
chr1	1100026	1100226	Promoter	MIR200A,MIR429,MIR200B
chr1	1100393	1100593	Promoter	MIR200A,MIR429,MIR200B
chr1	1142832	1143032	Promoter	TNFRSF18
chr1	1153824	1154024	Promoter	TNFRSF4
chr1	1239159	1239359	Promoter	PUSL1
chr1	1244976	1245176	Promoter	ACAP3
chr1	1245084	1245284	Promoter	ACAP3
chr1	1245608	1245808	Promoter	ACAP3
chr1	1261247	1261447	Promoter	CPSF3L
chr1	1266078	1266278	Promoter	TAS1R3
chr1	1266448	1266648	Promoter	TAS1R3
chr1	1266552	1266752	Promoter	TAS1R3
chr1	1267093	1267293	Promoter	TAS1R3
chr1	1267101	1267301	Promoter	TAS1R3
chr1	1299623	1299823	Promoter	MXRA8
chr1	1299659	1299859	Promoter	MXRA8
chr1	1299761	1299961	Promoter	MXRA8
chr1	1299775	1299975	Promoter	MXRA8
chr1	1311997	1312197	Promoter	AURKAIP1
chr1	1312044	1312244	Promoter	AURKAIP1
chr1	1356752	1356952	Promoter	ANKRD65,TMEM88B
chr1	1356787	1356987	Promoter	ANKRD65,TMEM88B
chr1	1356802	1357002	Promoter	ANKRD65,TMEM88B
chr1	1356821	1357021	Promoter	ANKRD65,TMEM88B
chr1	1356840	1357040	Promoter	ANKRD65,TMEM88B
chr1	1357214	1357414	Promoter	ANKRD65,TMEM88B
chr1	1368287	1368487	Promoter	VWA1
chr1	1368441	1368641	Promoter	VWA1
chr1	1476925	1477125	Promoter	TMEM240
chr1	1536001	1536201	Promoter	C1orf233
chr1	1536296	1536496	Promoter	C1orf233
chr1	1549515	1549715	Promoter	MIB2
chr1	1549599	1549799	Promoter	MIB2
chr1	1562645	1562845	Promoter	MMP23B
chr1	1562667	1562867	Promoter	MMP23B
chr1	1562671	1562871	Promoter	MMP23B
chr1	1562996	1563196	Promoter	MMP23B
chr1	1563400	1563600	Promoter	MMP23B,MMP23A
chr1	1563595	1563795	Promoter	MMP23B,MMP23A
chr1	1690135	1690335	Promoter	NADK
chr1	1690160	1690360	Promoter	NADK
chr1	1690289	1690489	Promoter	NADK
chr1	1690510	1690710	Promoter	NADK
chr1	1714939	1715139	Promoter	NADK
chr1	1841214	1841414	Promoter	CALML6
chr1	1845998	1846198	Promoter	CALML6
chr1	1846054	1846254	Promoter	CALML6
chr1	2130395	2130595	Promoter	C1orf86
chr1	2139248	2139448	Promoter	C1orf86
chr1	2140112	2140312	Promoter	C1orf86
chr1	2142434	2142634	Promoter	C1orf86
chr1	2144773	2144973	Promoter	C1orf86
chr1	2145158	2145358	Promoter	C1orf86
chr1	2145176	2145376	Promoter	C1orf86
chr1	2145537	2145737	Promoter	C1orf86
chr1	2145553	2145753	Promoter	C1orf86
chr1	2145555	2145755	Promoter	C1orf86
chr1	2146136	2146336	Promoter	C1orf86
chr1	2284079	2284279	Promoter	LOC100129534
chr1	2284430	2284630	Promoter	LOC100129534
chr1	2321777	2321977	Promoter	RER1
chr1	2345276	2345476	Promoter	PEX10
chr1	2459124	2459324	Promoter	PANK4
chr1	2463773	2463973	Promoter	HES5
chr1	2464896	2465096	Promoter	HES5
chr1	2466175	2466375	Promoter	HES5
chr1	3606792	3606992	Promoter	TP73
chr1	3606997	3607197	Promoter	TP73
chr1	3607016	3607216	Promoter	TP73
chr1	3607043	3607243	Promoter	TP73
chr1	3607325	3607525	Promoter	TP73
chr1	3662864	3663064	Promoter	TP73-AS1
chr1	3663003	3663203	Promoter	TP73-AS1
chr1	3664422	3664622	Promoter	TP73-AS1,CCDC27
chr1	3664486	3664686	Promoter	TP73-AS1,CCDC27
chr1	3774727	3774927	Promoter	CEP104
chr1	3774758	3774958	Promoter	CEP104
chr1	3774978	3775178	Promoter	CEP104
chr1	6048838	6049038	Promoter	KCNAB2
chr1	6085772	6085972	Promoter	KCNAB2
chr1	6105844	6106044	Promoter	KCNAB2
chr1	6105946	6106146	Promoter	KCNAB2
chr1	6106258	6106458	Promoter	KCNAB2
chr1	6106439	6106639	Promoter	KCNAB2
chr1	6421869	6422069	Promoter	ACOT7
chr1	6445532	6445732	Promoter	ACOT7
chr1	6445793	6445993	Promoter	ACOT7
chr1	6445801	6446001	Promoter	ACOT7
chr1	6445809	6446009	Promoter	ACOT7
chr1	6445816	6446016	Promoter	ACOT7
chr1	6445995	6446195	Promoter	ACOT7
chr1	6446116	6446316	Promoter	ACOT7
chr1	6446134	6446334	Promoter	ACOT7
chr1	6446687	6446887	Promoter	ACOT7
chr1	6446695	6446895	Promoter	ACOT7
chr1	6548391	6548591	Promoter	PLEKHG5
chr1	6552040	6552240	Promoter	PLEKHG5
chr1	6552287	6552487	Promoter	PLEKHG5
chr1	6552303	6552503	Promoter	PLEKHG5
chr1	6557985	6558185	Promoter	PLEKHG5
chr1	6557988	6558188	Promoter	PLEKHG5
chr1	6579737	6579937	Promoter	PLEKHG5
chr1	6580010	6580210	Promoter	PLEKHG5
chr1	6580208	6580408	Promoter	PLEKHG5
chr1	6580211	6580411	Promoter	PLEKHG5
chr1	6580287	6580487	Promoter	PLEKHG5
chr1	6580425	6580625	Promoter	PLEKHG5
chr1	6581696	6581896	Promoter	PLEKHG5
chr1	6671760	6671960	Promoter	PHF13
chr1	6683365	6683565	Promoter	THAP3
chr1	6683428	6683628	Promoter	THAP3
chr1	6683552	6683752	Promoter	THAP3
chr1	6784649	6784849	Promoter	LOC100505887
chr1	7844795	7844995	Promoter	PER3
chr1	8485276	8485476	Promoter	RERE
chr1	8931634	8931834	Promoter	ENO1
chr1	8931654	8931854	Promoter	ENO1
chr1	8932259	8932459	Promoter	ENO1
chr1	8940360	8940560	Promoter	ENO1
chr1	9003078	9003278	Promoter	CA6
chr1	9130638	9130838	Promoter	SLC2A5
chr1	9130786	9130986	Promoter	SLC2A5
chr1	9130928	9131128	Promoter	SLC2A5
chr1	9131522	9131722	Promoter	SLC2A5
chr1	9292037	9292237	Promoter	H6PD
chr1	9884632	9884832	Promoter	CLSTN1
chr1	9887836	9888036	Promoter	CLSTN1
chr1	9887884	9888084	Promoter	CLSTN1
chr1	10053879	10054079	Promoter	RBP7
chr1	10455047	10455247	Promoter	PGD
chr1	10508498	10508698	Promoter	CORT
chr1	11713023	11713223	Promoter	FBXO44
chr1	11713138	11713338	Promoter	FBXO44
chr1	11713440	11713640	Promoter	FBXO44
chr1	11713543	11713743	Promoter	FBXO44
chr1	11714169	11714369	Promoter	FBXO44
chr1	11716071	11716271	Promoter	FBXO2
chr1	11742335	11742535	Promoter	MAD2L2
chr1	11792592	11792792	Promoter	AGTRAP
chr1	12039612	12039812	Promoter	MFN2
chr1	12039693	12039893	Promoter	MFN2
chr1	12074538	12074738	Promoter	MIIP
chr1	12248795	12248995	Promoter	MIR4632
chr1	12251720	12251920	Promoter	MIR4632
chr1	12251769	12251969	Promoter	MIR4632
chr1	13843451	13843651	Promoter	LRRC38
chr1	13909061	13909261	Promoter	PDPN
chr1	14025954	14026154	Promoter	PRDM2
chr1	14026037	14026237	Promoter	PRDM2
chr1	14026116	14026316	Promoter	PRDM2
chr1	15255747	15255947	Promoter	KAZN
chr1	15255954	15256154	Promoter	KAZN
chr1	15256027	15256227	Promoter	KAZN
chr1	15256122	15256322	Promoter	KAZN
chr1	15256381	15256581	Promoter	KAZN
chr1	15271730	15271930	Promoter	KAZN
chr1	15271852	15272052	Promoter	KAZN
chr1	15271982	15272182	Promoter	KAZN
chr1	15272138	15272338	Promoter	KAZN
chr1	15272171	15272371	Promoter	KAZN
chr1	15272191	15272391	Promoter	KAZN
chr1	15272226	15272426	Promoter	KAZN
chr1	15499380	15499580	Promoter	C1orf195
chr1	15500622	15500822	Promoter	C1orf195
chr1	15733744	15733944	Promoter	EFHD2
chr1	16007530	16007730	Promoter	PLEKHM2
chr1	16061308	16061508	Promoter	SLC25A34
chr1	16062345	16062545	Promoter	SLC25A34
chr1	16062620	16062820	Promoter	SLC25A34
chr1	16062629	16062829	Promoter	SLC25A34
chr1	16062635	16062835	Promoter	SLC25A34
chr1	16062637	16062837	Promoter	SLC25A34
chr1	16062657	16062857	Promoter	SLC25A34
chr1	16062794	16062994	Promoter	SLC25A34
chr1	16067405	16067605	Promoter	TMEM82
chr1	16090654	16090854	Promoter	FBLIM1
chr1	16090784	16090984	Promoter	FBLIM1
chr1	16090828	16091028	Promoter	FBLIM1
chr1	16091000	16091200	Promoter	FBLIM1
chr1	16091049	16091249	Promoter	FBLIM1
chr1	16135477	16135677	Promoter	UQCRHL
chr1	16401826	16402026	Promoter	FAM131C
chr1	16403334	16403534	Promoter	FAM131C
chr1	16482673	16482873	Promoter	EPHA2
chr1	16485431	16485631	Promoter	EPHA2
chr1	16485506	16485706	Promoter	EPHA2
chr1	16485627	16485827	Promoter	EPHA2
chr1	16485644	16485844	Promoter	EPHA2
chr1	16538913	16539113	Promoter	ARHGEF19
chr1	16539241	16539441	Promoter	ARHGEF19
chr1	17046797	17046997	Promoter	ESPNP
chr1	17311424	17311624	Promoter	MFAP2
chr1	17338829	17339029	Promoter	ATP13A2
chr1	17338857	17339057	Promoter	ATP13A2
chr1	17530576	17530776	Promoter	PADI1
chr1	17697822	17698022	Promoter	PADI6
chr1	17697834	17698034	Promoter	PADI6
chr1	17766817	17767017	Promoter	RCC2
chr1	17767182	17767382	Promoter	RCC2
chr1	17769976	17770176	Promoter	RCC2
chr1	17865234	17865434	Promoter	ARHGEF10L
chr1	18806600	18806800	Promoter	KLHDC7A
chr1	19221425	19221625	Promoter	ALDH4A1
chr1	19229926	19230126	Promoter	ALDH4A1
chr1	19284302	19284502	Promoter	IFFO2
chr1	19614751	19614951	Promoter	AKR7A3
chr1	19922767	19922967	Promoter	MINOS1-NBL1
chr1	19966871	19967071	Promoter	NBL1
chr1	19969831	19970031	Promoter	NBL1
chr1	19969920	19970120	Promoter	NBL1
chr1	19969924	19970124	Promoter	NBL1
chr1	19971884	19972084	Promoter	NBL1
chr1	19974030	19974230	Promoter	NBL1
chr1	19974076	19974276	Promoter	NBL1
chr1	19989565	19989765	Promoter	HTR6
chr1	19990726	19990926	Promoter	HTR6
chr1	20141678	20141878	Promoter	RNF186
chr1	20141681	20141881	Promoter	RNF186
chr1	20204369	20204569	Promoter	OTUD3
chr1	20204935	20205135	Promoter	OTUD3
chr1	20204959	20205159	Promoter	OTUD3
chr1	20205187	20205387	Promoter	OTUD3
chr1	20513708	20513908	Promoter	UBXN10-AS1
chr1	20990721	20990921	Promoter	DDOST
chr1	20991017	20991217	Promoter	DDOST
chr1	21061990	21062190	Promoter	SH2D5
chr1	21501247	21501447	Promoter	EIF4G3
chr1	21501249	21501449	Promoter	EIF4G3
chr1	21977804	21978004	Promoter	RAP1GAP
chr1	21982551	21982751	Promoter	RAP1GAP
chr1	22110292	22110492	Promoter	USP48
chr1	22110498	22110698	Promoter	USP48
chr1	22266253	22266453	Promoter	HSPG2
chr1	22301389	22301589	Promoter	CELA3B
chr1	22353146	22353346	Promoter	LOC101928043
chr1	22470399	22470599	Promoter	WNT4
chr1	22470455	22470655	Promoter	WNT4
chr1	23370413	23370613	Promoter	MIR3115
chr1	23370487	23370687	Promoter	MIR3115
chr1	23693826	23694026	Promoter	ZNF436-AS1
chr1	23697158	23697358	Promoter	ZNF436
chr1	23697197	23697397	Promoter	ZNF436
chr1	23697406	23697606	Promoter	ZNF436
chr1	23697556	23697756	Promoter	ZNF436
chr1	23858201	23858401	Promoter	E2F2
chr1	23953678	23953878	Promoter	MDS2
chr1	23953685	23953885	Promoter	MDS2
chr1	24017843	24018043	Promoter	RPL11
chr1	24127876	24128076	Promoter	GALE
chr1	24128235	24128435	Promoter	GALE
chr1	24128332	24128532	Promoter	GALE
chr1	24152674	24152874	Promoter	HMGCL
chr1	24311130	24311330	Promoter	SRSF10
chr1	24469464	24469664	Promoter	IL22RA1
chr1	24469740	24469940	Promoter	IL22RA1
chr1	24470296	24470496	Promoter	IL22RA1
chr1	24514457	24514657	Promoter	IFNLR1
chr1	24522492	24522692	Promoter	LOC284632
chr1	24649394	24649594	Promoter	GRHL3
chr1	24741449	24741649	Promoter	STPG1,NIPAL3
chr1	24741577	24741777	Promoter	STPG1,NIPAL3
chr1	24745038	24745238	Promoter	STPG1
chr1	24745167	24745367	Promoter	STPG1
chr1	24745295	24745495	Promoter	STPG1
chr1	24745824	24746024	Promoter	STPG1
chr1	24745879	24746079	Promoter	STPG1
chr1	24745923	24746123	Promoter	STPG1
chr1	24745943	24746143	Promoter	STPG1
chr1	24833872	24834072	Promoter	RCAN3
chr1	24834109	24834309	Promoter	RCAN3
chr1	24877907	24878107	Promoter	NCMAP
chr1	25295552	25295752	Promoter	RUNX3
chr1	25596333	25596533	Promoter	RHD
chr1	25941429	25941629	Promoter	MAN1C1
chr1	26145337	26145537	Promoter	MTFR1L
chr1	26145478	26145678	Promoter	MTFR1L
chr1	26153245	26153445	Promoter	LOC646471
chr1	26190055	26190255	Promoter	AUNIP
chr1	26197755	26197955	Promoter	PAQR7
chr1	26198260	26198460	Promoter	PAQR7
chr1	26199654	26199854	Promoter	PAQR7
chr1	26233609	26233809	Promoter	STMN1,MIR3917
chr1	26325098	26325298	Promoter	PAFAH2
chr1	26436660	26436860	Promoter	PDIK1L
chr1	26484898	26485098	Promoter	FAM110D
chr1	26494994	26495194	Promoter	ZNF593
chr1	26495078	26495278	Promoter	ZNF593
chr1	26503523	26503723	Promoter	CNKSR1
chr1	26503678	26503878	Promoter	CNKSR1
chr1	26503758	26503958	Promoter	CNKSR1
chr1	26503833	26504033	Promoter	CNKSR1
chr1	26603870	26604070	Promoter	SH3BGRL3
chr1	26680490	26680690	Promoter	AIM1L
chr1	26680535	26680735	Promoter	AIM1L
chr1	26680541	26680741	Promoter	AIM1L
chr1	26680634	26680834	Promoter	AIM1L
chr1	26680698	26680898	Promoter	AIM1L
chr1	26683968	26684168	Promoter	AIM1L
chr1	26685473	26685673	Promoter	AIM1L
chr1	26703285	26703485	Promoter	ZNF683
chr1	26795436	26795636	Promoter	LOC101928324,HMGN2
chr1	26797485	26797685	Promoter	LOC101928324,HMGN2
chr1	26855665	26855865	Promoter	RPS6KA1
chr1	26871483	26871683	Promoter	RPS6KA1
chr1	27151210	27151410	Promoter	ZDHHC18
chr1	27184643	27184843	Promoter	SFN
chr1	27185841	27186041	Promoter	SFN
chr1	27187894	27188094	Promoter	SFN
chr1	27188405	27188605	Promoter	SFN
chr1	27189170	27189370	Promoter	SFN
chr1	27189198	27189398	Promoter	SFN
chr1	27189579	27189779	Promoter	SFN
chr1	27189687	27189887	Promoter	SFN
chr1	27189885	27190085	Promoter	SFN
chr1	27189988	27190188	Promoter	SFN
chr1	27217258	27217458	Promoter	GPN2
chr1	27287368	27287568	Promoter	KDF1
chr1	27482279	27482479	Promoter	SLC9A1
chr1	27693740	27693940	Promoter	MAP3K6
chr1	27695577	27695777	Promoter	MAP3K6
chr1	27705802	27706002	Promoter	FCN3
chr1	27709930	27710130	Promoter	CD164L2
chr1	27818960	27819160	Promoter	WASF2
chr1	28159185	28159385	Promoter	SCARNA1
chr1	28520247	28520447	Promoter	PTAFR
chr1	28520292	28520492	Promoter	PTAFR
chr1	28520430	28520630	Promoter	PTAFR
chr1	28520453	28520653	Promoter	PTAFR
chr1	28520766	28520966	Promoter	PTAFR
chr1	28582028	28582228	Promoter	SESN2
chr1	28653506	28653706	Promoter	MED18
chr1	28764754	28764954	Promoter	PHACTR4
chr1	28994600	28994800	Promoter	GMEB1
chr1	29208832	29209032	Promoter	EPB41
chr1	31441050	31441250	Promoter	SNORD85
chr1	31441096	31441296	Promoter	SNORD85
chr1	31441174	31441374	Promoter	SNORD85
chr1	31881883	31882083	Promoter	SERINC2
chr1	31881888	31882088	Promoter	SERINC2
chr1	31882050	31882250	Promoter	SERINC2
chr1	31882144	31882344	Promoter	SERINC2
chr1	31983120	31983320	Promoter	LINC01226
chr1	32038337	32038537	Promoter	TINAGL1
chr1	32040592	32040792	Promoter	TINAGL1
chr1	32041187	32041387	Promoter	TINAGL1
chr1	32041215	32041415	Promoter	TINAGL1
chr1	32041227	32041427	Promoter	TINAGL1
chr1	32041632	32041832	Promoter	TINAGL1
chr1	32172104	32172304	Promoter	COL16A1
chr1	32536416	32536616	Promoter	TMEM39B
chr1	32536428	32536628	Promoter	TMEM39B
chr1	32644544	32644744	Promoter	TXLNA
chr1	32670386	32670586	Promoter	IQCC,DCDC2B
chr1	32670595	32670795	Promoter	IQCC,DCDC2B
chr1	32827050	32827250	Promoter	TSSK3
chr1	32829367	32829567	Promoter	FAM229A
chr1	32929615	32929815	Promoter	ZBTB8B
chr1	33203035	33203235	Promoter	KIAA1522
chr1	33206404	33206604	Promoter	KIAA1522
chr1	33206705	33206905	Promoter	KIAA1522
chr1	33226441	33226641	Promoter	KIAA1522
chr1	33226496	33226696	Promoter	KIAA1522
chr1	33227455	33227655	Promoter	KIAA1522
chr1	33231282	33231482	Promoter	KIAA1522
chr1	33347128	33347328	Promoter	HPCA
chr1	33350609	33350809	Promoter	HPCA
chr1	33547703	33547903	Promoter	AZIN2
chr1	33648548	33648748	Promoter	TRIM62
chr1	33790274	33790474	Promoter	A3GALT2
chr1	33813645	33813845	Promoter	LOC101929464
chr1	33842540	33842740	Promoter	PHC2
chr1	33937546	33937746	Promoter	ZSCAN20
chr1	34642402	34642602	Promoter	C1orf94
chr1	35220015	35220215	Promoter	GJB5
chr1	35220234	35220434	Promoter	GJB5
chr1	35220610	35220810	Promoter	GJB5,GJB4
chr1	35220714	35220914	Promoter	GJB5,GJB4
chr1	35244627	35244827	Promoter	GJB3
chr1	35246123	35246323	Promoter	GJB3
chr1	35524404	35524604	Promoter	ZMYM1
chr1	35524485	35524685	Promoter	ZMYM1
chr1	35524507	35524707	Promoter	ZMYM1
chr1	35524713	35524913	Promoter	ZMYM1
chr1	35660386	35660586	Promoter	SFPQ
chr1	36019918	36020118	Promoter	NCDN
chr1	36020614	36020814	Promoter	NCDN
chr1	36020839	36021039	Promoter	NCDN
chr1	36021574	36021774	Promoter	NCDN
chr1	36021862	36022062	Promoter	NCDN
chr1	36026094	36026294	Promoter	KIAA0319L
chr1	36026511	36026711	Promoter	KIAA0319L
chr1	36038018	36038218	Promoter	TFAP2E
chr1	36039296	36039496	Promoter	TFAP2E
chr1	36546575	36546775	Promoter	TEKT2
chr1	36546577	36546777	Promoter	TEKT2
chr1	36770921	36771121	Promoter	SH3D21
chr1	36771262	36771462	Promoter	SH3D21
chr1	36771393	36771593	Promoter	SH3D21
chr1	36771614	36771814	Promoter	SH3D21
chr1	36771681	36771881	Promoter	SH3D21
chr1	36771693	36771893	Promoter	SH3D21
chr1	36793190	36793390	Promoter	EVA1B
chr1	36916644	36916844	Promoter	OSCP1
chr1	38513389	38513589	Promoter	POU3F1
chr1	38514167	38514367	Promoter	POU3F1
chr1	38515188	38515388	Promoter	POU3F1
chr1	38516558	38516758	Promoter	POU3F1
chr1	38516787	38516987	Promoter	POU3F1
chr1	38517172	38517372	Promoter	POU3F1
chr1	39870746	39870946	Promoter	KIAA0754
chr1	39870778	39870978	Promoter	KIAA0754
chr1	40030087	40030287	Promoter	PPIEL,LOC101929516
chr1	40349794	40349994	Promoter	TRIT1
chr1	40349901	40350101	Promoter	TRIT1
chr1	40420199	40420399	Promoter	MFSD2A
chr1	40857962	40858162	Promoter	SMAP2
chr1	41217519	41217719	Promoter	MIR30E
chr1	41245633	41245833	Promoter	KCNQ4
chr1	41329306	41329506	Promoter	CITED4
chr1	41478089	41478289	Promoter	SLFNL1-AS1
chr1	41489447	41489647	Promoter	SLFNL1
chr1	41824182	41824382	Promoter	FOXO6
chr1	41825928	41826128	Promoter	FOXO6
chr1	41826221	41826421	Promoter	FOXO6
chr1	41950137	41950337	Promoter	EDN2
chr1	42384547	42384747	Promoter	HIVEP3
chr1	42503479	42503679	Promoter	HIVEP3
chr1	42617941	42618141	Promoter	GUCA2B
chr1	42618213	42618413	Promoter	GUCA2B
chr1	42630333	42630533	Promoter	GUCA2A
chr1	42630336	42630536	Promoter	GUCA2A
chr1	43205937	43206137	Promoter	CLDN19
chr1	43231149	43231349	Promoter	C1orf50
chr1	43252106	43252306	Promoter	LOC100129924
chr1	43252173	43252373	Promoter	LOC100129924
chr1	43422237	43422437	Promoter	SLC2A1-AS1
chr1	43422972	43423172	Promoter	SLC2A1-AS1
chr1	43427303	43427503	Promoter	SLC2A1
chr1	43751263	43751463	Promoter	C1orf210
chr1	43751270	43751470	Promoter	C1orf210
chr1	43751276	43751476	Promoter	C1orf210
chr1	43751397	43751597	Promoter	C1orf210
chr1	43751404	43751604	Promoter	C1orf210
chr1	43765696	43765896	Promoter	TIE1
chr1	43856373	43856573	Promoter	MED8
chr1	44170289	44170489	Promoter	ST3GAL3
chr1	44170369	44170569	Promoter	ST3GAL3
chr1	44170373	44170573	Promoter	ST3GAL3
chr1	44197770	44197970	Promoter	LOC101929592
chr1	44304692	44304892	Promoter	MIR6079
chr1	44497437	44497637	Promoter	SLC6A9
chr1	44497495	44497695	Promoter	SLC6A9
chr1	44497594	44497794	Promoter	SLC6A9
chr1	44498075	44498275	Promoter	SLC6A9
chr1	44498422	44498622	Promoter	SLC6A9
chr1	44678091	44678291	Promoter	DMAP1
chr1	45243194	45243394	Promoter	SNORD38A,SNORD38B
chr1	45272533	45272733	Promoter	BTBD19,TCTEX1D4
chr1	45807114	45807314	Promoter	MUTYH
chr1	46089493	46089693	Promoter	CCDC17
chr1	46089593	46089793	Promoter	CCDC17
chr1	46089704	46089904	Promoter	CCDC17
chr1	46090007	46090207	Promoter	CCDC17
chr1	46090069	46090269	Promoter	CCDC17
chr1	46601265	46601465	Promoter	PIK3R3
chr1	46640155	46640355	Promoter	TSPAN1
chr1	46664837	46665037	Promoter	POMGNT1,LURAP1
chr1	46668372	46668572	Promoter	POMGNT1,LURAP1
chr1	46766857	46767057	Promoter	UQCRH
chr1	46805240	46805440	Promoter	NSUN4
chr1	46807013	46807213	Promoter	NSUN4
chr1	46859571	46859771	Promoter	FAAH
chr1	46859674	46859874	Promoter	FAAH
chr1	46859691	46859891	Promoter	FAAH
chr1	47016649	47016849	Promoter	KNCN
chr1	47132420	47132620	Promoter	ATPAF1,TEX38
chr1	47132547	47132747	Promoter	ATPAF1,TEX38
chr1	47132780	47132980	Promoter	ATPAF1,TEX38
chr1	47879740	47879940	Promoter	FOXE3
chr1	47898811	47899011	Promoter	FOXD2
chr1	47899112	47899312	Promoter	FOXD2
chr1	47899130	47899330	Promoter	FOXD2
chr1	47900156	47900356	Promoter	FOXD2,FOXD2-AS1
chr1	47900165	47900365	Promoter	FOXD2,FOXD2-AS1
chr1	47900227	47900427	Promoter	FOXD2,FOXD2-AS1
chr1	48648339	48648539	Promoter	SKINTL
chr1	51433516	51433716	Promoter	CDKN2C
chr1	51795093	51795293	Promoter	TTC39A-AS1
chr1	51795137	51795337	Promoter	TTC39A-AS1
chr1	51795240	51795440	Promoter	TTC39A-AS1
chr1	51800435	51800635	Promoter	TTC39A
chr1	52523230	52523430	Promoter	TXNDC12
chr1	52834773	52834973	Promoter	CC2D1B
chr1	53020595	53020795	Promoter	ZCCHC11
chr1	53097217	53097417	Promoter	FAM159A
chr1	53387619	53387819	Promoter	ECHDC2
chr1	53661348	53661548	Promoter	CPT2
chr1	54356160	54356360	Promoter	DIO1,YIPF1
chr1	54619345	54619545	Promoter	CDCP2
chr1	54619464	54619664	Promoter	CDCP2
chr1	54619795	54619995	Promoter	CDCP2
chr1	54623523	54623723	Promoter	CDCP2
chr1	55089384	55089584	Promoter	FAM151A
chr1	55106621	55106821	Promoter	MROH7,MROH7-TTC4
chr1	55106884	55107084	Promoter	MROH7,MROH7-TTC4
chr1	55107032	55107232	Promoter	MROH7,MROH7-TTC4
chr1	55107191	55107391	Promoter	MROH7,MROH7-TTC4
chr1	55271573	55271773	Promoter	TTC22,C1orf177
chr1	55271802	55272002	Promoter	TTC22,C1orf177
chr1	55271821	55272021	Promoter	TTC22,C1orf177
chr1	55353606	55353806	Promoter	DHCR24
chr1	57285060	57285260	Promoter	C1orf168
chr1	57320457	57320657	Promoter	C8A
chr1	57320585	57320785	Promoter	C8A
chr1	59013429	59013629	Promoter	OMA1
chr1	59042970	59043170	Promoter	TACSTD2
chr1	59043099	59043299	Promoter	TACSTD2
chr1	59043108	59043308	Promoter	TACSTD2
chr1	59484500	59484700	Promoter	LINC01358
chr1	59484697	59484897	Promoter	LINC01358
chr1	59484703	59484903	Promoter	LINC01358
chr1	59774150	59774350	Promoter	FGGY
chr1	60234519	60234719	Promoter	LOC101926944
chr1	61544975	61545175	Promoter	NFIA
chr1	61546079	61546279	Promoter	NFIA
chr1	61546114	61546314	Promoter	NFIA
chr1	62207225	62207425	Promoter	INADL
[truncated: 8,931 more rows]

## Sheet: hyper enhancer genes nodule
chr1	846095	846295	Enhancer	NOC2L;RP11;PLEKHN1;C1orf170;RP11;RP11;HES4;AGRN;KLHL17;C1orf159;SDF4;B3GALT6;UBE2J2;RP5;SCNN1D;PUSL1;ACAP3;RP5;CPSF3L;GLTPD1;TAS1R3;DVL1;AURKAIP1;MRPL20	Keratinocyte;Keratinocyte;Keratinocyte;Keratinocyte;Keratinocyte;Keratinocyte;Keratinocyte;Keratinocyte;Keratinocyte;Keratinocyte;Keratinocyte;Keratinocyte;Keratinocyte;Keratinocyte;Keratinocyte;Keratinocyte;Keratinocyte;Keratinocyte;Keratinocyte;Keratinocyte;Keratinocyte;Keratinocyte;Keratinocyte;Keratinocyte
[truncated: 6,264 more rows]

[truncated: 6 more sheets: list of hyper enhancer nodule, list of hyper promoter nodule, plaque hyper promoter, plaque hyper enhancer, list hyper enhancer plaque_x0009_, hyper all plaque]
