# Supplementary material for: Global CpG DNA Methylation Footprint in Kaposi’s Sarcoma
Source: Front Cell Infect Microbiol. 2021 Jul 9;11:666143. doi: 10.3389/fcimb.2021.666143 (PMC8300563; doi:10.3389/fcimb.2021.666143)
Supplement: Supplementary Table 3 — Hypo methylated promoters and enhancers. [file Table_3.xlsx]

## Sheet: all nodule
chr1	2187357	2187557	Enhancer	GNB1;PRKCZ;RP11;RP11;C1orf86;AL590822.1;SKI;RP4;RER1;PEX10;PLCH2;RP3;RP3;PANK4;TNFRSF14;FAM213B;MMEL1	Keratinocyte;Keratinocyte;Keratinocyte;Keratinocyte;Keratinocyte;Keratinocyte;Keratinocyte;Keratinocyte;Keratinocyte;Keratinocyte;Keratinocyte;Keratinocyte;Keratinocyte;Keratinocyte;Keratinocyte;Keratinocyte;Keratinocyte
chr1	2187662	2187862	Enhancer	GNB1;PRKCZ;RP11;RP11;C1orf86;AL590822.1;SKI;RP4;RER1;PEX10;PLCH2;RP3;RP3;PANK4;TNFRSF14;FAM213B;MMEL1	Keratinocyte;Keratinocyte;Keratinocyte;Keratinocyte;Keratinocyte;Keratinocyte;Keratinocyte;Keratinocyte;Keratinocyte;Keratinocyte;Keratinocyte;Keratinocyte;Keratinocyte;Keratinocyte;Keratinocyte;Keratinocyte;Keratinocyte
chr1	6088307	6088507	Enhancer	KCNAB2;ACOT7;HES2;ESPN;RP1	Keratinocyte;Keratinocyte;Keratinocyte;Keratinocyte;Keratinocyte
chr1	7168303	7168503	Enhancer	DNAJC11	Keratinocyte
chr1	15575618	15575818	Enhancer	C1orf126;TMEM51;C1orf195;RP1;FHAD1;DNAJC16;CHCHD2P6;DDI2;RSC1A1;PLEKHM2	Keratinocyte;Keratinocyte;Keratinocyte;Keratinocyte;Keratinocyte;Keratinocyte;Keratinocyte;Keratinocyte;Keratinocyte;Keratinocyte
chr1	25554414	25554614	Enhancer	SYF2;RP3;RHD;SDHDP6;RP11;TMEM50A;C1orf63;SDHDP1;TMEM57	HUVEC;HUVEC;HUVEC;HUVEC;HUVEC;HUVEC;HUVEC;HUVEC;HUVEC
chr1	31118763	31118963	Enhancer	PUM1;ZCCHC17	Keratinocyte;Keratinocyte
chr1	31229022	31229222	Enhancer	RP5;MATN1;LAPTM5;RP11;ZCCHC17;SERINC2	Keratinocyte;Keratinocyte;Keratinocyte;Keratinocyte;Keratinocyte;Keratinocyte
chr1	31263694	31263894	Enhancer	ZCCHC17;SERINC2	Keratinocyte;Keratinocyte
chr1	39428163	39428363	Enhancer	RP11;RRAGC;RP5;MYCBP;RHBDL2;AKIRIN1;NDUFS5;MACF1;RP11;RP11;KIAA0754;PABPC4	Keratinocyte;Keratinocyte;Keratinocyte;Keratinocyte;Keratinocyte;Keratinocyte;Keratinocyte;Keratinocyte;Keratinocyte;Keratinocyte;Keratinocyte;Keratinocyte
chr1	40525069	40525269	Enhancer	Y;TRIT1;RP1;MYCL1;CAP1;PPT1;RP11;RLF;TMCO2;RP1;ZMPSTE24;RP1	HUVEC;HUVEC;HUVEC;HUVEC;HUVEC;HUVEC;HUVEC;HUVEC;HUVEC;HUVEC;HUVEC;HUVEC
chr1	40735975	40736175	Enhancer	Y;TRIT1;MFSD2A;RP3;CAP1;PPT1;RP11;TMCO2;RP1;ZMPSTE24;RP1;COL9A2;RP1;SMAP2;RP1;ZNF643;RP1;ZNF642;ZNF684	HUVEC;HUVEC;HUVEC;HUVEC;HUVEC;HUVEC;HUVEC;HUVEC;HUVEC;HUVEC;HUVEC;HUVEC;HUVEC;HUVEC;HUVEC;HUVEC;HUVEC;HUVEC;HUVEC
chr1	82168646	82168846	Enhancer	LPHN2;RP5;RP5;ST13P20	Keratinocyte;Keratinocyte;Keratinocyte;Keratinocyte
chr1	82169215	82169415	Enhancer	LPHN2;RP5;RP5;ST13P20	Keratinocyte;Keratinocyte;Keratinocyte;Keratinocyte
chr1	84831493	84831693	Enhancer	RP11;RP11;UOX;RPF1;SPATA1;GNG5;CTBS	HUVEC;HUVEC;HUVEC;HUVEC;HUVEC;HUVEC;HUVEC
chr1	90321353	90321553	Enhancer	RP11;RP5;LRRC8C;RP5;LRRC8D;ZNF326;GEMIN8P4	Keratinocyte;Keratinocyte;Keratinocyte;Keratinocyte;Keratinocyte;Keratinocyte;Keratinocyte
chr1	112942187	112942387	Enhancer	RP5;RP5;CTTNBP2NL;RP4;WNT2B;CAPZA1;ST7L;MRPL53P1;MOV10;RP11;RHOC;PPM1J;RP11;SLC16A1	Keratinocyte;Keratinocyte;Keratinocyte;Keratinocyte;Keratinocyte;Keratinocyte;Keratinocyte;Keratinocyte;Keratinocyte;Keratinocyte;Keratinocyte;Keratinocyte;Keratinocyte;Keratinocyte
chr1	150971653	150971853	Enhancer	SNORA40;ENSA;GOLPH3L;UBE2D3P3;CTSK;ARNT;RP11;RP11;SETDB1;RP11;RP11;CERS2;ANXA9;FAM63A;PRUNE;BNIPL;C1orf56;MLLT11;CDC42SE1;RP11;GABPB2;RP11;SEMA6C;TNFAIP8L2;LYSMD1;SCNM1;TMOD4;VPS72;PIP5K1A;PSMD4;ZNF687;RP11;PI4KB;RP11;RP11;RFX5;SELENBP1;PSMB4	HUVEC;HUVEC;HUVEC;HUVEC;HUVEC;HUVEC;HUVEC;HUVEC;HUVEC;HUVEC;HUVEC;HUVEC;HUVEC;HUVEC;HUVEC;HUVEC;HUVEC;HUVEC;HUVEC;HUVEC;HUVEC;HUVEC;HUVEC;HUVEC;HUVEC;HUVEC;HUVEC;HUVEC;HUVEC;HUVEC;HUVEC;HUVEC;HUVEC;HUVEC;HUVEC;HUVEC;HUVEC;HUVEC
chr1	150971789	150971989	Enhancer	SNORA40;ENSA;GOLPH3L;UBE2D3P3;CTSK;ARNT;RP11;RP11;SETDB1;RP11;RP11;CERS2;ANXA9;FAM63A;PRUNE;BNIPL;C1orf56;MLLT11;CDC42SE1;RP11;GABPB2;RP11;SEMA6C;TNFAIP8L2;LYSMD1;SCNM1;TMOD4;VPS72;PIP5K1A;PSMD4;ZNF687;RP11;PI4KB;RP11;RP11;RFX5;SELENBP1;PSMB4	HUVEC;HUVEC;HUVEC;HUVEC;HUVEC;HUVEC;HUVEC;HUVEC;HUVEC;HUVEC;HUVEC;HUVEC;HUVEC;HUVEC;HUVEC;HUVEC;HUVEC;HUVEC;HUVEC;HUVEC;HUVEC;HUVEC;HUVEC;HUVEC;HUVEC;HUVEC;HUVEC;HUVEC;HUVEC;HUVEC;HUVEC;HUVEC;HUVEC;HUVEC;HUVEC;HUVEC;HUVEC;HUVEC
chr1	151072326	151072526	Enhancer	ARNT;SETDB1;RP11;CERS2;FAM63A;PRUNE;BNIPL;C1orf56;MLLT11;CDC42SE1;RP11;GABPB2;SEMA6C;TMOD4;VPS72;PIP5K1A;PSMD4;ZNF687;RP11;PI4KB;RP11;RP11;RFX5;SELENBP1;PSMB4;POGZ	HUVEC;HUVEC;HUVEC;HUVEC;HUVEC;HUVEC;HUVEC;HUVEC;HUVEC;HUVEC;HUVEC;HUVEC;HUVEC;HUVEC;HUVEC;HUVEC;HUVEC;HUVEC;HUVEC;HUVEC;HUVEC;HUVEC;HUVEC;HUVEC;HUVEC;HUVEC
chr1	151129744	151129944	Enhancer	ARNT;SETDB1;RP11;CERS2;ANXA9;FAM63A;PRUNE;C1orf56;MLLT11;CDC42SE1;RP11;GABPB2;RP11;TNFAIP8L2;SCNM1;TMOD4;VPS72;PIP5K1A;PSMD4;ZNF687;RP11;PI4KB;RP11;RP11;RFX5;SELENBP1;PSMB4;POGZ;S100A11	HUVEC;HUVEC;HUVEC;HUVEC;HUVEC;HUVEC;HUVEC;HUVEC;HUVEC;HUVEC;HUVEC;HUVEC;HUVEC;HUVEC;HUVEC;HUVEC;HUVEC;HUVEC;HUVEC;HUVEC;HUVEC;HUVEC;HUVEC;HUVEC;HUVEC;HUVEC;HUVEC;HUVEC;HUVEC
chr1	153358824	153359024	Enhancer	IVL;SPRR4;SPRR1A;SPRR3;SPRR1B;SPRR2D;SPRR2A;SPRR2E;SPRR2B;SPRR2G;PRR9;RP1;PGLYRP3;PGLYRP4;S100A9;S100A12;AL591704.5;S100A8;S100A7A;S100A6;S100A5;S100A3;S100A4;S100A2;S100A16;S100A14;S100A1;CHTOP;S100A13;SNAPIN;ILF2;RP11;INTS3;RP11;RP11;SLC27A3;RP11;CRTC2;CREB3L4;SLC39A1;RPS27;RP11	Keratinocyte;Keratinocyte;Keratinocyte;Keratinocyte;Keratinocyte;Keratinocyte;Keratinocyte;Keratinocyte;Keratinocyte;Keratinocyte;Keratinocyte;Keratinocyte;Keratinocyte;Keratinocyte;Keratinocyte;Keratinocyte;Keratinocyte;Keratinocyte;Keratinocyte;Keratinocyte;Keratinocyte;Keratinocyte;Keratinocyte;Keratinocyte;Keratinocyte;Keratinocyte;Keratinocyte;Keratinocyte;Keratinocyte;Keratinocyte;Keratinoc…
chr1	156127427	156127627	Enhancer	DAP3;RP11;GON4L;SYT11;RIT1;SCARNA4;KIAA0907;RP11;ARHGEF2;SSR2;UBQLN4;LAMTOR2;RAB25;AL355388.1;MEX3A;LMNA;SEMA4A;SLC25A44;RP11;PMF1;BGLAP;PAQR6;SMG5;TMEM79;C1orf85;VHLL;C1orf182;CCT3;RHBG;Y;MEF2D;IQGAP3;APOA1BP;GPATCH4;NES;ISG20L2;MRPL24;PRCC;HDGF;PEAR1	HUVEC;HUVEC;HUVEC;HUVEC;HUVEC;HUVEC;HUVEC;HUVEC;HUVEC;HUVEC;HUVEC;HUVEC;HUVEC;HUVEC;HUVEC;HUVEC;HUVEC;HUVEC;HUVEC;HUVEC;HUVEC;HUVEC;HUVEC;HUVEC;HUVEC;HUVEC;HUVEC;HUVEC;HUVEC;HUVEC;HUVEC;HUVEC;HUVEC;HUVEC;HUVEC;HUVEC;HUVEC;HUVEC;HUVEC;HUVEC
chr1	167586838	167587038	Enhancer	POU2F1;MPZL1;RP1;RP1;DCAF6;BRP44;RP4	Keratinocyte;Keratinocyte;Keratinocyte;Keratinocyte;Keratinocyte;Keratinocyte;Keratinocyte
chr1	167607132	167607332	Enhancer	RP1;RP1;RP4	Keratinocyte;Keratinocyte;Keratinocyte
chr1	170635022	170635222	Enhancer	PRRX1	Keratinocyte
chr1	172668486	172668686	Enhancer	PIGC;C1orf9	Keratinocyte;Keratinocyte
chr1	184861011	184861211	Enhancer	C1orf21;FAM129A;RNF2;CTA;RP4	Keratinocyte;Keratinocyte;Keratinocyte;Keratinocyte;Keratinocyte
chr1	186062673	186062873	Enhancer	GS1;PRG4;TPR;C1orf27;OCLM	HUVEC;HUVEC;HUVEC;HUVEC;HUVEC
chr1	186708160	186708360	Enhancer	TPR;C1orf27;OCLM	Keratinocyte;Keratinocyte;Keratinocyte
chr1	204433959	204434159	Enhancer	SNRPE;SOX13;RP11;PLEKHA6;RP11;RP11;PPP1R15B	HUVEC;HUVEC;HUVEC;HUVEC;HUVEC;HUVEC;HUVEC
chr1	204695116	204695316	Enhancer	RP11	Keratinocyte
chr1	209897514	209897714	Enhancer	RP11;ATP5G2P1;RP11;MIR205HG;RP1;CAMK1G;G0S2;HSD11B1;TRAF3IP3;C1orf74;RP3;IRF6;DIEXF;SYT14	Keratinocyte;Keratinocyte;Keratinocyte;Keratinocyte;Keratinocyte;Keratinocyte;Keratinocyte;Keratinocyte;Keratinocyte;Keratinocyte;Keratinocyte;Keratinocyte;Keratinocyte;Keratinocyte
chr1	209897558	209897758	Enhancer	RP11;ATP5G2P1;RP11;MIR205HG;RP1;CAMK1G;G0S2;HSD11B1;TRAF3IP3;C1orf74;RP3;IRF6;DIEXF;SYT14	Keratinocyte;Keratinocyte;Keratinocyte;Keratinocyte;Keratinocyte;Keratinocyte;Keratinocyte;Keratinocyte;Keratinocyte;Keratinocyte;Keratinocyte;Keratinocyte;Keratinocyte;Keratinocyte
chr1	209897737	209897937	Enhancer	RP11;ATP5G2P1;RP11;MIR205HG;RP1;CAMK1G;G0S2;HSD11B1;TRAF3IP3;C1orf74;RP3;IRF6;DIEXF;SYT14	Keratinocyte;Keratinocyte;Keratinocyte;Keratinocyte;Keratinocyte;Keratinocyte;Keratinocyte;Keratinocyte;Keratinocyte;Keratinocyte;Keratinocyte;Keratinocyte;Keratinocyte;Keratinocyte
chr1	209943031	209943231	Enhancer	RP11;ATP5G2P1;MIR205HG;RP1;CAMK1G;G0S2;ADORA2BP;TRAF3IP3;C1orf74;RP3;IRF6;DIEXF;SYT14	Keratinocyte;Keratinocyte;Keratinocyte;Keratinocyte;Keratinocyte;Keratinocyte;Keratinocyte;Keratinocyte;Keratinocyte;Keratinocyte;Keratinocyte;Keratinocyte;Keratinocyte
chr1	214577621	214577821	Enhancer	SMYD2;RP11;RP11;KRT18P12;PTPN14;CENPF;FAM108A4P	Keratinocyte;Keratinocyte;Keratinocyte;Keratinocyte;Keratinocyte;Keratinocyte;Keratinocyte
chr1	215130854	215131054	Enhancer	RP11;CENPF	Keratinocyte;Keratinocyte
chr1	218880429	218880629	Enhancer	RRP15;RP11	Keratinocyte;Keratinocyte
chr1	220310770	220310970	Enhancer	snoU13;EPRS;BPNT1;IARS2;MIR215;RP11	HUVEC;HUVEC;HUVEC;HUVEC;HUVEC;HUVEC
chr1	224023197	224023397	Enhancer	SNRPEP10;CAPN8;CAPN2;TP53BP2;PHBP11;ACTBP11;CICP5;RP11;RP11;RP11;RP11;FBXO28;RP11;DEGS1;CNIH4	Keratinocyte;Keratinocyte;Keratinocyte;Keratinocyte;Keratinocyte;Keratinocyte;Keratinocyte;Keratinocyte;Keratinocyte;Keratinocyte;Keratinocyte;Keratinocyte;Keratinocyte;Keratinocyte;Keratinocyte
chr1	224023440	224023640	Enhancer	SNRPEP10;CAPN8;CAPN2;TP53BP2;PHBP11;ACTBP11;CICP5;RP11;RP11;RP11;RP11;FBXO28;RP11;DEGS1;CNIH4	Keratinocyte;Keratinocyte;Keratinocyte;Keratinocyte;Keratinocyte;Keratinocyte;Keratinocyte;Keratinocyte;Keratinocyte;Keratinocyte;Keratinocyte;Keratinocyte;Keratinocyte;Keratinocyte;Keratinocyte
chr1	230259488	230259688	Enhancer	GALNT2	Keratinocyte
chr1	234867200	234867400	Enhancer	RP5;C1orf31;IRF2BP2;RP4;RP4;RP4;RBM34	Keratinocyte;Keratinocyte;Keratinocyte;Keratinocyte;Keratinocyte;Keratinocyte;Keratinocyte
chr2	9427937	9428137	Enhancer	KIDINS220;MBOAT2;ASAP2;RP11;ITGB1BP1;CPSF3;IAH1;ADAM17;YWHAQ	Keratinocyte;Keratinocyte;Keratinocyte;Keratinocyte;Keratinocyte;Keratinocyte;Keratinocyte;Keratinocyte;Keratinocyte
chr2	9428564	9428764	Enhancer	KIDINS220;MBOAT2;ASAP2;RP11;ITGB1BP1;CPSF3;IAH1;ADAM17;YWHAQ	Keratinocyte;Keratinocyte;Keratinocyte;Keratinocyte;Keratinocyte;Keratinocyte;Keratinocyte;Keratinocyte;Keratinocyte
chr2	9518224	9518424	Enhancer	ASAP2;RP11;ITGB1BP1;CPSF3;IAH1;RP11;ADAM17;YWHAQ	HUVEC;HUVEC;HUVEC;HUVEC;HUVEC;HUVEC;HUVEC;HUVEC
chr2	10237442	10237642	Enhancer	IAH1;YWHAQ;TAF1B;GRHL1	Keratinocyte;Keratinocyte;Keratinocyte;Keratinocyte
chr2	16835058	16835258	Enhancer	FAM49A	Keratinocyte
chr2	37938540	37938740	Enhancer	AC007390.5;QPCT;CDC42EP3;AC010878.3	Keratinocyte;Keratinocyte;Keratinocyte;Keratinocyte
chr2	54823511	54823711	Enhancer	SPTBN1;AC092839.1;AC093110.3;EML6;RTN4;RPS27A	Keratinocyte;Keratinocyte;Keratinocyte;Keratinocyte;Keratinocyte;Keratinocyte
chr2	54823668	54823868	Enhancer	SPTBN1;AC092839.1;AC093110.3;EML6;RTN4;RPS27A	Keratinocyte;Keratinocyte;Keratinocyte;Keratinocyte;Keratinocyte;Keratinocyte
chr2	65459246	65459446	Enhancer	SLC1A4;CEP68;RAB1A;AC007318.5;ACTR2;SPRED2;AC007389.4	Keratinocyte;Keratinocyte;Keratinocyte;Keratinocyte;Keratinocyte;Keratinocyte;Keratinocyte
chr2	65459905	65460105	Enhancer	SLC1A4;CEP68;RAB1A;AC007318.5;ACTR2;SPRED2;AC007389.4	Keratinocyte;Keratinocyte;Keratinocyte;Keratinocyte;Keratinocyte;Keratinocyte;Keratinocyte
chr2	69023442	69023642	Enhancer	PROKR1;ARHGAP25;GKN1;ANTXR1	Keratinocyte;Keratinocyte;Keratinocyte;Keratinocyte
chr2	70161465	70161665	Enhancer	RP11;AC092431.2;AC092431.1;AAK1;ANXA4;GMCL1;SNRNP27;MXD1;ASPRV1;PCBP1;PCBP1;AC016700.4;AC016700.3;C2orf42;TIA1;PCYOX1;SNRPG;AC022201.5;FAM136A	Keratinocyte;Keratinocyte;Keratinocyte;Keratinocyte;Keratinocyte;Keratinocyte;Keratinocyte;Keratinocyte;Keratinocyte;Keratinocyte;Keratinocyte;Keratinocyte;Keratinocyte;Keratinocyte;Keratinocyte;Keratinocyte;Keratinocyte;Keratinocyte;Keratinocyte
chr2	85121986	85122186	Enhancer	TMSB10;C2orf89;AC022210.2;KCMF1;RP11;AC011236.7;TCF7L1;AC093162.5;TGOLN2;ELMOD3;RETSAT;CAPG;MAT2A	Keratinocyte;Keratinocyte;Keratinocyte;Keratinocyte;Keratinocyte;Keratinocyte;Keratinocyte;Keratinocyte;Keratinocyte;Keratinocyte;Keratinocyte;Keratinocyte;Keratinocyte
chr2	97204301	97204501	Enhancer	NEURL3;ARID5A	Keratinocyte;Keratinocyte
chr2	102517022	102517222	Enhancer	C2orf29;AC092570.4;MAP4K4;AC005035.1	Keratinocyte;Keratinocyte;Keratinocyte;Keratinocyte
chr2	102717338	102717538	Enhancer	MAP4K4;AC005035.1;IL1R2;IL1R1;IL1RL2	Keratinocyte;Keratinocyte;Keratinocyte;Keratinocyte;Keratinocyte
chr2	102875272	102875472	Enhancer	MAP4K4;AC005035.1;IL1R2	Keratinocyte;Keratinocyte;Keratinocyte
chr2	102954250	102954450	Enhancer	MAP4K4;IL1R2;IL1RL1;IL18R1	Keratinocyte;Keratinocyte;Keratinocyte;Keratinocyte
chr2	109227383	109227583	Enhancer	GCC2;AC012487.2;LIMS1;AC010095.5;AC010095.7;RANBP2;CCDC138;AC073415.2	Keratinocyte;Keratinocyte;Keratinocyte;Keratinocyte;Keratinocyte;Keratinocyte;Keratinocyte;Keratinocyte
chr2	109257329	109257529	Enhancer	GCC2;AC012487.2;LIMS1;AC010095.5;AC010095.7;RANBP2;CCDC138;AC073415.2	Keratinocyte;Keratinocyte;Keratinocyte;Keratinocyte;Keratinocyte;Keratinocyte;Keratinocyte;Keratinocyte
chr2	114008807	114009007	Enhancer	AC079922.2;SLC20A1;IL1A;IL1B;AC079753.4;AC079753.5;IL36G;HMGN2P23;AC016724.6;IL36RN;IL1F10;IL1RN;PSD4;AC016683.5;AC016683.6;RP11;PAX8;AC016745.2;AC016745.3;CBWD2;WASH2P;RPL23AP7;RABL2A;RP11	Keratinocyte;Keratinocyte;Keratinocyte;Keratinocyte;Keratinocyte;Keratinocyte;Keratinocyte;Keratinocyte;Keratinocyte;Keratinocyte;Keratinocyte;Keratinocyte;Keratinocyte;Keratinocyte;Keratinocyte;Keratinocyte;Keratinocyte;Keratinocyte;Keratinocyte;Keratinocyte;Keratinocyte;Keratinocyte;Keratinocyte;Keratinocyte
chr2	118879712	118879912	Enhancer	DDX18;AC009404.2;INSIG2	Keratinocyte;Keratinocyte;Keratinocyte
chr2	120213076	120213276	Enhancer	DBI;TMEM37	HUVEC;HUVEC
chr2	138775056	138775256	Enhancer	HNMT;AC097523.1;AC097523.2;AC097523.3;AC097721.1	Keratinocyte;Keratinocyte;Keratinocyte;Keratinocyte;Keratinocyte
chr2	160082860	160083060	Enhancer	BTF3L4P2;WDSUB1;AC009506.2;Y;AC009506.1;BAZ2B	HUVEC;HUVEC;HUVEC;HUVEC;HUVEC;HUVEC
chr2	161156121	161156321	Enhancer	PLA2R1;ITGB6;RBMS1	Keratinocyte;Keratinocyte;Keratinocyte
chr2	161189022	161189222	Enhancer	PLA2R1;ITGB6;RBMS1	Keratinocyte;Keratinocyte;Keratinocyte
chr2	161934136	161934336	Enhancer	AC009299.3;PSMD14;AC009299.5;AC009487.6	Keratinocyte;Keratinocyte;Keratinocyte;Keratinocyte
chr2	190309086	190309286	Enhancer	WDR75;ASNSD1	Keratinocyte;Keratinocyte
chr2	191709027	191709227	Enhancer	NAB1;GLS;AC005540.3;AC067945.3;STAT1;MYO1B;AC092614.2	Keratinocyte;Keratinocyte;Keratinocyte;Keratinocyte;Keratinocyte;Keratinocyte;Keratinocyte
chr2	192186313	192186513	Enhancer	GLS;AC005540.3;AC067945.3;STAT1;STAT4;MYO1B;AC092614.2;OBFC2A	Keratinocyte;Keratinocyte;Keratinocyte;Keratinocyte;Keratinocyte;Keratinocyte;Keratinocyte;Keratinocyte
chr2	192710574	192710774	Enhancer	MYO1B;AC098617.2;SDPR;DNAJB1P1	Keratinocyte;Keratinocyte;Keratinocyte;Keratinocyte
chr2	192710923	192711123	Enhancer	MYO1B;AC098617.2;SDPR;DNAJB1P1	Keratinocyte;Keratinocyte;Keratinocyte;Keratinocyte
chr2	196424281	196424481	Enhancer	AC064834.4	Keratinocyte
chr2	202519459	202519659	Enhancer	AC007283.5;STRADB;ALS2CR11;ENO1P4;TMEM237;ALS2;AC007242.3	HUVEC;HUVEC;HUVEC;HUVEC;HUVEC;HUVEC;HUVEC
chr2	206004653	206004853	Enhancer	AC008171.1	HUVEC
chr2	206564386	206564586	Enhancer	NRP2;AC007362.3;AC007362.1	Keratinocyte;Keratinocyte;Keratinocyte
chr2	206565128	206565328	Enhancer	NRP2;AC007362.3;AC007362.1	Keratinocyte;Keratinocyte;Keratinocyte
chr2	208087896	208088096	Enhancer	FASTKD2;KLF7;AC007879.4;AC007879.2;AC007879.7;CREB1;AC007879.5;AC079767.2;METTL21A;PPP1R14BP2	Keratinocyte;Keratinocyte;Keratinocyte;Keratinocyte;Keratinocyte;Keratinocyte;Keratinocyte;Keratinocyte;Keratinocyte;Keratinocyte
chr2	223385921	223386121	Enhancer	SGPP2;FARSB;AC016712.2;ACSL3;ATG12P2;AC097461.4	Keratinocyte;Keratinocyte;Keratinocyte;Keratinocyte;Keratinocyte;Keratinocyte
chr2	224749280	224749480	Enhancer	AP1S3;WDFY1;MRPL44;AC073641.2;SERPINE2	Keratinocyte;Keratinocyte;Keratinocyte;Keratinocyte;Keratinocyte
chr2	224761569	224761769	Enhancer	AP1S3;WDFY1;MRPL44;AC073641.2;SERPINE2	Keratinocyte;Keratinocyte;Keratinocyte;Keratinocyte;Keratinocyte
chr2	227292378	227292578	Enhancer	IRS1;RHBDD1	Keratinocyte;Keratinocyte
chr2	237652269	237652469	Enhancer	CXCR7;COPS8	Keratinocyte;Keratinocyte
chr3	4780405	4780605	Enhancer	SUMF1;EGOT;BHLHE40;ARL8B;EDEM1	Keratinocyte;Keratinocyte;Keratinocyte;Keratinocyte;Keratinocyte
chr3	16553399	16553599	Enhancer	DPH3;OXNAD1;RFTN1	Keratinocyte;Keratinocyte;Keratinocyte
chr3	30654771	30654971	Enhancer	AC116035.1;TGFBR2;AC096921.2;RP11	Keratinocyte;Keratinocyte;Keratinocyte;Keratinocyte
chr3	30654965	30655165	Enhancer	AC116035.1;TGFBR2;AC096921.2;RP11	Keratinocyte;Keratinocyte;Keratinocyte;Keratinocyte
chr3	30699956	30700156	Enhancer	AC116035.1;TGFBR2;AC096921.2;RP11	Keratinocyte;Keratinocyte;Keratinocyte;Keratinocyte
chr3	30700336	30700536	Enhancer	AC116035.1;TGFBR2;AC096921.2;RP11	Keratinocyte;Keratinocyte;Keratinocyte;Keratinocyte
chr3	31052152	31052352	Enhancer	TGFBR2;THRAP3P1	Keratinocyte;Keratinocyte
chr3	31055997	31056197	Enhancer	TGFBR2	Keratinocyte
chr3	32290982	32291182	Enhancer	ZNF860;RPL21P40;RP11;CMTM8;KRT18P15;CMTM7;CMTM6;AC104306.1;DYNC1LI1;IGBP1P3;AC138972.1;CNOT10	Keratinocyte;Keratinocyte;Keratinocyte;Keratinocyte;Keratinocyte;Keratinocyte;Keratinocyte;Keratinocyte;Keratinocyte;Keratinocyte;Keratinocyte;Keratinocyte
chr3	32434239	32434439	Enhancer	ZNF860;OSBPL10;GPD1L;AC097639.8;RP11;CMTM8;KRT18P15;CMTM7;CMTM6;AC104306.1;DYNC1LI1;IGBP1P3;AC138972.1;CNOT10;SUGT1P2;AC139452.2	Keratinocyte;Keratinocyte;Keratinocyte;Keratinocyte;Keratinocyte;Keratinocyte;Keratinocyte;Keratinocyte;Keratinocyte;Keratinocyte;Keratinocyte;Keratinocyte;Keratinocyte;Keratinocyte;Keratinocyte;Keratinocyte
chr3	37095899	37096099	Enhancer	EPM2AIP1;MLH1;AC011816.4;UBE2D3P2;LRRFIP2;GOLGA4	HUVEC;HUVEC;HUVEC;HUVEC;HUVEC;HUVEC
chr3	38648888	38649088	Enhancer	SCN5A	HUVEC
chr3	45160170	45160370	Enhancer	RP11;ZNF502;ZNF501;KIAA1143;TMEM42;EXOSC7;ZDHHC3;CLEC3B;CDCP1;RP11;AC010170.1;TMEM158;LARS2;SACM1L	Keratinocyte;Keratinocyte;Keratinocyte;Keratinocyte;Keratinocyte;Keratinocyte;Keratinocyte;Keratinocyte;Keratinocyte;Keratinocyte;Keratinocyte;Keratinocyte;Keratinocyte;Keratinocyte
chr3	58335632	58335832	Enhancer	SLMAP;PPIAP16;FLNB;FLNB;DNASE1L3;ABHD6;RP11;RPP14;PXK;PDHB	Keratinocyte;Keratinocyte;Keratinocyte;Keratinocyte;Keratinocyte;Keratinocyte;Keratinocyte;Keratinocyte;Keratinocyte;Keratinocyte
chr3	61656197	61656397	Enhancer	RPL10AP6	Keratinocyte
chr3	65605192	65605392	Enhancer	RP11	Keratinocyte
chr3	69417318	69417518	Enhancer	C3orf64;CTD;TMF1;UBA3;ARL6IP5;RP11;RP11;FRMD4B;MITF	Keratinocyte;Keratinocyte;Keratinocyte;Keratinocyte;Keratinocyte;Keratinocyte;Keratinocyte;Keratinocyte;Keratinocyte
chr3	98690440	98690640	Enhancer	RP11;CPOX;RP11;ST3GAL6;RP11;CTD	Keratinocyte;Keratinocyte;Keratinocyte;Keratinocyte;Keratinocyte;Keratinocyte
chr3	99113036	99113236	Enhancer	C3orf26	Keratinocyte
chr3	107704488	107704688	Enhancer	CD47;IFT57	Keratinocyte;Keratinocyte
chr3	111414572	111414772	Enhancer	CD96;RP11;ZBED2;PLCXD2;PLCXD2;PHLDB2;ABHD10;TAGLN3;TMPRSS7;C3orf52;GCET2;RP11	Keratinocyte;Keratinocyte;Keratinocyte;Keratinocyte;Keratinocyte;Keratinocyte;Keratinocyte;Keratinocyte;Keratinocyte;Keratinocyte;Keratinocyte;Keratinocyte
chr3	118903628	118903828	Enhancer	IGSF11;UPK1B;B4GALT4;B4GALT4;ARHGAP31;RPS26P21;TIMMDC1	Keratinocyte;Keratinocyte;Keratinocyte;Keratinocyte;Keratinocyte;Keratinocyte;Keratinocyte
chr3	124829307	124829507	Enhancer	UMPS;HEG1;ZNF148	Keratinocyte;Keratinocyte;Keratinocyte
chr3	127487165	127487365	Enhancer	MCM2;TPRA1;PODXL2;ABTB1;MGLL;SEC61A1;EEFSEC;RUVBL1	Keratinocyte;Keratinocyte;Keratinocyte;Keratinocyte;Keratinocyte;Keratinocyte;Keratinocyte;Keratinocyte
chr3	135702010	135702210	Enhancer	PPP2R3A;RP11;MSL2;RP11;PCCB	Keratinocyte;Keratinocyte;Keratinocyte;Keratinocyte;Keratinocyte
chr3	142164740	142164940	Enhancer	RP11;XRN1;RP11;TRPC1;RP11	Keratinocyte;Keratinocyte;Keratinocyte;Keratinocyte;Keratinocyte
chr3	142569121	142569321	Enhancer	RP11;PLS1;RP11;PCOLCE2;CHST2;PBX2P1	Keratinocyte;Keratinocyte;Keratinocyte;Keratinocyte;Keratinocyte;Keratinocyte
chr3	154688602	154688802	Enhancer	PABPC1P10	Keratinocyte
chr3	159603935	159604135	Enhancer	IQCJ;SCHIP1	Keratinocyte;Keratinocyte
chr3	167742600	167742800	Enhancer	GOLIM4	HUVEC
chr3	169067094	169067294	Enhancer	RP11;RP11	Keratinocyte;Keratinocyte
chr3	184158930	184159130	Enhancer	EEF1A1P8;HSP90AA5P;EIF2B5;RP11;DVL3;AP2M1;ABCF3;FAM131A;POLR2H;EPHB3;MAGEF1;RP11;VPS8	Keratinocyte;Keratinocyte;Keratinocyte;Keratinocyte;Keratinocyte;Keratinocyte;Keratinocyte;Keratinocyte;Keratinocyte;Keratinocyte;Keratinocyte;Keratinocyte;Keratinocyte
chr3	184483765	184483965	Enhancer	HSP90AA5P;EIF2B5;RP11;AP2M1;ALG3;PSMD2;EIF4G1;FAM131A;CLCN2;POLR2H;CHRD;EIF2B5;EPHB3;MAGEF1	Keratinocyte;Keratinocyte;Keratinocyte;Keratinocyte;Keratinocyte;Keratinocyte;Keratinocyte;Keratinocyte;Keratinocyte;Keratinocyte;Keratinocyte;Keratinocyte;Keratinocyte;Keratinocyte
chr3	189742929	189743129	Enhancer	TP63;MTAPP2;LEPREL1;LEPREL1;CLDN1;CLDN16;IL1RAP	Keratinocyte;Keratinocyte;Keratinocyte;Keratinocyte;Keratinocyte;Keratinocyte;Keratinocyte
chr3	193973296	193973496	Enhancer	HES1;ATP13A3	HUVEC;HUVEC
chr3	194210693	194210893	Enhancer	HES1;GP5;AC046143.7;ATP13A3;AC108676.1;AC046143.5;AC046143.3;TMEM44;LSG1	Keratinocyte;Keratinocyte;Keratinocyte;Keratinocyte;Keratinocyte;Keratinocyte;Keratinocyte;Keratinocyte;Keratinocyte
chr3	197215156	197215356	Enhancer	AC011322.1;AC092937.2;DLG1;AC128709.4;AC128709.2;BDH1;AC024560.3;RP11;FYTTD1;KIAA0226;LRCH3;AC144530.1;RPL35A	Keratinocyte;Keratinocyte;Keratinocyte;Keratinocyte;Keratinocyte;Keratinocyte;Keratinocyte;Keratinocyte;Keratinocyte;Keratinocyte;Keratinocyte;Keratinocyte;Keratinocyte
chr4	5039921	5040121	Enhancer	STK32B	Keratinocyte
chr4	13923546	13923746	Enhancer	BOD1L	Keratinocyte
chr4	37839119	37839319	Enhancer	RP11;PGM2;TBC1D1	HUVEC;HUVEC;HUVEC
chr4	40992567	40992767	Enhancer	APBB2;UCHL1	Keratinocyte;Keratinocyte
chr4	40995000	40995200	Enhancer	APBB2;UCHL1	Keratinocyte;Keratinocyte
chr4	71860500	71860700	Enhancer	UTP3;RUFY3;MOB1B;DCK	Keratinocyte;Keratinocyte;Keratinocyte;Keratinocyte
chr4	80928889	80929089	Enhancer	AC097711.1;ANTXR2;RP11;FGF5	Keratinocyte;Keratinocyte;Keratinocyte;Keratinocyte
chr4	80929071	80929271	Enhancer	AC097711.1;ANTXR2;RP11;FGF5	Keratinocyte;Keratinocyte;Keratinocyte;Keratinocyte
chr4	84674360	84674560	Enhancer	HELQ;MRPS18C	Keratinocyte;Keratinocyte
chr4	141037712	141037912	Enhancer	MGST2;H3F3AP6;MAML3;SCOC;RP11;ELMOD2	Keratinocyte;Keratinocyte;Keratinocyte;Keratinocyte;Keratinocyte;Keratinocyte
chr4	157701049	157701249	Enhancer	PDGFC	Keratinocyte
chr4	157868158	157868358	Enhancer	PDGFC;GLRB	Keratinocyte;Keratinocyte
chr4	159234817	159235017	Enhancer	RP11	Keratinocyte
chr4	160356995	160357195	Enhancer	RP11	Keratinocyte
chr4	177242802	177243002	Enhancer	SPCS3	HUVEC,Keratinocyte
chr4	177824014	177824214	Enhancer	NEIL3	Keratinocyte
chr4	184270369	184270569	Enhancer	WWC2;CLDN22;VTI1BP2;ING2;RWDD4;TRAPPC11	Keratinocyte;Keratinocyte;Keratinocyte;Keratinocyte;Keratinocyte;Keratinocyte
chr4	185714424	185714624	Enhancer	RP11;IRF2;RP11;CASP3;CCDC111;MLF1IP;ACSL1;RP11;SLC25A4	Keratinocyte;Keratinocyte;Keratinocyte;Keratinocyte;Keratinocyte;Keratinocyte;Keratinocyte;Keratinocyte;Keratinocyte
chr5	14154688	14154888	Enhancer	DNAH5;TRIO;FAM105A;CCT6P2;FAM105B;RBBP4P1	Keratinocyte;Keratinocyte;Keratinocyte;Keratinocyte;Keratinocyte;Keratinocyte
chr5	17118658	17118858	Enhancer	CTB;BASP1;CTD;7SK;CTD;FTH1P10	Keratinocyte;Keratinocyte;Keratinocyte;Keratinocyte;Keratinocyte;Keratinocyte
chr5	17224760	17224960	Enhancer	CTB;MYO10;AC091878.1;BASP1;CTD;7SK;CTD;FTH1P10	Keratinocyte;Keratinocyte;Keratinocyte;Keratinocyte;Keratinocyte;Keratinocyte;Keratinocyte;Keratinocyte
chr5	33320065	33320265	Enhancer	RP11;TARS;CTD	Keratinocyte;Keratinocyte;Keratinocyte
chr5	36527054	36527254	Enhancer	NIPBL	Keratinocyte
chr5	37721682	37721882	Enhancer	RP11;U6	HUVEC;HUVEC
chr5	37723076	37723276	Enhancer	RP11;U6	HUVEC;HUVEC
chr5	40682779	40682979	Enhancer	PTGER4	Keratinocyte
chr5	40682848	40683048	Enhancer	PTGER4	Keratinocyte
chr5	57138558	57138758	Enhancer	PLK2	Keratinocyte
chr5	61572795	61572995	Enhancer	KIF2A;DIMT1;IPO11	Keratinocyte;Keratinocyte;Keratinocyte
chr5	64486321	64486521	Enhancer	CTD	Keratinocyte
chr5	67067113	67067313	Enhancer	EEF1B2P2	Keratinocyte
chr5	71643741	71643941	Enhancer	MAP1B;AC026406.1;PTCD2;MRPS27;RPL7P22	Keratinocyte;Keratinocyte;Keratinocyte;Keratinocyte;Keratinocyte
chr5	77826174	77826374	Enhancer	AP3B1;CTD	Keratinocyte;Keratinocyte
chr5	78857150	78857350	Enhancer	RP11;RP11	Keratinocyte;Keratinocyte
chr5	80716163	80716363	Enhancer	ACOT12	Keratinocyte
chr5	100176182	100176382	Enhancer	FAM174A	Keratinocyte
chr5	110293922	110294122	Enhancer	SLC25A46;TMEM232;CTD	Keratinocyte;Keratinocyte;Keratinocyte
chr5	112383521	112383721	Enhancer	APC;SRP19;REEP5;DCP2;CTD	Keratinocyte;Keratinocyte;Keratinocyte;Keratinocyte;Keratinocyte
chr5	112860720	112860920	Enhancer	SRP19;CTD;TSSK1B;MCC;YTHDC2	HUVEC;HUVEC;HUVEC;HUVEC;HUVEC
chr5	115827828	115828028	Enhancer	CTD;RPS17P2	Keratinocyte;Keratinocyte
chr5	130618857	130619057	Enhancer	RP11;RP11;LYRM7;HINT1;CDC42SE2	Keratinocyte;Keratinocyte;Keratinocyte;Keratinocyte;Keratinocyte
chr5	142388555	142388755	Enhancer	RP11;NR3C1	Keratinocyte;Keratinocyte
chr5	148170788	148170988	Enhancer	ADRB2;SH3TC2;CTC;ABLIM3;PCYOX1L	Keratinocyte;Keratinocyte;Keratinocyte;Keratinocyte;Keratinocyte
chr5	148663437	148663637	Enhancer	ADRB2;ABLIM3;AFAP1L1;AC012613.2;GRPEL2;RP11;PCYOX1L;RP11;CTB;RPL29P14;CSNK1A1;ARHGEF37;PPARGC1B;AC008427.2;SLC26A2	Keratinocyte;Keratinocyte;Keratinocyte;Keratinocyte;Keratinocyte;Keratinocyte;Keratinocyte;Keratinocyte;Keratinocyte;Keratinocyte;Keratinocyte;Keratinocyte;Keratinocyte;Keratinocyte;Keratinocyte
chr5	148674515	148674715	Enhancer	ADRB2;AFAP1L1;AC012613.2;GRPEL2;RP11;PCYOX1L;RP11;CTB;RPL29P14;CSNK1A1;ARHGEF37;PPARGC1B;AC008427.2	Keratinocyte;Keratinocyte;Keratinocyte;Keratinocyte;Keratinocyte;Keratinocyte;Keratinocyte;Keratinocyte;Keratinocyte;Keratinocyte;Keratinocyte;Keratinocyte;Keratinocyte
chr5	148679036	148679236	Enhancer	ADRB2;AFAP1L1;AC012613.2;GRPEL2;RP11;PCYOX1L;RP11;IL17B;CTB;RPL29P14;CSNK1A1;ARHGEF37;PPARGC1B;AC008427.2	Keratinocyte;Keratinocyte;Keratinocyte;Keratinocyte;Keratinocyte;Keratinocyte;Keratinocyte;Keratinocyte;Keratinocyte;Keratinocyte;Keratinocyte;Keratinocyte;Keratinocyte;Keratinocyte
chr5	150534682	150534882	Enhancer	ZNF300;ZNF300P1;GPX3;ANXA6;GM2A;CCDC69;SLC36A3;SLC36A2;SLC36A1;FAT2;CTB;CTB;SPARC;RP11;G3BP1;ATOX1	Keratinocyte;Keratinocyte;Keratinocyte;Keratinocyte;Keratinocyte;Keratinocyte;Keratinocyte;Keratinocyte;Keratinocyte;Keratinocyte;Keratinocyte;Keratinocyte;Keratinocyte;Keratinocyte;Keratinocyte;Keratinocyte
chr5	153593884	153594084	Enhancer	GALNT10	Keratinocyte
chr5	156778142	156778342	Enhancer	FNDC9	HUVEC
chr5	167069809	167070009	Enhancer	ODZ2;CTB;CTB;CTC;CTB	Keratinocyte;Keratinocyte;Keratinocyte;Keratinocyte;Keratinocyte
chr5	167157067	167157267	Enhancer	CTB;CTB;CTC;CTB	Keratinocyte;Keratinocyte;Keratinocyte;Keratinocyte
chr5	171411962	171412162	Enhancer	FBXW11;STK10;UBTD2	Keratinocyte;Keratinocyte;Keratinocyte
chr5	171540298	171540498	Enhancer	FBXW11;STK10;EFCAB9;KLF3P1;UBTD2;SH3PXD2B;DUSP1	Keratinocyte;Keratinocyte;Keratinocyte;Keratinocyte;Keratinocyte;Keratinocyte;Keratinocyte
chr5	171612495	171612695	Enhancer	FBXW11;STK10;EFCAB9;UBTD2;SH3PXD2B;RP11;DUSP1;ERGIC1	Keratinocyte;Keratinocyte;Keratinocyte;Keratinocyte;Keratinocyte;Keratinocyte;Keratinocyte;Keratinocyte
chr6	2901612	2901812	Enhancer	WRNIP1;SERPINB9;FAM136BP;TUBB2A;RP1;PSMG4;TUBB2B	Keratinocyte;Keratinocyte;Keratinocyte;Keratinocyte;Keratinocyte;Keratinocyte;Keratinocyte
chr6	4059428	4059628	Enhancer	RP1;RP1;RP3;AL138831.1;RP3;PRPF4B;C6orf201;FAM217A;ECI2;RP3;RP3;RN5S202;CDYL	HUVEC,Keratinocyte;HUVEC,Keratinocyte;HUVEC,Keratinocyte;HUVEC,Keratinocyte;HUVEC,Keratinocyte;HUVEC,Keratinocyte;HUVEC,Keratinocyte;HUVEC,Keratinocyte;HUVEC,Keratinocyte;HUVEC,Keratinocyte;HUVEC,Keratinocyte;HUVEC;Keratinocyte
chr6	4582166	4582366	Enhancer	RP3;PRPF4B;CDYL;RP11;RPP40	Keratinocyte;Keratinocyte;Keratinocyte;Keratinocyte;Keratinocyte
chr6	10382984	10383184	Enhancer	RP3;RP1;TFAP2A;RP1;GCNT2;RP11;PAK1IP1;TMEM14C;TMEM14B;SYCP2L	Keratinocyte;Keratinocyte;Keratinocyte;Keratinocyte;Keratinocyte;Keratinocyte;Keratinocyte;Keratinocyte;Keratinocyte;Keratinocyte
chr6	16695044	16695244	Enhancer	RP1;ATXN1	Keratinocyte;Keratinocyte
chr6	16707705	16707905	Enhancer	RP1;ATXN1	Keratinocyte;Keratinocyte
chr6	16729510	16729710	Enhancer	RP1;ATXN1	Keratinocyte;Keratinocyte
chr6	26442190	26442390	Enhancer	HIST1H3C;HIST1H1C;HFE;HIST1H4C;HIST1H2BC;HIST1H2AC;HIST1H2BD;HIST1H2BE;HIST1H4H;H3F3AP1;BTN3A2;BTN2A2;BTN3A1;BTN2A3P;BTN3A3;BTN2A1;ABT1	Keratinocyte;Keratinocyte;Keratinocyte;Keratinocyte;Keratinocyte;Keratinocyte;Keratinocyte;Keratinocyte;Keratinocyte;Keratinocyte;Keratinocyte;Keratinocyte;Keratinocyte;Keratinocyte;Keratinocyte;Keratinocyte;Keratinocyte
chr6	27107656	27107856	Enhancer	HIST1H2BJ;HIST1H2AG;HIST1H4I;HIST1H2BK;HIST1H2AH	Keratinocyte;Keratinocyte;Keratinocyte;Keratinocyte;Keratinocyte
chr6	37207738	37207938	Enhancer	SRSF3;LAP3P2;CDKN1A;C6orf89;PPIL1;PIM1;TBC1D22B;TMEM217;RNF8;AL096712.1;CCDC167	Keratinocyte;Keratinocyte;Keratinocyte;Keratinocyte;Keratinocyte;Keratinocyte;Keratinocyte;Keratinocyte;Keratinocyte;Keratinocyte;Keratinocyte
chr6	37482999	37483199	Enhancer	COX6A1P2;RP3;PIM1;TBC1D22B;RNF8;AL096712.1;FTSJD2	Keratinocyte;Keratinocyte;Keratinocyte;Keratinocyte;Keratinocyte;Keratinocyte;Keratinocyte
chr6	37590584	37590784	Enhancer	COX6A1P2;PIM1;TBC1D22B;FTSJD2	Keratinocyte;Keratinocyte;Keratinocyte;Keratinocyte
chr6	44003347	44003547	Enhancer	GTPBP2;MAD2L1BP;RP5;TMEM63B;MRPL14;SLC29A1;HSP90AB1;SLC35B2;NFKBIE;AARS2;CDC5L	Keratinocyte;Keratinocyte;Keratinocyte;Keratinocyte;Keratinocyte;Keratinocyte;Keratinocyte;Keratinocyte;Keratinocyte;Keratinocyte;Keratinocyte
chr6	48103377	48103577	Enhancer	HNRNPA3P4	Keratinocyte
chr6	75811619	75811819	Enhancer	COL12A1;COX7A2;TMEM30A;RP1;HMGB1P39;RP11;RP11;FILIP1;RPL26P20	HUVEC;HUVEC;HUVEC;HUVEC;HUVEC;HUVEC;HUVEC;HUVEC;HUVEC
chr6	75811664	75811864	Enhancer	COL12A1;COX7A2;TMEM30A;RP1;HMGB1P39;RP11;RP11;FILIP1;RPL26P20	HUVEC;HUVEC;HUVEC;HUVEC;HUVEC;HUVEC;HUVEC;HUVEC;HUVEC
chr6	75811701	75811901	Enhancer	COL12A1;COX7A2;TMEM30A;RP1;HMGB1P39;RP11;RP11;FILIP1;RPL26P20	HUVEC;HUVEC;HUVEC;HUVEC;HUVEC;HUVEC;HUVEC;HUVEC;HUVEC
chr6	109217265	109217465	Enhancer	SNX3;FOXO3;SUMO2P8;RP11	Keratinocyte;Keratinocyte;Keratinocyte;Keratinocyte
chr6	116833341	116833541	Enhancer	NT5DC1;RP3;TSPYL4;DSE;RP3;TSPYL1;RP1;FAM26E;FAM26D;BET3L;ZUFSP;KPNA5	Keratinocyte;Keratinocyte;Keratinocyte;Keratinocyte;Keratinocyte;Keratinocyte;Keratinocyte;Keratinocyte;Keratinocyte;Keratinocyte;Keratinocyte;Keratinocyte
chr6	134744065	134744265	Enhancer	TBPL1;KRT8P42;RP11;FAM8A6P;RP3	Keratinocyte;Keratinocyte;Keratinocyte;Keratinocyte;Keratinocyte
chr6	138225659	138225859	Enhancer	BTF3L4P3;RP11;RP11;TNFAIP3;RP11;PERP	Keratinocyte;Keratinocyte;Keratinocyte;Keratinocyte;Keratinocyte;Keratinocyte
chr6	138226152	138226352	Enhancer	BTF3L4P3;RP11;RP11;TNFAIP3;RP11;PERP	Keratinocyte;Keratinocyte;Keratinocyte;Keratinocyte;Keratinocyte;Keratinocyte
chr6	142737310	142737510	Enhancer	VTA1;GPR126	HUVEC;HUVEC
chr6	143164238	143164438	Enhancer	RP1;RP1;RP1;RP1	Keratinocyte;Keratinocyte;Keratinocyte;Keratinocyte
chr6	143251173	143251373	Enhancer	RP1;HIVEP2;RP11;RP11;RP1;RP1;FUCA2	Keratinocyte;Keratinocyte;Keratinocyte;Keratinocyte;Keratinocyte;Keratinocyte;Keratinocyte
chr6	151605881	151606081	Enhancer	RP1	Keratinocyte
chr6	158251933	158252133	Enhancer	SNX9;RP11;RP3;SRP72P2	Keratinocyte;Keratinocyte;Keratinocyte;Keratinocyte
chr6	159458049	159458249	Enhancer	TMEM181;TATDN2P2;DYNLT1;SYTL3;TAGAP	Keratinocyte;Keratinocyte;Keratinocyte;Keratinocyte;Keratinocyte
chr6	160404591	160404791	Enhancer	RP1;WTAP;ACAT2;SOD2;TCP1;MRPL18;PNLDC1;IGF2R;RP11;SLC22A1;SLC22A3	Keratinocyte;Keratinocyte;Keratinocyte;Keratinocyte;Keratinocyte;Keratinocyte;Keratinocyte;Keratinocyte;Keratinocyte;Keratinocyte;Keratinocyte
chr6	160758834	160759034	Enhancer	ACAT2;TCP1;MRPL18;IGF2R;RP11	Keratinocyte;Keratinocyte;Keratinocyte;Keratinocyte;Keratinocyte
chr6	166901754	166901954	Enhancer	RPS6KA2;FAM103A2P	HUVEC;HUVEC
chr7	1027890	1028090	Enhancer	ADAP1;COX19;CYP2W1;GPR146;AC091729.7;AC091729.8;GPER;AC091729.9;ZFAND2A	HUVEC;HUVEC;HUVEC;HUVEC;HUVEC;HUVEC;HUVEC;HUVEC;HUVEC
chr7	6323813	6324013	Enhancer	CCZ1;PMS2;AIMP2;DAGLB;KDELR2;GRID2IP;ZDHHC4;AC079742.4;C7orf26;AC073343.9;RP11;AC073343.1;ZNF12;PMS2CL;CCZ1B	Keratinocyte;Keratinocyte;Keratinocyte;Keratinocyte;Keratinocyte;Keratinocyte;Keratinocyte;Keratinocyte;Keratinocyte;Keratinocyte;Keratinocyte;Keratinocyte;Keratinocyte;Keratinocyte;Keratinocyte
chr7	11122902	11123102	Enhancer	NDUFA4	Keratinocyte
chr7	12463009	12463209	Enhancer	ARL4A	Keratinocyte
chr7	19997778	19997978	Enhancer	MACC1;ITGB8	Keratinocyte;Keratinocyte
chr7	27086642	27086842	Enhancer	RPL7AP38;HMGB3P20;NHP2P2;HOXA1;HOXA2	Keratinocyte;Keratinocyte;Keratinocyte;Keratinocyte;Keratinocyte
chr7	28194557	28194757	Enhancer	TAX1BP1;JAZF1;JAZF1	Keratinocyte;Keratinocyte;Keratinocyte
chr7	38255478	38255678	Enhancer	STARD3NL	HUVEC
chr7	39775703	39775903	Enhancer	YAE1D1;AC011290.5;AC004837.3;AC004837.4;RALA;AC004837.5;LINC00265;C7orf10	Keratinocyte;Keratinocyte;Keratinocyte;Keratinocyte;Keratinocyte;Keratinocyte;Keratinocyte;Keratinocyte
chr7	43686789	43686989	Enhancer	STK17A;C7orf44	HUVEC;HUVEC
chr7	73769920	73770120	Enhancer	MIR590;LAT2;RFC2;CLIP2;GTF2IRD1	HUVEC;HUVEC;HUVEC;HUVEC;HUVEC
chr7	96651815	96652015	Enhancer	SHFM1;DLX6;DLX6;DLX5;HMGB3P21;AC073900.4	Keratinocyte;Keratinocyte;Keratinocyte;Keratinocyte;Keratinocyte;Keratinocyte
chr7	96652015	96652215	Enhancer	SHFM1;DLX6;DLX6;DLX5;HMGB3P21;AC073900.4	Keratinocyte;Keratinocyte;Keratinocyte;Keratinocyte;Keratinocyte;Keratinocyte
chr7	96652023	96652223	Enhancer	SHFM1;DLX6;DLX6;DLX5;HMGB3P21;AC073900.4	Keratinocyte;Keratinocyte;Keratinocyte;Keratinocyte;Keratinocyte;Keratinocyte
chr7	96652053	96652253	Enhancer	SHFM1;DLX6;DLX6;DLX5;HMGB3P21;AC073900.4	Keratinocyte;Keratinocyte;Keratinocyte;Keratinocyte;Keratinocyte;Keratinocyte
chr7	107744467	107744667	Enhancer	BCAP29;AC002467.7;CBLL1;DLD;U3;LAMB4;NRCAM;DNAJB9;PNPLA8	HUVEC;HUVEC;HUVEC;HUVEC;HUVEC;HUVEC;HUVEC;HUVEC;HUVEC
chr7	134050302	134050502	Enhancer	BPGM;CALD1	Keratinocyte;Keratinocyte
chr7	134246987	134247187	Enhancer	SLC35B4;AKR1B10;AC009276.4;CALD1;AGBL3;AC083862.6	Keratinocyte;Keratinocyte;Keratinocyte;Keratinocyte;Keratinocyte;Keratinocyte
chr7	135660001	135660201	Enhancer	NUP205;AC093107.7;C7orf73;AC015987.1;AC015987.2;MTPN	Keratinocyte;Keratinocyte;Keratinocyte;Keratinocyte;Keratinocyte;Keratinocyte
chr7	137367241	137367441	Enhancer	AC009245.3;AC024082.3	Keratinocyte;Keratinocyte
chr7	139736056	139736256	Enhancer	PARP12;SLC37A3	Keratinocyte;Keratinocyte
chr8	8946201	8946401	Enhancer	RP11;ERI1;RP11;PPP1R3B	Keratinocyte;Keratinocyte;Keratinocyte;Keratinocyte
chr8	20059914	20060114	Enhancer	INTS10;SLC18A1;ATP6V1B2;LZTS1	Keratinocyte;Keratinocyte;Keratinocyte;Keratinocyte
chr8	22048746	22048946	Enhancer	XPO7;NPM2;EPB49;FAM160B2;AC091171.1;NUDT18;HR;REEP4;LGI3;BMP1;AC105206.1;PHYHIP;POLR3D;CTD;PIWIL2;SLC39A14;PPP3CC;RP11;SORBS3;PDLIM2;C8orf58;KIAA1967	Keratinocyte;Keratinocyte;Keratinocyte;Keratinocyte;Keratinocyte;Keratinocyte;Keratinocyte;Keratinocyte;Keratinocyte;Keratinocyte;Keratinocyte;Keratinocyte;Keratinocyte;Keratinocyte;Keratinocyte;Keratinocyte;Keratinocyte;Keratinocyte;Keratinocyte;Keratinocyte;Keratinocyte;Keratinocyte
chr8	25056460	25056660	Enhancer	DOCK5;KCTD9;CDCA2	Keratinocyte;Keratinocyte;Keratinocyte
chr8	25077689	25077889	Enhancer	DOCK5;CDCA2	Keratinocyte;Keratinocyte
chr8	26297967	26298167	Enhancer	PPP2R2A;BNIP3L;SDAD1P1;RP11;RP11;DPYSL2;PNMA2;RP11	Keratinocyte;Keratinocyte;Keratinocyte;Keratinocyte;Keratinocyte;Keratinocyte;Keratinocyte;Keratinocyte
chr8	30513608	30513808	Enhancer	MAP2K1P1;TMEM66;LEPROTL1;RPS15AP24;CTD;TUBBP1;CTD;GS1;GTF2E2;GSR;UBXN8;PPP2CB;RP5;RP11;WRN	Keratinocyte;Keratinocyte;Keratinocyte;Keratinocyte;Keratinocyte;Keratinocyte;Keratinocyte;Keratinocyte;Keratinocyte;Keratinocyte;Keratinocyte;Keratinocyte;Keratinocyte;Keratinocyte;Keratinocyte
chr8	38262805	38263005	Enhancer	EIF4EBP1;ASH2L;RP11;STAR;BAG4;LSM1;DDHD2;PPAPDC1B;RP11;RP11;WHSC1L1;LETM2;RP11;RP11;RPS20P22;FGFR1;C8orf86;RNF5P1	HUVEC,Keratinocyte;HUVEC,Keratinocyte;HUVEC,Keratinocyte;HUVEC;HUVEC;HUVEC;HUVEC,Keratinocyte;HUVEC,Keratinocyte;HUVEC,Keratinocyte;HUVEC,Keratinocyte;HUVEC,Keratinocyte;HUVEC,Keratinocyte;HUVEC,Keratinocyte;HUVEC,Keratinocyte;HUVEC;HUVEC;HUVEC;HUVEC
chr8	38970673	38970873	Enhancer	RNF5P1;TACC1;PLEKHA2;CTD;HTRA4;TM2D2;ADAM9;ADAM32	Keratinocyte;Keratinocyte;Keratinocyte;Keratinocyte;Keratinocyte;Keratinocyte;Keratinocyte;Keratinocyte
chr8	42053764	42053964	Enhancer	AP3M2;PLAT;POLB;RP11;DKK4;VDAC3;RP11;C8orf40;SLC20A2	Keratinocyte;Keratinocyte;Keratinocyte;Keratinocyte;Keratinocyte;Keratinocyte;Keratinocyte;Keratinocyte;Keratinocyte
chr8	49194307	49194507	Enhancer	PRKDC;MCM4;SNAI2	Keratinocyte;Keratinocyte;Keratinocyte
chr8	49540170	49540370	Enhancer	RPL29P19;RP11;RP11;SNAI2	Keratinocyte;Keratinocyte;Keratinocyte;Keratinocyte
chr8	55066217	55066417	Enhancer	RP11;TDGF1P5;LYPLA1;MRPL15	Keratinocyte;Keratinocyte;Keratinocyte;Keratinocyte
chr8	56860955	56861155	Enhancer	TGS1;TMEM68;LYN;RP11;RPS20;CTA;NPM1P21;CHCHD7;SDR16C5	Keratinocyte;Keratinocyte;Keratinocyte;Keratinocyte;Keratinocyte;Keratinocyte;Keratinocyte;Keratinocyte;Keratinocyte
chr8	75494268	75494468	Enhancer	RP11	Keratinocyte
chr8	87535589	87535789	Enhancer	WWP1;CTD;CPNE3;CTD;FAM82B	Keratinocyte;Keratinocyte;Keratinocyte;Keratinocyte;Keratinocyte
chr8	90794547	90794747	Enhancer	RP11;RIPK2;NBN	Keratinocyte;Keratinocyte;Keratinocyte
chr8	103299594	103299794	Enhancer	NCALD;RRM2B;KB;KB;UBR5;KLF10	HUVEC;HUVEC;HUVEC;HUVEC;HUVEC;HUVEC
chr8	117363682	117363882	Enhancer	UTP23;EIF3H	Keratinocyte;Keratinocyte
chr8	126203962	126204162	Enhancer	NDUFB9;TATDN1;RP11;RP11;RP11;ZNF572;SQLE;KIAA0196;NSMCE2;KIAA0196;TRIB1	Keratinocyte;Keratinocyte;Keratinocyte;Keratinocyte;Keratinocyte;Keratinocyte;Keratinocyte;Keratinocyte;Keratinocyte;Keratinocyte;Keratinocyte
chr8	129195690	129195890	Enhancer	MYC;PVT1;U1;U4	Keratinocyte;Keratinocyte;Keratinocyte;Keratinocyte
chr8	130472065	130472265	Enhancer	GSDMC	Keratinocyte
chr8	131012140	131012340	Enhancer	GSDMC;RP11;FAM49B	Keratinocyte;Keratinocyte;Keratinocyte
chr9	5494248	5494448	Enhancer	CD274;KIAA1432;ERMP1	Keratinocyte;Keratinocyte;Keratinocyte
chr9	16704304	16704504	Enhancer	RP11	Keratinocyte
chr9	33143252	33143452	Enhancer	ASS1P12;TCEA1P;RP11;APTX;DNAJA1;SMU1;RP11;B4GALT1;BAG1;CHMP5;NFX1;AQP3;NOL6;SNX18P7;ANXA2P2	Keratinocyte;Keratinocyte;Keratinocyte;Keratinocyte;Keratinocyte;Keratinocyte;Keratinocyte;Keratinocyte;Keratinocyte;Keratinocyte;Keratinocyte;Keratinocyte;Keratinocyte;Keratinocyte;Keratinocyte
chr9	36150673	36150873	Enhancer	HINT2;RP11;YBX1P10;RP11;RECK;GLIPR2;CCIN;CLTA;HMGB3P24	HUVEC;HUVEC;HUVEC;HUVEC;HUVEC;HUVEC;HUVEC;HUVEC;HUVEC
chr9	79481468	79481668	Enhancer	VPS13A;RP11	Keratinocyte;Keratinocyte
chr9	80524174	80524374	Enhancer	RP11;GNAQ;RP11;RP11;RP11;RP11;CEP78;PSAT1	Keratinocyte;Keratinocyte;Keratinocyte;Keratinocyte;Keratinocyte;Keratinocyte;Keratinocyte;Keratinocyte
chr9	80524271	80524471	Enhancer	RP11;GNAQ;RP11;RP11;RP11;RP11;CEP78;PSAT1	Keratinocyte;Keratinocyte;Keratinocyte;Keratinocyte;Keratinocyte;Keratinocyte;Keratinocyte;Keratinocyte
chr9	99327774	99327974	Enhancer	HABP4;CDC14B	Keratinocyte;Keratinocyte
chr9	101820291	101820491	Enhancer	ALG2;SEC61B;KRT8P11	Keratinocyte;Keratinocyte;Keratinocyte
chr9	101821469	101821669	Enhancer	ALG2;SEC61B;KRT8P11	Keratinocyte;Keratinocyte;Keratinocyte
chr9	101881528	101881728	Enhancer	TGFBR1;ALG2;SEC61B;KRT8P11	Keratinocyte;Keratinocyte;Keratinocyte;Keratinocyte
chr9	109975975	109976175	Enhancer	RP11;ZNF462;RP11;HMGN2P32;KLF4	Keratinocyte;Keratinocyte;Keratinocyte;Keratinocyte;Keratinocyte
chr9	110310828	110311028	Enhancer	ZNF462;RP11;RP11;RAD23B	Keratinocyte;Keratinocyte;Keratinocyte;Keratinocyte
chr9	110310941	110311141	Enhancer	ZNF462;RP11;RP11;RAD23B	Keratinocyte;Keratinocyte;Keratinocyte;Keratinocyte
chr9	114688637	114688837	Enhancer	UGCG;KIAA0368	HUVEC;HUVEC
chr9	115950706	115950906	Enhancer	ZNF883;ZFP37;SLC31A2;FKBP15;SLC31A1;PRPF4;CDC26;WDR31;BSPRY;HDHD3;POLE3;RGS3	Keratinocyte;Keratinocyte;Keratinocyte;Keratinocyte;Keratinocyte;Keratinocyte;Keratinocyte;Keratinocyte;Keratinocyte;Keratinocyte;Keratinocyte;Keratinocyte
chr9	124218286	124218486	Enhancer	GSN;RAB14;RP11;GSN;GGTA1P	HUVEC;HUVEC;HUVEC;HUVEC;HUVEC
chr9	132758459	132758659	Enhancer	METTL11A;AL590369.1;GPR107;RP11;NCS1	Keratinocyte;Keratinocyte;Keratinocyte;Keratinocyte;Keratinocyte
chr9	132803408	132803608	Enhancer	ASB6;AL590369.1;FNBP1;GPR107;NCS1	Keratinocyte;Keratinocyte;Keratinocyte;Keratinocyte;Keratinocyte
chr9	133412980	133413180	Enhancer	ASS1;ABL1;RP11	Keratinocyte;Keratinocyte;Keratinocyte
chr9	133412995	133413195	Enhancer	ASS1;ABL1;RP11	Keratinocyte;Keratinocyte;Keratinocyte
chr10	5333587	5333787	Enhancer	AKR1C1;RP11;CALML5;CALML3;RP11;RP13;RP11;ASB13;FAM208B;GDI2;FBXO18	Keratinocyte;Keratinocyte;Keratinocyte;Keratinocyte;Keratinocyte;Keratinocyte;Keratinocyte;Keratinocyte;Keratinocyte;Keratinocyte;Keratinocyte
chr10	6342169	6342369	Enhancer	GDI2;FBXO18;RP11;RBM17;PFKFB3;7SK;AL137145.2;RP11;RP11	Keratinocyte;Keratinocyte;Keratinocyte;Keratinocyte;Keratinocyte;Keratinocyte;Keratinocyte;Keratinocyte;Keratinocyte
chr10	23801788	23801988	Enhancer	MSRB2;YWHAZP3	Keratinocyte;Keratinocyte
chr10	30072163	30072363	Enhancer	RP11;RP11	Keratinocyte;Keratinocyte
chr10	30092934	30093134	Enhancer	RP11;RP11	Keratinocyte;Keratinocyte
chr10	32702484	32702684	Enhancer	KIF5B;RP11;RP11;RP11;RP11;RP11;C1DP1	Keratinocyte;Keratinocyte;Keratinocyte;Keratinocyte;Keratinocyte;Keratinocyte;Keratinocyte
chr10	32702763	32702963	Enhancer	KIF5B;RP11;RP11;RP11;RP11;RP11;C1DP1	Keratinocyte;Keratinocyte;Keratinocyte;Keratinocyte;Keratinocyte;Keratinocyte;Keratinocyte
chr10	35417063	35417263	Enhancer	RP11;CUL2;CREM	Keratinocyte;Keratinocyte;Keratinocyte
chr10	63701152	63701352	Enhancer	ARID5B	Keratinocyte
chr10	69914113	69914313	Enhancer	RP11;HERC4	Keratinocyte;Keratinocyte
chr10	70426306	70426506	Enhancer	HNRNPH3;RP11;RP11;RP11;RP11;DDX21;KIAA1279	Keratinocyte;Keratinocyte;Keratinocyte;Keratinocyte;Keratinocyte;Keratinocyte;Keratinocyte
chr10	73592858	73593058	Enhancer	C10orf105;C10orf54;PSAP;CHST3;RP11;ANAPC16;ASCC1	Keratinocyte;Keratinocyte;Keratinocyte;Keratinocyte;Keratinocyte;Keratinocyte;Keratinocyte
chr10	79110934	79111134	Enhancer	RP11	Keratinocyte
chr10	79115572	79115772	Enhancer	RP11	Keratinocyte
chr10	89870687	89870887	Enhancer	ATAD1;PTEN;RP11	Keratinocyte;Keratinocyte;Keratinocyte
chr10	91275234	91275434	Enhancer	RP11;IFIT2;IFIT3	Keratinocyte;Keratinocyte;Keratinocyte
chr10	102831354	102831554	Enhancer	SEMA4G;RP11;C10orf2;MRPL43;LZTS2;PDZD7;SFXN3;KAZALD1;U2	Keratinocyte;Keratinocyte;Keratinocyte;Keratinocyte;Keratinocyte;Keratinocyte;Keratinocyte;Keratinocyte;Keratinocyte
chr10	105523655	105523855	Enhancer	TAF5;USMG5;PDCD11;NEURL;SH3PXD2A;RP11;OBFC1;SLK;COL17A1;SFR1;GSTO1;GSTO2;RP11;ITPRIP;CCDC147	Keratinocyte;Keratinocyte;Keratinocyte;Keratinocyte;Keratinocyte;Keratinocyte;Keratinocyte;Keratinocyte;Keratinocyte;Keratinocyte;Keratinocyte;Keratinocyte;Keratinocyte;Keratinocyte;Keratinocyte
chr10	118706838	118707038	Enhancer	HSPA12A;RP11;ENO4;RP11;RP11;RP11;KIAA1598;RP11	Keratinocyte;Keratinocyte;Keratinocyte;Keratinocyte;Keratinocyte;Keratinocyte;Keratinocyte;Keratinocyte
chr10	119122674	119122874	Enhancer	RP11;RP11;PDZD8;CTA	Keratinocyte;Keratinocyte;Keratinocyte;Keratinocyte
chr10	120489194	120489394	Enhancer	C10orf46	HUVEC
chr10	124233746	124233946	Enhancer	BTBD16;PLEKHA1;ARMS2;HTRA1;DMBT1	Keratinocyte;Keratinocyte;Keratinocyte;Keratinocyte;Keratinocyte
chr10	124234072	124234272	Enhancer	BTBD16;PLEKHA1;ARMS2;HTRA1;DMBT1	Keratinocyte;Keratinocyte;Keratinocyte;Keratinocyte;Keratinocyte
chr10	126136829	126137029	Enhancer	OAT;NKX1;LHPP	Keratinocyte;Keratinocyte;Keratinocyte
chr10	129789329	129789529	Enhancer	PTPRE;MKI67	Keratinocyte;Keratinocyte
chr10	134479555	134479755	Enhancer	STK32C;LRRC27;PWWP2B;INPP5A	Keratinocyte;Keratinocyte;Keratinocyte;Keratinocyte
chr11	11610642	11610842	Enhancer	RP11;CSNK2A1P;RP11;GALNTL4;DKK3;MICAL2	Keratinocyte;Keratinocyte;Keratinocyte;Keratinocyte;Keratinocyte;Keratinocyte
chr11	35954452	35954652	Enhancer	AC090625.1;PAMR1;FJX1;TRIM44;RP11;LDLRAD3;RP5;RP5;COMMD9;PRR5L	Keratinocyte;Keratinocyte;Keratinocyte;Keratinocyte;Keratinocyte;Keratinocyte;Keratinocyte;Keratinocyte;Keratinocyte;Keratinocyte
chr11	36382408	36382608	Enhancer	LDLRAD3;C11orf55;COMMD9;PRR5L;RP11;TRAF6;RAG1;RAG2	Keratinocyte;Keratinocyte;Keratinocyte;Keratinocyte;Keratinocyte;Keratinocyte;Keratinocyte;Keratinocyte
chr11	63974760	63974960	Enhancer	RCOR2;NAA40;COX8A;STIP1;FERMT3;NUDT22;TRPT1;DNAJC4;RP11;VEGFB;FKBP2;RP11;PPP1R14B;RP11;PLCB3;GPR137;BAD;KCNK4;RP11;C11orf20;ESRRA;TRMT112;PRDX5;AP003774.1;CCDC88B;RPS6KA4	HUVEC;HUVEC;HUVEC;HUVEC;HUVEC;HUVEC;HUVEC;HUVEC;HUVEC;HUVEC;HUVEC;HUVEC;HUVEC;HUVEC;HUVEC;HUVEC;HUVEC;HUVEC;HUVEC;HUVEC;HUVEC;HUVEC;HUVEC;HUVEC;HUVEC;HUVEC
chr11	67251577	67251777	Enhancer	AP003419.16;CORO1B;TMEM134;AIP;PITPNM1;CDK2AP2;GSTP1;RP11;C11orf72;NDUFV1;DOC2GP;RP11;RPL37P2	HUVEC;HUVEC;HUVEC;HUVEC;HUVEC;HUVEC;HUVEC;HUVEC;HUVEC;HUVEC;HUVEC;HUVEC;HUVEC
chr11	69065233	69065433	Enhancer	MYEOV;AP005232.1	Keratinocyte;Keratinocyte
chr11	69065342	69065542	Enhancer	MYEOV;AP005232.1	Keratinocyte;Keratinocyte
chr11	85775463	85775663	Enhancer	TMEM126B;TMEM126A;CREBZF;RP11;PICALM;FNTAL1;EED;RP11;C11orf73	Keratinocyte;Keratinocyte;Keratinocyte;Keratinocyte;Keratinocyte;Keratinocyte;Keratinocyte;Keratinocyte;Keratinocyte
chr11	114168661	114168861	Enhancer	ZBTB16;NNMT;C11orf71;REXO2;RP11;RP11	HUVEC;HUVEC;HUVEC;HUVEC;HUVEC;HUVEC
chr11	114168664	114168864	Enhancer	ZBTB16;NNMT;C11orf71;REXO2;RP11;RP11	HUVEC;HUVEC;HUVEC;HUVEC;HUVEC;HUVEC
chr11	116857694	116857894	Enhancer	AP000936.1;TAGLN;PCSK7;RNF214;CEP164;BACE1	Keratinocyte;Keratinocyte;Keratinocyte;Keratinocyte;Keratinocyte;Keratinocyte
chr11	117693962	117694162	Enhancer	RP11;FXYD2;RP11	HUVEC;HUVEC;HUVEC
chr11	118013414	118013614	Enhancer	SCN4B;SCN2B;MPZL2;ATP5L;RP11;MLL;TMEM25;RP11;RPL5P30;ARCN1;IFT46	Keratinocyte;Keratinocyte;Keratinocyte;Keratinocyte;Keratinocyte;Keratinocyte;Keratinocyte;Keratinocyte;Keratinocyte;Keratinocyte;Keratinocyte
chr11	122057620	122057820	Enhancer	RP11;RP11	Keratinocyte;Keratinocyte
chr11	122648956	122649156	Enhancer	CRTAM;C11orf63;U4;ATP5F1P5;RP11;RPL34P23;SNORD14E;SNORD14D;HSPA8;CLMP	HUVEC;HUVEC;HUVEC;HUVEC;HUVEC;HUVEC;HUVEC;HUVEC;HUVEC;HUVEC
chr11	124750255	124750455	Enhancer	TBRG1;RN5S352;SPA17;SIAE;NRGN;RP11;VSIG2;RP11;ESAM;RP11;MSANTD2;RP11;ROBO3;RP11;RP11;ROBO4;HEPACAM;CCDC15;SLC37A2;AP001007.1;TMEM218;RP11	HUVEC;HUVEC;HUVEC;HUVEC;HUVEC;HUVEC;HUVEC;HUVEC;HUVEC;HUVEC;HUVEC;HUVEC;HUVEC;HUVEC;HUVEC;HUVEC;HUVEC;HUVEC;HUVEC;HUVEC;HUVEC;HUVEC
chr11	126175660	126175860	Enhancer	NAP1L1P1;RP11;FAM118B;RPUSD4;FOXRED1;SRPR;TIRAP;RP11;DCPS;ST3GAL4	Keratinocyte;Keratinocyte;Keratinocyte;Keratinocyte;Keratinocyte;Keratinocyte;Keratinocyte;Keratinocyte;Keratinocyte;Keratinocyte
chr11	128065059	128065259	Enhancer	RP11;ETS1	Keratinocyte;Keratinocyte
chr11	128370575	128370775	Enhancer	RP11;ETS1	Keratinocyte;Keratinocyte
chr11	128373680	128373880	Enhancer	RP11;ETS1;C11orf45	Keratinocyte;Keratinocyte;Keratinocyte
chr11	128382684	128382884	Enhancer	RP11;ETS1;C11orf45	Keratinocyte;Keratinocyte;Keratinocyte
chr11	129781396	129781596	Enhancer	NFRKB	HUVEC
chr12	14553007	14553207	Enhancer	ATF7IP	Keratinocyte
chr12	15102130	15102330	Enhancer	RP11;HIST4H4;H2AFJ;WBP11;C12orf60;C12orf69;RP11;ART4;MGP;ERP27;ARHGDIB	HUVEC;HUVEC;HUVEC;HUVEC;HUVEC;HUVEC;HUVEC;HUVEC;HUVEC;HUVEC;HUVEC
chr12	18849620	18849820	Enhancer	PSMC1P9;PLCZ1;CAPZA3	Keratinocyte;Keratinocyte;Keratinocyte
chr12	19249006	19249206	Enhancer	RP11;RP11;AC092828.1;AEBP2;RP11;RP11;RP11	Keratinocyte;Keratinocyte;Keratinocyte;Keratinocyte;Keratinocyte;Keratinocyte;Keratinocyte
chr12	25205746	25205946	Enhancer	LRMP	Keratinocyte
chr12	40602592	40602792	Enhancer	LRRK2	Keratinocyte
chr12	46616564	46616764	Enhancer	SCAF11;SLC38A1;SLC38A2;RP11;RP11	Keratinocyte;Keratinocyte;Keratinocyte;Keratinocyte;Keratinocyte
chr12	47479695	47479895	Enhancer	FAM113B;AMIGO2;RP11;RP11	Keratinocyte;Keratinocyte;Keratinocyte;Keratinocyte
chr12	47665130	47665330	Enhancer	FAM113B;AMIGO2;RP11;RP11;RP11;RP11;RP3	Keratinocyte;Keratinocyte;Keratinocyte;Keratinocyte;Keratinocyte;Keratinocyte;Keratinocyte
chr12	50606000	50606200	Enhancer	BCDIN3D;RP11;RACGAP1;ASIC1;SMARCD1;GPD1;COX14;orphan;CERS5;RP3;RP3;LIMA1;RP11;LARP4;FAM186A;DIP2B	Keratinocyte;Keratinocyte;Keratinocyte;Keratinocyte;Keratinocyte;Keratinocyte;Keratinocyte;Keratinocyte;Keratinocyte;Keratinocyte;Keratinocyte;Keratinocyte;Keratinocyte;Keratinocyte;Keratinocyte;Keratinocyte
chr12	54359612	54359812	Enhancer	HOXC;HOXC5;HOXC6;HOXC9;HOXC;HOXC;HOXC4;COPZ1;ITGA5	HUVEC;HUVEC;HUVEC;HUVEC;HUVEC;HUVEC;HUVEC;HUVEC;HUVEC
chr12	54359697	54359897	Enhancer	HOXC;HOXC5;HOXC6;HOXC9;HOXC;HOXC;HOXC4;COPZ1;ITGA5	HUVEC;HUVEC;HUVEC;HUVEC;HUVEC;HUVEC;HUVEC;HUVEC;HUVEC
chr12	54359699	54359899	Enhancer	HOXC;HOXC5;HOXC6;HOXC9;HOXC;HOXC;HOXC4;COPZ1;ITGA5	HUVEC;HUVEC;HUVEC;HUVEC;HUVEC;HUVEC;HUVEC;HUVEC;HUVEC
chr12	54360031	54360231	Enhancer	HOXC;HOXC6;HOXC9;HOXC;HOXC;HOXC8;HOXC4;RP11;SMUG1	HUVEC;HUVEC;HUVEC;HUVEC;HUVEC;HUVEC;HUVEC;HUVEC;HUVEC
chr12	54360162	54360362	Enhancer	HOXC;HOXC6;HOXC9;HOXC;HOXC;HOXC8;HOXC4;RP11;SMUG1	HUVEC;HUVEC;HUVEC;HUVEC;HUVEC;HUVEC;HUVEC;HUVEC;HUVEC
chr12	54360360	54360560	Enhancer	HOXC;HOXC6;HOXC9;HOXC;HOXC;HOXC8;HOXC4;RP11;SMUG1	HUVEC;HUVEC;HUVEC;HUVEC;HUVEC;HUVEC;HUVEC;HUVEC;HUVEC
chr12	54360380	54360580	Enhancer	HOXC;HOXC6;HOXC9;HOXC;HOXC;HOXC8;HOXC4;RP11;SMUG1	HUVEC;HUVEC;HUVEC;HUVEC;HUVEC;HUVEC;HUVEC;HUVEC;HUVEC
chr12	54361016	54361216	Enhancer	HOXC;HOXC6;HOXC9;HOXC;HOXC;HOXC8;HOXC4;RP11;SMUG1	HUVEC;HUVEC;HUVEC;HUVEC;HUVEC;HUVEC;HUVEC;HUVEC;HUVEC
chr12	54807295	54807495	Enhancer	RP11;SMUG1;RP11;CBX5;HNRNPA1;NFE2;COPZ1;RP11;RP11;GPR84;ZNF385A;ITGA5	Keratinocyte;Keratinocyte;Keratinocyte;Keratinocyte;Keratinocyte;Keratinocyte;Keratinocyte;Keratinocyte;Keratinocyte;Keratinocyte;Keratinocyte;Keratinocyte
chr12	64310333	64310533	Enhancer	TMEM5;RP11;RP11;RP11;SRGAP1;RPL36AP41;RP11;RP11;XPOT	Keratinocyte;Keratinocyte;Keratinocyte;Keratinocyte;Keratinocyte;Keratinocyte;Keratinocyte;Keratinocyte;Keratinocyte
chr12	64680348	64680548	Enhancer	RP11;RP11;TBK1;RASSF3	HUVEC;HUVEC;HUVEC;HUVEC
chr12	69660284	69660484	Enhancer	CPSF6;RP11;YEATS4	HUVEC;HUVEC;HUVEC
chr12	88693446	88693646	Enhancer	C12orf29	Keratinocyte
chr12	91332223	91332423	Enhancer	RP11	Keratinocyte
chr12	91332379	91332579	Enhancer	RP11	Keratinocyte
chr12	95038625	95038825	Enhancer	RBMS2P1;CCDC41;RP11;RP11;RP11;TMCC3;NDUFA12;VEZT	Keratinocyte;Keratinocyte;Keratinocyte;Keratinocyte;Keratinocyte;Keratinocyte;Keratinocyte;Keratinocyte
chr12	96177424	96177624	Enhancer	METAP2;USP44;PGAM1P5;NTN4;U6;RP11;SNRPF;CCDC38;LTA4H;ELK3	HUVEC;HUVEC;HUVEC;HUVEC;HUVEC;HUVEC;HUVEC;HUVEC;HUVEC;HUVEC
chr12	96591998	96592198	Enhancer	ELK3;RP11;RP11;7SK;C12orf55	Keratinocyte;Keratinocyte;Keratinocyte;Keratinocyte;Keratinocyte
chr12	96839447	96839647	Enhancer	LTA4H;ELK3;RP11;RP11;CDK17;7SK	Keratinocyte;Keratinocyte;Keratinocyte;Keratinocyte;Keratinocyte;Keratinocyte
chr12	96839859	96840059	Enhancer	LTA4H;ELK3;RP11;RP11;CDK17;7SK	Keratinocyte;Keratinocyte;Keratinocyte;Keratinocyte;Keratinocyte;Keratinocyte
chr12	118744917	118745117	Enhancer	RFC5;WSB2;PEBP1;VSIG10;RPS2P5;TAOK3;SUDS3	Keratinocyte;Keratinocyte;Keratinocyte;Keratinocyte;Keratinocyte;Keratinocyte;Keratinocyte
chr12	118745038	118745238	Enhancer	RFC5;WSB2;PEBP1;VSIG10;RPS2P5;TAOK3;SUDS3	Keratinocyte;Keratinocyte;Keratinocyte;Keratinocyte;Keratinocyte;Keratinocyte;Keratinocyte
chr12	118796689	118796889	Enhancer	RFC5;WSB2;PEBP1;VSIG10;RPS2P5;TAOK3;SUDS3	Keratinocyte;Keratinocyte;Keratinocyte;Keratinocyte;Keratinocyte;Keratinocyte;Keratinocyte
chr12	118797425	118797625	Enhancer	RFC5;WSB2;PEBP1;VSIG10;RPS2P5;TAOK3;SUDS3	Keratinocyte;Keratinocyte;Keratinocyte;Keratinocyte;Keratinocyte;Keratinocyte;Keratinocyte
chr12	120111387	120111587	Enhancer	PRKAB1;RP11;RP1;CIT	HUVEC;HUVEC;HUVEC;HUVEC
chr12	123509572	123509772	Enhancer	HIP1R;RP11;VPS37B;OGFOD2;RP11;ARL6IP4;ABCB9	HUVEC;HUVEC;HUVEC;HUVEC;HUVEC;HUVEC;HUVEC
chr12	123762834	123763034	Enhancer	PITPNM2;RP11;CDK2AP1	HUVEC;HUVEC;HUVEC
chr13	24845528	24845728	Enhancer	C1QTNF9;PARP4;PSPC1P2	Keratinocyte;Keratinocyte;Keratinocyte
chr13	41187706	41187906	Enhancer	RLIMP1	Keratinocyte
chr13	41187826	41188026	Enhancer	RLIMP1	Keratinocyte
chr13	43565299	43565499	Enhancer	ZDHHC4P1;EPSTI1;DNAJC15	Keratinocyte;Keratinocyte;Keratinocyte
chr13	45285050	45285250	Enhancer	GTF2F2;TPT1	Keratinocyte;Keratinocyte
chr13	52197767	52197967	Enhancer	INTS6;RPS4XP16;AL354820.1;WDFY2;AL139183.1;DHRS12;CTAGE3P;FABP5P2;ALG11;UTP14C	Keratinocyte;Keratinocyte;Keratinocyte;Keratinocyte;Keratinocyte;Keratinocyte;Keratinocyte;Keratinocyte;Keratinocyte;Keratinocyte
chr13	75900418	75900618	Enhancer	TBC1D4;COMMD6;UCHL3	HUVEC;HUVEC;HUVEC
chr13	98039444	98039644	Enhancer	MBNL2;RAP2A	Keratinocyte;Keratinocyte
chr13	99562786	99562986	Enhancer	STK24;NUS1P4;CALM2P4;SLC15A1;DOCK9;RPL7L1P12;DOCK9;RP11;AL391122.1;GAPDHP22;UBAC2;UBAC2;RN7SKP9;H2AFZP3;GPR18;GPR183;TM9SF2	Keratinocyte;Keratinocyte;Keratinocyte;Keratinocyte;Keratinocyte;Keratinocyte;Keratinocyte;Keratinocyte;Keratinocyte;Keratinocyte;Keratinocyte;Keratinocyte;Keratinocyte;Keratinocyte;Keratinocyte;Keratinocyte;Keratinocyte
chr13	100033281	100033481	Enhancer	RPL7L1P12;DOCK9;AL391122.1;GAPDHP22;UBAC2;UBAC2;RN7SKP9;H2AFZP3;GPR18;GPR183;LINC00449;TM9SF2	Keratinocyte;Keratinocyte;Keratinocyte;Keratinocyte;Keratinocyte;Keratinocyte;Keratinocyte;Keratinocyte;Keratinocyte;Keratinocyte;Keratinocyte;Keratinocyte
chr13	106756590	106756790	Enhancer	EFNB2;ATP5G1P5	Keratinocyte;Keratinocyte
chr13	107160326	107160526	Enhancer	LINC00460;EFNB2;ARGLU1;ATP5G1P5	Keratinocyte;Keratinocyte;Keratinocyte;Keratinocyte
chr13	114016040	114016240	Enhancer	CUL4A;PCID2;LDHBP1;LAMP1;GRTP1;GRTP1	Keratinocyte;Keratinocyte;Keratinocyte;Keratinocyte;Keratinocyte;Keratinocyte
chr13	114831450	114831650	Enhancer	TFDP1;FAM70B;GAS6;GAS6;UPF3A;CHAMP1	Keratinocyte;Keratinocyte;Keratinocyte;Keratinocyte;Keratinocyte;Keratinocyte
chr14	25142740	25142940	Enhancer	CHMP4A;NEDD8;TINF2	Keratinocyte;Keratinocyte;Keratinocyte
chr14	61790835	61791035	Enhancer	RP11;TMEM30B;HIF1A;RP11;RP11;SNAPC1	Keratinocyte;Keratinocyte;Keratinocyte;Keratinocyte;Keratinocyte;Keratinocyte
chr14	61809218	61809418	Enhancer	RP11;TRMT5;PRKCH;TMEM30B;RP11;HIF1A;RP11;SNAPC1	Keratinocyte;Keratinocyte;Keratinocyte;Keratinocyte;Keratinocyte;Keratinocyte;Keratinocyte;Keratinocyte
chr14	61946003	61946203	Enhancer	RP11;PRKCH;TMEM30B;RP11;RP11;RP11;RP11;RP11;HIF1A;RP11;RP11;RP11;SNAPC1;CTD	Keratinocyte;Keratinocyte;Keratinocyte;Keratinocyte;Keratinocyte;Keratinocyte;Keratinocyte;Keratinocyte;Keratinocyte;Keratinocyte;Keratinocyte;Keratinocyte;Keratinocyte;Keratinocyte
chr14	62128958	62129158	Enhancer	TMEM30B;RP11;RP11;RP11;HIF1A;RP11;SNAPC1;CTD;RP11;RP11	Keratinocyte;Keratinocyte;Keratinocyte;Keratinocyte;Keratinocyte;Keratinocyte;Keratinocyte;Keratinocyte;Keratinocyte;Keratinocyte
chr14	65758817	65759017	Enhancer	PLEKHG3;SPTB;CHURC1;CHURC1;GPX2;FNTB;MAX;CTD;CTD;RP11;RP11	Keratinocyte;Keratinocyte;Keratinocyte;Keratinocyte;Keratinocyte;Keratinocyte;Keratinocyte;Keratinocyte;Keratinocyte;Keratinocyte;Keratinocyte
chr14	70478867	70479067	Enhancer	SLC39A9;ERH;KIAA0247;SRSF5;SMOC1;RPL7AP6	Keratinocyte;Keratinocyte;Keratinocyte;Keratinocyte;Keratinocyte;Keratinocyte
chr14	78055478	78055678	Enhancer	SPTLC2;CTD;ALKBH1;SLIRP;C14orf178;SNW1;ADCK1	Keratinocyte;Keratinocyte;Keratinocyte;Keratinocyte;Keratinocyte;Keratinocyte;Keratinocyte
chr14	94679394	94679594	Enhancer	OTUB2;DDX24;IFI27L1;IFI27;IFI27L2;RP11;RPSAP4	Keratinocyte;Keratinocyte;Keratinocyte;Keratinocyte;Keratinocyte;Keratinocyte;Keratinocyte
chr14	99720109	99720309	Enhancer	RPL3P4;AL162151.3;BCL11B;CCDC85C	Keratinocyte;Keratinocyte;Keratinocyte;Keratinocyte
chr14	100613592	100613792	Enhancer	EVL;DEGS2;RP11;AL157871.2;SLC25A29;RP11;RP11;WARS	Keratinocyte;Keratinocyte;Keratinocyte;Keratinocyte;Keratinocyte;Keratinocyte;Keratinocyte;Keratinocyte
chr14	104400043	104400243	Enhancer	EIF5;RP11;MARK3;CKB;RP11;TRMT61A;KLC1;APOPT1;RP11;RP11;AL049840.1;XRCC3;ZFYVE21;PPP1R13B;CTD;C14orf2	Keratinocyte;Keratinocyte;Keratinocyte;Keratinocyte;Keratinocyte;Keratinocyte;Keratinocyte;Keratinocyte;Keratinocyte;Keratinocyte;Keratinocyte;Keratinocyte;Keratinocyte;Keratinocyte;Keratinocyte;Keratinocyte
chr15	37173538	37173738	Enhancer	C15orf41;RP11	Keratinocyte;Keratinocyte
chr15	40201468	40201668	Enhancer	GPR176;RP11;EIF2AK4;SRP14;RP11;BUB1B;PAK6;RP11;RP11;RP11	Keratinocyte;Keratinocyte;Keratinocyte;Keratinocyte;Keratinocyte;Keratinocyte;Keratinocyte;Keratinocyte;Keratinocyte;Keratinocyte
chr15	48042913	48043113	Enhancer	CTD	Keratinocyte
chr15	52774334	52774534	Enhancer	TMOD3;MAPK6;CTD;CTD;GNB5;EEF1B2P1;MYO5A;ARPP19;RP11;FAM214A;RPSAP55	Keratinocyte;Keratinocyte;Keratinocyte;Keratinocyte;Keratinocyte;Keratinocyte;Keratinocyte;Keratinocyte;Keratinocyte;Keratinocyte;Keratinocyte
chr15	55543264	55543464	Enhancer	RP11;CCPG1;RP11;RP11	Keratinocyte;Keratinocyte;Keratinocyte;Keratinocyte
chr15	59640409	59640609	Enhancer	RNF111;RP11;SLTM;CCNB2;LDHAL6B;RP11;RP11;FAM81A;MYO1E;RP11;RP11;GTF2A2;RP11;RP11;BNIP2;RPS3AP6	Keratinocyte;Keratinocyte;Keratinocyte;Keratinocyte;Keratinocyte;Keratinocyte;Keratinocyte;Keratinocyte;Keratinocyte;Keratinocyte;Keratinocyte;Keratinocyte;Keratinocyte;Keratinocyte;Keratinocyte;Keratinocyte
chr15	62149816	62150016	Enhancer	VPS13C;C2CD4B	HUVEC;HUVEC
chr15	65176253	65176453	Enhancer	GAPDHP61;RP11;PIF1;AC069368.3;PLEKHO2;PDCD7;CLPX;SNORA24	Keratinocyte;Keratinocyte;Keratinocyte;Keratinocyte;Keratinocyte;Keratinocyte;Keratinocyte;Keratinocyte
chr15	67366714	67366914	Enhancer	RP11;SMAD3;RP11;RP11;IQCH;AAGAB	Keratinocyte;Keratinocyte;Keratinocyte;Keratinocyte;Keratinocyte;Keratinocyte
chr15	69339128	69339328	Enhancer	ANP32A;NOX5;RP11;KIF23;RPLP1	Keratinocyte;Keratinocyte;Keratinocyte;Keratinocyte;Keratinocyte
chr15	74243681	74243881	Enhancer	LOXL1;RP11;STOML1;PML	HUVEC;HUVEC;HUVEC;HUVEC
chr15	81591636	81591836	Enhancer	RP11;STARD5;RP11;TMC3	Keratinocyte;Keratinocyte;Keratinocyte;Keratinocyte
chr15	91381497	91381697	Enhancer	CTD;CTD;FURIN;FES;MAN2A2;AC068831.15;UNC45A;HDDC3;AC068831.3;RCCD1;AC068831.6;AC068831.8;PRC1;VPS33B;AC068831.10	Keratinocyte;Keratinocyte;Keratinocyte;Keratinocyte;Keratinocyte;Keratinocyte;Keratinocyte;Keratinocyte;Keratinocyte;Keratinocyte;Keratinocyte;Keratinocyte;Keratinocyte;Keratinocyte;Keratinocyte
chr15	92611435	92611635	Enhancer	SLCO3A1;RP11;RP11	Keratinocyte;Keratinocyte;Keratinocyte
chr15	101860937	101861137	Enhancer	ALDH1A3;CHSY1;SELS;SNRPA1;RP11;RP11;TM2D3	Keratinocyte;Keratinocyte;Keratinocyte;Keratinocyte;Keratinocyte;Keratinocyte;Keratinocyte
chr16	4464327	4464527	Enhancer	GLIS2;RP11;PAM16;VASN;CORO7;CORO7;DNAJA3;HMOX2;NMRAL1;C16orf5;C16orf96;RP11;FAM100A;MGRN1;NUDT16L1;ANKS3;ZNF500;ROGDI;GLYR1;UBN1	Keratinocyte;Keratinocyte;Keratinocyte;Keratinocyte;Keratinocyte;Keratinocyte;Keratinocyte;Keratinocyte;Keratinocyte;Keratinocyte;Keratinocyte;Keratinocyte;Keratinocyte;Keratinocyte;Keratinocyte;Keratinocyte;Keratinocyte;Keratinocyte;Keratinocyte;Keratinocyte
chr16	12895629	12895829	Enhancer	CPPED1;RP11	Keratinocyte;Keratinocyte
chr16	15991591	15991791	Enhancer	NDE1;CTB;AF001548.5;MYH11;CTA;FOPNL;RPL15P20;ABCC1;RPL17P40;NOMO3;RP11;PKD1P1	Keratinocyte;Keratinocyte;Keratinocyte;Keratinocyte;Keratinocyte;Keratinocyte;Keratinocyte;Keratinocyte;Keratinocyte;Keratinocyte;Keratinocyte;Keratinocyte
chr16	48157460	48157660	Enhancer	UBA52P8;SIAH1	Keratinocyte;Keratinocyte
chr16	66551009	66551209	Enhancer	CDH5;CTD;CTD;CTD;RP11;RP11;RP11;TK2;CKLF;CKLF;CMTM1;CMTM3;RP11;NAE1;PDP2;RP11;RP11;CBFB	HUVEC;HUVEC;HUVEC;HUVEC;HUVEC;HUVEC;HUVEC;HUVEC;HUVEC;HUVEC;HUVEC;HUVEC;HUVEC;HUVEC;HUVEC;HUVEC;HUVEC;HUVEC
chr16	69511594	69511794	Enhancer	HAS3;RP11;CIRH1A;CHTF8;SNTB2;VPS4A;RP11;PDF;RP11;NIP7;COG8;RP11;RP11;TERF2;CYB5B;RP11;RP11;RP11;NQO1;CTD;NOB1;CTD;WWP2	Keratinocyte;Keratinocyte;Keratinocyte;Keratinocyte;Keratinocyte;Keratinocyte;Keratinocyte;Keratinocyte;Keratinocyte;Keratinocyte;Keratinocyte;Keratinocyte;Keratinocyte;Keratinocyte;Keratinocyte;Keratinocyte;Keratinocyte;Keratinocyte;Keratinocyte;Keratinocyte;Keratinocyte;Keratinocyte;Keratinocyte
chr16	82226419	82226619	Enhancer	7SK;SDR42E1;HSD17B2	Keratinocyte;Keratinocyte;Keratinocyte
chr16	82226484	82226684	Enhancer	7SK;SDR42E1;HSD17B2	Keratinocyte;Keratinocyte;Keratinocyte
chr16	84133351	84133551	Enhancer	RP11;MBTPS1;RP11;HSDL1;DNAAF1;RP11	Keratinocyte;Keratinocyte;Keratinocyte;Keratinocyte;Keratinocyte;Keratinocyte
chr16	88767091	88767291	Enhancer	RP11;ZC3H18;IL17C;CYBA;MVD;RP5;SNAI3;RP5;RNF166;CTU2;RP5;RP5;RP5;PIEZO1;CDT1;APRT;TRAPPC2L;GALNS;RP11	HUVEC;HUVEC;HUVEC;HUVEC;HUVEC;HUVEC;HUVEC;HUVEC;HUVEC;HUVEC;HUVEC;HUVEC;HUVEC;HUVEC;HUVEC;HUVEC;HUVEC;HUVEC;HUVEC
chr16	89381804	89382004	Enhancer	TRAPPC2L;RP11;AC137932.5;AC137932.6;ANKRD11;SPG7;RP11;RPL13;CPNE7;C16orf55;CHMP1A;CDK10;SPATA2L;RP11;ZNF276;C16orf7;TCF25;TUBB3;DEF8;AFG3L1P	Keratinocyte;Keratinocyte;Keratinocyte;Keratinocyte;Keratinocyte;Keratinocyte;Keratinocyte;Keratinocyte;Keratinocyte;Keratinocyte;Keratinocyte;Keratinocyte;Keratinocyte;Keratinocyte;Keratinocyte;Keratinocyte;Keratinocyte;Keratinocyte;Keratinocyte;Keratinocyte
chr16	89382149	89382349	Enhancer	TRAPPC2L;RP11;AC137932.5;AC137932.6;ANKRD11;SPG7;RP11;RPL13;CPNE7;C16orf55;CHMP1A;CDK10;SPATA2L;RP11;ZNF276;C16orf7;TCF25;TUBB3;DEF8;AFG3L1P	Keratinocyte;Keratinocyte;Keratinocyte;Keratinocyte;Keratinocyte;Keratinocyte;Keratinocyte;Keratinocyte;Keratinocyte;Keratinocyte;Keratinocyte;Keratinocyte;Keratinocyte;Keratinocyte;Keratinocyte;Keratinocyte;Keratinocyte;Keratinocyte;Keratinocyte;Keratinocyte
chr16	89382270	89382470	Enhancer	TRAPPC2L;RP11;AC137932.5;AC137932.6;ANKRD11;SPG7;RP11;RPL13;CPNE7;C16orf55;CHMP1A;CDK10;SPATA2L;RP11;ZNF276;C16orf7;TCF25;TUBB3;DEF8;AFG3L1P	Keratinocyte;Keratinocyte;Keratinocyte;Keratinocyte;Keratinocyte;Keratinocyte;Keratinocyte;Keratinocyte;Keratinocyte;Keratinocyte;Keratinocyte;Keratinocyte;Keratinocyte;Keratinocyte;Keratinocyte;Keratinocyte;Keratinocyte;Keratinocyte;Keratinocyte;Keratinocyte
chr16	89431587	89431787	Enhancer	ACSF3;RP11;ZNF778;RP11;RP11;AC137932.5;AC137932.6;ANKRD11;SPG7;RP11;RPL13;CPNE7;C16orf55;CHMP1A;CDK10;SPATA2L;RP11;ZNF276;C16orf7;FANCA;SPIRE2;TCF25;TUBB3;DEF8;AFG3L1P	Keratinocyte;Keratinocyte;Keratinocyte;Keratinocyte;Keratinocyte;Keratinocyte;Keratinocyte;Keratinocyte;Keratinocyte;Keratinocyte;Keratinocyte;Keratinocyte;Keratinocyte;Keratinocyte;Keratinocyte;Keratinocyte;Keratinocyte;Keratinocyte;Keratinocyte;Keratinocyte;Keratinocyte;Keratinocyte;Keratinocyte;Keratinocyte;Keratinocyte
chr17	1547839	1548039	Enhancer	CRK;MYO1C;INPP5K;AC100748.2;PITPNA;AC130343.1;SLC43A2;SCARF1;RILP;PRPF8;TLCD2;MIR22;WDR81;MIR22HG;RP11;SERPINF2;SERPINF1;RPA1;SMYD4;AC016292.3;RTN4RL1;DPH1;OVCA2	HUVEC,Keratinocyte;HUVEC,Keratinocyte;HUVEC,Keratinocyte;HUVEC,Keratinocyte;HUVEC,Keratinocyte;HUVEC;HUVEC;HUVEC,Keratinocyte;HUVEC,Keratinocyte;HUVEC,Keratinocyte;HUVEC,Keratinocyte;HUVEC;HUVEC;HUVEC,Keratinocyte;HUVEC,Keratinocyte;HUVEC;Keratinocyte;Keratinocyte;Keratinocyte;Keratinocyte;Keratinocyte;Keratinocyte;Keratinocyte
chr17	1547859	1548059	Enhancer	CRK;MYO1C;INPP5K;AC100748.2;PITPNA;AC130343.1;SLC43A2;SCARF1;RILP;PRPF8;TLCD2;MIR22;WDR81;MIR22HG;RP11;SERPINF2;SERPINF1;RPA1;SMYD4;AC016292.3;RTN4RL1;DPH1;OVCA2	HUVEC,Keratinocyte;HUVEC,Keratinocyte;HUVEC,Keratinocyte;HUVEC,Keratinocyte;HUVEC,Keratinocyte;HUVEC;HUVEC;HUVEC,Keratinocyte;HUVEC,Keratinocyte;HUVEC,Keratinocyte;HUVEC,Keratinocyte;HUVEC;HUVEC;HUVEC,Keratinocyte;HUVEC,Keratinocyte;HUVEC;Keratinocyte;Keratinocyte;Keratinocyte;Keratinocyte;Keratinocyte;Keratinocyte;Keratinocyte
chr17	1547890	1548090	Enhancer	CRK;MYO1C;INPP5K;AC100748.2;PITPNA;AC130343.1;SLC43A2;SCARF1;RILP;PRPF8;TLCD2;MIR22;WDR81;MIR22HG;RP11;SERPINF2;SERPINF1;RPA1;SMYD4;AC016292.3;RTN4RL1;DPH1;OVCA2	HUVEC,Keratinocyte;HUVEC,Keratinocyte;HUVEC,Keratinocyte;HUVEC,Keratinocyte;HUVEC,Keratinocyte;HUVEC;HUVEC;HUVEC,Keratinocyte;HUVEC,Keratinocyte;HUVEC,Keratinocyte;HUVEC,Keratinocyte;HUVEC;HUVEC;HUVEC,Keratinocyte;HUVEC,Keratinocyte;HUVEC;Keratinocyte;Keratinocyte;Keratinocyte;Keratinocyte;Keratinocyte;Keratinocyte;Keratinocyte
chr17	4615065	4615265	Enhancer	RYKP1;ANKFY1;RP11;RP11;PELP1;RP11;ARRB2;MED11;RP11;CXCL16;ZMYND15;RP11;PLD2;C17orf107;CHRNE;RNF167;SLC25A11;ENO3;PFN1;SPAG7;RP5;RP5;CAMTA2;RP5;INCA1;KIF1C;AC109333.10;SLC52A1;ZFP3;AC012146.7;USP6;ZNF232	Keratinocyte;Keratinocyte;Keratinocyte;Keratinocyte;Keratinocyte;Keratinocyte;Keratinocyte;Keratinocyte;Keratinocyte;Keratinocyte;Keratinocyte;Keratinocyte;Keratinocyte;Keratinocyte;Keratinocyte;Keratinocyte;Keratinocyte;Keratinocyte;Keratinocyte;Keratinocyte;Keratinocyte;Keratinocyte;Keratinocyte;Keratinocyte;Keratinocyte;Keratinocyte;Keratinocyte;Keratinocyte;Keratinocyte;Keratinocyte;Keratinoc…
chr17	7287552	7287752	Enhancer	ACADVL;DLG4;DVL2;PHF23;GABARAP;CTD;C17orf81;CTDNEP1;RP1;CLDN7;SLC2A4;YBX2;EIF5A;GPS2;RP11;NEURL4;ACAP1;KCTD11;RP11;TMEM95;TNK1;C17orf61;PLSCR3;C17orf61;NLGN2;RP11;TMEM102;RP11;FGF11;RP11;CHRNB1;SLC35G6;ZBTB4;POLR2A;TNFSF13;SENP3;EIF4A1;MPDU1;AC113189.5;SOX15;FXR2;RPL29P2	Keratinocyte;Keratinocyte;Keratinocyte;Keratinocyte;Keratinocyte;Keratinocyte;Keratinocyte;Keratinocyte;Keratinocyte;Keratinocyte;Keratinocyte;Keratinocyte;Keratinocyte;Keratinocyte;Keratinocyte;Keratinocyte;Keratinocyte;Keratinocyte;Keratinocyte;Keratinocyte;Keratinocyte;Keratinocyte;Keratinocyte;Keratinocyte;Keratinocyte;Keratinocyte;Keratinocyte;Keratinocyte;Keratinocyte;Keratinocyte;Keratinoc…
chr17	16323381	16323581	Enhancer	TTC19;ZSWIM7;NCOR1;PIGL;AC005971.3;CENPV;UBB;TRPV2;AC093484.4;C17orf76;FAM211A;AC005822.1;CCDC144A;ZNF287;ZNF624	HUVEC;HUVEC;HUVEC;HUVEC;HUVEC;HUVEC;HUVEC,Keratinocyte;HUVEC,Keratinocyte;HUVEC;HUVEC,Keratinocyte;HUVEC,Keratinocyte;HUVEC;HUVEC;Keratinocyte;Keratinocyte
chr17	17753416	17753616	Enhancer	SMCR2;RAI1;RAI1;SMCR5;SREBF1;AC122129.1;TOM1L2;AC087163.2;ATPAF2;C17orf39;DRG2;ALKBH5;LLGL1;FLII;SMCR7;SMCR8;SHMT1	HUVEC;HUVEC;HUVEC;HUVEC;HUVEC;HUVEC;HUVEC;HUVEC;HUVEC;HUVEC;HUVEC;HUVEC;HUVEC;HUVEC;HUVEC;HUVEC;HUVEC
chr17	19207467	19207667	Enhancer	EPN2;EPN2;EPN2;MAPK7;B9D1;MFAP4;RNF112;RPL17P43;RPS2P46;SLC47A1	HUVEC;HUVEC;HUVEC;HUVEC;HUVEC;HUVEC;HUVEC;HUVEC;HUVEC;HUVEC
chr17	19273819	19274019	Enhancer	FAM18B1;AC090286.2;FAM83G;SNORD3B;SNORD3D;SNORD3A;EPN2;EPN2;EPN2;MAPK7;B9D1;MFAP4;RNF112;RPL17P43;RPS2P46;SLC47A1;ALDH3A2	Keratinocyte;Keratinocyte;Keratinocyte;Keratinocyte;Keratinocyte;Keratinocyte;Keratinocyte;Keratinocyte;Keratinocyte;Keratinocyte;Keratinocyte;Keratinocyte;Keratinocyte;Keratinocyte;Keratinocyte;Keratinocyte;Keratinocyte
chr17	30399044	30399244	Enhancer	C17orf79;SUZ12	HUVEC;HUVEC
chr17	40426790	40426990	Enhancer	KRT16;EIF1;CNP;NKIRAS2;STAT5B;STAT5A;STAT3;PTRF;ATP6V0A1;AC067852.1;NAGLU;HSD17B1;MLX;TUBG1;FAM134C;TUBG2;PLEKHH3;CCR10;CNTNAP1;VPS25;CCDC56;PSME3;AOC2	Keratinocyte;Keratinocyte;Keratinocyte;Keratinocyte;Keratinocyte;Keratinocyte;Keratinocyte;Keratinocyte;Keratinocyte;Keratinocyte;Keratinocyte;Keratinocyte;Keratinocyte;Keratinocyte;Keratinocyte;Keratinocyte;Keratinocyte;Keratinocyte;Keratinocyte;Keratinocyte;Keratinocyte;Keratinocyte;Keratinocyte
chr17	47465556	47465756	Enhancer	RP11;ZNF652;RP11;PHB;AC004797.1;NGFR;RP5;NXPH3;KAT7;RP11	Keratinocyte;Keratinocyte;Keratinocyte;Keratinocyte;Keratinocyte;Keratinocyte;Keratinocyte;Keratinocyte;Keratinocyte;Keratinocyte
chr17	53025800	53026000	Enhancer	STXBP4;COX11	HUVEC;HUVEC
chr17	53497473	53497673	Enhancer	MMD;CTD;PCTP	Keratinocyte;Keratinocyte;Keratinocyte
chr17	57451207	57451407	Enhancer	TRIM37;SKA2;PRR11;YPEL2;DHX40;PTRH2	Keratinocyte;Keratinocyte;Keratinocyte;Keratinocyte;Keratinocyte;Keratinocyte
chr17	57861541	57861741	Enhancer	DHX40;CLTC;RPS6KB1	Keratinocyte;Keratinocyte;Keratinocyte
chr17	76380822	76381022	Enhancer	PGS1	Keratinocyte
chr17	76815117	76815317	Enhancer	TK1;BIRC5;SOCS3;CYTH1;USP36;AC100788.1;TIMP2	HUVEC;HUVEC;HUVEC;HUVEC;HUVEC;HUVEC;HUVEC
chr17	80545075	80545275	Enhancer	LRRC45;FASN;CCDC57;SLC16A3;AC132872.1;CSNK1D;RP13;HEXDC;C17orf101;C17orf62;NARF;FOXK2;RP13;RP13;WDR45L;RAB40B;RP11;FN3K;RP11;TBCD;ZNF750;RP11	Keratinocyte;Keratinocyte;Keratinocyte;Keratinocyte;Keratinocyte;Keratinocyte;Keratinocyte;Keratinocyte;Keratinocyte;Keratinocyte;Keratinocyte;Keratinocyte;Keratinocyte;Keratinocyte;Keratinocyte;Keratinocyte;Keratinocyte;Keratinocyte;Keratinocyte;Keratinocyte;Keratinocyte;Keratinocyte
chr17	80545172	80545372	Enhancer	LRRC45;FASN;CCDC57;SLC16A3;AC132872.1;CSNK1D;RP13;HEXDC;C17orf101;C17orf62;NARF;FOXK2;RP13;RP13;WDR45L;RAB40B;RP11;FN3K;RP11;TBCD;ZNF750;RP11	Keratinocyte;Keratinocyte;Keratinocyte;Keratinocyte;Keratinocyte;Keratinocyte;Keratinocyte;Keratinocyte;Keratinocyte;Keratinocyte;Keratinocyte;Keratinocyte;Keratinocyte;Keratinocyte;Keratinocyte;Keratinocyte;Keratinocyte;Keratinocyte;Keratinocyte;Keratinocyte;Keratinocyte;Keratinocyte
chr17	80545210	80545410	Enhancer	LRRC45;FASN;CCDC57;SLC16A3;AC132872.1;CSNK1D;RP13;HEXDC;C17orf101;C17orf62;NARF;FOXK2;RP13;RP13;WDR45L;RAB40B;RP11;FN3K;RP11;TBCD;ZNF750;RP11	Keratinocyte;Keratinocyte;Keratinocyte;Keratinocyte;Keratinocyte;Keratinocyte;Keratinocyte;Keratinocyte;Keratinocyte;Keratinocyte;Keratinocyte;Keratinocyte;Keratinocyte;Keratinocyte;Keratinocyte;Keratinocyte;Keratinocyte;Keratinocyte;Keratinocyte;Keratinocyte;Keratinocyte;Keratinocyte
chr17	81006385	81006585	Enhancer	ZNF750;RP11;B3GNTL1;METRNL;AC144831.1	HUVEC;HUVEC;HUVEC;HUVEC;HUVEC
chr17	81006397	81006597	Enhancer	ZNF750;RP11;B3GNTL1;METRNL;AC144831.1	HUVEC;HUVEC;HUVEC;HUVEC;HUVEC
chr17	81006424	81006624	Enhancer	ZNF750;RP11;B3GNTL1;METRNL;AC144831.1	HUVEC;HUVEC;HUVEC;HUVEC;HUVEC
chr17	81041923	81042123	Enhancer	FOXK2;WDR45L;FN3KRP;TBCD;B3GNTL1;METRNL;AC144831.1	Keratinocyte;Keratinocyte;Keratinocyte;Keratinocyte;Keratinocyte;Keratinocyte;Keratinocyte
chr18	3467074	3467274	Enhancer	MYL12A;MYL12B;RP11;RP11;TGIF1;RP11	HUVEC;HUVEC;HUVEC;HUVEC;HUVEC;HUVEC
chr18	10057833	10058033	Enhancer	RALBP1;PPP4R1;AC006238.1;VAPA	Keratinocyte;Keratinocyte;Keratinocyte;Keratinocyte
chr18	13052129	13052329	Enhancer	SEH1L;CEP192	HUVEC;HUVEC
chr18	21154160	21154360	Enhancer	TMEM241;C18orf8;NPC1;ANKRD29;LAMA3;TTC39C;CABYR	Keratinocyte;Keratinocyte;Keratinocyte;Keratinocyte;Keratinocyte;Keratinocyte;Keratinocyte
chr18	21418823	21419023	Enhancer	TMEM241;RIOK3;C18orf8;NPC1;ANKRD29;LAMA3;TTC39C;CABYR	Keratinocyte;Keratinocyte;Keratinocyte;Keratinocyte;Keratinocyte;Keratinocyte;Keratinocyte;Keratinocyte
chr18	29673998	29674198	Enhancer	MCART2;RNF125;RP11;RNF138;AC021224.1;HNRNPA1P7	Keratinocyte;Keratinocyte;Keratinocyte;Keratinocyte;Keratinocyte;Keratinocyte
chr18	33196923	33197123	Enhancer	ZNF397;ZSCAN30;ZNF271;ZNF24;RP11;GALNT1	Keratinocyte;Keratinocyte;Keratinocyte;Keratinocyte;Keratinocyte;Keratinocyte
chr18	33196945	33197145	Enhancer	ZNF397;ZSCAN30;ZNF271;ZNF24;RP11;GALNT1	Keratinocyte;Keratinocyte;Keratinocyte;Keratinocyte;Keratinocyte;Keratinocyte
chr19	2082022	2082222	Enhancer	REXO1;KLF16;CTB;FAM108A1;SCAMP4;AC012615.1;CSNK1G2;BTBD2;MKNK2;MOB3A;IZUMO4;AP3D1;DOT1L;PLEKHJ1;SF3A2;LSM7;SPPL2B;TIMM13;LMNB2;GADD45B	Keratinocyte;Keratinocyte;Keratinocyte;Keratinocyte;Keratinocyte;Keratinocyte;Keratinocyte;Keratinocyte;Keratinocyte;Keratinocyte;Keratinocyte;Keratinocyte;Keratinocyte;Keratinocyte;Keratinocyte;Keratinocyte;Keratinocyte;Keratinocyte;Keratinocyte;Keratinocyte
chr19	2085186	2085386	Enhancer	REXO1;KLF16;CTB;FAM108A1;SCAMP4;AC012615.1;CSNK1G2;BTBD2;MKNK2;MOB3A;IZUMO4;AP3D1;DOT1L;PLEKHJ1;SF3A2;LSM7;SPPL2B;TIMM13;LMNB2;GADD45B	Keratinocyte;Keratinocyte;Keratinocyte;Keratinocyte;Keratinocyte;Keratinocyte;Keratinocyte;Keratinocyte;Keratinocyte;Keratinocyte;Keratinocyte;Keratinocyte;Keratinocyte;Keratinocyte;Keratinocyte;Keratinocyte;Keratinocyte;Keratinocyte;Keratinocyte;Keratinocyte
chr19	2085197	2085397	Enhancer	REXO1;KLF16;CTB;FAM108A1;SCAMP4;AC012615.1;CSNK1G2;BTBD2;MKNK2;MOB3A;IZUMO4;AP3D1;DOT1L;PLEKHJ1;SF3A2;LSM7;SPPL2B;TIMM13;LMNB2;GADD45B	Keratinocyte;Keratinocyte;Keratinocyte;Keratinocyte;Keratinocyte;Keratinocyte;Keratinocyte;Keratinocyte;Keratinocyte;Keratinocyte;Keratinocyte;Keratinocyte;Keratinocyte;Keratinocyte;Keratinocyte;Keratinocyte;Keratinocyte;Keratinocyte;Keratinocyte;Keratinocyte
chr19	4327250	4327450	Enhancer	MIR637;ZBTB7A;MAP2K2;SIRT6;ANKRD24;EBI3;CCDC94;FSD1;MPND;SH3GL1;CHAF1A;UBXN6;AC011498.1;AC011498.2;PLIN4;PLIN5;SEMA6B;TNFAIP8L1;C19orf10;DPP9	HUVEC;HUVEC;HUVEC;HUVEC;HUVEC;HUVEC;HUVEC;HUVEC;HUVEC;HUVEC;HUVEC;HUVEC;HUVEC;HUVEC;HUVEC;HUVEC;HUVEC;HUVEC;HUVEC;HUVEC
chr19	4328645	4328845	Enhancer	MAP2K2;SIRT6;CCDC94;FSD1;SH3GL1;CHAF1A;UBXN6;AC011498.1;SEMA6B;DAPK3;EEF2;PIAS4;ZBTB7A;ANKRD24;EBI3;SHD;AC011498.2;PLIN4;PLIN5	HUVEC;HUVEC;HUVEC;HUVEC;HUVEC;HUVEC;HUVEC;HUVEC;HUVEC;HUVEC;HUVEC;HUVEC;HUVEC;HUVEC;HUVEC;HUVEC;HUVEC;HUVEC;HUVEC
chr19	4328659	4328859	Enhancer	MAP2K2;SIRT6;CCDC94;FSD1;SH3GL1;CHAF1A;UBXN6;AC011498.1;SEMA6B;DAPK3;EEF2;PIAS4;ZBTB7A;ANKRD24;EBI3;SHD;AC011498.2;PLIN4;PLIN5	HUVEC;HUVEC;HUVEC;HUVEC;HUVEC;HUVEC;HUVEC;HUVEC;HUVEC;HUVEC;HUVEC;HUVEC;HUVEC;HUVEC;HUVEC;HUVEC;HUVEC;HUVEC;HUVEC
chr19	4328718	4328918	Enhancer	DAPK3;EEF2;PIAS4;ZBTB7A;MAP2K2;SIRT6;ANKRD24;EBI3;CCDC94;SHD;FSD1;SH3GL1;CHAF1A;UBXN6;AC011498.1;AC011498.2;PLIN4;PLIN5;SEMA6B	HUVEC;HUVEC;HUVEC;HUVEC;HUVEC;HUVEC;HUVEC;HUVEC;HUVEC;HUVEC;HUVEC;HUVEC;HUVEC;HUVEC;HUVEC;HUVEC;HUVEC;HUVEC;HUVEC
chr19	10105876	10106076	Enhancer	FBXL12;UBL5;PIN1;DNMT1;FDX1L;RAVER1;TYK2;MIR1181;CDC37;PDE4A;KEAP1;SLC44A2;ILF3	HUVEC;HUVEC;HUVEC;HUVEC;HUVEC;HUVEC;HUVEC;HUVEC;HUVEC;HUVEC;HUVEC;HUVEC;HUVEC
chr19	13540493	13540693	Enhancer	JUNB;PRDX2;RNASEH2A	HUVEC;HUVEC;HUVEC
chr19	15411740	15411940	Enhancer	CASP14;BRD4;AKAP8;AKAP8L;WIZ;AD000091.1	Keratinocyte;Keratinocyte;Keratinocyte;Keratinocyte;Keratinocyte;Keratinocyte
chr19	16253054	16253254	Enhancer	CYP4F11;TPM4;RAB8A;HSH2D;FAM32A;AP1M1	Keratinocyte;Keratinocyte;Keratinocyte;Keratinocyte;Keratinocyte;Keratinocyte
chr19	16436957	16437157	Enhancer	TPM4;RAB8A;FAM32A;AP1M1;KLF2;C19orf44;CHERP;SLC35E1;SIN3B	HUVEC;HUVEC;HUVEC;HUVEC;HUVEC;HUVEC;HUVEC;HUVEC;HUVEC
chr19	16676997	16677197	Enhancer	TPM4;FAM32A;AP1M1;KLF2;AC020917.1;CTD;EPS15L1;C19orf44;AC008764.1;CHERP;SLC35E1;MED26;C19orf42;TMEM38A	HUVEC;HUVEC;HUVEC;HUVEC;HUVEC;HUVEC;HUVEC;HUVEC;HUVEC;HUVEC;HUVEC;HUVEC;HUVEC;HUVEC
chr19	38974850	38975050	Enhancer	YIF1B;CATSPERG;snoU13;RYR1;ACTN4;CAPN12;ECH1;HNRNPL;RINL;NFKBIB;SIRT2;MRPS12;SARS2;PAK4	HUVEC;HUVEC;HUVEC;HUVEC;HUVEC;HUVEC;HUVEC;HUVEC;HUVEC;HUVEC;HUVEC;HUVEC;HUVEC;HUVEC
chr19	41700169	41700369	Enhancer	CYP2S1;AXL;B9D2;CTC;BCKDHA	Keratinocyte;Keratinocyte;Keratinocyte;Keratinocyte;Keratinocyte
chr19	41827794	41827994	Enhancer	CTD;CYP2S1;AXL;HNRNPUL1;AC011510.1;CCDC97;TMEM91;TGFB1;B9D2;CTC;EXOSC5;BCKDHA;B3GNT8;ATP5SL;CEACAM21;RPS19;RABAC1	HUVEC;HUVEC;HUVEC;HUVEC;HUVEC;HUVEC;HUVEC;HUVEC;HUVEC;HUVEC;HUVEC;HUVEC;HUVEC;HUVEC;HUVEC;HUVEC;HUVEC
chr19	46313204	46313404	Enhancer	CD3EAP;PPP1R13L;FOSB;ERCC1;PPM1N;RTN2;VASP;SIX5;DMPK;IGFL3;TGIF1P1;IGFL1;PPP5C	Keratinocyte;Keratinocyte;Keratinocyte;Keratinocyte;Keratinocyte;Keratinocyte;Keratinocyte;Keratinocyte;Keratinocyte;Keratinocyte;Keratinocyte;Keratinocyte;Keratinocyte
chr19	46684743	46684943	Enhancer	SYMPK;PGLYRP1;TGIF1P1;IGFL2;CCDC8;AC011551.1	Keratinocyte;Keratinocyte;Keratinocyte;Keratinocyte;Keratinocyte;Keratinocyte
chr20	20351902	20352102	Enhancer	RPL12L3;RIN2	Keratinocyte;Keratinocyte
chr20	33115743	33115943	Enhancer	EIF2S2;XPOTP1;RP4;RP4;AHCY;ITCH;CDC42P1;ITCH;ITCH;FDX1P1;DYNLRB1;MAP1LC3A;PIGU;TP53INP2;NCOA6;HMGB3P1	Keratinocyte;Keratinocyte;Keratinocyte;Keratinocyte;Keratinocyte;Keratinocyte;Keratinocyte;Keratinocyte;Keratinocyte;Keratinocyte;Keratinocyte;Keratinocyte;Keratinocyte;Keratinocyte;Keratinocyte;Keratinocyte
chr20	44406781	44406981	Enhancer	WFDC3;DNTTIP1;UBE2C;TNNC2;SNX21;ACOT8;ZSWIM3;ZSWIM1;SPATA25;CTSA;NEURL2;PLTP;PCIF1;ZNF335;RPL13P2;CD40	Keratinocyte;Keratinocyte;Keratinocyte;Keratinocyte;Keratinocyte;Keratinocyte;Keratinocyte;Keratinocyte;Keratinocyte;Keratinocyte;Keratinocyte;Keratinocyte;Keratinocyte;Keratinocyte;Keratinocyte;Keratinocyte
chr20	49114673	49114873	Enhancer	RNF114;UBE2V1;TMEM189;CEBPB;PTPN1;AL133230.1;RP4;RPL36P2;FAM65C;PARD6B;BCAS4;TMSB4XP6;PSMD10P1;RP5;ADNP;DPM1;MOCS3	Keratinocyte;Keratinocyte;Keratinocyte;Keratinocyte;Keratinocyte;Keratinocyte;Keratinocyte;Keratinocyte;Keratinocyte;Keratinocyte;Keratinocyte;Keratinocyte;Keratinocyte;Keratinocyte;Keratinocyte;Keratinocyte;Keratinocyte
chr20	49140360	49140560	Enhancer	RNF114;KRT18P4;UBE2V1;TMEM189;RP11;CEBPB;AL034429.1;PTPN1;AL133230.1;RP4;RPL36P2;FAM65C;PARD6B;BCAS4;TMSB4XP6;PSMD10P1;RP5;ADNP;DPM1;MOCS3	Keratinocyte;Keratinocyte;Keratinocyte;Keratinocyte;Keratinocyte;Keratinocyte;Keratinocyte;Keratinocyte;Keratinocyte;Keratinocyte;Keratinocyte;Keratinocyte;Keratinocyte;Keratinocyte;Keratinocyte;Keratinocyte;Keratinocyte;Keratinocyte;Keratinocyte;Keratinocyte
chr20	49158146	49158346	Enhancer	RNF114;UBE2V1;TMEM189;TMEM189;CEBPB;AL034429.1;PTPN1;AL133230.1;RP4;RPL36P2;FAM65C;PARD6B;BCAS4;TMSB4XP6;PSMD10P1;RP5;ADNP;DPM1;MOCS3	Keratinocyte;Keratinocyte;Keratinocyte;Keratinocyte;Keratinocyte;Keratinocyte;Keratinocyte;Keratinocyte;Keratinocyte;Keratinocyte;Keratinocyte;Keratinocyte;Keratinocyte;Keratinocyte;Keratinocyte;Keratinocyte;Keratinocyte;Keratinocyte;Keratinocyte
chr21	17106109	17106309	Enhancer	USP25	Keratinocyte
chr21	30009154	30009354	Enhancer	AF131217.1;HSPD1P7;THUMPD1P1;LTN1;RPL23P2;CCT8;BACH1	Keratinocyte;Keratinocyte;Keratinocyte;Keratinocyte;Keratinocyte;Keratinocyte;Keratinocyte
chr21	36418666	36418866	Enhancer	RCAN1;EZH2P1	Keratinocyte;Keratinocyte
chr21	39661696	39661896	Enhancer	KCNJ15;SPATA20P1	Keratinocyte;Keratinocyte
chr21	39832452	39832652	Enhancer	KCNJ15;SPATA20P1;ETS2	Keratinocyte;Keratinocyte;Keratinocyte
chr21	40017353	40017553	Enhancer	KCNJ15;ERG;PSMG1	Keratinocyte;Keratinocyte;Keratinocyte
chr22	19752769	19752969	Enhancer	UFD1L;TBX1;AC000089.3;C22orf29;GNB1L;COMT;TXNRD2;C22orf25;RANBP1	Keratinocyte;Keratinocyte;Keratinocyte;Keratinocyte;Keratinocyte;Keratinocyte;Keratinocyte;Keratinocyte;Keratinocyte
chr22	20906266	20906466	Enhancer	ZNF74;SCARF2;XXbac;KRT18P5;KLHL22;MED15;AC007050.17;SMPD4P1;FAM108A5P;AC007308.6;SERPIND1;LZTR1	HUVEC;HUVEC;HUVEC;HUVEC;HUVEC;HUVEC;HUVEC;HUVEC;HUVEC;HUVEC;HUVEC;HUVEC
chr22	28536041	28536241	Enhancer	TTC28	Keratinocyte
chr22	34199219	34199419	Enhancer	LARGE;LARGE	Keratinocyte;Keratinocyte
chr22	38029378	38029578	Enhancer	MFNG;CDC42EP1;LGALS2;GGA1;Z83844.1;PDXP;LGALS1;NOL12;NOL12;TRIOBP;H1F0;GCAT;MIR658;ANKRD54;EIF3L;MICALL1;POLR2F;C22orf23;SOX10;RP5;PICK1;MAFF;TMEM184B	HUVEC;HUVEC;HUVEC;HUVEC;HUVEC;HUVEC;HUVEC;HUVEC;HUVEC;HUVEC;HUVEC;HUVEC;HUVEC;HUVEC;HUVEC;HUVEC;HUVEC;HUVEC;HUVEC;HUVEC;HUVEC;HUVEC;HUVEC
chr22	46367517	46367717	Enhancer	ATXN10;RP1;WNT7B;C22orf26;RP6;RP6;PPARA;C22orf40;TTC38	Keratinocyte;Keratinocyte;Keratinocyte;Keratinocyte;Keratinocyte;Keratinocyte;Keratinocyte;Keratinocyte;Keratinocyte
chr22	50154970	50155170	Enhancer	RP5	Keratinocyte
chr1	1109144	1109344	Promoter	TTLL10
chr1	1109386	1109586	Promoter	TTLL10
chr1	1144458	1144658	Promoter	TNFRSF18
chr1	6054767	6054967	Promoter	NPHP4
chr1	6526369	6526569	Promoter	TNFRSF25
chr1	8003322	8003522	Promoter	TNFRSF9
chr1	8487770	8487970	Promoter	RERE
chr1	9290985	9291185	Promoter	H6PD
chr1	9711298	9711498	Promoter	PIK3CD
chr1	9714180	9714380	Promoter	PIK3CD-AS1
chr1	9714297	9714497	Promoter	PIK3CD-AS1
chr1	9714743	9714943	Promoter	PIK3CD-AS1
chr1	11710510	11710710	Promoter	FBXO44
chr1	15734185	15734385	Promoter	EFHD2
chr1	16871198	16871398	Promoter	MIR3675
chr1	17189522	17189722	Promoter	MIR3675
chr1	17528138	17528338	Promoter	PADI1
chr1	18391989	18392189	Promoter	LOC101927876
chr1	21619971	21620171	Promoter	LOC100506801,ECE1
chr1	24239720	24239920	Promoter	CNR2
chr1	24239900	24240100	Promoter	CNR2
chr1	25291285	25291485	Promoter	RUNX3
chr1	25291446	25291646	Promoter	RUNX3
chr1	25291805	25292005	Promoter	RUNX3
chr1	26547134	26547334	Promoter	LOC101928303
chr1	26644662	26644862	Promoter	UBXN11,CD52
chr1	26645213	26645413	Promoter	UBXN11
chr1	26645387	26645587	Promoter	UBXN11
chr1	26699873	26700073	Promoter	ZNF683
chr1	31230637	31230837	Promoter	LAPTM5
chr1	31230746	31230946	Promoter	LAPTM5
chr1	32173319	32173519	Promoter	COL16A1
chr1	32715328	32715528	Promoter	LCK
chr1	32715349	32715549	Promoter	LCK
chr1	32716673	32716873	Promoter	LCK
chr1	32716707	32716907	Promoter	LCK
chr1	32716717	32716917	Promoter	LCK
chr1	32716727	32716927	Promoter	LCK
chr1	36270110	36270310	Promoter	AGO4
chr1	37944157	37944357	Promoter	LINC01137,MIR6732
chr1	38412419	38412619	Promoter	INPP5B
chr1	38412584	38412784	Promoter	INPP5B
chr1	38412588	38412788	Promoter	INPP5B
chr1	38412611	38412811	Promoter	INPP5B
chr1	40860492	40860692	Promoter	SMAP2
chr1	43766547	43766747	Promoter	TIE1
chr1	45989280	45989480	Promoter	PRDX1
chr1	52195570	52195770	Promoter	OSBPL9
chr1	53794050	53794250	Promoter	LRP8
chr1	55683237	55683437	Promoter	USP24
chr1	55683255	55683455	Promoter	USP24
chr1	55683273	55683473	Promoter	USP24
chr1	57045646	57045846	Promoter	PPAP2B
chr1	59758363	59758563	Promoter	FGGY
chr1	66796639	66796839	Promoter	PDE4B
chr1	66815877	66816077	Promoter	PDE4B
chr1	67631912	67632112	Promoter	IL23R
chr1	70225566	70225766	Promoter	LRRC7
chr1	86044076	86044276	Promoter	CYR61,DDAH1
chr1	86932682	86932882	Promoter	CLCA1
chr1	89664682	89664882	Promoter	GBP4
chr1	92414195	92414395	Promoter	BRDT
chr1	92414622	92414822	Promoter	BRDT
chr1	94080980	94081180	Promoter	BCAR3
chr1	108440222	108440422	Promoter	MIR7852
chr1	109395157	109395357	Promoter	SPATA42
chr1	110035570	110035770	Promoter	CYB561D1
chr1	110616763	110616963	Promoter	ALX3
chr1	111033781	111033981	Promoter	LOC440602
chr1	111174023	111174223	Promoter	KCNA2
chr1	111178908	111179108	Promoter	KCNA2
chr1	111415681	111415881	Promoter	CD53
chr1	112016486	112016686	Promoter	C1orf162
chr1	112049999	112050199	Promoter	ADORA3
chr1	112158997	112159197	Promoter	RAP1A
chr1	113164572	113164772	Promoter	ST7L
chr1	114413942	114414142	Promoter	PTPN22
chr1	114414212	114414412	Promoter	PTPN22
chr1	114414240	114414440	Promoter	PTPN22
chr1	114414308	114414508	Promoter	PTPN22
chr1	114414432	114414632	Promoter	PTPN22
chr1	116312629	116312829	Promoter	CASQ2
chr1	116923371	116923571	Promoter	ATP1A1
chr1	117544106	117544306	Promoter	CD101
chr1	117544316	117544516	Promoter	CD101
chr1	120049054	120049254	Promoter	HSD3B1
chr1	121258390	121258590	Promoter	EMBP1
chr1	145715536	145715736	Promoter	CD160
chr1	147399474	147399674	Promoter	GPR89B
chr1	151030868	151031068	Promoter	MLLT11
chr1	151129198	151129398	Promoter	TNFAIP8L2-SCNM1
chr1	151693122	151693322	Promoter	CELF3,RIIAD1
chr1	152088989	152089189	Promoter	TCHH
chr1	152298941	152299141	Promoter	FLG
chr1	152333323	152333523	Promoter	FLG2
chr1	152482480	152482680	Promoter	LCE5A,CRCT1
chr1	152636162	152636362	Promoter	LCE2D
chr1	152669885	152670085	Promoter	LCE2A
chr1	152680402	152680602	Promoter	LCE4A
chr1	152681787	152681987	Promoter	LCE4A
chr1	152814731	152814931	Promoter	LCE6A
chr1	152941045	152941245	Promoter	SPRR4
chr1	152955443	152955643	Promoter	SPRR1A
chr1	152973857	152974057	Promoter	SPRR3
chr1	153085549	153085749	Promoter	SPRR2F
chr1	153114590	153114790	Promoter	SPRR2C
chr1	153124155	153124355	Promoter	SPRR2G
chr1	153145494	153145694	Promoter	LOC101928009
chr1	153146264	153146464	Promoter	LOC101928009
chr1	154164851	154165051	Promoter	TPM3
chr1	154582056	154582256	Promoter	ADAR
chr1	156786623	156786823	Promoter	SH2D2A
chr1	157670120	157670320	Promoter	FCRL3
chr1	157670228	157670428	Promoter	FCRL3
chr1	157670381	157670581	Promoter	FCRL3
chr1	157670610	157670810	Promoter	FCRL3
chr1	157789792	157789992	Promoter	FCRL1
chr1	157789833	157790033	Promoter	FCRL1
chr1	158259168	158259368	Promoter	CD1C
chr1	158549320	158549520	Promoter	OR10X1
chr1	158656384	158656584	Promoter	SPTA1
chr1	158656618	158656818	Promoter	SPTA1
chr1	158799924	158800124	Promoter	MNDA
chr1	158900449	158900649	Promoter	PYHIN1
chr1	158900544	158900744	Promoter	PYHIN1
chr1	158978712	158978912	Promoter	IFI16
chr1	159046673	159046873	Promoter	AIM2
chr1	159046934	159047134	Promoter	AIM2
chr1	159047063	159047263	Promoter	AIM2
chr1	159047077	159047277	Promoter	AIM2
chr1	159770153	159770353	Promoter	FCRL6
chr1	159770268	159770468	Promoter	FCRL6
chr1	159796207	159796407	Promoter	SLAMF8
chr1	159928580	159928780	Promoter	LINC01133,SLAMF9
chr1	160492989	160493189	Promoter	SLAMF6
chr1	160616504	160616704	Promoter	SLAMF1
chr1	160617227	160617427	Promoter	SLAMF1
chr1	160617256	160617456	Promoter	SLAMF1
chr1	160681304	160681504	Promoter	CD48
chr1	160681660	160681860	Promoter	CD48
chr1	160681797	160681997	Promoter	CD48
chr1	160681908	160682108	Promoter	CD48
chr1	160682555	160682755	Promoter	CD48
chr1	160683007	160683207	Promoter	CD48
chr1	161039595	161039795	Promoter	ARHGAP30
chr1	161164953	161165153	Promoter	NDUFS2
chr1	161996641	161996841	Promoter	OLFML2B
chr1	162328024	162328224	Promoter	NOS1AP
chr1	162331701	162331901	Promoter	NOS1AP
chr1	162382900	162383100	Promoter	SH2D1B
chr1	165326169	165326369	Promoter	LMX1A
chr1	165326227	165326427	Promoter	LMX1A
chr1	167487296	167487496	Promoter	CD247
chr1	167487771	167487971	Promoter	CD247
chr1	167598893	167599093	Promoter	RCSD1
chr1	167599024	167599224	Promoter	RCSD1
chr1	169677821	169678021	Promoter	SELL
chr1	172114319	172114519	Promoter	MIR199A2,DNM3OS
chr1	172627965	172628165	Promoter	FASLG
chr1	173174550	173174750	Promoter	TNFSF4
chr1	173174815	173175015	Promoter	TNFSF4
chr1	173174820	173175020	Promoter	TNFSF4
chr1	175036587	175036787	Promoter	TNN
chr1	181204297	181204497	Promoter	GM140
chr1	183274561	183274761	Promoter	NMNAT2
chr1	185307995	185308195	Promoter	GS1-279B7.1
chr1	185308535	185308735	Promoter	GS1-279B7.1
chr1	192544802	192545002	Promoter	RGS1
chr1	196620863	196621063	Promoter	CFH
chr1	196945430	196945630	Promoter	CFHR5
chr1	197747784	197747984	Promoter	DENND1B
chr1	198608063	198608263	Promoter	PTPRC
chr1	198608261	198608461	Promoter	PTPRC
chr1	198608283	198608483	Promoter	PTPRC
chr1	200994878	200995078	Promoter	KIF21B
chr1	201684867	201685067	Promoter	MIR5191
chr1	201688319	201688519	Promoter	MIR5191
chr1	202128582	202128782	Promoter	PTPN7
chr1	202129092	202129292	Promoter	PTPN7
chr1	202129104	202129304	Promoter	PTPN7
chr1	202129155	202129355	Promoter	PTPN7
chr1	202130820	202131020	Promoter	PTPN7
chr1	202131084	202131284	Promoter	PTPN7
chr1	203147267	203147467	Promoter	MYBPH
chr1	203733814	203734014	Promoter	LAX1
chr1	203734156	203734356	Promoter	LAX1
chr1	203734162	203734362	Promoter	LAX1
chr1	203734296	203734496	Promoter	LAX1
chr1	203734378	203734578	Promoter	LAX1
chr1	203734405	203734605	Promoter	LAX1
chr1	204338415	204338615	Promoter	LINC00628
chr1	204482606	204482806	Promoter	MDM4
chr1	206945824	206946024	Promoter	IL10
chr1	207002561	207002761	Promoter	IL19
chr1	207095053	207095253	Promoter	FAIM3
chr1	207095157	207095357	Promoter	FAIM3
chr1	207095215	207095415	Promoter	FAIM3
chr1	207095232	207095432	Promoter	FAIM3
chr1	207095305	207095505	Promoter	FAIM3
chr1	207095478	207095678	Promoter	FAIM3
chr1	207095568	207095768	Promoter	FAIM3
chr1	207096258	207096458	Promoter	FAIM3
chr1	207143433	207143633	Promoter	FCAMR
chr1	207143961	207144161	Promoter	FCAMR
chr1	207144548	207144748	Promoter	FCAMR
chr1	208084842	208085042	Promoter	CD34
chr1	209877240	209877440	Promoter	HSD11B1
chr1	209877282	209877482	Promoter	HSD11B1
chr1	209877338	209877538	Promoter	HSD11B1
chr1	209928795	209928995	Promoter	TRAF3IP3
chr1	209929337	209929537	Promoter	TRAF3IP3
chr1	209929396	209929596	Promoter	TRAF3IP3
chr1	209929522	209929722	Promoter	TRAF3IP3
chr1	211666029	211666229	Promoter	RD3
chr1	214157836	214158036	Promoter	PROX1
chr1	218216579	218216779	Promoter	LOC101929631
chr1	220959986	220960186	Promoter	2001-03-01
chr1	226132741	226132941	Promoter	LEFTY2
chr1	226862807	226863007	Promoter	ITPKB-IT1
chr1	226862815	226863015	Promoter	ITPKB-IT1
chr1	226862859	226863059	Promoter	ITPKB-IT1
chr1	226863038	226863238	Promoter	ITPKB-IT1
chr1	226866357	226866557	Promoter	ITPKB-IT1
chr1	231295686	231295886	Promoter	TRIM67
chr1	235099306	235099506	Promoter	LOC101927851
chr1	236019340	236019540	Promoter	MIR1537
chr1	238054252	238054452	Promoter	ZP4
chr1	238054469	238054669	Promoter	ZP4
chr1	239882740	239882940	Promoter	CHRM3-AS2
chr1	239882777	239882977	Promoter	CHRM3-AS2
chr1	239883364	239883564	Promoter	CHRM3-AS2
chr1	240776679	240776879	Promoter	GREM2
chr1	247579212	247579412	Promoter	NLRP3
chr1	247579219	247579419	Promoter	NLRP3
chr1	247579339	247579539	Promoter	NLRP3
chr1	247579508	247579708	Promoter	NLRP3
chr1	247711495	247711695	Promoter	GCSAML
chr1	247712040	247712240	Promoter	GCSAML
chr1	247712137	247712337	Promoter	GCSAML
chr1	247712277	247712477	Promoter	GCSAML
chr1	247712283	247712483	Promoter	GCSAML
chr1	248651673	248651873	Promoter	OR2T5
chr1	248722808	248723008	Promoter	OR2T29
chr1	248815470	248815670	Promoter	OR2T27
chr1	249128779	249128979	Promoter	ZNF672
chr2	6773990	6774190	Promoter	LINC01246
chr2	8469835	8470035	Promoter	LINC00299
chr2	8469942	8470142	Promoter	LINC00299
chr2	10221085	10221285	Promoter	CYS1
chr2	10258292	10258492	Promoter	RRM2
chr2	10438386	10438586	Promoter	HPCAL1
chr2	10470023	10470223	Promoter	HPCAL1
chr2	10470042	10470242	Promoter	HPCAL1
chr2	10470182	10470382	Promoter	HPCAL1
chr2	10587527	10587727	Promoter	LOC101929715,SNORA80B,ODC1
chr2	10856872	10857072	Promoter	ATP6V1C2
chr2	11606845	11607045	Promoter	E2F6
chr2	11606942	11607142	Promoter	E2F6
chr2	20795812	20796012	Promoter	HS1BP3-IT1
chr2	25393877	25394077	Promoter	POMC
chr2	27298243	27298443	Promoter	EMILIN1,OST4
chr2	27719444	27719644	Promoter	GCKR,FNDC4
chr2	31444582	31444782	Promoter	CAPN14
chr2	32489965	32490165	Promoter	NLRC4
chr2	38056795	38056995	Promoter	LINC00211
chr2	38107701	38107901	Promoter	LINC00211
chr2	38264863	38265063	Promoter	RMDN2-AS1
chr2	44585766	44585966	Promoter	CAMKMT
chr2	45238342	45238542	Promoter	SIX2
chr2	47041402	47041602	Promoter	LINC01118
chr2	47054733	47054933	Promoter	LINC01119
chr2	47054863	47055063	Promoter	LINC01119
chr2	48540793	48540993	Promoter	FOXN2
chr2	48795894	48796094	Promoter	STON1-GTF2A1L
chr2	54751885	54752085	Promoter	RPL23AP32
chr2	55455248	55455448	Promoter	RPS27A
chr2	55509679	55509879	Promoter	PRORSD1P
chr2	55509843	55510043	Promoter	PRORSD1P
chr2	56212645	56212845	Promoter	MIR217
chr2	59444655	59444855	Promoter	LOC101927285
chr2	60618455	60618655	Promoter	MIR4432
chr2	60618504	60618704	Promoter	MIR4432
chr2	61646407	61646607	Promoter	SNORA70B
chr2	66589802	66590002	Promoter	MIR4778
chr2	66665328	66665528	Promoter	MEIS1-AS3
chr2	66796592	66796792	Promoter	LOC100507073
chr2	66801299	66801499	Promoter	LOC100507073
chr2	68592275	68592475	Promoter	PLEK
chr2	68592294	68592494	Promoter	PLEK
chr2	68961855	68962055	Promoter	ARHGAP25
chr2	68961887	68962087	Promoter	ARHGAP25
chr2	68961912	68962112	Promoter	ARHGAP25
chr2	68997541	68997741	Promoter	ARHGAP25
chr2	68998494	68998694	Promoter	ARHGAP25
chr2	69001524	69001724	Promoter	ARHGAP25
chr2	69001565	69001765	Promoter	ARHGAP25
chr2	69001674	69001874	Promoter	ARHGAP25
chr2	69001715	69001915	Promoter	ARHGAP25
chr2	69001754	69001954	Promoter	ARHGAP25
chr2	69002144	69002344	Promoter	ARHGAP25
chr2	69002278	69002478	Promoter	ARHGAP25
chr2	74758136	74758336	Promoter	DQX1,AUP1
chr2	77212435	77212635	Promoter	LOC101927907
chr2	85811136	85811336	Promoter	VAMP5
chr2	86424149	86424349	Promoter	MIR4779,MRPL35,IMMT
chr2	86855500	86855700	Promoter	RNF103
chr2	97408699	97408899	Promoter	LMAN2L
chr2	98329920	98330120	Promoter	ZAP70
chr2	99351450	99351650	Promoter	MGAT4A
chr2	100758914	100759114	Promoter	AFF3
chr2	100759034	100759234	Promoter	AFF3
chr2	100759059	100759259	Promoter	AFF3
chr2	102091575	102091775	Promoter	RFX8
chr2	102091655	102091855	Promoter	RFX8
chr2	102754919	102755119	Promoter	IL1R1
chr2	103035127	103035327	Promoter	IL18RAP
chr2	106757474	106757674	Promoter	UXS1
chr2	110367267	110367467	Promoter	SOWAHC
chr2	113398452	113398652	Promoter	SLC20A1
chr2	113404561	113404761	Promoter	FLJ42351
chr2	113404578	113404778	Promoter	FLJ42351
chr2	113404828	113405028	Promoter	FLJ42351
chr2	113405025	113405225	Promoter	FLJ42351
chr2	113885016	113885216	Promoter	IL1RN
chr2	119608021	119608221	Promoter	EN1
chr2	119609492	119609692	Promoter	EN1
chr2	119609542	119609742	Promoter	EN1
chr2	119609591	119609791	Promoter	EN1
chr2	119610426	119610626	Promoter	EN1
chr2	119698168	119698368	Promoter	MARCO
chr2	119699582	119699782	Promoter	MARCO
chr2	120186122	120186322	Promoter	TMEM37
chr2	130956019	130956219	Promoter	TUBA3E
chr2	131673863	131674063	Promoter	ARHGEF4
chr2	131674049	131674249	Promoter	ARHGEF4
chr2	131674075	131674275	Promoter	ARHGEF4
chr2	131674101	131674301	Promoter	ARHGEF4
chr2	134199631	134199831	Promoter	MIR7853
chr2	136577554	136577754	Promoter	LOC100507600
chr2	136577632	136577832	Promoter	LOC100507600
chr2	136577647	136577847	Promoter	LOC100507600
chr2	138717842	138718042	Promoter	HNMT
chr2	143886467	143886667	Promoter	ARHGAP15
chr2	143886485	143886685	Promoter	ARHGAP15
chr2	143886840	143887040	Promoter	ARHGAP15
chr2	151480511	151480711	Promoter	LOC101929282
chr2	151484339	151484539	Promoter	LOC101929282
chr2	157291162	157291362	Promoter	GPD2
chr2	158300375	158300575	Promoter	CYTIP
chr2	158300385	158300585	Promoter	CYTIP
chr2	158300711	158300911	Promoter	CYTIP
chr2	158300860	158301060	Promoter	CYTIP
chr2	163100892	163101092	Promoter	FAP
chr2	167005740	167005940	Promoter	SCN1A
chr2	167005951	167006151	Promoter	SCN1A
chr2	167343674	167343874	Promoter	SCN7A
chr2	168674669	168674869	Promoter	B3GALT1
chr2	170364058	170364258	Promoter	KLHL41
chr2	172945174	172945374	Promoter	DLX1
chr2	172945228	172945428	Promoter	DLX1
chr2	175354957	175355157	Promoter	GPR155
chr2	175499013	175499213	Promoter	WIPF1
chr2	175499265	175499465	Promoter	WIPF1
chr2	175499277	175499477	Promoter	WIPF1
chr2	175629535	175629735	Promoter	CHRNA1
chr2	179914527	179914727	Promoter	CCDC141
chr2	179914764	179914964	Promoter	CCDC141
chr2	182170397	182170597	Promoter	MIR4437
chr2	182171370	182171570	Promoter	MIR4437
chr2	182174240	182174440	Promoter	MIR4437
chr2	182321182	182321382	Promoter	ITGA4
chr2	182321254	182321454	Promoter	ITGA4
chr2	182321273	182321473	Promoter	ITGA4
chr2	183387785	183387985	Promoter	PDE1A
chr2	188419468	188419668	Promoter	TFPI
chr2	189843037	189843237	Promoter	MIR1245B,MIR1245A
chr2	190522501	190522701	Promoter	ASNSD1
chr2	190522664	190522864	Promoter	ASNSD1
chr2	191883383	191883583	Promoter	STAT1
chr2	192017640	192017840	Promoter	STAT4
chr2	197124688	197124888	Promoter	LOC101927482
chr2	197124725	197124925	Promoter	LOC101927482
chr2	198169719	198169919	Promoter	ANKRD44-IT1
chr2	201993695	201993895	Promoter	CFLAR
chr2	201995629	201995829	Promoter	CFLAR
chr2	202118026	202118226	Promoter	CASP8
chr2	202124988	202125188	Promoter	CASP8
chr2	202124992	202125192	Promoter	CASP8
chr2	202125075	202125275	Promoter	CASP8
chr2	202125112	202125312	Promoter	CASP8
chr2	204571046	204571246	Promoter	CD28
chr2	204571115	204571315	Promoter	CD28
chr2	204801313	204801513	Promoter	ICOS
chr2	207082544	207082744	Promoter	GPR1
chr2	208000116	208000316	Promoter	KLF7
chr2	208390116	208390316	Promoter	CREB1
chr2	210444128	210444328	Promoter	MAP2
chr2	210444170	210444370	Promoter	MAP2
chr2	210444375	210444575	Promoter	MAP2
chr2	219723167	219723367	Promoter	WNT6
chr2	223912442	223912642	Promoter	KCNE4
chr2	225266556	225266756	Promoter	FAM124B
chr2	225266625	225266825	Promoter	FAM124B
chr2	225266633	225266833	Promoter	FAM124B
chr2	225266683	225266883	Promoter	FAM124B
chr2	225266743	225266943	Promoter	FAM124B
chr2	225266776	225266976	Promoter	FAM124B
chr2	225266860	225267060	Promoter	FAM124B
chr2	225811510	225811710	Promoter	DOCK10
chr2	225811540	225811740	Promoter	DOCK10
chr2	225811569	225811769	Promoter	DOCK10
chr2	225811638	225811838	Promoter	DOCK10
chr2	225811838	225812038	Promoter	DOCK10
chr2	225812374	225812574	Promoter	DOCK10
chr2	231090431	231090631	Promoter	SP140,SP110
chr2	231090540	231090740	Promoter	SP140,SP110
chr2	231090645	231090845	Promoter	SP140,SP110
chr2	231090955	231091155	Promoter	SP110
chr2	231092021	231092221	Promoter	SP110
chr2	231191562	231191762	Promoter	SP140L
chr2	231191627	231191827	Promoter	SP140L
chr2	232258263	232258463	Promoter	B3GNT7
chr2	232756980	232757180	Promoter	MIR1471
chr2	233924689	233924889	Promoter	INPP5D
chr2	233924701	233924901	Promoter	INPP5D
chr2	233924752	233924952	Promoter	INPP5D
chr2	233924901	233925101	Promoter	INPP5D
chr2	233924930	233925130	Promoter	INPP5D
chr2	237418797	237418997	Promoter	IQCA1
chr2	238392010	238392210	Promoter	MLPH
chr2	241560907	241561107	Promoter	GPR35
chr2	241561137	241561337	Promoter	GPR35
chr2	242557279	242557479	Promoter	THAP4
chr2	242805862	242806062	Promoter	PDCD1
chr2	242908118	242908318	Promoter	LOC102723927
chr2	242908234	242908434	Promoter	LOC102723927
chr2	242908294	242908494	Promoter	LOC102723927
chr3	1132928	1133128	Promoter	CNTN6
chr3	11766369	11766569	Promoter	VGLL4
chr3	15541801	15542001	Promoter	MIR4270,COLQ
chr3	25499005	25499205	Promoter	RARB
chr3	30644546	30644746	Promoter	TGFBR2
chr3	31741090	31741290	Promoter	OSBPL10-AS1
chr3	32432542	32432742	Promoter	CMTM7
chr3	32992963	32993163	Promoter	CCR4
chr3	32993065	32993265	Promoter	CCR4
chr3	33763405	33763605	Promoter	CLASP2
chr3	38080250	38080450	Promoter	DLEC1
chr3	44155037	44155237	Promoter	MIR138-1
chr3	45957166	45957366	Promoter	LZTFL1
chr3	46249695	46249895	Promoter	CCR1
chr3	46249885	46250085	Promoter	CCR1
chr3	46249924	46250124	Promoter	CCR1
chr3	46410122	46410322	Promoter	CCR5
chr3	46410322	46410522	Promoter	CCR5
chr3	46447984	46448184	Promoter	CCRL2,LOC102724297
chr3	46448034	46448234	Promoter	CCRL2,LOC102724297
chr3	46448602	46448802	Promoter	CCRL2,LOC102724297
chr3	46448653	46448853	Promoter	CCRL2,LOC102724297
chr3	46448768	46448968	Promoter	CCRL2,LOC102724297
chr3	46448820	46449020	Promoter	CCRL2,LOC102724297
chr3	46448863	46449063	Promoter	CCRL2,LOC102724297
chr3	46449095	46449295	Promoter	CCRL2,LOC102724297
chr3	48598580	48598780	Promoter	PFKFB4
chr3	50376055	50376255	Promoter	RASSF1
chr3	52316134	52316334	Promoter	WDR82
chr3	52347840	52348040	Promoter	DNAH1
chr3	52828293	52828493	Promoter	ITIH3
chr3	52873058	52873258	Promoter	MUSTN1
chr3	55518031	55518231	Promoter	WNT5A
chr3	55518698	55518898	Promoter	WNT5A
chr3	55694619	55694819	Promoter	ERC2-IT1
chr3	56836461	56836661	Promoter	ARHGEF3
chr3	56951817	56952017	Promoter	ARHGEF3
chr3	58218315	58218515	Promoter	ABHD6
chr3	64676909	64677109	Promoter	ADAMTS9
chr3	67705947	67706147	Promoter	SUCLG2
chr3	98449321	98449521	Promoter	ST3GAL6
chr3	100328086	100328286	Promoter	GPR128
chr3	101441333	101441533	Promoter	CEP97
chr3	107844314	107844514	Promoter	LINC01215
chr3	107844661	107844861	Promoter	LINC01215
chr3	108541405	108541605	Promoter	TRAT1
chr3	111315287	111315487	Promoter	ZBED2
chr3	112218157	112218357	Promoter	BTLA
chr3	112218661	112218861	Promoter	BTLA
chr3	112323519	112323719	Promoter	LINC01279
chr3	112324201	112324401	Promoter	LINC01279
chr3	114010159	114010359	Promoter	TIGIT
chr3	114465656	114465856	Promoter	MIR4796
chr3	116428510	116428710	Promoter	TUSC7
chr3	118865827	118866027	Promoter	IGSF11
chr3	118866032	118866232	Promoter	IGSF11
chr3	119281192	119281392	Promoter	CD80
chr3	119963830	119964030	Promoter	GPR156
chr3	120118330	120118530	Promoter	MIR198
chr3	121379645	121379845	Promoter	HCLS1
chr3	121379677	121379877	Promoter	HCLS1
chr3	121379691	121379891	Promoter	HCLS1
chr3	121796527	121796727	Promoter	CD86
chr3	122296309	122296509	Promoter	PARP15
chr3	123407470	123407670	Promoter	MYLK-AS2
chr3	124933790	124933990	Promoter	SLC12A8
chr3	128995379	128995579	Promoter	HMCES
chr3	129244195	129244395	Promoter	RHO
chr3	130060973	130061173	Promoter	COL6A5
chr3	136537069	136537269	Promoter	SLC35G2
chr3	136537167	136537367	Promoter	SLC35G2
chr3	136537507	136537707	Promoter	SLC35G2
chr3	136537609	136537809	Promoter	SLC35G2
chr3	141204907	141205107	Promoter	RASA2
chr3	143686517	143686717	Promoter	C3orf58
chr3	150920864	150921064	Promoter	GPR171
chr3	150920951	150921151	Promoter	GPR171
chr3	150996171	150996371	Promoter	P2RY14
chr3	150996197	150996397	Promoter	P2RY14
chr3	151589411	151589611	Promoter	SUCNR1
chr3	160121721	160121921	Promoter	IFT80,MIR15B,MIR16-2
chr3	171531998	171532198	Promoter	PLD1
chr3	171753911	171754111	Promoter	FNDC3B
chr3	179326721	179326921	Promoter	MRPL47
chr3	183273145	183273345	Promoter	KLHL6
chr3	183273342	183273542	Promoter	KLHL6
chr3	183273394	183273594	Promoter	KLHL6
chr3	183273457	183273657	Promoter	KLHL6
chr3	183273641	183273841	Promoter	KLHL6
chr3	183273707	183273907	Promoter	KLHL6
chr3	183273794	183273994	Promoter	KLHL6
chr3	187086430	187086630	Promoter	RTP4
chr3	187389315	187389515	Promoter	SST
chr3	189348574	189348774	Promoter	TP63
chr3	190105886	190106086	Promoter	CLDN16
chr3	194120849	194121049	Promoter	GP5
chr3	194868327	194868527	Promoter	XXYLT1-AS2
chr3	194868338	194868538	Promoter	XXYLT1-AS2
chr3	194868407	194868607	Promoter	XXYLT1-AS2
chr3	194868650	194868850	Promoter	XXYLT1-AS2
chr3	194868690	194868890	Promoter	XXYLT1-AS2
chr3	195542453	195542653	Promoter	MUC4
chr3	196068118	196068318	Promoter	TM4SF19,TM4SF19-TCTEX1D2
chr4	121468	121668	Promoter	ZNF718
chr4	2813692	2813892	Promoter	SH3BP2
chr4	2813964	2814164	Promoter	SH3BP2
chr4	2814022	2814222	Promoter	SH3BP2
chr4	10686313	10686513	Promoter	CLNK
chr4	10686357	10686557	Promoter	CLNK
chr4	10686510	10686710	Promoter	CLNK
chr4	17815803	17816003	Promoter	DCAF16
chr4	24795730	24795930	Promoter	SOD3
chr4	36257179	36257379	Promoter	LOC439933
chr4	36258030	36258230	Promoter	LOC439933
chr4	36258105	36258305	Promoter	LOC439933
chr4	38807159	38807359	Promoter	TLR1
chr4	38807237	38807437	Promoter	TLR1
chr4	38807282	38807482	Promoter	TLR1
chr4	39034172	39034372	Promoter	TMEM156
chr4	39035383	39035583	Promoter	TMEM156
chr4	40198292	40198492	Promoter	RHOH
chr4	40198370	40198570	Promoter	RHOH
chr4	40198381	40198581	Promoter	RHOH
chr4	40198386	40198586	Promoter	RHOH
chr4	40198495	40198695	Promoter	RHOH
chr4	40198559	40198759	Promoter	RHOH
chr4	40198676	40198876	Promoter	RHOH
chr4	57972484	57972684	Promoter	IGFBP7-AS1
chr4	68424395	68424595	Promoter	STAP1
chr4	77226317	77226517	Promoter	STBD1
chr4	83826591	83826791	Promoter	THAP9-AS1
chr4	84034054	84034254	Promoter	PLAC8
chr4	86850008	86850208	Promoter	ARHGAP24
chr4	86850021	86850221	Promoter	ARHGAP24
chr4	86850234	86850434	Promoter	ARHGAP24
chr4	86850278	86850478	Promoter	ARHGAP24
chr4	86851311	86851511	Promoter	ARHGAP24
chr4	86851325	86851525	Promoter	ARHGAP24
chr4	90815873	90816073	Promoter	MMRN1
chr4	96012217	96012417	Promoter	BMPR1B
chr4	99853784	99853984	Promoter	EIF4E
chr4	100213545	100213745	Promoter	ADH1A
chr4	103246019	103246219	Promoter	SLC39A8
chr4	106471366	106471566	Promoter	ARHGEF38
chr4	141177519	141177719	Promoter	SCOC
chr4	142055585	142055785	Promoter	RNF150
chr4	153021429	153021629	Promoter	LOC100996286
chr4	153021878	153022078	Promoter	LOC100996286
chr4	156679849	156680049	Promoter	GUCY1B3
chr4	159130491	159130691	Promoter	TMEM144
chr4	164534541	164534741	Promoter	2001-03-01
chr4	165797566	165797766	Promoter	APELA
chr4	176710052	176710252	Promoter	LOC101928590,GPM6A
chr4	183089525	183089725	Promoter	MIR1305
chr5	3537115	3537315	Promoter	LINC01019
chr5	32709201	32709401	Promoter	NPR3
chr5	32709237	32709437	Promoter	NPR3
chr5	32709296	32709496	Promoter	NPR3
chr5	35118097	35118297	Promoter	PRLR
chr5	35118167	35118367	Promoter	PRLR
chr5	35118200	35118400	Promoter	PRLR
chr5	35852566	35852766	Promoter	IL7R
chr5	39270615	39270815	Promoter	FYB
chr5	39274662	39274862	Promoter	FYB
chr5	40905155	40905355	Promoter	C7
chr5	42547012	42547212	Promoter	GHR
chr5	42547302	42547502	Promoter	GHR
chr5	43039310	43039510	Promoter	LOC153684
chr5	50265807	50266007	Promoter	LOC100287592
chr5	50266096	50266296	Promoter	LOC100287592
chr5	50266294	50266494	Promoter	LOC100287592
chr5	54040262	54040462	Promoter	LOC102467080
chr5	54397492	54397692	Promoter	GZMA
chr5	54834555	54834755	Promoter	RNF138P1,PPAP2A
chr5	56946661	56946861	Promoter	LOC101928505
chr5	60624129	60624329	Promoter	ZSWIM6
chr5	61874591	61874791	Promoter	IPO11-LRRC70
chr5	71803408	71803608	Promoter	ZNF366
chr5	73617280	73617480	Promoter	LINC01333
chr5	78281719	78281919	Promoter	ARSB
chr5	80253900	80254100	Promoter	RASGRF2
chr5	86042449	86042649	Promoter	LOC100505878
chr5	88123051	88123251	Promoter	MEF2C
chr5	94419459	94419659	Promoter	MCTP1
chr5	95159027	95159227	Promoter	GLRX
chr5	95159265	95159465	Promoter	GLRX
chr5	95159323	95159523	Promoter	GLRX
chr5	95159514	95159714	Promoter	GLRX
chr5	95159539	95159739	Promoter	GLRX
chr5	96839054	96839254	Promoter	LINC01340
chr5	111313848	111314048	Promoter	NREP
chr5	117931595	117931795	Promoter	LOC102467225
chr5	118689855	118690055	Promoter	TNFAIP8
chr5	119799120	119799320	Promoter	PRR16
chr5	121414923	121415123	Promoter	LOX
chr5	121495731	121495931	Promoter	LOC100505841
chr5	131409252	131409452	Promoter	CSF2
chr5	133772697	133772897	Promoter	LOC102546229
chr5	133839258	133839458	Promoter	LOC101927934
chr5	134876492	134876692	Promoter	NEUROG1
chr5	137073369	137073569	Promoter	KLHL3
chr5	138210649	138210849	Promoter	CTNNA1,LRRTM2
chr5	138725730	138725930	Promoter	MZB1
chr5	138725875	138726075	Promoter	MZB1
chr5	138735148	138735348	Promoter	PROB1
chr5	143191563	143191763	Promoter	HMHB1
chr5	143191576	143191776	Promoter	HMHB1
chr5	143191671	143191871	Promoter	HMHB1
chr5	148783852	148784052	Promoter	MIR143HG
chr5	148784073	148784273	Promoter	MIR143HG
chr5	148809961	148810161	Promoter	MIR145
chr5	149792683	149792883	Promoter	CD74
chr5	156536007	156536207	Promoter	HAVCR2
chr5	156607693	156607893	Promoter	ITK
chr5	160280240	160280440	Promoter	ATP10B
chr5	169724490	169724690	Promoter	LCP2
chr5	169724556	169724756	Promoter	LCP2
chr5	169724668	169724868	Promoter	LCP2
chr5	169724691	169724891	Promoter	LCP2
chr5	169724703	169724903	Promoter	LCP2
chr5	169725000	169725200	Promoter	LCP2
chr5	169757955	169758155	Promoter	LINC01366
chr5	173759928	173760128	Promoter	LINC01411
chr5	176166461	176166661	Promoter	LOC102577424
chr5	176326416	176326616	Promoter	HK3
chr5	176837751	176837951	Promoter	F12
chr5	180231094	180231294	Promoter	MGAT1
chr5	180336495	180336695	Promoter	BTNL8
chr5	180336749	180336949	Promoter	BTNL8
chr5	180580929	180581129	Promoter	OR2V2
chr6	209663	209863	Promoter	LOC285766
chr6	1102232	1102432	Promoter	LOC285768
chr6	2752260	2752460	Promoter	MYLK4
chr6	2858115	2858315	Promoter	MIR4645
chr6	2876662	2876862	Promoter	SERPINB9P1
chr6	2976664	2976864	Promoter	SERPINB6
chr6	3075908	3076108	Promoter	RIPK1
chr6	3848118	3848318	Promoter	FAM50B
chr6	6588746	6588946	Promoter	LY86
chr6	10421360	10421560	Promoter	TFAP2A
chr6	10421570	10421770	Promoter	TFAP2A
chr6	10421765	10421965	Promoter	TFAP2A
chr6	10421967	10422167	Promoter	TFAP2A
chr6	10422039	10422239	Promoter	TFAP2A
chr6	10422222	10422422	Promoter	TFAP2A
chr6	10422347	10422547	Promoter	TFAP2A
chr6	10422536	10422736	Promoter	TFAP2A
chr6	10422774	10422974	Promoter	TFAP2A
chr6	11039433	11039633	Promoter	ELOVL2-AS1
chr6	11382453	11382653	Promoter	NEDD9
chr6	11382456	11382656	Promoter	NEDD9
chr6	22147283	22147483	Promoter	CASC14
chr6	24936146	24936346	Promoter	FAM65B
chr6	24936274	24936474	Promoter	FAM65B
chr6	24936865	24937065	Promoter	FAM65B
chr6	25041812	25042012	Promoter	FAM65B
chr6	25041923	25042123	Promoter	FAM65B
chr6	25041990	25042190	Promoter	FAM65B
chr6	26361289	26361489	Promoter	BTN3A2
chr6	26367471	26367671	Promoter	BTN3A2
chr6	26367480	26367680	Promoter	BTN3A2
chr6	27729246	27729446	Promoter	LOC100131289
chr6	27880017	27880217	Promoter	OR2B2
chr6	28493501	28493701	Promoter	GPX5
chr6	29602290	29602490	Promoter	GABBR1
chr6	29717817	29718017	Promoter	HLA-F-AS1
chr6	30045180	30045380	Promoter	RNF39
chr6	30104340	30104540	Promoter	TRIM40
chr6	30104452	30104652	Promoter	TRIM40
chr6	30104493	30104693	Promoter	TRIM40
chr6	30130901	30131101	Promoter	TRIM15,TRIM10
chr6	31322814	31323014	Promoter	MIR6891
chr6	31323297	31323497	Promoter	MIR6891
chr6	31439312	31439512	Promoter	HCG26
chr6	31540361	31540561	Promoter	LTA,TNF
chr6	31542640	31542840	Promoter	TNF
chr6	31560524	31560724	Promoter	NCR3
chr6	31583815	31584015	Promoter	AIF1,PRRC2A
chr6	31705309	31705509	Promoter	CLIC1,MSH5,MSH5-SAPCD1
chr6	31765490	31765690	Promoter	VARS
chr6	32159974	32160174	Promoter	PBX2
chr6	32379405	32379605	Promoter	BTNL2
chr6	32407684	32407884	Promoter	HLA-DRA
chr6	32407738	32407938	Promoter	HLA-DRA
chr6	32808652	32808852	Promoter	TAP2,PSMB8-AS1
chr6	32813237	32813437	Promoter	PSMB8
chr6	32813341	32813541	Promoter	PSMB8
chr6	32813348	32813548	Promoter	PSMB8
chr6	32813422	32813622	Promoter	PSMB8
chr6	32813431	32813631	Promoter	PSMB8
chr6	32813444	32813644	Promoter	PSMB8
chr6	32813482	32813682	Promoter	PSMB8
chr6	32813615	32813815	Promoter	PSMB8
chr6	32822811	32823011	Promoter	TAP1
chr6	32909182	32909382	Promoter	HLA-DMB
chr6	32909340	32909540	Promoter	HLA-DMB
chr6	32909423	32909623	Promoter	HLA-DMB
chr6	32912191	32912391	Promoter	HLA-DMB
chr6	32912968	32913168	Promoter	HLA-DMB
chr6	32913025	32913225	Promoter	HLA-DMB
chr6	32920467	32920667	Promoter	HLA-DMA
chr6	32920557	32920757	Promoter	HLA-DMA
chr6	32920635	32920835	Promoter	HLA-DMA
chr6	33039381	33039581	Promoter	HLA-DPB1
chr6	33039400	33039600	Promoter	HLA-DPB1
chr6	33040435	33040635	Promoter	HLA-DPB1
chr6	33040510	33040710	Promoter	HLA-DPB1
chr6	33040814	33041014	Promoter	HLA-DPB1
chr6	33041243	33041443	Promoter	HLA-DPB1,HLA-DPA1
chr6	33044245	33044445	Promoter	HLA-DPA1
chr6	33080400	33080600	Promoter	HLA-DPB2
chr6	37470383	37470583	Promoter	CCDC167,LOC100505530
chr6	39282362	39282562	Promoter	KCNK17
chr6	41019812	41020012	Promoter	APOBEC2
chr6	41131763	41131963	Promoter	TREM2
chr6	41168701	41168901	Promoter	TREML2
chr6	44090648	44090848	Promoter	TMEM63B
chr6	45291743	45291943	Promoter	RUNX2
chr6	46143306	46143506	Promoter	ENPP5
chr6	52150356	52150556	Promoter	MCM3
chr6	53488536	53488736	Promoter	LOC101927171
chr6	75917460	75917660	Promoter	COL12A1
chr6	75918029	75918229	Promoter	COL12A1
chr6	75918065	75918265	Promoter	COL12A1
chr6	76205948	76206148	Promoter	FILIP1
chr6	101846503	101846703	Promoter	GRIK2
chr6	101846550	101846750	Promoter	GRIK2
chr6	101846607	101846807	Promoter	GRIK2
chr6	101846667	101846867	Promoter	GRIK2
chr6	101846705	101846905	Promoter	GRIK2
chr6	101846867	101847067	Promoter	GRIK2
chr6	101846958	101847158	Promoter	GRIK2
chr6	101847249	101847449	Promoter	GRIK2
chr6	106542366	106542566	Promoter	PRDM1
chr6	108145501	108145701	Promoter	SCML4
chr6	108145677	108145877	Promoter	SCML4
chr6	109245283	109245483	Promoter	ARMC2-AS1
chr6	109779958	109780158	Promoter	MICAL1
chr6	109780019	109780219	Promoter	MICAL1
chr6	112079889	112080089	Promoter	FYN
chr6	112081218	112081418	Promoter	FYN
chr6	112081438	112081638	Promoter	FYN
chr6	112557172	112557372	Promoter	LOC101927640
chr6	112557175	112557375	Promoter	LOC101927640
chr6	119031299	119031499	Promoter	CEP85L
chr6	128221953	128222153	Promoter	THEMIS
chr6	129203683	129203883	Promoter	LAMA2
chr6	129203787	129203987	Promoter	LAMA2
chr6	130536900	130537100	Promoter	SAMD3
chr6	132452353	132452553	Promoter	LINC01013
chr6	132454923	132455123	Promoter	LINC01013
chr6	133035135	133035335	Promoter	VNN1
chr6	133035185	133035385	Promoter	VNN1
chr6	133084542	133084742	Promoter	VNN2
chr6	134758704	134758904	Promoter	LINC01010
chr6	138191500	138191700	Promoter	LOC100130476
chr6	138192558	138192758	Promoter	LOC100130476
chr6	143928543	143928743	Promoter	PHACTR2
chr6	151560932	151561132	Promoter	AKAP12
chr6	152011411	152011611	Promoter	ESR1
chr6	152011556	152011756	Promoter	ESR1
chr6	152011566	152011766	Promoter	ESR1
chr6	154330978	154331178	Promoter	OPRM1
chr6	157948530	157948730	Promoter	MIR3692
chr6	157948676	157948876	Promoter	MIR3692
chr6	158400513	158400713	Promoter	SYNJ2
chr6	159066922	159067122	Promoter	DYNLT1,SYTL3
chr6	159069875	159070075	Promoter	DYNLT1,SYTL3
chr6	159070507	159070707	Promoter	DYNLT1,SYTL3
chr6	159070556	159070756	Promoter	DYNLT1,SYTL3
chr6	159070859	159071059	Promoter	SYTL3
chr6	159070908	159071108	Promoter	SYTL3
chr6	159071006	159071206	Promoter	SYTL3
chr6	159463003	159463203	Promoter	TAGAP
chr6	159463200	159463400	Promoter	TAGAP
chr6	159465118	159465318	Promoter	TAGAP
chr6	159465425	159465625	Promoter	TAGAP
chr6	160679874	160680074	Promoter	SLC22A2
chr6	166648700	166648900	Promoter	LOC101929297
chr6	166878582	166878782	Promoter	RPS6KA2-IT1
chr6	167043187	167043387	Promoter	RPS6KA2
chr6	170580985	170581185	Promoter	FLJ38122
chr6	170581148	170581348	Promoter	FLJ38122
chr6	170587894	170588094	Promoter	LOC285804
chr7	641237	641437	Promoter	LOC101926963
chr7	12624553	12624753	Promoter	SCIN
chr7	12624760	12624960	Promoter	SCIN
chr7	17336878	17337078	Promoter	AHR
chr7	18545811	18546011	Promoter	HDAC9
chr7	20259636	20259836	Promoter	MACC1
chr7	20827725	20827925	Promoter	SP8
chr7	20827882	20828082	Promoter	SP8
chr7	20829402	20829602	Promoter	SP8
chr7	20831218	20831418	Promoter	SP8
chr7	22765221	22765421	Promoter	IL6
chr7	22894695	22894895	Promoter	SNORD93
chr7	22894728	22894928	Promoter	SNORD93
chr7	22894798	22894998	Promoter	SNORD93
chr7	24611782	24611982	Promoter	MPP6
chr7	27175052	27175252	Promoter	HOXA4,HOXA-AS3
chr7	27277479	27277679	Promoter	EVX1
chr7	29184894	29185094	Promoter	CHN2
chr7	29186919	29187119	Promoter	CPVL
chr7	30951325	30951525	Promoter	AQP1
chr7	30960686	30960886	Promoter	AQP1
chr7	31725648	31725848	Promoter	PPP1R17
chr7	32114913	32115113	Promoter	PDE1C
chr7	39013576	39013776	Promoter	POU6F2
chr7	41731452	41731652	Promoter	INHBA-AS1
chr7	43796486	43796686	Promoter	BLVRA
chr7	45018558	45018758	Promoter	MYO1G
chr7	48124821	48125021	Promoter	UPP1
chr7	48127032	48127232	Promoter	UPP1
chr7	48127099	48127299	Promoter	UPP1
chr7	50346968	50347168	Promoter	IKZF1
chr7	50348074	50348274	Promoter	IKZF1
chr7	50348385	50348585	Promoter	IKZF1
chr7	50357033	50357233	Promoter	IKZF1
chr7	50357725	50357925	Promoter	IKZF1
chr7	50358094	50358294	Promoter	IKZF1
chr7	55606241	55606441	Promoter	VOPP1
chr7	55606305	55606505	Promoter	VOPP1
chr7	55606342	55606542	Promoter	VOPP1
chr7	64450826	64451026	Promoter	ZNF117
chr7	64467424	64467624	Promoter	ERV3-1
chr7	75443074	75443274	Promoter	CCL24
chr7	75443093	75443293	Promoter	CCL24
chr7	80266830	80267030	Promoter	CD36
chr7	93190236	93190436	Promoter	CALCR
chr7	93190362	93190562	Promoter	CALCR
chr7	96631480	96631680	Promoter	DLX6
chr7	96643586	96643786	Promoter	DLX6-AS1
chr7	96646979	96647179	Promoter	DLX6-AS1
chr7	96647017	96647217	Promoter	DLX6-AS1
chr7	96647223	96647423	Promoter	DLX6-AS1
chr7	96654682	96654882	Promoter	DLX5
chr7	96654686	96654886	Promoter	DLX5
chr7	96654688	96654888	Promoter	DLX5
chr7	96654732	96654932	Promoter	DLX5
chr7	96654831	96655031	Promoter	DLX5
chr7	96654944	96655144	Promoter	DLX5
chr7	96655005	96655205	Promoter	DLX5
chr7	96655401	96655601	Promoter	DLX5
chr7	96655466	96655666	Promoter	DLX5
chr7	96655698	96655898	Promoter	DLX5
chr7	96655789	96655989	Promoter	DLX5
chr7	100331391	100331591	Promoter	ZAN
chr7	100796709	100796909	Promoter	AP1S1
chr7	101005935	101006135	Promoter	COL26A1
chr7	101005958	101006158	Promoter	COL26A1
chr7	106505270	106505470	Promoter	PIK3CG
chr7	106505672	106505872	Promoter	PIK3CG
chr7	106505686	106505886	Promoter	PIK3CG
chr7	106505752	106505952	Promoter	PIK3CG
chr7	106505758	106505958	Promoter	PIK3CG
chr7	106505814	106506014	Promoter	PIK3CG
chr7	106505861	106506061	Promoter	PIK3CG
chr7	107644470	107644670	Promoter	LAMB1
chr7	107644856	107645056	Promoter	LAMB1
chr7	109600633	109600833	Promoter	EIF3IP1
chr7	112062197	112062397	Promoter	IFRD1
chr7	112062319	112062519	Promoter	IFRD1
chr7	128862033	128862233	Promoter	AHCYL2
chr7	129416953	129417153	Promoter	MIR96,MIR183
chr7	129417048	129417248	Promoter	MIR96,MIR183
chr7	129418370	129418570	Promoter	MIR96,MIR183
chr7	130793632	130793832	Promoter	MKLN1,LINC-PINT
chr7	134571394	134571594	Promoter	CALD1
chr7	134832031	134832231	Promoter	TMEM140
chr7	134832121	134832321	Promoter	TMEM140
chr7	134832332	134832532	Promoter	TMEM140
chr7	134832444	134832644	Promoter	TMEM140
chr7	134832571	134832771	Promoter	TMEM140
chr7	134832744	134832944	Promoter	TMEM140
chr7	134832750	134832950	Promoter	TMEM140
chr7	134832839	134833039	Promoter	TMEM140
chr7	134832931	134833131	Promoter	TMEM140
chr7	134833066	134833266	Promoter	TMEM140
chr7	135664752	135664952	Promoter	LUZP6,MTPN
chr7	148935961	148936161	Promoter	ZNF212
chr7	150130608	150130808	Promoter	LINC00996
chr7	150147453	150147653	Promoter	GIMAP8
chr7	150147555	150147755	Promoter	GIMAP8
chr7	150147642	150147842	Promoter	GIMAP8
chr7	150147822	150148022	Promoter	GIMAP8
chr7	150147827	150148027	Promoter	GIMAP8
chr7	150147888	150148088	Promoter	GIMAP8
chr7	150147925	150148125	Promoter	GIMAP8
chr7	150147973	150148173	Promoter	GIMAP8
chr7	150211661	150211861	Promoter	GIMAP7
chr7	150264211	150264411	Promoter	GIMAP4
chr7	150264667	150264867	Promoter	GIMAP4
chr7	150329349	150329549	Promoter	GIMAP6
chr7	150329386	150329586	Promoter	GIMAP6
chr7	150329431	150329631	Promoter	GIMAP6
chr7	150413464	150413664	Promoter	GIMAP1-GIMAP5
chr7	150434380	150434580	Promoter	GIMAP5
chr7	150548665	150548865	Promoter	AOC1
chr7	151037117	151037317	Promoter	NUB1
chr7	156807374	156807574	Promoter	MNX1
chr7	157647354	157647554	Promoter	LOC100506585
chr7	158329975	158330175	Promoter	MIR595
chr8	6783421	6783621	Promoter	DEFA6
chr8	6785602	6785802	Promoter	DEFA6
chr8	7783549	7783749	Promoter	ZNF705B
chr8	9182361	9182561	Promoter	LOC157273
chr8	11839744	11839944	Promoter	DEFB135
chr8	13372019	13372219	Promoter	DLC1
chr8	13372032	13372232	Promoter	DLC1
chr8	13372990	13373190	Promoter	DLC1
chr8	13373547	13373747	Promoter	DLC1
chr8	17555202	17555402	Promoter	MTUS1
chr8	17581146	17581346	Promoter	MTUS1
chr8	17581151	17581351	Promoter	MTUS1
chr8	21771152	21771352	Promoter	DOK2
chr8	21771178	21771378	Promoter	DOK2
chr8	21771440	21771640	Promoter	DOK2
chr8	21771568	21771768	Promoter	DOK2
chr8	22960157	22960357	Promoter	TNFRSF10C
chr8	23021617	23021817	Promoter	TNFRSF10D
chr8	25202810	25203010	Promoter	MIR6876
chr8	26725882	26726082	Promoter	ADRA1A
chr8	28174921	28175121	Promoter	PNOC
chr8	32297578	32297778	Promoter	NRG1-IT3
chr8	32503162	32503362	Promoter	NRG1
chr8	32504129	32504329	Promoter	NRG1
chr8	32577851	32578051	Promoter	NRG1
chr8	32578911	32579111	Promoter	NRG1
chr8	38008286	38008486	Promoter	STAR
chr8	38008391	38008591	Promoter	STAR
chr8	38008443	38008643	Promoter	STAR
chr8	39770275	39770475	Promoter	IDO1
chr8	39770385	39770585	Promoter	IDO1
chr8	39771350	39771550	Promoter	IDO1
chr8	41168105	41168305	Promoter	SFRP1
chr8	41169333	41169533	Promoter	SFRP1
chr8	49460491	49460691	Promoter	LOC101929268
chr8	57472934	57473134	Promoter	LINC00968
chr8	71380193	71380393	Promoter	LOC101926892
chr8	72751254	72751454	Promoter	LOC100132891
chr8	74903661	74903861	Promoter	LY96
chr8	74903701	74903901	Promoter	LY96
chr8	75260102	75260302	Promoter	GDAP1
chr8	75912088	75912288	Promoter	CRISPLD1
chr8	77591091	77591291	Promoter	ZFHX4
chr8	77596282	77596482	Promoter	ZFHX4-AS1
chr8	86371719	86371919	Promoter	CA2
chr8	91233468	91233668	Promoter	LINC00534
chr8	95229772	95229972	Promoter	CDH17
chr8	97175828	97176028	Promoter	GDF6
chr8	97400481	97400681	Promoter	LOC102724804
chr8	103135495	103135695	Promoter	MIR5680
chr8	103140665	103140865	Promoter	NCALD
chr8	104151035	104151235	Promoter	BAALC
chr8	104185401	104185601	Promoter	BAALC-AS1
chr8	118146318	118146518	Promoter	SLC30A8
chr8	119128578	119128778	Promoter	EXT1
chr8	125259590	125259790	Promoter	LOC101927588
chr8	125259714	125259914	Promoter	LOC101927588
chr8	126963407	126963607	Promoter	LINC00861
chr8	126963417	126963617	Promoter	LINC00861
chr8	128807741	128807941	Promoter	MIR1204
chr8	128807917	128808117	Promoter	MIR1204
chr8	128808094	128808294	Promoter	MIR1204
chr8	128899414	128899614	Promoter	PVT1
chr8	129060715	129060915	Promoter	MIR1207
chr8	131456958	131457158	Promoter	ASAP1
chr8	131457114	131457314	Promoter	ASAP1
chr8	133772642	133772842	Promoter	TMEM71
chr8	133772789	133772989	Promoter	TMEM71
chr8	133772993	133773193	Promoter	TMEM71
chr8	133875929	133876129	Promoter	TG
chr8	134058835	134059035	Promoter	MIR7848
chr8	134072426	134072626	Promoter	SLA
chr8	134072511	134072711	Promoter	SLA
chr8	134072606	134072806	Promoter	SLA
chr8	134073697	134073897	Promoter	SLA
chr8	142015072	142015272	Promoter	PTK2
chr8	143813188	143813388	Promoter	LOC100288181
chr8	144778730	144778930	Promoter	BREA2
chr8	145029503	145029703	Promoter	PLEC
chr8	145086143	145086343	Promoter	SPATC1
chr8	145086200	145086400	Promoter	SPATC1
chr8	145839359	145839559	Promoter	ARHGAP39
chr9	272158	272358	Promoter	DOCK8
chr9	272168	272368	Promoter	DOCK8
chr9	272938	273138	Promoter	DOCK8
chr9	14992072	14992272	Promoter	LOC389705
chr9	23823025	23823225	Promoter	ELAVL2
chr9	26954208	26954408	Promoter	IFT74
chr9	33749116	33749316	Promoter	PRSS3
chr9	34459944	34460144	Promoter	FAM219A
chr9	35619232	35619432	Promoter	CD72
chr9	35619485	35619685	Promoter	CD72
chr9	35619719	35619919	Promoter	CD72
chr9	35650461	35650661	Promoter	SIT1
chr9	35870388	35870588	Promoter	OR13J1
chr9	38622459	38622659	Promoter	ANKRD18A
chr9	71161508	71161708	Promoter	LINC01506
chr9	71161729	71161929	Promoter	LINC01506
chr9	79631637	79631837	Promoter	FOXB2
chr9	79631806	79632006	Promoter	FOXB2
chr9	79632125	79632325	Promoter	FOXB2
chr9	92096195	92096395	Promoter	SEMA4D
chr9	95726133	95726333	Promoter	FGD3
chr9	95726347	95726547	Promoter	FGD3
chr9	96937997	96938197	Promoter	MIRLET7A1,MIRLET7F1,MIRLET7D
chr9	98879957	98880157	Promoter	LOC158434
chr9	100159680	100159880	Promoter	LOC286359
chr9	100700817	100701017	Promoter	HEMGN
chr9	106760482	106760682	Promoter	LOC101928523
chr9	112085969	112086169	Promoter	EPB41L4B
chr9	116355521	116355721	Promoter	RGS3
chr9	116840725	116840925	Promoter	AMBP
chr9	117692645	117692845	Promoter	TNFSF8
chr9	117692875	117693075	Promoter	TNFSF8
chr9	117692910	117693110	Promoter	TNFSF8
chr9	117692971	117693171	Promoter	TNFSF8
chr9	120466535	120466735	Promoter	TLR4
chr9	120466540	120466740	Promoter	TLR4
chr9	123688615	123688815	Promoter	TRAF1
chr9	123688645	123688845	Promoter	TRAF1
chr9	123688785	123688985	Promoter	TRAF1
chr9	123689093	123689293	Promoter	TRAF1
chr9	127019607	127019807	Promoter	NEK6
chr9	129372249	129372449	Promoter	LMX1B
chr9	129372874	129373074	Promoter	LMX1B
chr9	130473496	130473696	Promoter	TTC16
chr9	130540841	130541041	Promoter	SH2D3C
chr9	130541024	130541224	Promoter	SH2D3C
chr9	130541352	130541552	Promoter	SH2D3C
chr9	130541678	130541878	Promoter	SH2D3C
chr9	131872479	131872679	Promoter	PPP2R4,CRAT
chr9	134151419	134151619	Promoter	FAM78A
chr9	139892268	139892468	Promoter	CLIC3
chr9	139892431	139892631	Promoter	CLIC3
chr9	140172090	140172290	Promoter	TOR4A
chr9	140356657	140356857	Promoter	NSMF
chr10	4289062	4289262	Promoter	LINC00702
chr10	5064296	5064496	Promoter	AKR1C2
chr10	5859360	5859560	Promoter	GDI2
chr10	6190551	6190751	Promoter	MIR3155A
chr10	8093139	8093339	Promoter	GATA3
chr10	8093276	8093476	Promoter	GATA3
chr10	8093303	8093503	Promoter	GATA3
chr10	8093316	8093516	Promoter	GATA3
chr10	8093993	8094193	Promoter	GATA3-AS1,GATA3
chr10	8094042	8094242	Promoter	GATA3-AS1,GATA3
chr10	8094331	8094531	Promoter	GATA3-AS1,GATA3
chr10	8094434	8094634	Promoter	GATA3-AS1,GATA3
chr10	8094541	8094741	Promoter	GATA3-AS1,GATA3
chr10	8094579	8094779	Promoter	GATA3-AS1,GATA3
chr10	11204858	11205058	Promoter	CELF2
chr10	13258881	13259081	Promoter	RNU6-2
chr10	14614100	14614300	Promoter	FAM107B
chr10	15211966	15212166	Promoter	NMT2
chr10	26726737	26726937	Promoter	APBB1IP
chr10	29892029	29892229	Promoter	MIR938
chr10	31288187	31288387	Promoter	ZNF438
chr10	33248985	33249185	Promoter	ITGB1
chr10	34061497	34061697	Promoter	LINC00838
chr10	44353185	44353385	Promoter	LINC00840
chr10	45496095	45496295	Promoter	ZNF22,C10orf25
chr10	49893236	49893436	Promoter	WDFY4
chr10	49893246	49893446	Promoter	WDFY4
chr10	50343950	50344150	Promoter	FAM170B
chr10	50343977	50344177	Promoter	FAM170B
chr10	50396325	50396525	Promoter	C10orf128
chr10	60474152	60474352	Promoter	FAM133CP
chr10	72362192	72362392	Promoter	PRF1
chr10	72362518	72362718	Promoter	PRF1
chr10	72362594	72362794	Promoter	PRF1
chr10	72362709	72362909	Promoter	PRF1
chr10	81370314	81370514	Promoter	SFTPA1
chr10	87336867	87337067	Promoter	GRID1-AS1
chr10	90612873	90613073	Promoter	ANKRD22
chr10	94590696	94590896	Promoter	EXOC6
chr10	94590784	94590984	Promoter	EXOC6
chr10	94590795	94590995	Promoter	EXOC6
chr10	94590997	94591197	Promoter	EXOC6
chr10	95868003	95868203	Promoter	PLCE1-AS2
chr10	97201072	97201272	Promoter	SORBS1
chr10	97201122	97201322	Promoter	SORBS1
chr10	99165991	99166191	Promoter	RRP12
chr10	105277836	105278036	Promoter	NEURL1-AS1
chr10	105978602	105978802	Promoter	MIR609
chr10	106027815	106028015	Promoter	GSTO2,MIR4482
chr10	112628788	112628988	Promoter	PDCD4
chr10	112628834	112629034	Promoter	PDCD4
chr10	112628842	112629042	Promoter	PDCD4
chr10	114134778	114134978	Promoter	ACSL5
chr10	114134815	114135015	Promoter	ACSL5
chr10	114134954	114135154	Promoter	ACSL5
chr10	114134992	114135192	Promoter	ACSL5
chr10	114135953	114136153	Promoter	ACSL5
chr10	114135973	114136173	Promoter	ACSL5
chr10	114708873	114709073	Promoter	TCF7L2
chr10	115998032	115998232	Promoter	VWA2
chr10	119306559	119306759	Promoter	EMX2OS
chr10	119307592	119307792	Promoter	EMX2OS
chr10	119307669	119307869	Promoter	EMX2OS
chr10	122357456	122357656	Promoter	LINC01561
chr10	123922870	123923070	Promoter	TACC2
chr10	123922950	123923150	Promoter	TACC2
chr10	123922966	123923166	Promoter	TACC2
chr10	123922999	123923199	Promoter	TACC2
chr10	123923173	123923373	Promoter	TACC2
chr10	124219464	124219664	Promoter	HTRA1
chr10	126140041	126140241	Promoter	NKX1-2
chr10	126142866	126143066	Promoter	NKX1-2
chr10	126390559	126390759	Promoter	FAM53B-AS1
chr10	126390898	126391098	Promoter	FAM53B-AS1
chr10	127262751	127262951	Promoter	TEX36-AS1
chr10	128080099	128080299	Promoter	ADAM12
chr10	128592424	128592624	Promoter	DOCK1
chr10	133622785	133622985	Promoter	LINC01164
chr10	134143435	134143635	Promoter	LRRC27
chr10	134150442	134150642	Promoter	LRRC27
chr10	134150600	134150800	Promoter	LRRC27
chr10	134776618	134776818	Promoter	LINC01167,LINC01168
chr10	135202696	135202896	Promoter	MTG1
chr10	135202739	135202939	Promoter	MTG1
chr11	414851	415051	Promoter	SIGIRR
chr11	415011	415211	Promoter	SIGIRR
chr11	415357	415557	Promoter	SIGIRR
chr11	1873784	1873984	Promoter	LSP1
chr11	2321670	2321870	Promoter	TSPAN32
chr11	2321700	2321900	Promoter	TSPAN32
chr11	2321703	2321903	Promoter	TSPAN32
chr11	2402291	2402491	Promoter	CD81-AS1
chr11	2919698	2919898	Promoter	SLC22A18
chr11	2919708	2919908	Promoter	SLC22A18
chr11	2919952	2920152	Promoter	SLC22A18
chr11	2920046	2920246	Promoter	SLC22A18
chr11	2920089	2920289	Promoter	SLC22A18
chr11	2920109	2920309	Promoter	SLC22A18
chr11	3647554	3647754	Promoter	TRPC2
chr11	4566753	4566953	Promoter	OR52M1
chr11	5264908	5265108	Promoter	HBBP1
chr11	7488293	7488493	Promoter	LOC100506258
chr11	8986740	8986940	Promoter	TMEM9B
chr11	10316751	10316951	Promoter	SBF2
chr11	10590182	10590382	Promoter	LYVE1
chr11	15664036	15664236	Promoter	LOC102724957
chr11	18258863	18259063	Promoter	SAA4
chr11	18434071	18434271	Promoter	LDHC
chr11	26351623	26351823	Promoter	ANO3
chr11	33915215	33915415	Promoter	LMO2
chr11	35441557	35441757	Promoter	SLC1A2
chr11	35441696	35441896	Promoter	SLC1A2
chr11	35441781	35441981	Promoter	SLC1A2
chr11	36397023	36397223	Promoter	PRR5L
chr11	36397027	36397227	Promoter	PRR5L
chr11	38668440	38668640	Promoter	LOC103312105,LINC01493
chr11	45114742	45114942	Promoter	PRDM11
chr11	45114807	45115007	Promoter	PRDM11
chr11	55736972	55737172	Promoter	OR10AG1
chr11	57006173	57006373	Promoter	APLNR
chr11	57798763	57798963	Promoter	OR6Q1
chr11	59634176	59634376	Promoter	TCN1
chr11	60145978	60146178	Promoter	MS4A7
chr11	60223138	60223338	Promoter	MS4A1
chr11	60223191	60223391	Promoter	MS4A1
chr11	60738871	60739071	Promoter	CD6
chr11	60738895	60739095	Promoter	CD6
chr11	60738905	60739105	Promoter	CD6
chr11	60738919	60739119	Promoter	CD6
chr11	60739072	60739272	Promoter	CD6
chr11	60869660	60869860	Promoter	CD5
chr11	60869810	60870010	Promoter	CD5
chr11	62693356	62693556	Promoter	CHRM1
chr11	63273407	63273607	Promoter	LGALS12
chr11	63273465	63273665	Promoter	LGALS12
chr11	63303299	63303499	Promoter	RARRES3
chr11	63303998	63304198	Promoter	RARRES3
chr11	63973746	63973946	Promoter	FERMT3
chr11	64107417	64107617	Promoter	CCDC88B
chr11	64704181	64704381	Promoter	GPHA2
chr11	64757763	64757963	Promoter	BATF2
chr11	64757839	64758039	Promoter	BATF2
chr11	65407634	65407834	Promoter	SIPA1
chr11	65724370	65724570	Promoter	SART1
chr11	67171376	67171576	Promoter	TBC1D10C,PPP1CA
chr11	67205095	67205295	Promoter	PTPRCAP
chr11	68450167	68450367	Promoter	GAL
chr11	69520171	69520371	Promoter	FGF19
chr11	69520318	69520518	Promoter	FGF19
chr11	69919424	69919624	Promoter	ANO1
chr11	69919890	69920090	Promoter	ANO1
chr11	70705735	70705935	Promoter	SHANK2-AS3
chr11	71532894	71533094	Promoter	ZNF705E
chr11	76383765	76383965	Promoter	LRRC32
chr11	77791853	77792053	Promoter	NDUFC2-KCTD14
chr11	79152721	79152921	Promoter	TENM4
chr11	79152869	79153069	Promoter	TENM4
chr11	84029697	84029897	Promoter	DLG2
chr11	89224902	89225102	Promoter	NOX4
chr11	89224914	89225114	Promoter	NOX4
chr11	89224942	89225142	Promoter	NOX4
chr11	93451522	93451722	Promoter	SCARNA9
chr11	104917668	104917868	Promoter	CARD16
chr11	105479867	105480067	Promoter	GRIA4
chr11	108096394	108096594	Promoter	NPAT
chr11	112352871	112353071	Promoter	LOC101928823
chr11	118085181	118085381	Promoter	AMICA1
chr11	118095444	118095644	Promoter	AMICA1
chr11	118095639	118095839	Promoter	AMICA1
chr11	118098652	118098852	Promoter	AMICA1
chr11	118175072	118175272	Promoter	CD3E
chr11	118213172	118213372	Promoter	CD3D,CD3G
chr11	118213966	118214166	Promoter	CD3D,CD3G
chr11	118214195	118214395	Promoter	CD3D,CD3G
chr11	123910569	123910769	Promoter	OR10G7
chr11	124413129	124413329	Promoter	OR8B12
chr11	124767701	124767901	Promoter	ROBO4
chr11	124767725	124767925	Promoter	ROBO4
chr11	124767740	124767940	Promoter	ROBO4
chr11	124767833	124768033	Promoter	ROBO4
chr11	124767874	124768074	Promoter	ROBO4
chr11	125036285	125036485	Promoter	PKNOX2-AS1
chr11	125657938	125658138	Promoter	PATE3
chr11	126222127	126222327	Promoter	ST3GAL4
chr11	126224885	126225085	Promoter	ST3GAL4-AS1,ST3GAL4
chr11	128389351	128389551	Promoter	MIR6090
chr11	128392963	128393163	Promoter	LOC101929517,ETS1
chr11	128565909	128566109	Promoter	SENCR
chr11	128566287	128566487	Promoter	SENCR
chr11	129242430	129242630	Promoter	BARX2
chr11	130536752	130536952	Promoter	MIR8052
chr11	131779483	131779683	Promoter	NTM
chr11	131779504	131779704	Promoter	NTM
chr11	133403111	133403311	Promoter	OPCML
chr12	719545	719745	Promoter	NINJ2
chr12	719649	719849	Promoter	NINJ2
chr12	6055330	6055530	Promoter	ANO2
chr12	6553045	6553245	Promoter	CD27
chr12	6664772	6664972	Promoter	IFFO1
chr12	6665008	6665208	Promoter	IFFO1
chr12	6665188	6665388	Promoter	IFFO1
chr12	6665230	6665430	Promoter	IFFO1
chr12	6665235	6665435	Promoter	IFFO1
chr12	6665270	6665470	Promoter	IFFO1
chr12	6665324	6665524	Promoter	IFFO1
chr12	6665347	6665547	Promoter	IFFO1
chr12	7905280	7905480	Promoter	CLEC4C
chr12	7916271	7916471	Promoter	NANOGNB
chr12	8218920	8219120	Promoter	C3AR1
chr12	8607514	8607714	Promoter	CLEC6A
chr12	8693442	8693642	Promoter	CLEC4E
chr12	8694928	8695128	Promoter	CLEC4E
chr12	9142172	9142372	Promoter	KLRG1
chr12	9269078	9269278	Promoter	A2M
chr12	9768049	9768249	Promoter	LOC374443
chr12	9822187	9822387	Promoter	CLEC2D
chr12	9885724	9885924	Promoter	CLECL1
chr12	9913957	9914157	Promoter	CD69
chr12	9913986	9914186	Promoter	CD69
chr12	9914285	9914485	Promoter	CD69
chr12	9917253	9917453	Promoter	CD69
chr12	9917274	9917474	Promoter	CD69
chr12	10097053	10097253	Promoter	LOC100506159
chr12	10103450	10103650	Promoter	CLEC12A
chr12	10103712	10103912	Promoter	CLEC12A
chr12	10183980	10184180	Promoter	LOC102724020
chr12	10456785	10456985	Promoter	KLRD1
chr12	10542632	10542832	Promoter	KLRK1
chr12	10544983	10545183	Promoter	KLRK1
chr12	11698434	11698634	Promoter	LINC01252
chr12	18890733	18890933	Promoter	CAPZA3,PLCZ1
chr12	21282913	21283113	Promoter	SLCO1B1
chr12	22090131	22090331	Promoter	ABCC9
chr12	24375305	24375505	Promoter	LOC101928471
chr12	25205029	25205229	Promoter	LRMP
chr12	25205368	25205568	Promoter	LRMP
chr12	25205397	25205597	Promoter	LRMP
chr12	29470740	29470940	Promoter	LOC100506606
chr12	30947874	30948074	Promoter	LINC00941
chr12	30948536	30948736	Promoter	LINC00941
chr12	44226293	44226493	Promoter	TMEM117
chr12	47609906	47610106	Promoter	PCED1B-AS1
chr12	47610120	47610320	Promoter	PCED1B-AS1
chr12	47610157	47610357	Promoter	PCED1B-AS1
chr12	47610176	47610376	Promoter	PCED1B-AS1
chr12	47610271	47610471	Promoter	PCED1B-AS1
chr12	47610318	47610518	Promoter	PCED1B-AS1
chr12	47610634	47610834	Promoter	PCED1B-AS1
chr12	48399040	48399240	Promoter	COL2A1
chr12	49367811	49368011	Promoter	WNT10B,WNT1
chr12	49371651	49371851	Promoter	WNT1
chr12	49688880	49689080	Promoter	PRPH
chr12	51788185	51788385	Promoter	GALNT6
chr12	52484365	52484565	Promoter	OR7E47P
chr12	52688998	52689198	Promoter	KRT81
chr12	52761785	52761985	Promoter	KRT85
chr12	53075316	53075516	Promoter	KRT1
chr12	53075331	53075531	Promoter	KRT1
chr12	53075382	53075582	Promoter	KRT1
chr12	53172380	53172580	Promoter	KRT76
chr12	53193225	53193425	Promoter	KRT3
chr12	53229933	53230133	Promoter	KRT79
chr12	53244430	53244630	Promoter	KRT78
chr12	53496629	53496829	Promoter	SOAT2
chr12	53602818	53603018	Promoter	ITGB7
chr12	54328910	54329110	Promoter	HOXC13
chr12	54329835	54330035	Promoter	HOXC13
chr12	54331110	54331310	Promoter	HOXC13
chr12	54363557	54363757	Promoter	HOTAIR,HOXC11
chr12	54396254	54396454	Promoter	HOXC-AS1
chr12	54396340	54396540	Promoter	HOXC-AS1
chr12	54398418	54398618	Promoter	HOXC8,HOXC-AS1
chr12	54398665	54398865	Promoter	HOXC8,HOXC-AS1
chr12	54398709	54398909	Promoter	HOXC8
chr12	54398791	54398991	Promoter	HOXC8
chr12	54399154	54399354	Promoter	HOXC8
chr12	54399368	54399568	Promoter	HOXC8
chr12	54400394	54400594	Promoter	HOXC8
chr12	54408564	54408764	Promoter	HOXC4,HOXC5,HOXC6
chr12	54409236	54409436	Promoter	HOXC4,HOXC5,HOXC6
chr12	54409385	54409585	Promoter	HOXC4,HOXC5,HOXC6
chr12	54409391	54409591	Promoter	HOXC4,HOXC5,HOXC6
chr12	54409499	54409699	Promoter	HOXC4,HOXC5,HOXC6
chr12	54409557	54409757	Promoter	HOXC4,HOXC5,HOXC6
chr12	54420737	54420937	Promoter	HOXC6
chr12	54424579	54424779	Promoter	HOXC5,MIR615
chr12	54443947	54444147	Promoter	HOXC4
chr12	54447120	54447320	Promoter	FLJ12825,HOXC4
chr12	54447330	54447530	Promoter	FLJ12825,HOXC4
chr12	54447484	54447684	Promoter	FLJ12825,HOXC4
chr12	54447496	54447696	Promoter	FLJ12825,HOXC4
chr12	54447532	54447732	Promoter	FLJ12825,HOXC4
chr12	54447773	54447973	Promoter	FLJ12825,HOXC4
chr12	54447990	54448190	Promoter	FLJ12825,HOXC4
chr12	54758284	54758484	Promoter	GPR84
chr12	54758322	54758522	Promoter	GPR84
chr12	54891391	54891591	Promoter	NCKAP1L
chr12	54891536	54891736	Promoter	NCKAP1L
chr12	54892447	54892647	Promoter	NCKAP1L
chr12	55378069	55378269	Promoter	TESPA1
chr12	55378311	55378511	Promoter	TESPA1
chr12	55378491	55378691	Promoter	TESPA1
chr12	55378521	55378721	Promoter	TESPA1
chr12	55378538	55378738	Promoter	TESPA1
chr12	55378554	55378754	Promoter	TESPA1
chr12	55378784	55378984	Promoter	TESPA1
chr12	55378812	55379012	Promoter	TESPA1
chr12	57873604	57873804	Promoter	ARHGAP9
chr12	57873632	57873832	Promoter	ARHGAP9
chr12	57873780	57873980	Promoter	ARHGAP9
chr12	58135135	58135335	Promoter	AGAP2,TSPAN31
chr12	68553609	68553809	Promoter	IFNG
chr12	68553719	68553919	Promoter	IFNG
chr12	68848894	68849094	Promoter	LOC100507195
chr12	70634249	70634449	Promoter	CNOT2
chr12	71031190	71031390	Promoter	PTPRB
chr12	75872037	75872237	Promoter	GLIPR1
chr12	75874693	75874893	Promoter	GLIPR1
chr12	76479415	76479615	Promoter	NAP1L1
chr12	81109564	81109764	Promoter	MYF5
chr12	81109575	81109775	Promoter	MYF5
chr12	91401588	91401788	Promoter	EPYC
chr12	105503574	105503774	Promoter	LOC414300
chr12	106533767	106533967	Promoter	NUAK1
chr12	109026755	109026955	Promoter	SELPLG
chr12	109026856	109027056	Promoter	SELPLG
chr12	109027583	109027783	Promoter	SELPLG
chr12	109027770	109027970	Promoter	SELPLG
chr12	109027832	109028032	Promoter	SELPLG
chr12	111872187	111872387	Promoter	SH2B3
chr12	111872236	111872436	Promoter	SH2B3
chr12	113340241	113340441	Promoter	OAS1
chr12	113415783	113415983	Promoter	OAS2
chr12	115123775	115123975	Promoter	TBX3
chr12	115124668	115124868	Promoter	TBX3
chr12	115125961	115126161	Promoter	TBX3
chr12	115126808	115127008	Promoter	TBX3
chr12	120688277	120688477	Promoter	PXN
chr12	120689945	120690145	Promoter	PXN
chr12	120691386	120691586	Promoter	PXN
chr12	123218175	123218375	Promoter	HCAR1
chr12	123713453	123713653	Promoter	C12orf65
chr12	130529414	130529614	Promoter	LOC100190940
chr12	131003675	131003875	Promoter	RIMBP2
chr13	23952476	23952676	Promoter	SACS
chr13	24828444	24828644	Promoter	SPATA13-AS1
chr13	24828592	24828792	Promoter	SPATA13-AS1
chr13	24844142	24844342	Promoter	SPATA13
chr13	24844584	24844784	Promoter	SPATA13
chr13	24844746	24844946	Promoter	SPATA13
chr13	24844752	24844952	Promoter	SPATA13
chr13	24844796	24844996	Promoter	SPATA13
chr13	25747157	25747357	Promoter	AMER2
chr13	25747350	25747550	Promoter	AMER2
chr13	30510079	30510279	Promoter	LINC00544
chr13	30947613	30947813	Promoter	LINC00426
chr13	30948003	30948203	Promoter	LINC00426
chr13	30948014	30948214	Promoter	LINC00426
chr13	30948022	30948222	Promoter	LINC00426
chr13	31287342	31287542	Promoter	ALOX5AP
chr13	31287407	31287607	Promoter	ALOX5AP
chr13	31506170	31506370	Promoter	TEX26,TEX26-AS1
chr13	33589185	33589385	Promoter	KL
chr13	33761191	33761391	Promoter	STARD13
chr13	38060276	38060476	Promoter	LINC01048
chr13	40794728	40794928	Promoter	LINC00548
chr13	40795644	40795844	Promoter	LINC00548
chr13	40795791	40795991	Promoter	LINC00548
chr13	41556039	41556239	Promoter	ELF1
chr13	41556398	41556598	Promoter	ELF1
chr13	41556459	41556659	Promoter	ELF1
chr13	46756109	46756309	Promoter	LCP1
chr13	50024603	50024803	Promoter	SETDB2
chr13	51485503	51485703	Promoter	RNASEH2B-AS1
chr13	77605619	77605819	Promoter	FBXL3
chr13	80054131	80054331	Promoter	NDFIP2
chr13	80445378	80445578	Promoter	LINC00382
chr13	88327909	88328109	Promoter	MIR4500HG
chr13	93373045	93373245	Promoter	GPC5-AS1
chr13	98606007	98606207	Promoter	IPO5
chr13	98606096	98606296	Promoter	IPO5
chr13	98859234	98859434	Promoter	MIR3170
chr13	99910487	99910687	Promoter	GPR18
chr13	99959506	99959706	Promoter	GPR183
chr13	99960098	99960298	Promoter	GPR183
chr13	99962735	99962935	Promoter	GPR183
chr13	100149211	100149411	Promoter	TM9SF2
chr13	103935569	103935769	Promoter	MIR548AS
chr13	106117325	106117525	Promoter	DAOA
chr13	107026584	107026784	Promoter	LINC00460
chr13	107028785	107028985	Promoter	LINC00460
chr13	107029023	107029223	Promoter	LINC00460
chr13	110956661	110956861	Promoter	COL4A2
chr13	111837077	111837277	Promoter	ARHGEF7
chr13	115078724	115078924	Promoter	CHAMP1
chr14	21270307	21270507	Promoter	RNASE1
chr14	23288893	23289093	Promoter	SLC7A7
chr14	23289014	23289214	Promoter	SLC7A7
chr14	23589319	23589519	Promoter	CEBPE
chr14	23841654	23841854	Promoter	CMTM5,IL25
chr14	24782356	24782556	Promoter	LTB4R,CIDEB
chr14	24782434	24782634	Promoter	LTB4R,CIDEB
chr14	24838069	24838269	Promoter	NFATC4
chr14	24838084	24838284	Promoter	NFATC4
chr14	24894595	24894795	Promoter	KHNYN
chr14	25103446	25103646	Promoter	GZMB
chr14	32675336	32675536	Promoter	RNU6-2
chr14	39702042	39702242	Promoter	MIA2
chr14	50510748	50510948	Promoter	LOC100506499
chr14	52732199	52732399	Promoter	PTGDR
chr14	56231504	56231704	Promoter	RPL13AP3
chr14	60632432	60632632	Promoter	DHRS7
chr14	62462260	62462460	Promoter	SYT16
chr14	75988551	75988751	Promoter	BATF
chr14	75989103	75989303	Promoter	BATF
chr14	81408841	81409041	Promoter	CEP128
chr14	88490233	88490433	Promoter	LINC01146
chr14	88493164	88493364	Promoter	LOC101928791
chr14	92333665	92333865	Promoter	TC2N
chr14	93532463	93532663	Promoter	ITPK1-AS1
chr14	93532532	93532732	Promoter	ITPK1-AS1
chr14	94254192	94254392	Promoter	PRIMA1
chr14	94254251	94254451	Promoter	PRIMA1
chr14	94423299	94423499	Promoter	ASB2
chr14	94442860	94443060	Promoter	ASB2
chr14	94442955	94443155	Promoter	ASB2
chr14	94834663	94834863	Promoter	SERPINA2
chr14	94943909	94944109	Promoter	SERPINA9
chr14	94946603	94946803	Promoter	SERPINA9
chr14	95026788	95026988	Promoter	SERPINA4
chr14	95047491	95047691	Promoter	SERPINA5
chr14	95047532	95047732	Promoter	SERPINA5
chr14	95047555	95047755	Promoter	SERPINA5
chr14	95794368	95794568	Promoter	LOC101929080
chr14	97924915	97925115	Promoter	LOC101929241
chr14	99177887	99178087	Promoter	C14orf177
chr14	100531231	100531431	Promoter	EVL
chr14	100531491	100531691	Promoter	EVL
chr14	100531497	100531697	Promoter	EVL
chr14	100531700	100531900	Promoter	EVL
[truncated: 577 more rows]

## Sheet: all plaque
chr1:2187662-2187862	Enhancer	GNB1; >>	Keratinocyte; >>
chr1:84831493-84831693	Enhancer	RP11; >>	HUVEC; >>
chr1:204561517-204561717	Enhancer	RP11; >>	Keratinocyte; >>
chr1:209943031-209943231	Enhancer	RP11; >>	Keratinocyte; >>
chr1:11537877-11538077	Promoter	PTCHD2
chr1:11710510-11710710	Promoter	FBXO44
chr1:38412611-38412811	Promoter	INPP5B
chr1:38412644-38412844	Promoter	INPP5B
chr1:109395157-109395357	Promoter	SPATA42
chr1:151693122-151693322	Promoter	CELF3,RIIAD1

## Sheet:  hypo  promoter genes nodule
chr1	1109144	1109344	Promoter	TTLL10
chr1	1109386	1109586	Promoter	TTLL10
chr1	1144458	1144658	Promoter	TNFRSF18
chr1	6054767	6054967	Promoter	NPHP4
chr1	6526369	6526569	Promoter	TNFRSF25
chr1	8003322	8003522	Promoter	TNFRSF9
chr1	8487770	8487970	Promoter	RERE
chr1	9290985	9291185	Promoter	H6PD
chr1	9711298	9711498	Promoter	PIK3CD
chr1	9714180	9714380	Promoter	PIK3CD-AS1
chr1	9714297	9714497	Promoter	PIK3CD-AS1
chr1	9714743	9714943	Promoter	PIK3CD-AS1
chr1	11710510	11710710	Promoter	FBXO44
chr1	15734185	15734385	Promoter	EFHD2
chr1	16871198	16871398	Promoter	MIR3675
chr1	17189522	17189722	Promoter	MIR3675
chr1	17528138	17528338	Promoter	PADI1
chr1	18391989	18392189	Promoter	LOC101927876
chr1	21619971	21620171	Promoter	LOC100506801,ECE1
chr1	24239720	24239920	Promoter	CNR2
chr1	24239900	24240100	Promoter	CNR2
chr1	25291285	25291485	Promoter	RUNX3
chr1	25291446	25291646	Promoter	RUNX3
chr1	25291805	25292005	Promoter	RUNX3
chr1	26547134	26547334	Promoter	LOC101928303
chr1	26644662	26644862	Promoter	UBXN11,CD52
chr1	26645213	26645413	Promoter	UBXN11
chr1	26645387	26645587	Promoter	UBXN11
chr1	26699873	26700073	Promoter	ZNF683
chr1	31230637	31230837	Promoter	LAPTM5
chr1	31230746	31230946	Promoter	LAPTM5
chr1	32173319	32173519	Promoter	COL16A1
chr1	32715328	32715528	Promoter	LCK
chr1	32715349	32715549	Promoter	LCK
chr1	32716673	32716873	Promoter	LCK
chr1	32716707	32716907	Promoter	LCK
chr1	32716717	32716917	Promoter	LCK
chr1	32716727	32716927	Promoter	LCK
chr1	36270110	36270310	Promoter	AGO4
chr1	37944157	37944357	Promoter	LINC01137,MIR6732
chr1	38412419	38412619	Promoter	INPP5B
chr1	38412584	38412784	Promoter	INPP5B
chr1	38412588	38412788	Promoter	INPP5B
chr1	38412611	38412811	Promoter	INPP5B
chr1	40860492	40860692	Promoter	SMAP2
chr1	43766547	43766747	Promoter	TIE1
chr1	45989280	45989480	Promoter	PRDX1
chr1	52195570	52195770	Promoter	OSBPL9
chr1	53794050	53794250	Promoter	LRP8
chr1	55683237	55683437	Promoter	USP24
chr1	55683255	55683455	Promoter	USP24
chr1	55683273	55683473	Promoter	USP24
chr1	57045646	57045846	Promoter	PPAP2B
chr1	59758363	59758563	Promoter	FGGY
chr1	66796639	66796839	Promoter	PDE4B
chr1	66815877	66816077	Promoter	PDE4B
chr1	67631912	67632112	Promoter	IL23R
chr1	70225566	70225766	Promoter	LRRC7
chr1	86044076	86044276	Promoter	CYR61,DDAH1
chr1	86932682	86932882	Promoter	CLCA1
chr1	89664682	89664882	Promoter	GBP4
chr1	92414195	92414395	Promoter	BRDT
chr1	92414622	92414822	Promoter	BRDT
chr1	94080980	94081180	Promoter	BCAR3
chr1	108440222	108440422	Promoter	MIR7852
chr1	109395157	109395357	Promoter	SPATA42
chr1	110035570	110035770	Promoter	CYB561D1
chr1	110616763	110616963	Promoter	ALX3
chr1	111033781	111033981	Promoter	LOC440602
chr1	111174023	111174223	Promoter	KCNA2
chr1	111178908	111179108	Promoter	KCNA2
chr1	111415681	111415881	Promoter	CD53
chr1	112016486	112016686	Promoter	C1orf162
chr1	112049999	112050199	Promoter	ADORA3
chr1	112158997	112159197	Promoter	RAP1A
chr1	113164572	113164772	Promoter	ST7L
chr1	114413942	114414142	Promoter	PTPN22
chr1	114414212	114414412	Promoter	PTPN22
chr1	114414240	114414440	Promoter	PTPN22
chr1	114414308	114414508	Promoter	PTPN22
chr1	114414432	114414632	Promoter	PTPN22
chr1	116312629	116312829	Promoter	CASQ2
chr1	116923371	116923571	Promoter	ATP1A1
chr1	117544106	117544306	Promoter	CD101
chr1	117544316	117544516	Promoter	CD101
chr1	120049054	120049254	Promoter	HSD3B1
chr1	121258390	121258590	Promoter	EMBP1
chr1	145715536	145715736	Promoter	CD160
chr1	147399474	147399674	Promoter	GPR89B
chr1	151030868	151031068	Promoter	MLLT11
chr1	151129198	151129398	Promoter	TNFAIP8L2-SCNM1
chr1	151693122	151693322	Promoter	CELF3,RIIAD1
chr1	152088989	152089189	Promoter	TCHH
chr1	152298941	152299141	Promoter	FLG
chr1	152333323	152333523	Promoter	FLG2
chr1	152482480	152482680	Promoter	LCE5A,CRCT1
chr1	152636162	152636362	Promoter	LCE2D
chr1	152669885	152670085	Promoter	LCE2A
chr1	152680402	152680602	Promoter	LCE4A
chr1	152681787	152681987	Promoter	LCE4A
chr1	152814731	152814931	Promoter	LCE6A
chr1	152941045	152941245	Promoter	SPRR4
chr1	152955443	152955643	Promoter	SPRR1A
chr1	152973857	152974057	Promoter	SPRR3
chr1	153085549	153085749	Promoter	SPRR2F
chr1	153114590	153114790	Promoter	SPRR2C
chr1	153124155	153124355	Promoter	SPRR2G
chr1	153145494	153145694	Promoter	LOC101928009
chr1	153146264	153146464	Promoter	LOC101928009
chr1	154164851	154165051	Promoter	TPM3
chr1	154582056	154582256	Promoter	ADAR
chr1	156786623	156786823	Promoter	SH2D2A
chr1	157670120	157670320	Promoter	FCRL3
chr1	157670228	157670428	Promoter	FCRL3
chr1	157670381	157670581	Promoter	FCRL3
chr1	157670610	157670810	Promoter	FCRL3
chr1	157789792	157789992	Promoter	FCRL1
chr1	157789833	157790033	Promoter	FCRL1
chr1	158259168	158259368	Promoter	CD1C
chr1	158549320	158549520	Promoter	OR10X1
chr1	158656384	158656584	Promoter	SPTA1
chr1	158656618	158656818	Promoter	SPTA1
chr1	158799924	158800124	Promoter	MNDA
chr1	158900449	158900649	Promoter	PYHIN1
chr1	158900544	158900744	Promoter	PYHIN1
chr1	158978712	158978912	Promoter	IFI16
chr1	159046673	159046873	Promoter	AIM2
chr1	159046934	159047134	Promoter	AIM2
chr1	159047063	159047263	Promoter	AIM2
chr1	159047077	159047277	Promoter	AIM2
chr1	159770153	159770353	Promoter	FCRL6
chr1	159770268	159770468	Promoter	FCRL6
chr1	159796207	159796407	Promoter	SLAMF8
chr1	159928580	159928780	Promoter	LINC01133,SLAMF9
chr1	160492989	160493189	Promoter	SLAMF6
chr1	160616504	160616704	Promoter	SLAMF1
chr1	160617227	160617427	Promoter	SLAMF1
chr1	160617256	160617456	Promoter	SLAMF1
chr1	160681304	160681504	Promoter	CD48
chr1	160681660	160681860	Promoter	CD48
chr1	160681797	160681997	Promoter	CD48
chr1	160681908	160682108	Promoter	CD48
chr1	160682555	160682755	Promoter	CD48
chr1	160683007	160683207	Promoter	CD48
chr1	161039595	161039795	Promoter	ARHGAP30
chr1	161164953	161165153	Promoter	NDUFS2
chr1	161996641	161996841	Promoter	OLFML2B
chr1	162328024	162328224	Promoter	NOS1AP
chr1	162331701	162331901	Promoter	NOS1AP
chr1	162382900	162383100	Promoter	SH2D1B
chr1	165326169	165326369	Promoter	LMX1A
chr1	165326227	165326427	Promoter	LMX1A
chr1	167487296	167487496	Promoter	CD247
chr1	167487771	167487971	Promoter	CD247
chr1	167598893	167599093	Promoter	RCSD1
chr1	167599024	167599224	Promoter	RCSD1
chr1	169677821	169678021	Promoter	SELL
chr1	172114319	172114519	Promoter	MIR199A2,DNM3OS
chr1	172627965	172628165	Promoter	FASLG
chr1	173174550	173174750	Promoter	TNFSF4
chr1	173174815	173175015	Promoter	TNFSF4
chr1	173174820	173175020	Promoter	TNFSF4
chr1	175036587	175036787	Promoter	TNN
chr1	181204297	181204497	Promoter	GM140
chr1	183274561	183274761	Promoter	NMNAT2
chr1	185307995	185308195	Promoter	GS1-279B7.1
chr1	185308535	185308735	Promoter	GS1-279B7.1
chr1	192544802	192545002	Promoter	RGS1
chr1	196620863	196621063	Promoter	CFH
chr1	196945430	196945630	Promoter	CFHR5
chr1	197747784	197747984	Promoter	DENND1B
chr1	198608063	198608263	Promoter	PTPRC
chr1	198608261	198608461	Promoter	PTPRC
chr1	198608283	198608483	Promoter	PTPRC
chr1	200994878	200995078	Promoter	KIF21B
chr1	201684867	201685067	Promoter	MIR5191
chr1	201688319	201688519	Promoter	MIR5191
chr1	202128582	202128782	Promoter	PTPN7
chr1	202129092	202129292	Promoter	PTPN7
chr1	202129104	202129304	Promoter	PTPN7
chr1	202129155	202129355	Promoter	PTPN7
chr1	202130820	202131020	Promoter	PTPN7
chr1	202131084	202131284	Promoter	PTPN7
chr1	203147267	203147467	Promoter	MYBPH
chr1	203733814	203734014	Promoter	LAX1
chr1	203734156	203734356	Promoter	LAX1
chr1	203734162	203734362	Promoter	LAX1
chr1	203734296	203734496	Promoter	LAX1
chr1	203734378	203734578	Promoter	LAX1
chr1	203734405	203734605	Promoter	LAX1
chr1	204338415	204338615	Promoter	LINC00628
chr1	204482606	204482806	Promoter	MDM4
chr1	206945824	206946024	Promoter	IL10
chr1	207002561	207002761	Promoter	IL19
chr1	207095053	207095253	Promoter	FAIM3
chr1	207095157	207095357	Promoter	FAIM3
chr1	207095215	207095415	Promoter	FAIM3
chr1	207095232	207095432	Promoter	FAIM3
chr1	207095305	207095505	Promoter	FAIM3
chr1	207095478	207095678	Promoter	FAIM3
chr1	207095568	207095768	Promoter	FAIM3
chr1	207096258	207096458	Promoter	FAIM3
chr1	207143433	207143633	Promoter	FCAMR
chr1	207143961	207144161	Promoter	FCAMR
chr1	207144548	207144748	Promoter	FCAMR
chr1	208084842	208085042	Promoter	CD34
chr1	209877240	209877440	Promoter	HSD11B1
chr1	209877282	209877482	Promoter	HSD11B1
chr1	209877338	209877538	Promoter	HSD11B1
chr1	209928795	209928995	Promoter	TRAF3IP3
chr1	209929337	209929537	Promoter	TRAF3IP3
chr1	209929396	209929596	Promoter	TRAF3IP3
chr1	209929522	209929722	Promoter	TRAF3IP3
chr1	211666029	211666229	Promoter	RD3
chr1	214157836	214158036	Promoter	PROX1
chr1	218216579	218216779	Promoter	LOC101929631
chr1	220959986	220960186	Promoter	2001-03-01
chr1	226132741	226132941	Promoter	LEFTY2
chr1	226862807	226863007	Promoter	ITPKB-IT1
chr1	226862815	226863015	Promoter	ITPKB-IT1
chr1	226862859	226863059	Promoter	ITPKB-IT1
chr1	226863038	226863238	Promoter	ITPKB-IT1
chr1	226866357	226866557	Promoter	ITPKB-IT1
chr1	231295686	231295886	Promoter	TRIM67
chr1	235099306	235099506	Promoter	LOC101927851
chr1	236019340	236019540	Promoter	MIR1537
chr1	238054252	238054452	Promoter	ZP4
chr1	238054469	238054669	Promoter	ZP4
chr1	239882740	239882940	Promoter	CHRM3-AS2
chr1	239882777	239882977	Promoter	CHRM3-AS2
chr1	239883364	239883564	Promoter	CHRM3-AS2
chr1	240776679	240776879	Promoter	GREM2
chr1	247579212	247579412	Promoter	NLRP3
chr1	247579219	247579419	Promoter	NLRP3
chr1	247579339	247579539	Promoter	NLRP3
chr1	247579508	247579708	Promoter	NLRP3
chr1	247711495	247711695	Promoter	GCSAML
chr1	247712040	247712240	Promoter	GCSAML
chr1	247712137	247712337	Promoter	GCSAML
chr1	247712277	247712477	Promoter	GCSAML
chr1	247712283	247712483	Promoter	GCSAML
chr1	248651673	248651873	Promoter	OR2T5
chr1	248722808	248723008	Promoter	OR2T29
chr1	248815470	248815670	Promoter	OR2T27
chr1	249128779	249128979	Promoter	ZNF672
chr2	6773990	6774190	Promoter	LINC01246
chr2	8469835	8470035	Promoter	LINC00299
chr2	8469942	8470142	Promoter	LINC00299
chr2	10221085	10221285	Promoter	CYS1
chr2	10258292	10258492	Promoter	RRM2
chr2	10438386	10438586	Promoter	HPCAL1
chr2	10470023	10470223	Promoter	HPCAL1
chr2	10470042	10470242	Promoter	HPCAL1
chr2	10470182	10470382	Promoter	HPCAL1
chr2	10587527	10587727	Promoter	LOC101929715,SNORA80B,ODC1
chr2	10856872	10857072	Promoter	ATP6V1C2
chr2	11606845	11607045	Promoter	E2F6
chr2	11606942	11607142	Promoter	E2F6
chr2	20795812	20796012	Promoter	HS1BP3-IT1
chr2	25393877	25394077	Promoter	POMC
chr2	27298243	27298443	Promoter	EMILIN1,OST4
chr2	27719444	27719644	Promoter	GCKR,FNDC4
chr2	31444582	31444782	Promoter	CAPN14
chr2	32489965	32490165	Promoter	NLRC4
chr2	38056795	38056995	Promoter	LINC00211
chr2	38107701	38107901	Promoter	LINC00211
chr2	38264863	38265063	Promoter	RMDN2-AS1
chr2	44585766	44585966	Promoter	CAMKMT
chr2	45238342	45238542	Promoter	SIX2
chr2	47041402	47041602	Promoter	LINC01118
chr2	47054733	47054933	Promoter	LINC01119
chr2	47054863	47055063	Promoter	LINC01119
chr2	48540793	48540993	Promoter	FOXN2
chr2	48795894	48796094	Promoter	STON1-GTF2A1L
chr2	54751885	54752085	Promoter	RPL23AP32
chr2	55455248	55455448	Promoter	RPS27A
chr2	55509679	55509879	Promoter	PRORSD1P
chr2	55509843	55510043	Promoter	PRORSD1P
chr2	56212645	56212845	Promoter	MIR217
chr2	59444655	59444855	Promoter	LOC101927285
chr2	60618455	60618655	Promoter	MIR4432
chr2	60618504	60618704	Promoter	MIR4432
chr2	61646407	61646607	Promoter	SNORA70B
chr2	66589802	66590002	Promoter	MIR4778
chr2	66665328	66665528	Promoter	MEIS1-AS3
chr2	66796592	66796792	Promoter	LOC100507073
chr2	66801299	66801499	Promoter	LOC100507073
chr2	68592275	68592475	Promoter	PLEK
chr2	68592294	68592494	Promoter	PLEK
chr2	68961855	68962055	Promoter	ARHGAP25
chr2	68961887	68962087	Promoter	ARHGAP25
chr2	68961912	68962112	Promoter	ARHGAP25
chr2	68997541	68997741	Promoter	ARHGAP25
chr2	68998494	68998694	Promoter	ARHGAP25
chr2	69001524	69001724	Promoter	ARHGAP25
chr2	69001565	69001765	Promoter	ARHGAP25
chr2	69001674	69001874	Promoter	ARHGAP25
chr2	69001715	69001915	Promoter	ARHGAP25
chr2	69001754	69001954	Promoter	ARHGAP25
chr2	69002144	69002344	Promoter	ARHGAP25
chr2	69002278	69002478	Promoter	ARHGAP25
chr2	74758136	74758336	Promoter	DQX1,AUP1
chr2	77212435	77212635	Promoter	LOC101927907
chr2	85811136	85811336	Promoter	VAMP5
chr2	86424149	86424349	Promoter	MIR4779,MRPL35,IMMT
chr2	86855500	86855700	Promoter	RNF103
chr2	97408699	97408899	Promoter	LMAN2L
chr2	98329920	98330120	Promoter	ZAP70
chr2	99351450	99351650	Promoter	MGAT4A
chr2	100758914	100759114	Promoter	AFF3
chr2	100759034	100759234	Promoter	AFF3
chr2	100759059	100759259	Promoter	AFF3
chr2	102091575	102091775	Promoter	RFX8
chr2	102091655	102091855	Promoter	RFX8
chr2	102754919	102755119	Promoter	IL1R1
chr2	103035127	103035327	Promoter	IL18RAP
chr2	106757474	106757674	Promoter	UXS1
chr2	110367267	110367467	Promoter	SOWAHC
chr2	113398452	113398652	Promoter	SLC20A1
chr2	113404561	113404761	Promoter	FLJ42351
chr2	113404578	113404778	Promoter	FLJ42351
chr2	113404828	113405028	Promoter	FLJ42351
chr2	113405025	113405225	Promoter	FLJ42351
chr2	113885016	113885216	Promoter	IL1RN
chr2	119608021	119608221	Promoter	EN1
chr2	119609492	119609692	Promoter	EN1
chr2	119609542	119609742	Promoter	EN1
chr2	119609591	119609791	Promoter	EN1
chr2	119610426	119610626	Promoter	EN1
chr2	119698168	119698368	Promoter	MARCO
chr2	119699582	119699782	Promoter	MARCO
chr2	120186122	120186322	Promoter	TMEM37
chr2	130956019	130956219	Promoter	TUBA3E
chr2	131673863	131674063	Promoter	ARHGEF4
chr2	131674049	131674249	Promoter	ARHGEF4
chr2	131674075	131674275	Promoter	ARHGEF4
chr2	131674101	131674301	Promoter	ARHGEF4
chr2	134199631	134199831	Promoter	MIR7853
chr2	136577554	136577754	Promoter	LOC100507600
chr2	136577632	136577832	Promoter	LOC100507600
chr2	136577647	136577847	Promoter	LOC100507600
chr2	138717842	138718042	Promoter	HNMT
chr2	143886467	143886667	Promoter	ARHGAP15
chr2	143886485	143886685	Promoter	ARHGAP15
chr2	143886840	143887040	Promoter	ARHGAP15
chr2	151480511	151480711	Promoter	LOC101929282
chr2	151484339	151484539	Promoter	LOC101929282
chr2	157291162	157291362	Promoter	GPD2
chr2	158300375	158300575	Promoter	CYTIP
chr2	158300385	158300585	Promoter	CYTIP
chr2	158300711	158300911	Promoter	CYTIP
chr2	158300860	158301060	Promoter	CYTIP
chr2	163100892	163101092	Promoter	FAP
chr2	167005740	167005940	Promoter	SCN1A
chr2	167005951	167006151	Promoter	SCN1A
chr2	167343674	167343874	Promoter	SCN7A
chr2	168674669	168674869	Promoter	B3GALT1
chr2	170364058	170364258	Promoter	KLHL41
chr2	172945174	172945374	Promoter	DLX1
chr2	172945228	172945428	Promoter	DLX1
chr2	175354957	175355157	Promoter	GPR155
chr2	175499013	175499213	Promoter	WIPF1
chr2	175499265	175499465	Promoter	WIPF1
chr2	175499277	175499477	Promoter	WIPF1
chr2	175629535	175629735	Promoter	CHRNA1
chr2	179914527	179914727	Promoter	CCDC141
chr2	179914764	179914964	Promoter	CCDC141
chr2	182170397	182170597	Promoter	MIR4437
chr2	182171370	182171570	Promoter	MIR4437
chr2	182174240	182174440	Promoter	MIR4437
chr2	182321182	182321382	Promoter	ITGA4
chr2	182321254	182321454	Promoter	ITGA4
chr2	182321273	182321473	Promoter	ITGA4
chr2	183387785	183387985	Promoter	PDE1A
chr2	188419468	188419668	Promoter	TFPI
chr2	189843037	189843237	Promoter	MIR1245B,MIR1245A
chr2	190522501	190522701	Promoter	ASNSD1
chr2	190522664	190522864	Promoter	ASNSD1
chr2	191883383	191883583	Promoter	STAT1
chr2	192017640	192017840	Promoter	STAT4
chr2	197124688	197124888	Promoter	LOC101927482
chr2	197124725	197124925	Promoter	LOC101927482
chr2	198169719	198169919	Promoter	ANKRD44-IT1
chr2	201993695	201993895	Promoter	CFLAR
chr2	201995629	201995829	Promoter	CFLAR
chr2	202118026	202118226	Promoter	CASP8
chr2	202124988	202125188	Promoter	CASP8
chr2	202124992	202125192	Promoter	CASP8
chr2	202125075	202125275	Promoter	CASP8
chr2	202125112	202125312	Promoter	CASP8
chr2	204571046	204571246	Promoter	CD28
chr2	204571115	204571315	Promoter	CD28
chr2	204801313	204801513	Promoter	ICOS
chr2	207082544	207082744	Promoter	GPR1
chr2	208000116	208000316	Promoter	KLF7
chr2	208390116	208390316	Promoter	CREB1
chr2	210444128	210444328	Promoter	MAP2
chr2	210444170	210444370	Promoter	MAP2
chr2	210444375	210444575	Promoter	MAP2
chr2	219723167	219723367	Promoter	WNT6
chr2	223912442	223912642	Promoter	KCNE4
chr2	225266556	225266756	Promoter	FAM124B
chr2	225266625	225266825	Promoter	FAM124B
chr2	225266633	225266833	Promoter	FAM124B
chr2	225266683	225266883	Promoter	FAM124B
chr2	225266743	225266943	Promoter	FAM124B
chr2	225266776	225266976	Promoter	FAM124B
chr2	225266860	225267060	Promoter	FAM124B
chr2	225811510	225811710	Promoter	DOCK10
chr2	225811540	225811740	Promoter	DOCK10
chr2	225811569	225811769	Promoter	DOCK10
chr2	225811638	225811838	Promoter	DOCK10
chr2	225811838	225812038	Promoter	DOCK10
chr2	225812374	225812574	Promoter	DOCK10
chr2	231090431	231090631	Promoter	SP140,SP110
chr2	231090540	231090740	Promoter	SP140,SP110
chr2	231090645	231090845	Promoter	SP140,SP110
chr2	231090955	231091155	Promoter	SP110
chr2	231092021	231092221	Promoter	SP110
chr2	231191562	231191762	Promoter	SP140L
chr2	231191627	231191827	Promoter	SP140L
chr2	232258263	232258463	Promoter	B3GNT7
chr2	232756980	232757180	Promoter	MIR1471
chr2	233924689	233924889	Promoter	INPP5D
chr2	233924701	233924901	Promoter	INPP5D
chr2	233924752	233924952	Promoter	INPP5D
chr2	233924901	233925101	Promoter	INPP5D
chr2	233924930	233925130	Promoter	INPP5D
chr2	237418797	237418997	Promoter	IQCA1
chr2	238392010	238392210	Promoter	MLPH
chr2	241560907	241561107	Promoter	GPR35
chr2	241561137	241561337	Promoter	GPR35
chr2	242557279	242557479	Promoter	THAP4
chr2	242805862	242806062	Promoter	PDCD1
chr2	242908118	242908318	Promoter	LOC102723927
chr2	242908234	242908434	Promoter	LOC102723927
chr2	242908294	242908494	Promoter	LOC102723927
chr3	1132928	1133128	Promoter	CNTN6
chr3	11766369	11766569	Promoter	VGLL4
chr3	15541801	15542001	Promoter	MIR4270,COLQ
chr3	25499005	25499205	Promoter	RARB
chr3	30644546	30644746	Promoter	TGFBR2
chr3	31741090	31741290	Promoter	OSBPL10-AS1
chr3	32432542	32432742	Promoter	CMTM7
chr3	32992963	32993163	Promoter	CCR4
chr3	32993065	32993265	Promoter	CCR4
chr3	33763405	33763605	Promoter	CLASP2
chr3	38080250	38080450	Promoter	DLEC1
chr3	44155037	44155237	Promoter	MIR138-1
chr3	45957166	45957366	Promoter	LZTFL1
chr3	46249695	46249895	Promoter	CCR1
chr3	46249885	46250085	Promoter	CCR1
chr3	46249924	46250124	Promoter	CCR1
chr3	46410122	46410322	Promoter	CCR5
chr3	46410322	46410522	Promoter	CCR5
chr3	46447984	46448184	Promoter	CCRL2,LOC102724297
chr3	46448034	46448234	Promoter	CCRL2,LOC102724297
chr3	46448602	46448802	Promoter	CCRL2,LOC102724297
chr3	46448653	46448853	Promoter	CCRL2,LOC102724297
chr3	46448768	46448968	Promoter	CCRL2,LOC102724297
chr3	46448820	46449020	Promoter	CCRL2,LOC102724297
chr3	46448863	46449063	Promoter	CCRL2,LOC102724297
chr3	46449095	46449295	Promoter	CCRL2,LOC102724297
chr3	48598580	48598780	Promoter	PFKFB4
chr3	50376055	50376255	Promoter	RASSF1
chr3	52316134	52316334	Promoter	WDR82
chr3	52347840	52348040	Promoter	DNAH1
chr3	52828293	52828493	Promoter	ITIH3
chr3	52873058	52873258	Promoter	MUSTN1
chr3	55518031	55518231	Promoter	WNT5A
chr3	55518698	55518898	Promoter	WNT5A
chr3	55694619	55694819	Promoter	ERC2-IT1
chr3	56836461	56836661	Promoter	ARHGEF3
chr3	56951817	56952017	Promoter	ARHGEF3
chr3	58218315	58218515	Promoter	ABHD6
chr3	64676909	64677109	Promoter	ADAMTS9
chr3	67705947	67706147	Promoter	SUCLG2
chr3	98449321	98449521	Promoter	ST3GAL6
chr3	100328086	100328286	Promoter	GPR128
chr3	101441333	101441533	Promoter	CEP97
chr3	107844314	107844514	Promoter	LINC01215
chr3	107844661	107844861	Promoter	LINC01215
chr3	108541405	108541605	Promoter	TRAT1
chr3	111315287	111315487	Promoter	ZBED2
chr3	112218157	112218357	Promoter	BTLA
chr3	112218661	112218861	Promoter	BTLA
chr3	112323519	112323719	Promoter	LINC01279
chr3	112324201	112324401	Promoter	LINC01279
chr3	114010159	114010359	Promoter	TIGIT
chr3	114465656	114465856	Promoter	MIR4796
chr3	116428510	116428710	Promoter	TUSC7
chr3	118865827	118866027	Promoter	IGSF11
chr3	118866032	118866232	Promoter	IGSF11
chr3	119281192	119281392	Promoter	CD80
chr3	119963830	119964030	Promoter	GPR156
chr3	120118330	120118530	Promoter	MIR198
chr3	121379645	121379845	Promoter	HCLS1
chr3	121379677	121379877	Promoter	HCLS1
chr3	121379691	121379891	Promoter	HCLS1
chr3	121796527	121796727	Promoter	CD86
chr3	122296309	122296509	Promoter	PARP15
chr3	123407470	123407670	Promoter	MYLK-AS2
chr3	124933790	124933990	Promoter	SLC12A8
chr3	128995379	128995579	Promoter	HMCES
chr3	129244195	129244395	Promoter	RHO
chr3	130060973	130061173	Promoter	COL6A5
chr3	136537069	136537269	Promoter	SLC35G2
chr3	136537167	136537367	Promoter	SLC35G2
chr3	136537507	136537707	Promoter	SLC35G2
chr3	136537609	136537809	Promoter	SLC35G2
chr3	141204907	141205107	Promoter	RASA2
chr3	143686517	143686717	Promoter	C3orf58
chr3	150920864	150921064	Promoter	GPR171
chr3	150920951	150921151	Promoter	GPR171
chr3	150996171	150996371	Promoter	P2RY14
chr3	150996197	150996397	Promoter	P2RY14
chr3	151589411	151589611	Promoter	SUCNR1
chr3	160121721	160121921	Promoter	IFT80,MIR15B,MIR16-2
chr3	171531998	171532198	Promoter	PLD1
chr3	171753911	171754111	Promoter	FNDC3B
chr3	179326721	179326921	Promoter	MRPL47
chr3	183273145	183273345	Promoter	KLHL6
chr3	183273342	183273542	Promoter	KLHL6
chr3	183273394	183273594	Promoter	KLHL6
chr3	183273457	183273657	Promoter	KLHL6
chr3	183273641	183273841	Promoter	KLHL6
chr3	183273707	183273907	Promoter	KLHL6
chr3	183273794	183273994	Promoter	KLHL6
chr3	187086430	187086630	Promoter	RTP4
chr3	187389315	187389515	Promoter	SST
chr3	189348574	189348774	Promoter	TP63
chr3	190105886	190106086	Promoter	CLDN16
chr3	194120849	194121049	Promoter	GP5
chr3	194868327	194868527	Promoter	XXYLT1-AS2
chr3	194868338	194868538	Promoter	XXYLT1-AS2
chr3	194868407	194868607	Promoter	XXYLT1-AS2
chr3	194868650	194868850	Promoter	XXYLT1-AS2
chr3	194868690	194868890	Promoter	XXYLT1-AS2
chr3	195542453	195542653	Promoter	MUC4
chr3	196068118	196068318	Promoter	TM4SF19,TM4SF19-TCTEX1D2
chr4	121468	121668	Promoter	ZNF718
chr4	2813692	2813892	Promoter	SH3BP2
chr4	2813964	2814164	Promoter	SH3BP2
chr4	2814022	2814222	Promoter	SH3BP2
chr4	10686313	10686513	Promoter	CLNK
chr4	10686357	10686557	Promoter	CLNK
chr4	10686510	10686710	Promoter	CLNK
chr4	17815803	17816003	Promoter	DCAF16
chr4	24795730	24795930	Promoter	SOD3
chr4	36257179	36257379	Promoter	LOC439933
chr4	36258030	36258230	Promoter	LOC439933
chr4	36258105	36258305	Promoter	LOC439933
chr4	38807159	38807359	Promoter	TLR1
chr4	38807237	38807437	Promoter	TLR1
chr4	38807282	38807482	Promoter	TLR1
chr4	39034172	39034372	Promoter	TMEM156
chr4	39035383	39035583	Promoter	TMEM156
chr4	40198292	40198492	Promoter	RHOH
chr4	40198370	40198570	Promoter	RHOH
chr4	40198381	40198581	Promoter	RHOH
chr4	40198386	40198586	Promoter	RHOH
chr4	40198495	40198695	Promoter	RHOH
chr4	40198559	40198759	Promoter	RHOH
chr4	40198676	40198876	Promoter	RHOH
chr4	57972484	57972684	Promoter	IGFBP7-AS1
chr4	68424395	68424595	Promoter	STAP1
chr4	77226317	77226517	Promoter	STBD1
chr4	83826591	83826791	Promoter	THAP9-AS1
chr4	84034054	84034254	Promoter	PLAC8
chr4	86850008	86850208	Promoter	ARHGAP24
chr4	86850021	86850221	Promoter	ARHGAP24
chr4	86850234	86850434	Promoter	ARHGAP24
chr4	86850278	86850478	Promoter	ARHGAP24
chr4	86851311	86851511	Promoter	ARHGAP24
chr4	86851325	86851525	Promoter	ARHGAP24
chr4	90815873	90816073	Promoter	MMRN1
chr4	96012217	96012417	Promoter	BMPR1B
chr4	99853784	99853984	Promoter	EIF4E
chr4	100213545	100213745	Promoter	ADH1A
chr4	103246019	103246219	Promoter	SLC39A8
chr4	106471366	106471566	Promoter	ARHGEF38
chr4	141177519	141177719	Promoter	SCOC
chr4	142055585	142055785	Promoter	RNF150
chr4	153021429	153021629	Promoter	LOC100996286
chr4	153021878	153022078	Promoter	LOC100996286
chr4	156679849	156680049	Promoter	GUCY1B3
chr4	159130491	159130691	Promoter	TMEM144
chr4	164534541	164534741	Promoter	2001-03-01
chr4	165797566	165797766	Promoter	APELA
chr4	176710052	176710252	Promoter	LOC101928590,GPM6A
chr4	183089525	183089725	Promoter	MIR1305
chr5	3537115	3537315	Promoter	LINC01019
chr5	32709201	32709401	Promoter	NPR3
chr5	32709237	32709437	Promoter	NPR3
chr5	32709296	32709496	Promoter	NPR3
chr5	35118097	35118297	Promoter	PRLR
chr5	35118167	35118367	Promoter	PRLR
chr5	35118200	35118400	Promoter	PRLR
chr5	35852566	35852766	Promoter	IL7R
chr5	39270615	39270815	Promoter	FYB
chr5	39274662	39274862	Promoter	FYB
chr5	40905155	40905355	Promoter	C7
chr5	42547012	42547212	Promoter	GHR
chr5	42547302	42547502	Promoter	GHR
chr5	43039310	43039510	Promoter	LOC153684
chr5	50265807	50266007	Promoter	LOC100287592
chr5	50266096	50266296	Promoter	LOC100287592
chr5	50266294	50266494	Promoter	LOC100287592
chr5	54040262	54040462	Promoter	LOC102467080
chr5	54397492	54397692	Promoter	GZMA
chr5	54834555	54834755	Promoter	RNF138P1,PPAP2A
chr5	56946661	56946861	Promoter	LOC101928505
chr5	60624129	60624329	Promoter	ZSWIM6
chr5	61874591	61874791	Promoter	IPO11-LRRC70
chr5	71803408	71803608	Promoter	ZNF366
chr5	73617280	73617480	Promoter	LINC01333
chr5	78281719	78281919	Promoter	ARSB
chr5	80253900	80254100	Promoter	RASGRF2
chr5	86042449	86042649	Promoter	LOC100505878
chr5	88123051	88123251	Promoter	MEF2C
chr5	94419459	94419659	Promoter	MCTP1
chr5	95159027	95159227	Promoter	GLRX
chr5	95159265	95159465	Promoter	GLRX
chr5	95159323	95159523	Promoter	GLRX
chr5	95159514	95159714	Promoter	GLRX
chr5	95159539	95159739	Promoter	GLRX
chr5	96839054	96839254	Promoter	LINC01340
chr5	111313848	111314048	Promoter	NREP
chr5	117931595	117931795	Promoter	LOC102467225
chr5	118689855	118690055	Promoter	TNFAIP8
chr5	119799120	119799320	Promoter	PRR16
chr5	121414923	121415123	Promoter	LOX
chr5	121495731	121495931	Promoter	LOC100505841
chr5	131409252	131409452	Promoter	CSF2
chr5	133772697	133772897	Promoter	LOC102546229
chr5	133839258	133839458	Promoter	LOC101927934
chr5	134876492	134876692	Promoter	NEUROG1
chr5	137073369	137073569	Promoter	KLHL3
chr5	138210649	138210849	Promoter	CTNNA1,LRRTM2
chr5	138725730	138725930	Promoter	MZB1
chr5	138725875	138726075	Promoter	MZB1
chr5	138735148	138735348	Promoter	PROB1
chr5	143191563	143191763	Promoter	HMHB1
chr5	143191576	143191776	Promoter	HMHB1
chr5	143191671	143191871	Promoter	HMHB1
chr5	148783852	148784052	Promoter	MIR143HG
chr5	148784073	148784273	Promoter	MIR143HG
chr5	148809961	148810161	Promoter	MIR145
chr5	149792683	149792883	Promoter	CD74
chr5	156536007	156536207	Promoter	HAVCR2
chr5	156607693	156607893	Promoter	ITK
chr5	160280240	160280440	Promoter	ATP10B
chr5	169724490	169724690	Promoter	LCP2
chr5	169724556	169724756	Promoter	LCP2
chr5	169724668	169724868	Promoter	LCP2
chr5	169724691	169724891	Promoter	LCP2
chr5	169724703	169724903	Promoter	LCP2
chr5	169725000	169725200	Promoter	LCP2
chr5	169757955	169758155	Promoter	LINC01366
chr5	173759928	173760128	Promoter	LINC01411
chr5	176166461	176166661	Promoter	LOC102577424
chr5	176326416	176326616	Promoter	HK3
chr5	176837751	176837951	Promoter	F12
chr5	180231094	180231294	Promoter	MGAT1
chr5	180336495	180336695	Promoter	BTNL8
chr5	180336749	180336949	Promoter	BTNL8
chr5	180580929	180581129	Promoter	OR2V2
chr6	209663	209863	Promoter	LOC285766
chr6	1102232	1102432	Promoter	LOC285768
chr6	2752260	2752460	Promoter	MYLK4
chr6	2858115	2858315	Promoter	MIR4645
chr6	2876662	2876862	Promoter	SERPINB9P1
chr6	2976664	2976864	Promoter	SERPINB6
chr6	3075908	3076108	Promoter	RIPK1
chr6	3848118	3848318	Promoter	FAM50B
chr6	6588746	6588946	Promoter	LY86
chr6	10421360	10421560	Promoter	TFAP2A
chr6	10421570	10421770	Promoter	TFAP2A
chr6	10421765	10421965	Promoter	TFAP2A
chr6	10421967	10422167	Promoter	TFAP2A
chr6	10422039	10422239	Promoter	TFAP2A
chr6	10422222	10422422	Promoter	TFAP2A
chr6	10422347	10422547	Promoter	TFAP2A
chr6	10422536	10422736	Promoter	TFAP2A
chr6	10422774	10422974	Promoter	TFAP2A
chr6	11039433	11039633	Promoter	ELOVL2-AS1
chr6	11382453	11382653	Promoter	NEDD9
chr6	11382456	11382656	Promoter	NEDD9
chr6	22147283	22147483	Promoter	CASC14
chr6	24936146	24936346	Promoter	FAM65B
chr6	24936274	24936474	Promoter	FAM65B
chr6	24936865	24937065	Promoter	FAM65B
chr6	25041812	25042012	Promoter	FAM65B
chr6	25041923	25042123	Promoter	FAM65B
chr6	25041990	25042190	Promoter	FAM65B
chr6	26361289	26361489	Promoter	BTN3A2
chr6	26367471	26367671	Promoter	BTN3A2
chr6	26367480	26367680	Promoter	BTN3A2
chr6	27729246	27729446	Promoter	LOC100131289
chr6	27880017	27880217	Promoter	OR2B2
chr6	28493501	28493701	Promoter	GPX5
chr6	29602290	29602490	Promoter	GABBR1
chr6	29717817	29718017	Promoter	HLA-F-AS1
chr6	30045180	30045380	Promoter	RNF39
chr6	30104340	30104540	Promoter	TRIM40
chr6	30104452	30104652	Promoter	TRIM40
chr6	30104493	30104693	Promoter	TRIM40
chr6	30130901	30131101	Promoter	TRIM15,TRIM10
chr6	31322814	31323014	Promoter	MIR6891
chr6	31323297	31323497	Promoter	MIR6891
chr6	31439312	31439512	Promoter	HCG26
chr6	31540361	31540561	Promoter	LTA,TNF
chr6	31542640	31542840	Promoter	TNF
chr6	31560524	31560724	Promoter	NCR3
chr6	31583815	31584015	Promoter	AIF1,PRRC2A
chr6	31705309	31705509	Promoter	CLIC1,MSH5,MSH5-SAPCD1
chr6	31765490	31765690	Promoter	VARS
chr6	32159974	32160174	Promoter	PBX2
chr6	32379405	32379605	Promoter	BTNL2
chr6	32407684	32407884	Promoter	HLA-DRA
chr6	32407738	32407938	Promoter	HLA-DRA
chr6	32808652	32808852	Promoter	TAP2,PSMB8-AS1
chr6	32813237	32813437	Promoter	PSMB8
chr6	32813341	32813541	Promoter	PSMB8
chr6	32813348	32813548	Promoter	PSMB8
chr6	32813422	32813622	Promoter	PSMB8
chr6	32813431	32813631	Promoter	PSMB8
chr6	32813444	32813644	Promoter	PSMB8
chr6	32813482	32813682	Promoter	PSMB8
chr6	32813615	32813815	Promoter	PSMB8
chr6	32822811	32823011	Promoter	TAP1
chr6	32909182	32909382	Promoter	HLA-DMB
chr6	32909340	32909540	Promoter	HLA-DMB
chr6	32909423	32909623	Promoter	HLA-DMB
chr6	32912191	32912391	Promoter	HLA-DMB
chr6	32912968	32913168	Promoter	HLA-DMB
chr6	32913025	32913225	Promoter	HLA-DMB
chr6	32920467	32920667	Promoter	HLA-DMA
chr6	32920557	32920757	Promoter	HLA-DMA
chr6	32920635	32920835	Promoter	HLA-DMA
chr6	33039381	33039581	Promoter	HLA-DPB1
chr6	33039400	33039600	Promoter	HLA-DPB1
chr6	33040435	33040635	Promoter	HLA-DPB1
chr6	33040510	33040710	Promoter	HLA-DPB1
chr6	33040814	33041014	Promoter	HLA-DPB1
chr6	33041243	33041443	Promoter	HLA-DPB1,HLA-DPA1
chr6	33044245	33044445	Promoter	HLA-DPA1
chr6	33080400	33080600	Promoter	HLA-DPB2
chr6	37470383	37470583	Promoter	CCDC167,LOC100505530
chr6	39282362	39282562	Promoter	KCNK17
chr6	41019812	41020012	Promoter	APOBEC2
chr6	41131763	41131963	Promoter	TREM2
chr6	41168701	41168901	Promoter	TREML2
chr6	44090648	44090848	Promoter	TMEM63B
chr6	45291743	45291943	Promoter	RUNX2
chr6	46143306	46143506	Promoter	ENPP5
chr6	52150356	52150556	Promoter	MCM3
chr6	53488536	53488736	Promoter	LOC101927171
chr6	75917460	75917660	Promoter	COL12A1
chr6	75918029	75918229	Promoter	COL12A1
chr6	75918065	75918265	Promoter	COL12A1
chr6	76205948	76206148	Promoter	FILIP1
chr6	101846503	101846703	Promoter	GRIK2
chr6	101846550	101846750	Promoter	GRIK2
chr6	101846607	101846807	Promoter	GRIK2
chr6	101846667	101846867	Promoter	GRIK2
chr6	101846705	101846905	Promoter	GRIK2
chr6	101846867	101847067	Promoter	GRIK2
chr6	101846958	101847158	Promoter	GRIK2
chr6	101847249	101847449	Promoter	GRIK2
chr6	106542366	106542566	Promoter	PRDM1
chr6	108145501	108145701	Promoter	SCML4
chr6	108145677	108145877	Promoter	SCML4
chr6	109245283	109245483	Promoter	ARMC2-AS1
chr6	109779958	109780158	Promoter	MICAL1
chr6	109780019	109780219	Promoter	MICAL1
chr6	112079889	112080089	Promoter	FYN
chr6	112081218	112081418	Promoter	FYN
chr6	112081438	112081638	Promoter	FYN
chr6	112557172	112557372	Promoter	LOC101927640
chr6	112557175	112557375	Promoter	LOC101927640
chr6	119031299	119031499	Promoter	CEP85L
chr6	128221953	128222153	Promoter	THEMIS
chr6	129203683	129203883	Promoter	LAMA2
chr6	129203787	129203987	Promoter	LAMA2
chr6	130536900	130537100	Promoter	SAMD3
chr6	132452353	132452553	Promoter	LINC01013
chr6	132454923	132455123	Promoter	LINC01013
chr6	133035135	133035335	Promoter	VNN1
chr6	133035185	133035385	Promoter	VNN1
chr6	133084542	133084742	Promoter	VNN2
chr6	134758704	134758904	Promoter	LINC01010
chr6	138191500	138191700	Promoter	LOC100130476
chr6	138192558	138192758	Promoter	LOC100130476
chr6	143928543	143928743	Promoter	PHACTR2
chr6	151560932	151561132	Promoter	AKAP12
chr6	152011411	152011611	Promoter	ESR1
chr6	152011556	152011756	Promoter	ESR1
chr6	152011566	152011766	Promoter	ESR1
chr6	154330978	154331178	Promoter	OPRM1
chr6	157948530	157948730	Promoter	MIR3692
chr6	157948676	157948876	Promoter	MIR3692
chr6	158400513	158400713	Promoter	SYNJ2
chr6	159066922	159067122	Promoter	DYNLT1,SYTL3
chr6	159069875	159070075	Promoter	DYNLT1,SYTL3
chr6	159070507	159070707	Promoter	DYNLT1,SYTL3
chr6	159070556	159070756	Promoter	DYNLT1,SYTL3
chr6	159070859	159071059	Promoter	SYTL3
chr6	159070908	159071108	Promoter	SYTL3
chr6	159071006	159071206	Promoter	SYTL3
chr6	159463003	159463203	Promoter	TAGAP
chr6	159463200	159463400	Promoter	TAGAP
chr6	159465118	159465318	Promoter	TAGAP
chr6	159465425	159465625	Promoter	TAGAP
chr6	160679874	160680074	Promoter	SLC22A2
chr6	166648700	166648900	Promoter	LOC101929297
chr6	166878582	166878782	Promoter	RPS6KA2-IT1
chr6	167043187	167043387	Promoter	RPS6KA2
chr6	170580985	170581185	Promoter	FLJ38122
chr6	170581148	170581348	Promoter	FLJ38122
chr6	170587894	170588094	Promoter	LOC285804
chr7	641237	641437	Promoter	LOC101926963
chr7	12624553	12624753	Promoter	SCIN
chr7	12624760	12624960	Promoter	SCIN
chr7	17336878	17337078	Promoter	AHR
chr7	18545811	18546011	Promoter	HDAC9
chr7	20259636	20259836	Promoter	MACC1
chr7	20827725	20827925	Promoter	SP8
chr7	20827882	20828082	Promoter	SP8
chr7	20829402	20829602	Promoter	SP8
chr7	20831218	20831418	Promoter	SP8
chr7	22765221	22765421	Promoter	IL6
chr7	22894695	22894895	Promoter	SNORD93
chr7	22894728	22894928	Promoter	SNORD93
chr7	22894798	22894998	Promoter	SNORD93
chr7	24611782	24611982	Promoter	MPP6
chr7	27175052	27175252	Promoter	HOXA4,HOXA-AS3
chr7	27277479	27277679	Promoter	EVX1
chr7	29184894	29185094	Promoter	CHN2
chr7	29186919	29187119	Promoter	CPVL
chr7	30951325	30951525	Promoter	AQP1
chr7	30960686	30960886	Promoter	AQP1
chr7	31725648	31725848	Promoter	PPP1R17
chr7	32114913	32115113	Promoter	PDE1C
chr7	39013576	39013776	Promoter	POU6F2
chr7	41731452	41731652	Promoter	INHBA-AS1
chr7	43796486	43796686	Promoter	BLVRA
chr7	45018558	45018758	Promoter	MYO1G
chr7	48124821	48125021	Promoter	UPP1
chr7	48127032	48127232	Promoter	UPP1
chr7	48127099	48127299	Promoter	UPP1
chr7	50346968	50347168	Promoter	IKZF1
chr7	50348074	50348274	Promoter	IKZF1
chr7	50348385	50348585	Promoter	IKZF1
chr7	50357033	50357233	Promoter	IKZF1
chr7	50357725	50357925	Promoter	IKZF1
chr7	50358094	50358294	Promoter	IKZF1
chr7	55606241	55606441	Promoter	VOPP1
chr7	55606305	55606505	Promoter	VOPP1
chr7	55606342	55606542	Promoter	VOPP1
chr7	64450826	64451026	Promoter	ZNF117
chr7	64467424	64467624	Promoter	ERV3-1
chr7	75443074	75443274	Promoter	CCL24
chr7	75443093	75443293	Promoter	CCL24
chr7	80266830	80267030	Promoter	CD36
chr7	93190236	93190436	Promoter	CALCR
chr7	93190362	93190562	Promoter	CALCR
chr7	96631480	96631680	Promoter	DLX6
chr7	96643586	96643786	Promoter	DLX6-AS1
chr7	96646979	96647179	Promoter	DLX6-AS1
chr7	96647017	96647217	Promoter	DLX6-AS1
chr7	96647223	96647423	Promoter	DLX6-AS1
chr7	96654682	96654882	Promoter	DLX5
chr7	96654686	96654886	Promoter	DLX5
chr7	96654688	96654888	Promoter	DLX5
chr7	96654732	96654932	Promoter	DLX5
chr7	96654831	96655031	Promoter	DLX5
chr7	96654944	96655144	Promoter	DLX5
chr7	96655005	96655205	Promoter	DLX5
chr7	96655401	96655601	Promoter	DLX5
chr7	96655466	96655666	Promoter	DLX5
chr7	96655698	96655898	Promoter	DLX5
chr7	96655789	96655989	Promoter	DLX5
chr7	100331391	100331591	Promoter	ZAN
chr7	100796709	100796909	Promoter	AP1S1
chr7	101005935	101006135	Promoter	COL26A1
chr7	101005958	101006158	Promoter	COL26A1
chr7	106505270	106505470	Promoter	PIK3CG
chr7	106505672	106505872	Promoter	PIK3CG
chr7	106505686	106505886	Promoter	PIK3CG
chr7	106505752	106505952	Promoter	PIK3CG
chr7	106505758	106505958	Promoter	PIK3CG
chr7	106505814	106506014	Promoter	PIK3CG
chr7	106505861	106506061	Promoter	PIK3CG
chr7	107644470	107644670	Promoter	LAMB1
chr7	107644856	107645056	Promoter	LAMB1
chr7	109600633	109600833	Promoter	EIF3IP1
chr7	112062197	112062397	Promoter	IFRD1
chr7	112062319	112062519	Promoter	IFRD1
chr7	128862033	128862233	Promoter	AHCYL2
chr7	129416953	129417153	Promoter	MIR96,MIR183
chr7	129417048	129417248	Promoter	MIR96,MIR183
chr7	129418370	129418570	Promoter	MIR96,MIR183
chr7	130793632	130793832	Promoter	MKLN1,LINC-PINT
chr7	134571394	134571594	Promoter	CALD1
chr7	134832031	134832231	Promoter	TMEM140
chr7	134832121	134832321	Promoter	TMEM140
chr7	134832332	134832532	Promoter	TMEM140
chr7	134832444	134832644	Promoter	TMEM140
chr7	134832571	134832771	Promoter	TMEM140
chr7	134832744	134832944	Promoter	TMEM140
chr7	134832750	134832950	Promoter	TMEM140
chr7	134832839	134833039	Promoter	TMEM140
chr7	134832931	134833131	Promoter	TMEM140
chr7	134833066	134833266	Promoter	TMEM140
chr7	135664752	135664952	Promoter	LUZP6,MTPN
chr7	148935961	148936161	Promoter	ZNF212
chr7	150130608	150130808	Promoter	LINC00996
chr7	150147453	150147653	Promoter	GIMAP8
chr7	150147555	150147755	Promoter	GIMAP8
chr7	150147642	150147842	Promoter	GIMAP8
chr7	150147822	150148022	Promoter	GIMAP8
chr7	150147827	150148027	Promoter	GIMAP8
chr7	150147888	150148088	Promoter	GIMAP8
chr7	150147925	150148125	Promoter	GIMAP8
chr7	150147973	150148173	Promoter	GIMAP8
chr7	150211661	150211861	Promoter	GIMAP7
chr7	150264211	150264411	Promoter	GIMAP4
chr7	150264667	150264867	Promoter	GIMAP4
chr7	150329349	150329549	Promoter	GIMAP6
chr7	150329386	150329586	Promoter	GIMAP6
chr7	150329431	150329631	Promoter	GIMAP6
chr7	150413464	150413664	Promoter	GIMAP1-GIMAP5
chr7	150434380	150434580	Promoter	GIMAP5
chr7	150548665	150548865	Promoter	AOC1
chr7	151037117	151037317	Promoter	NUB1
chr7	156807374	156807574	Promoter	MNX1
chr7	157647354	157647554	Promoter	LOC100506585
chr7	158329975	158330175	Promoter	MIR595
chr8	6783421	6783621	Promoter	DEFA6
chr8	6785602	6785802	Promoter	DEFA6
chr8	7783549	7783749	Promoter	ZNF705B
chr8	9182361	9182561	Promoter	LOC157273
chr8	11839744	11839944	Promoter	DEFB135
chr8	13372019	13372219	Promoter	DLC1
chr8	13372032	13372232	Promoter	DLC1
chr8	13372990	13373190	Promoter	DLC1
chr8	13373547	13373747	Promoter	DLC1
chr8	17555202	17555402	Promoter	MTUS1
chr8	17581146	17581346	Promoter	MTUS1
chr8	17581151	17581351	Promoter	MTUS1
chr8	21771152	21771352	Promoter	DOK2
chr8	21771178	21771378	Promoter	DOK2
chr8	21771440	21771640	Promoter	DOK2
chr8	21771568	21771768	Promoter	DOK2
chr8	22960157	22960357	Promoter	TNFRSF10C
chr8	23021617	23021817	Promoter	TNFRSF10D
chr8	25202810	25203010	Promoter	MIR6876
chr8	26725882	26726082	Promoter	ADRA1A
chr8	28174921	28175121	Promoter	PNOC
chr8	32297578	32297778	Promoter	NRG1-IT3
chr8	32503162	32503362	Promoter	NRG1
chr8	32504129	32504329	Promoter	NRG1
chr8	32577851	32578051	Promoter	NRG1
chr8	32578911	32579111	Promoter	NRG1
chr8	38008286	38008486	Promoter	STAR
chr8	38008391	38008591	Promoter	STAR
chr8	38008443	38008643	Promoter	STAR
chr8	39770275	39770475	Promoter	IDO1
chr8	39770385	39770585	Promoter	IDO1
chr8	39771350	39771550	Promoter	IDO1
chr8	41168105	41168305	Promoter	SFRP1
chr8	41169333	41169533	Promoter	SFRP1
chr8	49460491	49460691	Promoter	LOC101929268
chr8	57472934	57473134	Promoter	LINC00968
chr8	71380193	71380393	Promoter	LOC101926892
chr8	72751254	72751454	Promoter	LOC100132891
chr8	74903661	74903861	Promoter	LY96
chr8	74903701	74903901	Promoter	LY96
chr8	75260102	75260302	Promoter	GDAP1
chr8	75912088	75912288	Promoter	CRISPLD1
chr8	77591091	77591291	Promoter	ZFHX4
chr8	77596282	77596482	Promoter	ZFHX4-AS1
chr8	86371719	86371919	Promoter	CA2
chr8	91233468	91233668	Promoter	LINC00534
chr8	95229772	95229972	Promoter	CDH17
chr8	97175828	97176028	Promoter	GDF6
chr8	97400481	97400681	Promoter	LOC102724804
chr8	103135495	103135695	Promoter	MIR5680
chr8	103140665	103140865	Promoter	NCALD
chr8	104151035	104151235	Promoter	BAALC
chr8	104185401	104185601	Promoter	BAALC-AS1
chr8	118146318	118146518	Promoter	SLC30A8
chr8	119128578	119128778	Promoter	EXT1
chr8	125259590	125259790	Promoter	LOC101927588
chr8	125259714	125259914	Promoter	LOC101927588
chr8	126963407	126963607	Promoter	LINC00861
chr8	126963417	126963617	Promoter	LINC00861
chr8	128807741	128807941	Promoter	MIR1204
chr8	128807917	128808117	Promoter	MIR1204
chr8	128808094	128808294	Promoter	MIR1204
chr8	128899414	128899614	Promoter	PVT1
chr8	129060715	129060915	Promoter	MIR1207
chr8	131456958	131457158	Promoter	ASAP1
chr8	131457114	131457314	Promoter	ASAP1
chr8	133772642	133772842	Promoter	TMEM71
chr8	133772789	133772989	Promoter	TMEM71
chr8	133772993	133773193	Promoter	TMEM71
chr8	133875929	133876129	Promoter	TG
chr8	134058835	134059035	Promoter	MIR7848
chr8	134072426	134072626	Promoter	SLA
chr8	134072511	134072711	Promoter	SLA
chr8	134072606	134072806	Promoter	SLA
chr8	134073697	134073897	Promoter	SLA
chr8	142015072	142015272	Promoter	PTK2
chr8	143813188	143813388	Promoter	LOC100288181
chr8	144778730	144778930	Promoter	BREA2
chr8	145029503	145029703	Promoter	PLEC
chr8	145086143	145086343	Promoter	SPATC1
chr8	145086200	145086400	Promoter	SPATC1
chr8	145839359	145839559	Promoter	ARHGAP39
chr9	272158	272358	Promoter	DOCK8
chr9	272168	272368	Promoter	DOCK8
chr9	272938	273138	Promoter	DOCK8
chr9	14992072	14992272	Promoter	LOC389705
chr9	23823025	23823225	Promoter	ELAVL2
chr9	26954208	26954408	Promoter	IFT74
chr9	33749116	33749316	Promoter	PRSS3
chr9	34459944	34460144	Promoter	FAM219A
chr9	35619232	35619432	Promoter	CD72
chr9	35619485	35619685	Promoter	CD72
chr9	35619719	35619919	Promoter	CD72
chr9	35650461	35650661	Promoter	SIT1
chr9	35870388	35870588	Promoter	OR13J1
chr9	38622459	38622659	Promoter	ANKRD18A
chr9	71161508	71161708	Promoter	LINC01506
chr9	71161729	71161929	Promoter	LINC01506
chr9	79631637	79631837	Promoter	FOXB2
chr9	79631806	79632006	Promoter	FOXB2
chr9	79632125	79632325	Promoter	FOXB2
chr9	92096195	92096395	Promoter	SEMA4D
chr9	95726133	95726333	Promoter	FGD3
chr9	95726347	95726547	Promoter	FGD3
chr9	96937997	96938197	Promoter	MIRLET7A1,MIRLET7F1,MIRLET7D
chr9	98879957	98880157	Promoter	LOC158434
chr9	100159680	100159880	Promoter	LOC286359
chr9	100700817	100701017	Promoter	HEMGN
chr9	106760482	106760682	Promoter	LOC101928523
chr9	112085969	112086169	Promoter	EPB41L4B
chr9	116355521	116355721	Promoter	RGS3
chr9	116840725	116840925	Promoter	AMBP
chr9	117692645	117692845	Promoter	TNFSF8
chr9	117692875	117693075	Promoter	TNFSF8
chr9	117692910	117693110	Promoter	TNFSF8
chr9	117692971	117693171	Promoter	TNFSF8
chr9	120466535	120466735	Promoter	TLR4
chr9	120466540	120466740	Promoter	TLR4
chr9	123688615	123688815	Promoter	TRAF1
chr9	123688645	123688845	Promoter	TRAF1
chr9	123688785	123688985	Promoter	TRAF1
chr9	123689093	123689293	Promoter	TRAF1
chr9	127019607	127019807	Promoter	NEK6
chr9	129372249	129372449	Promoter	LMX1B
chr9	129372874	129373074	Promoter	LMX1B
chr9	130473496	130473696	Promoter	TTC16
chr9	130540841	130541041	Promoter	SH2D3C
chr9	130541024	130541224	Promoter	SH2D3C
chr9	130541352	130541552	Promoter	SH2D3C
chr9	130541678	130541878	Promoter	SH2D3C
chr9	131872479	131872679	Promoter	PPP2R4,CRAT
chr9	134151419	134151619	Promoter	FAM78A
chr9	139892268	139892468	Promoter	CLIC3
chr9	139892431	139892631	Promoter	CLIC3
chr9	140172090	140172290	Promoter	TOR4A
chr9	140356657	140356857	Promoter	NSMF
chr10	4289062	4289262	Promoter	LINC00702
chr10	5064296	5064496	Promoter	AKR1C2
chr10	5859360	5859560	Promoter	GDI2
chr10	6190551	6190751	Promoter	MIR3155A
chr10	8093139	8093339	Promoter	GATA3
chr10	8093276	8093476	Promoter	GATA3
chr10	8093303	8093503	Promoter	GATA3
chr10	8093316	8093516	Promoter	GATA3
chr10	8093993	8094193	Promoter	GATA3-AS1,GATA3
chr10	8094042	8094242	Promoter	GATA3-AS1,GATA3
chr10	8094331	8094531	Promoter	GATA3-AS1,GATA3
chr10	8094434	8094634	Promoter	GATA3-AS1,GATA3
chr10	8094541	8094741	Promoter	GATA3-AS1,GATA3
chr10	8094579	8094779	Promoter	GATA3-AS1,GATA3
chr10	11204858	11205058	Promoter	CELF2
chr10	13258881	13259081	Promoter	RNU6-2
chr10	14614100	14614300	Promoter	FAM107B
chr10	15211966	15212166	Promoter	NMT2
chr10	26726737	26726937	Promoter	APBB1IP
chr10	29892029	29892229	Promoter	MIR938
chr10	31288187	31288387	Promoter	ZNF438
chr10	33248985	33249185	Promoter	ITGB1
chr10	34061497	34061697	Promoter	LINC00838
chr10	44353185	44353385	Promoter	LINC00840
chr10	45496095	45496295	Promoter	ZNF22,C10orf25
chr10	49893236	49893436	Promoter	WDFY4
chr10	49893246	49893446	Promoter	WDFY4
chr10	50343950	50344150	Promoter	FAM170B
chr10	50343977	50344177	Promoter	FAM170B
chr10	50396325	50396525	Promoter	C10orf128
chr10	60474152	60474352	Promoter	FAM133CP
chr10	72362192	72362392	Promoter	PRF1
chr10	72362518	72362718	Promoter	PRF1
chr10	72362594	72362794	Promoter	PRF1
chr10	72362709	72362909	Promoter	PRF1
chr10	81370314	81370514	Promoter	SFTPA1
chr10	87336867	87337067	Promoter	GRID1-AS1
chr10	90612873	90613073	Promoter	ANKRD22
chr10	94590696	94590896	Promoter	EXOC6
chr10	94590784	94590984	Promoter	EXOC6
chr10	94590795	94590995	Promoter	EXOC6
chr10	94590997	94591197	Promoter	EXOC6
chr10	95868003	95868203	Promoter	PLCE1-AS2
chr10	97201072	97201272	Promoter	SORBS1
chr10	97201122	97201322	Promoter	SORBS1
chr10	99165991	99166191	Promoter	RRP12
chr10	105277836	105278036	Promoter	NEURL1-AS1
chr10	105978602	105978802	Promoter	MIR609
chr10	106027815	106028015	Promoter	GSTO2,MIR4482
chr10	112628788	112628988	Promoter	PDCD4
chr10	112628834	112629034	Promoter	PDCD4
chr10	112628842	112629042	Promoter	PDCD4
chr10	114134778	114134978	Promoter	ACSL5
chr10	114134815	114135015	Promoter	ACSL5
chr10	114134954	114135154	Promoter	ACSL5
chr10	114134992	114135192	Promoter	ACSL5
chr10	114135953	114136153	Promoter	ACSL5
chr10	114135973	114136173	Promoter	ACSL5
chr10	114708873	114709073	Promoter	TCF7L2
chr10	115998032	115998232	Promoter	VWA2
chr10	119306559	119306759	Promoter	EMX2OS
chr10	119307592	119307792	Promoter	EMX2OS
chr10	119307669	119307869	Promoter	EMX2OS
chr10	122357456	122357656	Promoter	LINC01561
chr10	123922870	123923070	Promoter	TACC2
chr10	123922950	123923150	Promoter	TACC2
chr10	123922966	123923166	Promoter	TACC2
chr10	123922999	123923199	Promoter	TACC2
chr10	123923173	123923373	Promoter	TACC2
chr10	124219464	124219664	Promoter	HTRA1
chr10	126140041	126140241	Promoter	NKX1-2
chr10	126142866	126143066	Promoter	NKX1-2
chr10	126390559	126390759	Promoter	FAM53B-AS1
chr10	126390898	126391098	Promoter	FAM53B-AS1
chr10	127262751	127262951	Promoter	TEX36-AS1
chr10	128080099	128080299	Promoter	ADAM12
chr10	128592424	128592624	Promoter	DOCK1
chr10	133622785	133622985	Promoter	LINC01164
chr10	134143435	134143635	Promoter	LRRC27
chr10	134150442	134150642	Promoter	LRRC27
chr10	134150600	134150800	Promoter	LRRC27
chr10	134776618	134776818	Promoter	LINC01167,LINC01168
chr10	135202696	135202896	Promoter	MTG1
chr10	135202739	135202939	Promoter	MTG1
chr11	414851	415051	Promoter	SIGIRR
chr11	415011	415211	Promoter	SIGIRR
chr11	415357	415557	Promoter	SIGIRR
chr11	1873784	1873984	Promoter	LSP1
chr11	2321670	2321870	Promoter	TSPAN32
chr11	2321700	2321900	Promoter	TSPAN32
chr11	2321703	2321903	Promoter	TSPAN32
chr11	2402291	2402491	Promoter	CD81-AS1
chr11	2919698	2919898	Promoter	SLC22A18
chr11	2919708	2919908	Promoter	SLC22A18
chr11	2919952	2920152	Promoter	SLC22A18
chr11	2920046	2920246	Promoter	SLC22A18
chr11	2920089	2920289	Promoter	SLC22A18
chr11	2920109	2920309	Promoter	SLC22A18
chr11	3647554	3647754	Promoter	TRPC2
chr11	4566753	4566953	Promoter	OR52M1
chr11	5264908	5265108	Promoter	HBBP1
chr11	7488293	7488493	Promoter	LOC100506258
chr11	8986740	8986940	Promoter	TMEM9B
chr11	10316751	10316951	Promoter	SBF2
chr11	10590182	10590382	Promoter	LYVE1
chr11	15664036	15664236	Promoter	LOC102724957
chr11	18258863	18259063	Promoter	SAA4
chr11	18434071	18434271	Promoter	LDHC
chr11	26351623	26351823	Promoter	ANO3
chr11	33915215	33915415	Promoter	LMO2
chr11	35441557	35441757	Promoter	SLC1A2
chr11	35441696	35441896	Promoter	SLC1A2
chr11	35441781	35441981	Promoter	SLC1A2
chr11	36397023	36397223	Promoter	PRR5L
chr11	36397027	36397227	Promoter	PRR5L
chr11	38668440	38668640	Promoter	LOC103312105,LINC01493
chr11	45114742	45114942	Promoter	PRDM11
chr11	45114807	45115007	Promoter	PRDM11
chr11	55736972	55737172	Promoter	OR10AG1
chr11	57006173	57006373	Promoter	APLNR
chr11	57798763	57798963	Promoter	OR6Q1
chr11	59634176	59634376	Promoter	TCN1
chr11	60145978	60146178	Promoter	MS4A7
chr11	60223138	60223338	Promoter	MS4A1
chr11	60223191	60223391	Promoter	MS4A1
chr11	60738871	60739071	Promoter	CD6
chr11	60738895	60739095	Promoter	CD6
chr11	60738905	60739105	Promoter	CD6
chr11	60738919	60739119	Promoter	CD6
chr11	60739072	60739272	Promoter	CD6
chr11	60869660	60869860	Promoter	CD5
chr11	60869810	60870010	Promoter	CD5
chr11	62693356	62693556	Promoter	CHRM1
chr11	63273407	63273607	Promoter	LGALS12
chr11	63273465	63273665	Promoter	LGALS12
chr11	63303299	63303499	Promoter	RARRES3
chr11	63303998	63304198	Promoter	RARRES3
chr11	63973746	63973946	Promoter	FERMT3
chr11	64107417	64107617	Promoter	CCDC88B
chr11	64704181	64704381	Promoter	GPHA2
chr11	64757763	64757963	Promoter	BATF2
chr11	64757839	64758039	Promoter	BATF2
chr11	65407634	65407834	Promoter	SIPA1
chr11	65724370	65724570	Promoter	SART1
chr11	67171376	67171576	Promoter	TBC1D10C,PPP1CA
chr11	67205095	67205295	Promoter	PTPRCAP
chr11	68450167	68450367	Promoter	GAL
chr11	69520171	69520371	Promoter	FGF19
chr11	69520318	69520518	Promoter	FGF19
chr11	69919424	69919624	Promoter	ANO1
chr11	69919890	69920090	Promoter	ANO1
chr11	70705735	70705935	Promoter	SHANK2-AS3
chr11	71532894	71533094	Promoter	ZNF705E
chr11	76383765	76383965	Promoter	LRRC32
chr11	77791853	77792053	Promoter	NDUFC2-KCTD14
chr11	79152721	79152921	Promoter	TENM4
chr11	79152869	79153069	Promoter	TENM4
chr11	84029697	84029897	Promoter	DLG2
chr11	89224902	89225102	Promoter	NOX4
chr11	89224914	89225114	Promoter	NOX4
chr11	89224942	89225142	Promoter	NOX4
chr11	93451522	93451722	Promoter	SCARNA9
chr11	104917668	104917868	Promoter	CARD16
chr11	105479867	105480067	Promoter	GRIA4
chr11	108096394	108096594	Promoter	NPAT
chr11	112352871	112353071	Promoter	LOC101928823
chr11	118085181	118085381	Promoter	AMICA1
chr11	118095444	118095644	Promoter	AMICA1
chr11	118095639	118095839	Promoter	AMICA1
chr11	118098652	118098852	Promoter	AMICA1
chr11	118175072	118175272	Promoter	CD3E
chr11	118213172	118213372	Promoter	CD3D,CD3G
chr11	118213966	118214166	Promoter	CD3D,CD3G
chr11	118214195	118214395	Promoter	CD3D,CD3G
chr11	123910569	123910769	Promoter	OR10G7
chr11	124413129	124413329	Promoter	OR8B12
chr11	124767701	124767901	Promoter	ROBO4
chr11	124767725	124767925	Promoter	ROBO4
chr11	124767740	124767940	Promoter	ROBO4
chr11	124767833	124768033	Promoter	ROBO4
chr11	124767874	124768074	Promoter	ROBO4
chr11	125036285	125036485	Promoter	PKNOX2-AS1
chr11	125657938	125658138	Promoter	PATE3
chr11	126222127	126222327	Promoter	ST3GAL4
chr11	126224885	126225085	Promoter	ST3GAL4-AS1,ST3GAL4
chr11	128389351	128389551	Promoter	MIR6090
chr11	128392963	128393163	Promoter	LOC101929517,ETS1
chr11	128565909	128566109	Promoter	SENCR
chr11	128566287	128566487	Promoter	SENCR
chr11	129242430	129242630	Promoter	BARX2
chr11	130536752	130536952	Promoter	MIR8052
chr11	131779483	131779683	Promoter	NTM
chr11	131779504	131779704	Promoter	NTM
chr11	133403111	133403311	Promoter	OPCML
chr12	719545	719745	Promoter	NINJ2
chr12	719649	719849	Promoter	NINJ2
chr12	6055330	6055530	Promoter	ANO2
chr12	6553045	6553245	Promoter	CD27
chr12	6664772	6664972	Promoter	IFFO1
chr12	6665008	6665208	Promoter	IFFO1
chr12	6665188	6665388	Promoter	IFFO1
chr12	6665230	6665430	Promoter	IFFO1
chr12	6665235	6665435	Promoter	IFFO1
chr12	6665270	6665470	Promoter	IFFO1
chr12	6665324	6665524	Promoter	IFFO1
chr12	6665347	6665547	Promoter	IFFO1
chr12	7905280	7905480	Promoter	CLEC4C
chr12	7916271	7916471	Promoter	NANOGNB
chr12	8218920	8219120	Promoter	C3AR1
chr12	8607514	8607714	Promoter	CLEC6A
chr12	8693442	8693642	Promoter	CLEC4E
chr12	8694928	8695128	Promoter	CLEC4E
chr12	9142172	9142372	Promoter	KLRG1
chr12	9269078	9269278	Promoter	A2M
chr12	9768049	9768249	Promoter	LOC374443
chr12	9822187	9822387	Promoter	CLEC2D
chr12	9885724	9885924	Promoter	CLECL1
chr12	9913957	9914157	Promoter	CD69
chr12	9913986	9914186	Promoter	CD69
chr12	9914285	9914485	Promoter	CD69
chr12	9917253	9917453	Promoter	CD69
chr12	9917274	9917474	Promoter	CD69
chr12	10097053	10097253	Promoter	LOC100506159
chr12	10103450	10103650	Promoter	CLEC12A
chr12	10103712	10103912	Promoter	CLEC12A
chr12	10183980	10184180	Promoter	LOC102724020
chr12	10456785	10456985	Promoter	KLRD1
chr12	10542632	10542832	Promoter	KLRK1
chr12	10544983	10545183	Promoter	KLRK1
chr12	11698434	11698634	Promoter	LINC01252
chr12	18890733	18890933	Promoter	CAPZA3,PLCZ1
chr12	21282913	21283113	Promoter	SLCO1B1
chr12	22090131	22090331	Promoter	ABCC9
chr12	24375305	24375505	Promoter	LOC101928471
chr12	25205029	25205229	Promoter	LRMP
chr12	25205368	25205568	Promoter	LRMP
chr12	25205397	25205597	Promoter	LRMP
chr12	29470740	29470940	Promoter	LOC100506606
chr12	30947874	30948074	Promoter	LINC00941
chr12	30948536	30948736	Promoter	LINC00941
chr12	44226293	44226493	Promoter	TMEM117
chr12	47609906	47610106	Promoter	PCED1B-AS1
chr12	47610120	47610320	Promoter	PCED1B-AS1
chr12	47610157	47610357	Promoter	PCED1B-AS1
chr12	47610176	47610376	Promoter	PCED1B-AS1
chr12	47610271	47610471	Promoter	PCED1B-AS1
chr12	47610318	47610518	Promoter	PCED1B-AS1
chr12	47610634	47610834	Promoter	PCED1B-AS1
chr12	48399040	48399240	Promoter	COL2A1
chr12	49367811	49368011	Promoter	WNT10B,WNT1
chr12	49371651	49371851	Promoter	WNT1
chr12	49688880	49689080	Promoter	PRPH
chr12	51788185	51788385	Promoter	GALNT6
chr12	52484365	52484565	Promoter	OR7E47P
chr12	52688998	52689198	Promoter	KRT81
chr12	52761785	52761985	Promoter	KRT85
chr12	53075316	53075516	Promoter	KRT1
chr12	53075331	53075531	Promoter	KRT1
chr12	53075382	53075582	Promoter	KRT1
chr12	53172380	53172580	Promoter	KRT76
chr12	53193225	53193425	Promoter	KRT3
chr12	53229933	53230133	Promoter	KRT79
chr12	53244430	53244630	Promoter	KRT78
chr12	53496629	53496829	Promoter	SOAT2
chr12	53602818	53603018	Promoter	ITGB7
chr12	54328910	54329110	Promoter	HOXC13
chr12	54329835	54330035	Promoter	HOXC13
chr12	54331110	54331310	Promoter	HOXC13
chr12	54363557	54363757	Promoter	HOTAIR,HOXC11
chr12	54396254	54396454	Promoter	HOXC-AS1
chr12	54396340	54396540	Promoter	HOXC-AS1
chr12	54398418	54398618	Promoter	HOXC8,HOXC-AS1
chr12	54398665	54398865	Promoter	HOXC8,HOXC-AS1
chr12	54398709	54398909	Promoter	HOXC8
chr12	54398791	54398991	Promoter	HOXC8
chr12	54399154	54399354	Promoter	HOXC8
chr12	54399368	54399568	Promoter	HOXC8
chr12	54400394	54400594	Promoter	HOXC8
chr12	54408564	54408764	Promoter	HOXC4,HOXC5,HOXC6
chr12	54409236	54409436	Promoter	HOXC4,HOXC5,HOXC6
chr12	54409385	54409585	Promoter	HOXC4,HOXC5,HOXC6
chr12	54409391	54409591	Promoter	HOXC4,HOXC5,HOXC6
chr12	54409499	54409699	Promoter	HOXC4,HOXC5,HOXC6
chr12	54409557	54409757	Promoter	HOXC4,HOXC5,HOXC6
chr12	54420737	54420937	Promoter	HOXC6
chr12	54424579	54424779	Promoter	HOXC5,MIR615
chr12	54443947	54444147	Promoter	HOXC4
chr12	54447120	54447320	Promoter	FLJ12825,HOXC4
chr12	54447330	54447530	Promoter	FLJ12825,HOXC4
chr12	54447484	54447684	Promoter	FLJ12825,HOXC4
chr12	54447496	54447696	Promoter	FLJ12825,HOXC4
chr12	54447532	54447732	Promoter	FLJ12825,HOXC4
chr12	54447773	54447973	Promoter	FLJ12825,HOXC4
chr12	54447990	54448190	Promoter	FLJ12825,HOXC4
chr12	54758284	54758484	Promoter	GPR84
chr12	54758322	54758522	Promoter	GPR84
chr12	54891391	54891591	Promoter	NCKAP1L
chr12	54891536	54891736	Promoter	NCKAP1L
chr12	54892447	54892647	Promoter	NCKAP1L
chr12	55378069	55378269	Promoter	TESPA1
chr12	55378311	55378511	Promoter	TESPA1
chr12	55378491	55378691	Promoter	TESPA1
chr12	55378521	55378721	Promoter	TESPA1
chr12	55378538	55378738	Promoter	TESPA1
chr12	55378554	55378754	Promoter	TESPA1
chr12	55378784	55378984	Promoter	TESPA1
chr12	55378812	55379012	Promoter	TESPA1
chr12	57873604	57873804	Promoter	ARHGAP9
chr12	57873632	57873832	Promoter	ARHGAP9
chr12	57873780	57873980	Promoter	ARHGAP9
chr12	58135135	58135335	Promoter	AGAP2,TSPAN31
chr12	68553609	68553809	Promoter	IFNG
chr12	68553719	68553919	Promoter	IFNG
chr12	68848894	68849094	Promoter	LOC100507195
chr12	70634249	70634449	Promoter	CNOT2
chr12	71031190	71031390	Promoter	PTPRB
chr12	75872037	75872237	Promoter	GLIPR1
chr12	75874693	75874893	Promoter	GLIPR1
chr12	76479415	76479615	Promoter	NAP1L1
chr12	81109564	81109764	Promoter	MYF5
chr12	81109575	81109775	Promoter	MYF5
chr12	91401588	91401788	Promoter	EPYC
chr12	105503574	105503774	Promoter	LOC414300
chr12	106533767	106533967	Promoter	NUAK1
chr12	109026755	109026955	Promoter	SELPLG
chr12	109026856	109027056	Promoter	SELPLG
chr12	109027583	109027783	Promoter	SELPLG
chr12	109027770	109027970	Promoter	SELPLG
chr12	109027832	109028032	Promoter	SELPLG
chr12	111872187	111872387	Promoter	SH2B3
chr12	111872236	111872436	Promoter	SH2B3
chr12	113340241	113340441	Promoter	OAS1
chr12	113415783	113415983	Promoter	OAS2
chr12	115123775	115123975	Promoter	TBX3
chr12	115124668	115124868	Promoter	TBX3
chr12	115125961	115126161	Promoter	TBX3
chr12	115126808	115127008	Promoter	TBX3
chr12	120688277	120688477	Promoter	PXN
chr12	120689945	120690145	Promoter	PXN
chr12	120691386	120691586	Promoter	PXN
chr12	123218175	123218375	Promoter	HCAR1
chr12	123713453	123713653	Promoter	C12orf65
chr12	130529414	130529614	Promoter	LOC100190940
chr12	131003675	131003875	Promoter	RIMBP2
chr13	23952476	23952676	Promoter	SACS
chr13	24828444	24828644	Promoter	SPATA13-AS1
chr13	24828592	24828792	Promoter	SPATA13-AS1
chr13	24844142	24844342	Promoter	SPATA13
chr13	24844584	24844784	Promoter	SPATA13
chr13	24844746	24844946	Promoter	SPATA13
chr13	24844752	24844952	Promoter	SPATA13
chr13	24844796	24844996	Promoter	SPATA13
chr13	25747157	25747357	Promoter	AMER2
chr13	25747350	25747550	Promoter	AMER2
chr13	30510079	30510279	Promoter	LINC00544
chr13	30947613	30947813	Promoter	LINC00426
chr13	30948003	30948203	Promoter	LINC00426
chr13	30948014	30948214	Promoter	LINC00426
chr13	30948022	30948222	Promoter	LINC00426
chr13	31287342	31287542	Promoter	ALOX5AP
chr13	31287407	31287607	Promoter	ALOX5AP
chr13	31506170	31506370	Promoter	TEX26,TEX26-AS1
chr13	33589185	33589385	Promoter	KL
chr13	33761191	33761391	Promoter	STARD13
chr13	38060276	38060476	Promoter	LINC01048
chr13	40794728	40794928	Promoter	LINC00548
chr13	40795644	40795844	Promoter	LINC00548
chr13	40795791	40795991	Promoter	LINC00548
chr13	41556039	41556239	Promoter	ELF1
chr13	41556398	41556598	Promoter	ELF1
chr13	41556459	41556659	Promoter	ELF1
chr13	46756109	46756309	Promoter	LCP1
chr13	50024603	50024803	Promoter	SETDB2
chr13	51485503	51485703	Promoter	RNASEH2B-AS1
chr13	77605619	77605819	Promoter	FBXL3
chr13	80054131	80054331	Promoter	NDFIP2
chr13	80445378	80445578	Promoter	LINC00382
chr13	88327909	88328109	Promoter	MIR4500HG
chr13	93373045	93373245	Promoter	GPC5-AS1
chr13	98606007	98606207	Promoter	IPO5
chr13	98606096	98606296	Promoter	IPO5
chr13	98859234	98859434	Promoter	MIR3170
chr13	99910487	99910687	Promoter	GPR18
chr13	99959506	99959706	Promoter	GPR183
chr13	99960098	99960298	Promoter	GPR183
chr13	99962735	99962935	Promoter	GPR183
chr13	100149211	100149411	Promoter	TM9SF2
chr13	103935569	103935769	Promoter	MIR548AS
chr13	106117325	106117525	Promoter	DAOA
chr13	107026584	107026784	Promoter	LINC00460
chr13	107028785	107028985	Promoter	LINC00460
chr13	107029023	107029223	Promoter	LINC00460
chr13	110956661	110956861	Promoter	COL4A2
chr13	111837077	111837277	Promoter	ARHGEF7
chr13	115078724	115078924	Promoter	CHAMP1
chr14	21270307	21270507	Promoter	RNASE1
chr14	23288893	23289093	Promoter	SLC7A7
chr14	23289014	23289214	Promoter	SLC7A7
chr14	23589319	23589519	Promoter	CEBPE
chr14	23841654	23841854	Promoter	CMTM5,IL25
chr14	24782356	24782556	Promoter	LTB4R,CIDEB
chr14	24782434	24782634	Promoter	LTB4R,CIDEB
chr14	24838069	24838269	Promoter	NFATC4
chr14	24838084	24838284	Promoter	NFATC4
chr14	24894595	24894795	Promoter	KHNYN
chr14	25103446	25103646	Promoter	GZMB
chr14	32675336	32675536	Promoter	RNU6-2
chr14	39702042	39702242	Promoter	MIA2
chr14	50510748	50510948	Promoter	LOC100506499
chr14	52732199	52732399	Promoter	PTGDR
chr14	56231504	56231704	Promoter	RPL13AP3
chr14	60632432	60632632	Promoter	DHRS7
chr14	62462260	62462460	Promoter	SYT16
chr14	75988551	75988751	Promoter	BATF
chr14	75989103	75989303	Promoter	BATF
chr14	81408841	81409041	Promoter	CEP128
chr14	88490233	88490433	Promoter	LINC01146
chr14	88493164	88493364	Promoter	LOC101928791
chr14	92333665	92333865	Promoter	TC2N
chr14	93532463	93532663	Promoter	ITPK1-AS1
chr14	93532532	93532732	Promoter	ITPK1-AS1
chr14	94254192	94254392	Promoter	PRIMA1
chr14	94254251	94254451	Promoter	PRIMA1
chr14	94423299	94423499	Promoter	ASB2
chr14	94442860	94443060	Promoter	ASB2
chr14	94442955	94443155	Promoter	ASB2
chr14	94834663	94834863	Promoter	SERPINA2
chr14	94943909	94944109	Promoter	SERPINA9
chr14	94946603	94946803	Promoter	SERPINA9
chr14	95026788	95026988	Promoter	SERPINA4
chr14	95047491	95047691	Promoter	SERPINA5
chr14	95047532	95047732	Promoter	SERPINA5
chr14	95047555	95047755	Promoter	SERPINA5
chr14	95794368	95794568	Promoter	LOC101929080
chr14	97924915	97925115	Promoter	LOC101929241
chr14	99177887	99178087	Promoter	C14orf177
chr14	100531231	100531431	Promoter	EVL
chr14	100531491	100531691	Promoter	EVL
chr14	100531497	100531697	Promoter	EVL
chr14	100531700	100531900	Promoter	EVL
chr14	100784681	100784881	Promoter	SLC25A47
chr14	101391405	101391605	Promoter	SNORD113-1,SNORD113-2
chr14	105536442	105536642	Promoter	GPR132
chr14	105771779	105771979	Promoter	BRF1
chr15	22542000	22542200	Promoter	REREP3
chr15	30117581	30117781	Promoter	TJP1
chr15	33601770	33601970	Promoter	RYR3
chr15	37178669	37178869	Promoter	LOC145845
chr15	38988433	38988633	Promoter	C15orf53
chr15	38988460	38988660	Promoter	C15orf53
chr15	38988669	38988869	Promoter	C15orf53
chr15	38988760	38988960	Promoter	C15orf53
chr15	39542777	39542977	Promoter	C15orf54
chr15	40599999	40600199	Promoter	PLCB2
chr15	40600179	40600379	Promoter	PLCB2
chr15	40600393	40600593	Promoter	PLCB2
chr15	42344100	42344300	Promoter	PLA2G4E
chr15	44956113	44956313	Promoter	SPG11
chr15	45002497	45002697	Promoter	B2M
chr15	45027998	45028198	Promoter	TRIM69
chr15	45028170	45028370	Promoter	TRIM69
chr15	45028495	45028695	Promoter	TRIM69
chr15	48008456	48008656	Promoter	SEMA6D
chr15	48139217	48139417	Promoter	LINC01491
chr15	50839484	50839684	Promoter	USP50
chr15	51970413	51970613	Promoter	SCG3
chr15	52408429	52408629	Promoter	BCL2L10
chr15	52975131	52975331	Promoter	FAM214A
chr15	54304678	54304878	Promoter	UNC13C
chr15	55665136	55665336	Promoter	MIR628
chr15	56760807	56761007	Promoter	MNS1
chr15	62458641	62458841	Promoter	C2CD4B
chr15	64339839	64340039	Promoter	DAPK2
chr15	65129716	65129916	Promoter	PLEKHO2
chr15	65285569	65285769	Promoter	SPG21
chr15	68904943	68905143	Promoter	CORO2B
chr15	68919901	68920101	Promoter	CORO2B
chr15	72598663	72598863	Promoter	CELF6
chr15	75085092	75085292	Promoter	MIR4513
chr15	75335363	75335563	Promoter	PPCDC
chr15	75335424	75335624	Promoter	PPCDC
chr15	78374696	78374896	Promoter	TBC1D2B,MIR5003
chr15	78914267	78914467	Promoter	CHRNA3
chr15	80263118	80263318	Promoter	BCL2A1
chr15	80263239	80263439	Promoter	BCL2A1
chr15	80263532	80263732	Promoter	BCL2A1
chr15	80263536	80263736	Promoter	BCL2A1
chr15	81587969	81588169	Promoter	IL16
chr15	81588797	81588997	Promoter	IL16
chr15	81589148	81589348	Promoter	IL16
chr15	81589173	81589373	Promoter	IL16
chr15	85141533	85141733	Promoter	ZSCAN2
chr15	89178676	89178876	Promoter	ISG20
chr15	89178756	89178956	Promoter	ISG20
chr15	89178774	89178974	Promoter	ISG20
chr15	89872884	89873084	Promoter	MIR6766
chr15	90394925	90395125	Promoter	MIR5094
chr15	96871476	96871676	Promoter	NR2F2,NR2F2-AS1,MIR1469
chr15	96872409	96872609	Promoter	NR2F2,NR2F2-AS1,MIR1469
chr15	99793777	99793977	Promoter	TTC23,HSP90B2P
chr16	1354404	1354604	Promoter	UBE2I
chr16	3057859	3058059	Promoter	CLDN9
chr16	3115033	3115233	Promoter	IL32
chr16	3265367	3265567	Promoter	OR1F2P
chr16	3627241	3627441	Promoter	NLRC3
chr16	3627446	3627646	Promoter	NLRC3
chr16	3627546	3627746	Promoter	NLRC3
chr16	3627630	3627830	Promoter	NLRC3
chr16	3628312	3628512	Promoter	NLRC3
chr16	11837447	11837647	Promoter	TXNDC11
chr16	28505220	28505420	Promoter	APOBR,CLN3
chr16	28505387	28505587	Promoter	APOBR,CLN3
chr16	28505786	28505986	Promoter	APOBR,CLN3
chr16	28505859	28506059	Promoter	APOBR,CLN3
chr16	28505915	28506115	Promoter	APOBR,CLN3
chr16	28519336	28519536	Promoter	IL27
chr16	28995944	28996144	Promoter	LAT
chr16	28995953	28996153	Promoter	LAT
chr16	28996433	28996633	Promoter	LAT
chr16	29086163	29086363	Promoter	RRN3P2
chr16	29674084	29674284	Promoter	SPN
chr16	29674803	29675003	Promoter	SPN
chr16	29756851	29757051	Promoter	C16orf54
chr16	29757218	29757418	Promoter	C16orf54
chr16	29757223	29757423	Promoter	C16orf54
chr16	29877676	29877876	Promoter	CDIPT
chr16	30197264	30197464	Promoter	LOC606724
chr16	30198405	30198605	Promoter	LOC606724
chr16	30393754	30393954	Promoter	2001-09-01
chr16	30394132	30394332	Promoter	2001-09-01
chr16	30482493	30482693	Promoter	ITGAL
chr16	30483613	30483813	Promoter	ITGAL
chr16	30483861	30484061	Promoter	ITGAL
chr16	30483896	30484096	Promoter	ITGAL
chr16	30484118	30484318	Promoter	ITGAL
chr16	31188634	31188834	Promoter	FUS
chr16	31271140	31271340	Promoter	ITGAM
chr16	50700964	50701164	Promoter	LOC101927272
chr16	50715035	50715235	Promoter	SNX20
chr16	50715092	50715292	Promoter	SNX20
chr16	50715160	50715360	Promoter	SNX20
chr16	50715311	50715511	Promoter	SNX20
chr16	50715345	50715545	Promoter	SNX20
chr16	50715429	50715629	Promoter	SNX20
chr16	50715600	50715800	Promoter	SNX20
chr16	50717678	50717878	Promoter	SNX20
chr16	50718039	50718239	Promoter	SNX20
chr16	51051263	51051463	Promoter	LOC101927334
chr16	52117853	52118053	Promoter	LOC102467079
chr16	52582162	52582362	Promoter	TOX3
chr16	54322394	54322594	Promoter	IRX3
chr16	54323812	54324012	Promoter	IRX3
chr16	55512624	55512824	Promoter	MMP2
chr16	55512706	55512906	Promoter	MMP2
chr16	55512722	55512922	Promoter	MMP2
chr16	55512836	55513036	Promoter	MMP2
chr16	55990541	55990741	Promoter	CES5A
chr16	55990743	55990943	Promoter	CES5A
chr16	56233277	56233477	Promoter	DKFZP434H168
chr16	56684954	56685154	Promoter	MT1B
chr16	66637601	66637801	Promoter	CMTM3
chr16	67278514	67278714	Promoter	SLC9A5
chr16	67428055	67428255	Promoter	TPPP3
chr16	67428215	67428415	Promoter	TPPP3
chr16	68018767	68018967	Promoter	DPEP3
chr16	68676455	68676655	Promoter	CDH3
chr16	68676641	68676841	Promoter	CDH3
chr16	68676706	68676906	Promoter	CDH3
chr16	70060172	70060372	Promoter	MIR1972-1,MIR1972-2
chr16	70839785	70839985	Promoter	VAC14
chr16	72206141	72206341	Promoter	PMFBP1
chr16	73094079	73094279	Promoter	ZFHX3
chr16	73179390	73179590	Promoter	C16orf47
chr16	75255490	75255690	Promoter	LOC100506281
chr16	75685154	75685354	Promoter	KARS
chr16	82067299	82067499	Promoter	HSD17B2
chr16	83839639	83839839	Promoter	LOC102724163,HSBP1
chr16	83839802	83840002	Promoter	LOC102724163,HSBP1
chr16	85169856	85170056	Promoter	LOC400548
chr16	87530133	87530333	Promoter	ZCCHC14
chr16	87814047	87814247	Promoter	LOC102724467
chr16	87814078	87814278	Promoter	LOC102724467
chr16	87981850	87982050	Promoter	BANP
chr16	88717889	88718089	Promoter	CYBA
chr16	88770458	88770658	Promoter	RNF166,CTU2
chr16	88770902	88771102	Promoter	RNF166,CTU2
chr16	88770944	88771144	Promoter	RNF166,CTU2
chr16	89382791	89382991	Promoter	LOC100287036
chr17	1626409	1626609	Promoter	WDR81
chr17	1626475	1626675	Promoter	WDR81
chr17	1737737	1737937	Promoter	SMYD4
chr17	1959496	1959696	Promoter	HIC1
chr17	1992776	1992976	Promoter	SMG6
chr17	1992991	1993191	Promoter	SMG6
chr17	2169402	2169602	Promoter	SMG6
chr17	2169422	2169622	Promoter	SMG6
chr17	2169471	2169671	Promoter	SMG6
chr17	2169493	2169693	Promoter	SMG6
chr17	2169752	2169952	Promoter	SMG6
chr17	4336982	4337182	Promoter	SPNS3
chr17	4336994	4337194	Promoter	SPNS3
chr17	4337131	4337331	Promoter	SPNS3
chr17	4549027	4549227	Promoter	ALOX15
chr17	4639645	4639845	Promoter	ZMYND15
chr17	5140804	5141004	Promoter	SCIMP
chr17	6919053	6919253	Promoter	ALOX12-AS1
chr17	7169626	7169826	Promoter	CLDN7
chr17	7240123	7240323	Promoter	ACAP1
chr17	7905601	7905801	Promoter	GUCY2D
chr17	7905604	7905804	Promoter	GUCY2D
chr17	8772094	8772294	Promoter	PIK3R6
chr17	13506130	13506330	Promoter	HS3ST3A1
chr17	19209789	19209989	Promoter	EPN2-AS1
chr17	21029195	21029395	Promoter	DHRS7B
chr17	27253038	27253238	Promoter	LOC101927018
chr17	27253174	27253374	Promoter	LOC101927018
chr17	27369680	27369880	Promoter	PIPOX
chr17	29641065	29641265	Promoter	EVI2B
chr17	29648366	29648566	Promoter	EVI2A
chr17	29648446	29648646	Promoter	EVI2A
chr17	29648711	29648911	Promoter	EVI2A
chr17	33417013	33417213	Promoter	RFFL
chr17	34207232	34207432	Promoter	CCL5
chr17	34207381	34207581	Promoter	CCL5
chr17	34207563	34207763	Promoter	CCL5
chr17	34345036	34345236	Promoter	CCL23
chr17	34345072	34345272	Promoter	CCL23
chr17	34417430	34417630	Promoter	CCL3
chr17	36244247	36244447	Promoter	YWHAEP7
chr17	37561001	37561201	Promoter	FBXL20
chr17	37934278	37934478	Promoter	IKZF3
chr17	37937239	37937439	Promoter	IKZF3
chr17	38717142	38717342	Promoter	CCR7
chr17	38717175	38717375	Promoter	CCR7
chr17	38718129	38718329	Promoter	CCR7
chr17	38721788	38721988	Promoter	CCR7
chr17	38721842	38722042	Promoter	CCR7
chr17	39143880	39144080	Promoter	KRT40
chr17	39421209	39421409	Promoter	KRTAP9-6
chr17	39421232	39421432	Promoter	KRTAP9-6
chr17	39597880	39598080	Promoter	KRT38
chr17	39648805	39649005	Promoter	KRT36
chr17	39684725	39684925	Promoter	KRT19
chr17	39866980	39867180	Promoter	GAST
chr17	39867046	39867246	Promoter	GAST
chr17	40545051	40545251	Promoter	STAT3
chr17	44272050	44272250	Promoter	KANSL1
chr17	45270116	45270316	Promoter	CDC27
chr17	46517541	46517741	Promoter	LOC101927166
chr17	46518847	46519047	Promoter	LOC101927166
chr17	46625786	46625986	Promoter	HOXB2
chr17	47287123	47287323	Promoter	GNGT2,ABI3
chr17	47287392	47287592	Promoter	GNGT2,ABI3
chr17	47287421	47287621	Promoter	GNGT2,ABI3
chr17	47287426	47287626	Promoter	GNGT2,ABI3
chr17	47288449	47288649	Promoter	GNGT2
chr17	48042035	48042235	Promoter	DLX4
chr17	48042253	48042453	Promoter	DLX4
chr17	48042505	48042705	Promoter	DLX4
chr17	48042679	48042879	Promoter	DLX4
chr17	48042963	48043163	Promoter	DLX4
chr17	48043460	48043660	Promoter	DLX4
chr17	48043496	48043696	Promoter	DLX4
chr17	48049852	48050052	Promoter	DLX4
chr17	48049870	48050070	Promoter	DLX4
chr17	48049879	48050079	Promoter	DLX4
chr17	48049979	48050179	Promoter	DLX4
chr17	48050174	48050374	Promoter	DLX4
chr17	48279165	48279365	Promoter	COL1A1
chr17	48290359	48290559	Promoter	LOC101927230
chr17	48948778	48948978	Promoter	TOB1
chr17	51899615	51899815	Promoter	KIF2B
chr17	55054710	55054910	Promoter	SCPEP1
chr17	56359427	56359627	Promoter	MPO
chr17	56405848	56406048	Promoter	BZRAP1-AS1,BZRAP1
chr17	56405867	56406067	Promoter	BZRAP1-AS1,BZRAP1
chr17	56406992	56407192	Promoter	BZRAP1-AS1,BZRAP1
chr17	56407047	56407247	Promoter	BZRAP1-AS1,BZRAP1
chr17	56408097	56408297	Promoter	BZRAP1,MIR142
chr17	56408588	56408788	Promoter	BZRAP1,MIR142
chr17	56408594	56408794	Promoter	BZRAP1,MIR142
chr17	56408928	56409128	Promoter	BZRAP1,MIR142
chr17	56409434	56409634	Promoter	BZRAP1,MIR142
chr17	57439929	57440129	Promoter	MIR4729
chr17	58183843	58184043	Promoter	LOC653653
chr17	59485679	59485879	Promoter	C17orf82
chr17	59532464	59532664	Promoter	TBX4
chr17	59532981	59533181	Promoter	TBX4
chr17	62009507	62009707	Promoter	CD79B
chr17	62009551	62009751	Promoter	CD79B
chr17	66255566	66255766	Promoter	ARSG
chr17	72458806	72459006	Promoter	CD300A
chr17	72459571	72459771	Promoter	CD300A
chr17	72528556	72528756	Promoter	CD300LB
chr17	72576022	72576222	Promoter	C17orf77
chr17	72588312	72588512	Promoter	CD300LD
chr17	72588325	72588525	Promoter	CD300LD
chr17	72619727	72619927	Promoter	CD300E
chr17	72619862	72620062	Promoter	CD300E
chr17	72619922	72620122	Promoter	CD300E
chr17	72619988	72620188	Promoter	CD300E
chr17	72709472	72709672	Promoter	CD300LF
chr17	72776138	72776338	Promoter	NAT9
chr17	73514415	73514615	Promoter	CASKIN2
chr17	73583845	73584045	Promoter	MYO15B
chr17	73583929	73584129	Promoter	MYO15B
chr17	74141914	74142114	Promoter	FOXJ1
chr17	74500235	74500435	Promoter	RHBDF2
chr17	74523515	74523715	Promoter	PRCD
chr17	74523764	74523964	Promoter	PRCD
chr17	75178414	75178614	Promoter	SEC14L1
chr17	75401053	75401253	Promoter	2009-09-01
chr17	75401099	75401299	Promoter	2009-09-01
chr17	76125932	76126132	Promoter	TMC8,TMC6
chr17	76126602	76126802	Promoter	TMC8,TMC6
chr17	76127117	76127317	Promoter	TMC8,TMC6
chr17	76355188	76355388	Promoter	LOC101928674
chr17	76371547	76371747	Promoter	PGS1
chr17	78231389	78231589	Promoter	RNF213
chr17	79624026	79624226	Promoter	PDE6G
chr17	80330801	80331001	Promoter	UTS2R
chr17	80407490	80407690	Promoter	C17orf62
chr17	80407679	80407879	Promoter	C17orf62
chr18	813397	813597	Promoter	YES1
chr18	2657680	2657880	Promoter	CBX3P2
chr18	5892019	5892219	Promoter	TMEM200C
chr18	5892113	5892313	Promoter	TMEM200C
chr18	6510685	6510885	Promoter	LINC01387
chr18	12307530	12307730	Promoter	TUBB6
chr18	12307549	12307749	Promoter	TUBB6
chr18	13609324	13609524	Promoter	MIR4526,LDLRAD4
chr18	28955853	28956053	Promoter	DSG4
chr18	30091135	30091335	Promoter	WBP11P1
chr18	37646075	37646275	Promoter	LINC01477
chr18	46061506	46061706	Promoter	CTIF
chr18	51886183	51886383	Promoter	C18orf54
chr18	52258134	52258334	Promoter	DYNAP
chr18	52258204	52258404	Promoter	DYNAP
chr18	53178321	53178521	Promoter	TCF4
chr18	53259984	53260184	Promoter	TCF4
chr18	56116916	56117116	Promoter	MIR122
chr18	56116952	56117152	Promoter	MIR122
chr18	61441377	61441577	Promoter	SERPINB7
chr18	67625735	67625935	Promoter	CD226
chr18	67951986	67952186	Promoter	SOCS6
chr18	77723126	77723326	Promoter	HSBP1L1
chr19	823741	823941	Promoter	LPPR3,AZU1
chr19	1069002	1069202	Promoter	HMHA1
chr19	1095984	1096184	Promoter	POLR2E
chr19	2094584	2094784	Promoter	IZUMO4
chr19	2095366	2095566	Promoter	IZUMO4
chr19	2095543	2095743	Promoter	IZUMO4
chr19	2281910	2282110	Promoter	C19orf35
chr19	2282107	2282307	Promoter	C19orf35
chr19	3133335	3133535	Promoter	GNA15
chr19	3133626	3133826	Promoter	GNA15
chr19	3178412	3178612	Promoter	S1PR4
chr19	4302341	4302541	Promoter	FSD1,TMIGD2
chr19	4302348	4302548	Promoter	FSD1,TMIGD2
chr19	4302389	4302589	Promoter	FSD1,TMIGD2
chr19	4302479	4302679	Promoter	FSD1,TMIGD2
chr19	6481719	6481919	Promoter	DENND1C
chr19	6481726	6481926	Promoter	DENND1C
chr19	6481845	6482045	Promoter	DENND1C
chr19	6481911	6482111	Promoter	DENND1C
chr19	6481962	6482162	Promoter	DENND1C
chr19	6482069	6482269	Promoter	DENND1C
chr19	6482088	6482288	Promoter	DENND1C
chr19	6482120	6482320	Promoter	DENND1C
chr19	6592454	6592654	Promoter	CD70
chr19	7557142	7557342	Promoter	PEX11G
chr19	7562221	7562421	Promoter	C19orf45
chr19	8116924	8117124	Promoter	CCL25
chr19	8116947	8117147	Promoter	CCL25
chr19	8567402	8567602	Promoter	PRAM1
chr19	8582506	8582706	Promoter	ZNF414
chr19	9093098	9093298	Promoter	MUC16
chr19	10215451	10215651	Promoter	PPAN,PPAN-P2RY11,ANGPTL6,SNORD105,SNORD105B
chr19	10215538	10215738	Promoter	PPAN,PPAN-P2RY11,ANGPTL6,SNORD105,SNORD105B
chr19	10222075	10222275	Promoter	P2RY11
chr19	10397329	10397529	Promoter	ICAM4,ICAM5
chr19	10449842	10450042	Promoter	ICAM3
chr19	10449922	10450122	Promoter	ICAM3
chr19	10538797	10538997	Promoter	PDE4A
chr19	10677734	10677934	Promoter	KRI1
chr19	10978733	10978933	Promoter	CARM1
chr19	11305824	11306024	Promoter	KANK2
chr19	11305911	11306111	Promoter	KANK2
chr19	11497928	11498128	Promoter	EPOR
chr19	13215629	13215829	Promoter	LYL1
chr19	14550746	14550946	Promoter	PKN1
chr19	14550899	14551099	Promoter	PKN1
chr19	14590933	14591133	Promoter	PTGER1
chr19	14785649	14785849	Promoter	EMR3
chr19	16774762	16774962	Promoter	SMIM7
chr19	16999568	16999768	Promoter	F2RL3
chr19	16999597	16999797	Promoter	F2RL3
chr19	17516182	17516382	Promoter	BST2
chr19	17516229	17516429	Promoter	BST2
chr19	17516239	17516439	Promoter	BST2
chr19	17516270	17516470	Promoter	BST2
chr19	17516342	17516542	Promoter	BST2
chr19	17516370	17516570	Promoter	BST2
chr19	17516612	17516812	Promoter	BST2
chr19	17516908	17517108	Promoter	BST2
chr19	17517268	17517468	Promoter	BST2
chr19	17861917	17862117	Promoter	FCHO1
chr19	17862004	17862204	Promoter	FCHO1
chr19	17862050	17862250	Promoter	FCHO1
chr19	17958856	17959056	Promoter	JAK3
chr19	17958946	17959146	Promoter	JAK3
chr19	17958982	17959182	Promoter	JAK3
chr19	18197444	18197644	Promoter	IL12RB1
chr19	19778894	19779094	Promoter	ZNF101,ATP13A1
chr19	21264848	21265048	Promoter	ZNF714
chr19	21264899	21265099	Promoter	ZNF714
chr19	21265164	21265364	Promoter	ZNF714
chr19	21265264	21265464	Promoter	ZNF714
chr19	21265321	21265521	Promoter	ZNF714
chr19	21324749	21324949	Promoter	ZNF431
chr19	33181145	33181345	Promoter	NUDT19
chr19	35488396	35488596	Promoter	GRAMD1A
chr19	36101091	36101291	Promoter	HAUS5
chr19	36203732	36203932	Promoter	ZBTB32
chr19	36233224	36233424	Promoter	PSENEN,IGFLR1
chr19	36233595	36233795	Promoter	PSENEN,IGFLR1
chr19	39468729	39468929	Promoter	FBXO17
chr19	39826593	39826793	Promoter	GMFG
chr19	39826721	39826921	Promoter	GMFG
chr19	39826823	39827023	Promoter	GMFG
chr19	39826827	39827027	Promoter	GMFG
chr19	40191290	40191490	Promoter	LGALS14
chr19	42636525	42636725	Promoter	LOC100505622,POU2F2
chr19	42636702	42636902	Promoter	LOC100505622,POU2F2
chr19	43856494	43856694	Promoter	CD177
chr19	45428824	45429024	Promoter	APOC1P1
chr19	45738757	45738957	Promoter	EXOC3L2
chr19	46732251	46732451	Promoter	IGFL1
chr19	48752890	48753090	Promoter	CARD8
chr19	48752901	48753101	Promoter	CARD8
chr19	48753040	48753240	Promoter	CARD8
chr19	48761820	48762020	Promoter	CARD8
chr19	49837111	49837311	Promoter	CD37
chr19	49838378	49838578	Promoter	CD37
chr19	49838677	49838877	Promoter	CD37
chr19	50015078	50015278	Promoter	FCGRT
chr19	50848147	50848347	Promoter	NAPSB
chr19	51626712	51626912	Promoter	SIGLEC9
chr19	51626886	51627086	Promoter	SIGLEC9
chr19	51670215	51670415	Promoter	SIGLEC17P
chr19	51670323	51670523	Promoter	SIGLEC17P
chr19	51670332	51670532	Promoter	SIGLEC17P
chr19	51670435	51670635	Promoter	SIGLEC17P
chr19	51879106	51879306	Promoter	NKG7
chr19	51898627	51898827	Promoter	C19orf84
chr19	52004892	52005092	Promoter	SIGLEC12
chr19	52005008	52005208	Promoter	SIGLEC12
chr19	52005076	52005276	Promoter	SIGLEC12
chr19	54327577	54327777	Promoter	NLRP12
chr19	54568343	54568543	Promoter	VSTM1
chr19	54784805	54785005	Promoter	MIR4752,LILRB2
chr19	54882076	54882276	Promoter	LAIR1
chr19	54882195	54882395	Promoter	LAIR1
chr19	54882201	54882401	Promoter	LAIR1
chr19	55043745	55043945	Promoter	KIR3DX1
chr19	55105025	55105225	Promoter	LILRA1
chr19	55155073	55155273	Promoter	MIR8061
chr19	55836652	55836852	Promoter	TMEM150B
chr19	55836677	55836877	Promoter	TMEM150B
chr20	1472164	1472364	Promoter	SIRPB2
chr20	1600605	1600805	Promoter	SIRPB1
chr20	1612708	1612908	Promoter	SIRPG-AS1
chr20	1974369	1974569	Promoter	PDYN
chr20	2360285	2360485	Promoter	TGM6
chr20	2360296	2360496	Promoter	TGM6
chr20	3646603	3646803	Promoter	GFRA4
chr20	3796522	3796722	Promoter	AP5S1
chr20	4795819	4796019	Promoter	RASSF2
chr20	11852031	11852231	Promoter	LINC00687
chr20	13972264	13972464	Promoter	SEL1L2,MACROD2
chr20	17943303	17943503	Promoter	SNORD17
chr20	18812550	18812750	Promoter	C20orf78
chr20	23066899	23067099	Promoter	CD93
chr20	23067059	23067259	Promoter	CD93
chr20	23621863	23622063	Promoter	CST3
chr20	30130181	30130381	Promoter	MCTS2P
chr20	31334225	31334425	Promoter	COMMD7
chr20	31366309	31366509	Promoter	DNMT3B
chr20	32278026	32278226	Promoter	E2F1
chr20	35274181	35274381	Promoter	SLA2
chr20	35274470	35274670	Promoter	SLA2
chr20	35274527	35274727	Promoter	SLA2
chr20	35274539	35274739	Promoter	SLA2
chr20	35274552	35274752	Promoter	SLA2
chr20	35274555	35274755	Promoter	SLA2
chr20	35274615	35274815	Promoter	SLA2
chr20	37433645	37433845	Promoter	PPP1R16B
chr20	37433703	37433903	Promoter	PPP1R16B
chr20	37433836	37434036	Promoter	PPP1R16B
chr20	39319440	39319640	Promoter	MAFB
chr20	39767390	39767590	Promoter	PLCG1-AS1
chr20	43209682	43209882	Promoter	PKIG
chr20	43596360	43596560	Promoter	STK4-AS1
chr20	43752949	43753149	Promoter	WFDC12
chr20	43834480	43834680	Promoter	SEMG1
chr20	44145559	44145759	Promoter	SPINT3
chr20	44176157	44176357	Promoter	EPPIN,EPPIN-WFDC6
chr20	44649250	44649450	Promoter	SLC12A5
chr20	45181683	45181883	Promoter	OCSTAMP
chr20	49311775	49311975	Promoter	FAM65C
chr20	54986976	54987176	Promoter	CASS4
chr20	54987040	54987240	Promoter	CASS4
chr20	54987155	54987355	Promoter	CASS4
chr20	54987170	54987370	Promoter	CASS4
chr20	54987230	54987430	Promoter	CASS4
chr20	55841971	55842171	Promoter	BMP7
chr20	56134688	56134888	Promoter	PCK1
chr20	56195358	56195558	Promoter	ZBP1
chr20	56196188	56196388	Promoter	ZBP1
chr20	57412845	57413045	Promoter	GNAS
chr20	58630679	58630879	Promoter	C20orf197
chr20	58630854	58631054	Promoter	C20orf197
chr20	60074140	60074340	Promoter	CDH4
chr20	62199056	62199256	Promoter	HELZ2
chr20	62199081	62199281	Promoter	HELZ2
[truncated: 92 more rows]

## Sheet:  hypo enhancer plaque
chr1:2187662-2187862	Enhancer	GNB1; >>	Keratinocyte; >>
chr1:84831493-84831693	Enhancer	RP11; >>	HUVEC; >>
chr1:204561517-204561717	Enhancer	RP11; >>	Keratinocyte; >>
chr1:209943031-209943231	Enhancer	RP11; >>	Keratinocyte; >>

## Sheet: hypo promoter plaque
chr1:11537877-11538077	Promoter	PTCHD2
chr1:11710510-11710710	Promoter	FBXO44
chr1:38412611-38412811	Promoter	INPP5B
chr1:38412644-38412844	Promoter	INPP5B
chr1:109395157-109395357	Promoter	SPATA42
chr1:151693122-151693322	Promoter	CELF3,RIIAD1

## Sheet: list hypo promoter plaque
PTCHD2
FBXO44
INPP5B
SPATA42
CELF3
RIIAD1

## Sheet: hypo enhancers genes nodule
chr1	2187357	2187557	Enhancer	GNB1;PRKCZ;RP11;RP11;C1orf86;AL590822.1;SKI;RP4;RER1;PEX10;PLCH2;RP3;RP3;PANK4;TNFRSF14;FAM213B;MMEL1	Keratinocyte;Keratinocyte;Keratinocyte;Keratinocyte;Keratinocyte;Keratinocyte;Keratinocyte;Keratinocyte;Keratinocyte;Keratinocyte;Keratinocyte;Keratinocyte;Keratinocyte;Keratinocyte;Keratinocyte;Keratinocyte;Keratinocyte
chr1	2187662	2187862	Enhancer	GNB1;PRKCZ;RP11;RP11;C1orf86;AL590822.1;SKI;RP4;RER1;PEX10;PLCH2;RP3;RP3;PANK4;TNFRSF14;FAM213B;MMEL1	Keratinocyte;Keratinocyte;Keratinocyte;Keratinocyte;Keratinocyte;Keratinocyte;Keratinocyte;Keratinocyte;Keratinocyte;Keratinocyte;Keratinocyte;Keratinocyte;Keratinocyte;Keratinocyte;Keratinocyte;Keratinocyte;Keratinocyte
chr1	6088307	6088507	Enhancer	KCNAB2;ACOT7;HES2;ESPN;RP1	Keratinocyte;Keratinocyte;Keratinocyte;Keratinocyte;Keratinocyte
chr1	7168303	7168503	Enhancer	DNAJC11	Keratinocyte
chr1	15575618	15575818	Enhancer	C1orf126;TMEM51;C1orf195;RP1;FHAD1;DNAJC16;CHCHD2P6;DDI2;RSC1A1;PLEKHM2	Keratinocyte;Keratinocyte;Keratinocyte;Keratinocyte;Keratinocyte;Keratinocyte;Keratinocyte;Keratinocyte;Keratinocyte;Keratinocyte
chr1	25554414	25554614	Enhancer	SYF2;RP3;RHD;SDHDP6;RP11;TMEM50A;C1orf63;SDHDP1;TMEM57	HUVEC;HUVEC;HUVEC;HUVEC;HUVEC;HUVEC;HUVEC;HUVEC;HUVEC
chr1	31118763	31118963	Enhancer	PUM1;ZCCHC17	Keratinocyte;Keratinocyte
chr1	31229022	31229222	Enhancer	RP5;MATN1;LAPTM5;RP11;ZCCHC17;SERINC2	Keratinocyte;Keratinocyte;Keratinocyte;Keratinocyte;Keratinocyte;Keratinocyte
chr1	31263694	31263894	Enhancer	ZCCHC17;SERINC2	Keratinocyte;Keratinocyte
chr1	39428163	39428363	Enhancer	RP11;RRAGC;RP5;MYCBP;RHBDL2;AKIRIN1;NDUFS5;MACF1;RP11;RP11;KIAA0754;PABPC4	Keratinocyte;Keratinocyte;Keratinocyte;Keratinocyte;Keratinocyte;Keratinocyte;Keratinocyte;Keratinocyte;Keratinocyte;Keratinocyte;Keratinocyte;Keratinocyte
chr1	40525069	40525269	Enhancer	Y;TRIT1;RP1;MYCL1;CAP1;PPT1;RP11;RLF;TMCO2;RP1;ZMPSTE24;RP1	HUVEC;HUVEC;HUVEC;HUVEC;HUVEC;HUVEC;HUVEC;HUVEC;HUVEC;HUVEC;HUVEC;HUVEC
chr1	40735975	40736175	Enhancer	Y;TRIT1;MFSD2A;RP3;CAP1;PPT1;RP11;TMCO2;RP1;ZMPSTE24;RP1;COL9A2;RP1;SMAP2;RP1;ZNF643;RP1;ZNF642;ZNF684	HUVEC;HUVEC;HUVEC;HUVEC;HUVEC;HUVEC;HUVEC;HUVEC;HUVEC;HUVEC;HUVEC;HUVEC;HUVEC;HUVEC;HUVEC;HUVEC;HUVEC;HUVEC;HUVEC
chr1	82168646	82168846	Enhancer	LPHN2;RP5;RP5;ST13P20	Keratinocyte;Keratinocyte;Keratinocyte;Keratinocyte
chr1	82169215	82169415	Enhancer	LPHN2;RP5;RP5;ST13P20	Keratinocyte;Keratinocyte;Keratinocyte;Keratinocyte
chr1	84831493	84831693	Enhancer	RP11;RP11;UOX;RPF1;SPATA1;GNG5;CTBS	HUVEC;HUVEC;HUVEC;HUVEC;HUVEC;HUVEC;HUVEC
chr1	90321353	90321553	Enhancer	RP11;RP5;LRRC8C;RP5;LRRC8D;ZNF326;GEMIN8P4	Keratinocyte;Keratinocyte;Keratinocyte;Keratinocyte;Keratinocyte;Keratinocyte;Keratinocyte
chr1	112942187	112942387	Enhancer	RP5;RP5;CTTNBP2NL;RP4;WNT2B;CAPZA1;ST7L;MRPL53P1;MOV10;RP11;RHOC;PPM1J;RP11;SLC16A1	Keratinocyte;Keratinocyte;Keratinocyte;Keratinocyte;Keratinocyte;Keratinocyte;Keratinocyte;Keratinocyte;Keratinocyte;Keratinocyte;Keratinocyte;Keratinocyte;Keratinocyte;Keratinocyte
chr1	150971653	150971853	Enhancer	SNORA40;ENSA;GOLPH3L;UBE2D3P3;CTSK;ARNT;RP11;RP11;SETDB1;RP11;RP11;CERS2;ANXA9;FAM63A;PRUNE;BNIPL;C1orf56;MLLT11;CDC42SE1;RP11;GABPB2;RP11;SEMA6C;TNFAIP8L2;LYSMD1;SCNM1;TMOD4;VPS72;PIP5K1A;PSMD4;ZNF687;RP11;PI4KB;RP11;RP11;RFX5;SELENBP1;PSMB4	HUVEC;HUVEC;HUVEC;HUVEC;HUVEC;HUVEC;HUVEC;HUVEC;HUVEC;HUVEC;HUVEC;HUVEC;HUVEC;HUVEC;HUVEC;HUVEC;HUVEC;HUVEC;HUVEC;HUVEC;HUVEC;HUVEC;HUVEC;HUVEC;HUVEC;HUVEC;HUVEC;HUVEC;HUVEC;HUVEC;HUVEC;HUVEC;HUVEC;HUVEC;HUVEC;HUVEC;HUVEC;HUVEC
chr1	150971789	150971989	Enhancer	SNORA40;ENSA;GOLPH3L;UBE2D3P3;CTSK;ARNT;RP11;RP11;SETDB1;RP11;RP11;CERS2;ANXA9;FAM63A;PRUNE;BNIPL;C1orf56;MLLT11;CDC42SE1;RP11;GABPB2;RP11;SEMA6C;TNFAIP8L2;LYSMD1;SCNM1;TMOD4;VPS72;PIP5K1A;PSMD4;ZNF687;RP11;PI4KB;RP11;RP11;RFX5;SELENBP1;PSMB4	HUVEC;HUVEC;HUVEC;HUVEC;HUVEC;HUVEC;HUVEC;HUVEC;HUVEC;HUVEC;HUVEC;HUVEC;HUVEC;HUVEC;HUVEC;HUVEC;HUVEC;HUVEC;HUVEC;HUVEC;HUVEC;HUVEC;HUVEC;HUVEC;HUVEC;HUVEC;HUVEC;HUVEC;HUVEC;HUVEC;HUVEC;HUVEC;HUVEC;HUVEC;HUVEC;HUVEC;HUVEC;HUVEC
chr1	151072326	151072526	Enhancer	ARNT;SETDB1;RP11;CERS2;FAM63A;PRUNE;BNIPL;C1orf56;MLLT11;CDC42SE1;RP11;GABPB2;SEMA6C;TMOD4;VPS72;PIP5K1A;PSMD4;ZNF687;RP11;PI4KB;RP11;RP11;RFX5;SELENBP1;PSMB4;POGZ	HUVEC;HUVEC;HUVEC;HUVEC;HUVEC;HUVEC;HUVEC;HUVEC;HUVEC;HUVEC;HUVEC;HUVEC;HUVEC;HUVEC;HUVEC;HUVEC;HUVEC;HUVEC;HUVEC;HUVEC;HUVEC;HUVEC;HUVEC;HUVEC;HUVEC;HUVEC
chr1	151129744	151129944	Enhancer	ARNT;SETDB1;RP11;CERS2;ANXA9;FAM63A;PRUNE;C1orf56;MLLT11;CDC42SE1;RP11;GABPB2;RP11;TNFAIP8L2;SCNM1;TMOD4;VPS72;PIP5K1A;PSMD4;ZNF687;RP11;PI4KB;RP11;RP11;RFX5;SELENBP1;PSMB4;POGZ;S100A11	HUVEC;HUVEC;HUVEC;HUVEC;HUVEC;HUVEC;HUVEC;HUVEC;HUVEC;HUVEC;HUVEC;HUVEC;HUVEC;HUVEC;HUVEC;HUVEC;HUVEC;HUVEC;HUVEC;HUVEC;HUVEC;HUVEC;HUVEC;HUVEC;HUVEC;HUVEC;HUVEC;HUVEC;HUVEC
chr1	153358824	153359024	Enhancer	IVL;SPRR4;SPRR1A;SPRR3;SPRR1B;SPRR2D;SPRR2A;SPRR2E;SPRR2B;SPRR2G;PRR9;RP1;PGLYRP3;PGLYRP4;S100A9;S100A12;AL591704.5;S100A8;S100A7A;S100A6;S100A5;S100A3;S100A4;S100A2;S100A16;S100A14;S100A1;CHTOP;S100A13;SNAPIN;ILF2;RP11;INTS3;RP11;RP11;SLC27A3;RP11;CRTC2;CREB3L4;SLC39A1;RPS27;RP11	Keratinocyte;Keratinocyte;Keratinocyte;Keratinocyte;Keratinocyte;Keratinocyte;Keratinocyte;Keratinocyte;Keratinocyte;Keratinocyte;Keratinocyte;Keratinocyte;Keratinocyte;Keratinocyte;Keratinocyte;Keratinocyte;Keratinocyte;Keratinocyte;Keratinocyte;Keratinocyte;Keratinocyte;Keratinocyte;Keratinocyte;Keratinocyte;Keratinocyte;Keratinocyte;Keratinocyte;Keratinocyte;Keratinocyte;Keratinocyte;Keratinoc…
chr1	156127427	156127627	Enhancer	DAP3;RP11;GON4L;SYT11;RIT1;SCARNA4;KIAA0907;RP11;ARHGEF2;SSR2;UBQLN4;LAMTOR2;RAB25;AL355388.1;MEX3A;LMNA;SEMA4A;SLC25A44;RP11;PMF1;BGLAP;PAQR6;SMG5;TMEM79;C1orf85;VHLL;C1orf182;CCT3;RHBG;Y;MEF2D;IQGAP3;APOA1BP;GPATCH4;NES;ISG20L2;MRPL24;PRCC;HDGF;PEAR1	HUVEC;HUVEC;HUVEC;HUVEC;HUVEC;HUVEC;HUVEC;HUVEC;HUVEC;HUVEC;HUVEC;HUVEC;HUVEC;HUVEC;HUVEC;HUVEC;HUVEC;HUVEC;HUVEC;HUVEC;HUVEC;HUVEC;HUVEC;HUVEC;HUVEC;HUVEC;HUVEC;HUVEC;HUVEC;HUVEC;HUVEC;HUVEC;HUVEC;HUVEC;HUVEC;HUVEC;HUVEC;HUVEC;HUVEC;HUVEC
chr1	167586838	167587038	Enhancer	POU2F1;MPZL1;RP1;RP1;DCAF6;BRP44;RP4	Keratinocyte;Keratinocyte;Keratinocyte;Keratinocyte;Keratinocyte;Keratinocyte;Keratinocyte
chr1	167607132	167607332	Enhancer	RP1;RP1;RP4	Keratinocyte;Keratinocyte;Keratinocyte
chr1	170635022	170635222	Enhancer	PRRX1	Keratinocyte
chr1	172668486	172668686	Enhancer	PIGC;C1orf9	Keratinocyte;Keratinocyte
chr1	184861011	184861211	Enhancer	C1orf21;FAM129A;RNF2;CTA;RP4	Keratinocyte;Keratinocyte;Keratinocyte;Keratinocyte;Keratinocyte
chr1	186062673	186062873	Enhancer	GS1;PRG4;TPR;C1orf27;OCLM	HUVEC;HUVEC;HUVEC;HUVEC;HUVEC
chr1	186708160	186708360	Enhancer	TPR;C1orf27;OCLM	Keratinocyte;Keratinocyte;Keratinocyte
chr1	204433959	204434159	Enhancer	SNRPE;SOX13;RP11;PLEKHA6;RP11;RP11;PPP1R15B	HUVEC;HUVEC;HUVEC;HUVEC;HUVEC;HUVEC;HUVEC
chr1	204695116	204695316	Enhancer	RP11	Keratinocyte
chr1	209897514	209897714	Enhancer	RP11;ATP5G2P1;RP11;MIR205HG;RP1;CAMK1G;G0S2;HSD11B1;TRAF3IP3;C1orf74;RP3;IRF6;DIEXF;SYT14	Keratinocyte;Keratinocyte;Keratinocyte;Keratinocyte;Keratinocyte;Keratinocyte;Keratinocyte;Keratinocyte;Keratinocyte;Keratinocyte;Keratinocyte;Keratinocyte;Keratinocyte;Keratinocyte
chr1	209897558	209897758	Enhancer	RP11;ATP5G2P1;RP11;MIR205HG;RP1;CAMK1G;G0S2;HSD11B1;TRAF3IP3;C1orf74;RP3;IRF6;DIEXF;SYT14	Keratinocyte;Keratinocyte;Keratinocyte;Keratinocyte;Keratinocyte;Keratinocyte;Keratinocyte;Keratinocyte;Keratinocyte;Keratinocyte;Keratinocyte;Keratinocyte;Keratinocyte;Keratinocyte
chr1	209897737	209897937	Enhancer	RP11;ATP5G2P1;RP11;MIR205HG;RP1;CAMK1G;G0S2;HSD11B1;TRAF3IP3;C1orf74;RP3;IRF6;DIEXF;SYT14	Keratinocyte;Keratinocyte;Keratinocyte;Keratinocyte;Keratinocyte;Keratinocyte;Keratinocyte;Keratinocyte;Keratinocyte;Keratinocyte;Keratinocyte;Keratinocyte;Keratinocyte;Keratinocyte
chr1	209943031	209943231	Enhancer	RP11;ATP5G2P1;MIR205HG;RP1;CAMK1G;G0S2;ADORA2BP;TRAF3IP3;C1orf74;RP3;IRF6;DIEXF;SYT14	Keratinocyte;Keratinocyte;Keratinocyte;Keratinocyte;Keratinocyte;Keratinocyte;Keratinocyte;Keratinocyte;Keratinocyte;Keratinocyte;Keratinocyte;Keratinocyte;Keratinocyte
chr1	214577621	214577821	Enhancer	SMYD2;RP11;RP11;KRT18P12;PTPN14;CENPF;FAM108A4P	Keratinocyte;Keratinocyte;Keratinocyte;Keratinocyte;Keratinocyte;Keratinocyte;Keratinocyte
chr1	215130854	215131054	Enhancer	RP11;CENPF	Keratinocyte;Keratinocyte
chr1	218880429	218880629	Enhancer	RRP15;RP11	Keratinocyte;Keratinocyte
chr1	220310770	220310970	Enhancer	snoU13;EPRS;BPNT1;IARS2;MIR215;RP11	HUVEC;HUVEC;HUVEC;HUVEC;HUVEC;HUVEC
chr1	224023197	224023397	Enhancer	SNRPEP10;CAPN8;CAPN2;TP53BP2;PHBP11;ACTBP11;CICP5;RP11;RP11;RP11;RP11;FBXO28;RP11;DEGS1;CNIH4	Keratinocyte;Keratinocyte;Keratinocyte;Keratinocyte;Keratinocyte;Keratinocyte;Keratinocyte;Keratinocyte;Keratinocyte;Keratinocyte;Keratinocyte;Keratinocyte;Keratinocyte;Keratinocyte;Keratinocyte
chr1	224023440	224023640	Enhancer	SNRPEP10;CAPN8;CAPN2;TP53BP2;PHBP11;ACTBP11;CICP5;RP11;RP11;RP11;RP11;FBXO28;RP11;DEGS1;CNIH4	Keratinocyte;Keratinocyte;Keratinocyte;Keratinocyte;Keratinocyte;Keratinocyte;Keratinocyte;Keratinocyte;Keratinocyte;Keratinocyte;Keratinocyte;Keratinocyte;Keratinocyte;Keratinocyte;Keratinocyte
chr1	230259488	230259688	Enhancer	GALNT2+E:E+A:C+G11	Keratinocyte
chr1	234867200	234867400	Enhancer	RP5;C1orf31;IRF2BP2;RP4;RP4;RP4;RBM34	Keratinocyte;Keratinocyte;Keratinocyte;Keratinocyte;Keratinocyte;Keratinocyte;Keratinocyte
chr2	9427937	9428137	Enhancer	KIDINS220;MBOAT2;ASAP2;RP11;ITGB1BP1;CPSF3;IAH1;ADAM17;YWHAQ	Keratinocyte;Keratinocyte;Keratinocyte;Keratinocyte;Keratinocyte;Keratinocyte;Keratinocyte;Keratinocyte;Keratinocyte
chr2	9428564	9428764	Enhancer	KIDINS220;MBOAT2;ASAP2;RP11;ITGB1BP1;CPSF3;IAH1;ADAM17;YWHAQ	Keratinocyte;Keratinocyte;Keratinocyte;Keratinocyte;Keratinocyte;Keratinocyte;Keratinocyte;Keratinocyte;Keratinocyte
chr2	9518224	9518424	Enhancer	ASAP2;RP11;ITGB1BP1;CPSF3;IAH1;RP11;ADAM17;YWHAQ	HUVEC;HUVEC;HUVEC;HUVEC;HUVEC;HUVEC;HUVEC;HUVEC
chr2	10237442	10237642	Enhancer	IAH1;YWHAQ;TAF1B;GRHL1	Keratinocyte;Keratinocyte;Keratinocyte;Keratinocyte
chr2	16835058	16835258	Enhancer	FAM49A	Keratinocyte
chr2	37938540	37938740	Enhancer	AC007390.5;QPCT;CDC42EP3;AC010878.3	Keratinocyte;Keratinocyte;Keratinocyte;Keratinocyte
chr2	54823511	54823711	Enhancer	SPTBN1;AC092839.1;AC093110.3;EML6;RTN4;RPS27A	Keratinocyte;Keratinocyte;Keratinocyte;Keratinocyte;Keratinocyte;Keratinocyte
chr2	54823668	54823868	Enhancer	SPTBN1;AC092839.1;AC093110.3;EML6;RTN4;RPS27A	Keratinocyte;Keratinocyte;Keratinocyte;Keratinocyte;Keratinocyte;Keratinocyte
chr2	65459246	65459446	Enhancer	SLC1A4;CEP68;RAB1A;AC007318.5;ACTR2;SPRED2;AC007389.4	Keratinocyte;Keratinocyte;Keratinocyte;Keratinocyte;Keratinocyte;Keratinocyte;Keratinocyte
chr2	65459905	65460105	Enhancer	SLC1A4;CEP68;RAB1A;AC007318.5;ACTR2;SPRED2;AC007389.4	Keratinocyte;Keratinocyte;Keratinocyte;Keratinocyte;Keratinocyte;Keratinocyte;Keratinocyte
chr2	69023442	69023642	Enhancer	PROKR1;ARHGAP25;GKN1;ANTXR1	Keratinocyte;Keratinocyte;Keratinocyte;Keratinocyte
chr2	70161465	70161665	Enhancer	RP11;AC092431.2;AC092431.1;AAK1;ANXA4;GMCL1;SNRNP27;MXD1;ASPRV1;PCBP1;PCBP1;AC016700.4;AC016700.3;C2orf42;TIA1;PCYOX1;SNRPG;AC022201.5;FAM136A	Keratinocyte;Keratinocyte;Keratinocyte;Keratinocyte;Keratinocyte;Keratinocyte;Keratinocyte;Keratinocyte;Keratinocyte;Keratinocyte;Keratinocyte;Keratinocyte;Keratinocyte;Keratinocyte;Keratinocyte;Keratinocyte;Keratinocyte;Keratinocyte;Keratinocyte
chr2	85121986	85122186	Enhancer	TMSB10;C2orf89;AC022210.2;KCMF1;RP11;AC011236.7;TCF7L1;AC093162.5;TGOLN2;ELMOD3;RETSAT;CAPG;MAT2A	Keratinocyte;Keratinocyte;Keratinocyte;Keratinocyte;Keratinocyte;Keratinocyte;Keratinocyte;Keratinocyte;Keratinocyte;Keratinocyte;Keratinocyte;Keratinocyte;Keratinocyte
chr2	97204301	97204501	Enhancer	NEURL3;ARID5A	Keratinocyte;Keratinocyte
chr2	102517022	102517222	Enhancer	C2orf29;AC092570.4;MAP4K4;AC005035.1	Keratinocyte;Keratinocyte;Keratinocyte;Keratinocyte
chr2	102717338	102717538	Enhancer	MAP4K4;AC005035.1;IL1R2;IL1R1;IL1RL2	Keratinocyte;Keratinocyte;Keratinocyte;Keratinocyte;Keratinocyte
chr2	102875272	102875472	Enhancer	MAP4K4;AC005035.1;IL1R2	Keratinocyte;Keratinocyte;Keratinocyte
chr2	102954250	102954450	Enhancer	MAP4K4;IL1R2;IL1RL1;IL18R1	Keratinocyte;Keratinocyte;Keratinocyte;Keratinocyte
chr2	109227383	109227583	Enhancer	GCC2;AC012487.2;LIMS1;AC010095.5;AC010095.7;RANBP2;CCDC138;AC073415.2	Keratinocyte;Keratinocyte;Keratinocyte;Keratinocyte;Keratinocyte;Keratinocyte;Keratinocyte;Keratinocyte
chr2	109257329	109257529	Enhancer	GCC2;AC012487.2;LIMS1;AC010095.5;AC010095.7;RANBP2;CCDC138;AC073415.2	Keratinocyte;Keratinocyte;Keratinocyte;Keratinocyte;Keratinocyte;Keratinocyte;Keratinocyte;Keratinocyte
chr2	114008807	114009007	Enhancer	AC079922.2;SLC20A1;IL1A;IL1B;AC079753.4;AC079753.5;IL36G;HMGN2P23;AC016724.6;IL36RN;IL1F10;IL1RN;PSD4;AC016683.5;AC016683.6;RP11;PAX8;AC016745.2;AC016745.3;CBWD2;WASH2P;RPL23AP7;RABL2A;RP11	Keratinocyte;Keratinocyte;Keratinocyte;Keratinocyte;Keratinocyte;Keratinocyte;Keratinocyte;Keratinocyte;Keratinocyte;Keratinocyte;Keratinocyte;Keratinocyte;Keratinocyte;Keratinocyte;Keratinocyte;Keratinocyte;Keratinocyte;Keratinocyte;Keratinocyte;Keratinocyte;Keratinocyte;Keratinocyte;Keratinocyte;Keratinocyte
chr2	118879712	118879912	Enhancer	DDX18;AC009404.2;INSIG2	Keratinocyte;Keratinocyte;Keratinocyte
chr2	120213076	120213276	Enhancer	DBI;TMEM37	HUVEC;HUVEC
chr2	138775056	138775256	Enhancer	HNMT;AC097523.1;AC097523.2;AC097523.3;AC097721.1	Keratinocyte;Keratinocyte;Keratinocyte;Keratinocyte;Keratinocyte
chr2	160082860	160083060	Enhancer	BTF3L4P2;WDSUB1;AC009506.2;Y;AC009506.1;BAZ2B	HUVEC;HUVEC;HUVEC;HUVEC;HUVEC;HUVEC
chr2	161156121	161156321	Enhancer	PLA2R1;ITGB6;RBMS1	Keratinocyte;Keratinocyte;Keratinocyte
chr2	161189022	161189222	Enhancer	PLA2R1;ITGB6;RBMS1	Keratinocyte;Keratinocyte;Keratinocyte
chr2	161934136	161934336	Enhancer	AC009299.3;PSMD14;AC009299.5;AC009487.6	Keratinocyte;Keratinocyte;Keratinocyte;Keratinocyte
chr2	190309086	190309286	Enhancer	WDR75;ASNSD1	Keratinocyte;Keratinocyte
chr2	191709027	191709227	Enhancer	NAB1;GLS;AC005540.3;AC067945.3;STAT1;MYO1B;AC092614.2	Keratinocyte;Keratinocyte;Keratinocyte;Keratinocyte;Keratinocyte;Keratinocyte;Keratinocyte
chr2	192186313	192186513	Enhancer	GLS;AC005540.3;AC067945.3;STAT1;STAT4;MYO1B;AC092614.2;OBFC2A	Keratinocyte;Keratinocyte;Keratinocyte;Keratinocyte;Keratinocyte;Keratinocyte;Keratinocyte;Keratinocyte
chr2	192710574	192710774	Enhancer	MYO1B;AC098617.2;SDPR;DNAJB1P1	Keratinocyte;Keratinocyte;Keratinocyte;Keratinocyte
chr2	192710923	192711123	Enhancer	MYO1B;AC098617.2;SDPR;DNAJB1P1	Keratinocyte;Keratinocyte;Keratinocyte;Keratinocyte
chr2	196424281	196424481	Enhancer	AC064834.4	Keratinocyte
chr2	202519459	202519659	Enhancer	AC007283.5;STRADB;ALS2CR11;ENO1P4;TMEM237;ALS2;AC007242.3	HUVEC;HUVEC;HUVEC;HUVEC;HUVEC;HUVEC;HUVEC
chr2	206004653	206004853	Enhancer	AC008171.1	HUVEC
chr2	206564386	206564586	Enhancer	NRP2;AC007362.3;AC007362.1	Keratinocyte;Keratinocyte;Keratinocyte
chr2	206565128	206565328	Enhancer	NRP2;AC007362.3;AC007362.1	Keratinocyte;Keratinocyte;Keratinocyte
chr2	208087896	208088096	Enhancer	FASTKD2;KLF7;AC007879.4;AC007879.2;AC007879.7;CREB1;AC007879.5;AC079767.2;METTL21A;PPP1R14BP2	Keratinocyte;Keratinocyte;Keratinocyte;Keratinocyte;Keratinocyte;Keratinocyte;Keratinocyte;Keratinocyte;Keratinocyte;Keratinocyte
chr2	223385921	223386121	Enhancer	SGPP2;FARSB;AC016712.2;ACSL3;ATG12P2;AC097461.4	Keratinocyte;Keratinocyte;Keratinocyte;Keratinocyte;Keratinocyte;Keratinocyte
chr2	224749280	224749480	Enhancer	AP1S3;WDFY1;MRPL44;AC073641.2;SERPINE2	Keratinocyte;Keratinocyte;Keratinocyte;Keratinocyte;Keratinocyte
chr2	224761569	224761769	Enhancer	AP1S3;WDFY1;MRPL44;AC073641.2;SERPINE2	Keratinocyte;Keratinocyte;Keratinocyte;Keratinocyte;Keratinocyte
chr2	227292378	227292578	Enhancer	IRS1;RHBDD1	Keratinocyte;Keratinocyte
chr2	237652269	237652469	Enhancer	CXCR7;COPS8	Keratinocyte;Keratinocyte
chr3	4780405	4780605	Enhancer	SUMF1;EGOT;BHLHE40;ARL8B;EDEM1	Keratinocyte;Keratinocyte;Keratinocyte;Keratinocyte;Keratinocyte
chr3	16553399	16553599	Enhancer	DPH3;OXNAD1;RFTN1	Keratinocyte;Keratinocyte;Keratinocyte
chr3	30654771	30654971	Enhancer	AC116035.1;TGFBR2;AC096921.2;RP11	Keratinocyte;Keratinocyte;Keratinocyte;Keratinocyte
chr3	30654965	30655165	Enhancer	AC116035.1;TGFBR2;AC096921.2;RP11	Keratinocyte;Keratinocyte;Keratinocyte;Keratinocyte
chr3	30699956	30700156	Enhancer	AC116035.1;TGFBR2;AC096921.2;RP11	Keratinocyte;Keratinocyte;Keratinocyte;Keratinocyte
chr3	30700336	30700536	Enhancer	AC116035.1;TGFBR2;AC096921.2;RP11	Keratinocyte;Keratinocyte;Keratinocyte;Keratinocyte
chr3	31052152	31052352	Enhancer	TGFBR2;THRAP3P1	Keratinocyte;Keratinocyte
chr3	31055997	31056197	Enhancer	TGFBR2	Keratinocyte
chr3	32290982	32291182	Enhancer	ZNF860;RPL21P40;RP11;CMTM8;KRT18P15;CMTM7;CMTM6;AC104306.1;DYNC1LI1;IGBP1P3;AC138972.1;CNOT10	Keratinocyte;Keratinocyte;Keratinocyte;Keratinocyte;Keratinocyte;Keratinocyte;Keratinocyte;Keratinocyte;Keratinocyte;Keratinocyte;Keratinocyte;Keratinocyte
chr3	32434239	32434439	Enhancer	ZNF860;OSBPL10;GPD1L;AC097639.8;RP11;CMTM8;KRT18P15;CMTM7;CMTM6;AC104306.1;DYNC1LI1;IGBP1P3;AC138972.1;CNOT10;SUGT1P2;AC139452.2	Keratinocyte;Keratinocyte;Keratinocyte;Keratinocyte;Keratinocyte;Keratinocyte;Keratinocyte;Keratinocyte;Keratinocyte;Keratinocyte;Keratinocyte;Keratinocyte;Keratinocyte;Keratinocyte;Keratinocyte;Keratinocyte
chr3	37095899	37096099	Enhancer	EPM2AIP1;MLH1;AC011816.4;UBE2D3P2;LRRFIP2;GOLGA4	HUVEC;HUVEC;HUVEC;HUVEC;HUVEC;HUVEC
chr3	38648888	38649088	Enhancer	SCN5A	HUVEC
chr3	45160170	45160370	Enhancer	RP11;ZNF502;ZNF501;KIAA1143;TMEM42;EXOSC7;ZDHHC3;CLEC3B;CDCP1;RP11;AC010170.1;TMEM158;LARS2;SACM1L	Keratinocyte;Keratinocyte;Keratinocyte;Keratinocyte;Keratinocyte;Keratinocyte;Keratinocyte;Keratinocyte;Keratinocyte;Keratinocyte;Keratinocyte;Keratinocyte;Keratinocyte;Keratinocyte
chr3	58335632	58335832	Enhancer	SLMAP;PPIAP16;FLNB;FLNB;DNASE1L3;ABHD6;RP11;RPP14;PXK;PDHB	Keratinocyte;Keratinocyte;Keratinocyte;Keratinocyte;Keratinocyte;Keratinocyte;Keratinocyte;Keratinocyte;Keratinocyte;Keratinocyte
chr3	61656197	61656397	Enhancer	RPL10AP6	Keratinocyte
chr3	65605192	65605392	Enhancer	RP11	Keratinocyte
chr3	69417318	69417518	Enhancer	C3orf64;CTD;TMF1;UBA3;ARL6IP5;RP11;RP11;FRMD4B;MITF	Keratinocyte;Keratinocyte;Keratinocyte;Keratinocyte;Keratinocyte;Keratinocyte;Keratinocyte;Keratinocyte;Keratinocyte
chr3	98690440	98690640	Enhancer	RP11;CPOX;RP11;ST3GAL6;RP11;CTD	Keratinocyte;Keratinocyte;Keratinocyte;Keratinocyte;Keratinocyte;Keratinocyte
chr3	99113036	99113236	Enhancer	C3orf26	Keratinocyte
chr3	107704488	107704688	Enhancer	CD47;IFT57	Keratinocyte;Keratinocyte
chr3	111414572	111414772	Enhancer	CD96;RP11;ZBED2;PLCXD2;PLCXD2;PHLDB2;ABHD10;TAGLN3;TMPRSS7;C3orf52;GCET2;RP11	Keratinocyte;Keratinocyte;Keratinocyte;Keratinocyte;Keratinocyte;Keratinocyte;Keratinocyte;Keratinocyte;Keratinocyte;Keratinocyte;Keratinocyte;Keratinocyte
chr3	118903628	118903828	Enhancer	IGSF11;UPK1B;B4GALT4;B4GALT4;ARHGAP31;RPS26P21;TIMMDC1	Keratinocyte;Keratinocyte;Keratinocyte;Keratinocyte;Keratinocyte;Keratinocyte;Keratinocyte
chr3	124829307	124829507	Enhancer	UMPS;HEG1;ZNF148	Keratinocyte;Keratinocyte;Keratinocyte
chr3	127487165	127487365	Enhancer	MCM2;TPRA1;PODXL2;ABTB1;MGLL;SEC61A1;EEFSEC;RUVBL1	Keratinocyte;Keratinocyte;Keratinocyte;Keratinocyte;Keratinocyte;Keratinocyte;Keratinocyte;Keratinocyte
chr3	135702010	135702210	Enhancer	PPP2R3A;RP11;MSL2;RP11;PCCB	Keratinocyte;Keratinocyte;Keratinocyte;Keratinocyte;Keratinocyte
chr3	142164740	142164940	Enhancer	RP11;XRN1;RP11;TRPC1;RP11	Keratinocyte;Keratinocyte;Keratinocyte;Keratinocyte;Keratinocyte
chr3	142569121	142569321	Enhancer	RP11;PLS1;RP11;PCOLCE2;CHST2;PBX2P1	Keratinocyte;Keratinocyte;Keratinocyte;Keratinocyte;Keratinocyte;Keratinocyte
chr3	154688602	154688802	Enhancer	PABPC1P10	Keratinocyte
chr3	159603935	159604135	Enhancer	IQCJ;SCHIP1	Keratinocyte;Keratinocyte
chr3	167742600	167742800	Enhancer	GOLIM4	HUVEC
chr3	169067094	169067294	Enhancer	RP11;RP11	Keratinocyte;Keratinocyte
chr3	184158930	184159130	Enhancer	EEF1A1P8;HSP90AA5P;EIF2B5;RP11;DVL3;AP2M1;ABCF3;FAM131A;POLR2H;EPHB3;MAGEF1;RP11;VPS8	Keratinocyte;Keratinocyte;Keratinocyte;Keratinocyte;Keratinocyte;Keratinocyte;Keratinocyte;Keratinocyte;Keratinocyte;Keratinocyte;Keratinocyte;Keratinocyte;Keratinocyte
chr3	184483765	184483965	Enhancer	HSP90AA5P;EIF2B5;RP11;AP2M1;ALG3;PSMD2;EIF4G1;FAM131A;CLCN2;POLR2H;CHRD;EIF2B5;EPHB3;MAGEF1	Keratinocyte;Keratinocyte;Keratinocyte;Keratinocyte;Keratinocyte;Keratinocyte;Keratinocyte;Keratinocyte;Keratinocyte;Keratinocyte;Keratinocyte;Keratinocyte;Keratinocyte;Keratinocyte
chr3	189742929	189743129	Enhancer	TP63;MTAPP2;LEPREL1;LEPREL1;CLDN1;CLDN16;IL1RAP	Keratinocyte;Keratinocyte;Keratinocyte;Keratinocyte;Keratinocyte;Keratinocyte;Keratinocyte
chr3	193973296	193973496	Enhancer	HES1;ATP13A3	HUVEC;HUVEC
chr3	194210693	194210893	Enhancer	HES1;GP5;AC046143.7;ATP13A3;AC108676.1;AC046143.5;AC046143.3;TMEM44;LSG1	Keratinocyte;Keratinocyte;Keratinocyte;Keratinocyte;Keratinocyte;Keratinocyte;Keratinocyte;Keratinocyte;Keratinocyte
chr3	197215156	197215356	Enhancer	AC011322.1;AC092937.2;DLG1;AC128709.4;AC128709.2;BDH1;AC024560.3;RP11;FYTTD1;KIAA0226;LRCH3;AC144530.1;RPL35A	Keratinocyte;Keratinocyte;Keratinocyte;Keratinocyte;Keratinocyte;Keratinocyte;Keratinocyte;Keratinocyte;Keratinocyte;Keratinocyte;Keratinocyte;Keratinocyte;Keratinocyte
chr4	5039921	5040121	Enhancer	STK32B	Keratinocyte
chr4	13923546	13923746	Enhancer	BOD1L	Keratinocyte
chr4	37839119	37839319	Enhancer	RP11;PGM2;TBC1D1	HUVEC;HUVEC;HUVEC
chr4	40992567	40992767	Enhancer	APBB2;UCHL1	Keratinocyte;Keratinocyte
chr4	40995000	40995200	Enhancer	APBB2;UCHL1	Keratinocyte;Keratinocyte
chr4	71860500	71860700	Enhancer	UTP3;RUFY3;MOB1B;DCK	Keratinocyte;Keratinocyte;Keratinocyte;Keratinocyte
chr4	80928889	80929089	Enhancer	AC097711.1;ANTXR2;RP11;FGF5	Keratinocyte;Keratinocyte;Keratinocyte;Keratinocyte
chr4	80929071	80929271	Enhancer	AC097711.1;ANTXR2;RP11;FGF5	Keratinocyte;Keratinocyte;Keratinocyte;Keratinocyte
chr4	84674360	84674560	Enhancer	HELQ;MRPS18C	Keratinocyte;Keratinocyte
chr4	141037712	141037912	Enhancer	MGST2;H3F3AP6;MAML3;SCOC;RP11;ELMOD2	Keratinocyte;Keratinocyte;Keratinocyte;Keratinocyte;Keratinocyte;Keratinocyte
chr4	157701049	157701249	Enhancer	PDGFC	Keratinocyte
chr4	157868158	157868358	Enhancer	PDGFC;GLRB	Keratinocyte;Keratinocyte
chr4	159234817	159235017	Enhancer	RP11	Keratinocyte
chr4	160356995	160357195	Enhancer	RP11	Keratinocyte
chr4	177242802	177243002	Enhancer	SPCS3	HUVEC,Keratinocyte
chr4	177824014	177824214	Enhancer	NEIL3	Keratinocyte
chr4	184270369	184270569	Enhancer	WWC2;CLDN22;VTI1BP2;ING2;RWDD4;TRAPPC11	Keratinocyte;Keratinocyte;Keratinocyte;Keratinocyte;Keratinocyte;Keratinocyte
chr4	185714424	185714624	Enhancer	RP11;IRF2;RP11;CASP3;CCDC111;MLF1IP;ACSL1;RP11;SLC25A4	Keratinocyte;Keratinocyte;Keratinocyte;Keratinocyte;Keratinocyte;Keratinocyte;Keratinocyte;Keratinocyte;Keratinocyte
chr5	14154688	14154888	Enhancer	DNAH5;TRIO;FAM105A;CCT6P2;FAM105B;RBBP4P1	Keratinocyte;Keratinocyte;Keratinocyte;Keratinocyte;Keratinocyte;Keratinocyte
chr5	17118658	17118858	Enhancer	CTB;BASP1;CTD;7SK;CTD;FTH1P10	Keratinocyte;Keratinocyte;Keratinocyte;Keratinocyte;Keratinocyte;Keratinocyte
chr5	17224760	17224960	Enhancer	CTB;MYO10;AC091878.1;BASP1;CTD;7SK;CTD;FTH1P10	Keratinocyte;Keratinocyte;Keratinocyte;Keratinocyte;Keratinocyte;Keratinocyte;Keratinocyte;Keratinocyte
chr5	33320065	33320265	Enhancer	RP11;TARS;CTD	Keratinocyte;Keratinocyte;Keratinocyte
chr5	36527054	36527254	Enhancer	NIPBL	Keratinocyte
chr5	37721682	37721882	Enhancer	RP11;U6	HUVEC;HUVEC
chr5	37723076	37723276	Enhancer	RP11;U6	HUVEC;HUVEC
chr5	40682779	40682979	Enhancer	PTGER4	Keratinocyte
chr5	40682848	40683048	Enhancer	PTGER4	Keratinocyte
chr5	57138558	57138758	Enhancer	PLK2	Keratinocyte
chr5	61572795	61572995	Enhancer	KIF2A;DIMT1;IPO11	Keratinocyte;Keratinocyte;Keratinocyte
chr5	64486321	64486521	Enhancer	CTD	Keratinocyte
chr5	67067113	67067313	Enhancer	EEF1B2P2	Keratinocyte
chr5	71643741	71643941	Enhancer	MAP1B;AC026406.1;PTCD2;MRPS27;RPL7P22	Keratinocyte;Keratinocyte;Keratinocyte;Keratinocyte;Keratinocyte
chr5	77826174	77826374	Enhancer	AP3B1;CTD	Keratinocyte;Keratinocyte
chr5	78857150	78857350	Enhancer	RP11;RP11	Keratinocyte;Keratinocyte
chr5	80716163	80716363	Enhancer	ACOT12	Keratinocyte
chr5	100176182	100176382	Enhancer	FAM174A	Keratinocyte
chr5	110293922	110294122	Enhancer	SLC25A46;TMEM232;CTD	Keratinocyte;Keratinocyte;Keratinocyte
chr5	112383521	112383721	Enhancer	APC;SRP19;REEP5;DCP2;CTD	Keratinocyte;Keratinocyte;Keratinocyte;Keratinocyte;Keratinocyte
chr5	112860720	112860920	Enhancer	SRP19;CTD;TSSK1B;MCC;YTHDC2	HUVEC;HUVEC;HUVEC;HUVEC;HUVEC
chr5	115827828	115828028	Enhancer	CTD;RPS17P2	Keratinocyte;Keratinocyte
chr5	130618857	130619057	Enhancer	RP11;RP11;LYRM7;HINT1;CDC42SE2	Keratinocyte;Keratinocyte;Keratinocyte;Keratinocyte;Keratinocyte
chr5	142388555	142388755	Enhancer	RP11;NR3C1	Keratinocyte;Keratinocyte
chr5	148170788	148170988	Enhancer	ADRB2;SH3TC2;CTC;ABLIM3;PCYOX1L	Keratinocyte;Keratinocyte;Keratinocyte;Keratinocyte;Keratinocyte
chr5	148663437	148663637	Enhancer	ADRB2;ABLIM3;AFAP1L1;AC012613.2;GRPEL2;RP11;PCYOX1L;RP11;CTB;RPL29P14;CSNK1A1;ARHGEF37;PPARGC1B;AC008427.2;SLC26A2	Keratinocyte;Keratinocyte;Keratinocyte;Keratinocyte;Keratinocyte;Keratinocyte;Keratinocyte;Keratinocyte;Keratinocyte;Keratinocyte;Keratinocyte;Keratinocyte;Keratinocyte;Keratinocyte;Keratinocyte
chr5	148674515	148674715	Enhancer	ADRB2;AFAP1L1;AC012613.2;GRPEL2;RP11;PCYOX1L;RP11;CTB;RPL29P14;CSNK1A1;ARHGEF37;PPARGC1B;AC008427.2	Keratinocyte;Keratinocyte;Keratinocyte;Keratinocyte;Keratinocyte;Keratinocyte;Keratinocyte;Keratinocyte;Keratinocyte;Keratinocyte;Keratinocyte;Keratinocyte;Keratinocyte
chr5	148679036	148679236	Enhancer	ADRB2;AFAP1L1;AC012613.2;GRPEL2;RP11;PCYOX1L;RP11;IL17B;CTB;RPL29P14;CSNK1A1;ARHGEF37;PPARGC1B;AC008427.2	Keratinocyte;Keratinocyte;Keratinocyte;Keratinocyte;Keratinocyte;Keratinocyte;Keratinocyte;Keratinocyte;Keratinocyte;Keratinocyte;Keratinocyte;Keratinocyte;Keratinocyte;Keratinocyte
chr5	150534682	150534882	Enhancer	ZNF300;ZNF300P1;GPX3;ANXA6;GM2A;CCDC69;SLC36A3;SLC36A2;SLC36A1;FAT2;CTB;CTB;SPARC;RP11;G3BP1;ATOX1	Keratinocyte;Keratinocyte;Keratinocyte;Keratinocyte;Keratinocyte;Keratinocyte;Keratinocyte;Keratinocyte;Keratinocyte;Keratinocyte;Keratinocyte;Keratinocyte;Keratinocyte;Keratinocyte;Keratinocyte;Keratinocyte
chr5	153593884	153594084	Enhancer	GALNT10	Keratinocyte
chr5	156778142	156778342	Enhancer	FNDC9	HUVEC
chr5	167069809	167070009	Enhancer	ODZ2;CTB;CTB;CTC;CTB	Keratinocyte;Keratinocyte;Keratinocyte;Keratinocyte;Keratinocyte
chr5	167157067	167157267	Enhancer	CTB;CTB;CTC;CTB	Keratinocyte;Keratinocyte;Keratinocyte;Keratinocyte
chr5	171411962	171412162	Enhancer	FBXW11;STK10;UBTD2	Keratinocyte;Keratinocyte;Keratinocyte
chr5	171540298	171540498	Enhancer	FBXW11;STK10;EFCAB9;KLF3P1;UBTD2;SH3PXD2B;DUSP1	Keratinocyte;Keratinocyte;Keratinocyte;Keratinocyte;Keratinocyte;Keratinocyte;Keratinocyte
chr5	171612495	171612695	Enhancer	FBXW11;STK10;EFCAB9;UBTD2;SH3PXD2B;RP11;DUSP1;ERGIC1	Keratinocyte;Keratinocyte;Keratinocyte;Keratinocyte;Keratinocyte;Keratinocyte;Keratinocyte;Keratinocyte
chr6	2901612	2901812	Enhancer	WRNIP1;SERPINB9;FAM136BP;TUBB2A;RP1;PSMG4;TUBB2B	Keratinocyte;Keratinocyte;Keratinocyte;Keratinocyte;Keratinocyte;Keratinocyte;Keratinocyte
chr6	4059428	4059628	Enhancer	RP1;RP1;RP3;AL138831.1;RP3;PRPF4B;C6orf201;FAM217A;ECI2;RP3;RP3;RN5S202;CDYL	HUVEC,Keratinocyte;HUVEC,Keratinocyte;HUVEC,Keratinocyte;HUVEC,Keratinocyte;HUVEC,Keratinocyte;HUVEC,Keratinocyte;HUVEC,Keratinocyte;HUVEC,Keratinocyte;HUVEC,Keratinocyte;HUVEC,Keratinocyte;HUVEC,Keratinocyte;HUVEC;Keratinocyte
chr6	4582166	4582366	Enhancer	RP3;PRPF4B;CDYL;RP11;RPP40	Keratinocyte;Keratinocyte;Keratinocyte;Keratinocyte;Keratinocyte
chr6	10382984	10383184	Enhancer	RP3;RP1;TFAP2A;RP1;GCNT2;RP11;PAK1IP1;TMEM14C;TMEM14B;SYCP2L	Keratinocyte;Keratinocyte;Keratinocyte;Keratinocyte;Keratinocyte;Keratinocyte;Keratinocyte;Keratinocyte;Keratinocyte;Keratinocyte
chr6	16695044	16695244	Enhancer	RP1;ATXN1	Keratinocyte;Keratinocyte
chr6	16707705	16707905	Enhancer	RP1;ATXN1	Keratinocyte;Keratinocyte
chr6	16729510	16729710	Enhancer	RP1;ATXN1	Keratinocyte;Keratinocyte
chr6	26442190	26442390	Enhancer	HIST1H3C;HIST1H1C;HFE;HIST1H4C;HIST1H2BC;HIST1H2AC;HIST1H2BD;HIST1H2BE;HIST1H4H;H3F3AP1;BTN3A2;BTN2A2;BTN3A1;BTN2A3P;BTN3A3;BTN2A1;ABT1	Keratinocyte;Keratinocyte;Keratinocyte;Keratinocyte;Keratinocyte;Keratinocyte;Keratinocyte;Keratinocyte;Keratinocyte;Keratinocyte;Keratinocyte;Keratinocyte;Keratinocyte;Keratinocyte;Keratinocyte;Keratinocyte;Keratinocyte
chr6	27107656	27107856	Enhancer	HIST1H2BJ;HIST1H2AG;HIST1H4I;HIST1H2BK;HIST1H2AH	Keratinocyte;Keratinocyte;Keratinocyte;Keratinocyte;Keratinocyte
chr6	37207738	37207938	Enhancer	SRSF3;LAP3P2;CDKN1A;C6orf89;PPIL1;PIM1;TBC1D22B;TMEM217;RNF8;AL096712.1;CCDC167	Keratinocyte;Keratinocyte;Keratinocyte;Keratinocyte;Keratinocyte;Keratinocyte;Keratinocyte;Keratinocyte;Keratinocyte;Keratinocyte;Keratinocyte
chr6	37482999	37483199	Enhancer	COX6A1P2;RP3;PIM1;TBC1D22B;RNF8;AL096712.1;FTSJD2	Keratinocyte;Keratinocyte;Keratinocyte;Keratinocyte;Keratinocyte;Keratinocyte;Keratinocyte
chr6	37590584	37590784	Enhancer	COX6A1P2;PIM1;TBC1D22B;FTSJD2	Keratinocyte;Keratinocyte;Keratinocyte;Keratinocyte
chr6	44003347	44003547	Enhancer	GTPBP2;MAD2L1BP;RP5;TMEM63B;MRPL14;SLC29A1;HSP90AB1;SLC35B2;NFKBIE;AARS2;CDC5L	Keratinocyte;Keratinocyte;Keratinocyte;Keratinocyte;Keratinocyte;Keratinocyte;Keratinocyte;Keratinocyte;Keratinocyte;Keratinocyte;Keratinocyte
chr6	48103377	48103577	Enhancer	HNRNPA3P4	Keratinocyte
chr6	75811619	75811819	Enhancer	COL12A1;COX7A2;TMEM30A;RP1;HMGB1P39;RP11;RP11;FILIP1;RPL26P20	HUVEC;HUVEC;HUVEC;HUVEC;HUVEC;HUVEC;HUVEC;HUVEC;HUVEC
chr6	75811664	75811864	Enhancer	COL12A1;COX7A2;TMEM30A;RP1;HMGB1P39;RP11;RP11;FILIP1;RPL26P20	HUVEC;HUVEC;HUVEC;HUVEC;HUVEC;HUVEC;HUVEC;HUVEC;HUVEC
chr6	75811701	75811901	Enhancer	COL12A1;COX7A2;TMEM30A;RP1;HMGB1P39;RP11;RP11;FILIP1;RPL26P20	HUVEC;HUVEC;HUVEC;HUVEC;HUVEC;HUVEC;HUVEC;HUVEC;HUVEC
chr6	109217265	109217465	Enhancer	SNX3;FOXO3;SUMO2P8;RP11	Keratinocyte;Keratinocyte;Keratinocyte;Keratinocyte
chr6	116833341	116833541	Enhancer	NT5DC1;RP3;TSPYL4;DSE;RP3;TSPYL1;RP1;FAM26E;FAM26D;BET3L;ZUFSP;KPNA5	Keratinocyte;Keratinocyte;Keratinocyte;Keratinocyte;Keratinocyte;Keratinocyte;Keratinocyte;Keratinocyte;Keratinocyte;Keratinocyte;Keratinocyte;Keratinocyte
chr6	134744065	134744265	Enhancer	TBPL1;KRT8P42;RP11;FAM8A6P;RP3	Keratinocyte;Keratinocyte;Keratinocyte;Keratinocyte;Keratinocyte
chr6	138225659	138225859	Enhancer	BTF3L4P3;RP11;RP11;TNFAIP3;RP11;PERP	Keratinocyte;Keratinocyte;Keratinocyte;Keratinocyte;Keratinocyte;Keratinocyte
chr6	138226152	138226352	Enhancer	BTF3L4P3;RP11;RP11;TNFAIP3;RP11;PERP	Keratinocyte;Keratinocyte;Keratinocyte;Keratinocyte;Keratinocyte;Keratinocyte
chr6	142737310	142737510	Enhancer	VTA1;GPR126	HUVEC;HUVEC
chr6	143164238	143164438	Enhancer	RP1;RP1;RP1;RP1	Keratinocyte;Keratinocyte;Keratinocyte;Keratinocyte
chr6	143251173	143251373	Enhancer	RP1;HIVEP2;RP11;RP11;RP1;RP1;FUCA2	Keratinocyte;Keratinocyte;Keratinocyte;Keratinocyte;Keratinocyte;Keratinocyte;Keratinocyte
chr6	151605881	151606081	Enhancer	RP1	Keratinocyte
chr6	158251933	158252133	Enhancer	SNX9;RP11;RP3;SRP72P2	Keratinocyte;Keratinocyte;Keratinocyte;Keratinocyte
chr6	159458049	159458249	Enhancer	TMEM181;TATDN2P2;DYNLT1;SYTL3;TAGAP	Keratinocyte;Keratinocyte;Keratinocyte;Keratinocyte;Keratinocyte
chr6	160404591	160404791	Enhancer	RP1;WTAP;ACAT2;SOD2;TCP1;MRPL18;PNLDC1;IGF2R;RP11;SLC22A1;SLC22A3	Keratinocyte;Keratinocyte;Keratinocyte;Keratinocyte;Keratinocyte;Keratinocyte;Keratinocyte;Keratinocyte;Keratinocyte;Keratinocyte;Keratinocyte
chr6	160758834	160759034	Enhancer	ACAT2;TCP1;MRPL18;IGF2R;RP11	Keratinocyte;Keratinocyte;Keratinocyte;Keratinocyte;Keratinocyte
chr6	166901754	166901954	Enhancer	RPS6KA2;FAM103A2P	HUVEC;HUVEC
chr7	1027890	1028090	Enhancer	ADAP1;COX19;CYP2W1;GPR146;AC091729.7;AC091729.8;GPER;AC091729.9;ZFAND2A	HUVEC;HUVEC;HUVEC;HUVEC;HUVEC;HUVEC;HUVEC;HUVEC;HUVEC
chr7	6323813	6324013	Enhancer	CCZ1;PMS2;AIMP2;DAGLB;KDELR2;GRID2IP;ZDHHC4;AC079742.4;C7orf26;AC073343.9;RP11;AC073343.1;ZNF12;PMS2CL;CCZ1B	Keratinocyte;Keratinocyte;Keratinocyte;Keratinocyte;Keratinocyte;Keratinocyte;Keratinocyte;Keratinocyte;Keratinocyte;Keratinocyte;Keratinocyte;Keratinocyte;Keratinocyte;Keratinocyte;Keratinocyte
chr7	11122902	11123102	Enhancer	NDUFA4	Keratinocyte
chr7	12463009	12463209	Enhancer	ARL4A	Keratinocyte
chr7	19997778	19997978	Enhancer	MACC1;ITGB8	Keratinocyte;Keratinocyte
chr7	27086642	27086842	Enhancer	RPL7AP38;HMGB3P20;NHP2P2;HOXA1;HOXA2	Keratinocyte;Keratinocyte;Keratinocyte;Keratinocyte;Keratinocyte
chr7	28194557	28194757	Enhancer	TAX1BP1;JAZF1;JAZF1	Keratinocyte;Keratinocyte;Keratinocyte
chr7	38255478	38255678	Enhancer	STARD3NL	HUVEC
chr7	39775703	39775903	Enhancer	YAE1D1;AC011290.5;AC004837.3;AC004837.4;RALA;AC004837.5;LINC00265;C7orf10	Keratinocyte;Keratinocyte;Keratinocyte;Keratinocyte;Keratinocyte;Keratinocyte;Keratinocyte;Keratinocyte
chr7	43686789	43686989	Enhancer	STK17A;C7orf44	HUVEC;HUVEC
chr7	73769920	73770120	Enhancer	MIR590;LAT2;RFC2;CLIP2;GTF2IRD1	HUVEC;HUVEC;HUVEC;HUVEC;HUVEC
chr7	96651815	96652015	Enhancer	SHFM1;DLX6;DLX6;DLX5;HMGB3P21;AC073900.4	Keratinocyte;Keratinocyte;Keratinocyte;Keratinocyte;Keratinocyte;Keratinocyte
chr7	96652015	96652215	Enhancer	SHFM1;DLX6;DLX6;DLX5;HMGB3P21;AC073900.4	Keratinocyte;Keratinocyte;Keratinocyte;Keratinocyte;Keratinocyte;Keratinocyte
chr7	96652023	96652223	Enhancer	SHFM1;DLX6;DLX6;DLX5;HMGB3P21;AC073900.4	Keratinocyte;Keratinocyte;Keratinocyte;Keratinocyte;Keratinocyte;Keratinocyte
chr7	96652053	96652253	Enhancer	SHFM1;DLX6;DLX6;DLX5;HMGB3P21;AC073900.4	Keratinocyte;Keratinocyte;Keratinocyte;Keratinocyte;Keratinocyte;Keratinocyte
chr7	107744467	107744667	Enhancer	BCAP29;AC002467.7;CBLL1;DLD;U3;LAMB4;NRCAM;DNAJB9;PNPLA8	HUVEC;HUVEC;HUVEC;HUVEC;HUVEC;HUVEC;HUVEC;HUVEC;HUVEC
chr7	134050302	134050502	Enhancer	BPGM;CALD1	Keratinocyte;Keratinocyte
chr7	134246987	134247187	Enhancer	SLC35B4;AKR1B10;AC009276.4;CALD1;AGBL3;AC083862.6	Keratinocyte;Keratinocyte;Keratinocyte;Keratinocyte;Keratinocyte;Keratinocyte
chr7	135660001	135660201	Enhancer	NUP205;AC093107.7;C7orf73;AC015987.1;AC015987.2;MTPN	Keratinocyte;Keratinocyte;Keratinocyte;Keratinocyte;Keratinocyte;Keratinocyte
chr7	137367241	137367441	Enhancer	AC009245.3;AC024082.3	Keratinocyte;Keratinocyte
chr7	139736056	139736256	Enhancer	PARP12;SLC37A3	Keratinocyte;Keratinocyte
chr8	8946201	8946401	Enhancer	RP11;ERI1;RP11;PPP1R3B	Keratinocyte;Keratinocyte;Keratinocyte;Keratinocyte
chr8	20059914	20060114	Enhancer	INTS10;SLC18A1;ATP6V1B2;LZTS1	Keratinocyte;Keratinocyte;Keratinocyte;Keratinocyte
chr8	22048746	22048946	Enhancer	XPO7;NPM2;EPB49;FAM160B2;AC091171.1;NUDT18;HR;REEP4;LGI3;BMP1;AC105206.1;PHYHIP;POLR3D;CTD;PIWIL2;SLC39A14;PPP3CC;RP11;SORBS3;PDLIM2;C8orf58;KIAA1967	Keratinocyte;Keratinocyte;Keratinocyte;Keratinocyte;Keratinocyte;Keratinocyte;Keratinocyte;Keratinocyte;Keratinocyte;Keratinocyte;Keratinocyte;Keratinocyte;Keratinocyte;Keratinocyte;Keratinocyte;Keratinocyte;Keratinocyte;Keratinocyte;Keratinocyte;Keratinocyte;Keratinocyte;Keratinocyte
chr8	25056460	25056660	Enhancer	DOCK5;KCTD9;CDCA2	Keratinocyte;Keratinocyte;Keratinocyte
chr8	25077689	25077889	Enhancer	DOCK5;CDCA2	Keratinocyte;Keratinocyte
chr8	26297967	26298167	Enhancer	PPP2R2A;BNIP3L;SDAD1P1;RP11;RP11;DPYSL2;PNMA2;RP11	Keratinocyte;Keratinocyte;Keratinocyte;Keratinocyte;Keratinocyte;Keratinocyte;Keratinocyte;Keratinocyte
chr8	30513608	30513808	Enhancer	MAP2K1P1;TMEM66;LEPROTL1;RPS15AP24;CTD;TUBBP1;CTD;GS1;GTF2E2;GSR;UBXN8;PPP2CB;RP5;RP11;WRN	Keratinocyte;Keratinocyte;Keratinocyte;Keratinocyte;Keratinocyte;Keratinocyte;Keratinocyte;Keratinocyte;Keratinocyte;Keratinocyte;Keratinocyte;Keratinocyte;Keratinocyte;Keratinocyte;Keratinocyte
chr8	38262805	38263005	Enhancer	EIF4EBP1;ASH2L;RP11;STAR;BAG4;LSM1;DDHD2;PPAPDC1B;RP11;RP11;WHSC1L1;LETM2;RP11;RP11;RPS20P22;FGFR1;C8orf86;RNF5P1	HUVEC,Keratinocyte;HUVEC,Keratinocyte;HUVEC,Keratinocyte;HUVEC;HUVEC;HUVEC;HUVEC,Keratinocyte;HUVEC,Keratinocyte;HUVEC,Keratinocyte;HUVEC,Keratinocyte;HUVEC,Keratinocyte;HUVEC,Keratinocyte;HUVEC,Keratinocyte;HUVEC,Keratinocyte;HUVEC;HUVEC;HUVEC;HUVEC
chr8	38970673	38970873	Enhancer	RNF5P1;TACC1;PLEKHA2;CTD;HTRA4;TM2D2;ADAM9;ADAM32	Keratinocyte;Keratinocyte;Keratinocyte;Keratinocyte;Keratinocyte;Keratinocyte;Keratinocyte;Keratinocyte
chr8	42053764	42053964	Enhancer	AP3M2;PLAT;POLB;RP11;DKK4;VDAC3;RP11;C8orf40;SLC20A2	Keratinocyte;Keratinocyte;Keratinocyte;Keratinocyte;Keratinocyte;Keratinocyte;Keratinocyte;Keratinocyte;Keratinocyte
chr8	49194307	49194507	Enhancer	PRKDC;MCM4;SNAI2	Keratinocyte;Keratinocyte;Keratinocyte
chr8	49540170	49540370	Enhancer	RPL29P19;RP11;RP11;SNAI2	Keratinocyte;Keratinocyte;Keratinocyte;Keratinocyte
chr8	55066217	55066417	Enhancer	RP11;TDGF1P5;LYPLA1;MRPL15	Keratinocyte;Keratinocyte;Keratinocyte;Keratinocyte
chr8	56860955	56861155	Enhancer	TGS1;TMEM68;LYN;RP11;RPS20;CTA;NPM1P21;CHCHD7;SDR16C5	Keratinocyte;Keratinocyte;Keratinocyte;Keratinocyte;Keratinocyte;Keratinocyte;Keratinocyte;Keratinocyte;Keratinocyte
chr8	75494268	75494468	Enhancer	RP11	Keratinocyte
chr8	87535589	87535789	Enhancer	WWP1;CTD;CPNE3;CTD;FAM82B	Keratinocyte;Keratinocyte;Keratinocyte;Keratinocyte;Keratinocyte
chr8	90794547	90794747	Enhancer	RP11;RIPK2;NBN	Keratinocyte;Keratinocyte;Keratinocyte
chr8	103299594	103299794	Enhancer	NCALD;RRM2B;KB;KB;UBR5;KLF10	HUVEC;HUVEC;HUVEC;HUVEC;HUVEC;HUVEC
chr8	117363682	117363882	Enhancer	UTP23;EIF3H	Keratinocyte;Keratinocyte
chr8	126203962	126204162	Enhancer	NDUFB9;TATDN1;RP11;RP11;RP11;ZNF572;SQLE;KIAA0196;NSMCE2;KIAA0196;TRIB1	Keratinocyte;Keratinocyte;Keratinocyte;Keratinocyte;Keratinocyte;Keratinocyte;Keratinocyte;Keratinocyte;Keratinocyte;Keratinocyte;Keratinocyte
chr8	129195690	129195890	Enhancer	MYC;PVT1;U1;U4	Keratinocyte;Keratinocyte;Keratinocyte;Keratinocyte
chr8	130472065	130472265	Enhancer	GSDMC	Keratinocyte
chr8	131012140	131012340	Enhancer	GSDMC;RP11;FAM49B	Keratinocyte;Keratinocyte;Keratinocyte
chr9	5494248	5494448	Enhancer	CD274;KIAA1432;ERMP1	Keratinocyte;Keratinocyte;Keratinocyte
chr9	16704304	16704504	Enhancer	RP11	Keratinocyte
chr9	33143252	33143452	Enhancer	ASS1P12;TCEA1P;RP11;APTX;DNAJA1;SMU1;RP11;B4GALT1;BAG1;CHMP5;NFX1;AQP3;NOL6;SNX18P7;ANXA2P2	Keratinocyte;Keratinocyte;Keratinocyte;Keratinocyte;Keratinocyte;Keratinocyte;Keratinocyte;Keratinocyte;Keratinocyte;Keratinocyte;Keratinocyte;Keratinocyte;Keratinocyte;Keratinocyte;Keratinocyte
chr9	36150673	36150873	Enhancer	HINT2;RP11;YBX1P10;RP11;RECK;GLIPR2;CCIN;CLTA;HMGB3P24	HUVEC;HUVEC;HUVEC;HUVEC;HUVEC;HUVEC;HUVEC;HUVEC;HUVEC
chr9	79481468	79481668	Enhancer	VPS13A;RP11	Keratinocyte;Keratinocyte
chr9	80524174	80524374	Enhancer	RP11;GNAQ;RP11;RP11;RP11;RP11;CEP78;PSAT1	Keratinocyte;Keratinocyte;Keratinocyte;Keratinocyte;Keratinocyte;Keratinocyte;Keratinocyte;Keratinocyte
chr9	80524271	80524471	Enhancer	RP11;GNAQ;RP11;RP11;RP11;RP11;CEP78;PSAT1	Keratinocyte;Keratinocyte;Keratinocyte;Keratinocyte;Keratinocyte;Keratinocyte;Keratinocyte;Keratinocyte
chr9	99327774	99327974	Enhancer	HABP4;CDC14B	Keratinocyte;Keratinocyte
chr9	101820291	101820491	Enhancer	ALG2;SEC61B;KRT8P11	Keratinocyte;Keratinocyte;Keratinocyte
chr9	101821469	101821669	Enhancer	ALG2;SEC61B;KRT8P11	Keratinocyte;Keratinocyte;Keratinocyte
chr9	101881528	101881728	Enhancer	TGFBR1;ALG2;SEC61B;KRT8P11	Keratinocyte;Keratinocyte;Keratinocyte;Keratinocyte
chr9	109975975	109976175	Enhancer	RP11;ZNF462;RP11;HMGN2P32;KLF4	Keratinocyte;Keratinocyte;Keratinocyte;Keratinocyte;Keratinocyte
chr9	110310828	110311028	Enhancer	ZNF462;RP11;RP11;RAD23B	Keratinocyte;Keratinocyte;Keratinocyte;Keratinocyte
chr9	110310941	110311141	Enhancer	ZNF462;RP11;RP11;RAD23B	Keratinocyte;Keratinocyte;Keratinocyte;Keratinocyte
chr9	114688637	114688837	Enhancer	UGCG;KIAA0368	HUVEC;HUVEC
chr9	115950706	115950906	Enhancer	ZNF883;ZFP37;SLC31A2;FKBP15;SLC31A1;PRPF4;CDC26;WDR31;BSPRY;HDHD3;POLE3;RGS3	Keratinocyte;Keratinocyte;Keratinocyte;Keratinocyte;Keratinocyte;Keratinocyte;Keratinocyte;Keratinocyte;Keratinocyte;Keratinocyte;Keratinocyte;Keratinocyte
chr9	124218286	124218486	Enhancer	GSN;RAB14;RP11;GSN;GGTA1P	HUVEC;HUVEC;HUVEC;HUVEC;HUVEC
chr9	132758459	132758659	Enhancer	METTL11A;AL590369.1;GPR107;RP11;NCS1	Keratinocyte;Keratinocyte;Keratinocyte;Keratinocyte;Keratinocyte
chr9	132803408	132803608	Enhancer	ASB6;AL590369.1;FNBP1;GPR107;NCS1	Keratinocyte;Keratinocyte;Keratinocyte;Keratinocyte;Keratinocyte
chr9	133412980	133413180	Enhancer	ASS1;ABL1;RP11	Keratinocyte;Keratinocyte;Keratinocyte
chr9	133412995	133413195	Enhancer	ASS1;ABL1;RP11	Keratinocyte;Keratinocyte;Keratinocyte
chr10	5333587	5333787	Enhancer	AKR1C1;RP11;CALML5;CALML3;RP11;RP13;RP11;ASB13;FAM208B;GDI2;FBXO18	Keratinocyte;Keratinocyte;Keratinocyte;Keratinocyte;Keratinocyte;Keratinocyte;Keratinocyte;Keratinocyte;Keratinocyte;Keratinocyte;Keratinocyte
chr10	6342169	6342369	Enhancer	GDI2;FBXO18;RP11;RBM17;PFKFB3;7SK;AL137145.2;RP11;RP11	Keratinocyte;Keratinocyte;Keratinocyte;Keratinocyte;Keratinocyte;Keratinocyte;Keratinocyte;Keratinocyte;Keratinocyte
chr10	23801788	23801988	Enhancer	MSRB2;YWHAZP3	Keratinocyte;Keratinocyte
chr10	30072163	30072363	Enhancer	RP11;RP11	Keratinocyte;Keratinocyte
chr10	30092934	30093134	Enhancer	RP11;RP11	Keratinocyte;Keratinocyte
chr10	32702484	32702684	Enhancer	KIF5B;RP11;RP11;RP11;RP11;RP11;C1DP1	Keratinocyte;Keratinocyte;Keratinocyte;Keratinocyte;Keratinocyte;Keratinocyte;Keratinocyte
chr10	32702763	32702963	Enhancer	KIF5B;RP11;RP11;RP11;RP11;RP11;C1DP1	Keratinocyte;Keratinocyte;Keratinocyte;Keratinocyte;Keratinocyte;Keratinocyte;Keratinocyte
chr10	35417063	35417263	Enhancer	RP11;CUL2;CREM	Keratinocyte;Keratinocyte;Keratinocyte
chr10	63701152	63701352	Enhancer	ARID5B	Keratinocyte
chr10	69914113	69914313	Enhancer	RP11;HERC4	Keratinocyte;Keratinocyte
chr10	70426306	70426506	Enhancer	HNRNPH3;RP11;RP11;RP11;RP11;DDX21;KIAA1279	Keratinocyte;Keratinocyte;Keratinocyte;Keratinocyte;Keratinocyte;Keratinocyte;Keratinocyte
chr10	73592858	73593058	Enhancer	C10orf105;C10orf54;PSAP;CHST3;RP11;ANAPC16;ASCC1	Keratinocyte;Keratinocyte;Keratinocyte;Keratinocyte;Keratinocyte;Keratinocyte;Keratinocyte
chr10	79110934	79111134	Enhancer	RP11	Keratinocyte
chr10	79115572	79115772	Enhancer	RP11	Keratinocyte
chr10	89870687	89870887	Enhancer	ATAD1;PTEN;RP11	Keratinocyte;Keratinocyte;Keratinocyte
chr10	91275234	91275434	Enhancer	RP11;IFIT2;IFIT3	Keratinocyte;Keratinocyte;Keratinocyte
chr10	102831354	102831554	Enhancer	SEMA4G;RP11;C10orf2;MRPL43;LZTS2;PDZD7;SFXN3;KAZALD1;U2	Keratinocyte;Keratinocyte;Keratinocyte;Keratinocyte;Keratinocyte;Keratinocyte;Keratinocyte;Keratinocyte;Keratinocyte
chr10	105523655	105523855	Enhancer	TAF5;USMG5;PDCD11;NEURL;SH3PXD2A;RP11;OBFC1;SLK;COL17A1;SFR1;GSTO1;GSTO2;RP11;ITPRIP;CCDC147	Keratinocyte;Keratinocyte;Keratinocyte;Keratinocyte;Keratinocyte;Keratinocyte;Keratinocyte;Keratinocyte;Keratinocyte;Keratinocyte;Keratinocyte;Keratinocyte;Keratinocyte;Keratinocyte;Keratinocyte
chr10	118706838	118707038	Enhancer	HSPA12A;RP11;ENO4;RP11;RP11;RP11;KIAA1598;RP11	Keratinocyte;Keratinocyte;Keratinocyte;Keratinocyte;Keratinocyte;Keratinocyte;Keratinocyte;Keratinocyte
chr10	119122674	119122874	Enhancer	RP11;RP11;PDZD8;CTA	Keratinocyte;Keratinocyte;Keratinocyte;Keratinocyte
chr10	120489194	120489394	Enhancer	C10orf46	HUVEC
chr10	124233746	124233946	Enhancer	BTBD16;PLEKHA1;ARMS2;HTRA1;DMBT1	Keratinocyte;Keratinocyte;Keratinocyte;Keratinocyte;Keratinocyte
chr10	124234072	124234272	Enhancer	BTBD16;PLEKHA1;ARMS2;HTRA1;DMBT1	Keratinocyte;Keratinocyte;Keratinocyte;Keratinocyte;Keratinocyte
chr10	126136829	126137029	Enhancer	OAT;NKX1;LHPP	Keratinocyte;Keratinocyte;Keratinocyte
chr10	129789329	129789529	Enhancer	PTPRE;MKI67	Keratinocyte;Keratinocyte
chr10	134479555	134479755	Enhancer	STK32C;LRRC27;PWWP2B;INPP5A	Keratinocyte;Keratinocyte;Keratinocyte;Keratinocyte
chr11	11610642	11610842	Enhancer	RP11;CSNK2A1P;RP11;GALNTL4;DKK3;MICAL2	Keratinocyte;Keratinocyte;Keratinocyte;Keratinocyte;Keratinocyte;Keratinocyte
chr11	35954452	35954652	Enhancer	AC090625.1;PAMR1;FJX1;TRIM44;RP11;LDLRAD3;RP5;RP5;COMMD9;PRR5L	Keratinocyte;Keratinocyte;Keratinocyte;Keratinocyte;Keratinocyte;Keratinocyte;Keratinocyte;Keratinocyte;Keratinocyte;Keratinocyte
chr11	36382408	36382608	Enhancer	LDLRAD3;C11orf55;COMMD9;PRR5L;RP11;TRAF6;RAG1;RAG2	Keratinocyte;Keratinocyte;Keratinocyte;Keratinocyte;Keratinocyte;Keratinocyte;Keratinocyte;Keratinocyte
chr11	63974760	63974960	Enhancer	RCOR2;NAA40;COX8A;STIP1;FERMT3;NUDT22;TRPT1;DNAJC4;RP11;VEGFB;FKBP2;RP11;PPP1R14B;RP11;PLCB3;GPR137;BAD;KCNK4;RP11;C11orf20;ESRRA;TRMT112;PRDX5;AP003774.1;CCDC88B;RPS6KA4	HUVEC;HUVEC;HUVEC;HUVEC;HUVEC;HUVEC;HUVEC;HUVEC;HUVEC;HUVEC;HUVEC;HUVEC;HUVEC;HUVEC;HUVEC;HUVEC;HUVEC;HUVEC;HUVEC;HUVEC;HUVEC;HUVEC;HUVEC;HUVEC;HUVEC;HUVEC
chr11	67251577	67251777	Enhancer	AP003419.16;CORO1B;TMEM134;AIP;PITPNM1;CDK2AP2;GSTP1;RP11;C11orf72;NDUFV1;DOC2GP;RP11;RPL37P2	HUVEC;HUVEC;HUVEC;HUVEC;HUVEC;HUVEC;HUVEC;HUVEC;HUVEC;HUVEC;HUVEC;HUVEC;HUVEC
chr11	69065233	69065433	Enhancer	MYEOV;AP005232.1	Keratinocyte;Keratinocyte
chr11	69065342	69065542	Enhancer	MYEOV;AP005232.1	Keratinocyte;Keratinocyte
chr11	85775463	85775663	Enhancer	TMEM126B;TMEM126A;CREBZF;RP11;PICALM;FNTAL1;EED;RP11;C11orf73	Keratinocyte;Keratinocyte;Keratinocyte;Keratinocyte;Keratinocyte;Keratinocyte;Keratinocyte;Keratinocyte;Keratinocyte
chr11	114168661	114168861	Enhancer	ZBTB16;NNMT;C11orf71;REXO2;RP11;RP11	HUVEC;HUVEC;HUVEC;HUVEC;HUVEC;HUVEC
chr11	114168664	114168864	Enhancer	ZBTB16;NNMT;C11orf71;REXO2;RP11;RP11	HUVEC;HUVEC;HUVEC;HUVEC;HUVEC;HUVEC
chr11	116857694	116857894	Enhancer	AP000936.1;TAGLN;PCSK7;RNF214;CEP164;BACE1	Keratinocyte;Keratinocyte;Keratinocyte;Keratinocyte;Keratinocyte;Keratinocyte
chr11	117693962	117694162	Enhancer	RP11;FXYD2;RP11	HUVEC;HUVEC;HUVEC
chr11	118013414	118013614	Enhancer	SCN4B;SCN2B;MPZL2;ATP5L;RP11;MLL;TMEM25;RP11;RPL5P30;ARCN1;IFT46	Keratinocyte;Keratinocyte;Keratinocyte;Keratinocyte;Keratinocyte;Keratinocyte;Keratinocyte;Keratinocyte;Keratinocyte;Keratinocyte;Keratinocyte
chr11	122057620	122057820	Enhancer	RP11;RP11	Keratinocyte;Keratinocyte
chr11	122648956	122649156	Enhancer	CRTAM;C11orf63;U4;ATP5F1P5;RP11;RPL34P23;SNORD14E;SNORD14D;HSPA8;CLMP	HUVEC;HUVEC;HUVEC;HUVEC;HUVEC;HUVEC;HUVEC;HUVEC;HUVEC;HUVEC
chr11	124750255	124750455	Enhancer	TBRG1;RN5S352;SPA17;SIAE;NRGN;RP11;VSIG2;RP11;ESAM;RP11;MSANTD2;RP11;ROBO3;RP11;RP11;ROBO4;HEPACAM;CCDC15;SLC37A2;AP001007.1;TMEM218;RP11	HUVEC;HUVEC;HUVEC;HUVEC;HUVEC;HUVEC;HUVEC;HUVEC;HUVEC;HUVEC;HUVEC;HUVEC;HUVEC;HUVEC;HUVEC;HUVEC;HUVEC;HUVEC;HUVEC;HUVEC;HUVEC;HUVEC
chr11	126175660	126175860	Enhancer	NAP1L1P1;RP11;FAM118B;RPUSD4;FOXRED1;SRPR;TIRAP;RP11;DCPS;ST3GAL4	Keratinocyte;Keratinocyte;Keratinocyte;Keratinocyte;Keratinocyte;Keratinocyte;Keratinocyte;Keratinocyte;Keratinocyte;Keratinocyte
chr11	128065059	128065259	Enhancer	RP11;ETS1	Keratinocyte;Keratinocyte
chr11	128370575	128370775	Enhancer	RP11;ETS1	Keratinocyte;Keratinocyte
chr11	128373680	128373880	Enhancer	RP11;ETS1;C11orf45	Keratinocyte;Keratinocyte;Keratinocyte
chr11	128382684	128382884	Enhancer	RP11;ETS1;C11orf45	Keratinocyte;Keratinocyte;Keratinocyte
chr11	129781396	129781596	Enhancer	NFRKB	HUVEC
chr12	14553007	14553207	Enhancer	ATF7IP	Keratinocyte
chr12	15102130	15102330	Enhancer	RP11;HIST4H4;H2AFJ;WBP11;C12orf60;C12orf69;RP11;ART4;MGP;ERP27;ARHGDIB	HUVEC;HUVEC;HUVEC;HUVEC;HUVEC;HUVEC;HUVEC;HUVEC;HUVEC;HUVEC;HUVEC
chr12	18849620	18849820	Enhancer	PSMC1P9;PLCZ1;CAPZA3	Keratinocyte;Keratinocyte;Keratinocyte
chr12	19249006	19249206	Enhancer	RP11;RP11;AC092828.1;AEBP2;RP11;RP11;RP11	Keratinocyte;Keratinocyte;Keratinocyte;Keratinocyte;Keratinocyte;Keratinocyte;Keratinocyte
chr12	25205746	25205946	Enhancer	LRMP	Keratinocyte
chr12	40602592	40602792	Enhancer	LRRK2	Keratinocyte
chr12	46616564	46616764	Enhancer	SCAF11;SLC38A1;SLC38A2;RP11;RP11	Keratinocyte;Keratinocyte;Keratinocyte;Keratinocyte;Keratinocyte
chr12	47479695	47479895	Enhancer	FAM113B;AMIGO2;RP11;RP11	Keratinocyte;Keratinocyte;Keratinocyte;Keratinocyte
chr12	47665130	47665330	Enhancer	FAM113B;AMIGO2;RP11;RP11;RP11;RP11;RP3	Keratinocyte;Keratinocyte;Keratinocyte;Keratinocyte;Keratinocyte;Keratinocyte;Keratinocyte
chr12	50606000	50606200	Enhancer	BCDIN3D;RP11;RACGAP1;ASIC1;SMARCD1;GPD1;COX14;orphan;CERS5;RP3;RP3;LIMA1;RP11;LARP4;FAM186A;DIP2B	Keratinocyte;Keratinocyte;Keratinocyte;Keratinocyte;Keratinocyte;Keratinocyte;Keratinocyte;Keratinocyte;Keratinocyte;Keratinocyte;Keratinocyte;Keratinocyte;Keratinocyte;Keratinocyte;Keratinocyte;Keratinocyte
chr12	54359612	54359812	Enhancer	HOXC;HOXC5;HOXC6;HOXC9;HOXC;HOXC;HOXC4;COPZ1;ITGA5	HUVEC;HUVEC;HUVEC;HUVEC;HUVEC;HUVEC;HUVEC;HUVEC;HUVEC
chr12	54359697	54359897	Enhancer	HOXC;HOXC5;HOXC6;HOXC9;HOXC;HOXC;HOXC4;COPZ1;ITGA5	HUVEC;HUVEC;HUVEC;HUVEC;HUVEC;HUVEC;HUVEC;HUVEC;HUVEC
chr12	54359699	54359899	Enhancer	HOXC;HOXC5;HOXC6;HOXC9;HOXC;HOXC;HOXC4;COPZ1;ITGA5	HUVEC;HUVEC;HUVEC;HUVEC;HUVEC;HUVEC;HUVEC;HUVEC;HUVEC
chr12	54360031	54360231	Enhancer	HOXC;HOXC6;HOXC9;HOXC;HOXC;HOXC8;HOXC4;RP11;SMUG1	HUVEC;HUVEC;HUVEC;HUVEC;HUVEC;HUVEC;HUVEC;HUVEC;HUVEC
chr12	54360162	54360362	Enhancer	HOXC;HOXC6;HOXC9;HOXC;HOXC;HOXC8;HOXC4;RP11;SMUG1	HUVEC;HUVEC;HUVEC;HUVEC;HUVEC;HUVEC;HUVEC;HUVEC;HUVEC
chr12	54360360	54360560	Enhancer	HOXC;HOXC6;HOXC9;HOXC;HOXC;HOXC8;HOXC4;RP11;SMUG1	HUVEC;HUVEC;HUVEC;HUVEC;HUVEC;HUVEC;HUVEC;HUVEC;HUVEC
chr12	54360380	54360580	Enhancer	HOXC;HOXC6;HOXC9;HOXC;HOXC;HOXC8;HOXC4;RP11;SMUG1	HUVEC;HUVEC;HUVEC;HUVEC;HUVEC;HUVEC;HUVEC;HUVEC;HUVEC
chr12	54361016	54361216	Enhancer	HOXC;HOXC6;HOXC9;HOXC;HOXC;HOXC8;HOXC4;RP11;SMUG1	HUVEC;HUVEC;HUVEC;HUVEC;HUVEC;HUVEC;HUVEC;HUVEC;HUVEC
chr12	54807295	54807495	Enhancer	RP11;SMUG1;RP11;CBX5;HNRNPA1;NFE2;COPZ1;RP11;RP11;GPR84;ZNF385A;ITGA5	Keratinocyte;Keratinocyte;Keratinocyte;Keratinocyte;Keratinocyte;Keratinocyte;Keratinocyte;Keratinocyte;Keratinocyte;Keratinocyte;Keratinocyte;Keratinocyte
chr12	64310333	64310533	Enhancer	TMEM5;RP11;RP11;RP11;SRGAP1;RPL36AP41;RP11;RP11;XPOT	Keratinocyte;Keratinocyte;Keratinocyte;Keratinocyte;Keratinocyte;Keratinocyte;Keratinocyte;Keratinocyte;Keratinocyte
chr12	64680348	64680548	Enhancer	RP11;RP11;TBK1;RASSF3	HUVEC;HUVEC;HUVEC;HUVEC
chr12	69660284	69660484	Enhancer	CPSF6;RP11;YEATS4	HUVEC;HUVEC;HUVEC
chr12	88693446	88693646	Enhancer	C12orf29	Keratinocyte
chr12	91332223	91332423	Enhancer	RP11	Keratinocyte
chr12	91332379	91332579	Enhancer	RP11	Keratinocyte
chr12	95038625	95038825	Enhancer	RBMS2P1;CCDC41;RP11;RP11;RP11;TMCC3;NDUFA12;VEZT	Keratinocyte;Keratinocyte;Keratinocyte;Keratinocyte;Keratinocyte;Keratinocyte;Keratinocyte;Keratinocyte
chr12	96177424	96177624	Enhancer	METAP2;USP44;PGAM1P5;NTN4;U6;RP11;SNRPF;CCDC38;LTA4H;ELK3	HUVEC;HUVEC;HUVEC;HUVEC;HUVEC;HUVEC;HUVEC;HUVEC;HUVEC;HUVEC
chr12	96591998	96592198	Enhancer	ELK3;RP11;RP11;7SK;C12orf55	Keratinocyte;Keratinocyte;Keratinocyte;Keratinocyte;Keratinocyte
chr12	96839447	96839647	Enhancer	LTA4H;ELK3;RP11;RP11;CDK17;7SK	Keratinocyte;Keratinocyte;Keratinocyte;Keratinocyte;Keratinocyte;Keratinocyte
chr12	96839859	96840059	Enhancer	LTA4H;ELK3;RP11;RP11;CDK17;7SK	Keratinocyte;Keratinocyte;Keratinocyte;Keratinocyte;Keratinocyte;Keratinocyte
chr12	118744917	118745117	Enhancer	RFC5;WSB2;PEBP1;VSIG10;RPS2P5;TAOK3;SUDS3	Keratinocyte;Keratinocyte;Keratinocyte;Keratinocyte;Keratinocyte;Keratinocyte;Keratinocyte
chr12	118745038	118745238	Enhancer	RFC5;WSB2;PEBP1;VSIG10;RPS2P5;TAOK3;SUDS3	Keratinocyte;Keratinocyte;Keratinocyte;Keratinocyte;Keratinocyte;Keratinocyte;Keratinocyte
chr12	118796689	118796889	Enhancer	RFC5;WSB2;PEBP1;VSIG10;RPS2P5;TAOK3;SUDS3	Keratinocyte;Keratinocyte;Keratinocyte;Keratinocyte;Keratinocyte;Keratinocyte;Keratinocyte
chr12	118797425	118797625	Enhancer	RFC5;WSB2;PEBP1;VSIG10;RPS2P5;TAOK3;SUDS3	Keratinocyte;Keratinocyte;Keratinocyte;Keratinocyte;Keratinocyte;Keratinocyte;Keratinocyte
chr12	120111387	120111587	Enhancer	PRKAB1;RP11;RP1;CIT	HUVEC;HUVEC;HUVEC;HUVEC
chr12	123509572	123509772	Enhancer	HIP1R;RP11;VPS37B;OGFOD2;RP11;ARL6IP4;ABCB9	HUVEC;HUVEC;HUVEC;HUVEC;HUVEC;HUVEC;HUVEC
chr12	123762834	123763034	Enhancer	PITPNM2;RP11;CDK2AP1	HUVEC;HUVEC;HUVEC
chr13	24845528	24845728	Enhancer	C1QTNF9;PARP4;PSPC1P2	Keratinocyte;Keratinocyte;Keratinocyte
chr13	41187706	41187906	Enhancer	RLIMP1	Keratinocyte
chr13	41187826	41188026	Enhancer	RLIMP1	Keratinocyte
chr13	43565299	43565499	Enhancer	ZDHHC4P1;EPSTI1;DNAJC15	Keratinocyte;Keratinocyte;Keratinocyte
chr13	45285050	45285250	Enhancer	GTF2F2;TPT1	Keratinocyte;Keratinocyte
chr13	52197767	52197967	Enhancer	INTS6;RPS4XP16;AL354820.1;WDFY2;AL139183.1;DHRS12;CTAGE3P;FABP5P2;ALG11;UTP14C	Keratinocyte;Keratinocyte;Keratinocyte;Keratinocyte;Keratinocyte;Keratinocyte;Keratinocyte;Keratinocyte;Keratinocyte;Keratinocyte
chr13	75900418	75900618	Enhancer	TBC1D4;COMMD6;UCHL3	HUVEC;HUVEC;HUVEC
chr13	98039444	98039644	Enhancer	MBNL2;RAP2A	Keratinocyte;Keratinocyte
chr13	99562786	99562986	Enhancer	STK24;NUS1P4;CALM2P4;SLC15A1;DOCK9;RPL7L1P12;DOCK9;RP11;AL391122.1;GAPDHP22;UBAC2;UBAC2;RN7SKP9;H2AFZP3;GPR18;GPR183;TM9SF2	Keratinocyte;Keratinocyte;Keratinocyte;Keratinocyte;Keratinocyte;Keratinocyte;Keratinocyte;Keratinocyte;Keratinocyte;Keratinocyte;Keratinocyte;Keratinocyte;Keratinocyte;Keratinocyte;Keratinocyte;Keratinocyte;Keratinocyte
chr13	100033281	100033481	Enhancer	RPL7L1P12;DOCK9;AL391122.1;GAPDHP22;UBAC2;UBAC2;RN7SKP9;H2AFZP3;GPR18;GPR183;LINC00449;TM9SF2	Keratinocyte;Keratinocyte;Keratinocyte;Keratinocyte;Keratinocyte;Keratinocyte;Keratinocyte;Keratinocyte;Keratinocyte;Keratinocyte;Keratinocyte;Keratinocyte
chr13	106756590	106756790	Enhancer	EFNB2;ATP5G1P5	Keratinocyte;Keratinocyte
chr13	107160326	107160526	Enhancer	LINC00460;EFNB2;ARGLU1;ATP5G1P5	Keratinocyte;Keratinocyte;Keratinocyte;Keratinocyte
chr13	114016040	114016240	Enhancer	CUL4A;PCID2;LDHBP1;LAMP1;GRTP1;GRTP1	Keratinocyte;Keratinocyte;Keratinocyte;Keratinocyte;Keratinocyte;Keratinocyte
chr13	114831450	114831650	Enhancer	TFDP1;FAM70B;GAS6;GAS6;UPF3A;CHAMP1	Keratinocyte;Keratinocyte;Keratinocyte;Keratinocyte;Keratinocyte;Keratinocyte
chr14	25142740	25142940	Enhancer	CHMP4A;NEDD8;TINF2	Keratinocyte;Keratinocyte;Keratinocyte
chr14	61790835	61791035	Enhancer	RP11;TMEM30B;HIF1A;RP11;RP11;SNAPC1	Keratinocyte;Keratinocyte;Keratinocyte;Keratinocyte;Keratinocyte;Keratinocyte
chr14	61809218	61809418	Enhancer	RP11;TRMT5;PRKCH;TMEM30B;RP11;HIF1A;RP11;SNAPC1	Keratinocyte;Keratinocyte;Keratinocyte;Keratinocyte;Keratinocyte;Keratinocyte;Keratinocyte;Keratinocyte
chr14	61946003	61946203	Enhancer	RP11;PRKCH;TMEM30B;RP11;RP11;RP11;RP11;RP11;HIF1A;RP11;RP11;RP11;SNAPC1;CTD	Keratinocyte;Keratinocyte;Keratinocyte;Keratinocyte;Keratinocyte;Keratinocyte;Keratinocyte;Keratinocyte;Keratinocyte;Keratinocyte;Keratinocyte;Keratinocyte;Keratinocyte;Keratinocyte
chr14	62128958	62129158	Enhancer	TMEM30B;RP11;RP11;RP11;HIF1A;RP11;SNAPC1;CTD;RP11;RP11	Keratinocyte;Keratinocyte;Keratinocyte;Keratinocyte;Keratinocyte;Keratinocyte;Keratinocyte;Keratinocyte;Keratinocyte;Keratinocyte
chr14	65758817	65759017	Enhancer	PLEKHG3;SPTB;CHURC1;CHURC1;GPX2;FNTB;MAX;CTD;CTD;RP11;RP11	Keratinocyte;Keratinocyte;Keratinocyte;Keratinocyte;Keratinocyte;Keratinocyte;Keratinocyte;Keratinocyte;Keratinocyte;Keratinocyte;Keratinocyte
chr14	70478867	70479067	Enhancer	SLC39A9;ERH;KIAA0247;SRSF5;SMOC1;RPL7AP6	Keratinocyte;Keratinocyte;Keratinocyte;Keratinocyte;Keratinocyte;Keratinocyte
chr14	78055478	78055678	Enhancer	SPTLC2;CTD;ALKBH1;SLIRP;C14orf178;SNW1;ADCK1	Keratinocyte;Keratinocyte;Keratinocyte;Keratinocyte;Keratinocyte;Keratinocyte;Keratinocyte
chr14	94679394	94679594	Enhancer	OTUB2;DDX24;IFI27L1;IFI27;IFI27L2;RP11;RPSAP4	Keratinocyte;Keratinocyte;Keratinocyte;Keratinocyte;Keratinocyte;Keratinocyte;Keratinocyte
chr14	99720109	99720309	Enhancer	RPL3P4;AL162151.3;BCL11B;CCDC85C	Keratinocyte;Keratinocyte;Keratinocyte;Keratinocyte
chr14	100613592	100613792	Enhancer	EVL;DEGS2;RP11;AL157871.2;SLC25A29;RP11;RP11;WARS	Keratinocyte;Keratinocyte;Keratinocyte;Keratinocyte;Keratinocyte;Keratinocyte;Keratinocyte;Keratinocyte
chr14	104400043	104400243	Enhancer	EIF5;RP11;MARK3;CKB;RP11;TRMT61A;KLC1;APOPT1;RP11;RP11;AL049840.1;XRCC3;ZFYVE21;PPP1R13B;CTD;C14orf2	Keratinocyte;Keratinocyte;Keratinocyte;Keratinocyte;Keratinocyte;Keratinocyte;Keratinocyte;Keratinocyte;Keratinocyte;Keratinocyte;Keratinocyte;Keratinocyte;Keratinocyte;Keratinocyte;Keratinocyte;Keratinocyte
chr15	37173538	37173738	Enhancer	C15orf41;RP11	Keratinocyte;Keratinocyte
chr15	40201468	40201668	Enhancer	GPR176;RP11;EIF2AK4;SRP14;RP11;BUB1B;PAK6;RP11;RP11;RP11	Keratinocyte;Keratinocyte;Keratinocyte;Keratinocyte;Keratinocyte;Keratinocyte;Keratinocyte;Keratinocyte;Keratinocyte;Keratinocyte
chr15	48042913	48043113	Enhancer	CTD	Keratinocyte
chr15	52774334	52774534	Enhancer	TMOD3;MAPK6;CTD;CTD;GNB5;EEF1B2P1;MYO5A;ARPP19;RP11;FAM214A;RPSAP55	Keratinocyte;Keratinocyte;Keratinocyte;Keratinocyte;Keratinocyte;Keratinocyte;Keratinocyte;Keratinocyte;Keratinocyte;Keratinocyte;Keratinocyte
chr15	55543264	55543464	Enhancer	RP11;CCPG1;RP11;RP11	Keratinocyte;Keratinocyte;Keratinocyte;Keratinocyte
chr15	59640409	59640609	Enhancer	RNF111;RP11;SLTM;CCNB2;LDHAL6B;RP11;RP11;FAM81A;MYO1E;RP11;RP11;GTF2A2;RP11;RP11;BNIP2;RPS3AP6	Keratinocyte;Keratinocyte;Keratinocyte;Keratinocyte;Keratinocyte;Keratinocyte;Keratinocyte;Keratinocyte;Keratinocyte;Keratinocyte;Keratinocyte;Keratinocyte;Keratinocyte;Keratinocyte;Keratinocyte;Keratinocyte
chr15	62149816	62150016	Enhancer	VPS13C;C2CD4B	HUVEC;HUVEC
chr15	65176253	65176453	Enhancer	GAPDHP61;RP11;PIF1;AC069368.3;PLEKHO2;PDCD7;CLPX;SNORA24	Keratinocyte;Keratinocyte;Keratinocyte;Keratinocyte;Keratinocyte;Keratinocyte;Keratinocyte;Keratinocyte
chr15	67366714	67366914	Enhancer	RP11;SMAD3;RP11;RP11;IQCH;AAGAB	Keratinocyte;Keratinocyte;Keratinocyte;Keratinocyte;Keratinocyte;Keratinocyte
chr15	69339128	69339328	Enhancer	ANP32A;NOX5;RP11;KIF23;RPLP1	Keratinocyte;Keratinocyte;Keratinocyte;Keratinocyte;Keratinocyte
chr15	74243681	74243881	Enhancer	LOXL1;RP11;STOML1;PML	HUVEC;HUVEC;HUVEC;HUVEC
chr15	81591636	81591836	Enhancer	RP11;STARD5;RP11;TMC3	Keratinocyte;Keratinocyte;Keratinocyte;Keratinocyte
chr15	91381497	91381697	Enhancer	CTD;CTD;FURIN;FES;MAN2A2;AC068831.15;UNC45A;HDDC3;AC068831.3;RCCD1;AC068831.6;AC068831.8;PRC1;VPS33B;AC068831.10	Keratinocyte;Keratinocyte;Keratinocyte;Keratinocyte;Keratinocyte;Keratinocyte;Keratinocyte;Keratinocyte;Keratinocyte;Keratinocyte;Keratinocyte;Keratinocyte;Keratinocyte;Keratinocyte;Keratinocyte
chr15	92611435	92611635	Enhancer	SLCO3A1;RP11;RP11	Keratinocyte;Keratinocyte;Keratinocyte
chr15	101860937	101861137	Enhancer	ALDH1A3;CHSY1;SELS;SNRPA1;RP11;RP11;TM2D3	Keratinocyte;Keratinocyte;Keratinocyte;Keratinocyte;Keratinocyte;Keratinocyte;Keratinocyte
chr16	4464327	4464527	Enhancer	GLIS2;RP11;PAM16;VASN;CORO7;CORO7;DNAJA3;HMOX2;NMRAL1;C16orf5;C16orf96;RP11;FAM100A;MGRN1;NUDT16L1;ANKS3;ZNF500;ROGDI;GLYR1;UBN1	Keratinocyte;Keratinocyte;Keratinocyte;Keratinocyte;Keratinocyte;Keratinocyte;Keratinocyte;Keratinocyte;Keratinocyte;Keratinocyte;Keratinocyte;Keratinocyte;Keratinocyte;Keratinocyte;Keratinocyte;Keratinocyte;Keratinocyte;Keratinocyte;Keratinocyte;Keratinocyte
chr16	12895629	12895829	Enhancer	CPPED1;RP11	Keratinocyte;Keratinocyte
chr16	15991591	15991791	Enhancer	NDE1;CTB;AF001548.5;MYH11;CTA;FOPNL;RPL15P20;ABCC1;RPL17P40;NOMO3;RP11;PKD1P1	Keratinocyte;Keratinocyte;Keratinocyte;Keratinocyte;Keratinocyte;Keratinocyte;Keratinocyte;Keratinocyte;Keratinocyte;Keratinocyte;Keratinocyte;Keratinocyte
chr16	48157460	48157660	Enhancer	UBA52P8;SIAH1	Keratinocyte;Keratinocyte
chr16	66551009	66551209	Enhancer	CDH5;CTD;CTD;CTD;RP11;RP11;RP11;TK2;CKLF;CKLF;CMTM1;CMTM3;RP11;NAE1;PDP2;RP11;RP11;CBFB	HUVEC;HUVEC;HUVEC;HUVEC;HUVEC;HUVEC;HUVEC;HUVEC;HUVEC;HUVEC;HUVEC;HUVEC;HUVEC;HUVEC;HUVEC;HUVEC;HUVEC;HUVEC
chr16	69511594	69511794	Enhancer	HAS3;RP11;CIRH1A;CHTF8;SNTB2;VPS4A;RP11;PDF;RP11;NIP7;COG8;RP11;RP11;TERF2;CYB5B;RP11;RP11;RP11;NQO1;CTD;NOB1;CTD;WWP2	Keratinocyte;Keratinocyte;Keratinocyte;Keratinocyte;Keratinocyte;Keratinocyte;Keratinocyte;Keratinocyte;Keratinocyte;Keratinocyte;Keratinocyte;Keratinocyte;Keratinocyte;Keratinocyte;Keratinocyte;Keratinocyte;Keratinocyte;Keratinocyte;Keratinocyte;Keratinocyte;Keratinocyte;Keratinocyte;Keratinocyte
chr16	82226419	82226619	Enhancer	7SK;SDR42E1;HSD17B2	Keratinocyte;Keratinocyte;Keratinocyte
chr16	82226484	82226684	Enhancer	7SK;SDR42E1;HSD17B2	Keratinocyte;Keratinocyte;Keratinocyte
chr16	84133351	84133551	Enhancer	RP11;MBTPS1;RP11;HSDL1;DNAAF1;RP11	Keratinocyte;Keratinocyte;Keratinocyte;Keratinocyte;Keratinocyte;Keratinocyte
chr16	88767091	88767291	Enhancer	RP11;ZC3H18;IL17C;CYBA;MVD;RP5;SNAI3;RP5;RNF166;CTU2;RP5;RP5;RP5;PIEZO1;CDT1;APRT;TRAPPC2L;GALNS;RP11	HUVEC;HUVEC;HUVEC;HUVEC;HUVEC;HUVEC;HUVEC;HUVEC;HUVEC;HUVEC;HUVEC;HUVEC;HUVEC;HUVEC;HUVEC;HUVEC;HUVEC;HUVEC;HUVEC
chr16	89381804	89382004	Enhancer	TRAPPC2L;RP11;AC137932.5;AC137932.6;ANKRD11;SPG7;RP11;RPL13;CPNE7;C16orf55;CHMP1A;CDK10;SPATA2L;RP11;ZNF276;C16orf7;TCF25;TUBB3;DEF8;AFG3L1P	Keratinocyte;Keratinocyte;Keratinocyte;Keratinocyte;Keratinocyte;Keratinocyte;Keratinocyte;Keratinocyte;Keratinocyte;Keratinocyte;Keratinocyte;Keratinocyte;Keratinocyte;Keratinocyte;Keratinocyte;Keratinocyte;Keratinocyte;Keratinocyte;Keratinocyte;Keratinocyte
chr16	89382149	89382349	Enhancer	TRAPPC2L;RP11;AC137932.5;AC137932.6;ANKRD11;SPG7;RP11;RPL13;CPNE7;C16orf55;CHMP1A;CDK10;SPATA2L;RP11;ZNF276;C16orf7;TCF25;TUBB3;DEF8;AFG3L1P	Keratinocyte;Keratinocyte;Keratinocyte;Keratinocyte;Keratinocyte;Keratinocyte;Keratinocyte;Keratinocyte;Keratinocyte;Keratinocyte;Keratinocyte;Keratinocyte;Keratinocyte;Keratinocyte;Keratinocyte;Keratinocyte;Keratinocyte;Keratinocyte;Keratinocyte;Keratinocyte
chr16	89382270	89382470	Enhancer	TRAPPC2L;RP11;AC137932.5;AC137932.6;ANKRD11;SPG7;RP11;RPL13;CPNE7;C16orf55;CHMP1A;CDK10;SPATA2L;RP11;ZNF276;C16orf7;TCF25;TUBB3;DEF8;AFG3L1P	Keratinocyte;Keratinocyte;Keratinocyte;Keratinocyte;Keratinocyte;Keratinocyte;Keratinocyte;Keratinocyte;Keratinocyte;Keratinocyte;Keratinocyte;Keratinocyte;Keratinocyte;Keratinocyte;Keratinocyte;Keratinocyte;Keratinocyte;Keratinocyte;Keratinocyte;Keratinocyte
chr16	89431587	89431787	Enhancer	ACSF3;RP11;ZNF778;RP11;RP11;AC137932.5;AC137932.6;ANKRD11;SPG7;RP11;RPL13;CPNE7;C16orf55;CHMP1A;CDK10;SPATA2L;RP11;ZNF276;C16orf7;FANCA;SPIRE2;TCF25;TUBB3;DEF8;AFG3L1P	Keratinocyte;Keratinocyte;Keratinocyte;Keratinocyte;Keratinocyte;Keratinocyte;Keratinocyte;Keratinocyte;Keratinocyte;Keratinocyte;Keratinocyte;Keratinocyte;Keratinocyte;Keratinocyte;Keratinocyte;Keratinocyte;Keratinocyte;Keratinocyte;Keratinocyte;Keratinocyte;Keratinocyte;Keratinocyte;Keratinocyte;Keratinocyte;Keratinocyte
chr17	1547839	1548039	Enhancer	CRK;MYO1C;INPP5K;AC100748.2;PITPNA;AC130343.1;SLC43A2;SCARF1;RILP;PRPF8;TLCD2;MIR22;WDR81;MIR22HG;RP11;SERPINF2;SERPINF1;RPA1;SMYD4;AC016292.3;RTN4RL1;DPH1;OVCA2	HUVEC,Keratinocyte;HUVEC,Keratinocyte;HUVEC,Keratinocyte;HUVEC,Keratinocyte;HUVEC,Keratinocyte;HUVEC;HUVEC;HUVEC,Keratinocyte;HUVEC,Keratinocyte;HUVEC,Keratinocyte;HUVEC,Keratinocyte;HUVEC;HUVEC;HUVEC,Keratinocyte;HUVEC,Keratinocyte;HUVEC;Keratinocyte;Keratinocyte;Keratinocyte;Keratinocyte;Keratinocyte;Keratinocyte;Keratinocyte
chr17	1547859	1548059	Enhancer	CRK;MYO1C;INPP5K;AC100748.2;PITPNA;AC130343.1;SLC43A2;SCARF1;RILP;PRPF8;TLCD2;MIR22;WDR81;MIR22HG;RP11;SERPINF2;SERPINF1;RPA1;SMYD4;AC016292.3;RTN4RL1;DPH1;OVCA2	HUVEC,Keratinocyte;HUVEC,Keratinocyte;HUVEC,Keratinocyte;HUVEC,Keratinocyte;HUVEC,Keratinocyte;HUVEC;HUVEC;HUVEC,Keratinocyte;HUVEC,Keratinocyte;HUVEC,Keratinocyte;HUVEC,Keratinocyte;HUVEC;HUVEC;HUVEC,Keratinocyte;HUVEC,Keratinocyte;HUVEC;Keratinocyte;Keratinocyte;Keratinocyte;Keratinocyte;Keratinocyte;Keratinocyte;Keratinocyte
chr17	1547890	1548090	Enhancer	CRK;MYO1C;INPP5K;AC100748.2;PITPNA;AC130343.1;SLC43A2;SCARF1;RILP;PRPF8;TLCD2;MIR22;WDR81;MIR22HG;RP11;SERPINF2;SERPINF1;RPA1;SMYD4;AC016292.3;RTN4RL1;DPH1;OVCA2	HUVEC,Keratinocyte;HUVEC,Keratinocyte;HUVEC,Keratinocyte;HUVEC,Keratinocyte;HUVEC,Keratinocyte;HUVEC;HUVEC;HUVEC,Keratinocyte;HUVEC,Keratinocyte;HUVEC,Keratinocyte;HUVEC,Keratinocyte;HUVEC;HUVEC;HUVEC,Keratinocyte;HUVEC,Keratinocyte;HUVEC;Keratinocyte;Keratinocyte;Keratinocyte;Keratinocyte;Keratinocyte;Keratinocyte;Keratinocyte
chr17	4615065	4615265	Enhancer	RYKP1;ANKFY1;RP11;RP11;PELP1;RP11;ARRB2;MED11;RP11;CXCL16;ZMYND15;RP11;PLD2;C17orf107;CHRNE;RNF167;SLC25A11;ENO3;PFN1;SPAG7;RP5;RP5;CAMTA2;RP5;INCA1;KIF1C;AC109333.10;SLC52A1;ZFP3;AC012146.7;USP6;ZNF232	Keratinocyte;Keratinocyte;Keratinocyte;Keratinocyte;Keratinocyte;Keratinocyte;Keratinocyte;Keratinocyte;Keratinocyte;Keratinocyte;Keratinocyte;Keratinocyte;Keratinocyte;Keratinocyte;Keratinocyte;Keratinocyte;Keratinocyte;Keratinocyte;Keratinocyte;Keratinocyte;Keratinocyte;Keratinocyte;Keratinocyte;Keratinocyte;Keratinocyte;Keratinocyte;Keratinocyte;Keratinocyte;Keratinocyte;Keratinocyte;Keratinoc…
chr17	7287552	7287752	Enhancer	ACADVL;DLG4;DVL2;PHF23;GABARAP;CTD;C17orf81;CTDNEP1;RP1;CLDN7;SLC2A4;YBX2;EIF5A;GPS2;RP11;NEURL4;ACAP1;KCTD11;RP11;TMEM95;TNK1;C17orf61;PLSCR3;C17orf61;NLGN2;RP11;TMEM102;RP11;FGF11;RP11;CHRNB1;SLC35G6;ZBTB4;POLR2A;TNFSF13;SENP3;EIF4A1;MPDU1;AC113189.5;SOX15;FXR2;RPL29P2	Keratinocyte;Keratinocyte;Keratinocyte;Keratinocyte;Keratinocyte;Keratinocyte;Keratinocyte;Keratinocyte;Keratinocyte;Keratinocyte;Keratinocyte;Keratinocyte;Keratinocyte;Keratinocyte;Keratinocyte;Keratinocyte;Keratinocyte;Keratinocyte;Keratinocyte;Keratinocyte;Keratinocyte;Keratinocyte;Keratinocyte;Keratinocyte;Keratinocyte;Keratinocyte;Keratinocyte;Keratinocyte;Keratinocyte;Keratinocyte;Keratinoc…
chr17	16323381	16323581	Enhancer	TTC19;ZSWIM7;NCOR1;PIGL;AC005971.3;CENPV;UBB;TRPV2;AC093484.4;C17orf76;FAM211A;AC005822.1;CCDC144A;ZNF287;ZNF624	HUVEC;HUVEC;HUVEC;HUVEC;HUVEC;HUVEC;HUVEC,Keratinocyte;HUVEC,Keratinocyte;HUVEC;HUVEC,Keratinocyte;HUVEC,Keratinocyte;HUVEC;HUVEC;Keratinocyte;Keratinocyte
chr17	17753416	17753616	Enhancer	SMCR2;RAI1;RAI1;SMCR5;SREBF1;AC122129.1;TOM1L2;AC087163.2;ATPAF2;C17orf39;DRG2;ALKBH5;LLGL1;FLII;SMCR7;SMCR8;SHMT1	HUVEC;HUVEC;HUVEC;HUVEC;HUVEC;HUVEC;HUVEC;HUVEC;HUVEC;HUVEC;HUVEC;HUVEC;HUVEC;HUVEC;HUVEC;HUVEC;HUVEC
chr17	19207467	19207667	Enhancer	EPN2;EPN2;EPN2;MAPK7;B9D1;MFAP4;RNF112;RPL17P43;RPS2P46;SLC47A1	HUVEC;HUVEC;HUVEC;HUVEC;HUVEC;HUVEC;HUVEC;HUVEC;HUVEC;HUVEC
chr17	19273819	19274019	Enhancer	FAM18B1;AC090286.2;FAM83G;SNORD3B;SNORD3D;SNORD3A;EPN2;EPN2;EPN2;MAPK7;B9D1;MFAP4;RNF112;RPL17P43;RPS2P46;SLC47A1;ALDH3A2	Keratinocyte;Keratinocyte;Keratinocyte;Keratinocyte;Keratinocyte;Keratinocyte;Keratinocyte;Keratinocyte;Keratinocyte;Keratinocyte;Keratinocyte;Keratinocyte;Keratinocyte;Keratinocyte;Keratinocyte;Keratinocyte;Keratinocyte
chr17	30399044	30399244	Enhancer	C17orf79;SUZ12	HUVEC;HUVEC
chr17	40426790	40426990	Enhancer	KRT16;EIF1;CNP;NKIRAS2;STAT5B;STAT5A;STAT3;PTRF;ATP6V0A1;AC067852.1;NAGLU;HSD17B1;MLX;TUBG1;FAM134C;TUBG2;PLEKHH3;CCR10;CNTNAP1;VPS25;CCDC56;PSME3;AOC2	Keratinocyte;Keratinocyte;Keratinocyte;Keratinocyte;Keratinocyte;Keratinocyte;Keratinocyte;Keratinocyte;Keratinocyte;Keratinocyte;Keratinocyte;Keratinocyte;Keratinocyte;Keratinocyte;Keratinocyte;Keratinocyte;Keratinocyte;Keratinocyte;Keratinocyte;Keratinocyte;Keratinocyte;Keratinocyte;Keratinocyte
chr17	47465556	47465756	Enhancer	RP11;ZNF652;RP11;PHB;AC004797.1;NGFR;RP5;NXPH3;KAT7;RP11	Keratinocyte;Keratinocyte;Keratinocyte;Keratinocyte;Keratinocyte;Keratinocyte;Keratinocyte;Keratinocyte;Keratinocyte;Keratinocyte
chr17	53025800	53026000	Enhancer	STXBP4;COX11	HUVEC;HUVEC
chr17	53497473	53497673	Enhancer	MMD;CTD;PCTP	Keratinocyte;Keratinocyte;Keratinocyte
chr17	57451207	57451407	Enhancer	TRIM37;SKA2;PRR11;YPEL2;DHX40;PTRH2	Keratinocyte;Keratinocyte;Keratinocyte;Keratinocyte;Keratinocyte;Keratinocyte
chr17	57861541	57861741	Enhancer	DHX40;CLTC;RPS6KB1	Keratinocyte;Keratinocyte;Keratinocyte
chr17	76380822	76381022	Enhancer	PGS1	Keratinocyte
chr17	76815117	76815317	Enhancer	TK1;BIRC5;SOCS3;CYTH1;USP36;AC100788.1;TIMP2	HUVEC;HUVEC;HUVEC;HUVEC;HUVEC;HUVEC;HUVEC
chr17	80545075	80545275	Enhancer	LRRC45;FASN;CCDC57;SLC16A3;AC132872.1;CSNK1D;RP13;HEXDC;C17orf101;C17orf62;NARF;FOXK2;RP13;RP13;WDR45L;RAB40B;RP11;FN3K;RP11;TBCD;ZNF750;RP11	Keratinocyte;Keratinocyte;Keratinocyte;Keratinocyte;Keratinocyte;Keratinocyte;Keratinocyte;Keratinocyte;Keratinocyte;Keratinocyte;Keratinocyte;Keratinocyte;Keratinocyte;Keratinocyte;Keratinocyte;Keratinocyte;Keratinocyte;Keratinocyte;Keratinocyte;Keratinocyte;Keratinocyte;Keratinocyte
chr17	80545172	80545372	Enhancer	LRRC45;FASN;CCDC57;SLC16A3;AC132872.1;CSNK1D;RP13;HEXDC;C17orf101;C17orf62;NARF;FOXK2;RP13;RP13;WDR45L;RAB40B;RP11;FN3K;RP11;TBCD;ZNF750;RP11	Keratinocyte;Keratinocyte;Keratinocyte;Keratinocyte;Keratinocyte;Keratinocyte;Keratinocyte;Keratinocyte;Keratinocyte;Keratinocyte;Keratinocyte;Keratinocyte;Keratinocyte;Keratinocyte;Keratinocyte;Keratinocyte;Keratinocyte;Keratinocyte;Keratinocyte;Keratinocyte;Keratinocyte;Keratinocyte
chr17	80545210	80545410	Enhancer	LRRC45;FASN;CCDC57;SLC16A3;AC132872.1;CSNK1D;RP13;HEXDC;C17orf101;C17orf62;NARF;FOXK2;RP13;RP13;WDR45L;RAB40B;RP11;FN3K;RP11;TBCD;ZNF750;RP11	Keratinocyte;Keratinocyte;Keratinocyte;Keratinocyte;Keratinocyte;Keratinocyte;Keratinocyte;Keratinocyte;Keratinocyte;Keratinocyte;Keratinocyte;Keratinocyte;Keratinocyte;Keratinocyte;Keratinocyte;Keratinocyte;Keratinocyte;Keratinocyte;Keratinocyte;Keratinocyte;Keratinocyte;Keratinocyte
chr17	81006385	81006585	Enhancer	ZNF750;RP11;B3GNTL1;METRNL;AC144831.1	HUVEC;HUVEC;HUVEC;HUVEC;HUVEC
chr17	81006397	81006597	Enhancer	ZNF750;RP11;B3GNTL1;METRNL;AC144831.1	HUVEC;HUVEC;HUVEC;HUVEC;HUVEC
chr17	81006424	81006624	Enhancer	ZNF750;RP11;B3GNTL1;METRNL;AC144831.1	HUVEC;HUVEC;HUVEC;HUVEC;HUVEC
chr17	81041923	81042123	Enhancer	FOXK2;WDR45L;FN3KRP;TBCD;B3GNTL1;METRNL;AC144831.1	Keratinocyte;Keratinocyte;Keratinocyte;Keratinocyte;Keratinocyte;Keratinocyte;Keratinocyte
chr18	3467074	3467274	Enhancer	MYL12A;MYL12B;RP11;RP11;TGIF1;RP11	HUVEC;HUVEC;HUVEC;HUVEC;HUVEC;HUVEC
chr18	10057833	10058033	Enhancer	RALBP1;PPP4R1;AC006238.1;VAPA	Keratinocyte;Keratinocyte;Keratinocyte;Keratinocyte
chr18	13052129	13052329	Enhancer	SEH1L;CEP192	HUVEC;HUVEC
chr18	21154160	21154360	Enhancer	TMEM241;C18orf8;NPC1;ANKRD29;LAMA3;TTC39C;CABYR	Keratinocyte;Keratinocyte;Keratinocyte;Keratinocyte;Keratinocyte;Keratinocyte;Keratinocyte
chr18	21418823	21419023	Enhancer	TMEM241;RIOK3;C18orf8;NPC1;ANKRD29;LAMA3;TTC39C;CABYR	Keratinocyte;Keratinocyte;Keratinocyte;Keratinocyte;Keratinocyte;Keratinocyte;Keratinocyte;Keratinocyte
chr18	29673998	29674198	Enhancer	MCART2;RNF125;RP11;RNF138;AC021224.1;HNRNPA1P7	Keratinocyte;Keratinocyte;Keratinocyte;Keratinocyte;Keratinocyte;Keratinocyte
chr18	33196923	33197123	Enhancer	ZNF397;ZSCAN30;ZNF271;ZNF24;RP11;GALNT1	Keratinocyte;Keratinocyte;Keratinocyte;Keratinocyte;Keratinocyte;Keratinocyte
chr18	33196945	33197145	Enhancer	ZNF397;ZSCAN30;ZNF271;ZNF24;RP11;GALNT1	Keratinocyte;Keratinocyte;Keratinocyte;Keratinocyte;Keratinocyte;Keratinocyte
chr19	2082022	2082222	Enhancer	REXO1;KLF16;CTB;FAM108A1;SCAMP4;AC012615.1;CSNK1G2;BTBD2;MKNK2;MOB3A;IZUMO4;AP3D1;DOT1L;PLEKHJ1;SF3A2;LSM7;SPPL2B;TIMM13;LMNB2;GADD45B	Keratinocyte;Keratinocyte;Keratinocyte;Keratinocyte;Keratinocyte;Keratinocyte;Keratinocyte;Keratinocyte;Keratinocyte;Keratinocyte;Keratinocyte;Keratinocyte;Keratinocyte;Keratinocyte;Keratinocyte;Keratinocyte;Keratinocyte;Keratinocyte;Keratinocyte;Keratinocyte
chr19	2085186	2085386	Enhancer	REXO1;KLF16;CTB;FAM108A1;SCAMP4;AC012615.1;CSNK1G2;BTBD2;MKNK2;MOB3A;IZUMO4;AP3D1;DOT1L;PLEKHJ1;SF3A2;LSM7;SPPL2B;TIMM13;LMNB2;GADD45B	Keratinocyte;Keratinocyte;Keratinocyte;Keratinocyte;Keratinocyte;Keratinocyte;Keratinocyte;Keratinocyte;Keratinocyte;Keratinocyte;Keratinocyte;Keratinocyte;Keratinocyte;Keratinocyte;Keratinocyte;Keratinocyte;Keratinocyte;Keratinocyte;Keratinocyte;Keratinocyte
chr19	2085197	2085397	Enhancer	REXO1;KLF16;CTB;FAM108A1;SCAMP4;AC012615.1;CSNK1G2;BTBD2;MKNK2;MOB3A;IZUMO4;AP3D1;DOT1L;PLEKHJ1;SF3A2;LSM7;SPPL2B;TIMM13;LMNB2;GADD45B	Keratinocyte;Keratinocyte;Keratinocyte;Keratinocyte;Keratinocyte;Keratinocyte;Keratinocyte;Keratinocyte;Keratinocyte;Keratinocyte;Keratinocyte;Keratinocyte;Keratinocyte;Keratinocyte;Keratinocyte;Keratinocyte;Keratinocyte;Keratinocyte;Keratinocyte;Keratinocyte
chr19	4327250	4327450	Enhancer	MIR637;ZBTB7A;MAP2K2;SIRT6;ANKRD24;EBI3;CCDC94;FSD1;MPND;SH3GL1;CHAF1A;UBXN6;AC011498.1;AC011498.2;PLIN4;PLIN5;SEMA6B;TNFAIP8L1;C19orf10;DPP9	HUVEC;HUVEC;HUVEC;HUVEC;HUVEC;HUVEC;HUVEC;HUVEC;HUVEC;HUVEC;HUVEC;HUVEC;HUVEC;HUVEC;HUVEC;HUVEC;HUVEC;HUVEC;HUVEC;HUVEC
chr19	4328645	4328845	Enhancer	MAP2K2;SIRT6;CCDC94;FSD1;SH3GL1;CHAF1A;UBXN6;AC011498.1;SEMA6B;DAPK3;EEF2;PIAS4;ZBTB7A;ANKRD24;EBI3;SHD;AC011498.2;PLIN4;PLIN5	HUVEC;HUVEC;HUVEC;HUVEC;HUVEC;HUVEC;HUVEC;HUVEC;HUVEC;HUVEC;HUVEC;HUVEC;HUVEC;HUVEC;HUVEC;HUVEC;HUVEC;HUVEC;HUVEC
chr19	4328659	4328859	Enhancer	MAP2K2;SIRT6;CCDC94;FSD1;SH3GL1;CHAF1A;UBXN6;AC011498.1;SEMA6B;DAPK3;EEF2;PIAS4;ZBTB7A;ANKRD24;EBI3;SHD;AC011498.2;PLIN4;PLIN5	HUVEC;HUVEC;HUVEC;HUVEC;HUVEC;HUVEC;HUVEC;HUVEC;HUVEC;HUVEC;HUVEC;HUVEC;HUVEC;HUVEC;HUVEC;HUVEC;HUVEC;HUVEC;HUVEC
chr19	4328718	4328918	Enhancer	DAPK3;EEF2;PIAS4;ZBTB7A;MAP2K2;SIRT6;ANKRD24;EBI3;CCDC94;SHD;FSD1;SH3GL1;CHAF1A;UBXN6;AC011498.1;AC011498.2;PLIN4;PLIN5;SEMA6B	HUVEC;HUVEC;HUVEC;HUVEC;HUVEC;HUVEC;HUVEC;HUVEC;HUVEC;HUVEC;HUVEC;HUVEC;HUVEC;HUVEC;HUVEC;HUVEC;HUVEC;HUVEC;HUVEC
chr19	10105876	10106076	Enhancer	FBXL12;UBL5;PIN1;DNMT1;FDX1L;RAVER1;TYK2;MIR1181;CDC37;PDE4A;KEAP1;SLC44A2;ILF3	HUVEC;HUVEC;HUVEC;HUVEC;HUVEC;HUVEC;HUVEC;HUVEC;HUVEC;HUVEC;HUVEC;HUVEC;HUVEC
chr19	13540493	13540693	Enhancer	JUNB;PRDX2;RNASEH2A	HUVEC;HUVEC;HUVEC
chr19	15411740	15411940	Enhancer	CASP14;BRD4;AKAP8;AKAP8L;WIZ;AD000091.1	Keratinocyte;Keratinocyte;Keratinocyte;Keratinocyte;Keratinocyte;Keratinocyte
chr19	16253054	16253254	Enhancer	CYP4F11;TPM4;RAB8A;HSH2D;FAM32A;AP1M1	Keratinocyte;Keratinocyte;Keratinocyte;Keratinocyte;Keratinocyte;Keratinocyte
chr19	16436957	16437157	Enhancer	TPM4;RAB8A;FAM32A;AP1M1;KLF2;C19orf44;CHERP;SLC35E1;SIN3B	HUVEC;HUVEC;HUVEC;HUVEC;HUVEC;HUVEC;HUVEC;HUVEC;HUVEC
chr19	16676997	16677197	Enhancer	TPM4;FAM32A;AP1M1;KLF2;AC020917.1;CTD;EPS15L1;C19orf44;AC008764.1;CHERP;SLC35E1;MED26;C19orf42;TMEM38A	HUVEC;HUVEC;HUVEC;HUVEC;HUVEC;HUVEC;HUVEC;HUVEC;HUVEC;HUVEC;HUVEC;HUVEC;HUVEC;HUVEC
chr19	38974850	38975050	Enhancer	YIF1B;CATSPERG;snoU13;RYR1;ACTN4;CAPN12;ECH1;HNRNPL;RINL;NFKBIB;SIRT2;MRPS12;SARS2;PAK4	HUVEC;HUVEC;HUVEC;HUVEC;HUVEC;HUVEC;HUVEC;HUVEC;HUVEC;HUVEC;HUVEC;HUVEC;HUVEC;HUVEC
chr19	41700169	41700369	Enhancer	CYP2S1;AXL;B9D2;CTC;BCKDHA	Keratinocyte;Keratinocyte;Keratinocyte;Keratinocyte;Keratinocyte
chr19	41827794	41827994	Enhancer	CTD;CYP2S1;AXL;HNRNPUL1;AC011510.1;CCDC97;TMEM91;TGFB1;B9D2;CTC;EXOSC5;BCKDHA;B3GNT8;ATP5SL;CEACAM21;RPS19;RABAC1	HUVEC;HUVEC;HUVEC;HUVEC;HUVEC;HUVEC;HUVEC;HUVEC;HUVEC;HUVEC;HUVEC;HUVEC;HUVEC;HUVEC;HUVEC;HUVEC;HUVEC
chr19	46313204	46313404	Enhancer	CD3EAP;PPP1R13L;FOSB;ERCC1;PPM1N;RTN2;VASP;SIX5;DMPK;IGFL3;TGIF1P1;IGFL1;PPP5C	Keratinocyte;Keratinocyte;Keratinocyte;Keratinocyte;Keratinocyte;Keratinocyte;Keratinocyte;Keratinocyte;Keratinocyte;Keratinocyte;Keratinocyte;Keratinocyte;Keratinocyte
chr19	46684743	46684943	Enhancer	SYMPK;PGLYRP1;TGIF1P1;IGFL2;CCDC8;AC011551.1	Keratinocyte;Keratinocyte;Keratinocyte;Keratinocyte;Keratinocyte;Keratinocyte
chr20	20351902	20352102	Enhancer	RPL12L3;RIN2	Keratinocyte;Keratinocyte
chr20	33115743	33115943	Enhancer	EIF2S2;XPOTP1;RP4;RP4;AHCY;ITCH;CDC42P1;ITCH;ITCH;FDX1P1;DYNLRB1;MAP1LC3A;PIGU;TP53INP2;NCOA6;HMGB3P1	Keratinocyte;Keratinocyte;Keratinocyte;Keratinocyte;Keratinocyte;Keratinocyte;Keratinocyte;Keratinocyte;Keratinocyte;Keratinocyte;Keratinocyte;Keratinocyte;Keratinocyte;Keratinocyte;Keratinocyte;Keratinocyte
chr20	44406781	44406981	Enhancer	WFDC3;DNTTIP1;UBE2C;TNNC2;SNX21;ACOT8;ZSWIM3;ZSWIM1;SPATA25;CTSA;NEURL2;PLTP;PCIF1;ZNF335;RPL13P2;CD40	Keratinocyte;Keratinocyte;Keratinocyte;Keratinocyte;Keratinocyte;Keratinocyte;Keratinocyte;Keratinocyte;Keratinocyte;Keratinocyte;Keratinocyte;Keratinocyte;Keratinocyte;Keratinocyte;Keratinocyte;Keratinocyte
chr20	49114673	49114873	Enhancer	RNF114;UBE2V1;TMEM189;CEBPB;PTPN1;AL133230.1;RP4;RPL36P2;FAM65C;PARD6B;BCAS4;TMSB4XP6;PSMD10P1;RP5;ADNP;DPM1;MOCS3	Keratinocyte;Keratinocyte;Keratinocyte;Keratinocyte;Keratinocyte;Keratinocyte;Keratinocyte;Keratinocyte;Keratinocyte;Keratinocyte;Keratinocyte;Keratinocyte;Keratinocyte;Keratinocyte;Keratinocyte;Keratinocyte;Keratinocyte
chr20	49140360	49140560	Enhancer	RNF114;KRT18P4;UBE2V1;TMEM189;RP11;CEBPB;AL034429.1;PTPN1;AL133230.1;RP4;RPL36P2;FAM65C;PARD6B;BCAS4;TMSB4XP6;PSMD10P1;RP5;ADNP;DPM1;MOCS3	Keratinocyte;Keratinocyte;Keratinocyte;Keratinocyte;Keratinocyte;Keratinocyte;Keratinocyte;Keratinocyte;Keratinocyte;Keratinocyte;Keratinocyte;Keratinocyte;Keratinocyte;Keratinocyte;Keratinocyte;Keratinocyte;Keratinocyte;Keratinocyte;Keratinocyte;Keratinocyte
chr20	49158146	49158346	Enhancer	RNF114;UBE2V1;TMEM189;TMEM189;CEBPB;AL034429.1;PTPN1;AL133230.1;RP4;RPL36P2;FAM65C;PARD6B;BCAS4;TMSB4XP6;PSMD10P1;RP5;ADNP;DPM1;MOCS3	Keratinocyte;Keratinocyte;Keratinocyte;Keratinocyte;Keratinocyte;Keratinocyte;Keratinocyte;Keratinocyte;Keratinocyte;Keratinocyte;Keratinocyte;Keratinocyte;Keratinocyte;Keratinocyte;Keratinocyte;Keratinocyte;Keratinocyte;Keratinocyte;Keratinocyte
chr21	17106109	17106309	Enhancer	USP25	Keratinocyte
chr21	30009154	30009354	Enhancer	AF131217.1;HSPD1P7;THUMPD1P1;LTN1;RPL23P2;CCT8;BACH1	Keratinocyte;Keratinocyte;Keratinocyte;Keratinocyte;Keratinocyte;Keratinocyte;Keratinocyte
chr21	36418666	36418866	Enhancer	RCAN1;EZH2P1	Keratinocyte;Keratinocyte
chr21	39661696	39661896	Enhancer	KCNJ15;SPATA20P1	Keratinocyte;Keratinocyte
chr21	39832452	39832652	Enhancer	KCNJ15;SPATA20P1;ETS2	Keratinocyte;Keratinocyte;Keratinocyte
chr21	40017353	40017553	Enhancer	KCNJ15;ERG;PSMG1	Keratinocyte;Keratinocyte;Keratinocyte
chr22	19752769	19752969	Enhancer	UFD1L;TBX1;AC000089.3;C22orf29;GNB1L;COMT;TXNRD2;C22orf25;RANBP1	Keratinocyte;Keratinocyte;Keratinocyte;Keratinocyte;Keratinocyte;Keratinocyte;Keratinocyte;Keratinocyte;Keratinocyte
chr22	20906266	20906466	Enhancer	ZNF74;SCARF2;XXbac;KRT18P5;KLHL22;MED15;AC007050.17;SMPD4P1;FAM108A5P;AC007308.6;SERPIND1;LZTR1	HUVEC;HUVEC;HUVEC;HUVEC;HUVEC;HUVEC;HUVEC;HUVEC;HUVEC;HUVEC;HUVEC;HUVEC
chr22	28536041	28536241	Enhancer	TTC28	Keratinocyte
chr22	34199219	34199419	Enhancer	LARGE;LARGE	Keratinocyte;Keratinocyte
chr22	38029378	38029578	Enhancer	MFNG;CDC42EP1;LGALS2;GGA1;Z83844.1;PDXP;LGALS1;NOL12;NOL12;TRIOBP;H1F0;GCAT;MIR658;ANKRD54;EIF3L;MICALL1;POLR2F;C22orf23;SOX10;RP5;PICK1;MAFF;TMEM184B	HUVEC;HUVEC;HUVEC;HUVEC;HUVEC;HUVEC;HUVEC;HUVEC;HUVEC;HUVEC;HUVEC;HUVEC;HUVEC;HUVEC;HUVEC;HUVEC;HUVEC;HUVEC;HUVEC;HUVEC;HUVEC;HUVEC;HUVEC
chr22	46367517	46367717	Enhancer	ATXN10;RP1;WNT7B;C22orf26;RP6;RP6;PPARA;C22orf40;TTC38	Keratinocyte;Keratinocyte;Keratinocyte;Keratinocyte;Keratinocyte;Keratinocyte;Keratinocyte;Keratinocyte;Keratinocyte
chr22	50154970	50155170	Enhancer	RP5	Keratinocyte

## Sheet: list of hypo enhancer nodule
chr1	2187357	2187862
chr1	6088307	6088507
chr1	7168303	7168503
chr1	15575618	15575818
chr1	25554414	25554614
chr1	31118763	31118963
chr1	31229022	31229222
chr1	31263694	31263894
chr1	39428163	39428363
chr1	40525069	40525269
chr1	40735975	40736175
chr1	82168646	82169415
chr1	84831493	84831693
chr1	90321353	90321553
chr1	112942187	112942387
chr1	150971653	150971989
chr1	151072326	151072526
chr1	151129744	151129944
chr1	153358824	153359024
chr1	156127427	156127627
chr1	167586838	167587038
chr1	167607132	167607332
chr1	170635022	170635222
chr1	172668486	172668686
chr1	184861011	184861211
chr1	186062673	186062873
chr1	186708160	186708360
chr1	204433959	204434159
chr1	204695116	204695316
chr1	209897514	209897937
chr1	209943031	209943231
chr1	214577621	214577821
chr1	215130854	215131054
chr1	218880429	218880629
chr1	220310770	220310970
chr1	224023197	224023640
chr1	230259488	230259688
chr1	234867200	234867400
chr2	9427937	9428764
chr2	9518224	9518424
chr2	10237442	10237642
chr2	16835058	16835258
chr2	37938540	37938740
chr2	54823511	54823868
chr2	65459246	65460105
chr2	69023442	69023642
chr2	70161465	70161665
chr2	85121986	85122186
chr2	97204301	97204501
chr2	102517022	102517222
chr2	102717338	102717538
chr2	102875272	102875472
chr2	102954250	102954450
chr2	109227383	109227583
chr2	109257329	109257529
chr2	114008807	114009007
chr2	118879712	118879912
chr2	120213076	120213276
chr2	138775056	138775256
chr2	160082860	160083060
chr2	161156121	161156321
chr2	161189022	161189222
chr2	161934136	161934336
chr2	190309086	190309286
chr2	191709027	191709227
chr2	192186313	192186513
chr2	192710574	192711123
chr2	196424281	196424481
chr2	202519459	202519659
chr2	206004653	206004853
chr2	206564386	206565328
chr2	208087896	208088096
chr2	223385921	223386121
chr2	224749280	224749480
chr2	224761569	224761769
chr2	227292378	227292578
chr2	237652269	237652469
chr3	4780405	4780605
chr3	16553399	16553599
chr3	30654771	30655165
chr3	30699956	30700536
chr3	31052152	31052352
chr3	31055997	31056197
chr3	32290982	32291182
chr3	32434239	32434439
chr3	37095899	37096099
chr3	38648888	38649088
chr3	45160170	45160370
chr3	58335632	58335832
chr3	61656197	61656397
chr3	65605192	65605392
chr3	69417318	69417518
chr3	98690440	98690640
chr3	99113036	99113236
chr3	107704488	107704688
chr3	111414572	111414772
chr3	118903628	118903828
chr3	124829307	124829507
chr3	127487165	127487365
chr3	135702010	135702210
chr3	142164740	142164940
chr3	142569121	142569321
chr3	154688602	154688802
chr3	159603935	159604135
chr3	167742600	167742800
chr3	169067094	169067294
chr3	184158930	184159130
chr3	184483765	184483965
chr3	189742929	189743129
chr3	193973296	193973496
chr3	194210693	194210893
chr3	197215156	197215356
chr4	5039921	5040121
chr4	13923546	13923746
chr4	37839119	37839319
chr4	40992567	40992767
chr4	40995000	40995200
chr4	71860500	71860700
chr4	80928889	80929271
chr4	84674360	84674560
chr4	141037712	141037912
chr4	157701049	157701249
chr4	157868158	157868358
chr4	159234817	159235017
chr4	160356995	160357195
chr4	177242802	177243002
chr4	177824014	177824214
chr4	184270369	184270569
chr4	185714424	185714624
chr5	14154688	14154888
chr5	17118658	17118858
chr5	17224760	17224960
chr5	33320065	33320265
chr5	36527054	36527254
chr5	37721682	37721882
chr5	37723076	37723276
chr5	40682779	40683048
chr5	57138558	57138758
chr5	61572795	61572995
chr5	64486321	64486521
chr5	67067113	67067313
chr5	71643741	71643941
chr5	77826174	77826374
chr5	78857150	78857350
chr5	80716163	80716363
chr5	100176182	100176382
chr5	110293922	110294122
chr5	112383521	112383721
chr5	112860720	112860920
chr5	115827828	115828028
chr5	130618857	130619057
chr5	142388555	142388755
chr5	148170788	148170988
chr5	148663437	148663637
chr5	148674515	148674715
chr5	148679036	148679236
chr5	150534682	150534882
chr5	153593884	153594084
chr5	156778142	156778342
chr5	167069809	167070009
chr5	167157067	167157267
chr5	171411962	171412162
chr5	171540298	171540498
chr5	171612495	171612695
chr6	2901612	2901812
chr6	4059428	4059628
chr6	4582166	4582366
chr6	10382984	10383184
chr6	16695044	16695244
chr6	16707705	16707905
chr6	16729510	16729710
chr6	26442190	26442390
chr6	27107656	27107856
chr6	37207738	37207938
chr6	37482999	37483199
chr6	37590584	37590784
chr6	44003347	44003547
chr6	48103377	48103577
chr6	75811619	75811901
chr6	109217265	109217465
chr6	116833341	116833541
chr6	134744065	134744265
chr6	138225659	138226352
chr6	142737310	142737510
chr6	143164238	143164438
chr6	143251173	143251373
chr6	151605881	151606081
chr6	158251933	158252133
chr6	159458049	159458249
chr6	160404591	160404791
chr6	160758834	160759034
chr6	166901754	166901954
chr7	1027890	1028090
chr7	6323813	6324013
chr7	11122902	11123102
chr7	12463009	12463209
chr7	19997778	19997978
chr7	27086642	27086842
chr7	28194557	28194757
chr7	38255478	38255678
chr7	39775703	39775903
chr7	43686789	43686989
chr7	73769920	73770120
chr7	96651815	96652253
chr7	107744467	107744667
chr7	134050302	134050502
chr7	134246987	134247187
chr7	135660001	135660201
chr7	137367241	137367441
chr7	139736056	139736256
chr8	8946201	8946401
chr8	20059914	20060114
chr8	22048746	22048946
chr8	25056460	25056660
chr8	25077689	25077889
chr8	26297967	26298167
chr8	30513608	30513808
chr8	38262805	38263005
chr8	38970673	38970873
chr8	42053764	42053964
chr8	49194307	49194507
chr8	49540170	49540370
chr8	55066217	55066417
chr8	56860955	56861155
chr8	75494268	75494468
chr8	87535589	87535789
chr8	90794547	90794747
chr8	103299594	103299794
chr8	117363682	117363882
chr8	126203962	126204162
chr8	129195690	129195890
chr8	130472065	130472265
chr8	131012140	131012340
chr9	5494248	5494448
chr9	16704304	16704504
chr9	33143252	33143452
chr9	36150673	36150873
chr9	79481468	79481668
chr9	80524174	80524471
chr9	99327774	99327974
chr9	101820291	101820491
chr9	101821469	101821669
chr9	101881528	101881728
chr9	109975975	109976175
chr9	110310828	110311141
chr9	114688637	114688837
chr9	115950706	115950906
chr9	124218286	124218486
chr9	132758459	132758659
chr9	132803408	132803608
chr9	133412980	133413195
chr10	5333587	5333787
chr10	6342169	6342369
chr10	23801788	23801988
chr10	30072163	30072363
chr10	30092934	30093134
chr10	32702484	32702963
chr10	35417063	35417263
chr10	63701152	63701352
chr10	69914113	69914313
chr10	70426306	70426506
chr10	73592858	73593058
chr10	79110934	79111134
chr10	79115572	79115772
chr10	89870687	89870887
chr10	91275234	91275434
chr10	102831354	102831554
chr10	105523655	105523855
chr10	118706838	118707038
chr10	119122674	119122874
chr10	120489194	120489394
chr10	124233746	124234272
chr10	126136829	126137029
chr10	129789329	129789529
chr10	134479555	134479755
chr11	11610642	11610842
chr11	35954452	35954652
chr11	36382408	36382608
chr11	63974760	63974960
chr11	67251577	67251777
chr11	69065233	69065542
chr11	85775463	85775663
chr11	114168661	114168864
chr11	116857694	116857894
chr11	117693962	117694162
chr11	118013414	118013614
chr11	122057620	122057820
chr11	122648956	122649156
chr11	124750255	124750455
chr11	126175660	126175860
chr11	128065059	128065259
chr11	128370575	128370775
chr11	128373680	128373880
chr11	128382684	128382884
chr11	129781396	129781596
chr12	14553007	14553207
chr12	15102130	15102330
chr12	18849620	18849820
chr12	19249006	19249206
chr12	25205746	25205946
chr12	40602592	40602792
chr12	46616564	46616764
chr12	47479695	47479895
chr12	47665130	47665330
chr12	50606000	50606200
chr12	54359612	54361216
chr12	54807295	54807495
chr12	64310333	64310533
chr12	64680348	64680548
chr12	69660284	69660484
chr12	88693446	88693646
chr12	91332223	91332579
chr12	95038625	95038825
chr12	96177424	96177624
chr12	96591998	96592198
chr12	96839447	96840059
chr12	118744917	118745238
chr12	118796689	118797625
chr12	120111387	120111587
chr12	123509572	123509772
chr12	123762834	123763034
chr13	24845528	24845728
chr13	41187706	41188026
chr13	43565299	43565499
chr13	45285050	45285250
chr13	52197767	52197967
chr13	75900418	75900618
chr13	98039444	98039644
chr13	99562786	99562986
chr13	100033281	100033481
chr13	106756590	106756790
chr13	107160326	107160526
chr13	114016040	114016240
chr13	114831450	114831650
chr14	25142740	25142940
chr14	61790835	61791035
chr14	61809218	61809418
chr14	61946003	61946203
chr14	62128958	62129158
chr14	65758817	65759017
chr14	70478867	70479067
chr14	78055478	78055678
chr14	94679394	94679594
chr14	99720109	99720309
chr14	100613592	100613792
chr14	104400043	104400243
chr15	37173538	37173738
chr15	40201468	40201668
chr15	48042913	48043113
chr15	52774334	52774534
chr15	55543264	55543464
chr15	59640409	59640609
chr15	62149816	62150016
chr15	65176253	65176453
chr15	67366714	67366914
chr15	69339128	69339328
chr15	74243681	74243881
chr15	81591636	81591836
chr15	91381497	91381697
chr15	92611435	92611635
chr15	101860937	101861137
chr16	4464327	4464527
chr16	12895629	12895829
chr16	15991591	15991791
chr16	48157460	48157660
chr16	66551009	66551209
chr16	69511594	69511794
chr16	82226419	82226684
chr16	84133351	84133551
chr16	88767091	88767291
chr16	89381804	89382470
chr16	89431587	89431787
chr17	1547839	1548090
chr17	4615065	4615265
chr17	7287552	7287752
chr17	16323381	16323581
chr17	17753416	17753616
chr17	19207467	19207667
chr17	19273819	19274019
chr17	30399044	30399244
chr17	40426790	40426990
chr17	47465556	47465756
chr17	53025800	53026000
chr17	53497473	53497673
chr17	57451207	57451407
chr17	57861541	57861741
chr17	76380822	76381022
chr17	76815117	76815317
chr17	80545075	80545410
chr17	81006385	81006624
chr17	81041923	81042123
chr18	3467074	3467274
chr18	10057833	10058033
chr18	13052129	13052329
chr18	21154160	21154360
chr18	21418823	21419023
chr18	29673998	29674198
chr18	33196923	33197145
chr19	2082022	2082222
chr19	2085186	2085397
chr19	4327250	4327450
chr19	4328645	4328918
chr19	10105876	10106076
chr19	13540493	13540693
chr19	15411740	15411940
chr19	16253054	16253254
chr19	16436957	16437157
chr19	16676997	16677197
chr19	38974850	38975050
chr19	41700169	41700369
chr19	41827794	41827994
chr19	46313204	46313404
chr19	46684743	46684943
chr20	20351902	20352102
chr20	33115743	33115943
chr20	44406781	44406981
chr20	49114673	49114873
chr20	49140360	49140560
chr20	49158146	49158346
chr21	17106109	17106309
chr21	30009154	30009354
chr21	36418666	36418866
chr21	39661696	39661896
chr21	39832452	39832652
chr21	40017353	40017553
chr22	19752769	19752969
chr22	20906266	20906466
chr22	28536041	28536241
chr22	34199219	34199419
chr22	38029378	38029578
chr22	46367517	46367717
chr22	50154970	50155170

## Sheet: list of hypo promoter nodule
Hypo promoter KS
A2M
ABCC9
ABHD6
ABI3
ACAP1
ACSL5
ADAM12
ADAMTS5
ADAMTS9
ADAR
ADH1A
ADORA2A
ADORA3
ADRA1A
AFF3
AGAP2
AGO4
AHCYL2
AHR
AIF1
AIM2
AKAP12
AKR1C2
ALOX12-AS1
ALOX15
ALOX5AP
ALX3
AMBP
AMER2
AMICA1
ANGPTL6
ANKRD18A
ANKRD22
ANKRD44-IT1
ANO1
ANO2
ANO3
AOC1
AP1S1
AP5S1
APBB1IP
APELA
APLNR
APOBEC2
APOBEC3D
APOBR
APOC1P1
APOL3
AQP1
ARHGAP15
ARHGAP24
ARHGAP25
ARHGAP30
ARHGAP39
ARHGAP9
ARHGEF3
ARHGEF38
ARHGEF4
ARHGEF7
ARMC2-AS1
ARSB
ARSG
ASAP1
ASB2
ASNSD1
ATP10B
ATP13A1
ATP1A1
ATP6V1C2
AUP1
AZU1
B2M
B3GALT1
B3GNT7
BAALC
BAALC-AS1
BANP
BARX2
BATF
BATF2
BCAR3
BCL2A1
BCL2L10
BLVRA
BMP7
BMPR1B
BRDT
BREA2
BRF1
BST2
BTLA
BTN3A2
BTNL2
BTNL8
BZRAP1
BZRAP1-AS1
C10orf128
C10orf25
C12orf65
C14orf177
C15orf53
C15orf54
C16orf47
C16orf54
C17orf62
C17orf77
C17orf82
C18orf54
C19orf35
C19orf45
C19orf84
C1orf162
C20orf197
C20orf78
C22orf34
C2CD4B
C3AR1
C3orf58
C7
CA2
CALCR
CALD1
CAMKMT
CAPN14
CAPZA3
CARD16
CARD8
CARM1
CASC14
CASKIN2
CASP8
CASQ2
CASS4
CBX3P2
CCDC141
CCDC167
CCDC88B
CCL23
CCL24
CCL25
CCL3
CCL5
CCR1
CCR4
CCR5
CCR7
CCRL2
CD101
CD160
CD177
CD1C
CD226
CD247
CD27
CD28
CD300A
CD300E
CD300LB
CD300LD
CD300LF
CD34
CD36
CD37
CD3D
CD3E
CD3G
CD48
CD5
CD52
CD53
CD6
CD69
CD70
CD72
CD74
CD79B
CD80
CD81-AS1
CD86
CD93
CDC27
CDH17
CDH3
CDH4
CDIPT
CEBPE
CECR1
CELF2
CELF3
CELF6
CENPM
CEP128
CEP85L
CEP97
CES5A
CFH
CFHR5
CFLAR
CHAMP1
CHN2
CHODL-AS1
CHRM1
CHRM3-AS2
CHRNA1
CHRNA3
CIDEB
CLASP2
CLCA1
CLDN16
CLDN7
CLDN9
CLEC12A
CLEC2D
CLEC4C
CLEC4E
CLEC6A
CLECL1
CLIC1
CLIC3
CLN3
CLNK
CMTM3
CMTM5
CMTM7
CNOT2
CNR2
CNTN6
COL12A1
COL16A1
COL18A1-AS2
COL1A1
COL26A1
COL2A1
COL4A2
COL6A5
COLQ
COMMD7
CORO2B
CPVL
CRAT
CRCT1
CREB1
CRISPLD1
CSF2
CSF2RB
CST3
CTIF
CTNNA1
CTU2
CYB561D1
CYBA
CYR61
CYS1
CYTH4
CYTIP
DAOA
DAPK2
DCAF16
DDAH1
DEFA6
DEFB135
DENND1B
DENND1C
DHRS7
DHRS7B
DKFZP434H168
DLC1
DLEC1
DLG2
DLX1
DLX4
DLX5
DLX6
DLX6-AS1
DNAH1
DNM3OS
DNMT3B
DOCK1
DOCK10
DOCK8
DOK2
DPEP3
DQX1
DSG4
DYNAP
DYNLT1
E2F1
E2F6
ECE1
EFHD2
EIF3IP1
EIF4E
ELAVL2
ELF1
ELOVL2-AS1
EMBP1
EMILIN1
EMR3
EMX2OS
EN1
ENPP5
EPB41L4B
EPN2-AS1
EPOR
EPPIN
EPYC
ERC2-IT1
ERG
ERV3-1
ESR1
ETS1
EVI2A
EVI2B
EVL
EVX1
EXOC3L2
EXOC6
EXT1
F12
F2RL3
FAIM3
FAM107B
FAM124B
FAM133CP
FAM170B
FAM214A
FAM219A
FAM50B
FAM53B-AS1
FAM65B
FAM65C
FAM78A
FAP
FASLG
FBXL20
FBXL3
FBXO17
FBXO44
FCAMR
FCGRT
FCHO1
FCRL1
FCRL3
FCRL6
FERMT3
FGD3
FGF19
FGGY
FILIP1
FLG
FLG2
FLJ12825
FLJ38122
FLJ42351
FNDC3B
FNDC4
FOXB2
FOXJ1
FOXN2
FSD1
FUS
FYB
FYN
GABBR1
GAL
GALNT6
GAST
GATA3
GATA3-AS1
GBP4
GCKR
GCSAML
GDAP1
GDF6
GDI2
GFRA4
GGA1
GHR
GIMAP1
GIMAP4
GIMAP5
GIMAP6
GIMAP7
GIMAP8
GLIPR1
GLRX
GM140
GMFG
GNA15
GNAS
GNGT2
GP5
GPC5-AS1
GPD2
GPHA2
GPM6A
GPR1
GPR128
GPR132
GPR155
GPR156
GPR171
GPR18
GPR183
GPR35
GPR84
GPR89B
GPX5
GRAMD1A
GRAP2
GREM2
GRIA4
GRID1-AS1
GRIK2
GS1-279B7.1
GSTO2
GTF2A1L
GUCY1B3
GUCY2D
GZMA
GZMB
H6PD
HAUS5
HAVCR2
HBBP1
HCAR1
HCG26
HCLS1
HDAC9
HELZ2
HEMGN
HIC1
HK3
HLA-DMA
HLA-DMB
HLA-DPA1
HLA-DPB1
HLA-DPB2
HLA-DRA
HLA-F-AS1
HMCES
HMHA1
HMHB1
HNMT
HOTAIR
HOXA-AS3
HOXA4
HOXB2
HOXC-AS1
HOXC11
HOXC13
HOXC4
HOXC5
HOXC6
HOXC8
HPCAL1
HS1BP3-IT1
HS3ST3A1
HSBP1
HSBP1L1
HSD11B1
HSD17B2
HSD3B1
HSP90B2P
HTRA1
ICAM3
ICAM4
ICAM5
ICOS
IDO1
IFFO1
IFI16
IFNG
IFRD1
IFT74
IFT80
IGFBP7-AS1
IGFL1
IGFLR1
IGSF11
IKZF1
IKZF3
IL10
IL12RB1
IL16
IL17RA
IL18RAP
IL19
IL1R1
IL1RN
IL23R
IL25
IL27
IL2RB
IL32
IL6
IL7R
IMMT
INHBA-AS1
INPP5B
INPP5D
IPO11
IPO5
IQCA1
IRX3
ISG20
ITGA4
ITGAL
ITGAM
ITGB1
ITGB2
ITGB2-AS1
ITGB7
ITIH3
ITK
ITPK1-AS1
ITPKB-IT1
IZUMO4
JAK3
JAM2
KANK2
KANSL1
KARS
KCNA2
KCNE4
KCNK17
KCTD14
KHNYN
KIF21B
KIF2B
KIR3DX1
KL
KLF7
KLHL3
KLHL41
KLHL6
KLRD1
KLRG1
KLRK1
KRI1
KRT1
KRT19
KRT3
KRT36
KRT38
KRT40
KRT76
KRT78
KRT79
KRT81
KRT85
KRTAP12-1
KRTAP12-3
KRTAP12-4
KRTAP13-2
KRTAP15-1
KRTAP19-6
KRTAP19-8
KRTAP20-1
KRTAP21-1
KRTAP22-2
KRTAP24-1
KRTAP6-1
KRTAP6-3
KRTAP9-6
LAIR1
LAMA2
LAMB1
LAPTM5
LARGE-AS1
LAT
LAX1
LCE2A
LCE2D
LCE4A
LCE5A
LCE6A
LCK
LCP1
LCP2
LDHC
LDLRAD4
LEFTY2
LGALS12
LGALS14
LILRA1
LILRB2
LINC-PINT
LINC00211
LINC00299
LINC00313
LINC00382
LINC00426
LINC00460
LINC00534
LINC00544
LINC00548
LINC00628
LINC00687
LINC00702
LINC00838
LINC00840
LINC00861
LINC00941
LINC00968
LINC00996
LINC01010
LINC01013
LINC01019
LINC01048
LINC01118
LINC01119
LINC01133
LINC01137
LINC01146
LINC01164
LINC01167
LINC01168
LINC01215
LINC01246
LINC01252
LINC01279
LINC01333
LINC01340
LINC01366
LINC01387
LINC01411
LINC01423
LINC01477
LINC01491
LINC01493
LINC01506
LINC01561
LMAN2L
LMO2
LMX1A
LMX1B
LOC100130476
LOC100131289
LOC100132891
LOC100190940
LOC100287036
LOC100287592
LOC100288181
LOC100505530
LOC100505622
LOC100505841
LOC100505878
LOC100506159
LOC100506258
LOC100506281
LOC100506499
LOC100506585
LOC100506606
LOC100506801
LOC100507073
LOC100507195
LOC100507600
LOC100996286
LOC100996342
LOC101926892
LOC101926963
LOC101927018
LOC101927166
LOC101927171
LOC101927230
LOC101927272
LOC101927285
LOC101927334
LOC101927482
LOC101927588
LOC101927640
LOC101927851
LOC101927876
LOC101927907
LOC101927934
LOC101927973
LOC101928009
LOC101928303
LOC101928435
LOC101928471
LOC101928505
LOC101928523
LOC101928590
LOC101928674
LOC101928791
LOC101928823
LOC101929080
LOC101929241
LOC101929268
LOC101929282
LOC101929297
LOC101929517
LOC101929631
LOC101929715
LOC102467079
LOC102467080
LOC102467225
LOC102546229
LOC102577424
LOC102723927
LOC102724020
LOC102724163
LOC102724297
LOC102724467
LOC102724804
LOC102724957
LOC103312105
LOC145845
LOC153684
LOC157273
LOC158434
LOC285766
LOC285768
LOC285804
LOC286359
LOC374443
LOC389705
LOC400548
LOC414300
LOC439933
LOC440602
LOC606724
LOC653653
LOX
LPPR3
LRMP
LRP8
LRRC27
LRRC32
LRRC7
LRRC70
LRRTM2
LSP1
LTA
LTB4R
LUZP6
LY86
LY96
LYL1
LYVE1
LZTFL1
MACC1
MACROD2
MAFB
MAP2
MARCO
MCM3
MCTP1
MCTS2P
MDM4
MEF2C
MEIS1-AS3
MGAT1
MGAT4A
MIA2
MICAL1
MIR1204
MIR1207
MIR122
MIR1245A
MIR1245B
MIR1305
MIR138-1
MIR142
MIR143HG
MIR145
MIR1469
MIR1471
MIR1537
MIR155
MIR15B
MIR16-2
MIR183
MIR1972-1
MIR1972-2
MIR198
MIR199A2
MIR217
MIR3155A
MIR3170
MIR3675
MIR3692
MIR4270
MIR4327
MIR4432
MIR4437
MIR4482
MIR4500HG
MIR4513
MIR4526
MIR4645
MIR4729
MIR4752
MIR4778
MIR4779
MIR4796
MIR5003
MIR5094
MIR5191
MIR548AS
MIR5680
MIR595
MIR6070
MIR609
MIR6090
MIR615
MIR628
MIR648
MIR650
MIR6732
MIR6766
MIR6876
MIR6891
MIR7848
MIR7852
MIR7853
MIR8052
MIR8061
MIR938
MIR96
MIRLET7A1
MIRLET7D
MIRLET7F1
MKL1
MKLN1
MLC1
MLLT11
MLPH
MMP2
MMRN1
MNDA
MNS1
MNX1
MOV10L1
MPO
MPP6
MRPL35
MRPL47
MS4A1
MS4A7
MSH5
MT1B
MTG1
MTPN
MTUS1
MUC16
MUC4
MUSTN1
MX2
MYBPH
MYF5
MYLK-AS2
MYLK4
MYO15B
MYO1G
MZB1
NANOGNB
NAP1L1
NAPSB
NAT9
NCALD
NCKAP1L
NCR3
NDFIP2
NDUFC2
NDUFS2
NEDD9
NEK6
NEURL1-AS1
NEUROG1
NFAM1
NFATC4
NINJ2
NKG7
NKX1-2
NLRC3
NLRC4
NLRP12
NLRP3
NMNAT2
NMT2
NOS1AP
NOX4
NPAT
NPHP4
NPR3
NR2F2
NR2F2-AS1
NREP
NRG1
NRG1-IT3
NSMF
NTM
NUAK1
NUB1
NUDT19
OAS1
OAS2
OCSTAMP
ODC1
OLFML2B
OPCML
OPRM1
OR10AG1
OR10G7
OR10X1
OR13J1
OR1F2P
OR2B2
OR2T27
OR2T29
OR2T5
OR2V2
OR52M1
OR6Q1
OR7E47P
OR8B12
OSBPL10-AS1
OSBPL9
OSM
OST4
P2RY11
P2RY14
PADI1
PARP15
PARVG
PATE3
PBX2
PCED1B-AS1
PCK1
PDCD1
PDCD4
PDE1A
PDE1C
PDE4A
PDE4B
PDE6G
PDYN
PEX11G
PFKFB4
PGS1
PHACTR2
PIK3CD
PIK3CD-AS1
PIK3CG
PIK3R6
PIPOX
PKIG
PKN1
PKNOX2-AS1
PLA2G4E
PLAC8
PLCB2
PLCE1-AS2
PLCG1-AS1
PLCZ1
PLD1
PLEC
PLEK
PLEKHO2
PMFBP1
PNOC
POLR2E
POMC
POU2F2
POU6F2
PPAN
PPAP2A
PPAP2B
PPCDC
PPP1CA
PPP1R16B
PPP1R17
PPP2R4
PRAM1
PRCD
PRDM1
PRDM11
PRDX1
PRF1
PRIMA1
PRLR
PROB1
PRORSD1P
PROX1
PRPH
PRR16
PRR5
PRR5L
PRRC2A
PRSS3
PSENEN
PSMB8
PSMB8-AS1
PTGDR
PTGER1
PTK2
PTPN22
PTPN7
PTPRB
PTPRC
PTPRCAP
PVT1
PXN
PYHIN1
RAP1A
RARB
RARRES3
RASA2
RASGRF2
RASSF1
RASSF2
RCSD1
RD3
RERE
REREP3
RFFL
RFX8
RGS1
RGS3
RHBDF2
RHO
RHOH
RIIAD1
RIMBP2
RIPK1
RMDN2-AS1
RNASE1
RNASEH2B-AS1
RNF103
RNF138P1
RNF150
RNF166
RNF213
RNF39
RNU6-2
ROBO4
RPL13AP3
RPL23AP32
RPS27A
RPS6KA2
RPS6KA2-IT1
RRM2
RRN3P2
RRP12
RTP4
RUNX1
RUNX2
RUNX3
RYR3
S1PR4
SAA4
SACS
SAMD3
SAPCD1
SART1
SBF2
SCARNA9
SCG3
SCIMP
SCIN
SCML4
SCN1A
SCN7A
SCNM1
SCOC
SCPEP1
SDC4P
SEC14L1
SEL1L2
SELL
SELPLG
SEMA4D
SEMA6D
SEMG1
SENCR
SERPINA2
SERPINA4
SERPINA5
SERPINA9
SERPINB6
SERPINB7
SERPINB9P1
SETDB2
SFRP1
SFTPA1
SH2B3
SH2D1B
SH2D2A
SH2D3C
SH3BP2
SHANK2-AS3
SHANK3
SIGIRR
SIGLEC12
SIGLEC17P
SIGLEC9
SIPA1
SIRPB1
SIRPB2
SIRPG-AS1
SIT1
SIX2
SLA
SLA2
SLAMF1
SLAMF6
SLAMF8
SLAMF9
SLC12A5
SLC12A8
SLC1A2
SLC20A1
SLC22A18
SLC22A2
SLC25A18
SLC25A47
SLC30A8
SLC35G2
SLC39A8
SLC5A4
SLC7A7
SLC9A5
SLCO1B1
SMAP2
SMG6
SMIM7
SMYD4
SNORA70B
SNORA80B
SNORD105
SNORD105B
SNORD113-1
SNORD113-2
SNORD17
SNORD93
SNX20
SOAT2
SOCS6
SOD3
SORBS1
SOWAHC
SP110
SP140
SP140L
SP8
SPATA13
SPATA13-AS1
SPATA42
SPATC1
SPG11
SPG21
SPINT3
SPN
SPNS3
SPRR1A
SPRR2C
SPRR2F
SPRR2G
SPRR3
SPRR4
SPTA1
SST
ST3GAL4
ST3GAL4-AS1
ST3GAL6
ST7L
STAP1
STAR
STARD13
STAT1
STAT3
STAT4
STBD1
STK4-AS1
STON1
SUCLG2
SUCNR1
SUN2
SYNJ2
SYT16
SYTL3
TACC2
TAGAP
TAP1
TAP2
TBC1D10C
TBC1D2B
TBX3
TBX4
TC2N
TCF4
TCF7L2
TCHH
TCN1
TCTEX1D2
TENM4
TESPA1
TEX26
TEX26-AS1
TEX33
TEX36-AS1
TFAP2A
TFPI
TG
TGFBR2
TGM6
THAP4
THAP9-AS1
THEMIS
TIE1
TIGIT
TJP1
TLR1
TLR4
TM4SF19
TM9SF2
TMC6
TMC8
TMEM117
TMEM140
TMEM144
TMEM150B
TMEM156
TMEM200C
TMEM37
TMEM63B
TMEM71
TMEM9B
TMIGD2
TNF
TNFAIP8
TNFAIP8L2
TNFRSF10C
TNFRSF10D
TNFRSF18
TNFRSF25
TNFRSF9
TNFSF4
TNFSF8
TNN
TOB1
TOR4A
TOX3
TP63
TPM3
TPPP3
TRAF1
TRAF3IP3
TRAT1
TREM2
TREML2
TRIM10
TRIM15
TRIM40
TRIM67
TRIM69
TRPC2
TRPM2
TSPAN31
TSPAN32
TTC16
TTC23
TTLL10
TUBA3E
TUBB6
TUSC7
TXNDC11
UBE2I
UBXN11
UNC13C
UPP1
USP24
USP50
UTS2R
UXS1
VAC14
VAMP5
VARS
VGLL4
VNN1
VNN2
VOPP1
VSTM1
VWA2
WBP11P1
WDFY4
WDR81
WDR82
WFDC12
WFDC6
WIPF1
WNT1
WNT10B
WNT5A
WNT6
WRB
XXYLT1-AS2
YES1
YWHAEP7
ZAN
ZAP70
ZBED2
ZBP1
ZBTB32
ZCCHC14
ZFHX3
ZFHX4
ZFHX4-AS1
ZMYND15
ZNF101
ZNF117
ZNF212
ZNF22
ZNF366
ZNF414
ZNF431
ZNF438
ZNF672
ZNF683
ZNF705B
ZNF705E
ZNF714
ZNF718
ZP4
ZSCAN2
ZSWIM6
