# Supplementary material for: Global CpG DNA Methylation Footprint in Kaposi’s Sarcoma
Source: Front Cell Infect Microbiol. 2021 Jul 9;11:666143. doi: 10.3389/fcimb.2021.666143 (PMC8300563; doi:10.3389/fcimb.2021.666143)
Supplement: Supplementary Table 4 — Biological processes associated with differentially methylated regulatory elements. [file Table_4.xlsx]

## Sheet: GO_hypo_KS_PEL
Category	Term	Count	%	PValue	Genes	List Total	Pop Hits	Pop Total	Fold Enrichment	Bonferroni	Benjamini	FDR
UP_KEYWORDS	Glycoprotein	88	37.4468	5.31998e-08	2191, 25903, 50507, 7087, 6352, 6035, 5267, 63982, 2550, 29106, 3560, 2823, 5618, 1136, 1015, 89858, 1179, 284415, 358, 81697, 84561, 3676, 8807, 2825, 6947, 6484, 5551, 10580, 1471, 1303, 3569, 566, 22918, 5104, 5787, 923, 80031, 1307, 10666, 4978, 23704, 6693, 8793, 8876, 59342, 2099, 1241, 57484, 2131, 145270, 63923, 1280, 284759, 56833, 59307, 340706, 1234, 1277, 57126, 54538, 11320, 6404, 55…	232	4551	20581	1.71536	1.42043e-05	1.42044e-05	1.36192e-05
UP_KEYWORDS	Disulfide bond	69	29.3617	9.08535e-07	2191, 25903, 50507, 7087, 6352, 6035, 6750, 8292, 2550, 3560, 114548, 2823, 5618, 613209, 1136, 89858, 284415, 81697, 3676, 8807, 2825, 6947, 6484, 5551, 1671, 1471, 1303, 3569, 566, 22918, 923, 80031, 10666, 4978, 8793, 2131, 145270, 63923, 1280, 284759, 56833, 59307, 340706, 1234, 1277, 54538, 658, 6404, 11126, 4988, 219858, 83690, 343413, 5173, 64388, 5133, 11096, 4245, 29933, 10326, 2898, 148…	232	3434	20581	1.78249	0.00024255	0.000100963	9.68038e-05
UP_KEYWORDS	Polymorphism	171	72.766	1.13442e-06	25903, 5142, 23209, 6352, 3880, 6750, 11186, 63982, 2550, 2823, 2820, 89858, 1179, 79776, 358, 26278, 79899, 81697, 57509, 84561, 8807, 2825, 5551, 3891, 7456, 79083, 261734, 9590, 1471, 1745, 80352, 246, 644, 800, 22918, 5269, 283598, 55615, 5787, 923, 10666, 728299, 23704, 8793, 1241, 145270, 63923, 3937, 56833, 59307, 123036, 1234, 57126, 54538, 196374, 658, 6404, 55107, 4988, 91662, 90332, 95…	232	12043	20581	1.25962	0.000302844	0.000100963	9.68038e-05
UP_SEQ_FEATURE	glycosylation site:N-linked (GlcNAc...)	81	34.4681	1.2441e-06	2191, 25903, 50507, 7087, 6035, 5267, 63982, 2550, 3560, 2823, 5618, 1136, 1015, 89858, 1179, 284415, 358, 81697, 84561, 3676, 8807, 2825, 6947, 6484, 5551, 1303, 3569, 566, 22918, 5104, 5787, 923, 80031, 1307, 10666, 4978, 23704, 6693, 8793, 8876, 59342, 1241, 57484, 2131, 145270, 63923, 1280, 284759, 56833, 59307, 340706, 1277, 57126, 54538, 11320, 6404, 55107, 11126, 8708, 4988, 219858, 343413…	232	4234	20063	1.65441	0.000993544	0.000995281	0.000985328
INTERPRO	IPR006703:AIG1	5	2.12766	2.03174e-06	170575, 55303, 155038, 168537, 55340	214	9	18559	48.1802	0.00096055	0.000961011	0.000952884
UP_SEQ_FEATURE	sequence variant	177	75.3191	2.89233e-06	25903, 5142, 23209, 6352, 3880, 6750, 11186, 63982, 2550, 2823, 2820, 89858, 1179, 79776, 358, 26278, 79899, 81697, 57509, 84561, 8807, 2825, 9235, 5551, 3891, 7456, 79083, 261734, 9590, 1471, 1745, 80352, 246, 644, 22918, 5269, 283598, 55615, 5787, 923, 4978, 10666, 728299, 11281, 23704, 8793, 1241, 145270, 63923, 56833, 59307, 123036, 1234, 57126, 54538, 196374, 658, 6404, 55107, 4988, 6926, 91…	232	12443	20063	1.23014	0.00230831	0.00105472	0.00104417
UP_SEQ_FEATURE	signal peptide	67	28.5106	3.9552e-06	25903, 7087, 6352, 6035, 6750, 5267, 8292, 2550, 29106, 3560, 5618, 613209, 1136, 1015, 89858, 1179, 284415, 3676, 8807, 6947, 9235, 5551, 1671, 1471, 1303, 3569, 566, 22918, 5104, 5787, 923, 80031, 1307, 10666, 4978, 6693, 8793, 8876, 59342, 57484, 145270, 63923, 1280, 284759, 56833, 340706, 1277, 57126, 54538, 658, 6404, 11126, 83690, 343413, 5173, 64388, 5133, 11096, 10326, 2898, 146723, 3908,…	232	3346	20063	1.73164	0.00315523	0.00105472	0.00104417
GOTERM_BP_DIRECT	GO:0007155~cell adhesion	19	8.08511	1.14651e-05	2191, 7087, 9235, 10580, 1495, 9891, 1303, 1015, 89858, 3908, 1277, 1001, 3676, 6404, 50863, 948, 10666, 4978, 1307	203	459	16792	3.42411	0.0150991	0.0152142	0.0152142
UP_SEQ_FEATURE	disulfide bond	58	24.6809	3.03503e-05	2191, 25903, 7087, 6352, 6035, 6750, 8292, 2550, 3560, 5618, 613209, 1136, 89858, 284415, 81697, 3676, 8807, 2825, 6947, 6484, 5551, 1671, 1471, 3569, 566, 22918, 923, 80031, 10666, 4978, 8793, 63923, 284759, 56833, 59307, 340706, 1234, 1277, 54538, 6404, 11126, 4988, 219858, 83690, 343413, 64388, 5133, 11096, 29933, 10326, 148, 56244, 3908, 4313, 50863, 948, 79908, 3824	232	2917	20063	1.71949	0.0239586	0.00607006	0.00600936
UP_KEYWORDS	Cell adhesion	18	7.65957	3.14838e-05	2191, 7087, 1495, 9891, 1303, 1015, 89858, 3908, 1001, 22918, 923, 3676, 6404, 50863, 948, 10666, 4978, 1307	232	479	20581	3.33362	0.00837108	0.00210155	0.00201497
GOTERM_MF_DIRECT	GO:0005198~structural molecule activity	13	5.53191	5.82308e-05	4133, 3880, 3891, 1495, 261734, 338785, 3848, 254910, 54544, 9080, 3908, 196374, 643803	209	247	16881	4.25107	0.0215435	0.0217783	0.0217783
UP_KEYWORDS	Signal	72	30.6383	9.25654e-05	25903, 7087, 6352, 6035, 6750, 5267, 8292, 2550, 29106, 3560, 5618, 613209, 1136, 1015, 89858, 1179, 284415, 3676, 8807, 6947, 9235, 6484, 5551, 1671, 1471, 1303, 3569, 566, 22918, 5104, 5787, 923, 80031, 1307, 10666, 4978, 6693, 8793, 8876, 59342, 57484, 145270, 63923, 1280, 284759, 56833, 340706, 1234, 1277, 57126, 54538, 658, 6404, 11126, 83690, 343413, 5173, 64388, 5133, 11096, 1495, 10326, 2…	232	4160	20581	1.53539	0.0244132	0.00494299	0.00473935
GOTERM_BP_DIRECT	GO:0050900~leukocyte migration	9	3.82979	0.000113899	5142, 6693, 9046, 2302, 1277, 57126, 7525, 3676, 6404	203	122	16792	6.10224	0.140284	0.0755722	0.0755722
UP_SEQ_FEATURE	topological domain:Extracellular	53	22.5532	0.000244014	2191, 50507, 7087, 63982, 2550, 3560, 2823, 5618, 1136, 1015, 89858, 23120, 358, 81697, 3676, 8807, 2825, 22918, 5787, 923, 80031, 10666, 6693, 8793, 1241, 57484, 145270, 55340, 284759, 80342, 56833, 59307, 1234, 9080, 658, 8987, 6404, 55107, 4988, 219858, 343413, 6582, 5133, 29933, 10326, 170575, 2898, 148, 56244, 1001, 948, 79908, 3824	232	2787	20063	1.64455	0.177158	0.0325369	0.0322115
UP_SEQ_FEATURE	domain:Ig-like V-type 1	5	2.12766	0.000244026	10326, 284759, 89858, 56244, 79908	232	27	20063	16.0145	0.177166	0.0325369	0.0322115
INTERPRO	IPR013783:Immunoglobulin-like fold	25	10.6383	0.000249169	23504, 7087, 64778, 3560, 63923, 5618, 284759, 59307, 89858, 284415, 54538, 8987, 11126, 8807, 343413, 5133, 10326, 1303, 56244, 5787, 343641, 50863, 79908, 10666, 4978	214	951	18559	2.27982	0.11119	0.0589285	0.0584302
UP_KEYWORDS	Keratin	9	3.82979	0.000341955	728299, 3848, 3891, 3880, 386683, 196374, 337968, 643803, 338785	232	153	20581	5.21831	0.0872723	0.015217	0.0145901
UP_KEYWORDS	Immunoglobulin domain	17	7.23404	0.000473397	7087, 5133, 10326, 284759, 56833, 59307, 89858, 56244, 284415, 54538, 50863, 11126, 8807, 79908, 10666, 4978, 343413	232	546	20581	2.76207	0.118761	0.0180567	0.0173128
UP_SEQ_FEATURE	topological domain:Cytoplasmic	61	25.9574	0.000504422	2191, 50507, 7087, 63982, 2550, 3560, 2823, 5618, 1136, 1015, 89858, 23120, 358, 81697, 3676, 8807, 2825, 6484, 22918, 5787, 923, 80031, 10666, 23704, 6693, 8793, 1241, 57484, 2131, 145270, 55340, 284759, 80342, 56833, 59307, 1234, 9080, 11320, 658, 10791, 8987, 6404, 55107, 8708, 4988, 219858, 343413, 6582, 5133, 4245, 29933, 64108, 10326, 170575, 2898, 148, 56244, 1001, 948, 79908, 3824	232	3456	20063	1.52638	0.331778	0.0576483	0.0570718
UP_KEYWORDS	Secreted	39	16.5957	0.000631498	2191, 25903, 6352, 6035, 6750, 5267, 59342, 2550, 29106, 63923, 114548, 1280, 5618, 613209, 340706, 1179, 284415, 1277, 11320, 6947, 83690, 5173, 9235, 6484, 64388, 11096, 5551, 1671, 1471, 3603, 2778, 1303, 3569, 3908, 146723, 5104, 4313, 923, 1307	232	1965	20581	1.76068	0.155207	0.0210762	0.0202079
GOTERM_BP_DIRECT	GO:0006968~cellular defense response	6	2.55319	0.000889608	6693, 5551, 1234, 4046, 11126, 3702	203	62	16792	8.00509	0.693039	0.359198	0.359198
GOTERM_CC_DIRECT	GO:0009897~external side of plasma membrane	10	4.25532	0.00119689	3569, 6693, 5133, 1234, 5104, 3560, 948, 10666, 3824, 343413	222	213	18224	3.85399	0.256071	0.226887	0.226887
GOTERM_BP_DIRECT	GO:0006952~defense response	6	2.55319	0.00126495	2625, 9235, 4600, 1053, 1471, 114548	203	67	16792	7.40769	0.813562	0.359198	0.359198
GOTERM_BP_DIRECT	GO:0001501~skeletal system development	8	3.40426	0.00135342	2019, 1303, 1277, 8626, 658, 2131, 1280, 6926	203	137	16792	4.83032	0.834238	0.359198	0.359198
INTERPRO	IPR017970:Homeobox, conserved site	9	3.82979	0.00161166	1745, 2019, 3229, 2128, 3227, 79776, 3224, 1748, 4009	214	190	18559	4.10799	0.533703	0.254106	0.251957
UP_SEQ_FEATURE	DNA-binding region:Homeobox	9	3.82979	0.0017081	1745, 2019, 3229, 2128, 11281, 3227, 3224, 1748, 4009	232	191	20063	4.0749	0.744859	0.151831	0.150313
GOTERM_CC_DIRECT	GO:0005615~extracellular space	30	12.766	0.00183714	2191, 6352, 6693, 6750, 5267, 8292, 1280, 340706, 1179, 284415, 1277, 196374, 57509, 6947, 9235, 64388, 11096, 3891, 1671, 1471, 112616, 3848, 3603, 1303, 3569, 566, 5269, 5104, 4313, 948	222	1347	18224	1.82829	0.365039	0.226887	0.226887
UP_KEYWORDS	Membrane	107	45.5319	0.00184345	23209, 63982, 2550, 3241, 2823, 2820, 89858, 1179, 358, 81697, 57509, 84561, 60592, 8807, 2825, 6484, 5551, 9590, 246, 1740, 22918, 5787, 923, 4978, 10666, 23704, 8793, 1241, 145270, 57484, 55340, 56833, 59307, 9080, 1234, 57126, 11320, 658, 6404, 55107, 8708, 4988, 4245, 1495, 221178, 29933, 64108, 170575, 1124, 148, 151556, 1001, 50863, 948, 3824, 50507, 2191, 7087, 645369, 29106, 3560, 5618, 1…	232	7494	20581	1.26663	0.388998	0.0546889	0.0524358
GOTERM_MF_DIRECT	GO:0005178~integrin binding	7	2.97872	0.00190519	2191, 7087, 1015, 11096, 63923, 10666, 1307	209	105	16881	5.38469	0.509936	0.35627	0.35627
KEGG_PATHWAY	hsa04514:Cell adhesion molecules (CAMs)	8	3.40426	0.00262893	6693, 5133, 9080, 1001, 923, 3676, 6404, 10666	92	142	6879	4.21249	0.352311	0.221417	0.221417
KEGG_PATHWAY	hsa05146:Amoebiasis	7	2.97872	0.00268385	2778, 3569, 3908, 1277, 5269, 1280, 2769	92	106	6879	4.93776	0.358169	0.221417	0.221417
INTERPRO	IPR001356:Homeodomain	10	4.25532	0.00287807	1745, 2019, 3229, 2128, 11281, 3227, 79776, 3224, 1748, 4009	214	256	18559	3.38767	0.744182	0.32835	0.325574
UP_KEYWORDS	Homeobox	10	4.25532	0.00292175	1745, 2019, 3229, 2128, 11281, 3227, 79776, 3224, 1748, 4009	232	262	20581	3.38592	0.542166	0.0780107	0.0747968
INTERPRO	IPR020479:Homeodomain, metazoa	6	2.55319	0.00416512	1745, 2019, 2128, 3227, 3224, 1748	214	92	18559	5.65593	0.86113	0.32835	0.325574
SMART	SM00060:FN3	8	3.40426	0.00419746	23504, 5618, 1303, 54538, 5787, 3560, 64778, 63923	137	150	10057	3.91513	0.406418	0.420831	0.417438
UP_SEQ_FEATURE	domain:Fibronectin type-III 2	7	2.97872	0.00444991	23504, 5618, 1303, 54538, 5787, 64778, 63923	232	133	20063	4.5515	0.971658	0.263701	0.261064
UP_SEQ_FEATURE	domain:Fibronectin type-III 1	7	2.97872	0.00461477	23504, 5618, 1303, 54538, 5787, 64778, 63923	232	134	20063	4.51753	0.975171	0.263701	0.261064
GOTERM_CC_DIRECT	GO:0005886~plasma membrane	68	28.9362	0.00468595	2191, 7087, 23209, 3880, 11186, 63982, 8292, 2550, 3560, 2823, 5618, 1136, 1015, 1179, 2983, 23120, 358, 81697, 57509, 3676, 8807, 5551, 10580, 9590, 3848, 3603, 246, 1740, 22918, 800, 7525, 80031, 10666, 4978, 23504, 6693, 8793, 8876, 2099, 1241, 145270, 123036, 1234, 9080, 57126, 658, 10791, 6404, 55107, 11126, 4988, 219858, 2769, 5173, 6582, 5133, 4046, 1495, 29933, 10326, 2778, 2898, 148, 100…	222	4121	18224	1.35456	0.686561	0.38581	0.38581
GOTERM_BP_DIRECT	GO:0070301~cellular response to hydrogen peroxide	5	2.12766	0.00488252	3569, 2113, 358, 1471, 8807	203	57	16792	7.25607	0.998489	0.691773	0.691773
UP_KEYWORDS	Collagen	6	2.55319	0.00497363	1303, 1277, 8292, 948, 1280, 1307	232	98	20581	5.4313	0.735859	0.120724	0.11575
INTERPRO	IPR003599:Immunoglobulin subtype	14	5.95745	0.00499711	7087, 5133, 10326, 284759, 89858, 56244, 284415, 54538, 50863, 8807, 79908, 10666, 4978, 343413	214	497	18559	2.44294	0.906478	0.329128	0.326345
GOTERM_MF_DIRECT	GO:0043565~sequence-specific DNA binding	15	6.38298	0.00504249	7026, 2078, 2099, 114548, 1745, 473, 3229, 2128, 79776, 2113, 3224, 8626, 1748, 6934, 6926	209	518	16881	2.33891	0.849028	0.628631	0.628631
UP_SEQ_FEATURE	domain:SH2	6	2.55319	0.00506869	3937, 6452, 1124, 117157, 7525, 3702	232	96	20063	5.4049	0.982754	0.27033	0.267627
INTERPRO	IPR009057:Homeodomain-like	11	4.68085	0.00559008	1745, 473, 2019, 3229, 2128, 11281, 3227, 79776, 3224, 1748, 4009	214	336	18559	2.83919	0.929457	0.329128	0.326345
UP_KEYWORDS	GTP-binding	11	4.68085	0.00562567	115361, 2778, 170575, 55303, 2983, 155038, 168537, 5105, 4600, 55340, 2769	232	343	20581	2.84497	0.77827	0.125171	0.120014
KEGG_PATHWAY	hsa04512:ECM-receptor interaction	6	2.55319	0.00571588	3908, 1277, 3676, 63923, 948, 1280	92	87	6879	5.15667	0.611641	0.314374	0.314374
GOTERM_BP_DIRECT	GO:0050776~regulation of immune response	8	3.40426	0.00582624	7087, 117157, 1277, 3676, 11126, 1280, 10666, 3824	203	178	16792	3.71772	0.999571	0.691773	0.691773
GOTERM_BP_DIRECT	GO:0042102~positive regulation of T cell proliferation	5	2.12766	0.00586177	3569, 6352, 6693, 56244, 923	203	60	16792	6.89327	0.999591	0.691773	0.691773
GOTERM_BP_DIRECT	GO:0007166~cell surface receptor signaling pathway	10	4.25532	0.00603772	5618, 10326, 6693, 9046, 1234, 6750, 11126, 948, 8807, 3824	203	274	16792	3.01895	0.999677	0.691773	0.691773
GOTERM_BP_DIRECT	GO:0006954~inflammatory response	12	5.10638	0.00625567	50507, 3569, 6352, 8793, 246, 1234, 566, 8876, 658, 1241, 114548, 8807	203	379	16792	2.61908	0.999758	0.691773	0.691773
INTERPRO	IPR018039:Intermediate filament protein, conserved site	5	2.12766	0.00626249	3848, 3891, 3880, 196374, 338785	214	64	18559	6.77534	0.948772	0.329128	0.326345
SMART	SM00389:HOX	10	4.25532	0.0067876	1745, 2019, 3229, 2128, 11281, 3227, 79776, 3224, 1748, 4009	137	250	10057	2.93635	0.570242	0.420831	0.417438
GOTERM_CC_DIRECT	GO:0045095~keratin filament	6	2.55319	0.0074349	3848, 3891, 386683, 196374, 643803, 338785	222	100	18224	4.92541	0.841703	0.459105	0.459105
UP_KEYWORDS	SH2 domain	6	2.55319	0.00746333	3937, 6452, 1124, 117157, 7525, 3702	232	108	20581	4.9284	0.864689	0.153285	0.14697
GOTERM_BP_DIRECT	GO:0043627~response to estrogen	5	2.12766	0.00776981	2625, 167465, 3880, 1495, 2099	203	65	16792	6.36302	0.999968	0.776753	0.776753
UP_SEQ_FEATURE	region of interest:Linker 12	5	2.12766	0.00784435	3848, 3891, 3880, 196374, 338785	232	68	20063	6.35871	0.99815	0.336275	0.332912
UP_SEQ_FEATURE	region of interest:Coil 2	5	2.12766	0.00784435	3848, 3891, 3880, 196374, 338785	232	68	20063	6.35871	0.99815	0.336275	0.332912
GOTERM_BP_DIRECT	GO:0007200~phospholipase C-activating G-protein coupled receptor signaling pathway	5	2.12766	0.00819484	148, 2099, 1241, 55107, 4988	203	66	16792	6.26661	0.999982	0.776753	0.776753
UP_SEQ_FEATURE	domain:Ig-like C2-type 1	8	3.40426	0.00906565	7087, 89858, 54538, 50863, 8807, 4978, 10666, 343413	232	202	20063	3.42489	0.999308	0.336275	0.332912
UP_SEQ_FEATURE	domain:Ig-like C2-type 2	8	3.40426	0.0092988	7087, 89858, 54538, 50863, 8807, 4978, 10666, 343413	232	203	20063	3.40802	0.999427	0.336275	0.332912
INTERPRO	IPR000980:SH2 domain	6	2.55319	0.00980899	3937, 6452, 1124, 117157, 7525, 3702	214	113	18559	4.60483	0.990558	0.433748	0.43008
INTERPRO	IPR003961:Fibronectin, type III	8	3.40426	0.0100872	23504, 5618, 1303, 54538, 5787, 3560, 64778, 63923	214	207	18559	3.35166	0.991733	0.433748	0.43008
UP_SEQ_FEATURE	region of interest:Linker 1	5	2.12766	0.0105086	3848, 3891, 3880, 196374, 338785	232	74	20063	5.84314	0.999784	0.336275	0.332912
UP_SEQ_FEATURE	region of interest:Coil 1B	5	2.12766	0.0105086	3848, 3891, 3880, 196374, 338785	232	74	20063	5.84314	0.999784	0.336275	0.332912
UP_SEQ_FEATURE	region of interest:Coil 1A	5	2.12766	0.0105086	3848, 3891, 3880, 196374, 338785	232	74	20063	5.84314	0.999784	0.336275	0.332912
UP_KEYWORDS	SH3 domain	8	3.40426	0.010977	23504, 346389, 50807, 1740, 10580, 7525, 221178, 3702	232	215	20581	3.30088	0.947506	0.193765	0.185783
UP_SEQ_FEATURE	region of interest:Rod	5	2.12766	0.0110027	3848, 3891, 3880, 196374, 338785	232	75	20063	5.76523	0.999855	0.338545	0.335159
UP_KEYWORDS	Intermediate filament	5	2.12766	0.0110477	3848, 3891, 3880, 196374, 338785	232	77	20581	5.76047	0.948498	0.193765	0.185783
GOTERM_BP_DIRECT	GO:0071222~cellular response to lipopolysaccharide	6	2.55319	0.0118156	3569, 5142, 1234, 1053, 948, 114548	203	113	16792	4.39217	1	0.959675	0.959675
UP_SEQ_FEATURE	region of interest:Head	5	2.12766	0.0120353	3848, 3891, 3880, 196374, 338785	232	77	20063	5.61548	0.999937	0.356603	0.353037
INTERPRO	IPR001664:Intermediate filament protein	5	2.12766	0.0124239	3848, 3891, 3880, 196374, 338785	214	78	18559	5.55925	0.997297	0.489709	0.485568
GOTERM_BP_DIRECT	GO:0007165~signal transduction	24	10.2128	0.0125943	91662, 6452, 5142, 6693, 9046, 8793, 5133, 7026, 4046, 2078, 261734, 2099, 2131, 3560, 114548, 2625, 10326, 59307, 1136, 1124, 148, 90627, 10666, 3702	203	1161	16792	1.70996	1	0.959675	0.959675
SMART	SM00252:SH2	6	2.55319	0.0127868	3937, 6452, 1124, 117157, 7525, 3702	137	103	10057	4.27624	0.79725	0.4605	0.456786
GOTERM_BP_DIRECT	GO:0006955~immune response	12	5.10638	0.013095	3603, 9235, 3937, 3569, 6352, 6693, 8793, 1234, 2113, 1241, 948, 8807	203	421	16792	2.35779	1	0.959675	0.959675
UP_KEYWORDS	Alternative splicing	137	58.2979	0.0134592	25903, 5142, 23209, 11186, 63982, 2550, 2823, 473, 2820, 89858, 79776, 358, 26278, 79899, 57509, 84561, 4600, 60592, 8807, 9235, 6484, 7456, 79083, 23057, 261734, 9590, 1745, 80352, 246, 1740, 800, 55615, 5787, 923, 1748, 4978, 11281, 93611, 145270, 57484, 55340, 56833, 59307, 123036, 1993, 57126, 54538, 196374, 11320, 658, 6404, 55107, 4988, 6926, 91662, 1495, 221178, 29933, 9891, 1124, 148, 297…	232	10587	20581	1.14796	0.973164	0.211389	0.20268
KEGG_PATHWAY	hsa04520:Adherens junction	5	2.12766	0.0141943	10580, 7525, 1495, 5787, 6934	92	71	6879	5.26562	0.905471	0.585516	0.585516
INTERPRO	IPR008160:Collagen triple helix repeat	5	2.12766	0.014707	1303, 1277, 8292, 1280, 1307	214	82	18559	5.28807	0.999095	0.53511	0.530585
GOTERM_BP_DIRECT	GO:0050728~negative regulation of inflammatory response	5	2.12766	0.0151513	2625, 91662, 3848, 2113, 114548	203	79	16792	5.23539	1	0.959675	0.959675
GOTERM_BP_DIRECT	GO:0045087~innate immune response	12	5.10638	0.015187	2625, 10326, 613209, 117157, 8876, 7525, 1671, 4600, 923, 114548, 3702, 3824	203	430	16792	2.30844	1	0.959675	0.959675
GOTERM_CC_DIRECT	GO:0005604~basement membrane	5	2.12766	0.0155828	6693, 340706, 3908, 1471, 1280	222	79	18224	5.19558	0.979334	0.717438	0.717438
GOTERM_BP_DIRECT	GO:0006935~chemotaxis	6	2.55319	0.0160148	6352, 6693, 1234, 4046, 5337, 112616	203	122	16792	4.06816	1	0.965983	0.965983
UP_SEQ_FEATURE	domain:Fibronectin type-III 3	5	2.12766	0.0161307	23504, 1303, 5787, 64778, 63923	232	84	20063	5.14753	0.999998	0.444984	0.440534
INTERPRO	IPR007110:Immunoglobulin-like domain	17	7.23404	0.0164549	7087, 5133, 10326, 284759, 56833, 59307, 89858, 56244, 284415, 54538, 50863, 11126, 8807, 79908, 10666, 4978, 343413	214	771	18559	1.91221	0.999609	0.555942	0.55124
SMART	SM00409:IG	14	5.95745	0.0168996	7087, 5133, 10326, 284759, 89858, 56244, 284415, 54538, 50863, 8807, 79908, 10666, 4978, 343413	137	497	10057	2.06785	0.87918	0.4605	0.456786
SMART	SM01391:SM01391	5	2.12766	0.0185686	3848, 3891, 3880, 196374, 338785	137	75	10057	4.89392	0.902133	0.4605	0.456786
GOTERM_BP_DIRECT	GO:0070374~positive regulation of ERK1 and ERK2 cascade	7	2.97872	0.0193382	50507, 3569, 6352, 246, 148, 948, 4988	203	175	16792	3.30877	1	1	1
GOTERM_CC_DIRECT	GO:0042383~sarcolemma	5	2.12766	0.019862	9722, 3880, 3908, 358, 4988	222	85	18224	4.82883	0.992954	0.717438	0.717438
UP_KEYWORDS	Transmembrane	79	33.617	0.0199669	2191, 50507, 7087, 23209, 645369, 63982, 2550, 3560, 2823, 5618, 2820, 1136, 1015, 89858, 284415, 23120, 358, 81697, 84561, 3676, 8807, 2825, 137835, 6484, 5551, 3294, 22918, 5787, 923, 80031, 10666, 23704, 6693, 8793, 50807, 2099, 1241, 57484, 2131, 145270, 64778, 55340, 284759, 80342, 56833, 59307, 1234, 9080, 1277, 11320, 658, 10791, 8987, 6404, 55107, 11126, 8708, 4988, 219858, 343413, 6582, …	232	5651	20581	1.24017	0.995416	0.274613	0.263299
GOTERM_CC_DIRECT	GO:0005576~extracellular region	30	12.766	0.0203322	25903, 6352, 6750, 5267, 2550, 29106, 114548, 1280, 5618, 613209, 1277, 6947, 83690, 5173, 64388, 11096, 5551, 1671, 1471, 3603, 2778, 1303, 3569, 566, 3908, 146723, 5104, 4313, 923, 1307	222	1610	18224	1.52963	0.993742	0.717438	0.717438
UP_KEYWORDS	Cell junction	15	6.38298	0.0203961	50507, 2191, 23504, 10580, 1495, 8292, 261734, 2550, 145270, 2898, 1136, 1740, 9080, 57554, 85477	232	675	20581	1.97136	0.995922	0.274613	0.263299
UP_SEQ_FEATURE	splice variant	106	45.1064	0.0203994	25903, 5142, 11186, 2550, 473, 2820, 89858, 79776, 26278, 79899, 57509, 84561, 60592, 9235, 6484, 7456, 79083, 23057, 9590, 80352, 1740, 800, 55615, 5787, 923, 1748, 11281, 93611, 145270, 57484, 55340, 56833, 59307, 123036, 1993, 57126, 54538, 196374, 55107, 4988, 6926, 91662, 1495, 29933, 9891, 148, 2972, 117157, 83641, 1001, 50863, 6934, 8837, 3824, 50507, 2191, 91574, 4133, 135644, 440854, 207…	232	7760	20063	1.18128	1	0.530074	0.524773
UP_SEQ_FEATURE	lipid moiety-binding region:S-palmitoyl cysteine	7	2.97872	0.0205404	2778, 1234, 148, 1740, 5337, 948, 4988	232	185	20063	3.27216	1	0.530074	0.524773
UP_KEYWORDS	Cytokine	7	2.97872	0.0205703	3603, 9235, 3569, 6352, 64388, 284415, 112616	232	190	20581	3.26831	0.996111	0.274613	0.263299
GOTERM_MF_DIRECT	GO:0005525~GTP binding	11	4.68085	0.0209936	115361, 2778, 170575, 55303, 2983, 155038, 168537, 5105, 4600, 55340, 2769	209	384	16881	2.31373	0.999642	1	1
GOTERM_MF_DIRECT	GO:0003779~actin binding	9	3.82979	0.02214	83988, 9535, 1234, 4046, 7456, 10580, 800, 79083, 85477	209	278	16881	2.61487	0.999769	1	1
KEGG_PATHWAY	hsa04650:Natural killer cell mediated cytotoxicity	6	2.55319	0.0223983	3937, 6452, 8793, 5551, 117157, 3824	92	122	6879	3.6773	0.976192	0.739144	0.739144
GOTERM_BP_DIRECT	GO:0007204~positive regulation of cytosolic calcium ion concentration	6	2.55319	0.023015	1234, 148, 2099, 948, 4988, 2769	203	134	16792	3.70385	1	1	1
GOTERM_MF_DIRECT	GO:0003682~chromatin binding	11	4.68085	0.0233863	2625, 1745, 473, 3229, 56981, 4762, 8626, 2078, 2099, 27324, 51316	209	391	16881	2.27231	0.999857	1	1
GOTERM_BP_DIRECT	GO:0032355~response to estradiol	5	2.12766	0.0241386	7026, 2113, 1277, 2099, 1471	203	91	16792	4.54501	1	1	1
INTERPRO	IPR003598:Immunoglobulin subtype 2	8	3.40426	0.0255671	7087, 284759, 89858, 54538, 50863, 4978, 10666, 343413	214	250	18559	2.77518	0.999995	0.755829	0.749437
GOTERM_CC_DIRECT	GO:0005581~collagen trimer	5	2.12766	0.0256897	1303, 1277, 8292, 948, 1280	222	92	18224	4.46142	0.998385	0.79317	0.79317
UP_KEYWORDS	Cell membrane	48	20.4255	0.0263506	50507, 2191, 23504, 23209, 8876, 63982, 1241, 2099, 2550, 145270, 2823, 1136, 1015, 1234, 1179, 9080, 358, 81697, 57126, 57509, 658, 10791, 55107, 11126, 4988, 2825, 219858, 5551, 4046, 10580, 1495, 221178, 29933, 3848, 2778, 2898, 246, 1740, 148, 57554, 1001, 7525, 923, 50863, 80031, 948, 10666, 4978	232	3175	20581	1.34115	0.999199	0.325405	0.311999
UP_KEYWORDS	Extracellular matrix	8	3.40426	0.0268124	1303, 11096, 3908, 1277, 4313, 63923, 1280, 1307	232	258	20581	2.75074	0.999295	0.325405	0.311999
UP_SEQ_FEATURE	nucleotide phosphate-binding region:GTP	9	3.82979	0.0278784	115361, 2778, 55303, 155038, 168537, 5105, 4600, 55340, 2769	232	310	20063	2.51066	1	0.655961	0.649402
UP_KEYWORDS	Palmitate	9	3.82979	0.0304675	2778, 1234, 148, 1740, 7525, 2099, 5337, 948, 4988	232	324	20581	2.4642	0.999742	0.348934	0.334559
GOTERM_BP_DIRECT	GO:0042493~response to drug	9	3.82979	0.0309727	2625, 2778, 3569, 148, 6750, 358, 1277, 1001, 1471	203	304	16792	2.44892	1	1	1
UP_KEYWORDS	Lipoprotein	17	7.23404	0.0313649	8876, 2099, 9590, 3241, 2778, 83988, 1740, 1234, 148, 57126, 7525, 5337, 50863, 11126, 948, 4988, 4978	232	852	20581	1.77006	0.999798	0.348934	0.334559
GOTERM_BP_DIRECT	GO:0030198~extracellular matrix organization	7	2.97872	0.0314485	25903, 7087, 3908, 1277, 3676, 1280, 1307	203	196	16792	2.95426	1	1	1
GOTERM_MF_DIRECT	GO:0000978~RNA polymerase II core promoter proximal region sequence-specific DNA binding	10	4.25532	0.0320779	2019, 51351, 255403, 3227, 2302, 2099, 1053, 1748, 6934, 6926	209	355	16881	2.27522	0.999995	1	1
UP_SEQ_FEATURE	transmembrane region	72	30.6383	0.0324891	2191, 50507, 7087, 23209, 645369, 63982, 2550, 3560, 2823, 5618, 1136, 1015, 89858, 284415, 23120, 358, 81697, 84561, 3676, 8807, 2825, 137835, 6484, 5551, 3294, 22918, 5787, 923, 80031, 10666, 23704, 6693, 8793, 1241, 57484, 2131, 145270, 64778, 55340, 284759, 80342, 56833, 59307, 1234, 9080, 11320, 658, 10791, 8987, 6404, 55107, 8708, 4988, 219858, 343413, 6582, 5133, 4245, 29933, 64108, 112616…	232	5056	20063	1.2315	1	0.742607	0.735181
UP_KEYWORDS	Signal-anchor	11	4.68085	0.0333801	2191, 6484, 59307, 56244, 4245, 11320, 2131, 8987, 8708, 3294, 3824	232	455	20581	2.14467	0.999884	0.356499	0.341812
GOTERM_BP_DIRECT	GO:0016337~single organismal cell-cell adhesion	5	2.12766	0.0336544	7087, 8876, 1001, 22918, 261734	203	101	16792	4.09501	1	1	1
GOTERM_MF_DIRECT	GO:0002020~protease binding	5	2.12766	0.0362672	2191, 5104, 5269, 1471, 8837	209	101	16881	3.99853	0.999999	1	1
GOTERM_CC_DIRECT	GO:0016021~integral component of membrane	76	32.3404	0.0387726	2191, 50507, 7087, 23209, 645369, 63982, 2550, 2823, 5618, 2820, 1136, 1015, 89858, 284415, 23120, 358, 81697, 84561, 3676, 8807, 2825, 137835, 6484, 5551, 3294, 22918, 923, 80031, 10666, 23704, 6693, 8876, 50807, 2099, 1241, 57484, 2131, 145270, 64778, 55340, 284759, 80342, 56833, 59307, 1234, 9080, 1277, 54538, 11320, 658, 6404, 55107, 11126, 8708, 4988, 219858, 343413, 6582, 5133, 4245, 29933,…	222	5163	18224	1.20838	0.999943	0.985935	0.985935
UP_KEYWORDS	Developmental protein	18	7.65957	0.0393533	64388, 4762, 1745, 473, 2019, 3229, 2128, 3227, 54456, 3224, 54538, 8626, 10791, 55107, 4009, 1748, 80031, 6926	232	949	20581	1.68262	0.999978	0.403927	0.387285
GOTERM_CC_DIRECT	GO:0045121~membrane raft	7	2.97872	0.0399164	23209, 10580, 1241, 948, 4988, 8837, 10666	222	206	18224	2.78947	0.999957	0.985935	0.985935
INTERPRO	IPR001452:Src homology-3 domain	7	2.97872	0.0406405	23504, 50807, 1740, 10580, 7525, 221178, 3702	214	218	18559	2.78473	1	0.915378	0.907637
UP_KEYWORDS	Golgi apparatus	16	6.80851	0.0408465	6484, 155038, 4245, 23057, 2099, 2131, 115361, 170575, 168537, 57509, 11320, 10791, 5337, 60592, 8708, 948	232	812	20581	1.748	0.999985	0.403927	0.387285
KEGG_PATHWAY	hsa04060:Cytokine-cytokine receptor interaction	8	3.40426	0.041342	5618, 3569, 6352, 8793, 1234, 658, 3560, 8807	92	243	6879	2.46162	0.999057	0.959675	0.959675
KEGG_PATHWAY	hsa04915:Estrogen signaling pathway	5	2.12766	0.0416984	2778, 2099, 2550, 4313, 4988	92	99	6879	3.77635	0.999113	0.959675	0.959675
GOTERM_BP_DIRECT	GO:0071356~cellular response to tumor necrosis factor	5	2.12766	0.0438445	2625, 3569, 6352, 1277, 5105	203	110	16792	3.75996	1	1	1
GOTERM_BP_DIRECT	GO:0042981~regulation of apoptotic process	7	2.97872	0.0444704	8793, 9722, 2113, 8626, 54538, 2099, 8837	203	213	16792	2.71847	1	1	1
INTERPRO	IPR013761:Sterile alpha motif/pointed domain	5	2.12766	0.0459285	3937, 2113, 8626, 2078, 90627	214	117	18559	3.70617	1	0.987464	0.979113
KEGG_PATHWAY	hsa05142:Chagas disease (American trypanosomiasis)	5	2.12766	0.0484951	2778, 3569, 6352, 8837, 2769	92	104	6879	3.5948	0.999726	0.959675	0.959675
UP_KEYWORDS	Cleavage on pair of basic residues	8	3.40426	0.048676	5173, 2191, 2778, 11096, 6750, 1001, 29106, 6404	232	294	20581	2.41391	0.999998	0.451684	0.433076
GOTERM_CC_DIRECT	GO:0005882~intermediate filament	5	2.12766	0.0488032	728299, 3891, 3880, 337968, 338785	222	113	18224	3.6323	0.999996	1	1
GOTERM_BP_DIRECT	GO:0043066~negative regulation of apoptotic process	11	4.68085	0.0488614	5618, 3569, 8793, 5133, 566, 358, 8626, 3560, 51316, 8837, 6926	203	455	16792	1.99981	1	1	1
UP_KEYWORDS	Transmembrane helix	76	32.3404	0.0490594	2191, 50507, 7087, 23209, 645369, 63982, 2550, 3560, 2823, 5618, 2820, 1136, 1015, 89858, 284415, 23120, 358, 81697, 84561, 3676, 8807, 2825, 137835, 6484, 3294, 22918, 5787, 923, 80031, 10666, 23704, 6693, 8793, 50807, 1241, 57484, 2131, 145270, 64778, 55340, 284759, 80342, 56833, 59307, 1234, 9080, 1277, 11320, 658, 10791, 8987, 6404, 55107, 8708, 4988, 219858, 343413, 6582, 5133, 4245, 29933, …	232	5634	20581	1.19667	0.999999	0.451684	0.433076
GOTERM_BP_DIRECT	GO:0045944~positive regulation of transcription from RNA polymerase II promoter	19	8.08511	0.0491735	4762, 2099, 1053, 114548, 2625, 473, 2019, 3229, 2128, 3569, 3227, 2302, 2113, 7525, 8626, 658, 4009, 51316, 6934	203	981	16792	1.60211	1	1	1
UP_SEQ_FEATURE	domain:SH3	6	2.55319	0.0519983	346389, 50807, 1740, 7525, 221178, 3702	232	175	20063	2.96498	1	1	0.991239
GOTERM_MF_DIRECT	GO:0004872~receptor activity	7	2.97872	0.0522825	3848, 2983, 22918, 54538, 11126, 8807, 10666	209	217	16881	2.60549	1	1	1
GOTERM_BP_DIRECT	GO:0000122~negative regulation of transcription from RNA polymerase II promoter	15	6.38298	0.05292	7026, 2099, 2625, 1745, 473, 2019, 167465, 2302, 3224, 8626, 7329, 1748, 948, 6934, 6926	203	720	16792	1.72332	1	1	1
SMART	SM00408:IGc2	8	3.40426	0.0529243	7087, 284759, 89858, 54538, 50863, 4978, 10666, 343413	137	250	10057	2.34908	0.99882	0.937516	0.929955
UP_KEYWORDS	Immunity	11	4.68085	0.0564443	2625, 5133, 117157, 284415, 2113, 4600, 923, 57824, 114548, 79908, 3702	232	500	20581	1.95165	1	0.486149	0.466121
SMART	SM00326:SH3	7	2.97872	0.0606058	23504, 50807, 1740, 10580, 7525, 221178, 3702	137	206	10057	2.49447	0.99957	0.939389	0.931814
GOTERM_CC_DIRECT	GO:0016324~apical plasma membrane	8	3.40426	0.0647168	50507, 2778, 23704, 23209, 358, 5337, 55107, 948	222	291	18224	2.25677	1	1	1
KEGG_PATHWAY	hsa04670:Leukocyte transendothelial migration	5	2.12766	0.0654775	9080, 1495, 4313, 3676, 3702	92	115	6879	3.25095	0.999986	1	1
GOTERM_CC_DIRECT	GO:0009986~cell surface	12	5.10638	0.0668184	5618, 2191, 613209, 6693, 1015, 1234, 22918, 10791, 3676, 63923, 948, 10666	222	542	18224	1.81749	1	1	1
GOTERM_MF_DIRECT	GO:0005125~cytokine activity	6	2.55319	0.0671689	3603, 9235, 3569, 64388, 284415, 112616	209	176	16881	2.75353	1	1	1
UP_KEYWORDS	GPI-anchor	5	2.12766	0.0687468	8876, 57126, 50863, 11126, 4978	232	137	20581	3.23764	1	0.538573	0.516385
UP_KEYWORDS	Host-virus interaction	9	3.82979	0.0696141	3603, 1234, 3880, 9080, 22918, 7329, 6404, 3560, 8837	232	385	20581	2.07377	1	0.538573	0.516385
UP_KEYWORDS	Calcium	16	6.80851	0.0699278	5551, 440854, 3241, 1280, 2820, 83988, 246, 1015, 1179, 1277, 1001, 85477, 4313, 3676, 343641, 55107	232	877	20581	1.61845	1	0.538573	0.516385
UP_KEYWORDS	Activator	13	5.53191	0.0705994	346389, 7026, 4762, 2099, 27324, 1053, 114548, 2625, 2302, 2972, 8626, 4009, 6934	232	661	20581	1.7447	1	0.538573	0.516385
GOTERM_MF_DIRECT	GO:0001077~transcriptional activator activity, RNA polymerase II core promoter proximal region sequence-specific binding	7	2.97872	0.0722776	2625, 3229, 3227, 2302, 8626, 2099, 1053	209	236	16881	2.39573	1	1	1
UP_SEQ_FEATURE	compositionally biased region:Poly-Arg	6	2.55319	0.0740519	11096, 358, 800, 221178, 29933, 10666	232	194	20063	2.67459	1	1	0.991239
GOTERM_MF_DIRECT	GO:0005515~protein binding	120	51.0638	0.0758215	23209, 6352, 3880, 11186, 2550, 3241, 2823, 473, 2302, 358, 79899, 4600, 60592, 2825, 9235, 5551, 7456, 79083, 261734, 9590, 1471, 83988, 246, 1740, 644, 800, 22918, 5787, 923, 7329, 1748, 10666, 23704, 93611, 55340, 3937, 59307, 1993, 1234, 57126, 51268, 658, 6404, 55107, 4988, 6926, 91662, 4762, 1495, 221178, 64108, 338785, 9891, 54544, 1124, 117157, 168537, 50863, 6934, 948, 3702, 8837, 3824, …	209	8785	16881	1.10329	1	1	1
UP_KEYWORDS	Receptor	26	11.0638	0.0760628	8793, 7026, 1241, 2099, 2550, 3560, 5618, 1136, 1234, 81697, 54538, 658, 3676, 6404, 11126, 8807, 4988, 2825, 219858, 29933, 2898, 148, 22918, 948, 10666, 3824	232	1648	20581	1.39957	1	0.548886	0.526273
KEGG_PATHWAY	hsa04151:PI3K-Akt signaling pathway	9	3.82979	0.0851991	5618, 3569, 3908, 1277, 5105, 3676, 3560, 63923, 1280	92	345	6879	1.95057	1	1	1
GOTERM_CC_DIRECT	GO:0015630~microtubule cytoskeleton	5	2.12766	0.0855725	10579, 84643, 11186, 3224, 9891	222	137	18224	2.99599	1	1	1
GOTERM_CC_DIRECT	GO:0005887~integral component of plasma membrane	24	10.2128	0.0921814	6582, 7087, 6693, 8793, 2550, 1241, 3560, 10326, 2898, 1234, 148, 1179, 358, 10791, 658, 5787, 8987, 923, 6404, 948, 4988, 80031, 2825, 10666	222	1415	18224	1.39234	1	1	1
KEGG_PATHWAY	hsa04611:Platelet activation	5	2.12766	0.0929885	2778, 3937, 2983, 1277, 1280	92	130	6879	2.87584	1	1	1
GOTERM_BP_DIRECT	GO:0042742~defense response to bacterium	5	2.12766	0.097897	613209, 6693, 11096, 1053, 51316	203	145	16792	2.85239	1	1	1

## Sheet: GO_hyper_KS_PEL
Category	Term	Count	%	PValue	Genes	List Total	Pop Hits	Pop Total	Fold Enrichment	Bonferroni	Benjamini	FDR
UP_SEQ_FEATURE	splice variant	100	51.0204	0.000142686	285671, 348378, 7048, 399687, 8412, 65009, 23327, 51084, 117584, 23161, 632, 5777, 4689, 9750, 22883, 9990, 7050, 339768, 170679, 201294, 2035, 283234, 90427, 8537, 147837, 1627, 130576, 64332, 29, 116985, 55862, 79712, 54894, 3895, 7337, 51422, 1912, 1636, 2180, 23318, 9771, 64220, 92359, 286676, 154810, 57494, 81619, 3784, 4636, 197358, 84174, 9145, 29108, 245973, 272, 4093, 256586, 55803, 5443…	192	7760	20063	1.34658	0.0834946	0.0873237	0.0873237
UP_KEYWORDS	Cell membrane	49	25	0.000470513	7048, 26996, 1140, 83756, 117584, 51764, 55803, 85450, 6505, 10457, 9750, 2242, 3177, 22883, 9990, 59338, 7007, 54843, 7803, 6518, 9123, 130576, 401190, 5045, 6533, 9963, 23189, 116985, 57121, 23224, 3460, 135, 2886, 54894, 4026, 30845, 1636, 9056, 64220, 92359, 286676, 64101, 81619, 9170, 2217, 114880, 3784, 5724, 84174	195	3175	20581	1.62886	0.105121	0.0440629	0.042756
UP_KEYWORDS	Alternative splicing	124	63.2653	0.000487406	285671, 348378, 7048, 399687, 8412, 65009, 23327, 51084, 117584, 23161, 11342, 5777, 4689, 6503, 9750, 23576, 22883, 9990, 7050, 6480, 339768, 170679, 201294, 2035, 283234, 90427, 8537, 60481, 147837, 1627, 6518, 130576, 64332, 6533, 29, 116985, 29803, 55862, 79712, 54894, 55902, 83891, 3895, 7337, 51422, 1912, 1636, 2180, 23318, 9771, 64220, 92359, 286676, 154810, 57494, 81619, 9770, 10924, 2901…	195	10587	20581	1.23618	0.108684	0.0440629	0.042756
UP_KEYWORDS	SH2 domain	7	3.57143	0.000560122	2886, 9610, 8412, 2242, 5777, 6503, 84174	195	108	20581	6.84079	0.123857	0.0440629	0.042756
INTERPRO	IPR000980:SH2 domain	7	3.57143	0.000797265	2886, 9610, 8412, 2242, 5777, 6503, 84174	180	113	18559	6.38707	0.285221	0.335649	0.335649
SMART	SM00252:SH2	7	3.57143	0.00113932	2886, 9610, 8412, 2242, 5777, 6503, 84174	116	103	10057	5.89212	0.120864	0.128743	0.128743
UP_SEQ_FEATURE	domain:SH2	6	3.06122	0.00225304	2886, 9610, 8412, 2242, 6503, 84174	192	96	20063	6.53092	0.747958	0.624234	0.624234
UP_KEYWORDS	Membrane	91	46.4286	0.00263047	285671, 9145, 348378, 7048, 26996, 65009, 1140, 83756, 117584, 23161, 85414, 114990, 29103, 51764, 11342, 55803, 4248, 4689, 85450, 6505, 10457, 8728, 11226, 9674, 9750, 3695, 2242, 3177, 22883, 9990, 23138, 6480, 59338, 201294, 2035, 7007, 283234, 54843, 60481, 119395, 8818, 7803, 6518, 9123, 130576, 401190, 5045, 6533, 9963, 6653, 23189, 116985, 57121, 221301, 23224, 3460, 93010, 135, 2886, 570…	195	7494	20581	1.28162	0.462921	0.139463	0.135326
UP_SEQ_FEATURE	domain:Tyrosine-protein phosphatase	5	2.55102	0.00305997	1844, 54961, 5777, 1848, 7803	192	63	20063	8.29324	0.846263	0.624234	0.624234
GOTERM_CC_DIRECT	GO:0005886~plasma membrane	59	30.102	0.0032287	7048, 26996, 23327, 83756, 51084, 117584, 114990, 51764, 55803, 85450, 6505, 10457, 3695, 3177, 9990, 59338, 2114, 57553, 2035, 7007, 90427, 54843, 10300, 1627, 6518, 9123, 130576, 401190, 5045, 6533, 29, 9963, 23189, 116985, 57121, 3460, 135, 2886, 57047, 975, 54894, 4026, 84660, 1636, 2180, 9056, 64220, 92359, 286676, 9610, 162514, 81619, 9170, 2217, 114880, 3784, 6539, 5724, 84174	185	4121	18224	1.41033	0.497835	0.687714	0.687714
UP_KEYWORDS	Lipid-binding	8	4.08163	0.00375391	59338, 2886, 23161, 114880, 114884, 2242, 414149, 4689	195	209	20581	4.03995	0.588353	0.139463	0.135326
UP_KEYWORDS	Cytoplasm	63	32.1429	0.00387724	6397, 10095, 399687, 29108, 65009, 4093, 23327, 9020, 51084, 117584, 1454, 55803, 5777, 4689, 6503, 140609, 9750, 2242, 59338, 55893, 57553, 55655, 54961, 201294, 2035, 54843, 8537, 10300, 1627, 7803, 1428, 401190, 8557, 114884, 23189, 116985, 23224, 3460, 2886, 55862, 4026, 55902, 53405, 7337, 84660, 5914, 1636, 23318, 286676, 9610, 57494, 27314, 9770, 375449, 79187, 1326, 114880, 864, 822, 8344…	195	4816	20581	1.38066	0.600207	0.139463	0.135326
UP_KEYWORDS	Symport	6	3.06122	0.00436424	9123, 6533, 9963, 6539, 9990, 6505	195	113	20581	5.60408	0.643783	0.139463	0.135326
UP_KEYWORDS	Phosphoprotein	97	49.4898	0.00472755	285671, 10095, 7048, 399687, 8412, 65009, 23327, 51084, 117584, 1454, 5777, 4689, 6503, 6505, 9750, 9990, 6480, 201294, 2035, 283234, 8537, 60481, 10300, 1627, 9123, 5045, 8557, 6533, 29, 6653, 116985, 29803, 55902, 83891, 3895, 7337, 51422, 1912, 1636, 2180, 23318, 286676, 154810, 9770, 2217, 79666, 29015, 822, 3784, 84174, 6397, 29108, 1140, 272, 4093, 9020, 256586, 29103, 85450, 10457, 9278, 1…	195	8246	20581	1.24154	0.673181	0.139463	0.135326
UP_KEYWORDS	Endosome	12	6.12245	0.00608947	117584, 23161, 79666, 201294, 6653, 83891, 3784, 11342, 30845, 4689, 6503, 7803	195	481	20581	2.6331	0.763429	0.159679	0.154943
GOTERM_MF_DIRECT	GO:0001078~transcriptional repressor activity, RNA polymerase II core promoter proximal region sequence-specific binding	6	3.06122	0.006427	122953, 2114, 93986, 51222, 388585, 7050	179	111	16881	5.09769	0.886884	1	1
INTERPRO	IPR000387:Protein-tyrosine/Dual specificity phosphatase	5	2.55102	0.00816153	1844, 54961, 5777, 1848, 7803	180	82	18559	6.28692	0.968258	0.863553	0.863553
UP_SEQ_FEATURE	active site:Phosphocysteine intermediate	5	2.55102	0.00921588	1844, 54961, 5777, 1848, 7803	192	86	20063	6.07528	0.996507	1	1
UP_KEYWORDS	Non-syndromic deafness	5	2.55102	0.00927542	9750, 286676, 53405, 7007, 1428	195	87	20581	6.06572	0.88911	0.218676	0.21219
UP_KEYWORDS	Golgi apparatus	16	8.16327	0.0101925	6397, 5045, 399687, 6653, 2242, 116985, 22883, 27314, 3460, 93010, 6480, 54463, 11342, 53405, 4248, 11226	195	812	20581	2.07968	0.91088	0.218676	0.21219
GOTERM_BP_DIRECT	GO:0007605~sensory perception of sound	6	3.06122	0.0122286	9750, 3784, 53405, 7007, 3198, 1428	174	133	16792	4.35364	0.999999	1	1
GOTERM_MF_DIRECT	GO:0035091~phosphatidylinositol binding	5	2.55102	0.0124806	2886, 23161, 83891, 2242, 4689	179	85	16881	5.54749	0.985664	1	1
GOTERM_CC_DIRECT	GO:0005887~integral component of plasma membrane	24	12.2449	0.0158342	9056, 9123, 7048, 6533, 162514, 9963, 6653, 3177, 81619, 221301, 9170, 1140, 3460, 9990, 135, 54894, 975, 3895, 119395, 6539, 5724, 6505, 10457, 6518	185	1415	18224	1.67081	0.966616	1	1
INTERPRO	IPR001849:Pleckstrin homology domain	8	4.08163	0.0163484	59338, 2886, 114880, 79666, 29, 114884, 55803, 116985	180	271	18559	3.04371	0.999031	1	1
UP_KEYWORDS	Ligase	9	4.59184	0.0174175	2180, 285671, 117584, 54894, 11342, 55902, 57494, 7337, 23327	195	347	20581	2.73744	0.984184	0.342544	0.332384
GOTERM_BP_DIRECT	GO:0035335~peptidyl-tyrosine dephosphorylation	5	2.55102	0.0192189	1844, 54961, 5777, 1848, 7803	174	99	16792	4.87403	1	1	1
GOTERM_CC_DIRECT	GO:0042470~melanosome	5	2.55102	0.0192415	89781, 9145, 822, 54843, 10457	185	101	18224	4.87664	0.984051	1	1
GOTERM_MF_DIRECT	GO:0004725~protein tyrosine phosphatase activity	5	2.55102	0.0214237	1844, 54961, 5777, 1848, 7803	179	100	16881	4.71536	0.999338	1	1
KEGG_PATHWAY	hsa05202:Transcriptional misregulation in cancer	6	3.06122	0.0228786	3206, 85414, 7048, 64332, 3695, 5914	68	167	6879	3.63455	0.967463	1	1
INTERPRO	IPR011993:Pleckstrin homology-like domain	10	5.10204	0.0230073	59338, 2886, 114880, 323, 79666, 2035, 29, 114884, 55803, 116985	180	427	18559	2.41465	0.999945	1	1
SMART	SM00233:PH	8	4.08163	0.0315948	59338, 2886, 114880, 79666, 29, 114884, 55803, 116985	116	264	10057	2.62722	0.973426	1	1
GOTERM_MF_DIRECT	GO:0000978~RNA polymerase II core promoter proximal region sequence-specific DNA binding	9	4.59184	0.0346986	55893, 3206, 122953, 144348, 2114, 93986, 51222, 25833, 7050	179	355	16881	2.39089	0.999993	1	1
UP_KEYWORDS	Protein phosphatase	5	2.55102	0.0373119	1844, 54961, 5777, 1848, 7803	195	133	20581	3.9678	0.999873	0.62792	0.609295
GOTERM_CC_DIRECT	GO:0000139~Golgi membrane	12	6.12245	0.0378211	80310, 117584, 5045, 399687, 11342, 4248, 27314, 22883, 3460, 93010, 6480, 11226	185	591	18224	2.00016	0.999729	1	1
INTERPRO	IPR001356:Homeodomain	7	3.57143	0.0380489	3218, 3206, 5453, 80714, 3198, 25833, 7050	180	256	18559	2.81929	1	1	1
UP_KEYWORDS	Homeobox	7	3.57143	0.0382438	3218, 3206, 5453, 80714, 3198, 25833, 7050	195	262	20581	2.81987	0.999899	0.62792	0.609295
UP_SEQ_FEATURE	repeat:LRR 9	5	2.55102	0.0393564	114990, 64101, 55655, 23224, 197358	192	134	20063	3.89906	1	1	1
UP_KEYWORDS	Deafness	6	3.06122	0.0399102	9750, 286676, 3784, 53405, 7007, 1428	195	198	20581	3.19829	0.999933	0.62792	0.609295
INTERPRO	IPR009057:Homeodomain-like	8	4.08163	0.0447545	3218, 3206, 5453, 54961, 80714, 3198, 25833, 7050	180	336	18559	2.45489	1	1	1
INTERPRO	IPR020846:Major facilitator superfamily domain	5	2.55102	0.0447682	9123, 85414, 29015, 3177, 6518	180	138	18559	3.73571	1	1	1
GOTERM_BP_DIRECT	GO:0006468~protein phosphorylation	10	5.10204	0.0468246	1326, 140609, 7048, 1454, 864, 2242, 51422, 9770, 4093, 5914	174	456	16792	2.11635	1	1	1
GOTERM_BP_DIRECT	GO:0007420~brain development	6	3.06122	0.0469469	7048, 9963, 29, 7337, 388585, 65009	174	190	16792	3.04755	1	1	1
UP_KEYWORDS	Transmembrane helix	65	33.1633	0.0482497	285671, 9145, 348378, 7048, 26996, 65009, 1140, 83756, 23161, 85414, 114990, 29103, 11342, 4248, 6505, 10457, 8728, 11226, 9674, 3695, 2242, 3177, 22883, 9990, 6480, 2035, 60481, 119395, 8818, 6518, 9123, 5045, 6533, 9963, 6653, 57121, 221301, 23224, 3460, 93010, 135, 57047, 55862, 975, 54894, 53405, 3895, 10554, 1636, 2180, 9056, 64220, 92359, 286676, 64101, 162514, 81619, 9170, 2217, 54463, 290…	195	5634	20581	1.21767	0.999991	0.642388	0.623334
GOTERM_CC_DIRECT	GO:0005802~trans-Golgi network	5	2.55102	0.0491757	5045, 399687, 6653, 116985, 27314	185	136	18224	3.62162	0.999978	1	1
UP_KEYWORDS	Transmembrane	65	33.1633	0.0509589	285671, 9145, 348378, 7048, 26996, 65009, 1140, 83756, 23161, 85414, 114990, 29103, 11342, 4248, 6505, 10457, 8728, 11226, 9674, 3695, 2242, 3177, 22883, 9990, 6480, 2035, 60481, 119395, 8818, 6518, 9123, 5045, 6533, 9963, 6653, 57121, 221301, 23224, 3460, 93010, 135, 57047, 55862, 975, 54894, 53405, 3895, 10554, 1636, 2180, 9056, 64220, 92359, 286676, 64101, 162514, 81619, 9170, 2217, 54463, 290…	195	5651	20581	1.214	0.999996	0.642388	0.623334
UP_KEYWORDS	Zinc	31	15.8163	0.0517177	285671, 116985, 272, 4093, 29803, 117584, 51222, 54894, 11342, 4026, 55803, 7337, 147948, 1912, 344787, 8728, 5914, 1636, 9278, 23318, 7776, 93986, 23576, 58525, 55893, 56265, 144348, 57553, 10924, 79666, 147837	195	2348	20581	1.39346	0.999996	0.642388	0.623334
UP_SEQ_FEATURE	repeat:LRR 8	5	2.55102	0.0534288	114990, 64101, 55655, 23224, 197358	192	148	20063	3.53023	1	1	1
GOTERM_CC_DIRECT	GO:0005737~cytoplasm	64	32.6531	0.0563504	6397, 29108, 65009, 4093, 23327, 339745, 9020, 51084, 117584, 1454, 632, 55803, 5777, 140609, 9750, 2242, 25833, 59338, 55893, 3206, 323, 2114, 57553, 55655, 54961, 2035, 30812, 54843, 8537, 10300, 1627, 7803, 1428, 401190, 9963, 114884, 23189, 23224, 29968, 4026, 55902, 53405, 7337, 84660, 30845, 5914, 89781, 23318, 64101, 9610, 154810, 57494, 27314, 9770, 375449, 79187, 1326, 864, 822, 3784, 83…	185	5222	18224	1.2073	0.999996	1	1
UP_SEQ_FEATURE	mutagenesis site	29	14.7959	0.0650986	7048, 399687, 3460, 23327, 9020, 83756, 117584, 54894, 4026, 4689, 6503, 1636, 23318, 92359, 9610, 3695, 9170, 22883, 7031, 79187, 59338, 55893, 80310, 201294, 2035, 3784, 54843, 7803, 84174	192	2191	20063	1.38309	1	1	1
GOTERM_MF_DIRECT	GO:0016874~ligase activity	7	3.57143	0.0664296	2180, 285671, 117584, 54894, 11342, 7337, 23327	179	270	16881	2.445	1	1	1
SMART	SM00389:HOX	7	3.57143	0.0667701	3218, 3206, 5453, 80714, 3198, 25833, 7050	116	250	10057	2.42755	0.999594	1	1
UP_KEYWORDS	DNA-binding	27	13.7755	0.0727027	9760, 80714, 4093, 29803, 3218, 51222, 6887, 147948, 1912, 344787, 5914, 9278, 5453, 7776, 93986, 388585, 3198, 25833, 7050, 55893, 3206, 122953, 144348, 2114, 864, 30812, 147837	195	2050	20581	1.39009	1	0.750422	0.728164
UP_KEYWORDS	Proto-oncogene	6	3.06122	0.0731343	80310, 1326, 2114, 6887, 2242, 5914	195	236	20581	2.68331	1	0.750422	0.728164
UP_KEYWORDS	Glycosyltransferase	6	3.06122	0.0731343	79712, 4248, 8818, 93010, 6480, 11226	195	236	20581	2.68331	1	0.750422	0.728164
GOTERM_MF_DIRECT	GO:0003779~actin binding	7	3.57143	0.0732645	57553, 54961, 2035, 822, 23224, 1627, 1636	179	278	16881	2.37464	1	1	1
GOTERM_MF_DIRECT	GO:0046983~protein dimerization activity	5	2.55102	0.0741654	89781, 6887, 388585, 245973, 4689	179	150	16881	3.14358	1	1	1
GOTERM_CC_DIRECT	GO:0070062~extracellular exosome	37	18.8776	0.0752455	10095, 5045, 9963, 6653, 245973, 23224, 29968, 23327, 79575, 51084, 114990, 79812, 975, 55862, 217, 53405, 5777, 6505, 1636, 23318, 92359, 3695, 23576, 22883, 6480, 58525, 59338, 80310, 2896, 10924, 822, 7007, 83442, 8537, 7803, 1428, 6518	185	2811	18224	1.29662	1	1	1
UP_KEYWORDS	Endoplasmic reticulum	16	8.16327	0.0799438	2180, 285671, 29108, 22883, 3460, 54463, 114880, 79666, 54894, 3784, 11342, 3895, 60481, 10554, 8818, 7803	195	1067	20581	1.58266	1	0.755441	0.733034
UP_KEYWORDS	Transport	26	13.2653	0.0800255	9123, 6533, 9963, 6653, 114884, 245973, 221301, 1140, 23161, 85414, 29103, 83891, 53405, 30845, 6505, 9056, 64220, 162514, 3177, 9990, 114880, 79666, 3784, 6539, 119395, 6518	195	1978	20581	1.38733	1	0.755441	0.733034
UP_SEQ_FEATURE	repeat:LRR 7	5	2.55102	0.0881138	114990, 64101, 55655, 23224, 197358	192	176	20063	2.9686	1	1	1
UP_KEYWORDS	Metal-binding	43	21.9388	0.0894054	285671, 7048, 5045, 116985, 272, 4093, 29803, 117584, 57047, 632, 51222, 54894, 11342, 4026, 55803, 7337, 30845, 147948, 1912, 344787, 8728, 5914, 11226, 1636, 9278, 23318, 140609, 7776, 93986, 3695, 57494, 23576, 375449, 58525, 55893, 1326, 56265, 144348, 57553, 10924, 79666, 147837, 4636	195	3640	20581	1.24681	1	0.806971	0.783035
UP_KEYWORDS	Nucleus	59	30.102	0.0923229	285671, 29108, 80714, 4093, 339745, 1454, 11342, 5777, 147948, 9278, 140609, 93986, 7776, 3177, 388585, 22883, 25833, 7050, 58525, 59338, 55893, 3206, 122953, 2114, 57553, 54961, 2035, 54845, 30812, 147837, 9760, 401190, 64332, 23189, 23224, 23468, 29803, 3218, 57047, 51222, 54894, 4026, 7337, 84660, 1912, 5914, 344787, 23318, 9771, 5453, 3198, 9770, 79187, 1844, 114880, 144348, 864, 822, 83442	195	5244	20581	1.18747	1	0.806971	0.783035
GOTERM_BP_DIRECT	GO:0042493~response to drug	7	3.57143	0.0946645	2180, 135, 7048, 632, 8412, 1848, 7050	174	304	16792	2.22217	1	1	1
GOTERM_MF_DIRECT	GO:0043565~sequence-specific DNA binding	10	5.10204	0.0980144	3218, 3206, 122953, 2114, 5453, 93986, 80714, 3198, 25833, 5914	179	518	16881	1.8206	1	1	1
