# Supplementary material for: Global CpG DNA Methylation Footprint in Kaposi’s Sarcoma
Source: Front Cell Infect Microbiol. 2021 Jul 9;11:666143. doi: 10.3389/fcimb.2021.666143 (PMC8300563; doi:10.3389/fcimb.2021.666143)
Supplement: Supplementary Table 5 — Phenotypes associated with differentially methylated regulatory elements. [file Table_5.xlsx]

## Sheet: hyper KS down KS
Gene Down
AACSP1
ACADL
ACER1
ACOT1
ACOX1
ACOX2
ACSL1
ACSS2
ACVR1C
ADCY6
ADIRF
ADRBK2
ADSSL1
AGAP11
AGR2
AK8
AKR1C2
ALDH2
ALDH4A1
ALDH5A1
ALOX12
ALOX12B
ALOX15B
AMOTL2
ANG
ANKK1
ANXA9
AP1M2
APOB
ARHGEF19
ARHGEF37
ARHGEF38
ASPH
ATG9B
ATP13A5
ATP1A1
ATP1B1
ATP2C2
ATP6V0A4
ATP6V1C2
BCAR3
BCAS1
BCL7A
BDNF
BEST2
BEST3
BMP4
BNIP3
BNIPL
BOK
BTC
BTG2
C11orf52
C11orf80
C14orf180
C15orf62
C19orf33
C1orf210
C1QTNF1
C1QTNF7
C2CD2
C5orf45
C5orf46
C6orf15
C6orf25
CA6
CA9
CAB39L
CALML3
CALML5
CALN1
CAMKK1
CAMSAP3
CAP2
CAPN13
CARNS1
CCDC129
CDC42EP4
CDKN2C
CDSN
CEACAM19
CEBPA
CERS4
CES4A
CHADL
CHDH
CHI3L1
CHIT1
CHPT1
CHRM1
CKB
CLMN
CLUL1
CMYA5
CPA1
CRABP2
CRB3
CRHR1-IT1
CRISP2
CRYAB
CST6
CTF1
CX3CL1
CYB5R2
CYP2W1
DAPK2
DCST2
DCUN1D3
DDIT3
DEFB1
DEFB132
DEGS2
DES
DFNB31
DGUOK-AS1
DHCR24
DMKN
DNAJA4
DNAJC27-AS1
DNASE1L2
DTNA
E2F2
ECHDC2
EEF1A2
EFNA3
EFS
ELOVL5
EML2
EMP2
EPHA1
EPHX1
EPHX2
EPS8L1
ESR1
EVPL
FAAH
FABP7
FADS3
FAM131C
FAM13A
FAM166A
FAM178B
FAM184A
FAM189A2
FASN
FBXO17
FBXO2
FBXO27
FMO2
FOXI1
FXYD3
GALNT15
GAPDHS
GCAT
GDF5
GFAP
GGT6
GHR
GJB3
GJB4
GJB5
GPC6
GPD1
GPR56
GPT
GPT2
GPX3
GRB7
GSN
GSTM2
HADH
HDHD3
HIF3A
HIST2H2BE
HMGA1
HMGCS2
HOGA1
HRASLS5
HRCT1
HSBP1L1
HSD17B13
HSDL2
HSPA1B
HSPA2
HSPB3
HYAL4
IL17RE
IL1F10
IMMP2L
INHA
INPP5J
ITGA7
IZUMO4
JPH1
KANK1
KANK4
KCNAB1
KCNJ12
KCNQ4
KCTD1
KIAA0319
KIAA1522
KIF12
KIFC2
KLHDC7A
KLHL26
KLK10
KLK5
KRT17
KRT2
KRT6B
KRT78
KRT79
KRT8
KRTCAP3
KRTDAP
LCN2
LEP
LGALS7B
LGI3
LIN7B
LINC00263
LINC00341
LINC00885
LINC01485
LLGL2
LMF1
LNX1
LOC100132215
LOC113230
LOC284023
LPIN1
LPIN3
LPL
LRRC16B
LSMEM2
LY6G5B
LY6G6C
LYNX1
MACROD2
MAN2A2
MAP3K9
MESP1
MEST
MFSD4
MGAT3
MIR210HG
MIR600HG
MISP
MMD
MOCS1
MROH6
MSMB
MT4
MUSTN1
MYEOV
MYH3
NCCRP1
NCS1
NDRG4
NECAB3
NEDD4L
NGEF
NKPD1
NNAT
NOL3
NPC1L1
NPR2
NPY1R
NWD1
OBP2B
OCLN
OPLAH
OSBPL1A
OSGIN2
OTX1
OXCT1
PALMD
PAQR7
PARK2
PCYT2
PDE11A
PECR
PELI3
PFKFB3
PHKG1
PHLDA3
PKD1L2
PKP2
PKP3
PLCB4
PLD6
PLEKHG6
PLIN5
PLXNA4
PLXNB1
PM20D1
PNPLA2
PODXL2
PPAP2C
PPL
PPP1R1B
PRDX2
PRKAR2B
PRPH
PRR15L
PRSS27
PRSS3
PRSS8
PRX
PSCA
PSORS1C2
PTK6
QDPR
RAC3
RAMP1
RAPGEFL1
RASEF
RASL11A
RBBP8NL
RBP7
RDH5
RHOD
RHPN2
RNASE7
RNF208
RORC
S100A1
S100A14
S100P
SBK1
SBSN
SBSPON
SCARB1
SCN4A
SCNN1A
SDC4
SEL1L2
SELENBP1
SEMA3B
SEMA3G
SERINC2
SERPINA12
SGCA
SH2D4A
SH3BGR
SH3D21
SHROOM3
SLC14A1
SLC1A5
SLC1A6
SLC22A5
SLC25A1
SLC25A23
SLC26A7
SLC27A2
SLC29A2
SLC44A4
SLC6A9
SLC7A10
SLC8A2
SLPI
SLURP1
SORBS2
SOX10
SOX5
SOX8
STAP2
STARD10
SULT2B1
SYNE4
SYNGR1
SYT8
TECR
TFAP2E
TGM1
THEM5
THRSP
TLCD2
TLN2
TMCC2
TMEM139
TMEM184A
TMEM213
TMEM25
TMEM253
TMEM254
TMEM79
TMPRSS6
TNNC1
TNNI2
TNNT2
TNS1
TPRG1-AS1
TRPV6
TSKU
TSPAN1
TSPAN8
TST
TTC36
TTYH1
TYSND1
UPB1
UPK1A
USP2
USP54
VSIG10L
WNT4
WWC1
ZG16B
ZNF219
ZNF296
ZNF385A
ZNF395

## Sheet: hypo KS up KS
Gene Up
A2M
ABI3
ADAM12
ADAMTS5
ADORA2A
ADORA3
AIF1
AIM2
ALOX5AP
APOBR
ARHGAP15
ARHGAP25
ARHGAP9
ARHGEF3
ARSB
ASAP1
BATF2
BTN3A2
C1orf162
C22orf34
C3AR1
CARD16
CARD8
CCDC141
CCDC167
CCR1
CCR5
CD177
CD247
CD27
CD28
CD300A
CD300E
CD300LF
CD34
CD3D
CD48
CD53
CD72
CD80
CD86
CD93
CECR1
CHRNA1
CLEC2D
CMTM3
CMTM7
COL1A1
COL4A2
CPVL
CSF2RB
CYBA
CYTH4
DOCK10
DOCK8
DYNLT1
EMILIN1
ERG
ETS1
EVI2A
EVI2B
EXOC3L2
F2RL3
FAIM3
FAM107B
FAM124B
FAM78A
FAP
FASLG
FERMT3
FILIP1
FSD1
FYB
FYN
GIMAP1-GIMAP5
GIMAP4
GIMAP8
GLIPR1
GMFG
GNGT2
GPR1
GPR171
GRAMD1A
GUCY1B3
GZMA
GZMB
HAVCR2
HCLS1
HIC1
HK3
HLA-DMB
HLA-DPA1
HLA-DPB1
HLA-DRA
HMHB1
HS3ST3A1
IDO1
IFFO1
IL12RB1
IL16
IL32
IL7R
INPP5D
IQCA1
ISG20
ITGA4
ITGAL
JAK3
KIF21B
KLHL3
KLHL6
LAMB1
LAPTM5
LCK
LCP2
LILRB2
LMO2
LOX
LY86
LY96
LYL1
LYVE1
MCTP1
MEF2C
MGAT4A
MMP2
MMRN1
MNDA
MS4A7
MYO1G
MZB1
NAPSB
NCKAP1L
NLRC3
NLRC4
NOX4
NREP
OAS2
OLFML2B
OPCML
PARVG
PCED1B-AS1
PDE1A
PGS1
PHACTR2
PIK3CG
PKIG
PKN1
PLCB2
PLEKHO2
PNOC
POU2F2
PPP1R16B
PRF1
PROB1
PROX1
PRR16
PRR5L
PTPN7
PTPRCAP
PXN
RARRES3
RASGRF2
RASSF2
RCSD1
RFX8
RGS3
ROBO4
RPS6KA2
RRN3P2
RTP4
SAMD3
SCIMP
SELPLG
SH2B3
SH2D2A
SH2D3C
SIGIRR
SIGLEC12
SIGLEC9
SIPA1
SIRPB2
SIT1
SLA
SLA2
SLAMF6
SLAMF8
SLC12A5
SLC5A4
SLC7A7
SNX20
SP140
SPTA1
TBC1D10C
TCF4
TFPI
TIE1
TIGIT
TLR1
TLR4
TMC8
TMEM150B
TNFSF4
TOR4A
TPM3
TREM2
TRPM2
UXS1
VAMP5
VNN2
VOPP1
WIPF1
ZAP70
ZBP1
ZNF101
